# Supplementary material
Source: bioRxiv or medRxiv preprint supplement (https://medrxiv.org/highwire/filestream/90824/field_highwire_adjunct_files/0/2020.07.22.20159772-1.pdf)
Supplement: Supplementary file [file 2020.07.22.20159772-1.pdf]

# Projecting contact matrices in 177 geographical regions: an update and comparison with empirical data for the COVID-19 era

## Supplementary Material

Kiesha Prem, Kevin van Zandvoort, Petra Klepac, Rosalind M Eggo, Nicholas G Davies, Centre for the Mathematical Modelling of Infectious Diseases COVID-19 Working Group, Alex R Cook, Mark Jit\*

## Contents

|          |                                                                                                                    |            |
|----------|--------------------------------------------------------------------------------------------------------------------|------------|
| <b>1</b> | <b>Materials and methods</b>                                                                                       | <b>1</b>   |
| 1.1      | Population age structure . . . . .                                                                                 | 1          |
| 1.2      | Household age structure . . . . .                                                                                  | 2          |
| 1.3      | Working population . . . . .                                                                                       | 4          |
| 1.4      | School-going population . . . . .                                                                                  | 4          |
| 1.5      | Age- and location-specific contacts . . . . .                                                                      | 4          |
| 1.6      | Age- and location-specific contacts by rural and urban areas . . . . .                                             | 8          |
| 1.7      | Age-stratified compartmental model of the physical distancing interventions for COVID-19 . . . . .                 | 8          |
| <b>2</b> | <b>Results</b>                                                                                                     | <b>10</b>  |
| 2.1      | Household age matrix (HAM) validation for POLYMOD and DHS countries . . . . .                                      | 10         |
| 2.2      | Household age matrix (HAM) urban and rural comparison . . . . .                                                    | 28         |
| 2.3      | Updated age- and location-specific contact matrices . . . . .                                                      | 71         |
| 2.4      | Comparison of the empirical and 2017 synthetic age-specific contact matrices in ten geographical regions . . . . . | 249        |
| 2.5      | Age-specific infection attack rate of COVID-19 . . . . .                                                           | 252        |
|          | <b>References</b>                                                                                                  | <b>255</b> |

## 1 Materials and methods

### 1.1 Population age structure

The United Nations Population Division provides the population age composition in five-year age intervals  $P_a$  (i.e., number of individuals in age group  $a$ ) for the 177 geographical regions in this study [1]. They also present the estimation of rural and urban population age compositions for the 177 geographical regions [2].

---

\*Correspondence to mark.jit@lshtm.ac.uk.

## 1.2 Household age structure

### 1.2.1 Household data

We extracted the household data from POLYMOD contact study [3]—for the eight POLYMOD countries: Belgium, Germany, Finland, the United Kingdom, Italy, Luxembourg, the Netherlands, and Poland. The Demographic Household Surveys (DHS) provides nationally-representative household surveys of the whole population for several low- and middle-income countries [4]. Table 1 lists the 43 DHS countries included in the study. The largest survey conducted in India in 2015 included ~3 million individuals from ~600,000 households. The DHS also provides data for rural and urban areas, allowing us to derive rural-urban household age matrices.

### 1.2.2 Household age matrix (HAM)

To estimate the age-specific contacts at home for county  $c$ , we need to first construct the household age matrix (HAM) for country  $c$ . The HAM of country  $c$ ,  $\mathbf{h}_{a,\alpha}^c$ , represents the mean number of household members of age  $\alpha$  of an individual aged  $a$ . Although this can be easily derived for the 8 POLYMOD and 43 DHS countries, it is not straightforward for other countries or geographical regions without available household structure data. In Prem et al. [5], we provide detailed steps to project a country’s household age structure.

1. **Population ratio matrices:** For the 51 POLYMOD and DHS countries, we first derive their population ratio matrices  $\mathbf{\Pi}_{a,\alpha}^c$  by dividing the elements of HAM ( $\mathbf{h}_{a,\alpha}^c$ ) by the proportion of the population of country  $c$  aged  $a$ ,  $P_a^c$ . The population ratio matrix of a country measures the propensity of having a household member aged  $\alpha$  for an individual aged  $a$  after adjusting for the population age structure. Because we know the population age composition for the 177 geographical regions, we can project their HAM by extrapolating the relationship between  $P_a^c$  and  $\mathbf{h}_{a,\alpha}^c$  as estimated from the POLYMOD and DHS countries, and applying that to the country’s population age profile. We could simply use the mean population ratio matrix of the POLYMOD and DHS countries to derive the HAM of country  $c$ ,  $\mathbf{h}_{a,\alpha}^c$ , as follows  $P_a^c \overline{\mathbf{\Pi}_{a,\alpha}^c}$ .
2. **HAM weights:** However, as household age structures vary across countries in different stages of development and with different demographics, we use 14 country characteristics from the World Bank and United Nations Educational, Scientific and Cultural Organization Institute for Statistics (UIS) databases [6] to quantify the similarity of these 126 geographical regions (with no available household data). The 14 country characteristics include gross domestic product per capita, total fertility rate and adolescent fertility rate, population density, population growth rate, under-five mortality rate, the life expectancy of males and females, mortality rates of males, risk of maternal death, mortality from road traffic injury, the incidence of tuberculosis, as proxies for overall health, internet penetration rate, and secondary school education attainment levels in the country. We then calculate the pairwise Euclidean distances of each of the 14 standardized variables of these 126 geographical regions with the 51 POLYMOD and DHS countries. We generated 10 000 bootstrap samples of the pairwise distances between countries (between indicators) and selected the combination that maximized the correlation between  $P_a^c$  and  $\sum_{\alpha} P_{\alpha}^c \mathbf{h}_{a,\alpha}^c$ . For each of the 126 geographical regions, the reciprocal of the bootstrapped pairwise distances provides the weights which we then use to derive the weighted mean of the population ratio matrices of the 51 POLYMOD and DHS countries.
3. **HAM projection:** Using the derived weighted mean of the population ratio matrices, we project the HAM  $\mathbf{h}_{a,\alpha}^c$  for geographical region  $c$ .

### 1.2.3 Household age matrix (HAM) validation for POLYMOD and DHS countries

In section 1.2.2, we describe the methods used to project the HAM of a country.

We perform internal validation using leave-one-out validation to verify that the HAM describing household structure could be reverse-engineered for the POLYMOD and DHS countries for which empirical household

Table 1: Description of Demographic Household Surveys from 43 countries.

| Country                          | Country code* | Survey year | Survey Type    | Number of households | Number of individuals |
|----------------------------------|---------------|-------------|----------------|----------------------|-----------------------|
| Afghanistan                      | AFG           | 2015        | Standard DHS   | 24395                | 203708                |
| Angola                           | AGO           | 2015        | Standard DHS   | 16109                | 74902                 |
| Bangladesh                       | BGD           | 2014        | Standard DHS   | 17300                | 81624                 |
| Benin                            | BEN           | 2017        | Standard DHS   | 14156                | 74673                 |
| Bolivia (Plurinational State of) | BOL           | 2008        | Standard DHS   | 19564                | 77757                 |
| Cambodia                         | KHM           | 2014        | Standard DHS   | 15825                | 74122                 |
| Cameroon                         | CMR           | 2011        | Standard DHS   | 14214                | 72622                 |
| Chad                             | TCD           | 2014        | Standard DHS   | 17233                | 99620                 |
| Colombia                         | COL           | 2015        | Standard DHS   | 44614                | 162459                |
| Congo                            | COG           | 2011        | Standard DHS   | 11632                | 51449                 |
| Democratic Republic of the Congo | COD           | 2013        | Standard DHS   | 18171                | 95949                 |
| Dominican Republic               | DOM           | 2013        | Standard DHS   | 11464                | 41267                 |
| Ethiopia                         | ETH           | 2016        | Standard DHS   | 16650                | 75224                 |
| Ghana                            | GHA           | 2017        | Standard DHS   | 11835                | 43945                 |
| Guatemala                        | GTM           | 2014        | Standard DHS   | 21383                | 102510                |
| Guinea                           | GIN           | 2018        | Standard DHS   | 7912                 | 49543                 |
| Guyana                           | GUY           | 2009        | Standard DHS   | 5632                 | 22845                 |
| Haiti                            | HTI           | 2016        | Standard DHS   | 13405                | 59547                 |
| Honduras                         | HND           | 2011        | Standard DHS   | 21362                | 100555                |
| India                            | IND           | 2015        | Standard DHS   | 601509               | 2869043               |
| Indonesia                        | IDN           | 2017        | Standard DHS   | 47963                | 197723                |
| Kenya                            | KEN           | 2014        | Standard DHS   | 36430                | 153840                |
| Kyrgyzstan                       | KGZ           | 2012        | Standard DHS   | 8040                 | 35805                 |
| Lesotho                          | LSO           | 2014        | Standard DHS   | 9402                 | 40197                 |
| Liberia                          | LBR           | 2013        | Standard DHS   | 9333                 | 48219                 |
| Malawi                           | MWI           | 2015        | Standard DHS   | 26361                | 120492                |
| Maldives                         | MDV           | 2016        | Standard DHS   | 6050                 | 32656                 |
| Mali                             | MLI           | 2018        | Standard DHS   | 9510                 | 54571                 |
| Nepal                            | NPL           | 2016        | Standard DHS   | 11040                | 49064                 |
| Niger                            | NER           | 2012        | Standard DHS   | 10750                | 64011                 |
| Nigeria                          | NGA           | 2018        | Standard DHS   | 40427                | 188010                |
| Pakistan                         | PAK           | 2017        | Standard DHS   | 14540                | 100869                |
| Peru                             | PER           | 2012        | Continuous DHS | 27218                | 103211                |
| Philippines                      | PHL           | 2017        | Standard DHS   | 27496                | 120273                |
| Senegal                          | SEN           | 2017        | Continuous DHS | 8380                 | 78950                 |
| Sierra Leone                     | SLE           | 2013        | Standard DHS   | 12629                | 75299                 |
| South Africa                     | ZAF           | 2016        | Standard DHS   | 11083                | 38850                 |
| Timor-Leste                      | TLS           | 2016        | Standard DHS   | 11502                | 61496                 |
| Togo                             | TGO           | 2013        | Standard DHS   | 9549                 | 46577                 |
| Uganda                           | UGA           | 2016        | Standard DHS   | 19588                | 91167                 |
| Viet Nam                         | VNM           | 2005        | Standard AIS   | 6337                 | 26833                 |
| Zambia                           | ZMB           | 2018        | Standard DHS   | 12831                | 65454                 |
| Zimbabwe                         | ZWE           | 2015        | Standard DHS   | 10534                | 43706                 |

age matrices were available. The steps involve projecting that country’s household age structure as if it were unknown (i.e., following steps 1–3 described in section 1.2.2) and then comparing against the empirical household data to assess the method’s performance.

### 1.3 Working population

We allow the number of age-specific contacts made at the workplace to depend on the age structure of the workforce. To derive the working population matrices for each geographical location, we used the 2019 labour force participation rate by sex and 5-year age groups  $w_a$  for the 177 geographical regions from the International Labour Organization (ILO) [7] to compute a joint distribution of the working population,  $\mathbf{W}$ . The working population,  $\mathbf{W}^c$ , a square matrix with elements describing the probability of encounters between two ages— $a$  and  $\alpha$ —in the workforce of country/geographical region  $c$ , is given by

$$\mathbf{W}_{a,\alpha}^c = w_a^c \times w_\alpha^c.$$

After constructing the working population distribution of ages  $\mathbf{W}^c$ , we project the age-specific contact patterns in the workplace for non-POLYMOD countries.

### 1.4 School-going population

Similarly, for age-specific contact patterns at school, we construct the age-specific school-going population, including teachers, before projecting the contact patterns in schools. Information on enrolment rates, age ranges of students, pupil-to-teacher ratios by education levels (i.e. pre-primary, primary, secondary, and tertiary) were obtained from UIS [6] and the distribution of teachers by age from Organisation for Economic Co-operation and Development (OECD) [8].

To project the school population, we perform the following steps:

1. **Number of students estimation:** We first estimate the proportion of students in each age interval using the country-specific enrolment rates and the starting and ending ages of students by education level. Together with the population age structure  $P_a^c$ , we then estimate the number of students  $s_a^c$  aged  $a$  in country  $c$ . We also estimate the number of students in each education level  $l$ ,  $s_l^c$ , for the education levels pre-primary, primary, secondary, and tertiary.
2. **Number of teachers estimation:** After estimating the number of students for each education level in country  $c$ ,  $s_l^c$ , we use the country-specific pupil-to-teacher ratio to estimate the number of teachers for each education level,  $l$ ,  $t_l^c$ . Together with labour force participation rates by aged and the distribution of teachers by ages, we then estimate the number of teachers  $t_a^c$  aged  $a$  in country  $c$ .
3. **School-going population construction:** We project the school population distribution of ages, as follows:

$$\mathbf{S}_{a,\alpha}^c = \left( \frac{s_a^c}{\sum_i s_i^c} + \frac{t_a^c}{\sum_i t_i^c} \right) \times \left( \frac{s_\alpha^c}{\sum_i s_i^c} + \frac{t_\alpha^c}{\sum_i t_i^c} \right).$$

The elements of  $\mathbf{S}_{a,\alpha}^c$  present the probability of encounters between two ages within schools.

### 1.5 Age- and location-specific contacts

In Prem et al. (2017) [5], we employed a Bayesian hierarchical modelling framework to estimate modelling to estimate the proclivity of age- and location-specific contact patterns in the POLYMOD countries. The framework estimates both individual-level and population-level parameters and addresses the multi-level structure of the data, accounting for repeat measurements of contacts made in different settings by the same individual in the data. The parameter  $\lambda_{a,\alpha}^L$  is the key estimand in the model, and it quantifies typical contact rates between individuals of age groups  $a$  and  $\alpha$  at location  $L$ . With the projected populations at home, work

and school available for the 177 geographical regions (listed in Table 2), we can now deduce the possible age- and location-specific contact matrices:

- **Age-specific contacts at home:** Given the projected HAM  $\mathbf{h}_{a,\alpha}^c$  for country  $c$ , we can now deduce the possible age-specific contact patterns at home for country  $c$  to be:

$$\mu_{a,\alpha}^{H,c} = \lambda_{a,\alpha}^H \times \mathbf{h}_{a,\alpha}^c.$$

- **Age-specific contacts in the workplace:** Having projected the age-specific working populations for the 177 geographical regions  $\mathbf{W}_{a,\alpha}^c$ , we can infer the age-specific contact in the workplace for country  $c$  by the following expression:

$$\mu_{a,\alpha}^{W,c} = \lambda_{a,\alpha}^W \times \mathbf{W}_{a,\alpha}^c \times \frac{P_\alpha^c}{P_\alpha^{POLYMOD}}.$$

- **Age-specific contact in school:** With the projected school-going population available for the 177 geographical regions  $\mathbf{S}_{a,\alpha}^c$ , we can now deduce the possible age-specific contact patterns in school for country  $c$ , as follows:

$$\mu_{a,\alpha}^{S,c} = \lambda_{a,\alpha}^S \times \mathbf{S}_{a,\alpha}^c \times \frac{P_\alpha^c}{P_\alpha^{POLYMOD}}.$$

- **Age-specific contact at other locations:** We estimate the possible age-specific contacts at other locations (i.e., non-home, work, or school) for country  $c$ , as follows:

$$\mu_{a,\alpha}^{O,c} = \lambda_{a,\alpha}^O \times \frac{P_\alpha^c}{P_\alpha^{POLYMOD}}.$$

Table 2: Geographical regions included in the study

| Regions                          | County code | Regions                          | County code |
|----------------------------------|-------------|----------------------------------|-------------|
| Afghanistan                      | AFG         | Ecuador                          | ECU         |
| Albania                          | ALB         | Egypt                            | EGY         |
| Algeria                          | DZA         | El Salvador                      | SLV         |
| Angola                           | AGO         | Equatorial Guinea                | GNQ         |
| Argentina                        | ARG         | Eritrea                          | ERI         |
| Armenia                          | ARM         | Estonia                          | EST         |
| Austria                          | AUT         | Eswatini                         | SWZ         |
| Azerbaijan                       | AZE         | Ethiopia                         | ETH         |
| Bahamas                          | BHS         | Fiji                             | FJI         |
| Bahrain                          | BHR         | Finland                          | FIN         |
| Bangladesh                       | BGD         | France                           | FRA         |
| Barbados                         | BRB         | Gabon                            | GAB         |
| Belarus                          | BLR         | Gambia                           | GMB         |
| Belgium                          | BEL         | Georgia                          | GEO         |
| Belize                           | BLZ         | Germany                          | DEU         |
| Benin                            | BEN         | Ghana                            | GHA         |
| Bhutan                           | BTN         | Greece                           | GRC         |
| Bolivia (Plurinational State of) | BOL         | Guatemala                        | GTM         |
| Bosnia and Herzegovina           | BIH         | Guinea                           | GIN         |
| Botswana                         | BWA         | Guinea-Bissau                    | GNB         |
| Brazil                           | BRA         | Guyana                           | GUY         |
| Brunei Darussalam                | BRN         | Honduras                         | HND         |
| Bulgaria                         | BGR         | Hungary                          | HUN         |
| Burkina Faso                     | BFA         | Iceland                          | ISL         |
| Burundi                          | BDI         | India                            | IND         |
| Cabo Verde                       | CPV         | Indonesia                        | IDN         |
| Cambodia                         | KHM         | Iran (Islamic Republic of)       | IRN         |
| Cameroon                         | CMR         | Iraq                             | IRQ         |
| Canada                           | CAN         | Ireland                          | IRL         |
| Central African Republic         | CAF         | Israel                           | ISR         |
| Chad                             | TCD         | Italy                            | ITA         |
| Chile                            | CHL         | Jamaica                          | JAM         |
| China                            | CHN         | Jordan                           | JOR         |
| China, Hong Kong SAR             | HKG         | Kazakhstan                       | KAZ         |
| China, Macao SAR                 | MAC         | Kenya                            | KEN         |
| Colombia                         | COL         | Kuwait                           | KWT         |
| Comoros                          | COM         | Kyrgyzstan                       | KGZ         |
| Congo                            | COG         | Lao People's Democratic Republic | LAO         |
| Costa Rica                       | CRI         | Latvia                           | LVA         |
| Côte d'Ivoire                    | CIV         | Lesotho                          | LSO         |
| Croatia                          | HRV         | Liberia                          | LBR         |
| Cuba                             | CUB         | Libya                            | LYB         |
| Cyprus                           | CYP         | Lithuania                        | LTU         |
| Czechia                          | CZE         | Luxembourg                       | LUX         |
| Dem. People's Republic of Korea  | PRK         | Madagascar                       | MDG         |
| Democratic Republic of the Congo | COD         | Malawi                           | MWI         |
| Denmark                          | DNK         | Malaysia                         | MYS         |
| Djibouti                         | DJI         | Maldives                         | MDV         |
| Dominican Republic               | DOM         | Mali                             | MLI         |

| Regions                             | County code | Regions                               | County code |
|-------------------------------------|-------------|---------------------------------------|-------------|
| Malta                               | MLT         | Sri Lanka                             | LKA         |
| Mauritania                          | MRT         | State of Palestine                    | PSE         |
| Mauritius                           | MUS         | Sudan                                 | SDN         |
| Mexico                              | MEX         | Suriname                              | SUR         |
| Mongolia                            | MNG         | Sweden                                | SWE         |
| Montenegro                          | MNE         | Switzerland                           | CHE         |
| Morocco                             | MAR         | Syrian Arab Republic                  | SYR         |
| Mozambique                          | MOZ         | Tajikistan                            | TJK         |
| Myanmar                             | MMR         | Thailand                              | THA         |
| Namibia                             | NAM         | Timor-Leste                           | TLS         |
| Nepal                               | NPL         | Togo                                  | TGO         |
| Netherlands                         | NLD         | Tonga                                 | TON         |
| New Zealand                         | NZL         | Trinidad and Tobago                   | TTO         |
| Nicaragua                           | NIC         | Tunisia                               | TUN         |
| Niger                               | NER         | Turkey                                | TUR         |
| Nigeria                             | NGA         | Turkmenistan                          | TKM         |
| North Macedonia                     | MKD         | Uganda                                | UGA         |
| Norway                              | NOR         | Ukraine                               | UKR         |
| Oman                                | OMN         | United Arab Emirates                  | ARE         |
| Pakistan                            | PAK         | United Kingdom                        | GBR         |
| Panama                              | PAN         | United Republic of Tanzania           | TZA         |
| Papua New Guinea                    | PNG         | United States of America              | USA         |
| Paraguay                            | PRY         | Uruguay                               | URY         |
| Peru                                | PER         | Uzbekistan                            | UZB         |
| Philippines                         | PHL         | Vanuatu                               | VUT         |
| Poland                              | POL         | Venezuela (Bolivarian<br>Republic of) | VEN         |
| Portugal                            | PRT         | Viet Nam                              | VNM         |
| Puerto Rico                         | PRI         | Yemen                                 | YEM         |
| Qatar                               | QAT         | Zambia                                | ZMB         |
| Republic of Korea                   | KOR         | Zimbabwe                              | ZWE         |
| Republic of Moldova                 | MDA         |                                       |             |
| Romania                             | ROU         |                                       |             |
| Russian Federation                  | RUS         |                                       |             |
| Rwanda                              | RWA         |                                       |             |
| Saint Lucia                         | LCA         |                                       |             |
| Saint Vincent and the<br>Grenadines | VCT         |                                       |             |
| Samoa                               | WSM         |                                       |             |
| Sao Tome and Principe               | STP         |                                       |             |
| Saudi Arabia                        | SAU         |                                       |             |
| Senegal                             | SEN         |                                       |             |
| Serbia                              | SRB         |                                       |             |
| Sierra Leone                        | SLE         |                                       |             |
| Singapore                           | SGP         |                                       |             |
| Slovakia                            | SVK         |                                       |             |
| Slovenia                            | SVN         |                                       |             |
| Solomon Islands                     | SLB         |                                       |             |
| South Africa                        | ZAF         |                                       |             |
| South Sudan                         | SSD         |                                       |             |
| Spain                               | ESP         |                                       |             |

## 1.6 Age- and location-specific contacts by rural and urban areas

The population age structure at the various locations—in the household, workplaces, schools, general community—varies by rural and urban subregions of country. Hence, we would expect the contact patterns within a country to also vary by rural and urban subregions. To account for these differences, we also stratified the age- and location-specific contact matrices by rural-urban areas.

The United Nations Population Division provides the estimation of rural and urban population age compositions for the 177 geographical regions [2]. The nationally-representative DHS household surveys provide data for rural and urban areas, allowing us to derive rural-urban HAM and project rural-urban HAM for the countries with no available household data (following steps 1–3 described in section 1.2.2). ILO provides the age-specific labour force participation rates by rural and urban regions [9], allowing us to determine the working population age structure,  $\mathbf{W}_{a,\alpha}^c$ , for country  $c$  by rural-urban subregions. Using the differences in rural and urban schools’ pupil-to-teacher from the OECD [10], we construct rural and urban school-going population age structures,  $\mathbf{S}_{a,\alpha}^c$ .

After projecting the populations at home, work and school for rural and urban subregions, we can then deduce the possible age- and location-specific contact matrices following the steps detailed in section 1.5.

## 1.7 Age-stratified compartmental model of the physical distancing interventions for COVID-19

We adapt a discrete-time Susceptible-Exposed-Infectious-Recovered (SEIR) compartmental model [11,12] presented in Figure 1. The model population is closed, and it ignores all demographic changes in the population (i.e., births, deaths, and ageing). The model stratifies the population into (i) disease states: susceptible, exposed (infected but not yet infectious), infectious (i.e., preclinical, clinical, or subclinical), and recovered (or died/removed) states; and (ii) 5-year age groups until age 70 years and a single category aged  $\geq 75$  years, resulting in 16 age bands.

We implement the model stochastically and allow it to select random values of parameters from the set of uncertainty distributions presented in Table 3, adapted from [11,12].

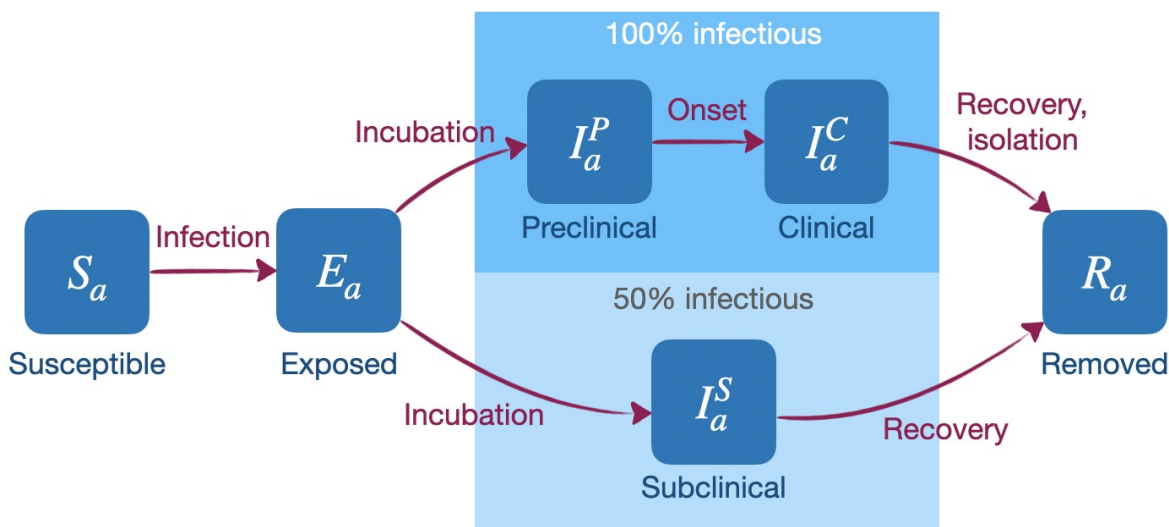

Figure 1: Age-stratified stochastic SEIR model. Adapted from Davies et al. (2020) [11].

As described in [11,12], susceptible individuals might acquire the infection when they come in contact with an



Table 3: Parameters of the age-stratified SEIR model.

|                | <b>Description</b>                                                                 | <b>Values</b>                            | <b>References</b>                                                                                      |
|----------------|------------------------------------------------------------------------------------|------------------------------------------|--------------------------------------------------------------------------------------------------------|
| $\Delta t$     | Time step for simulation                                                           | 0.25 days or 6 hours                     |                                                                                                        |
| $d_E$          | Latent period in days                                                              | $d_E \sim \text{Gamma}(4, 4)$            | [14–16]                                                                                                |
|                | <b>Duration of infectiousness in days</b>                                          |                                          |                                                                                                        |
| $d_P$          | (i) during the preclinical phase                                                   | $d_P \sim \text{Gamma}(1.5, 4)$          | [17]                                                                                                   |
| $d_C$          | (ii) during the clinical phase                                                     | $d_C \sim \text{Gamma}(3.5, 4)$          | [14–16]                                                                                                |
| $d_S$          | (iii) during the subclinical phase                                                 | $d_S \sim \text{Gamma}(5.0, 4)$          | Assumed to be the same as the total duration of infectiousness for clinical cases (i.e., $d_P + d_C$ ) |
| $y_a$          | Probability of clinical symptoms on infection for individuals aged $a$             | Age-dependent, as estimated in [18]      | [18]                                                                                                   |
| $f$            | Relative infectiousness of subclinical cases                                       | 50%                                      | Assumed                                                                                                |
| $u$            | Probability of transmission per contact with an infectious individual              | Refer to text                            | Derived                                                                                                |
| $N_a$          | Number of individuals aged $a$                                                     | Demographic data                         | [1]                                                                                                    |
| $c_{a,\alpha}$ | Number of contacts per day with individuals aged $\alpha$ by an individual age $a$ | Empirical and synthetic contact matrices |                                                                                                        |
| $R_0$          | Basic reproduction number                                                          | $R_0 \sim \text{Normal}(2.6, 0.5^2)$     | [13]                                                                                                   |
|                | Proportion of hospitalised cases requiring critical care                           | 30%                                      | [20]                                                                                                   |
|                | <b>Duration of disease in days</b>                                                 |                                          |                                                                                                        |
|                | (i) severe, non-critical disease                                                   | $\sim \text{Gamma}(8, 8)$                | NHS Digit                                                                                              |
|                | (ii) severe, critical disease                                                      | $\sim \text{Gamma}(10, 10)$              | [20]                                                                                                   |
|                | <b>Delay from symptom onset</b>                                                    |                                          |                                                                                                        |
|                | (i) to becoming a severe case (days)                                               | $\sim \text{Gamma}(7, 7)$                | [19,20]                                                                                                |
|                | (i) to death (days)                                                                | $\sim \text{Gamma}(22, 22)$              | [19,21]                                                                                                |

infectious person and enter the exposed disease state before they become infectious and later either recover or die. The time step of the model is 6 hours. We assume age-specific mixing patterns of individuals alter their likelihood of being exposed to the virus given a certain number of infectious people in the population. The force of infection defined as the rate at which susceptible individuals become exposed  $\lambda$ , and is given by for any age group  $a$  and time increment  $t$  as

$$\lambda_{a,t} = u \times \sum_{\alpha} c_{a,\alpha} \times \frac{I_{\alpha}^P + I_{\alpha}^C + f \times I_{\alpha}^S}{N_{\alpha}}$$

where  $u$  is the probability of transmission per contact with an infectious person,  $c_{a,\alpha}$  denotes the number of contacts per day with individuals aged  $\alpha$  by an individual in age group  $a$  per time increment (drawn from the contact matrix), and  $\frac{(I_{\alpha}^P + I_{\alpha}^C + f I_{\alpha}^S)}{N_{\alpha}}$  is the probability that any age  $\alpha$  individual contacted is infectious, with  $f$  denoting the relative infectiousness of subclinical cases, compared to clinical cases. The basic reproduction number  $R_0$  is defined as the average number of secondary infections generated by an infectious individual in a fully susceptible population, we calculated it as the absolute value of the dominant eigenvalue of the next generation matrix, which was derived by linearising the system at epidemic equilibrium [13]. For any stochastic run,  $u$  is derived from the ratio of this eigenvalue and the  $R_0$  value selected for that run. We considered six contact matrices when modelling the interventions to the COVID-19 pandemic: the empirically-constructed contact matrices at the study-year and adjusted for the 2020 population, the 2017 synthetic matrices, and the updated synthetic matrices at the national, rural, or urban settings.

The duration (in days) an individual spends in states  $E$ ,  $IP$ ,  $IC$ , or  $IS$  is drawn from distributions  $d_E$ ,  $d_P$ ,  $d_C$  and  $d_S$ , respectively (Table 3) [14–17]. After the latency period, infected individuals are divided into

clinical (symptomatic) and sub-clinical (asymptomatic) states with probability  $y_a$  and  $1 - y_a$ , respectively [18]. Clinical individuals will first experience a preclinical phase where they are still infectious (denoted as  $I^P$  in Figure 1), followed by a clinical and infectious phase (denoted as  $I^C$  in Figure 1). We assume that subclinical individuals, represented as  $I^S$  in Figure 1, are half as infectious as clinical cases. Clinical and subclinical individuals have the same duration of infectiousness, and we assume that their clinical severity do not affect their infectiousness. These individuals will later recover or die, and we assume that all individuals who have recovered (or have left the infectious phase) are immune until the end of the simulations. We account for delays in the transitions to different clinical disease states (such as symptom onset to severe case, critical or not; and from onset of severe symptoms to recovery or death) [19–21]. These delays are drawn from distributions reported in the literature; however, they do not change the force of infection or transmissibility.

## 2 Results

### 2.1 Household age matrix (HAM) validation for POLYMOD and DHS countries

The empirical household age structures (i.e., from the data) and the modelled household age structures (i.e., the leave-one-out validation, assuming no available household data) for each POLYMOD and DHS countries are represented in the first and second panels respectively of the figures in this section. In the third panel, a scatter plot of the entries in the observed (x-axis) and modelled (y-axis) HAM. Using the methods described in section 1.2.2, we reconstructed the empirical household age structures for the POLYMOD and DHS countries with high fidelity (median correlation between the observed and modelled HAM 0.92, with an interquartile range 0.85–0.95).

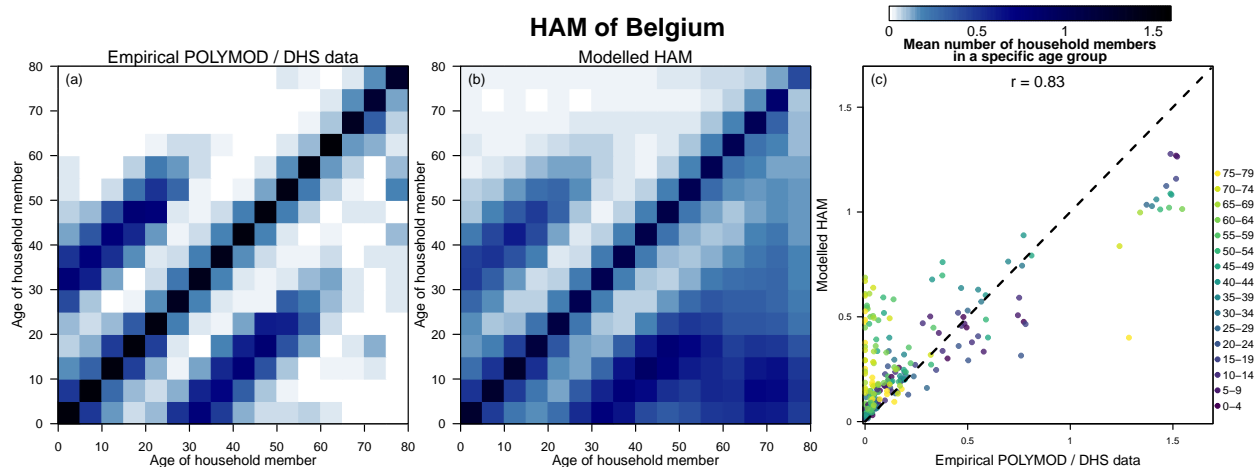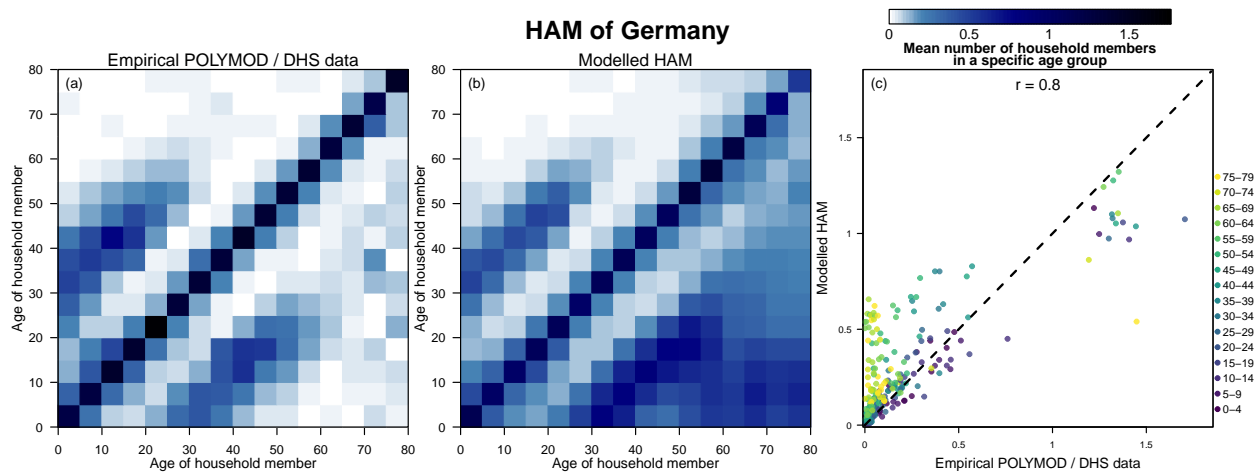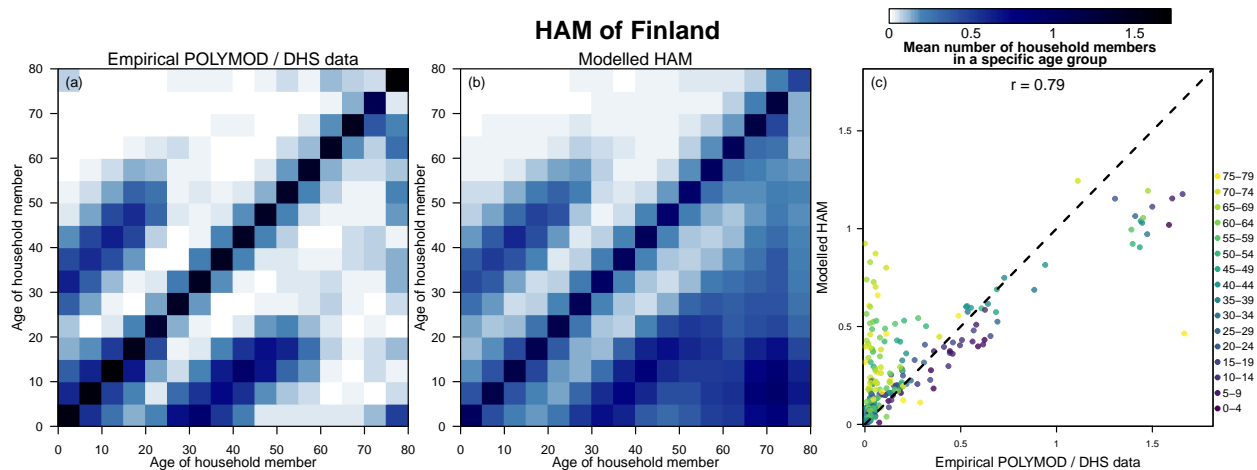

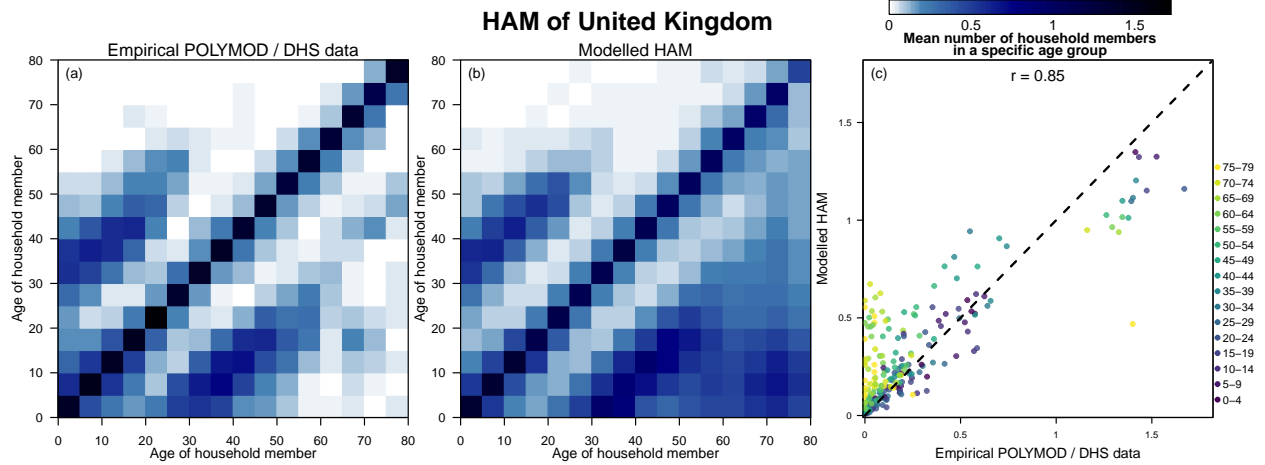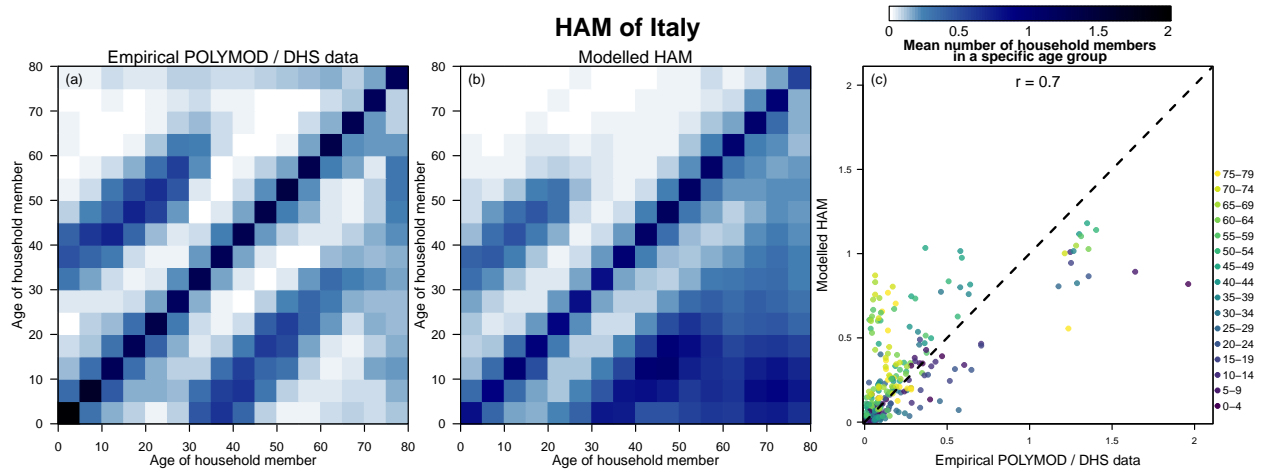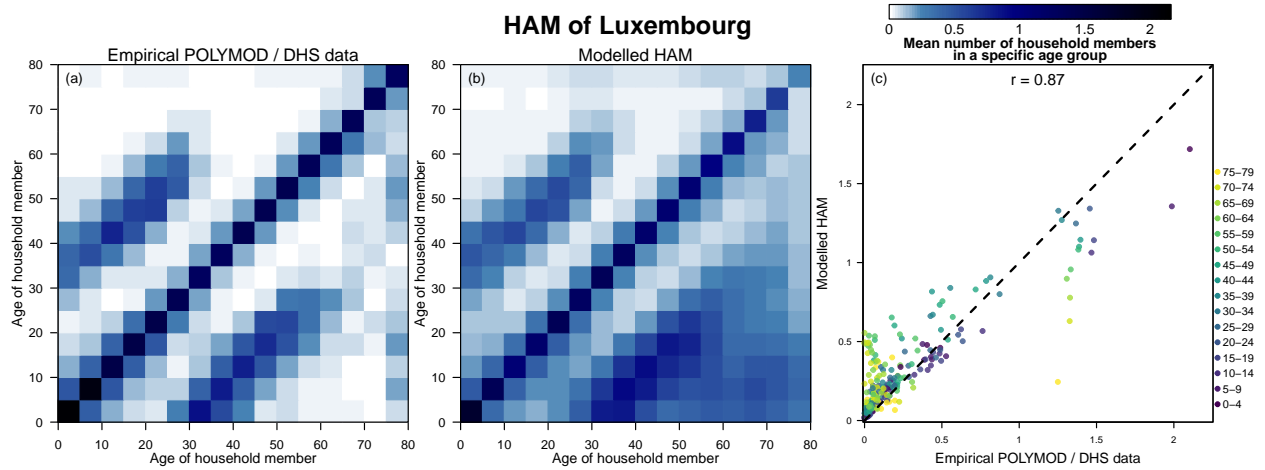

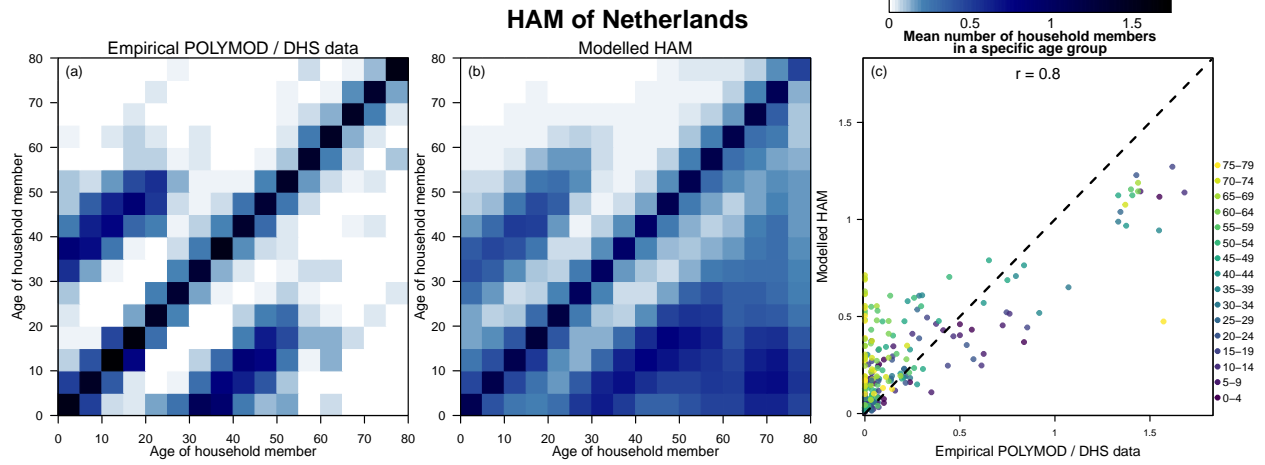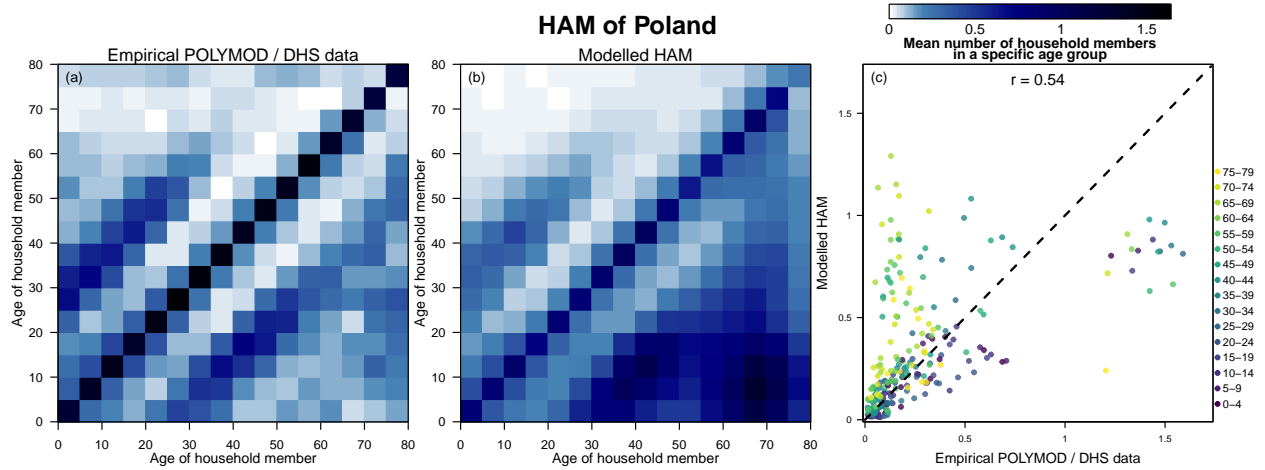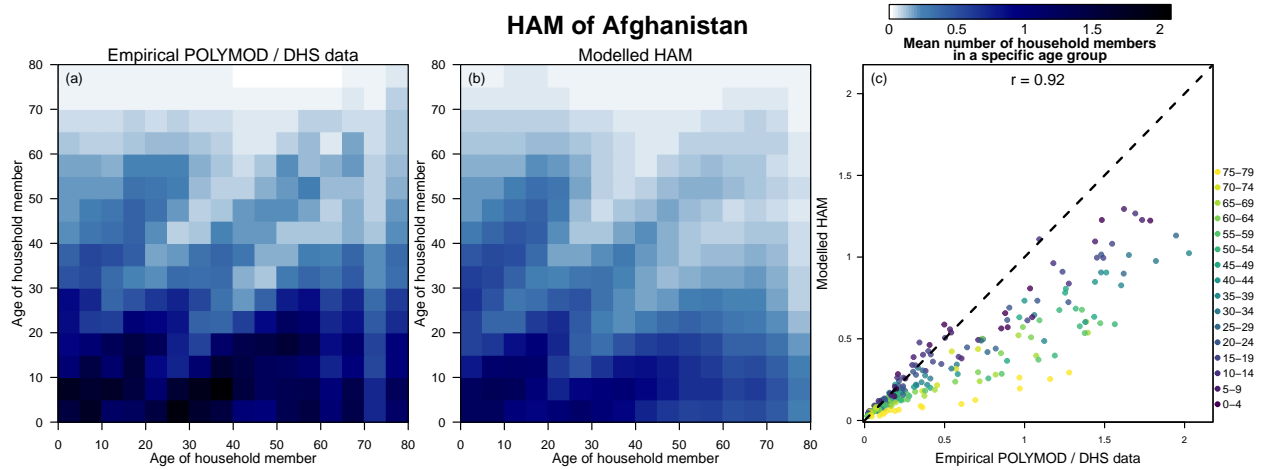

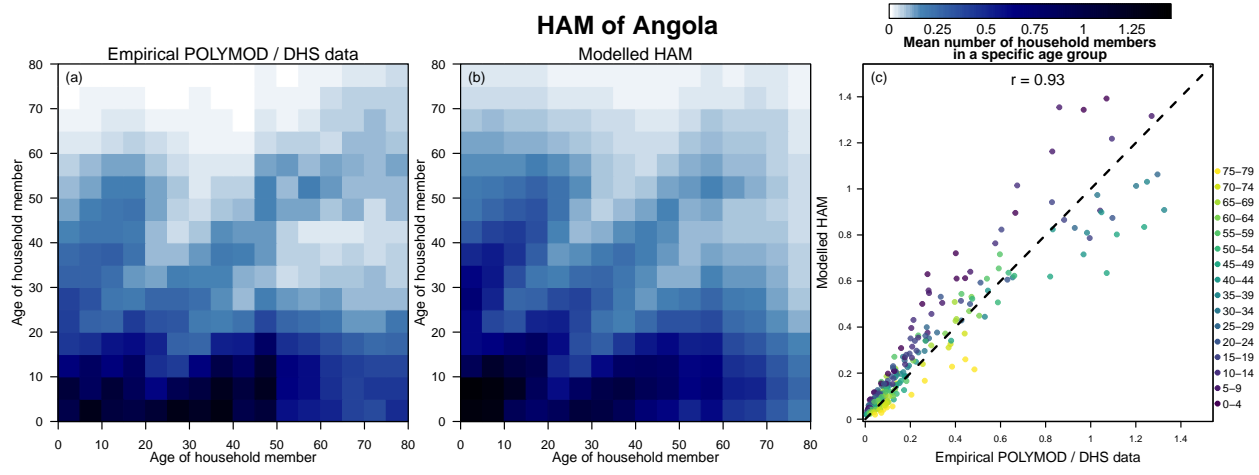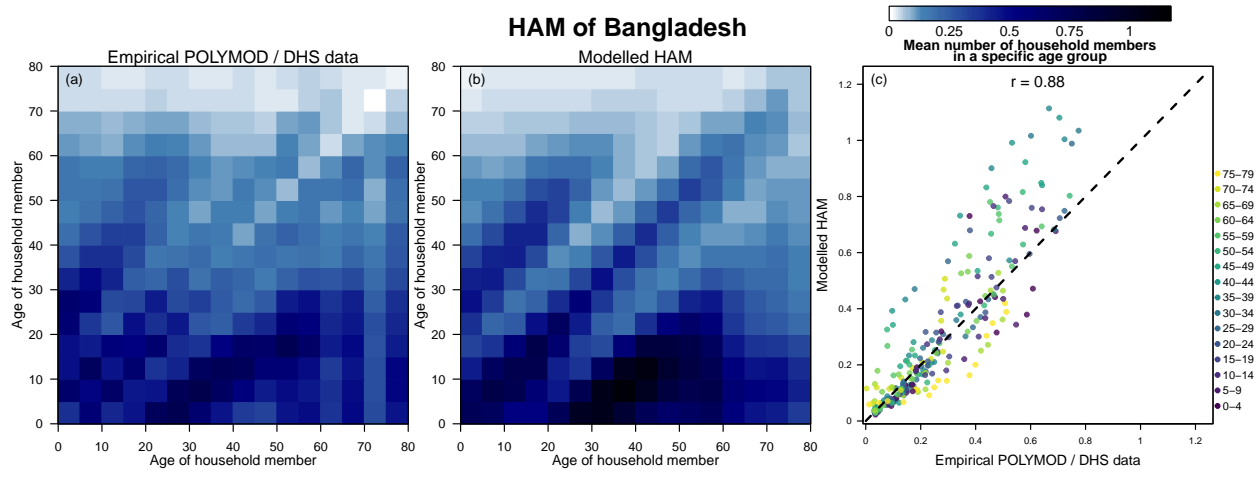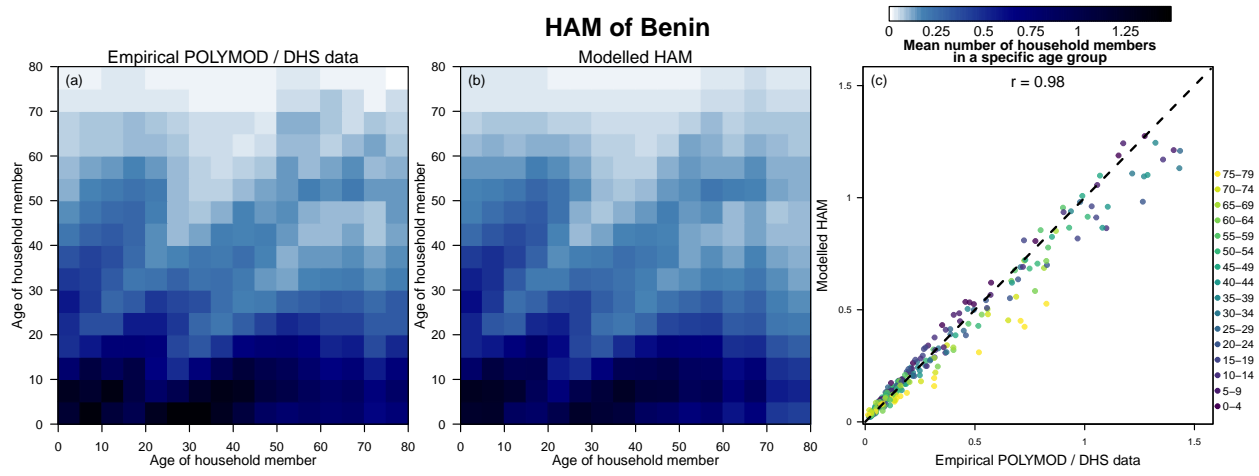

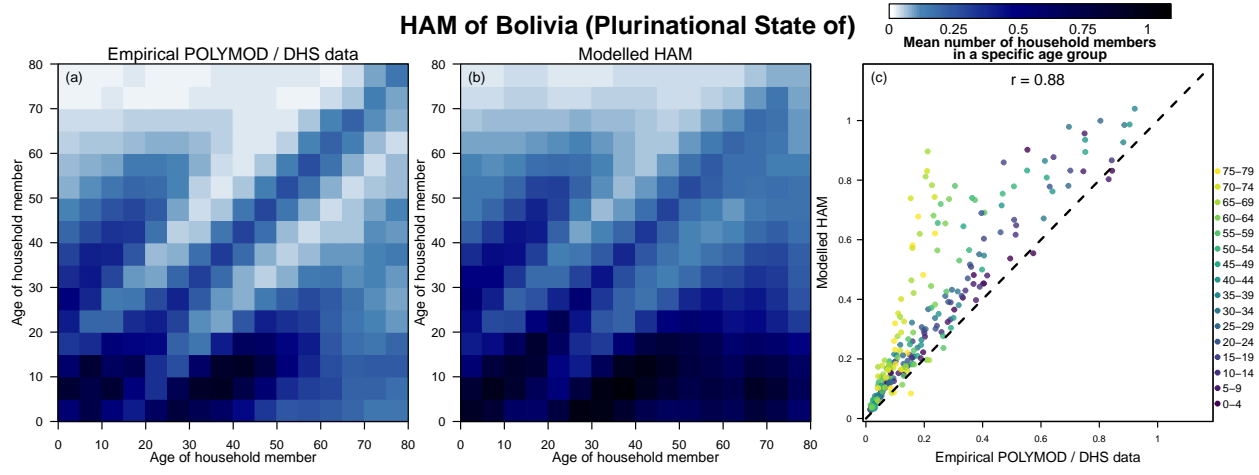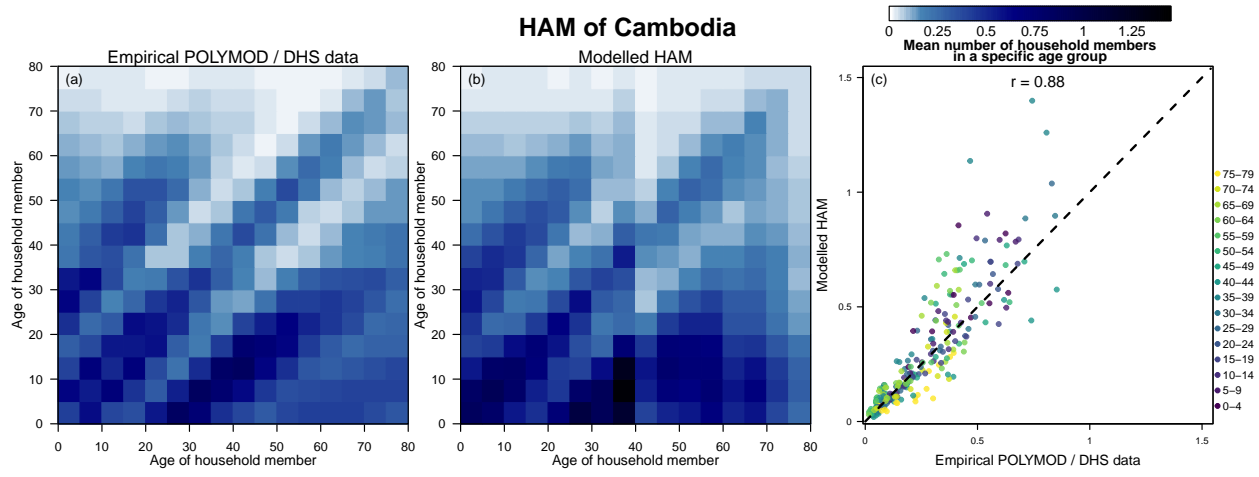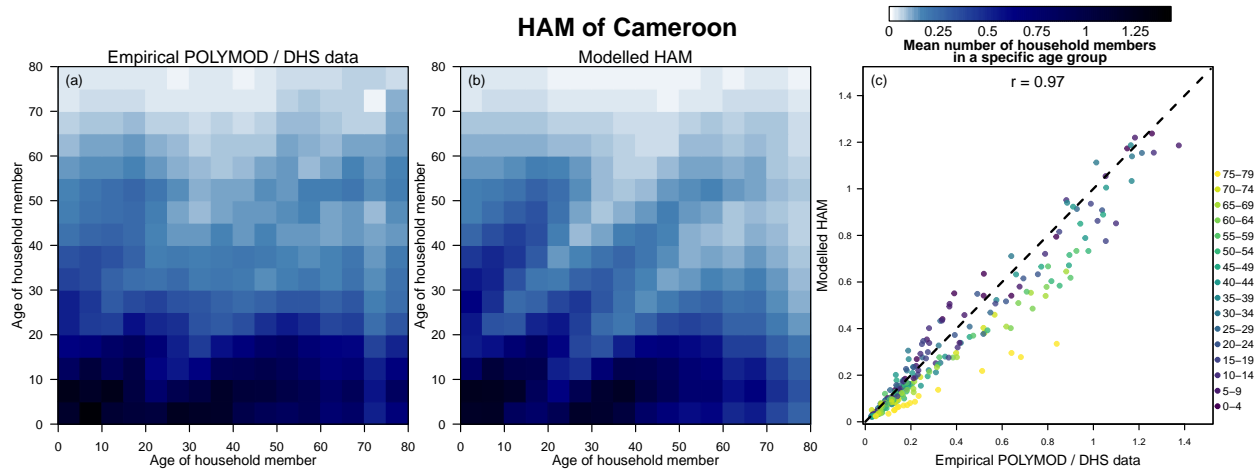

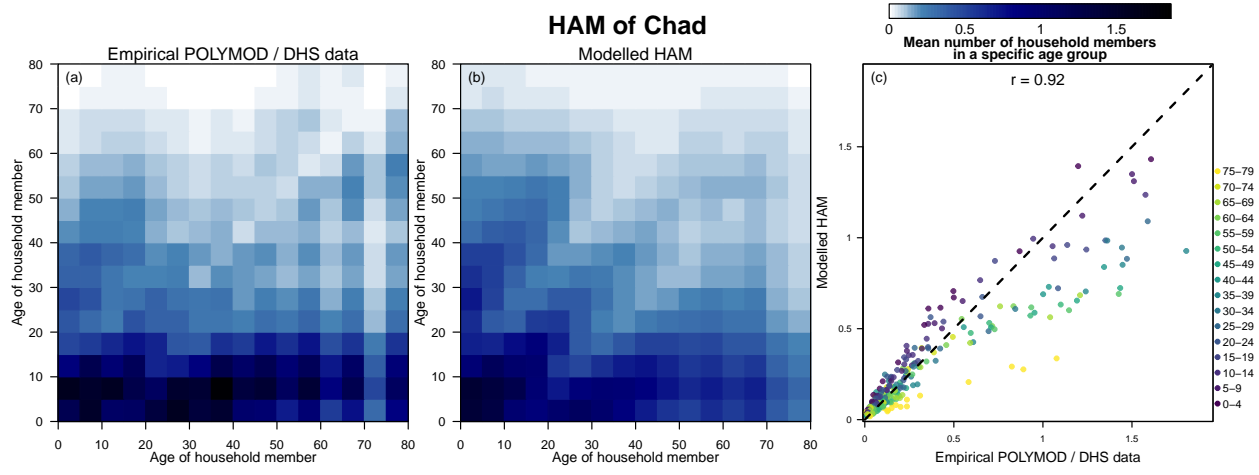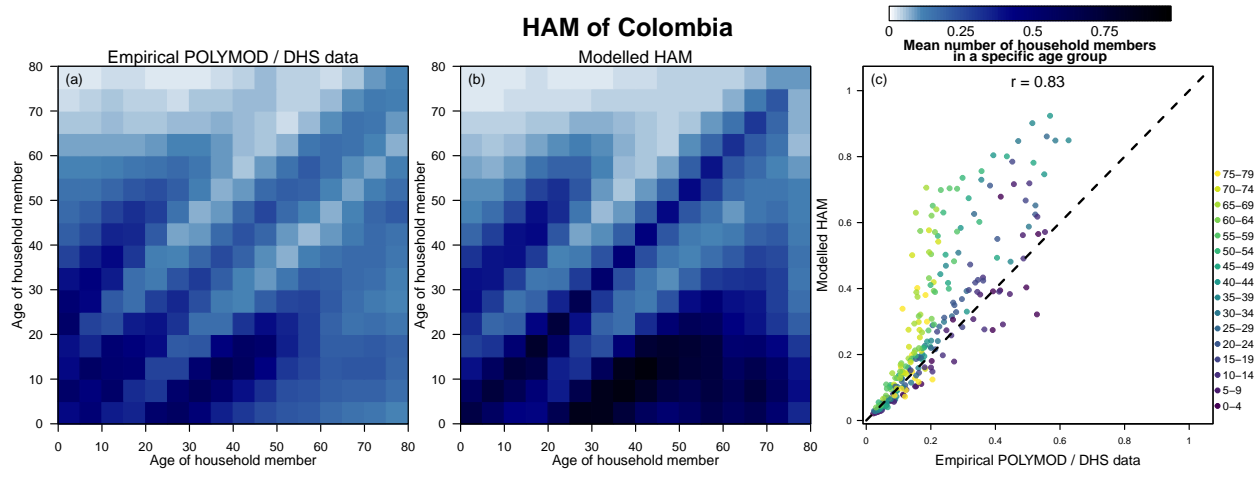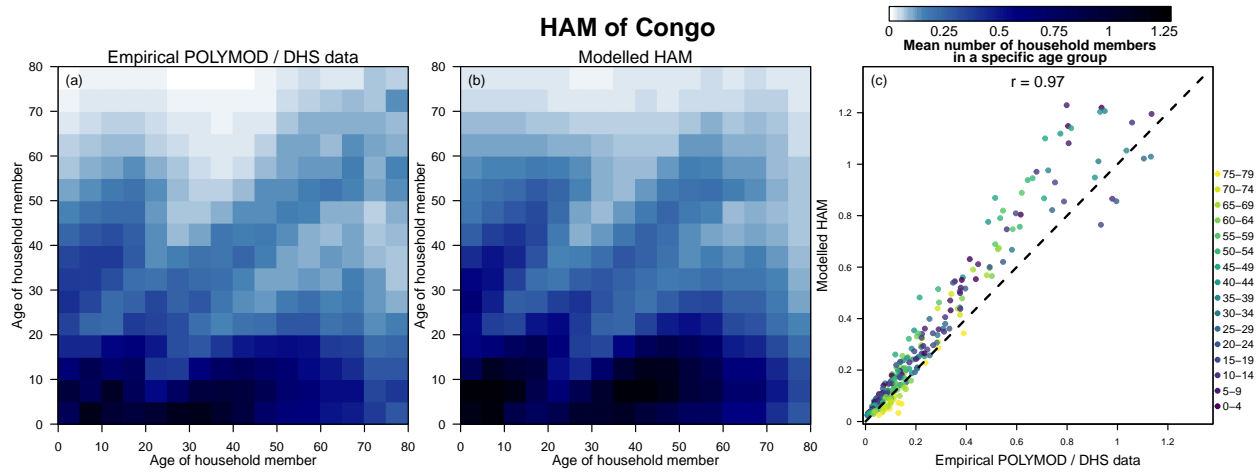



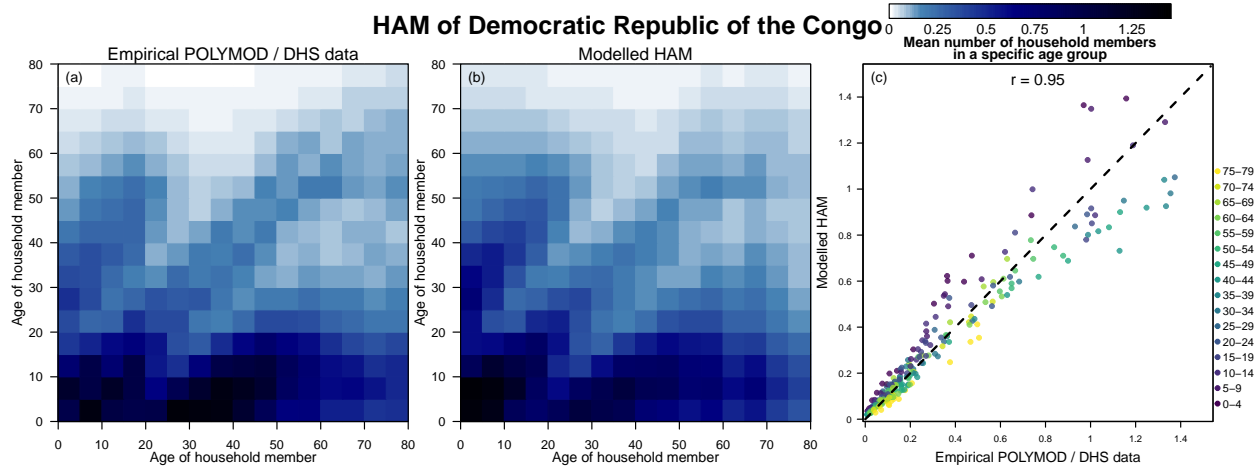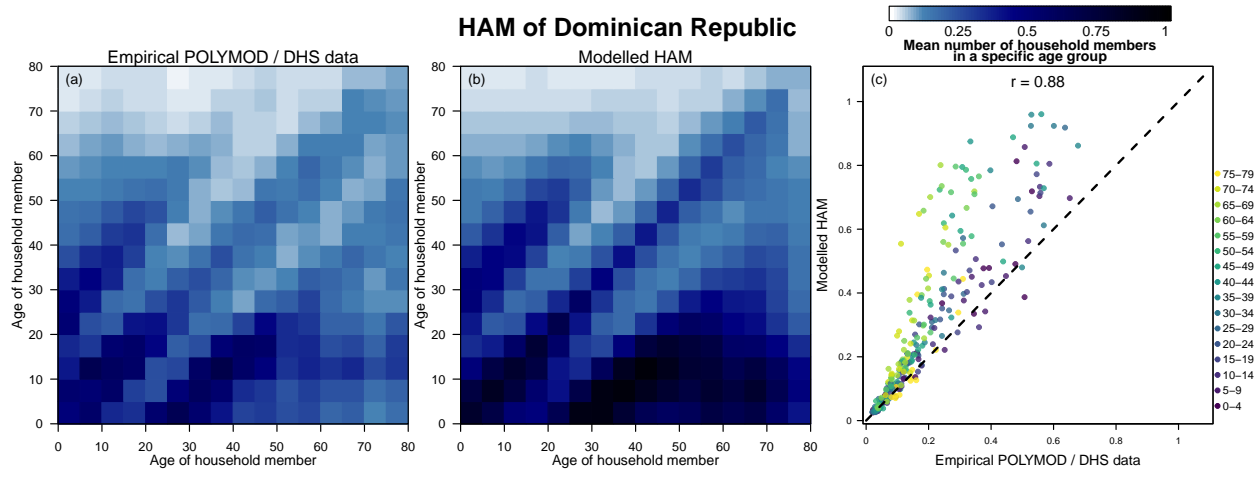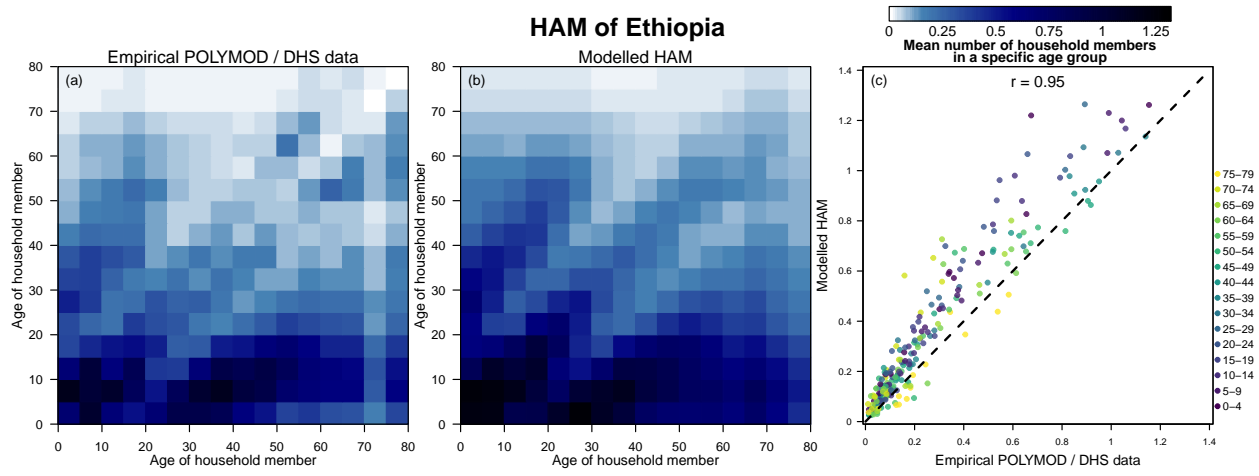

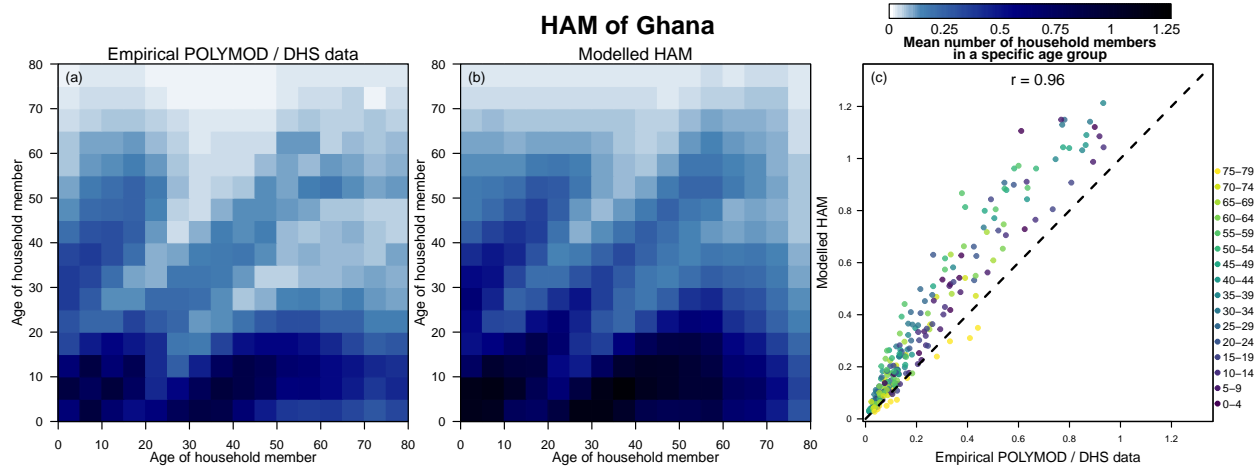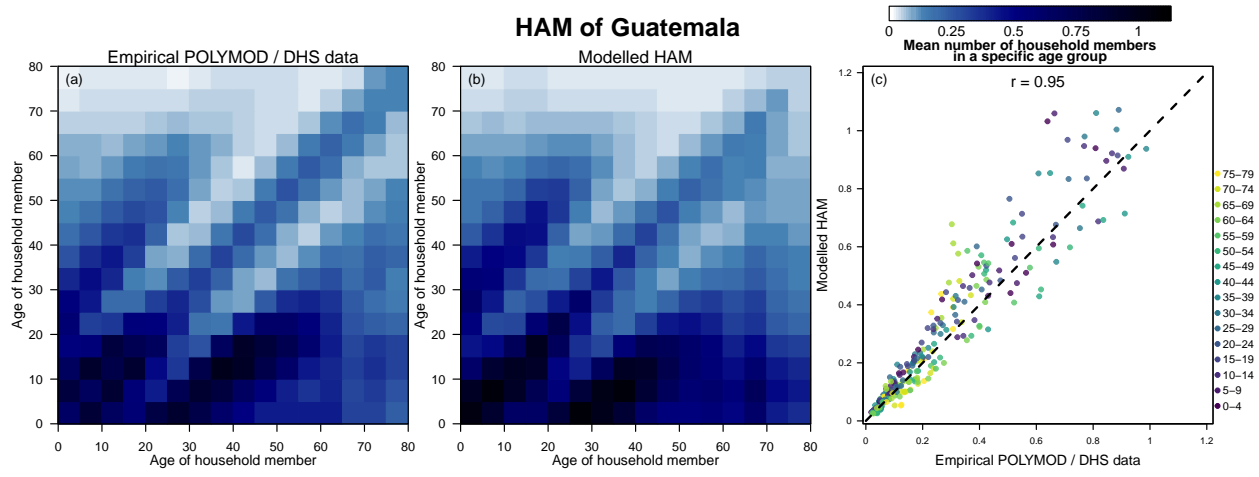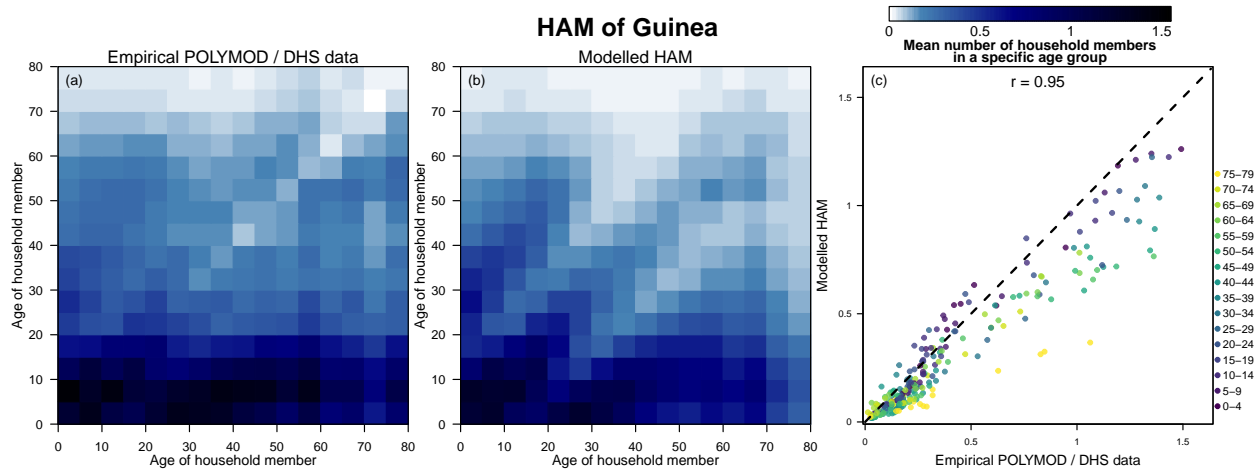



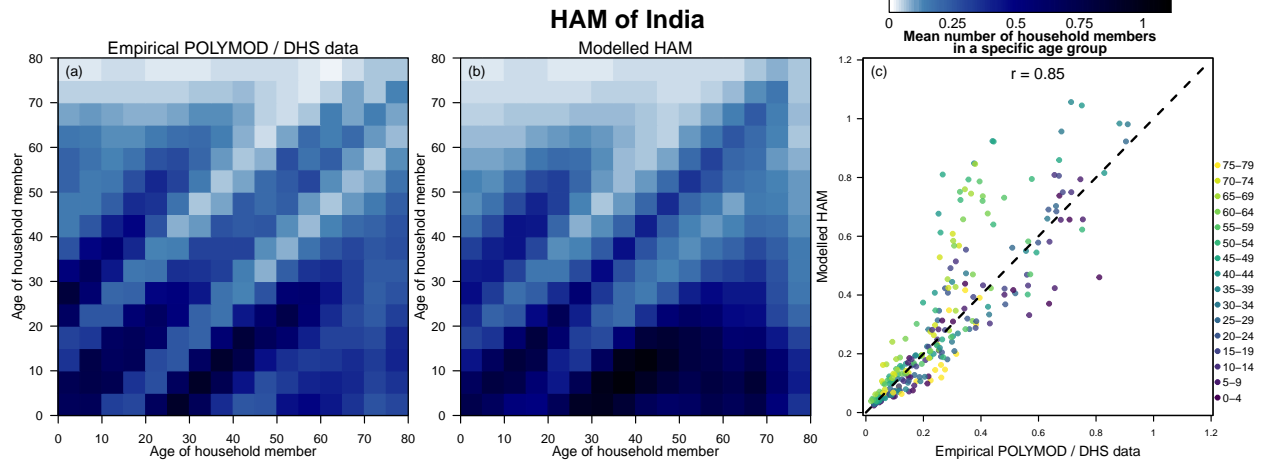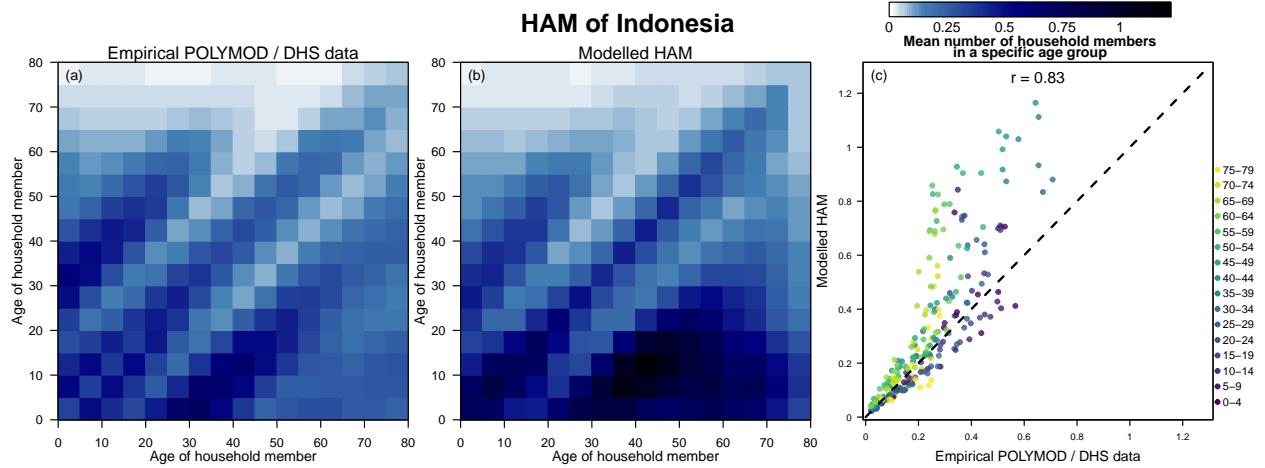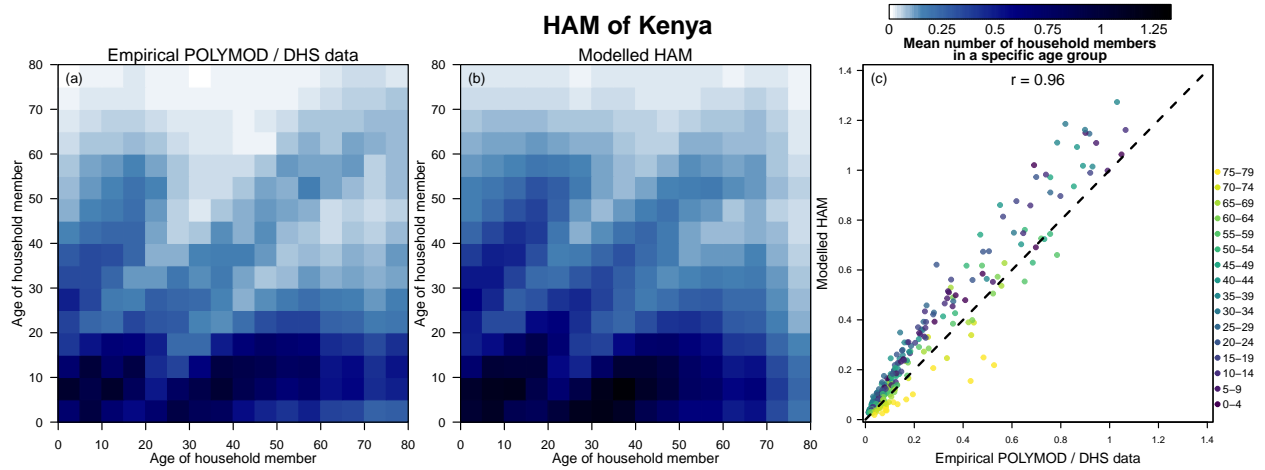

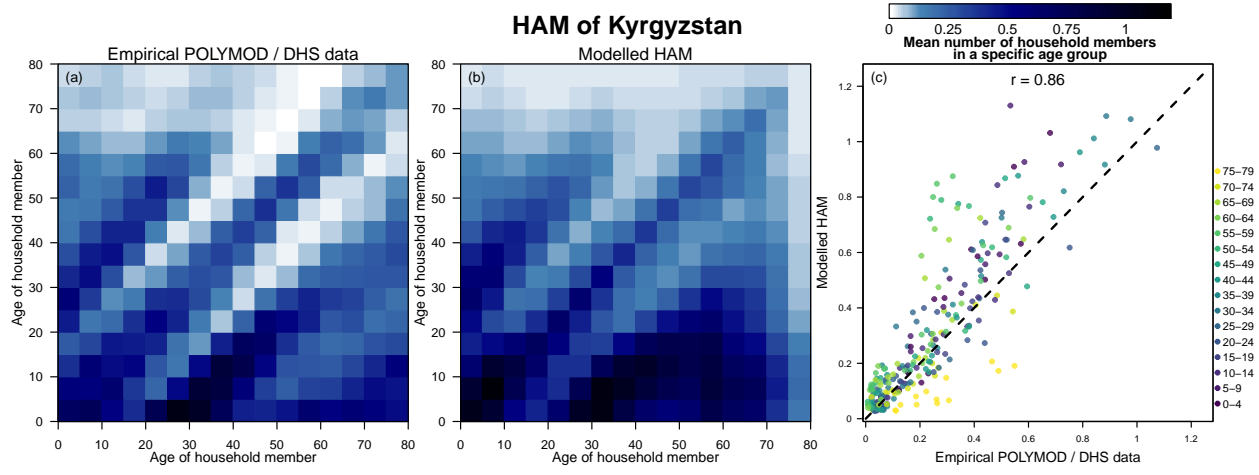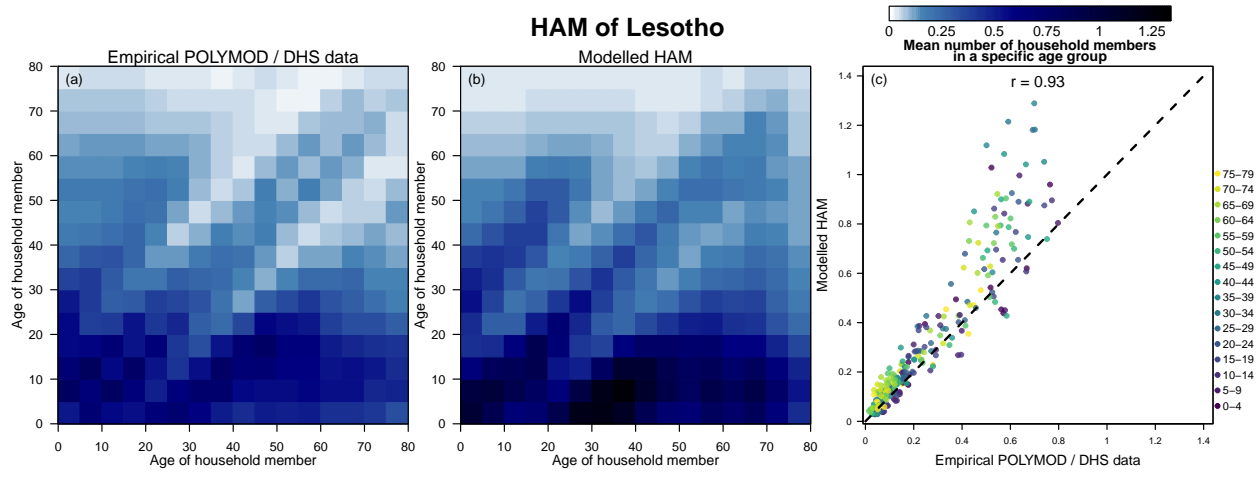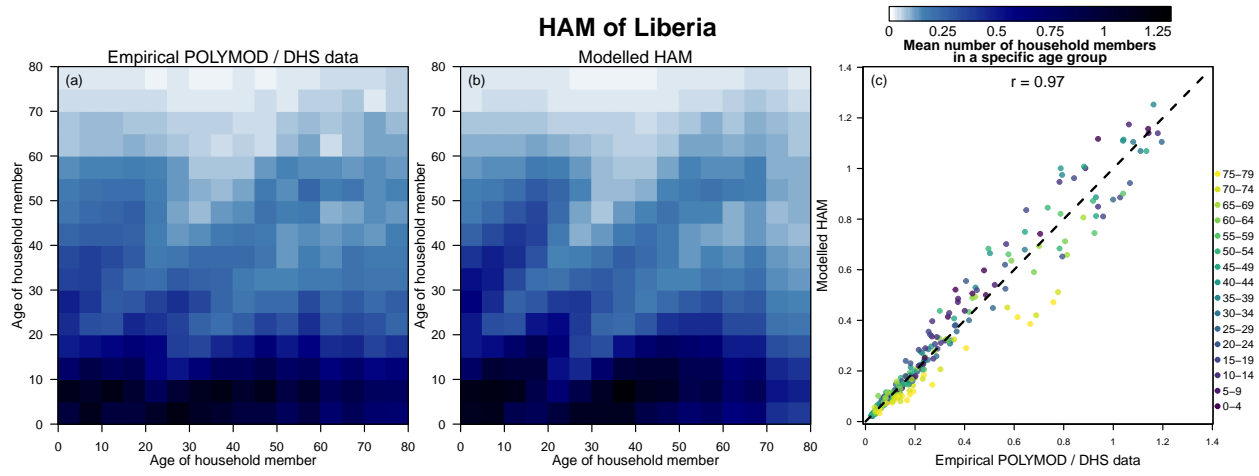

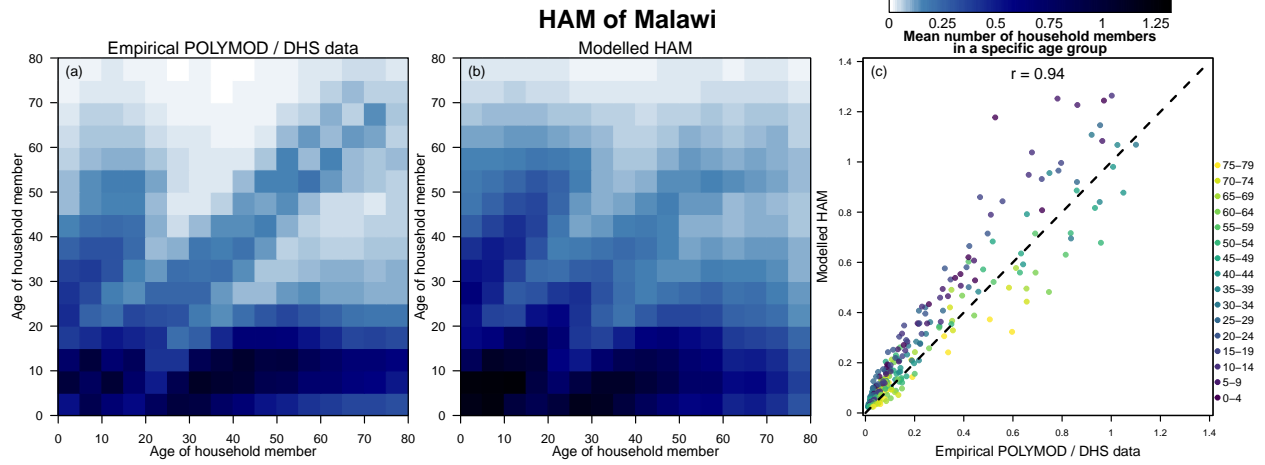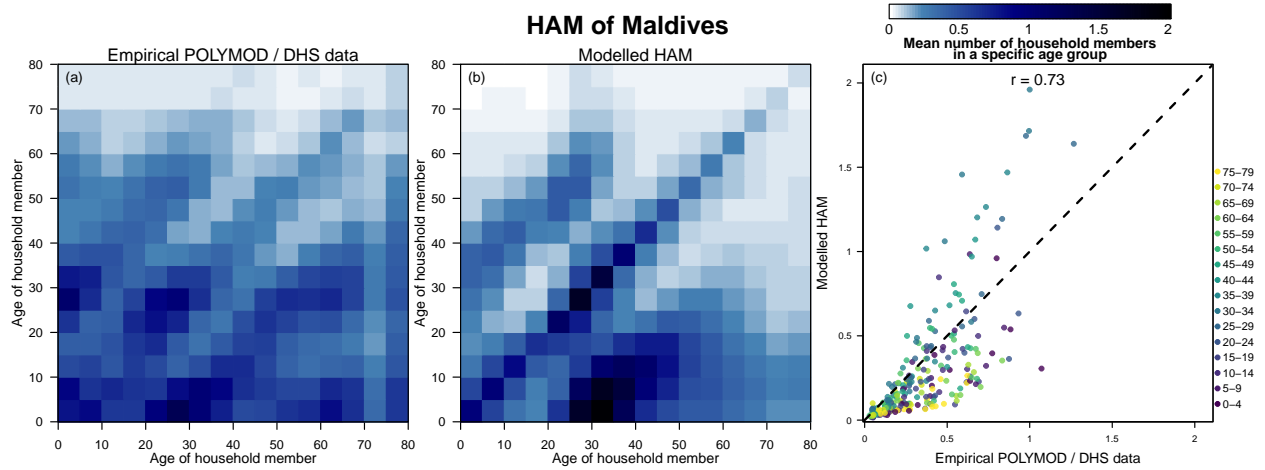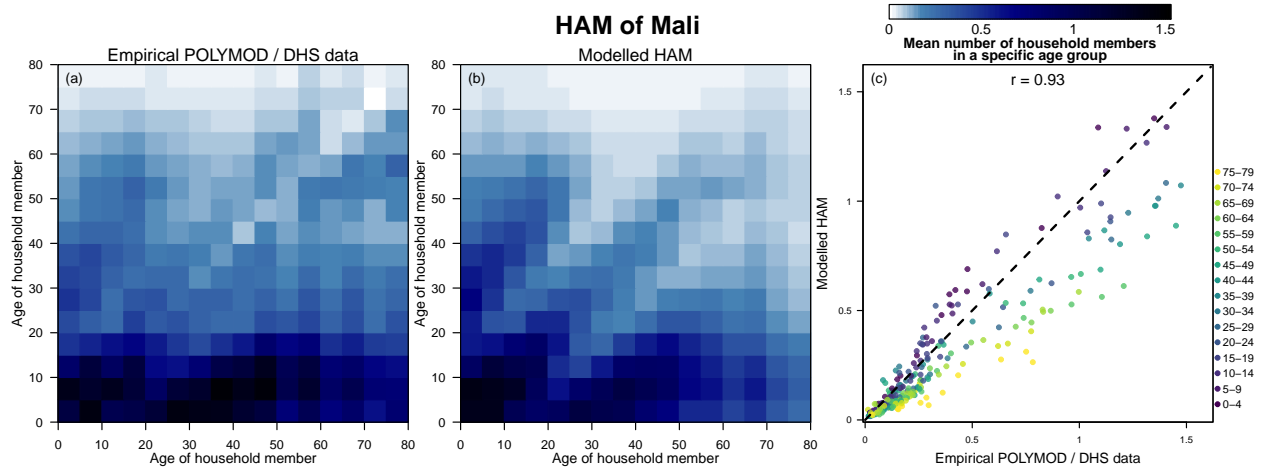

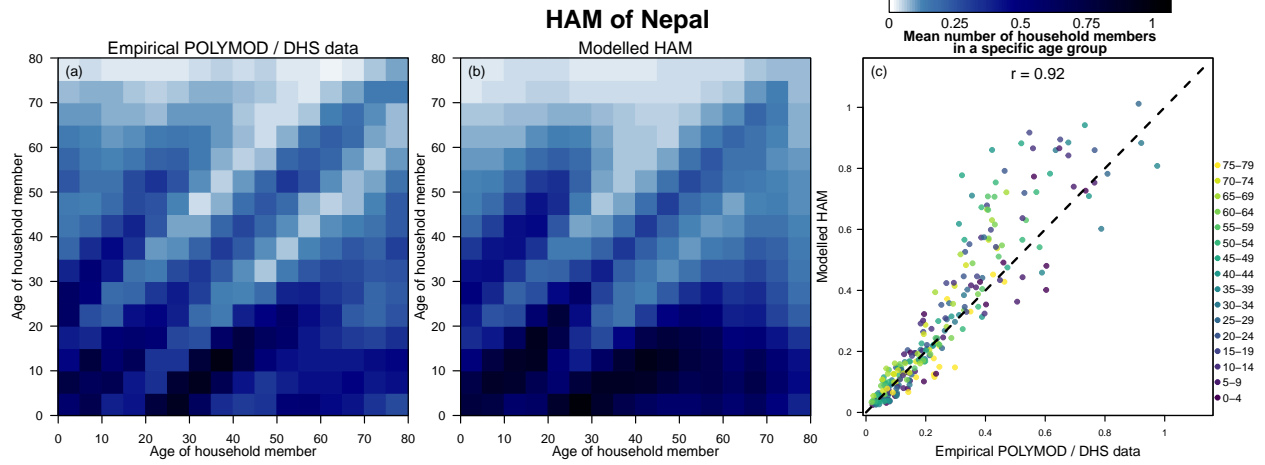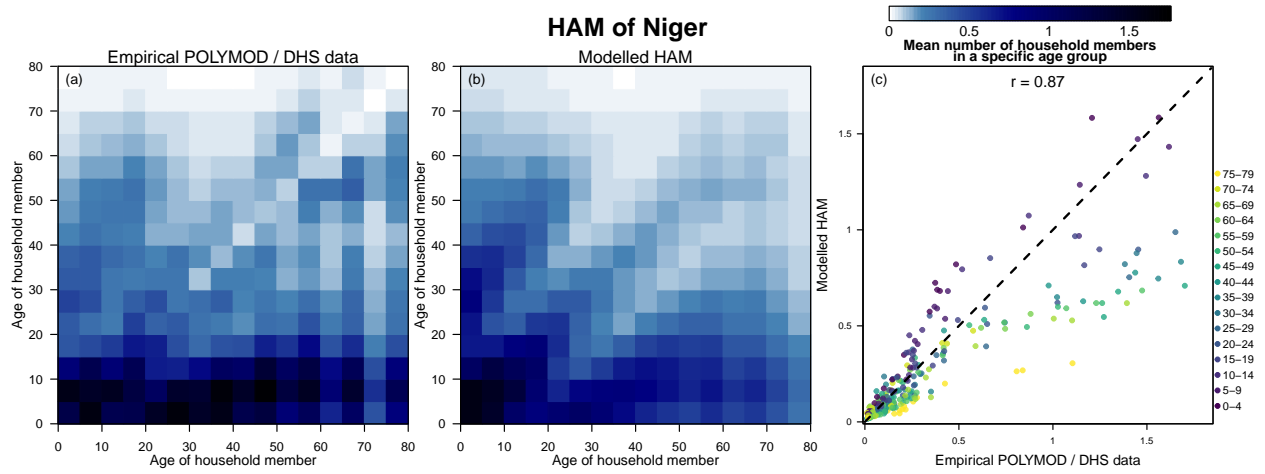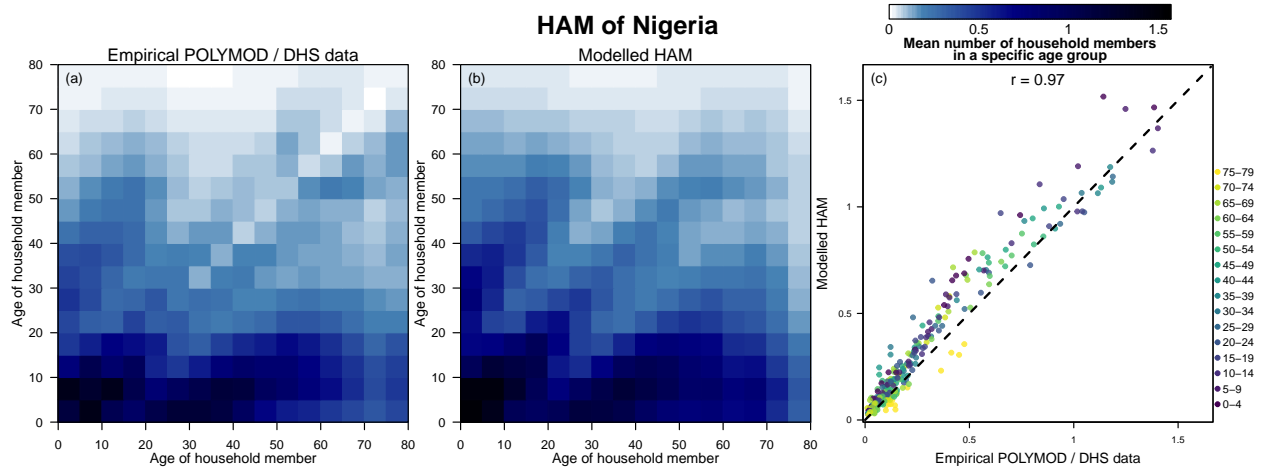

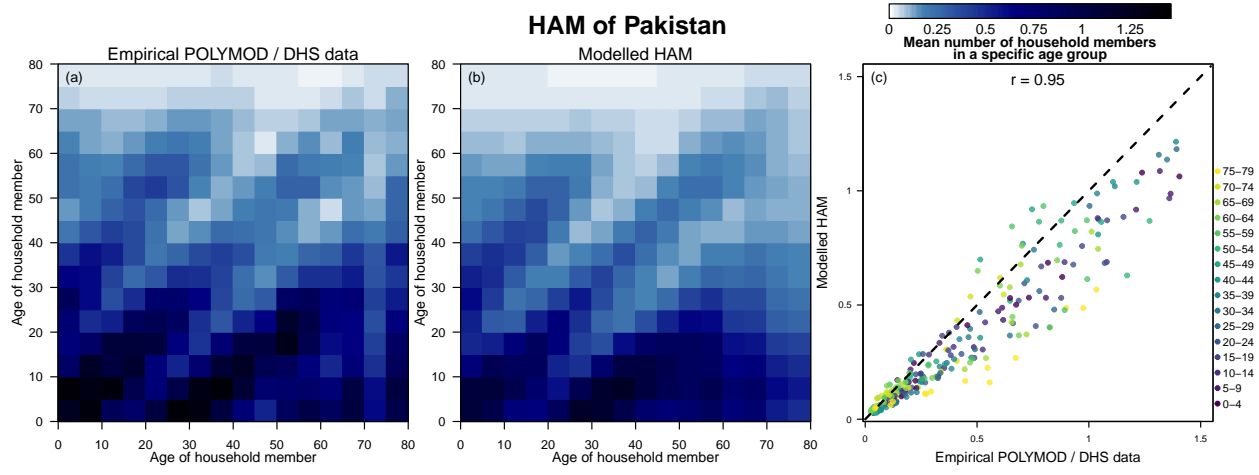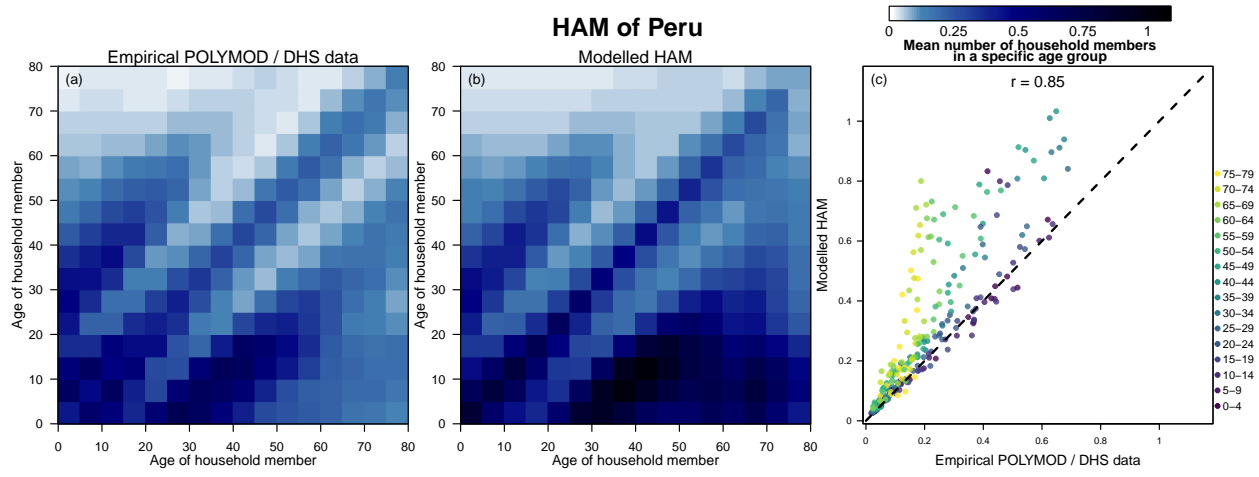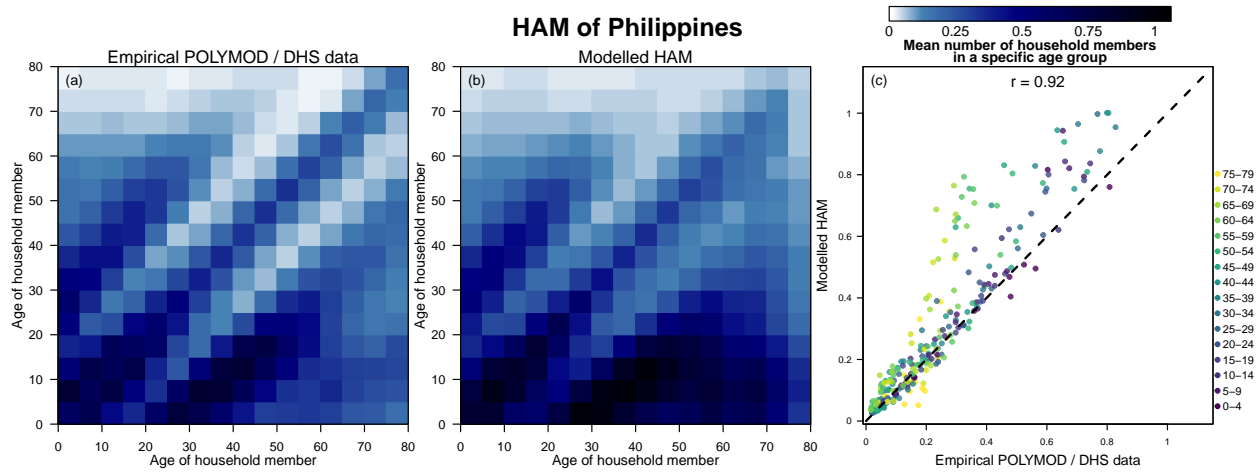



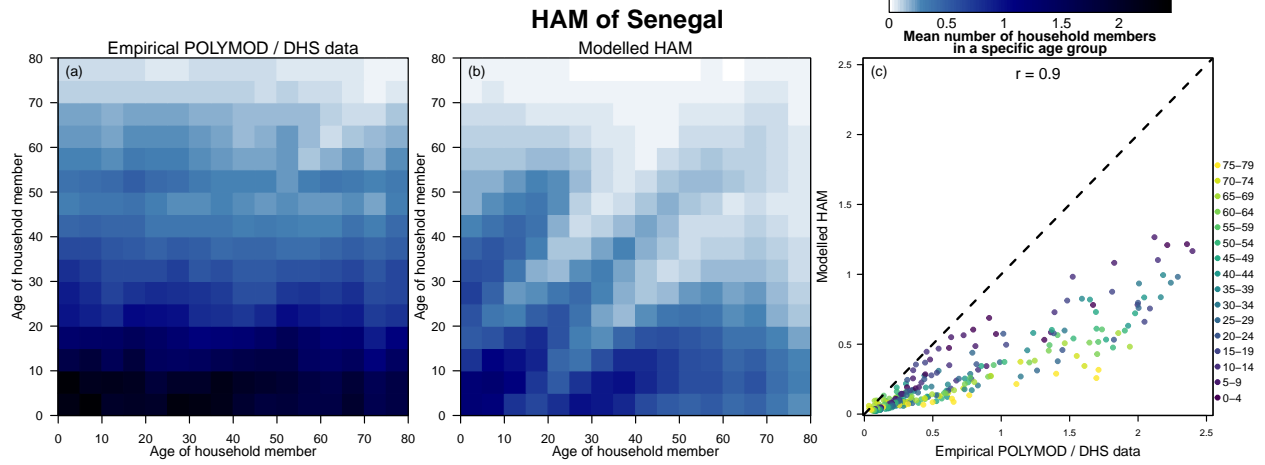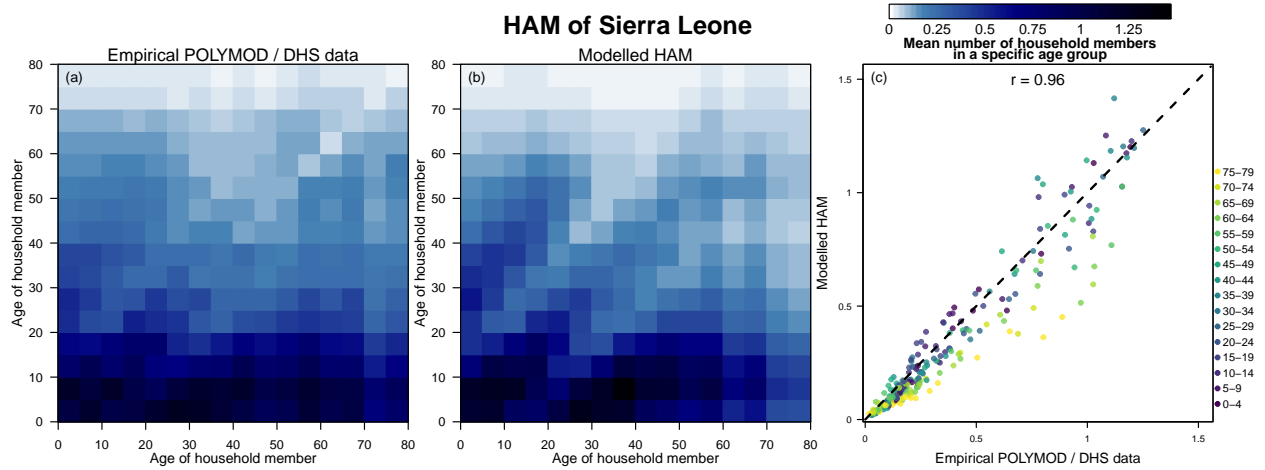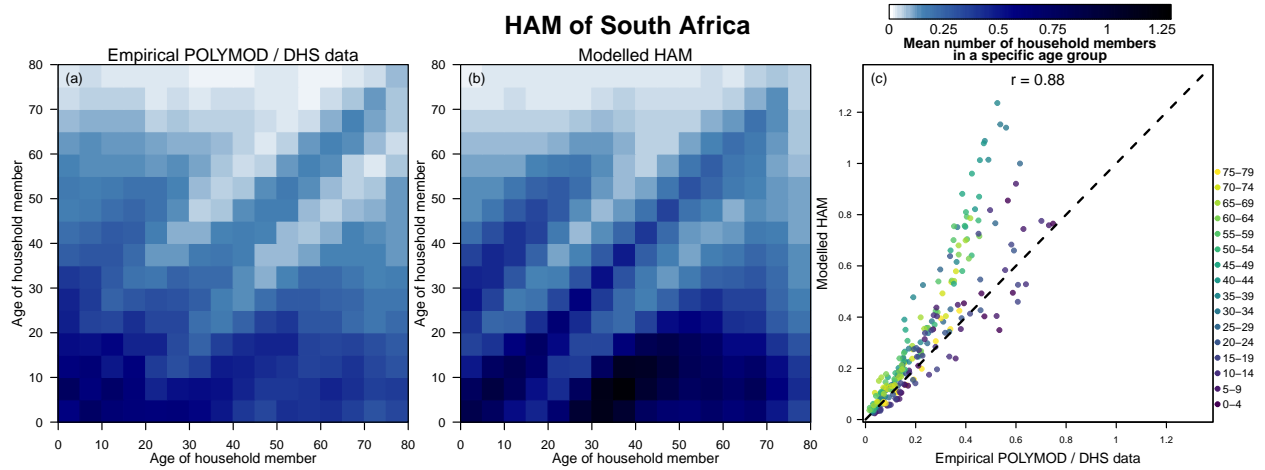

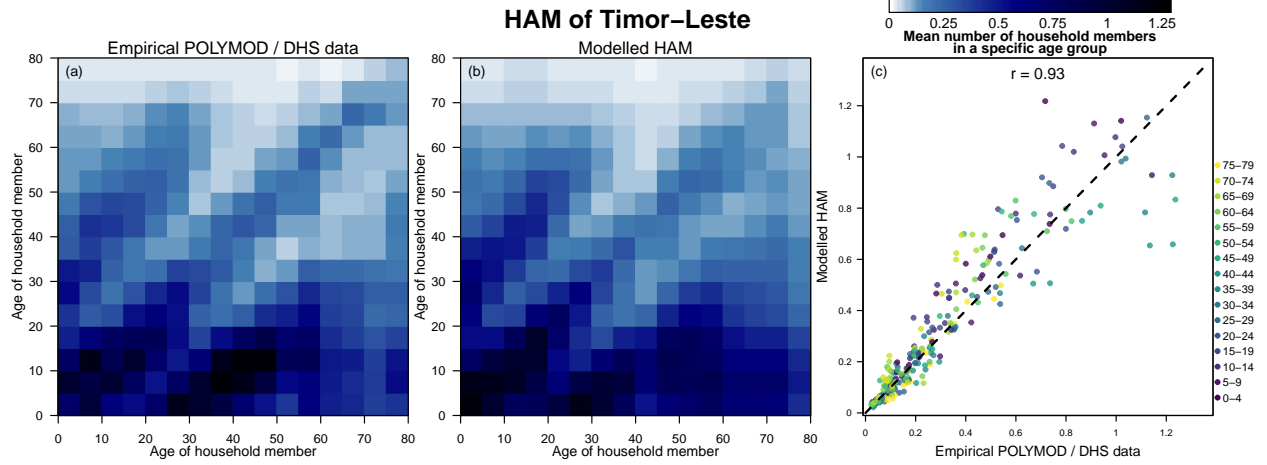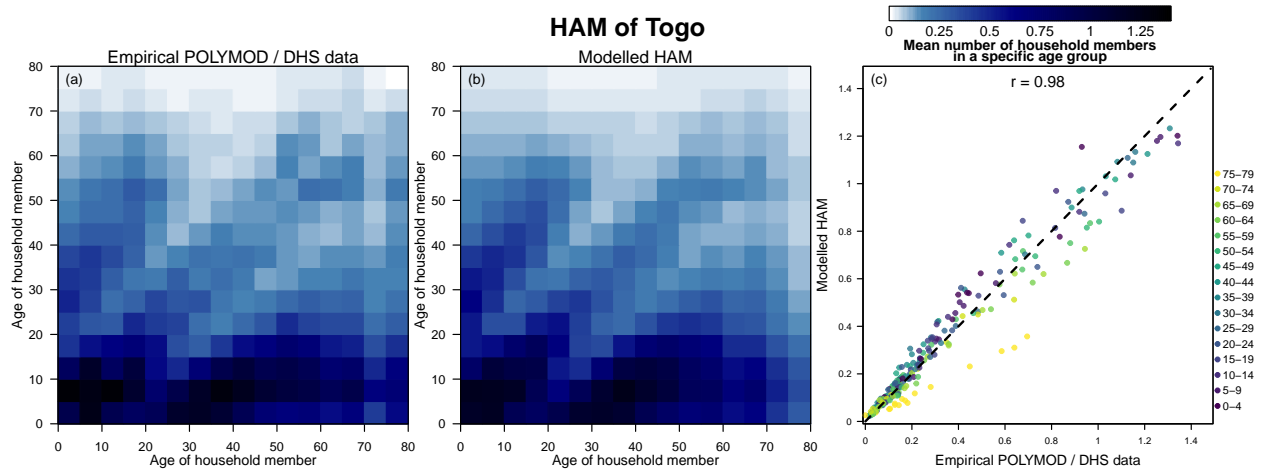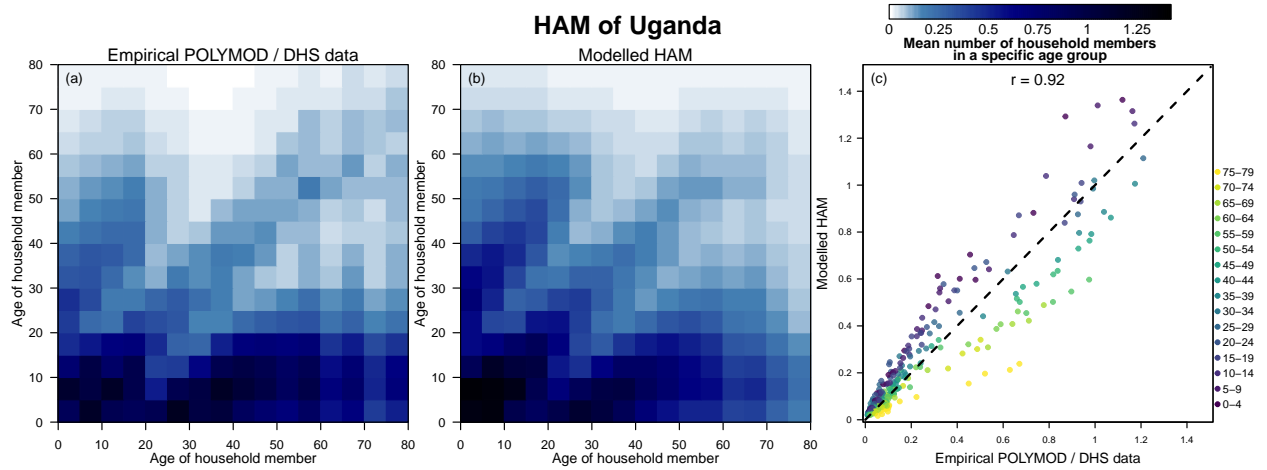

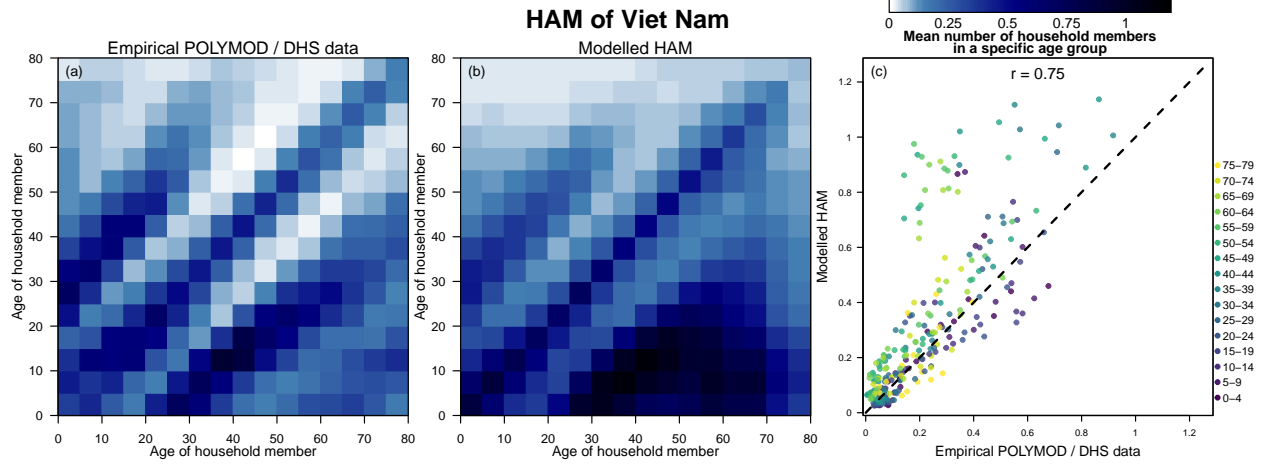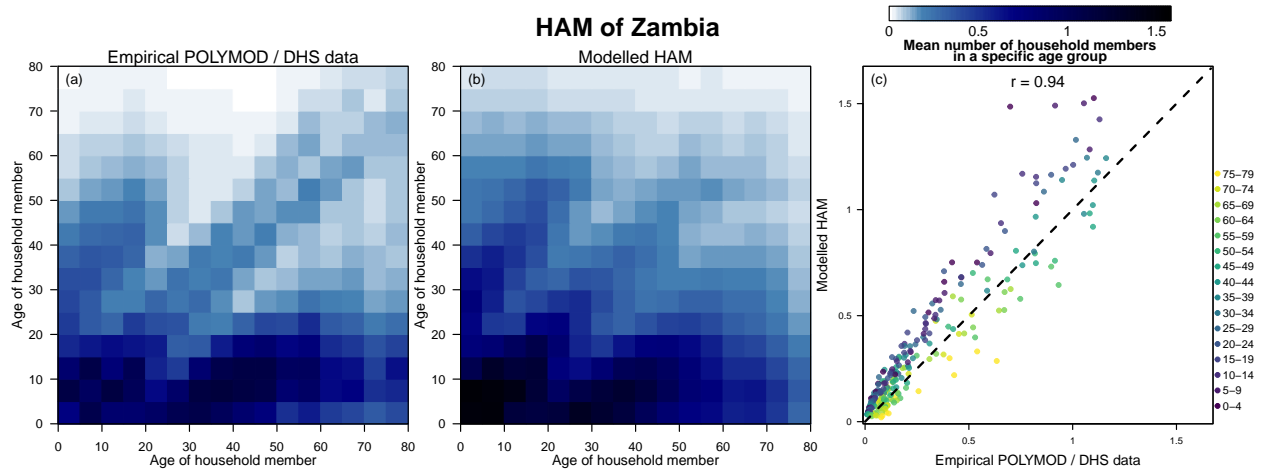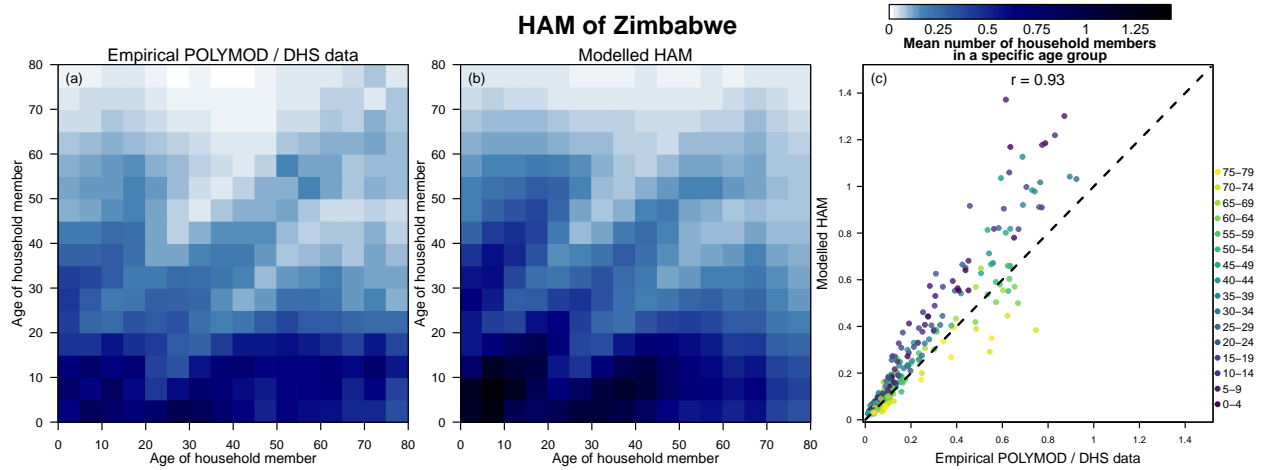

## 2.2 Household age matrix (HAM) urban and rural comparison

Using rural-urban stratified population and household data, we present the population age compositions and household age matrices for rural and urban areas by the rural and urban subregions for countries with recent DHS household surveys.

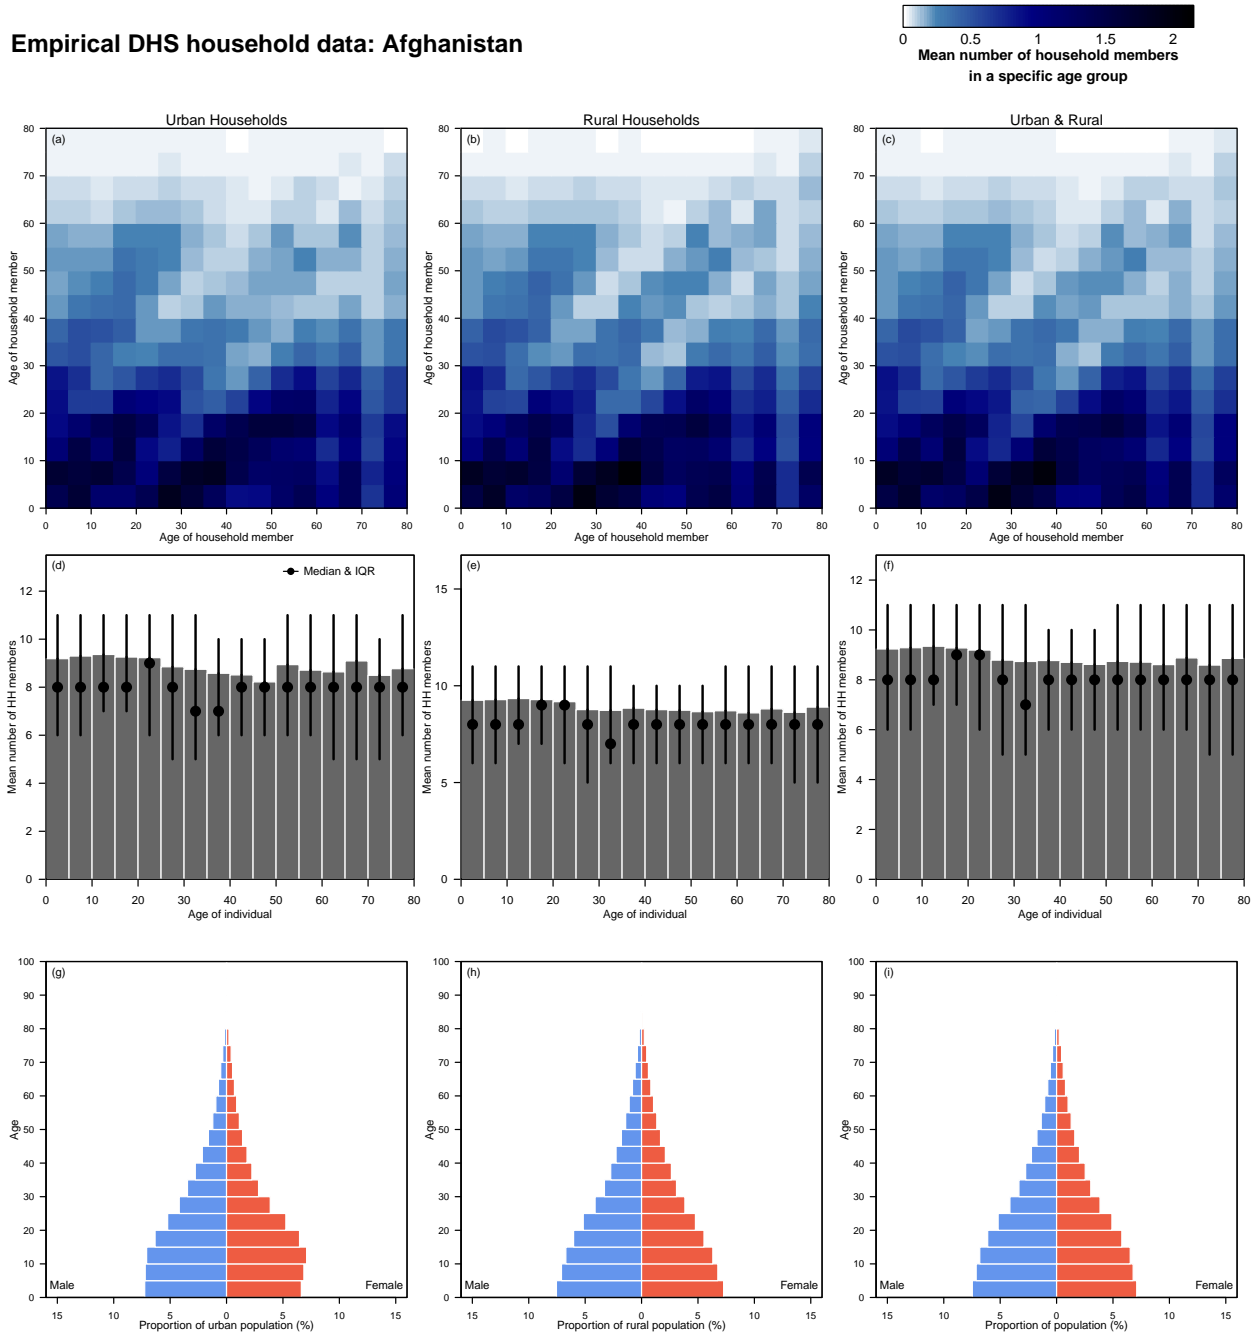

# Empirical DHS household data: Angola

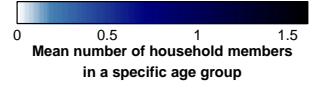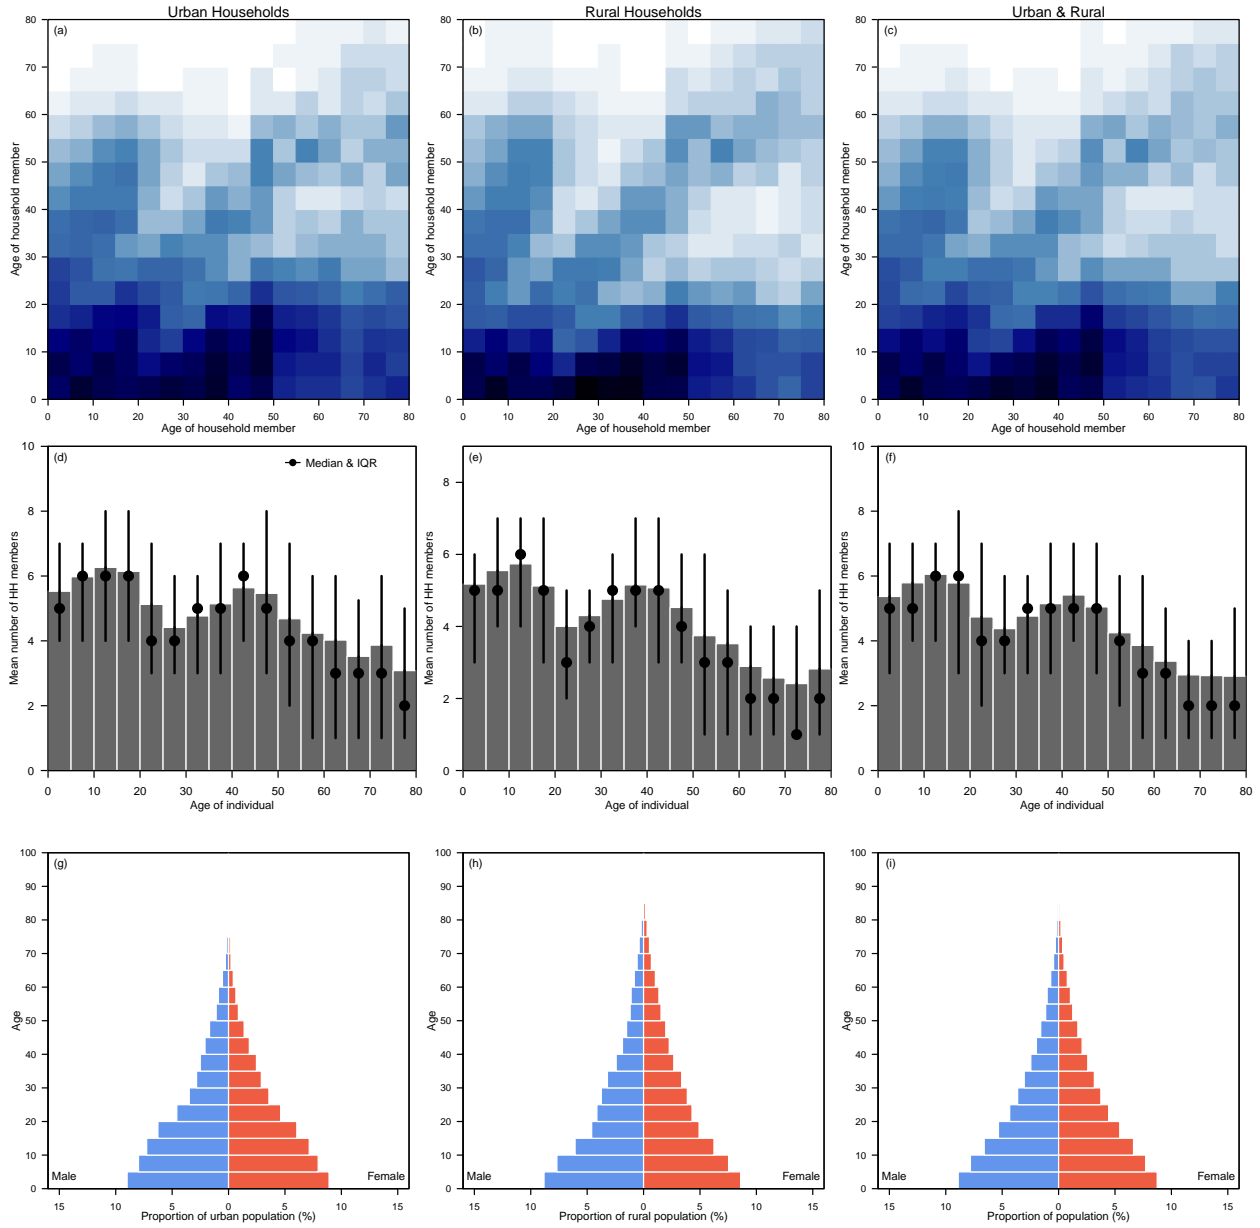

# Empirical DHS household data: Bangladesh

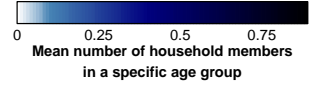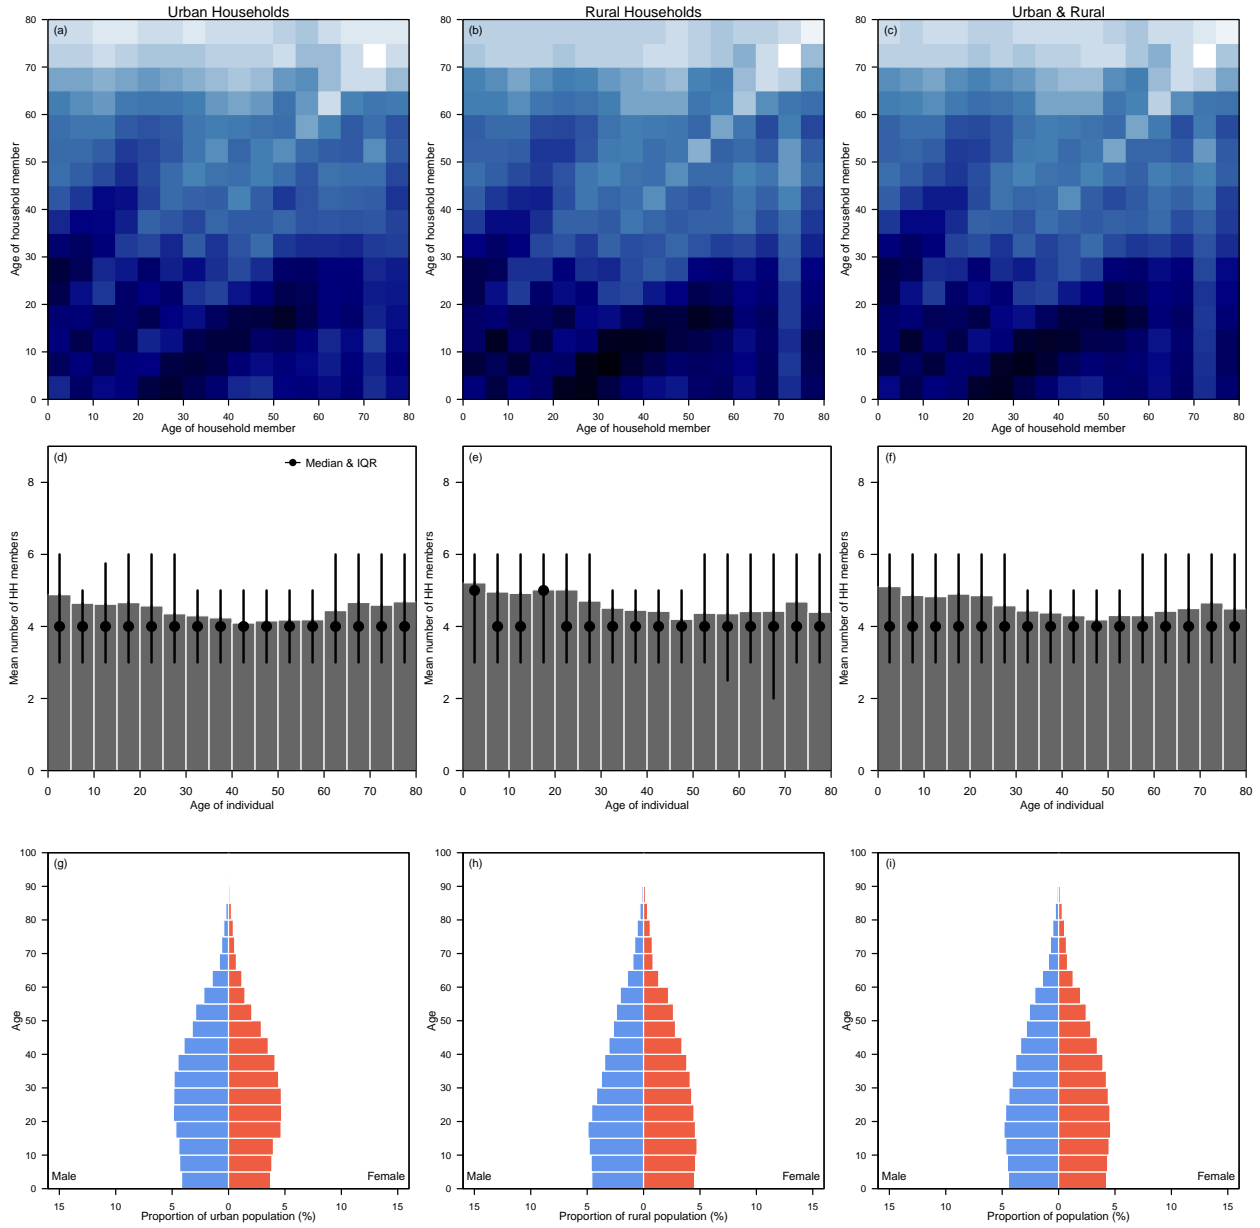

# Empirical DHS household data: Benin

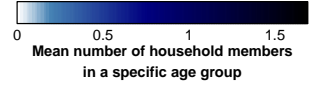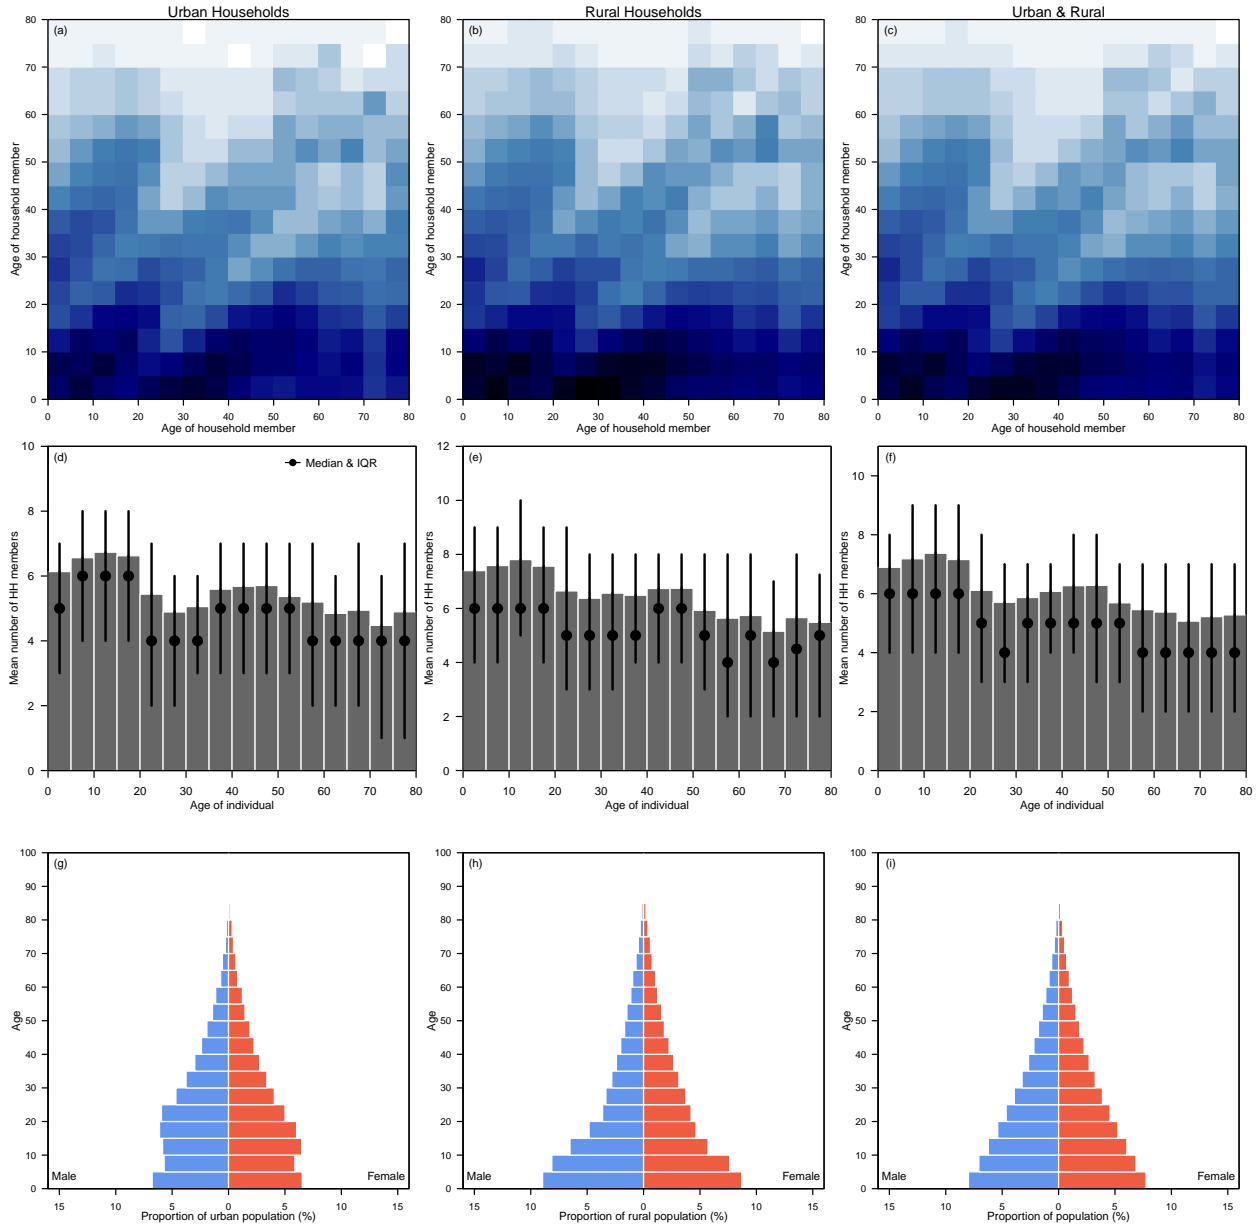

# Empirical DHS household data: Bolivia (Plurinational State of)

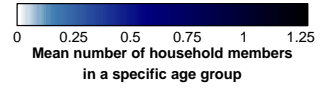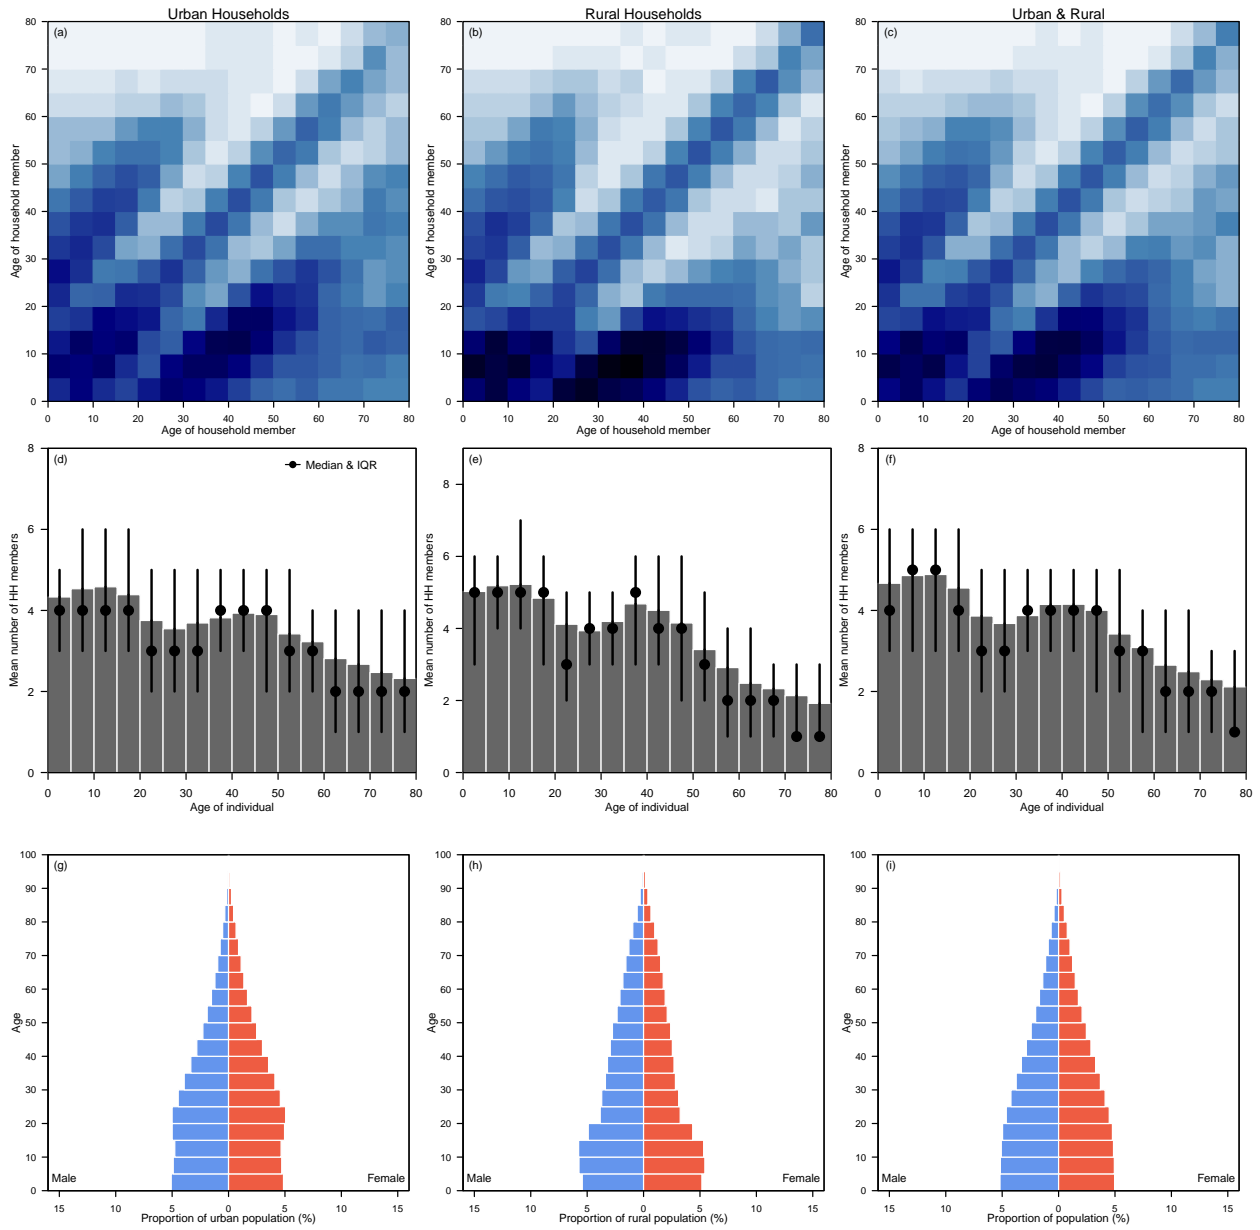



# Empirical DHS household data: Cambodia

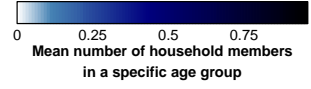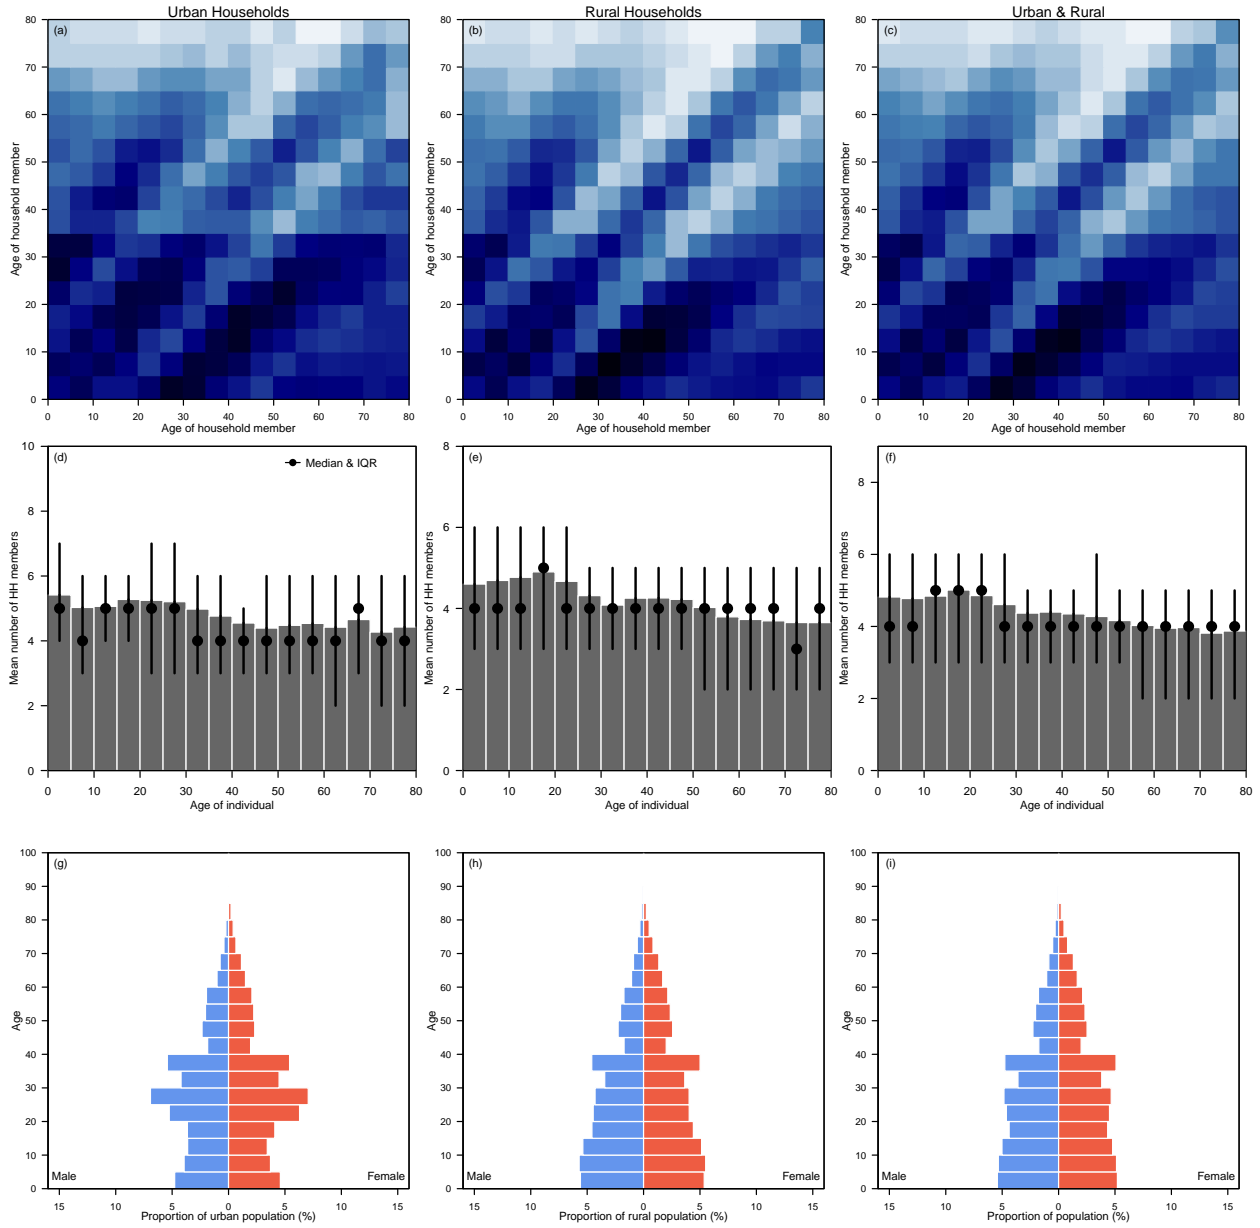

# Empirical DHS household data: Cameroon

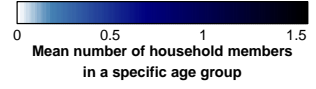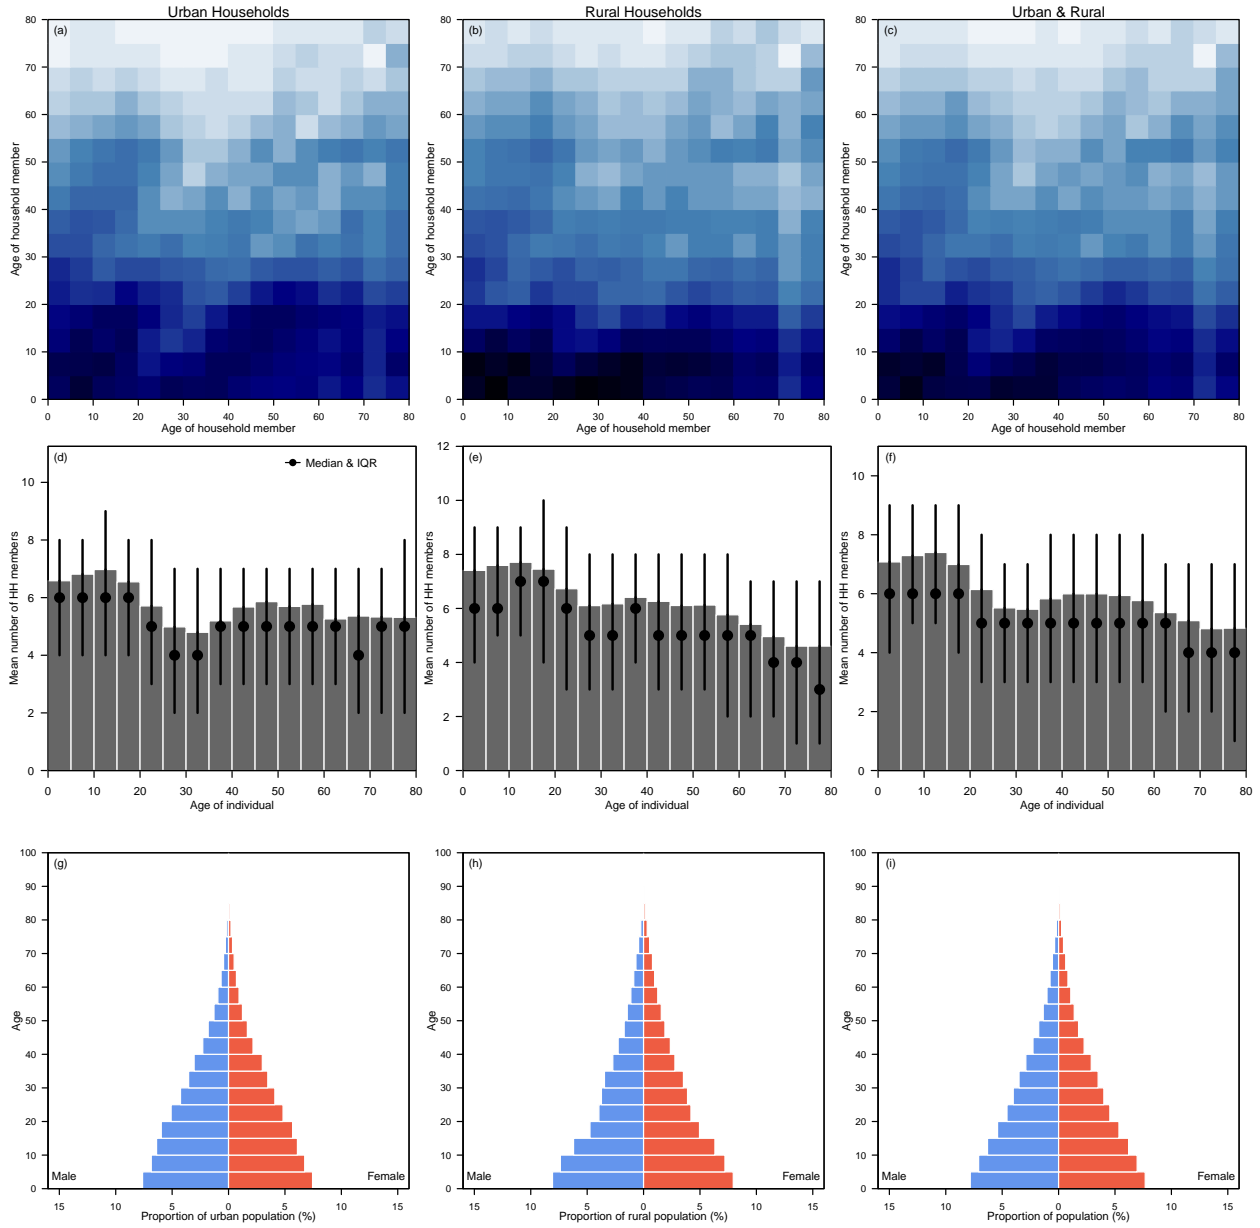

Empirical DHS household data: Chad

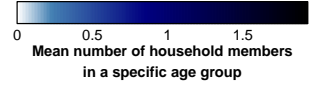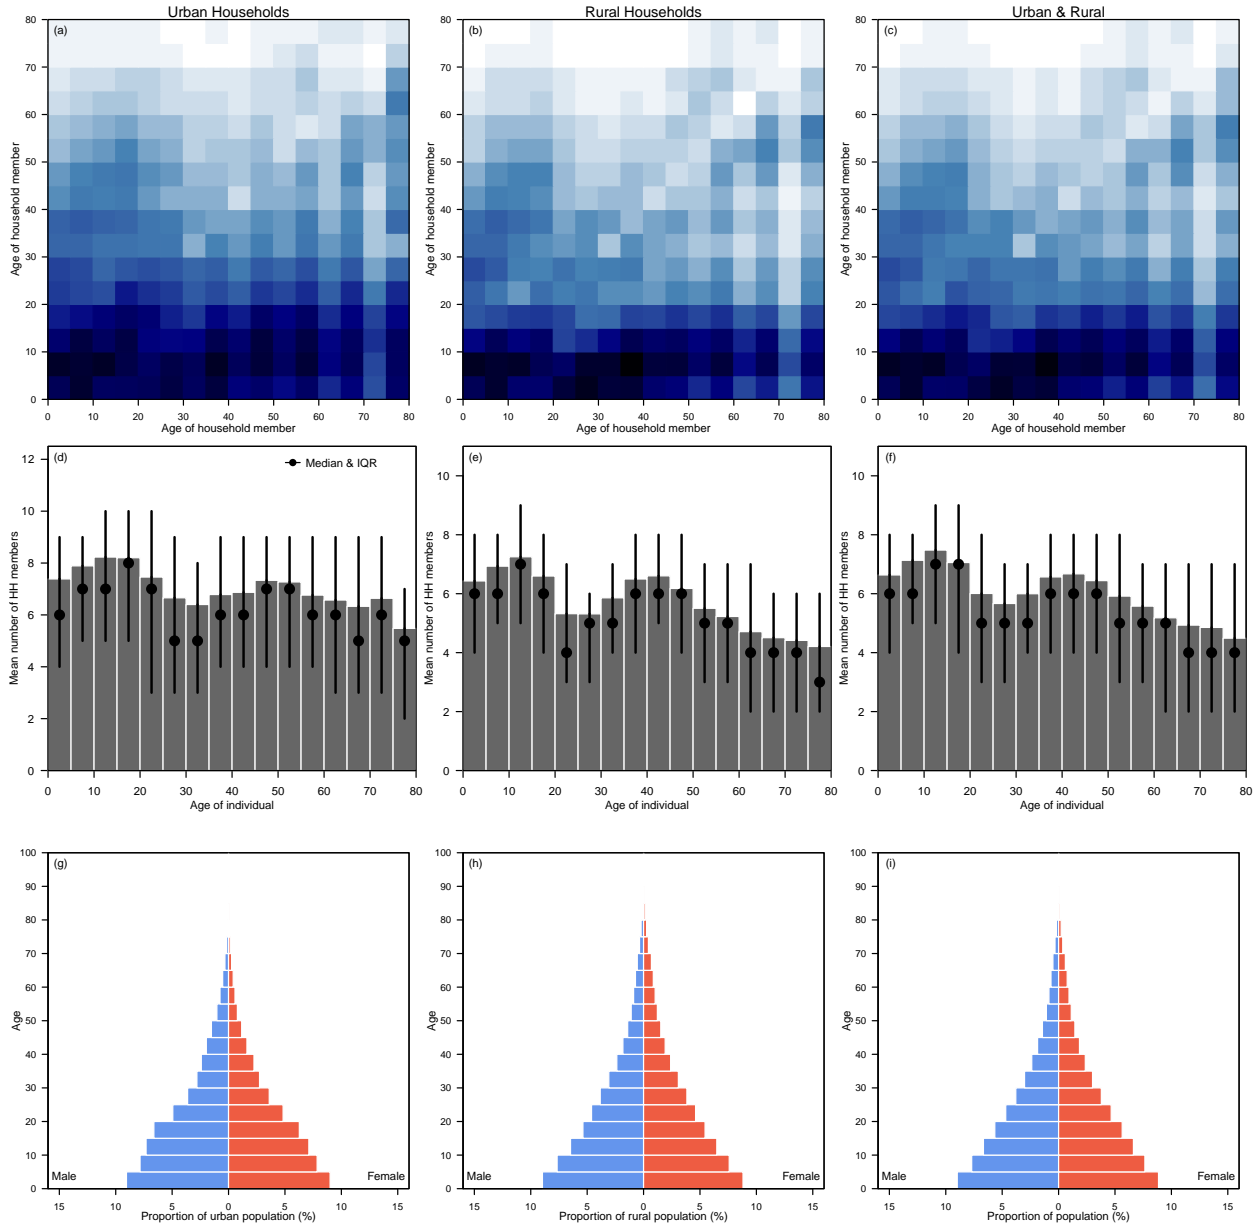

# Empirical DHS household data: Colombia

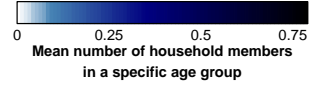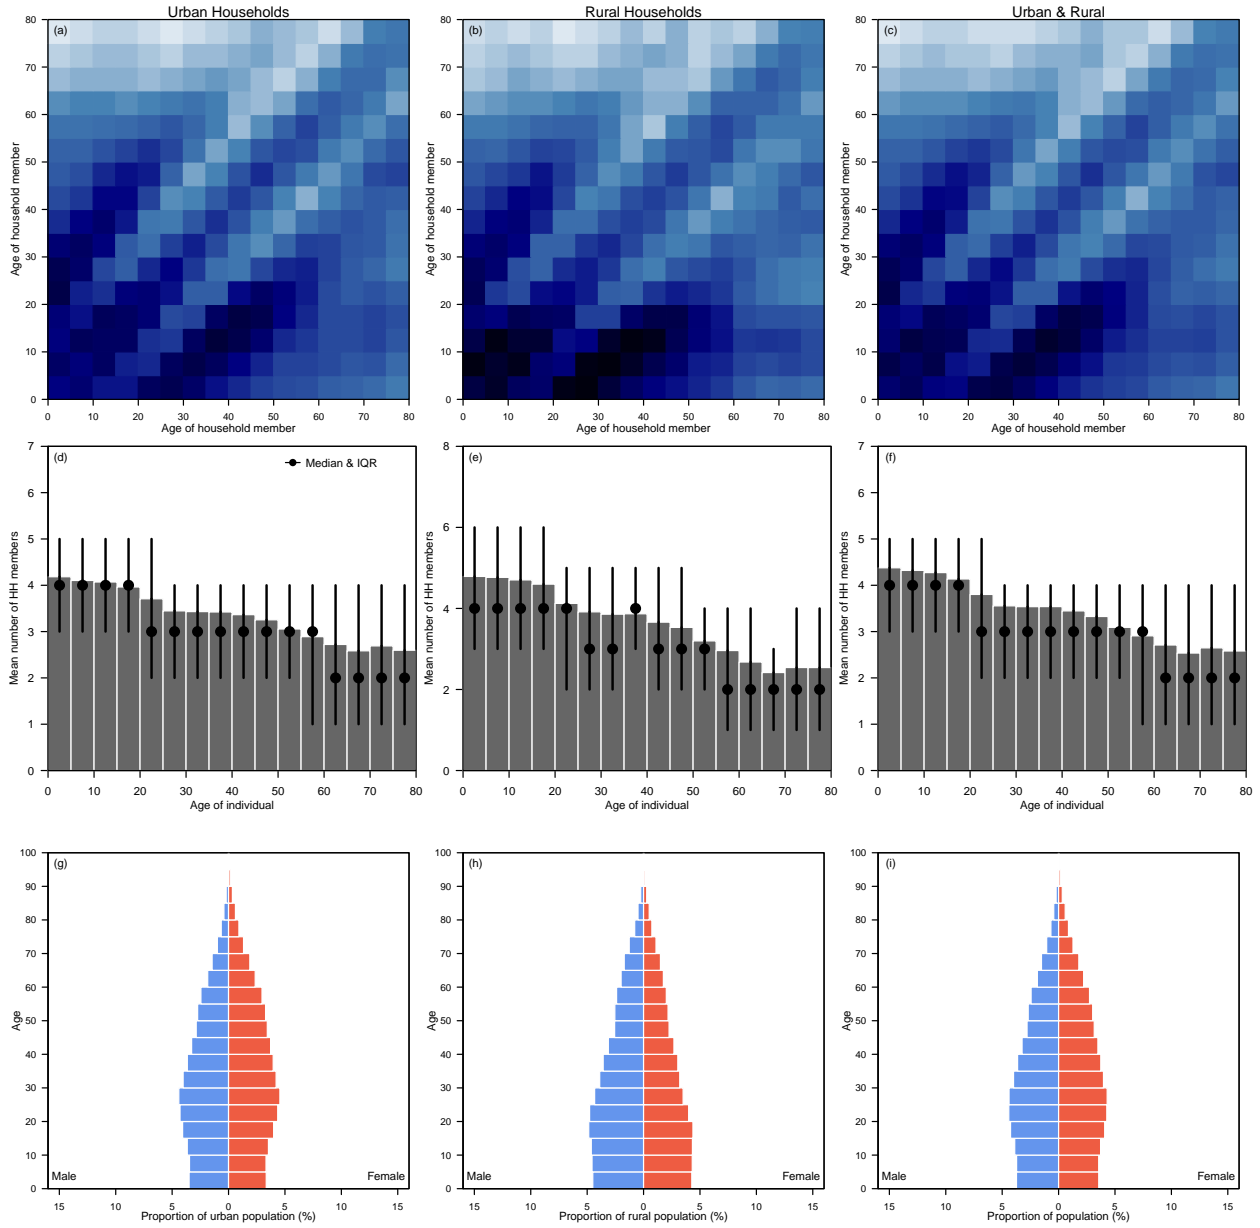

# Empirical DHS household data: Congo

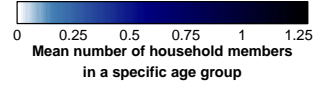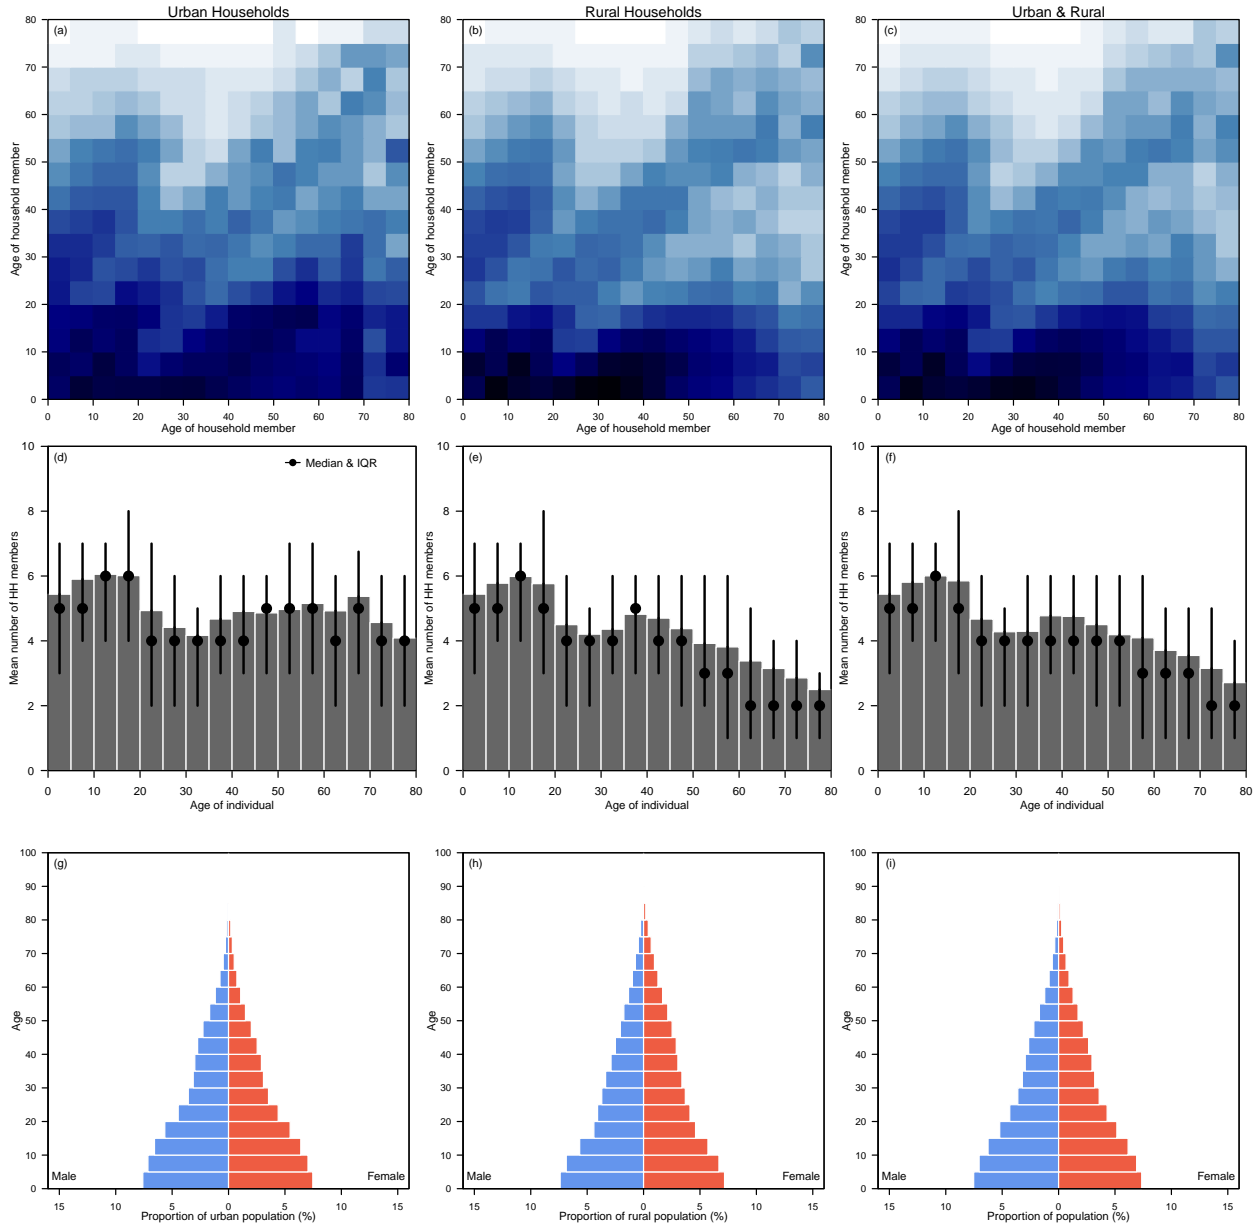

# Empirical DHS household data: Democratic Republic of the Congo

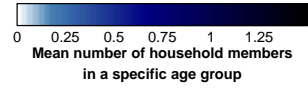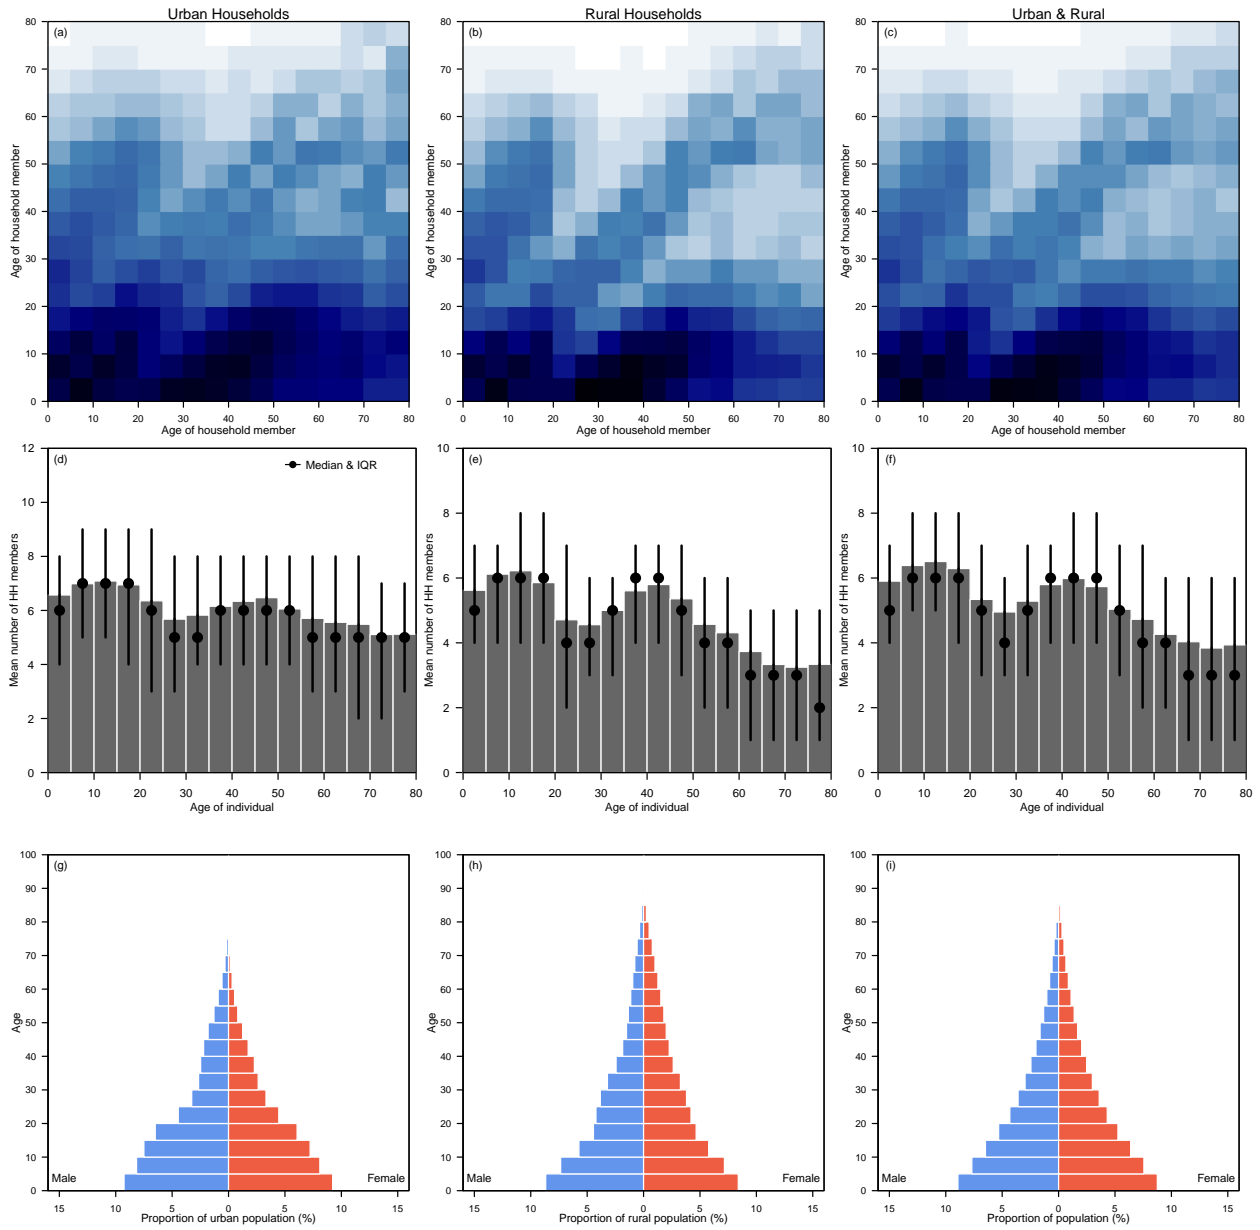



# Empirical DHS household data: Ethiopia

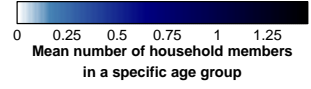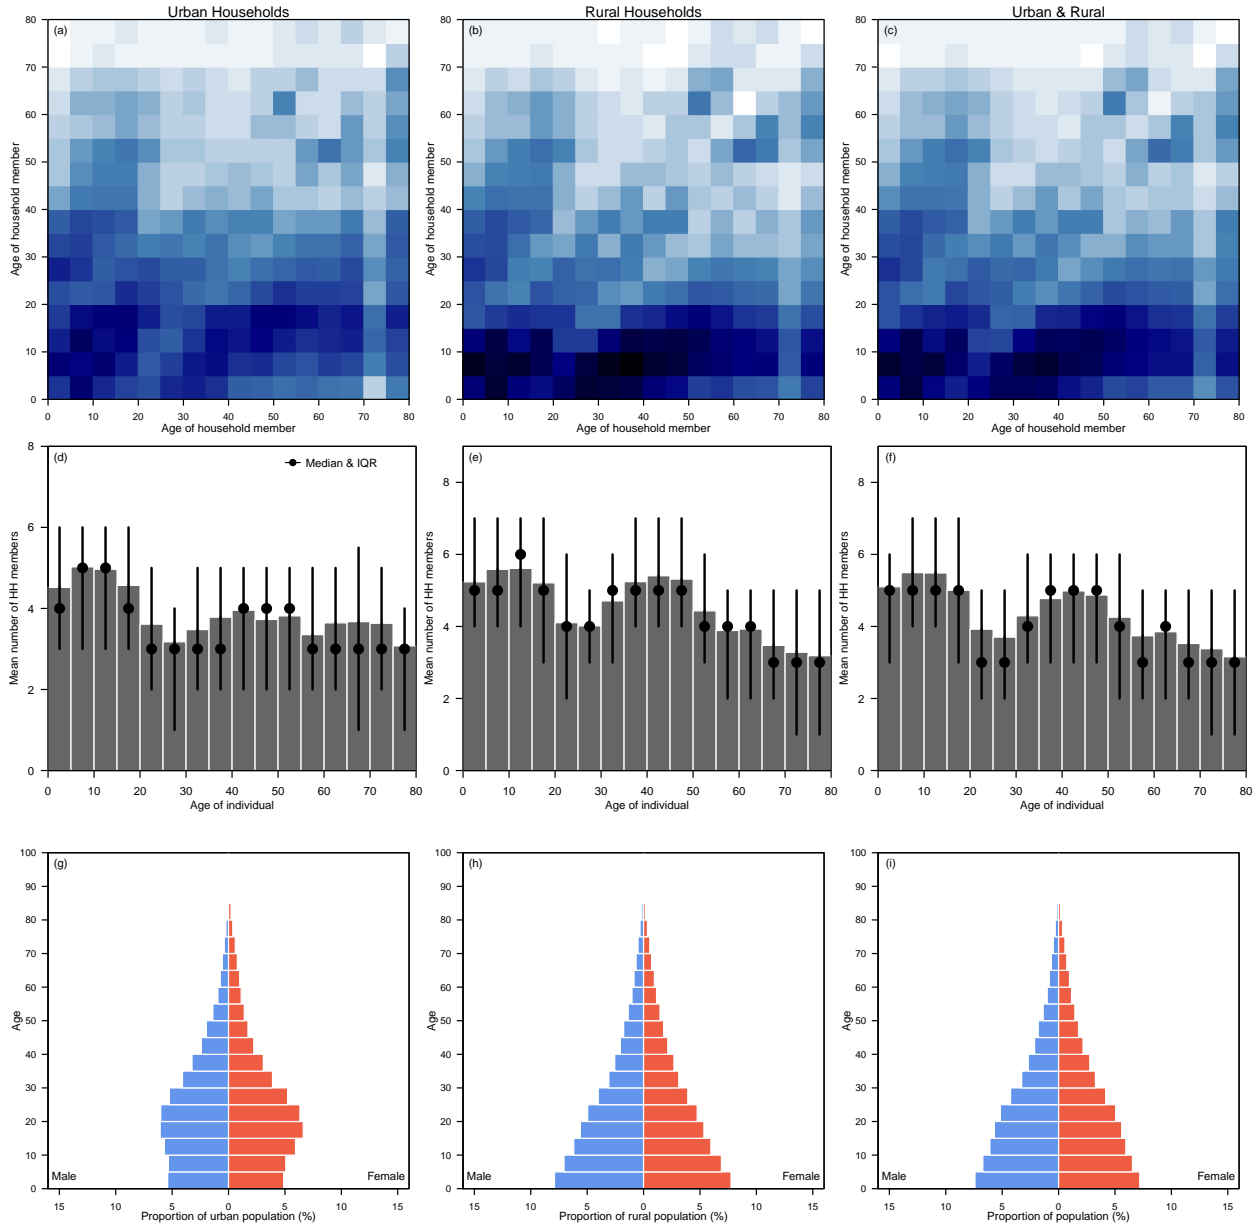



# Empirical DHS household data: Ghana

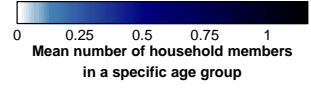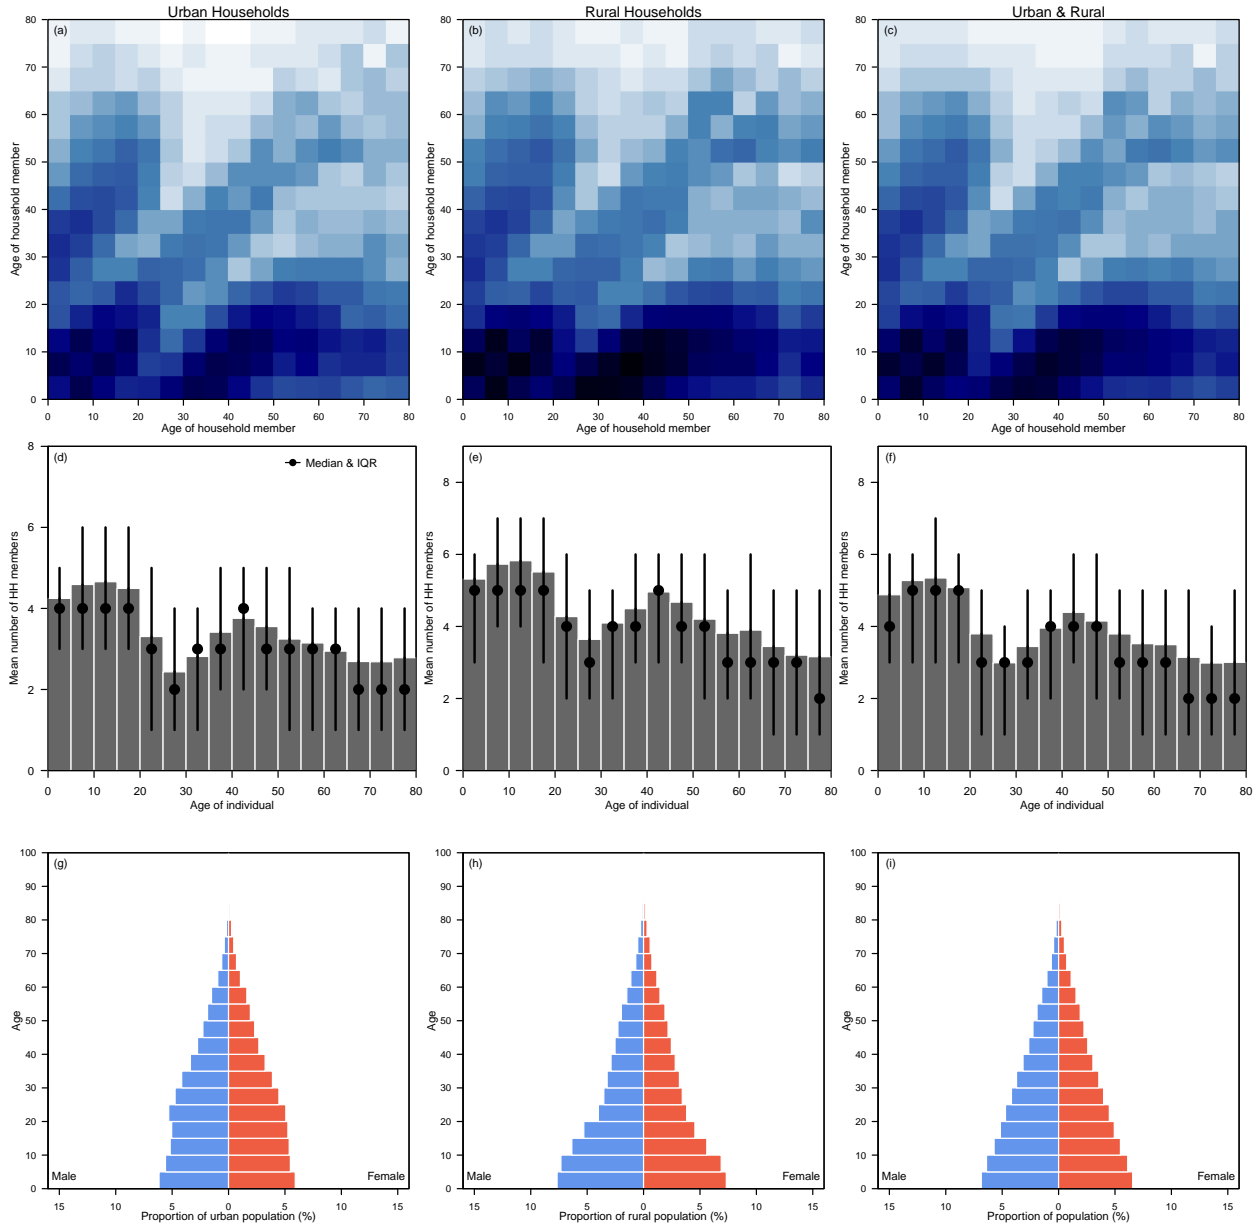

# Empirical DHS household data: Guatemala

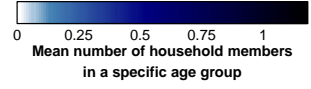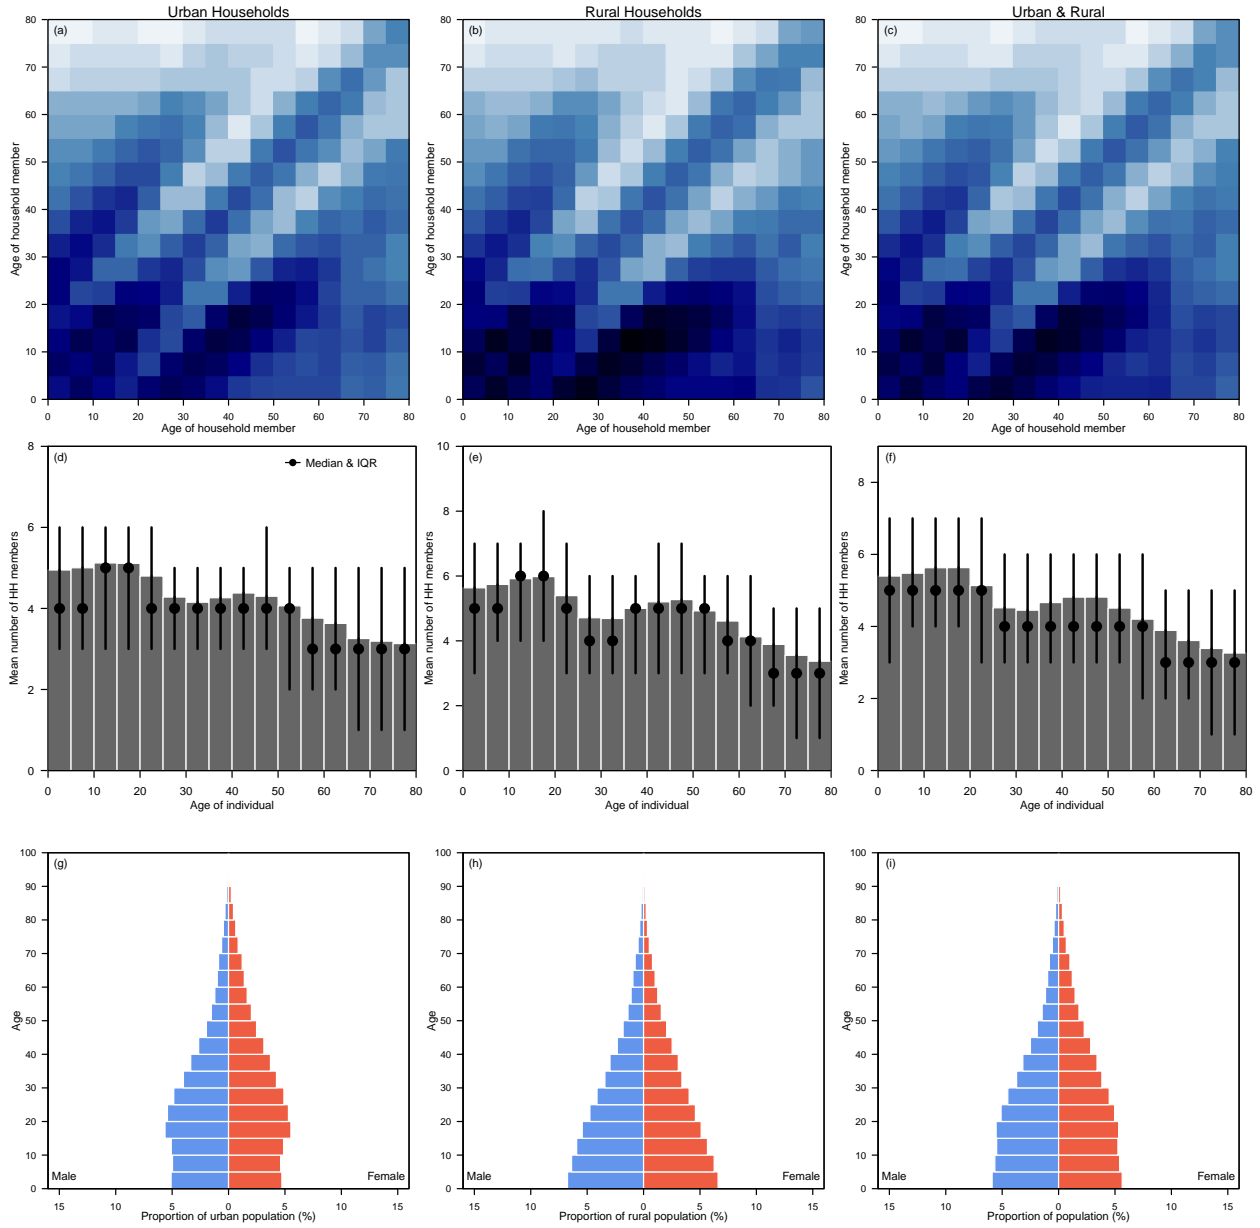

# Empirical DHS household data: Guinea

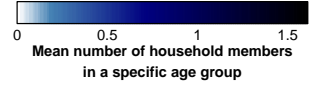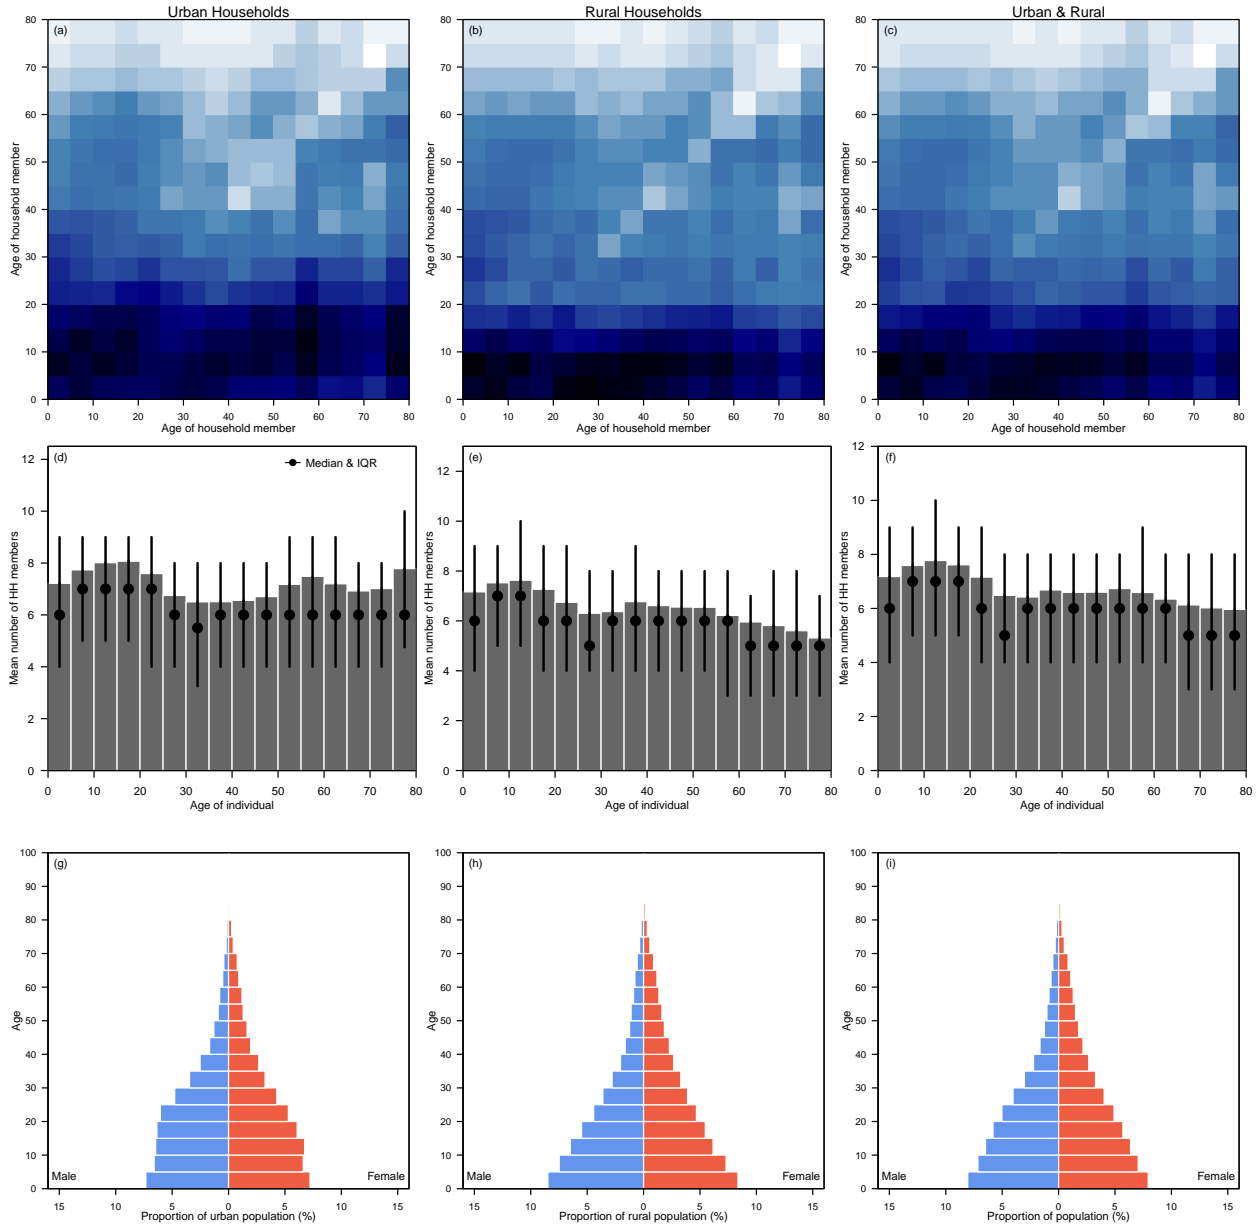

# Empirical DHS household data: Guyana

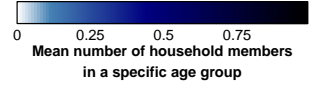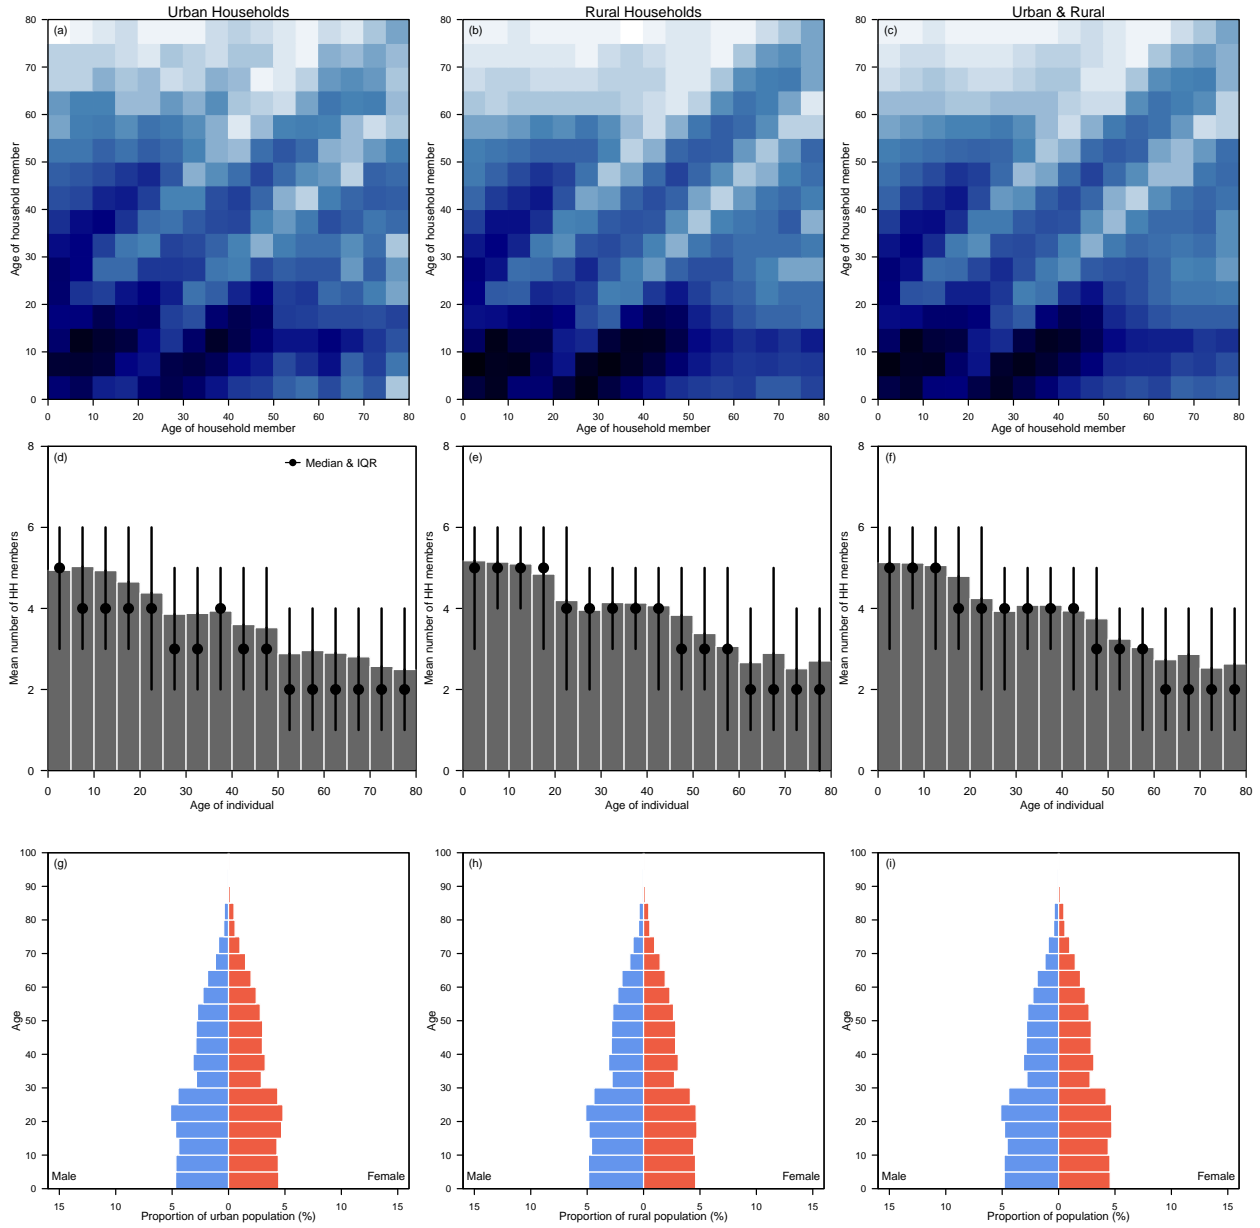

# Empirical DHS household data: Haiti

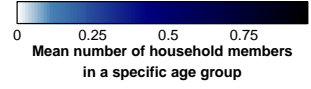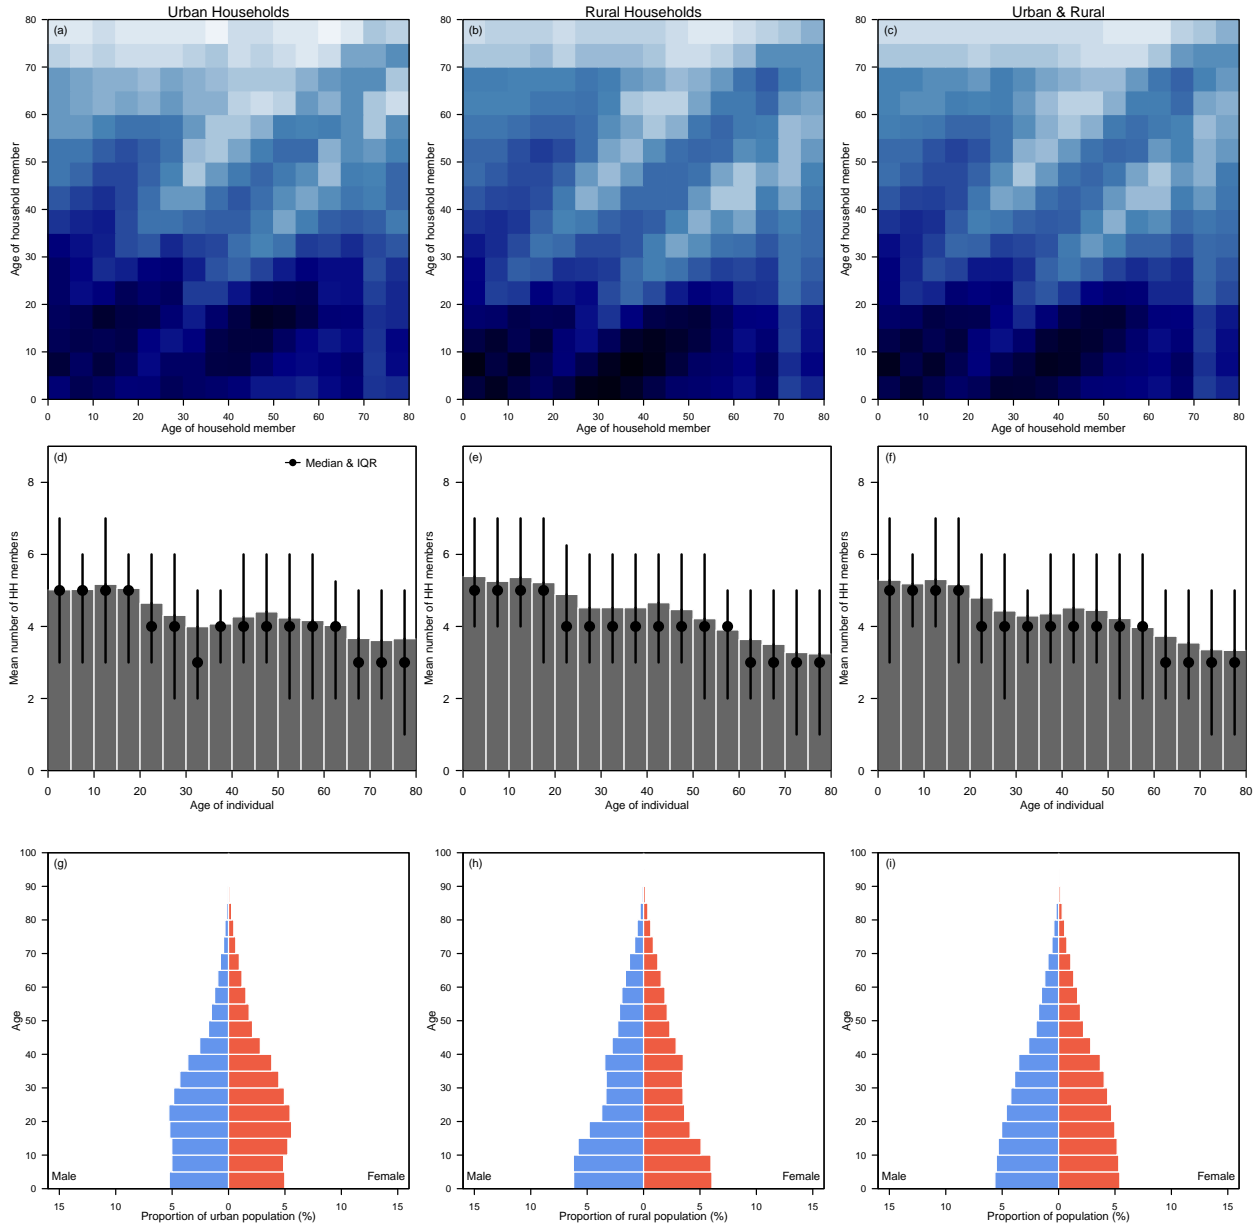

# Empirical DHS household data: Honduras

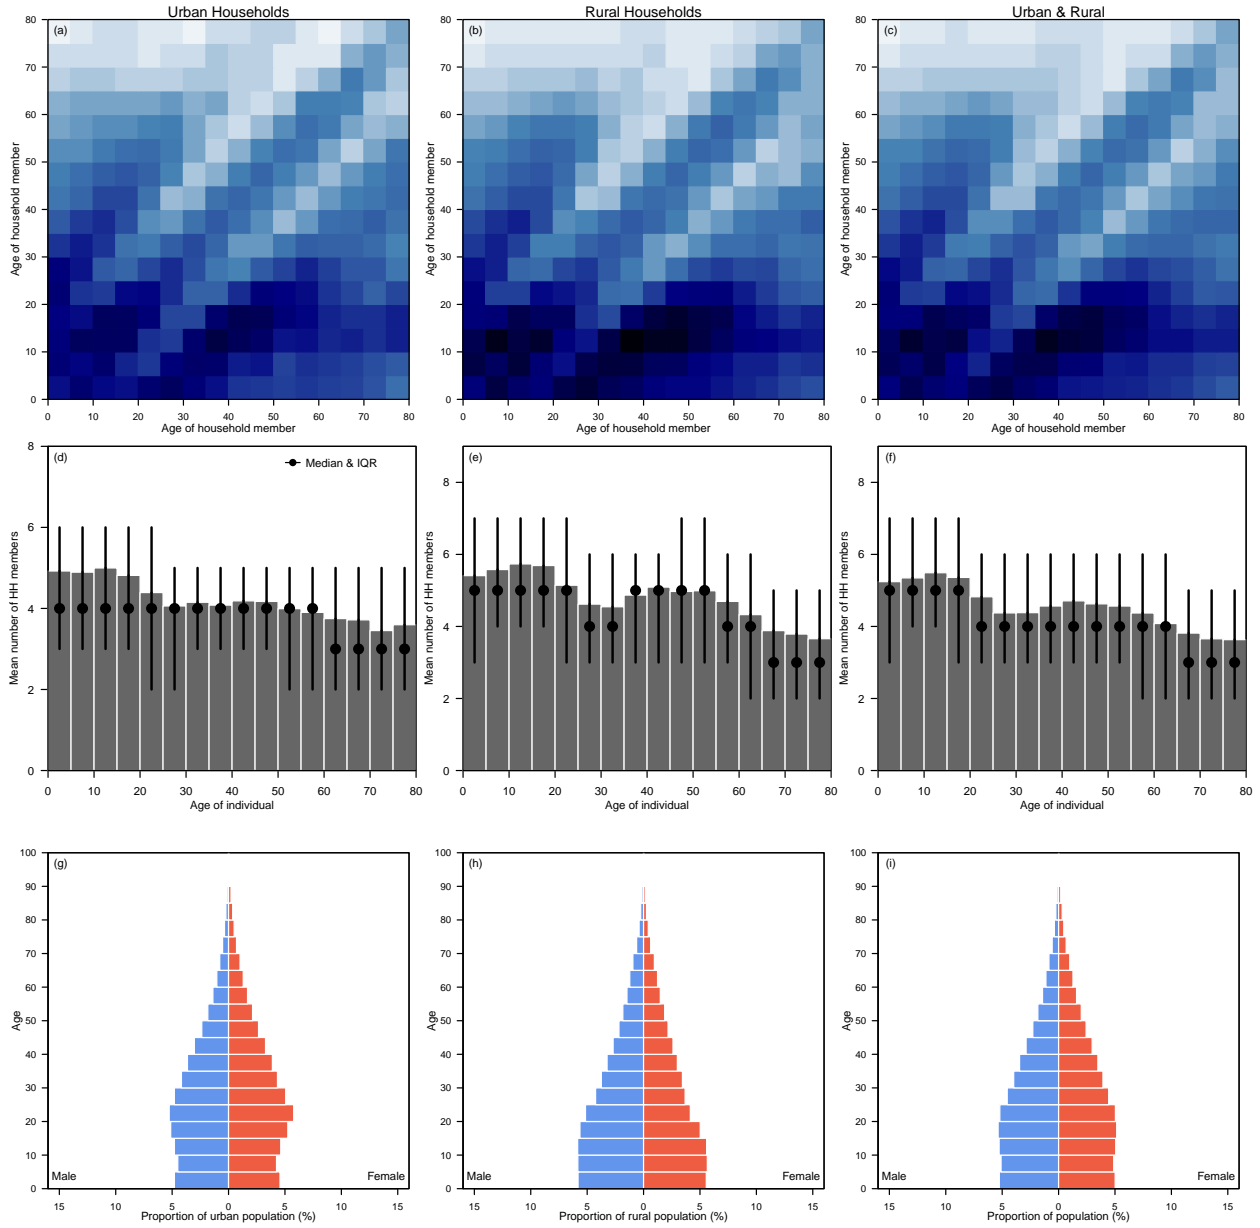

# Empirical DHS household data: India

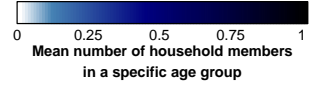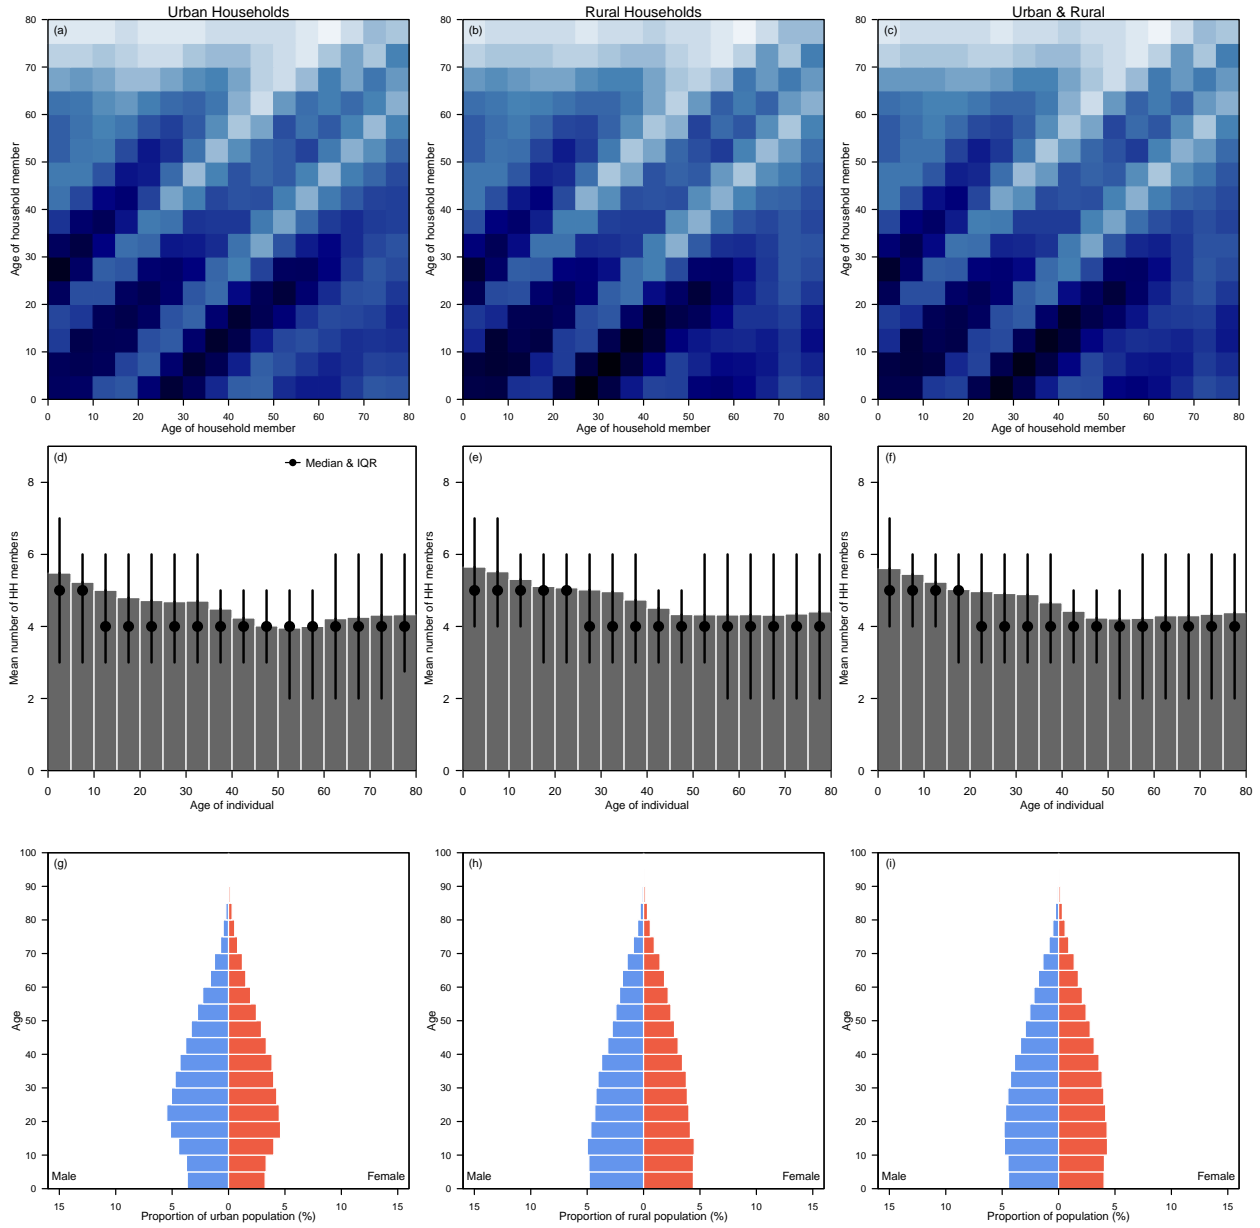





# Empirical DHS household data: Kenya

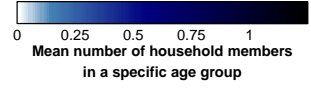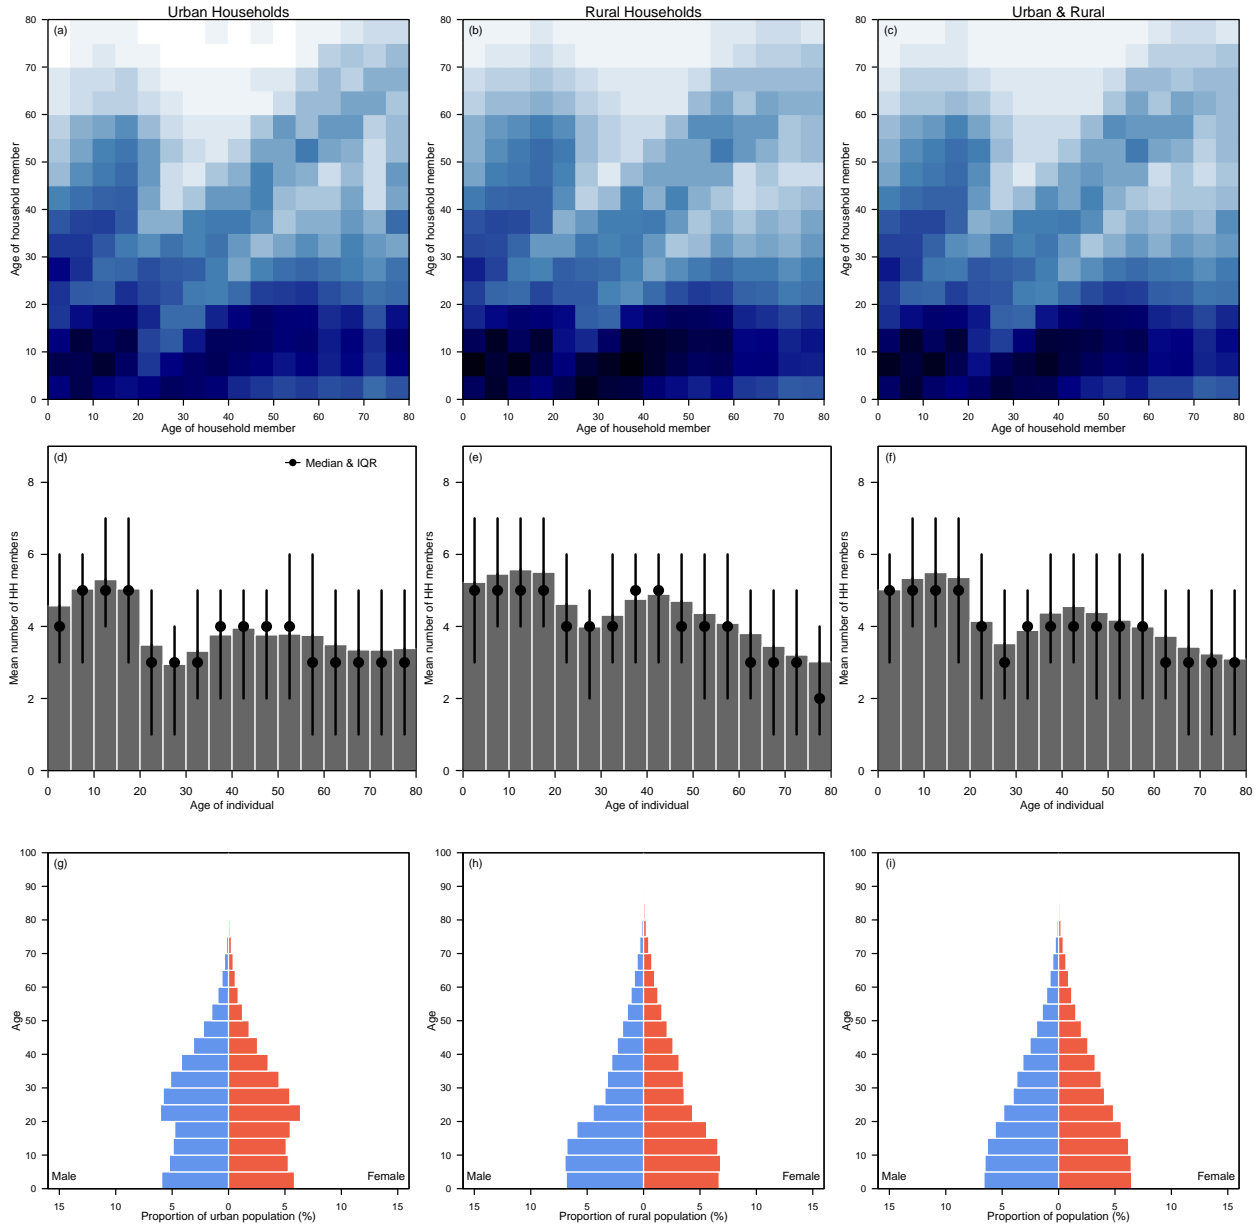

# Empirical DHS household data: Kyrgyzstan

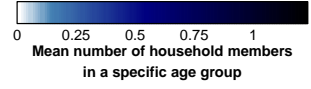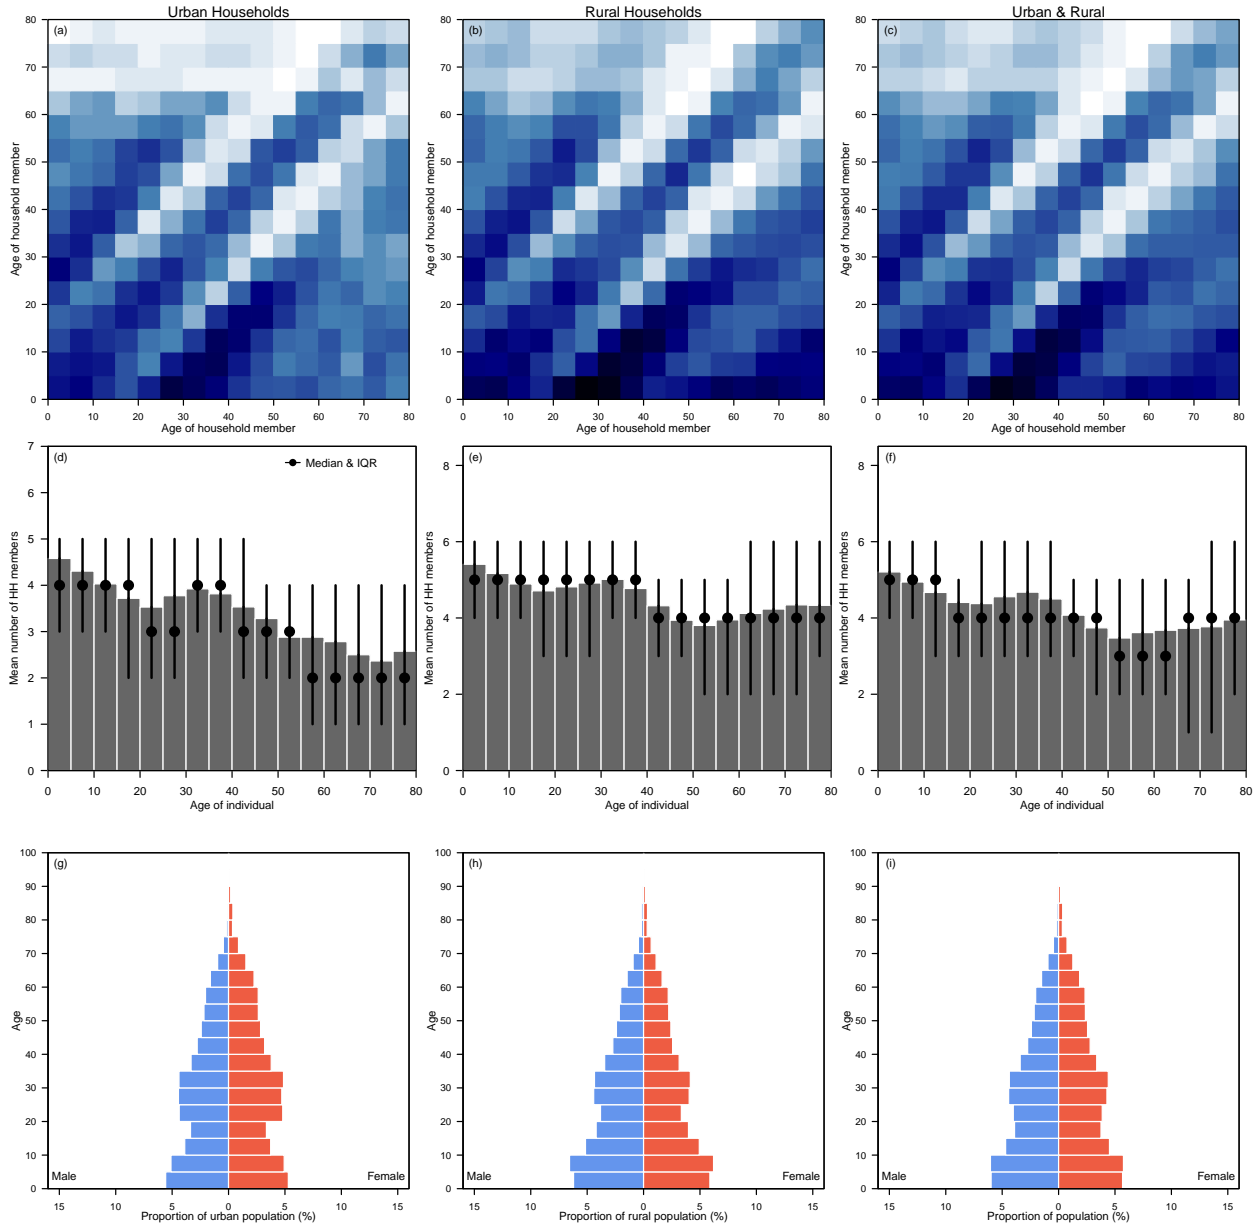

# Empirical DHS household data: Lesotho

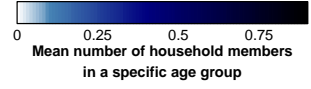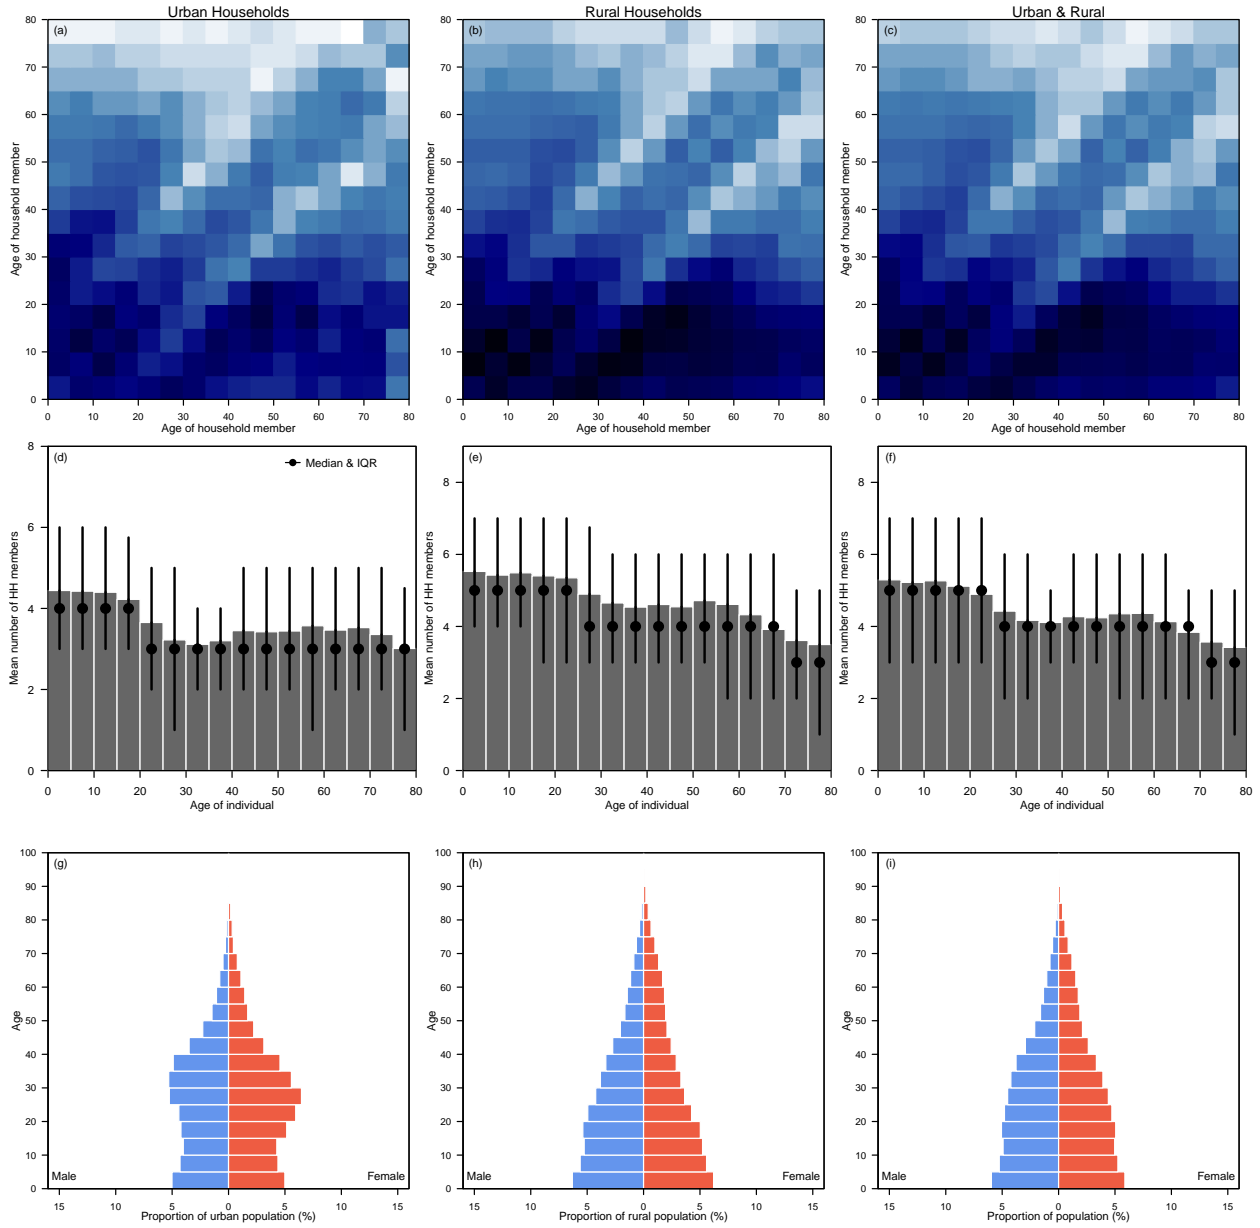

# Empirical DHS household data: Liberia

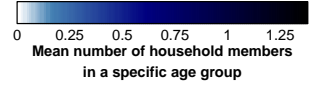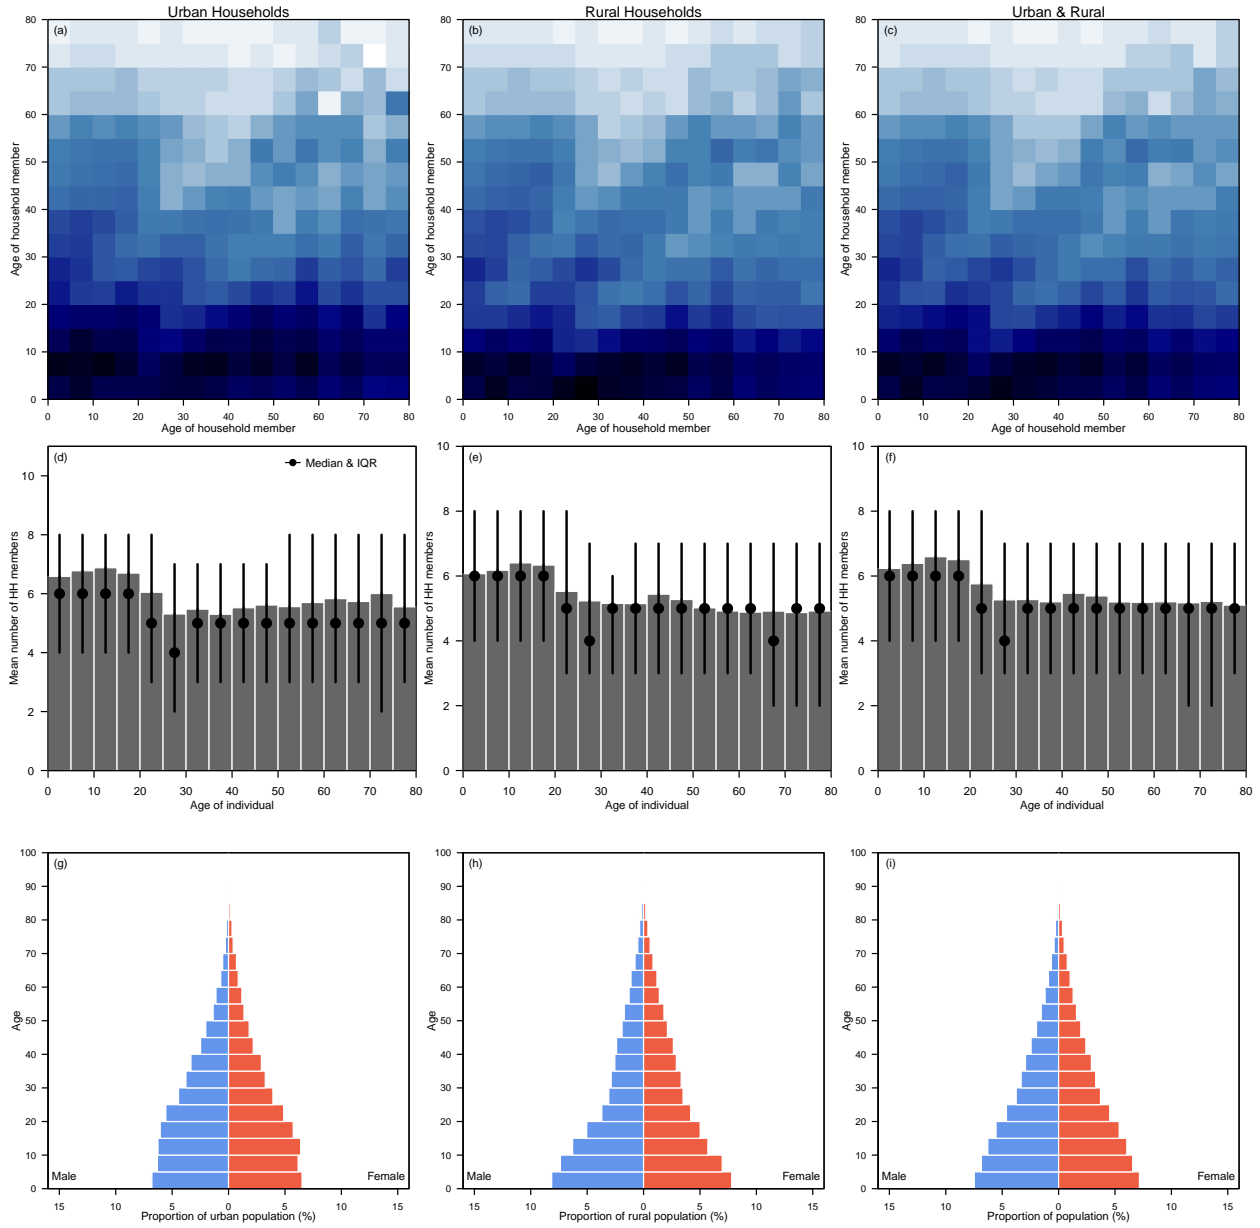

# Empirical DHS household data: Malawi

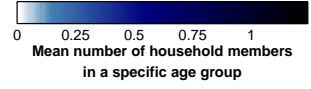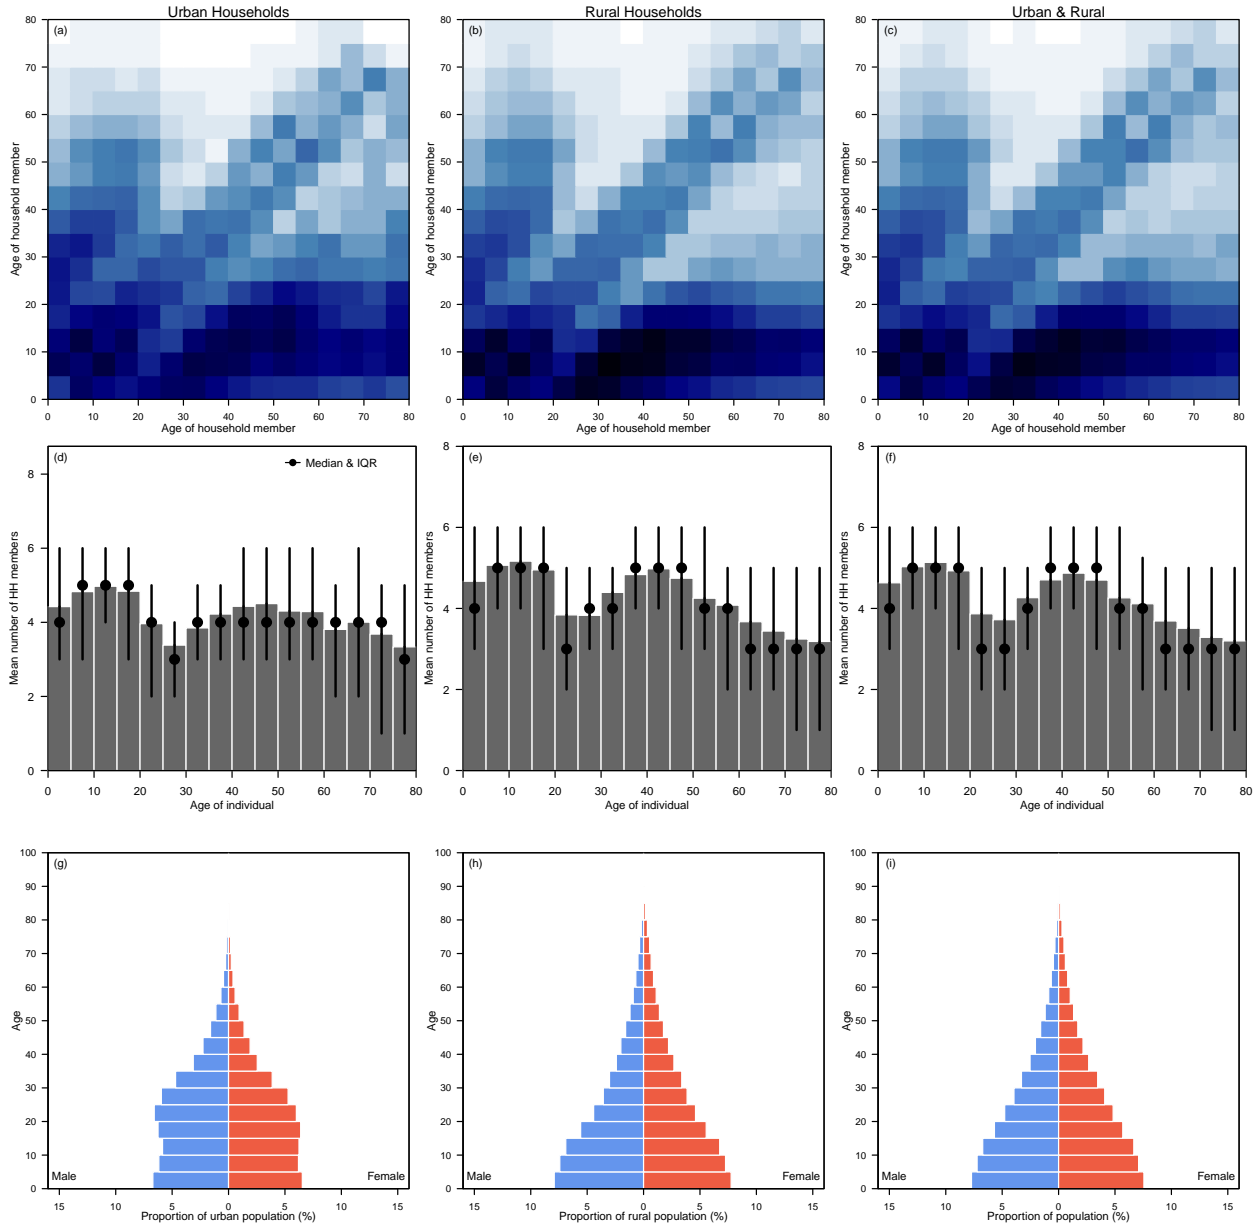

# Empirical DHS household data: Maldives

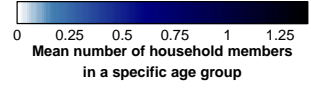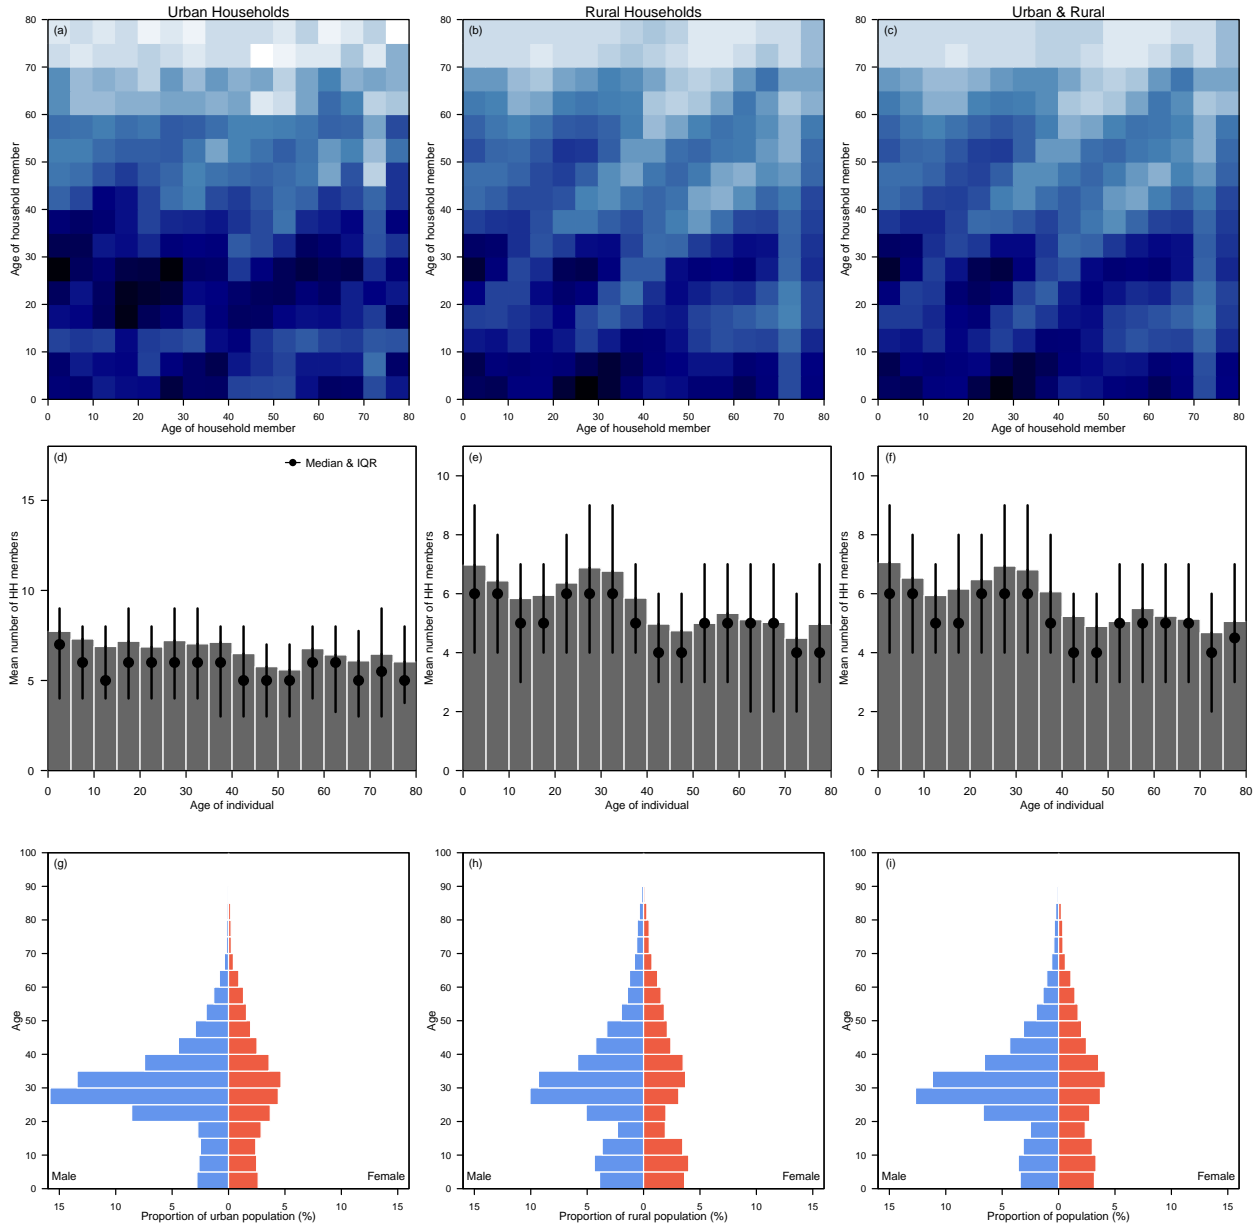



# Empirical DHS household data: Nepal

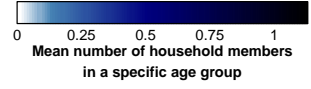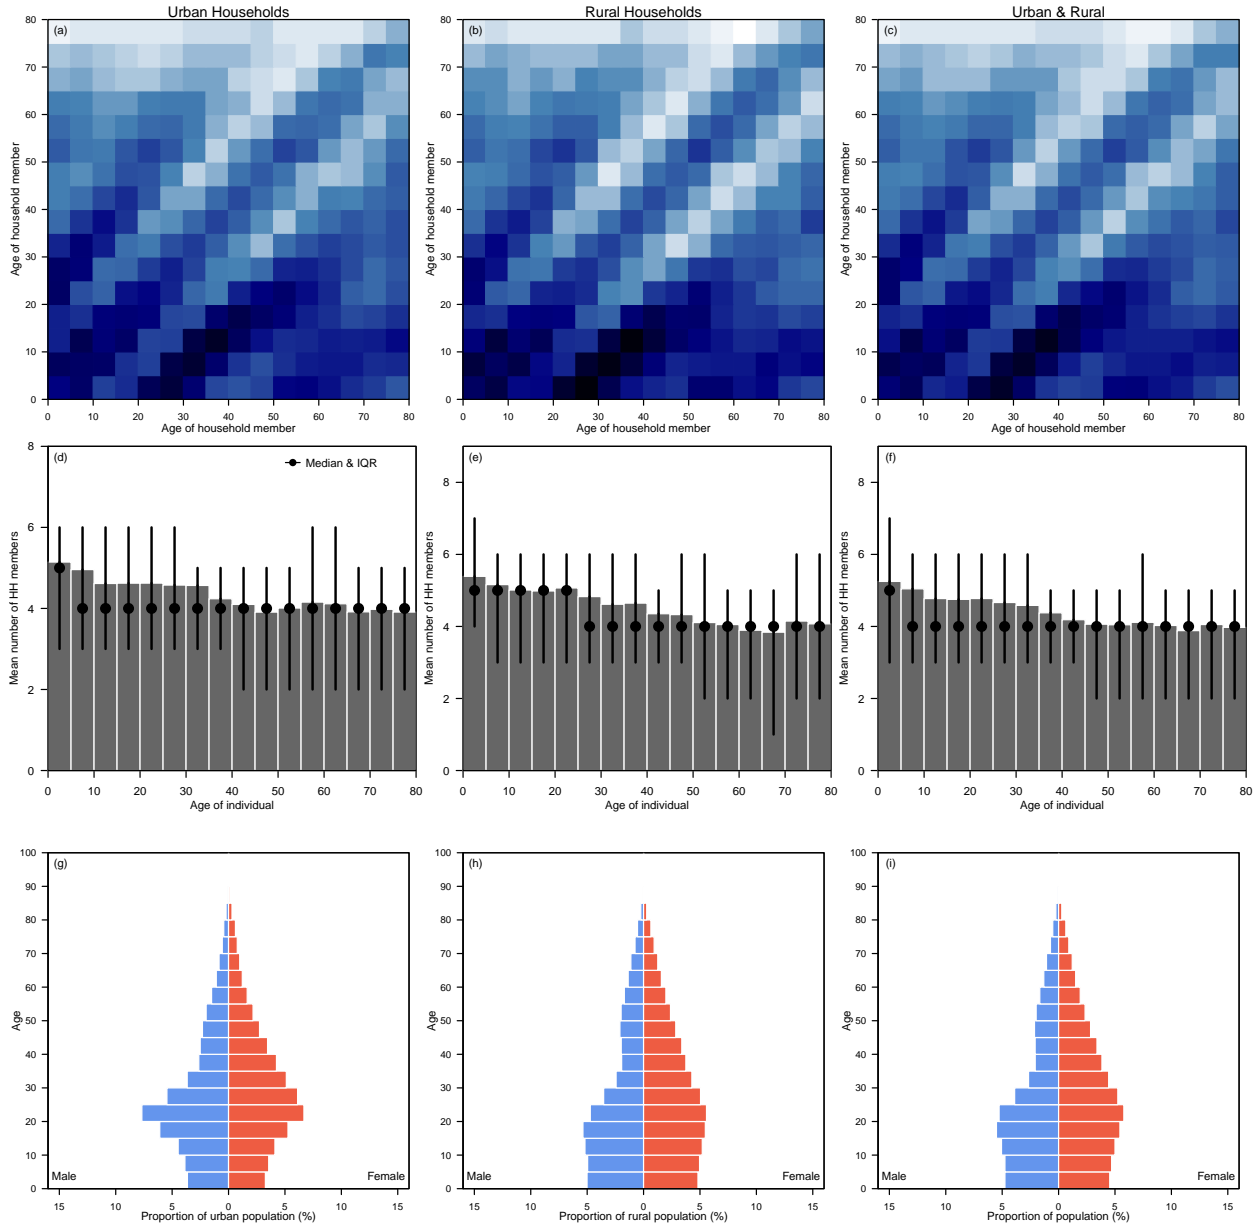



# Empirical DHS household data: Niger

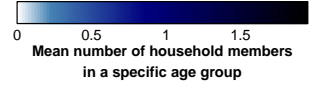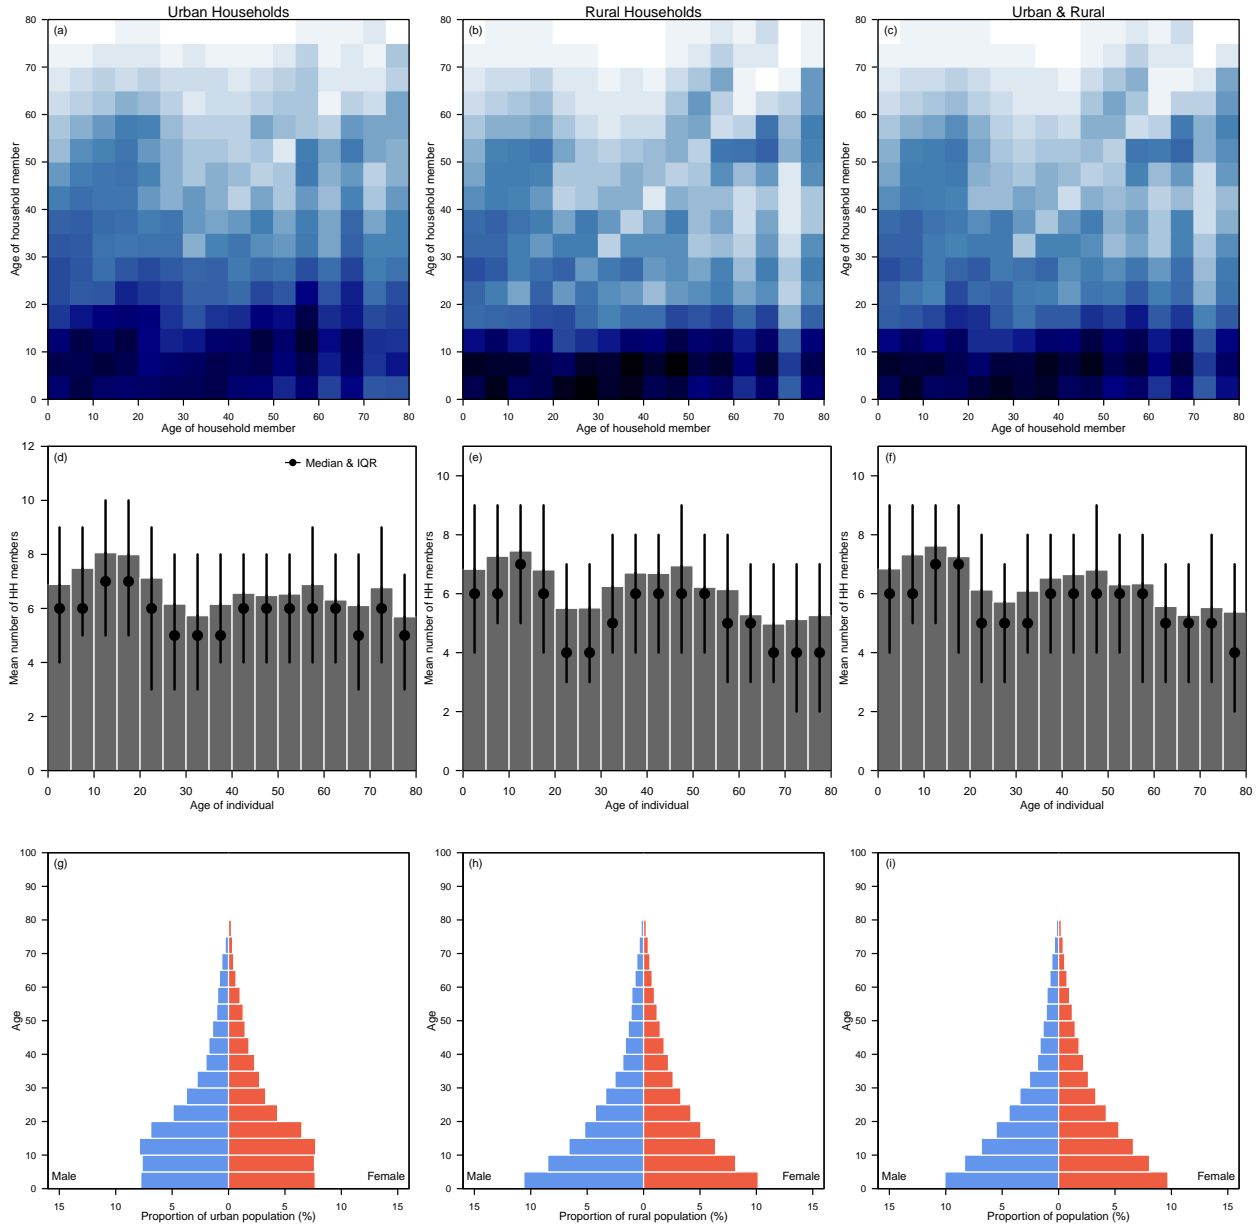

# Empirical DHS household data: Nigeria

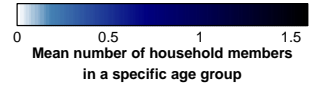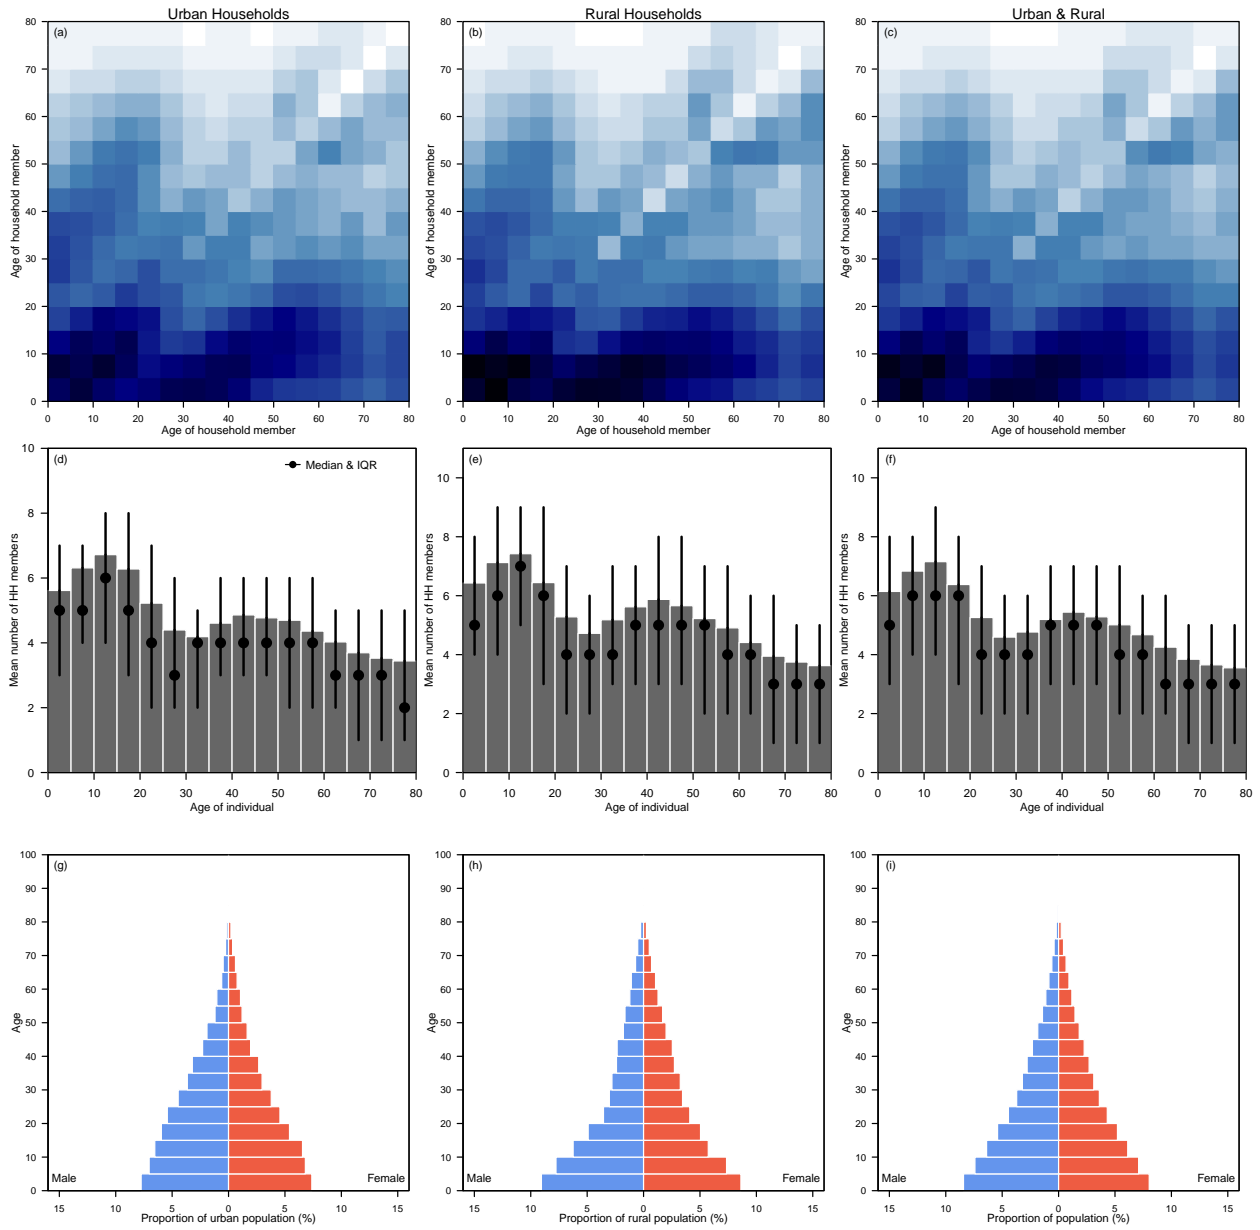

# Empirical DHS household data: Pakistan

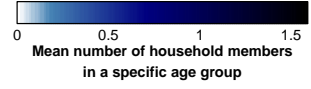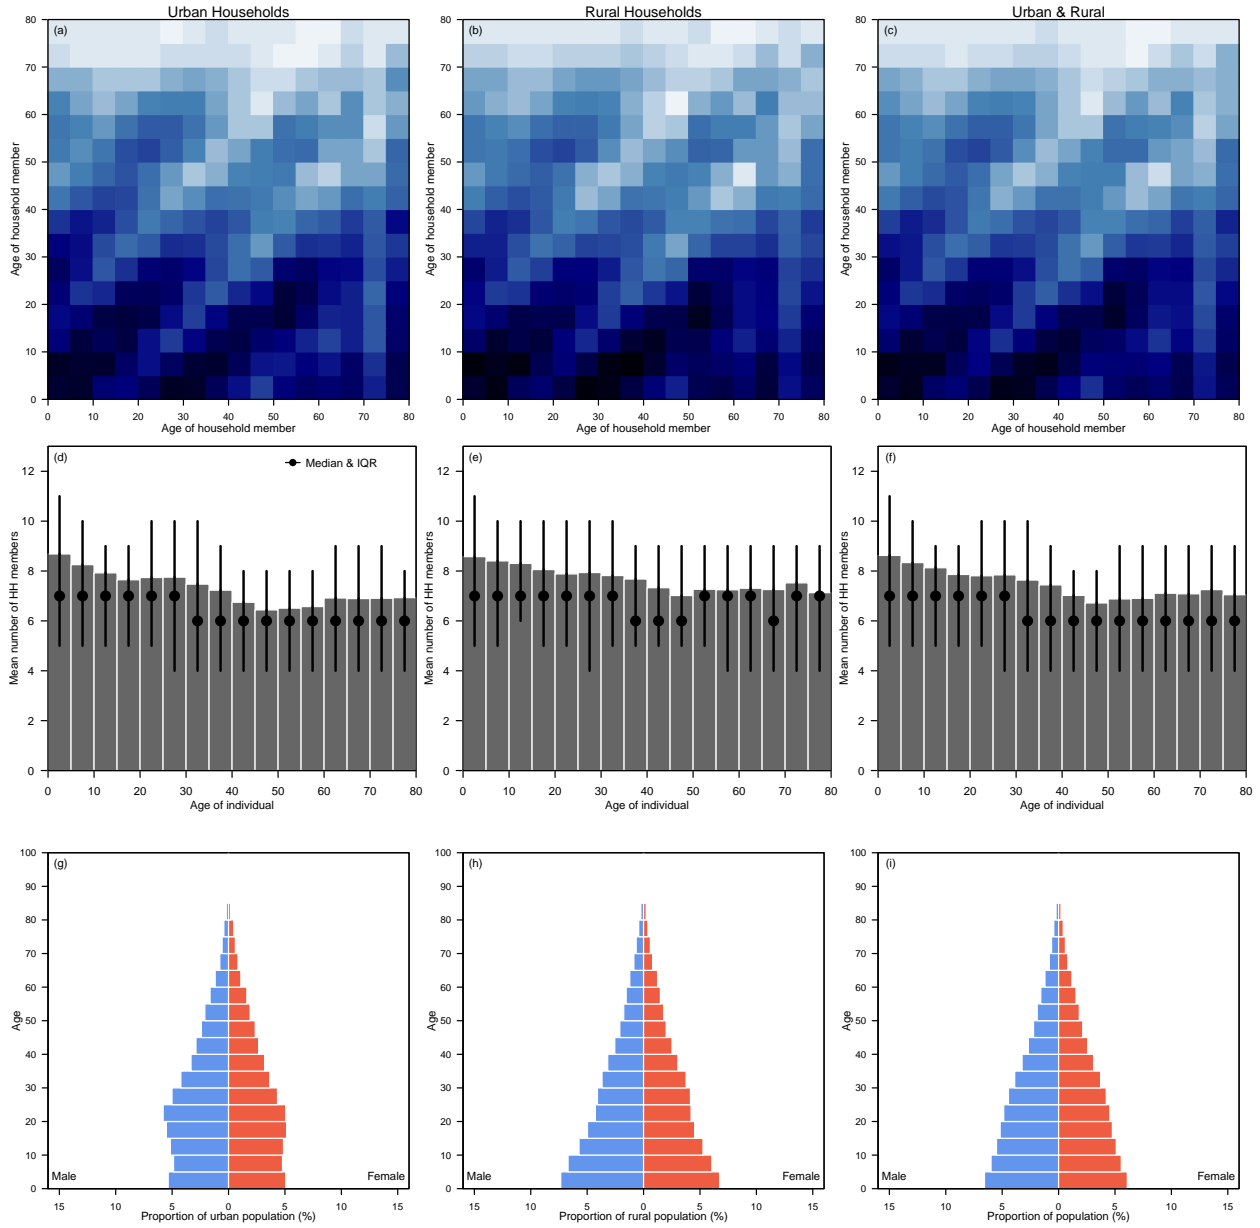

# Empirical DHS household data: Peru

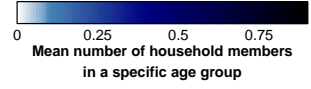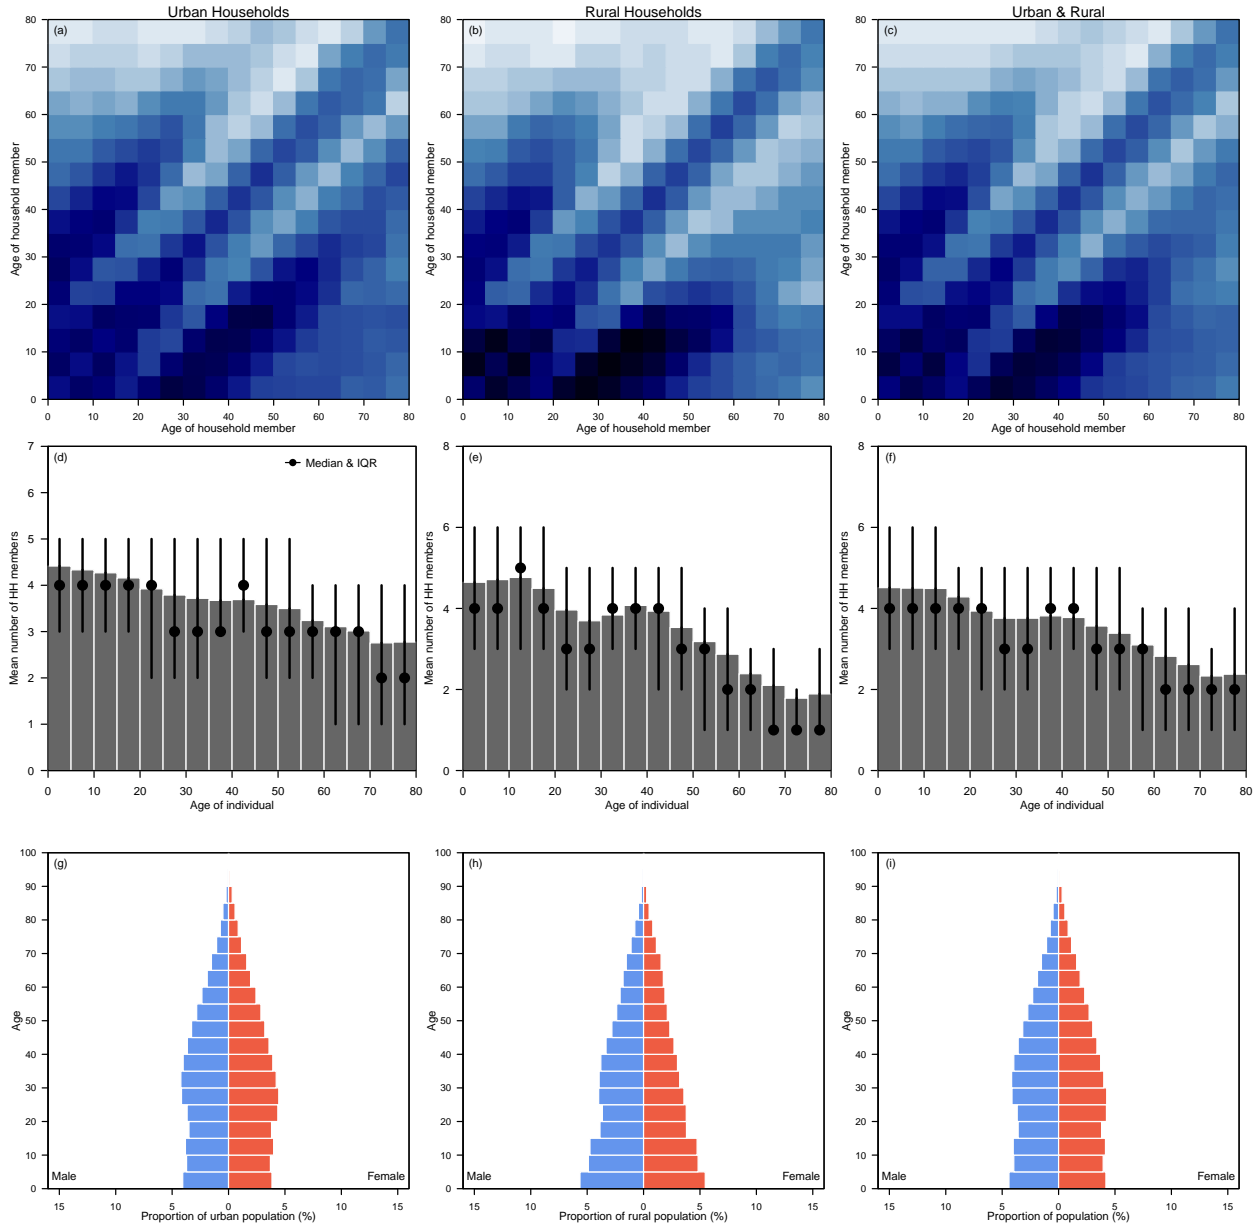

# Empirical DHS household data: Philippines

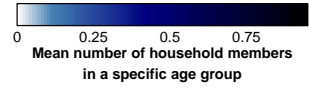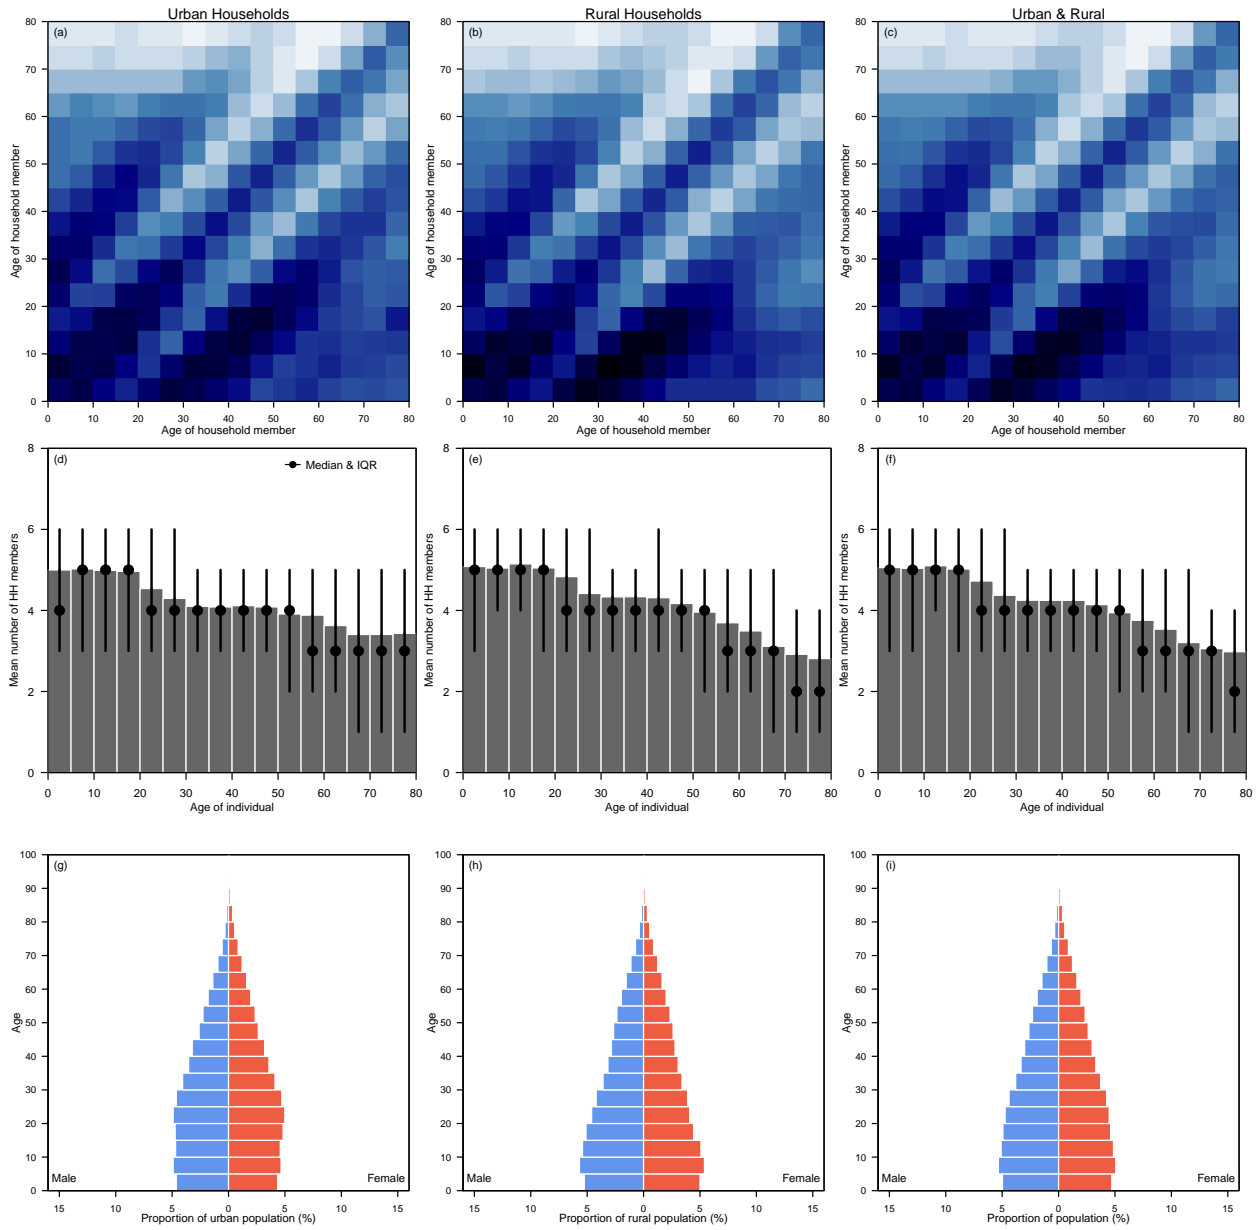

# Empirical DHS household data: Senegal

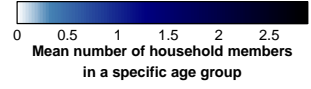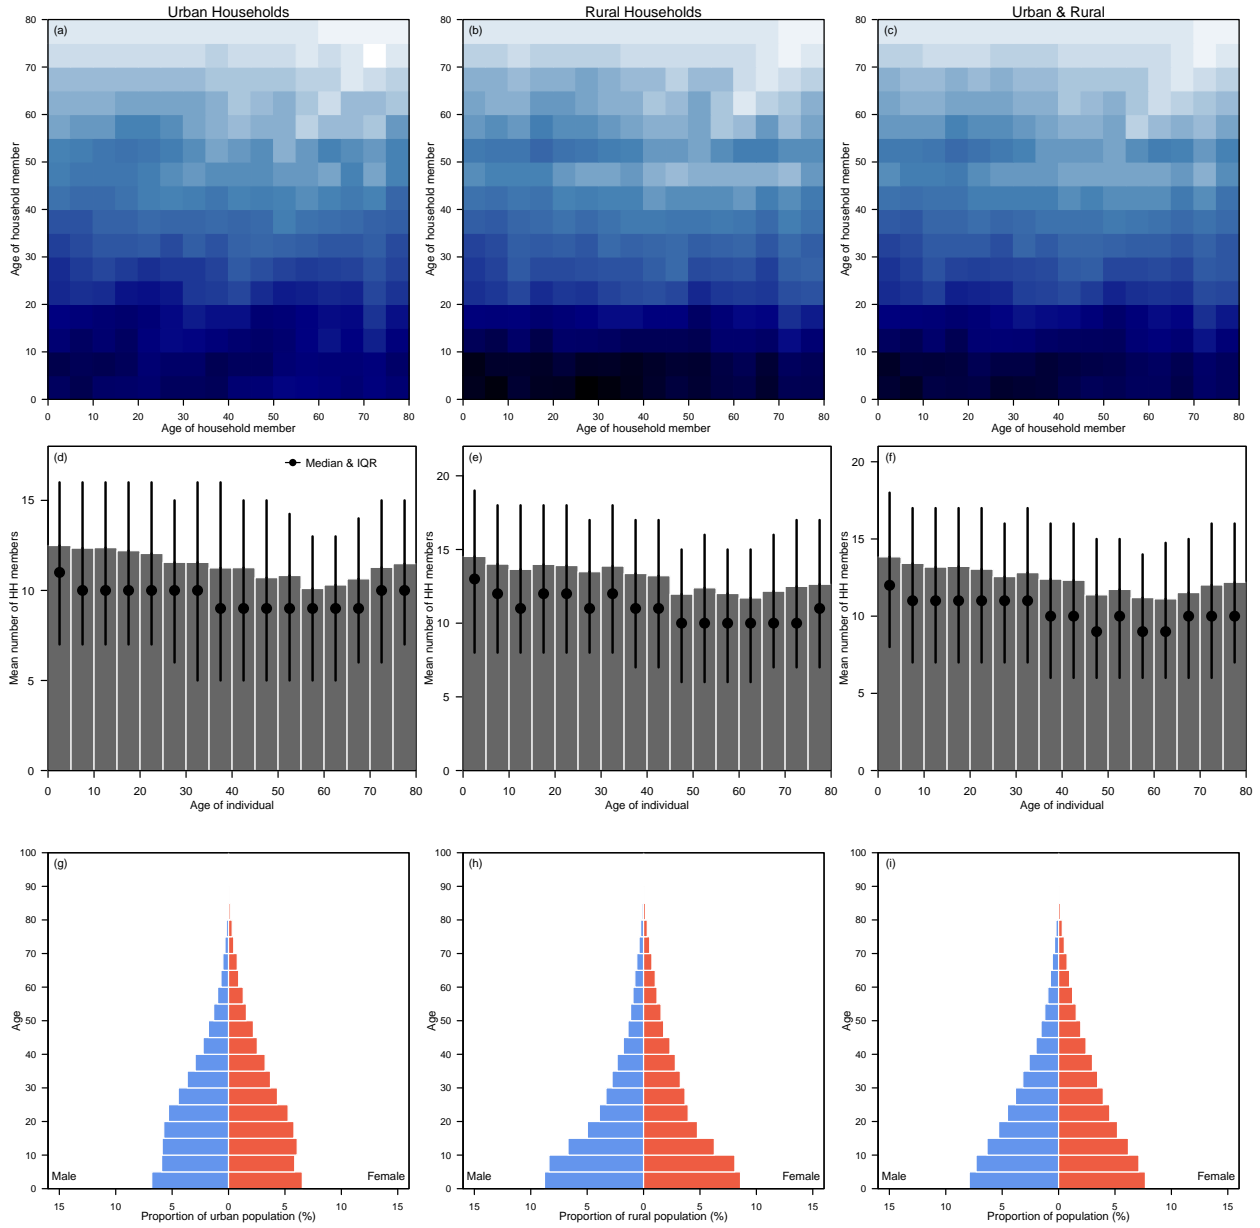

# Empirical DHS household data: Sierra Leone

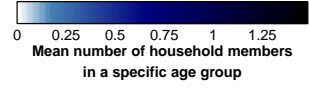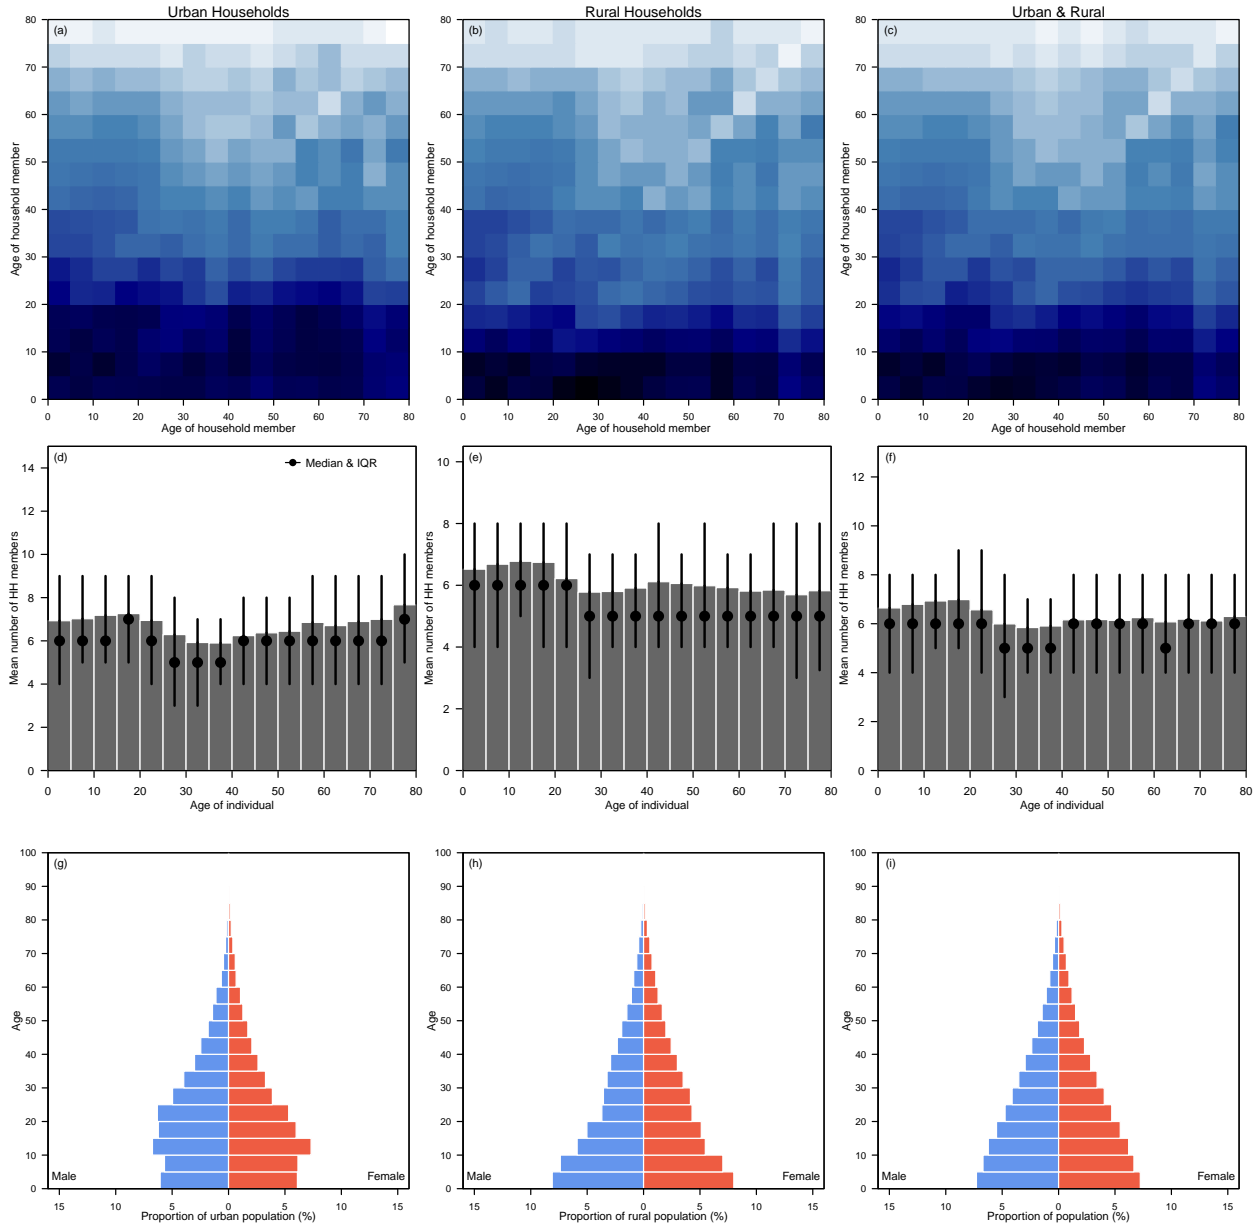





# Empirical DHS household data: Timor-Leste

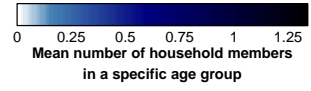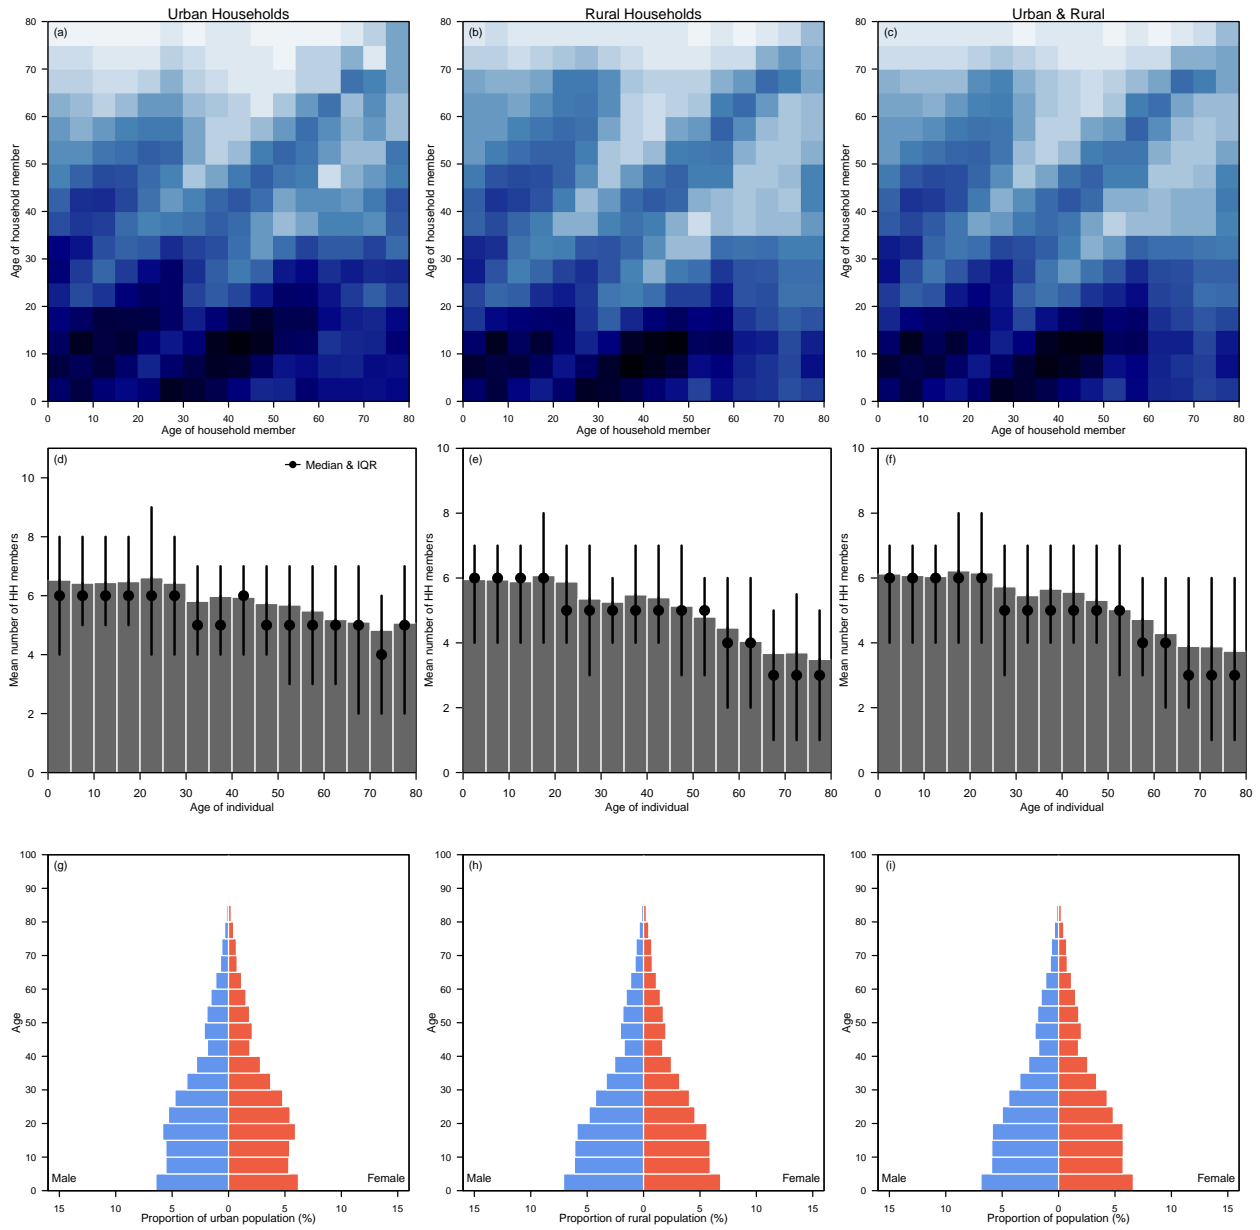

# Empirical DHS household data: Togo

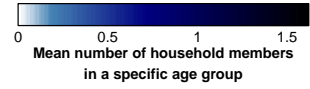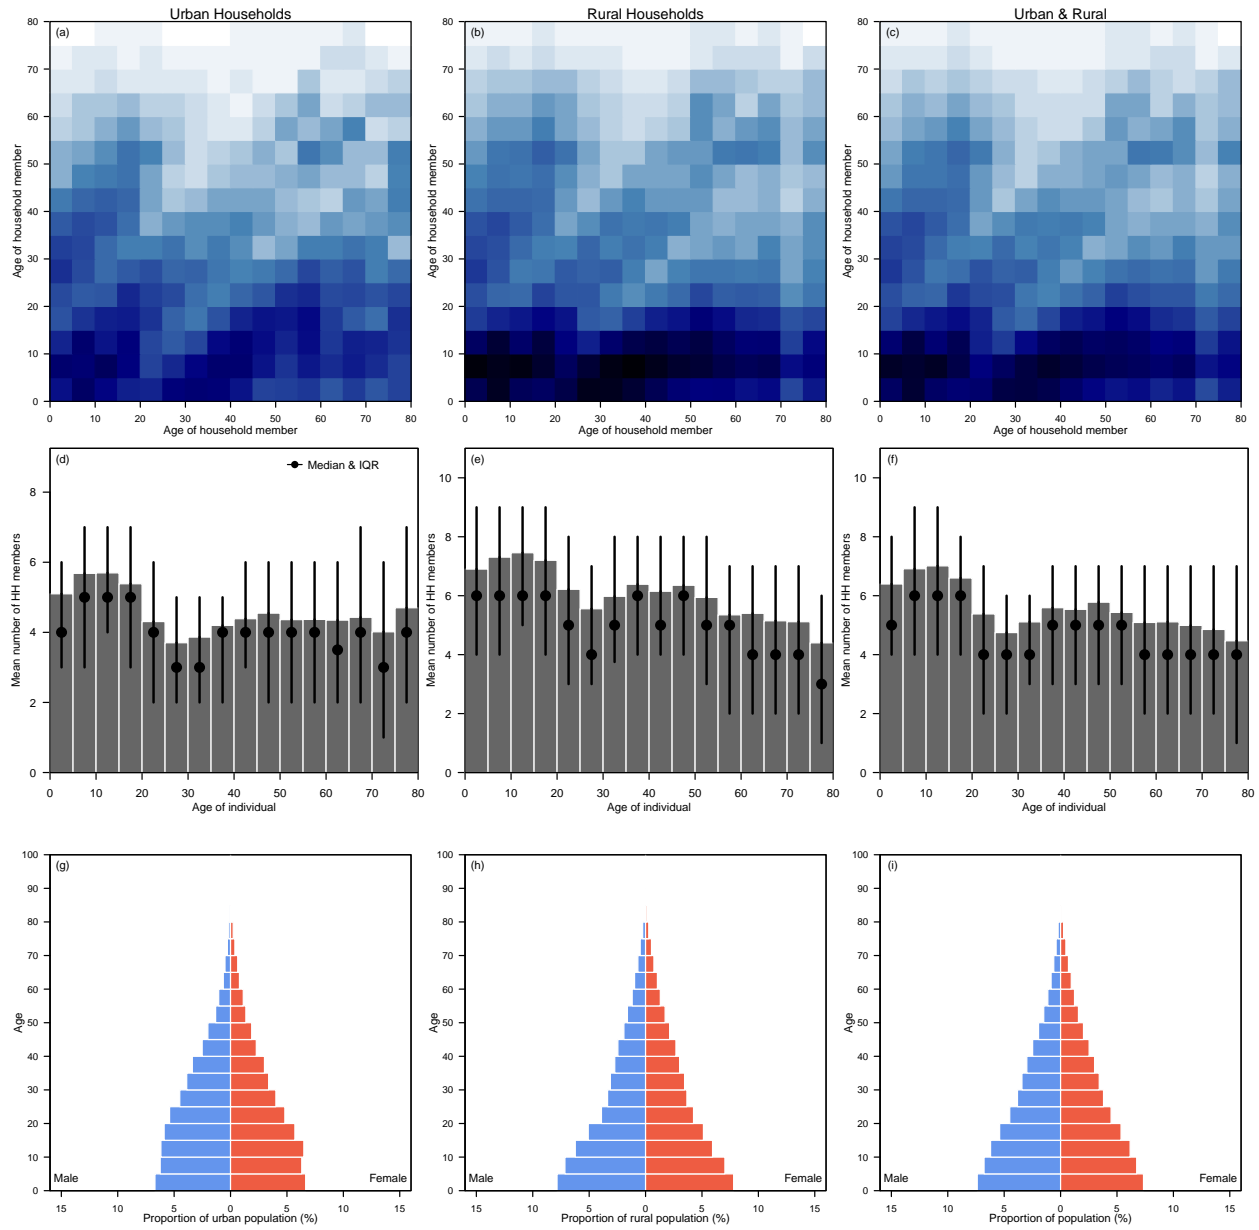

# Empirical DHS household data: Uganda

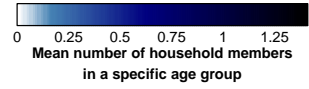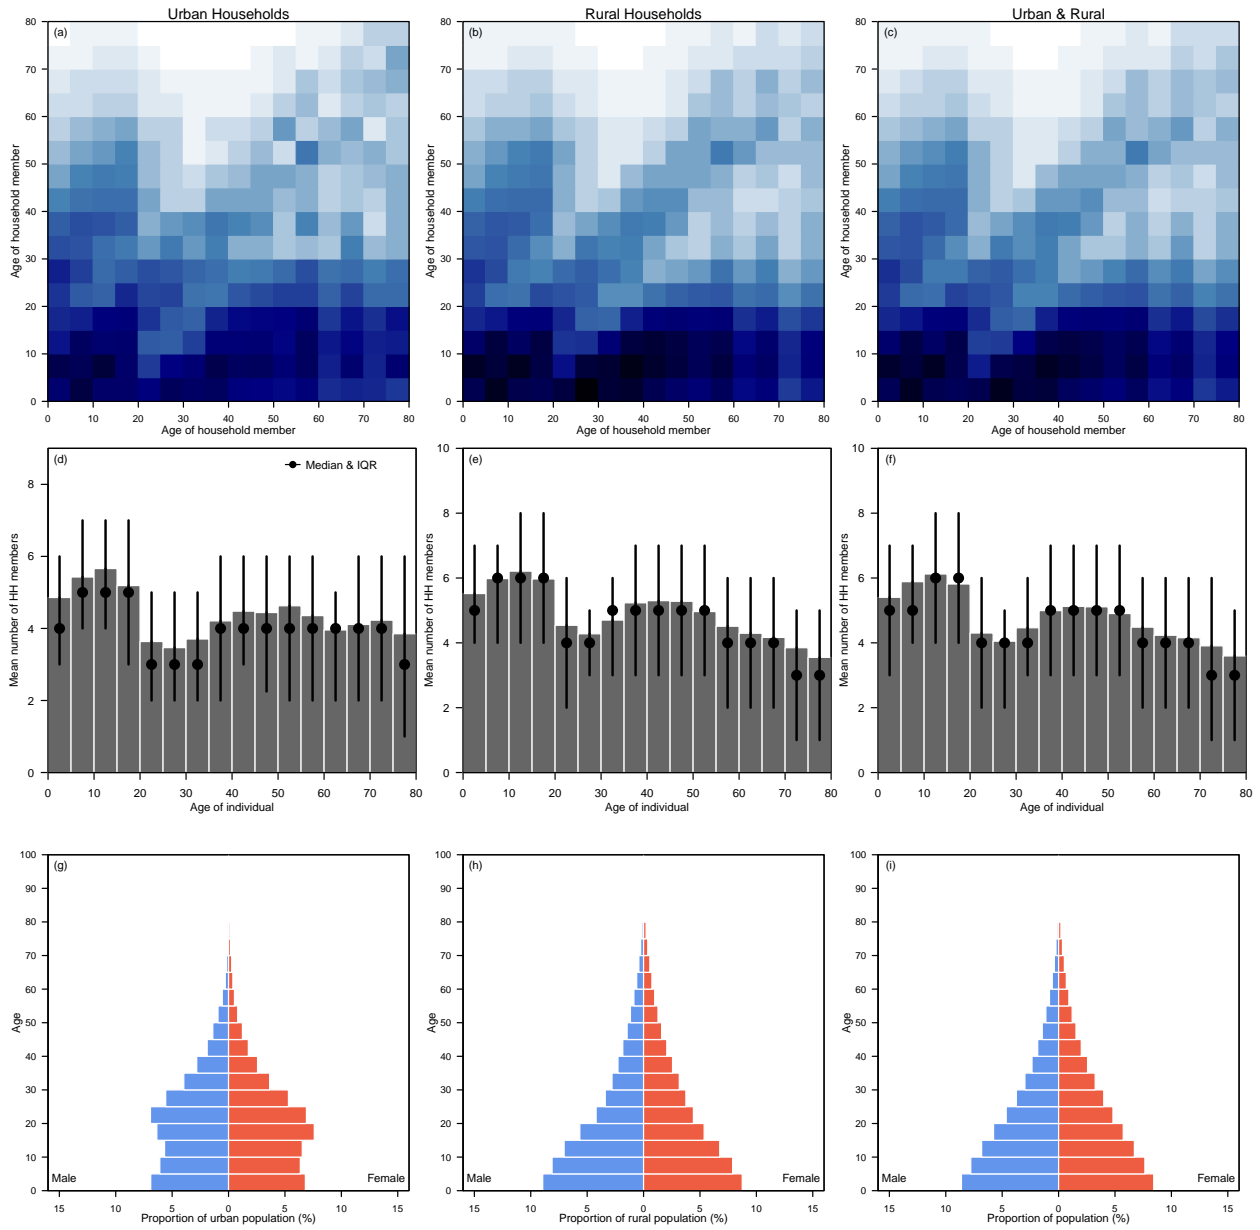

# Empirical DHS household data: Viet Nam

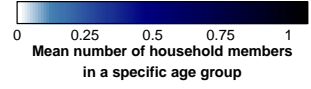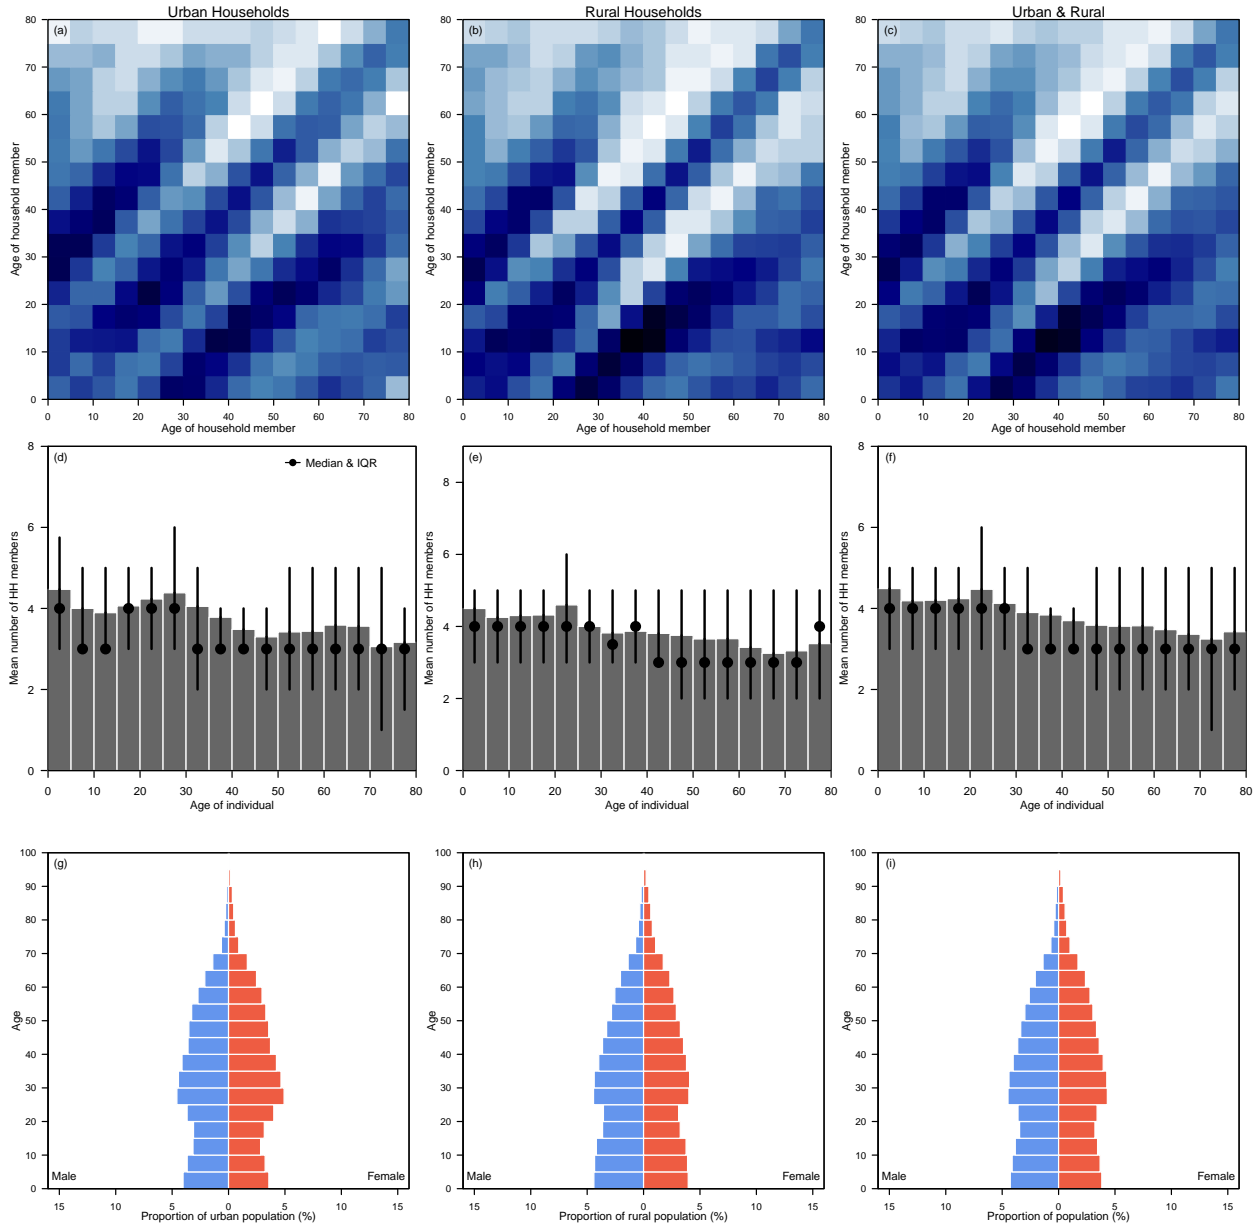

# Empirical DHS household data: Zambia

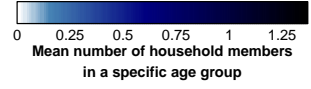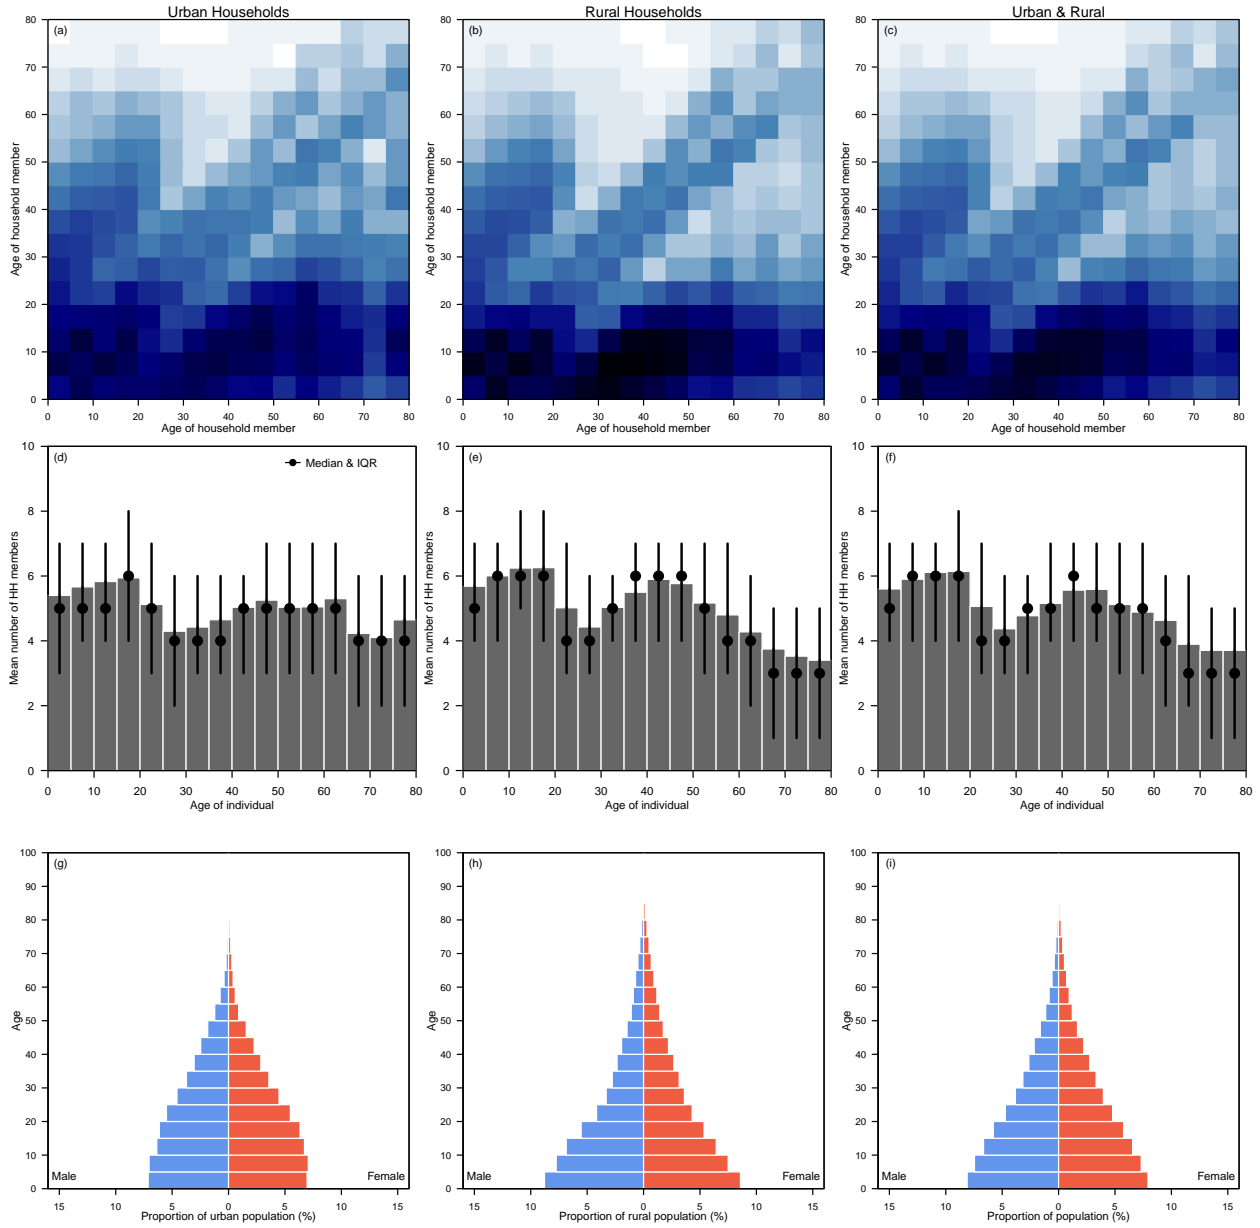

# Empirical DHS household data: Zimbabwe

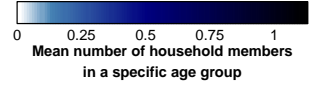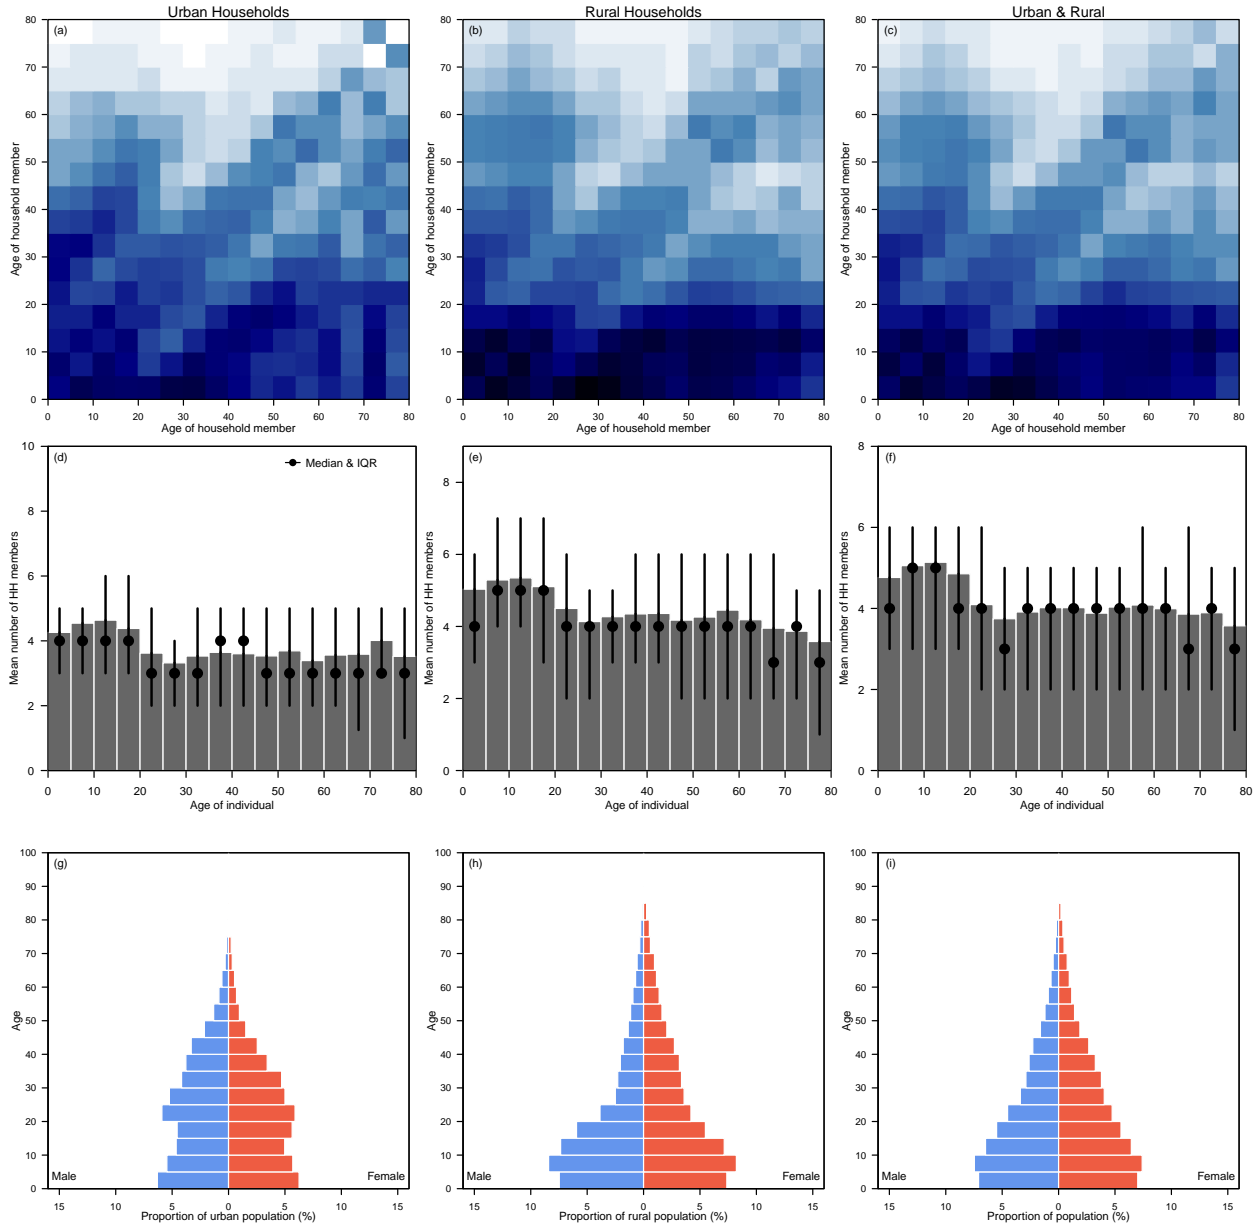

## 2.3 Updated age- and location-specific contact matrices

The 2017 synthetic matrices provide validated approximations to age-and-location-specific contact matrices for 152 geographical regions. We have therefore updated these matrices with the most recent data—Demographic Household Surveys, World Bank and UN Population Division—extending the coverage to 177 geographical locations, covering 97.2% of the world’s population.

# Afghanistan

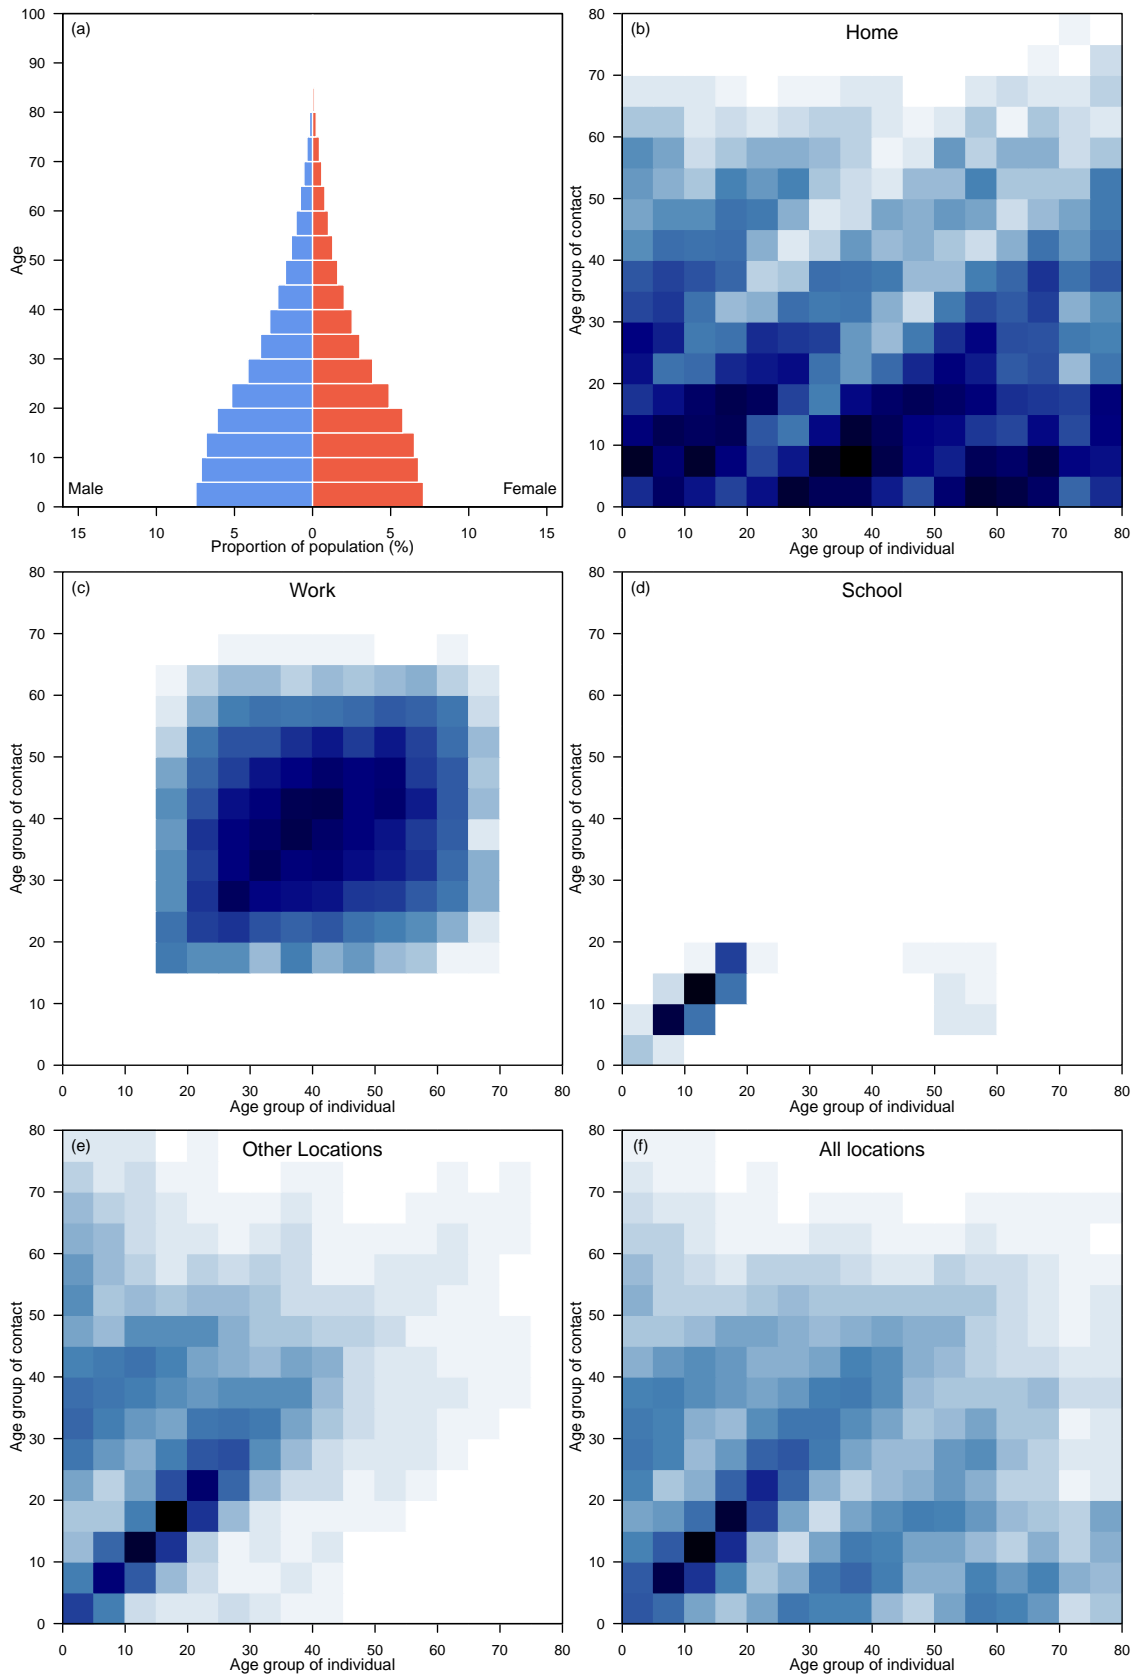



# Albania

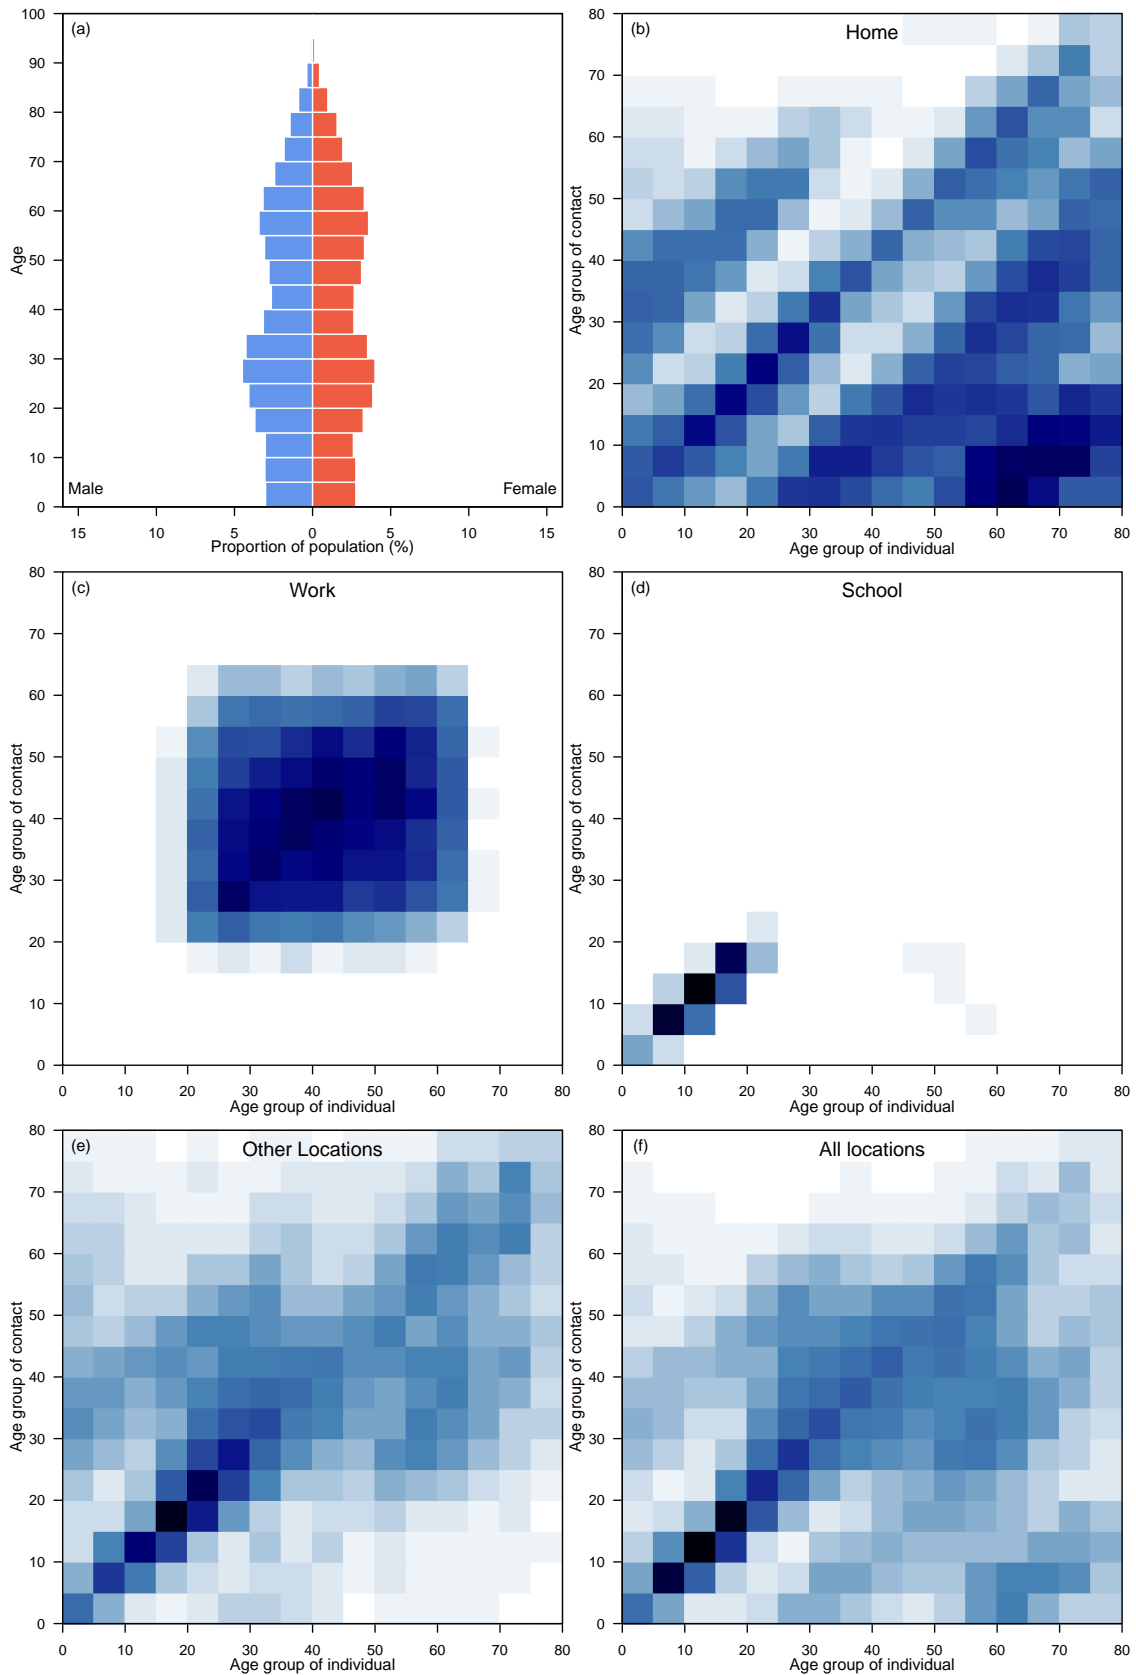

# Algeria

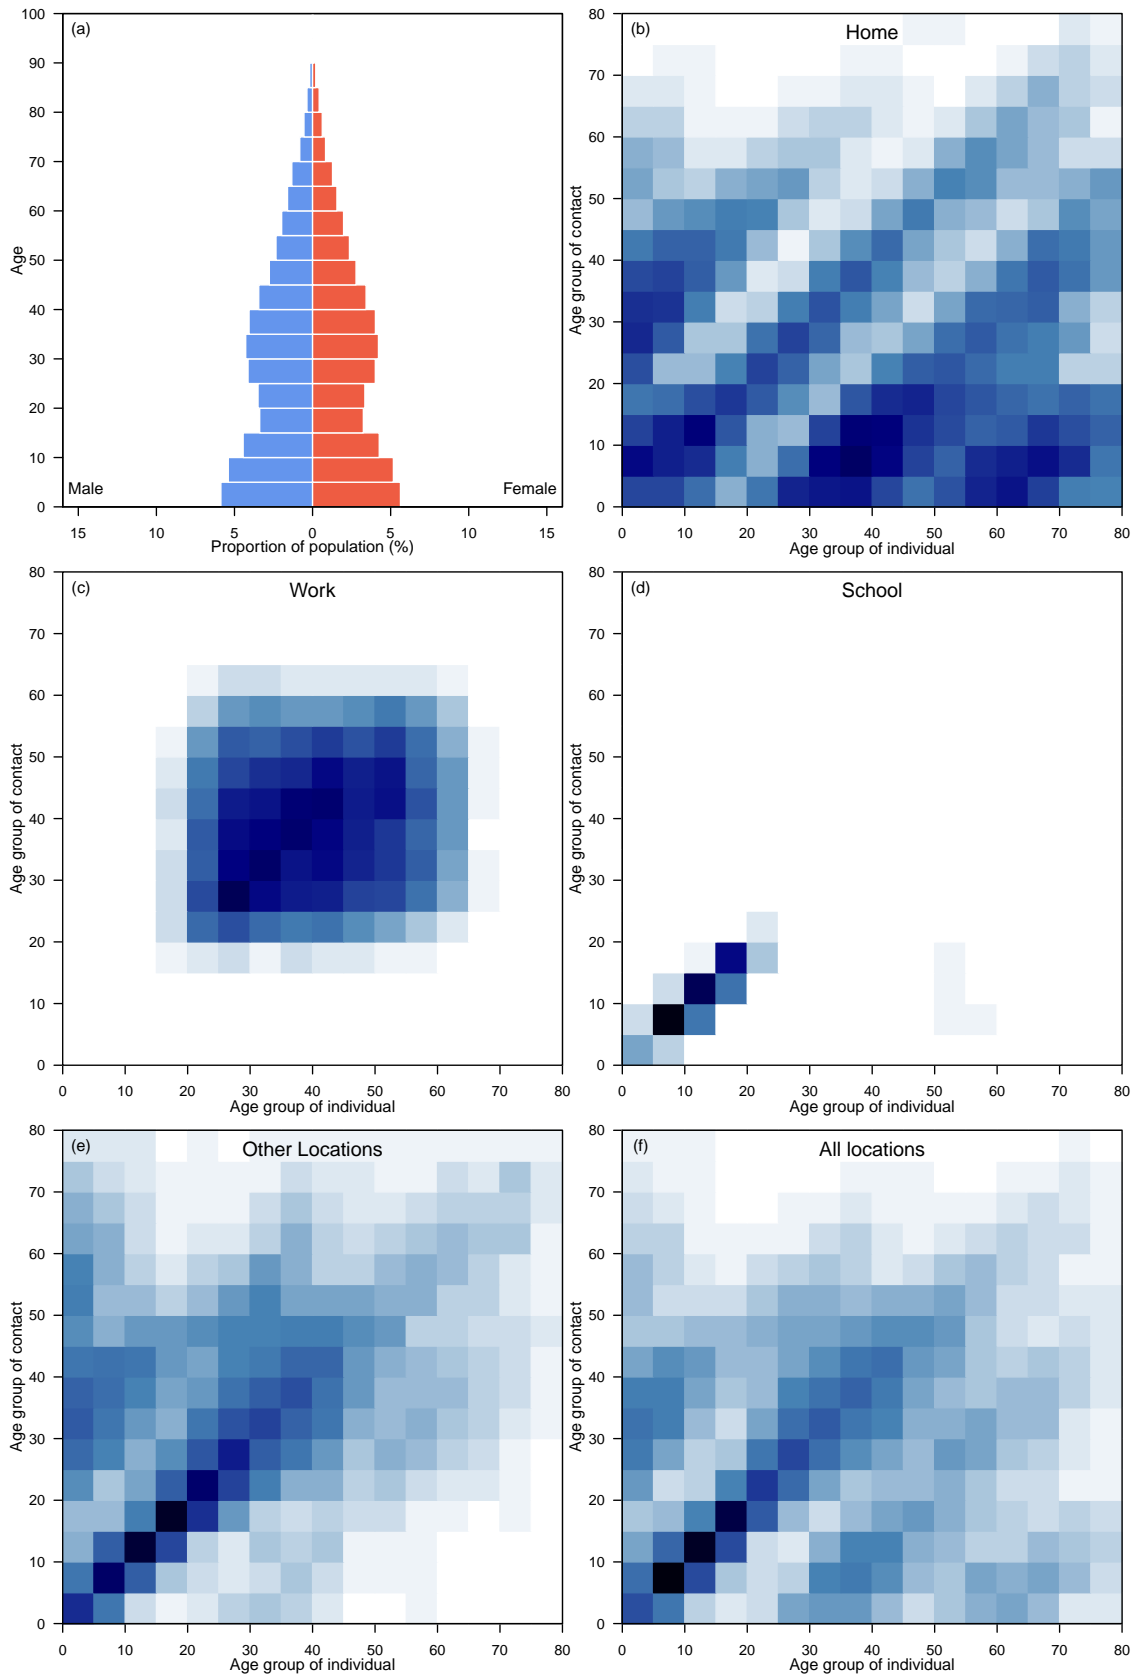

# Angola

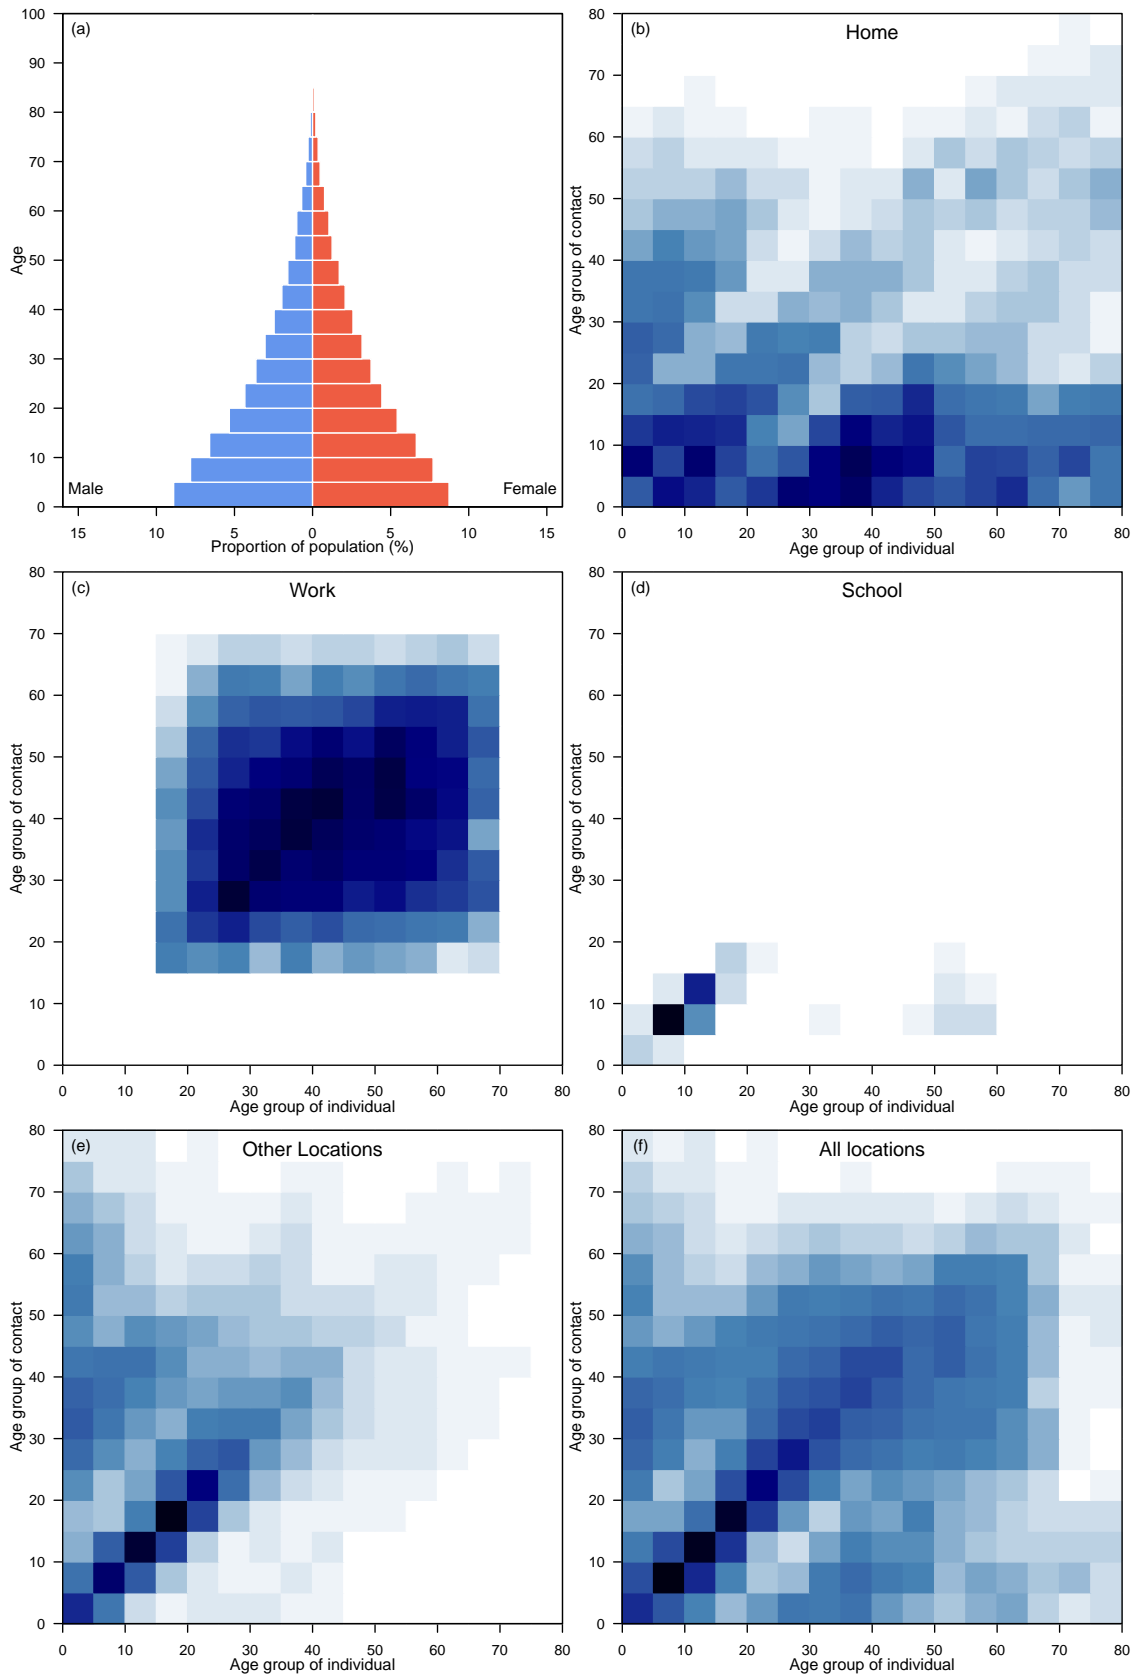

# Argentina

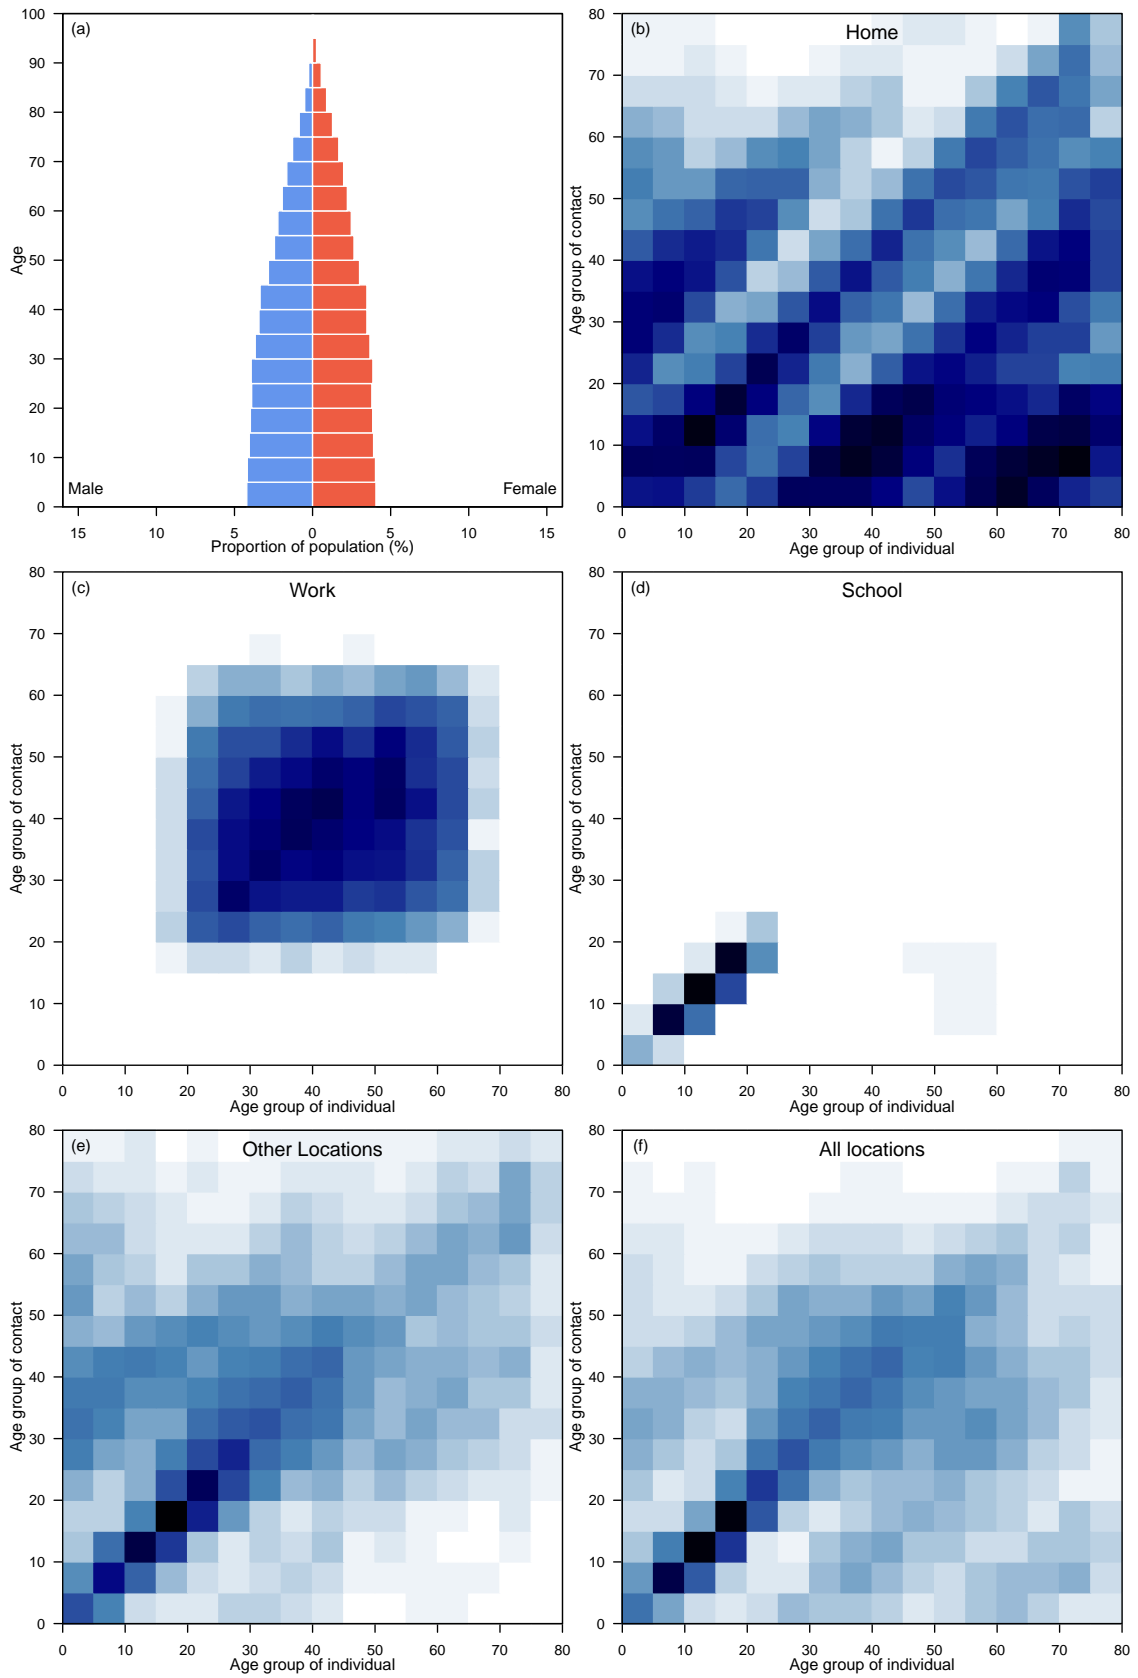

# Armenia

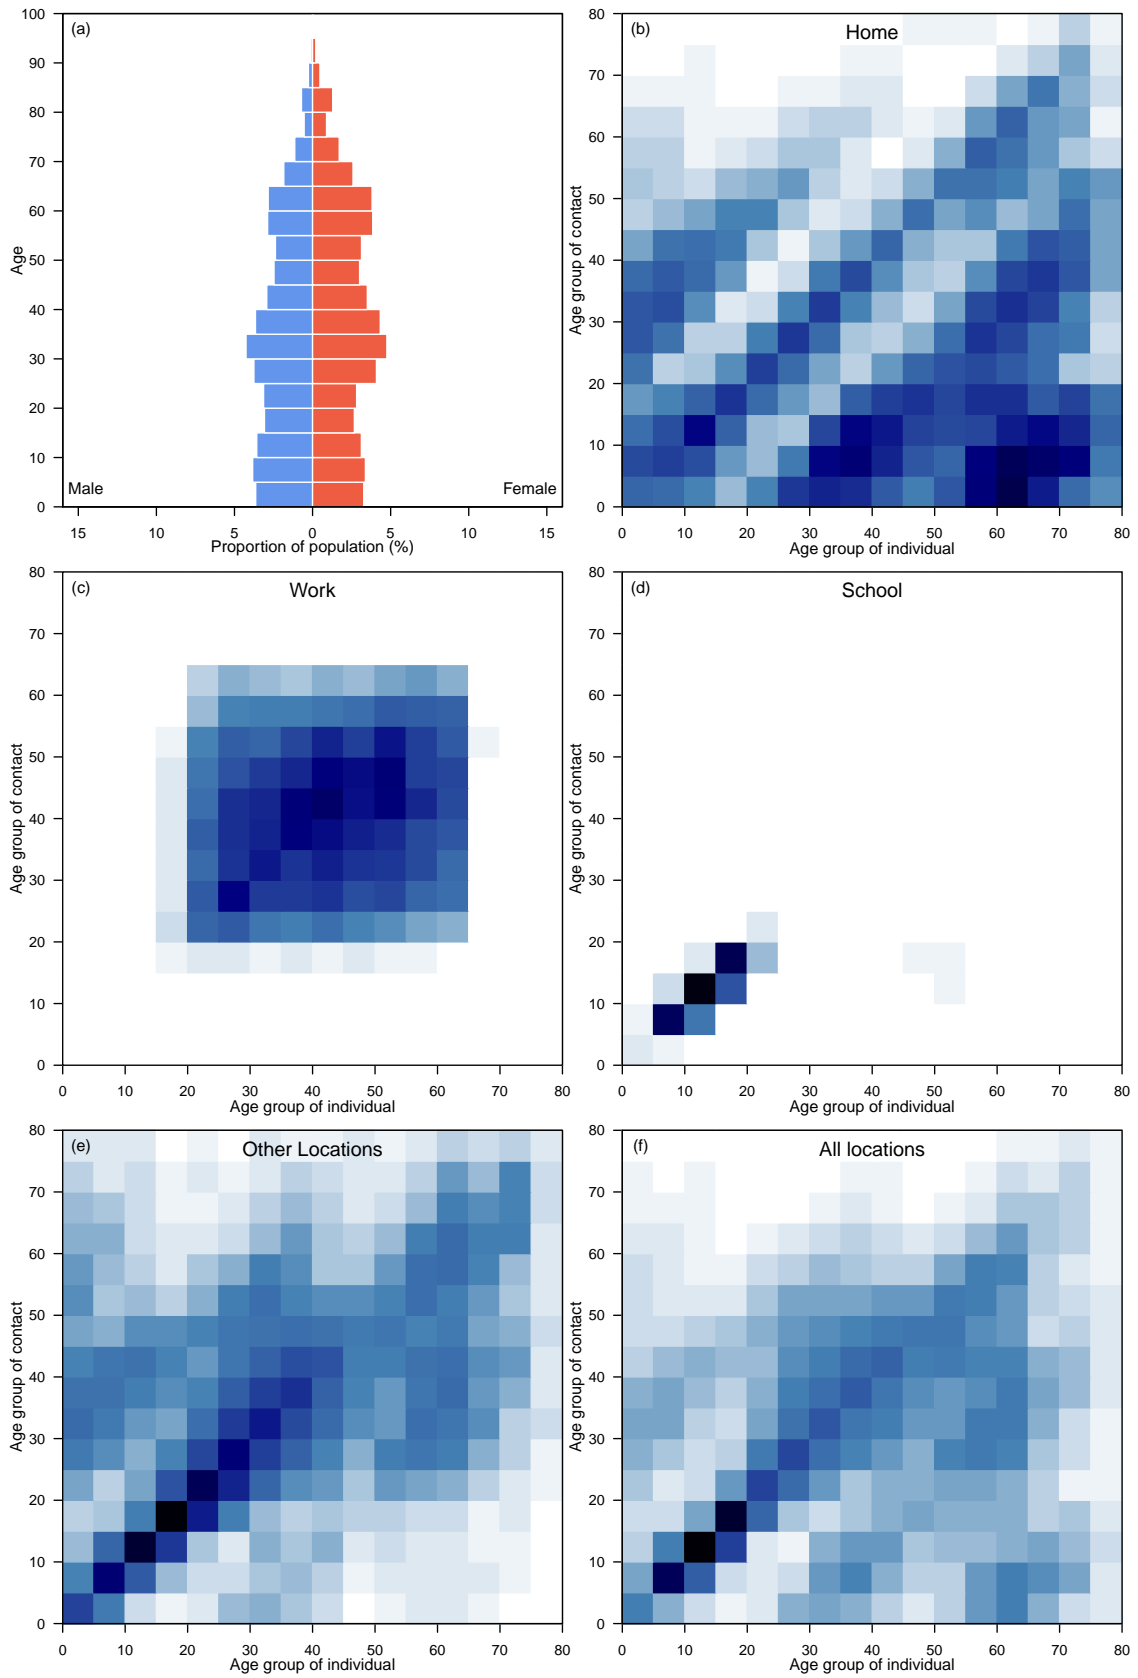

# Austria

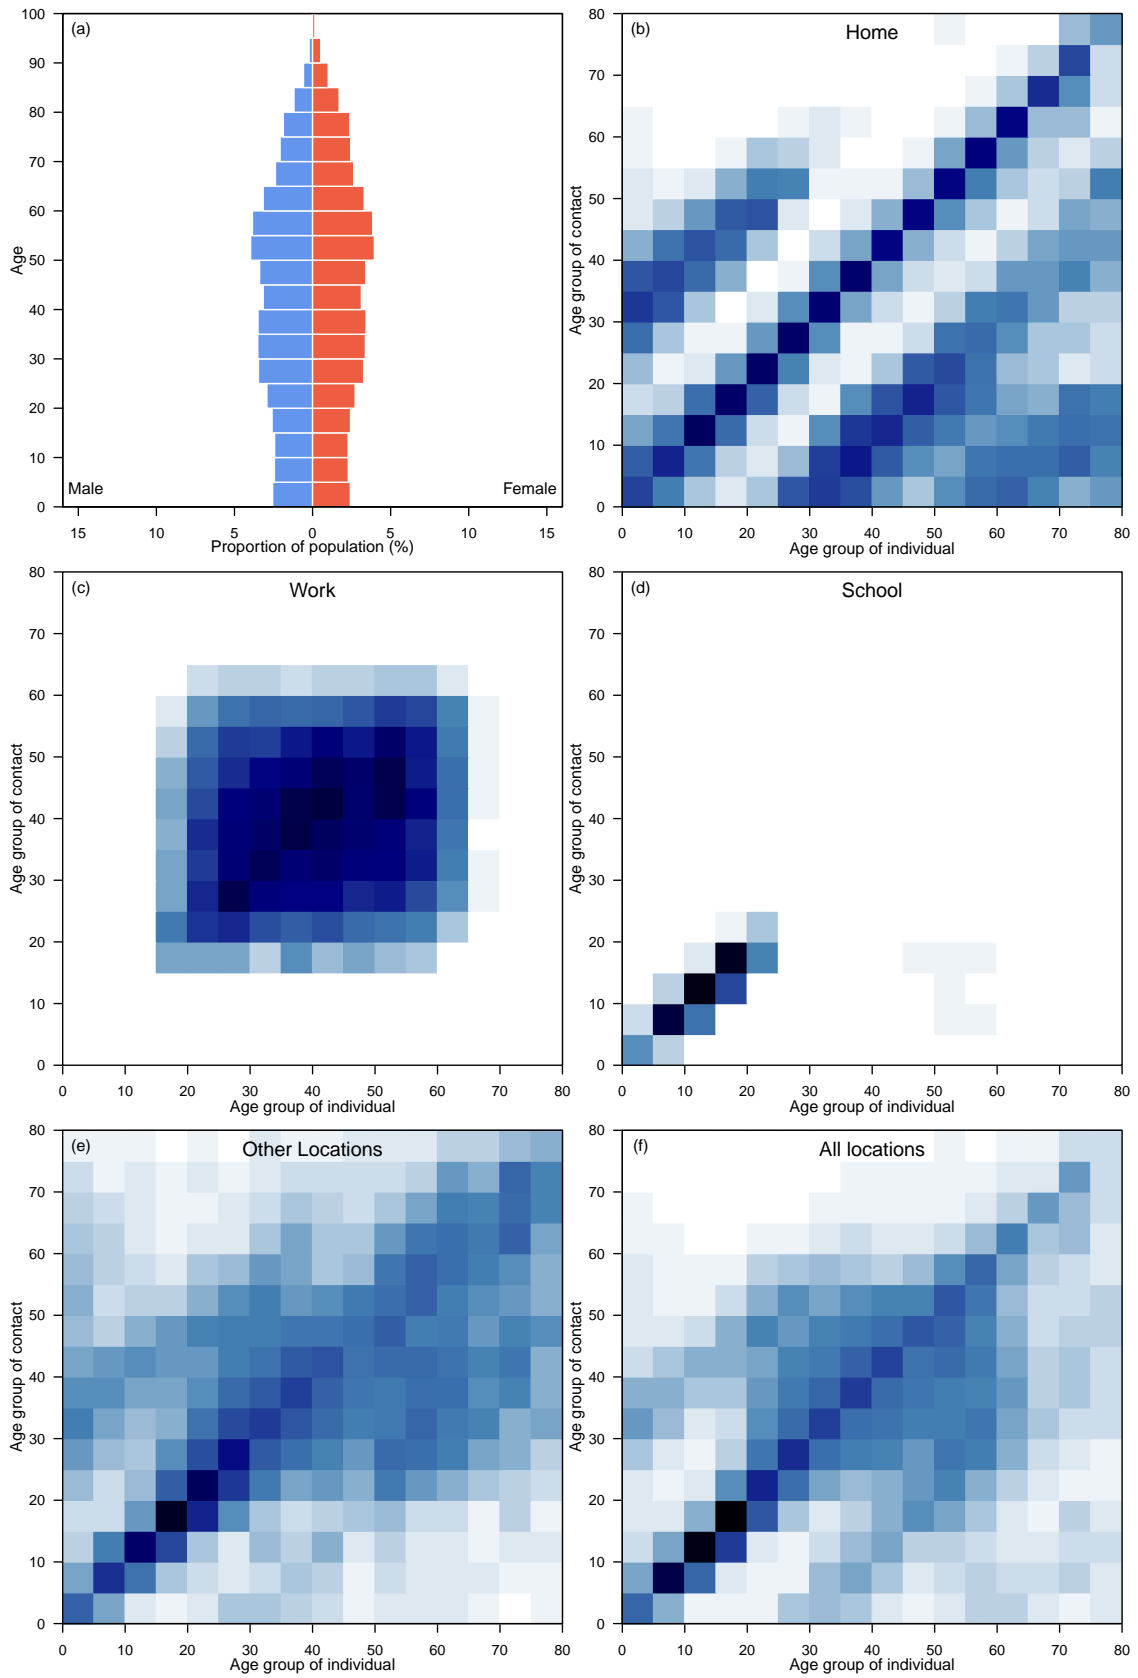

# Azerbaijan

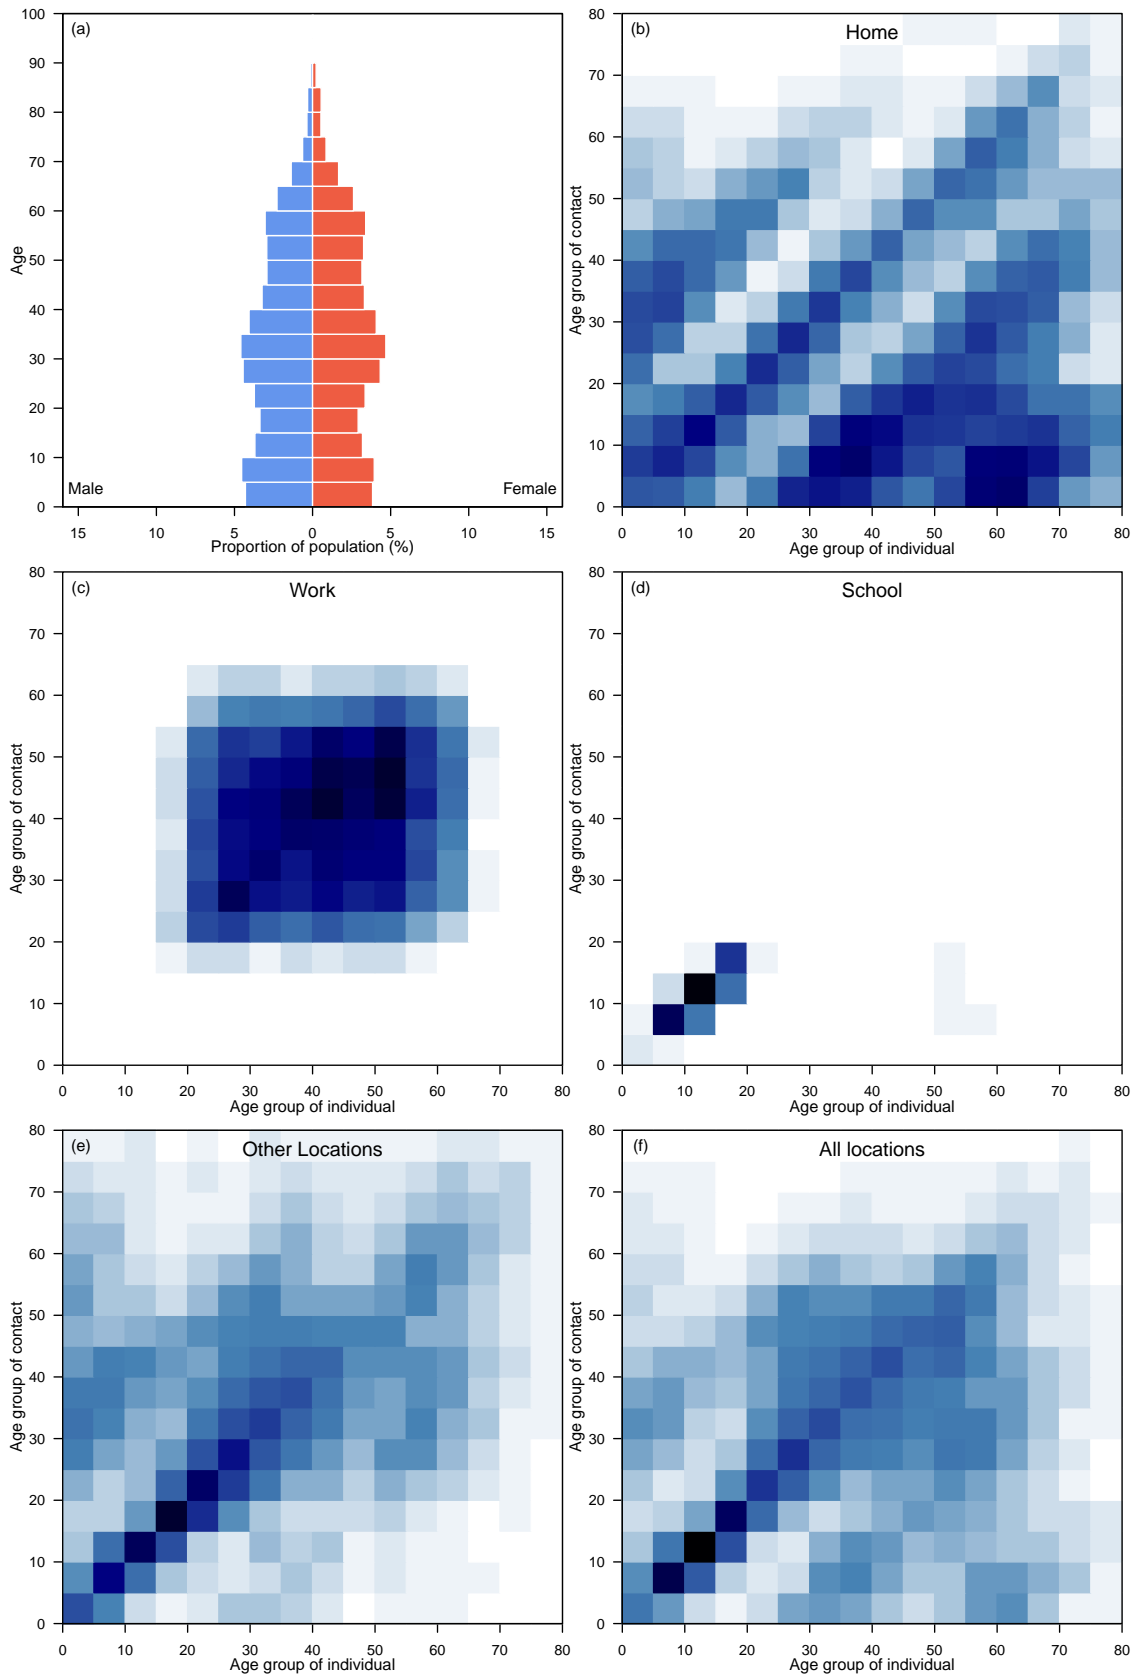

# Bahamas

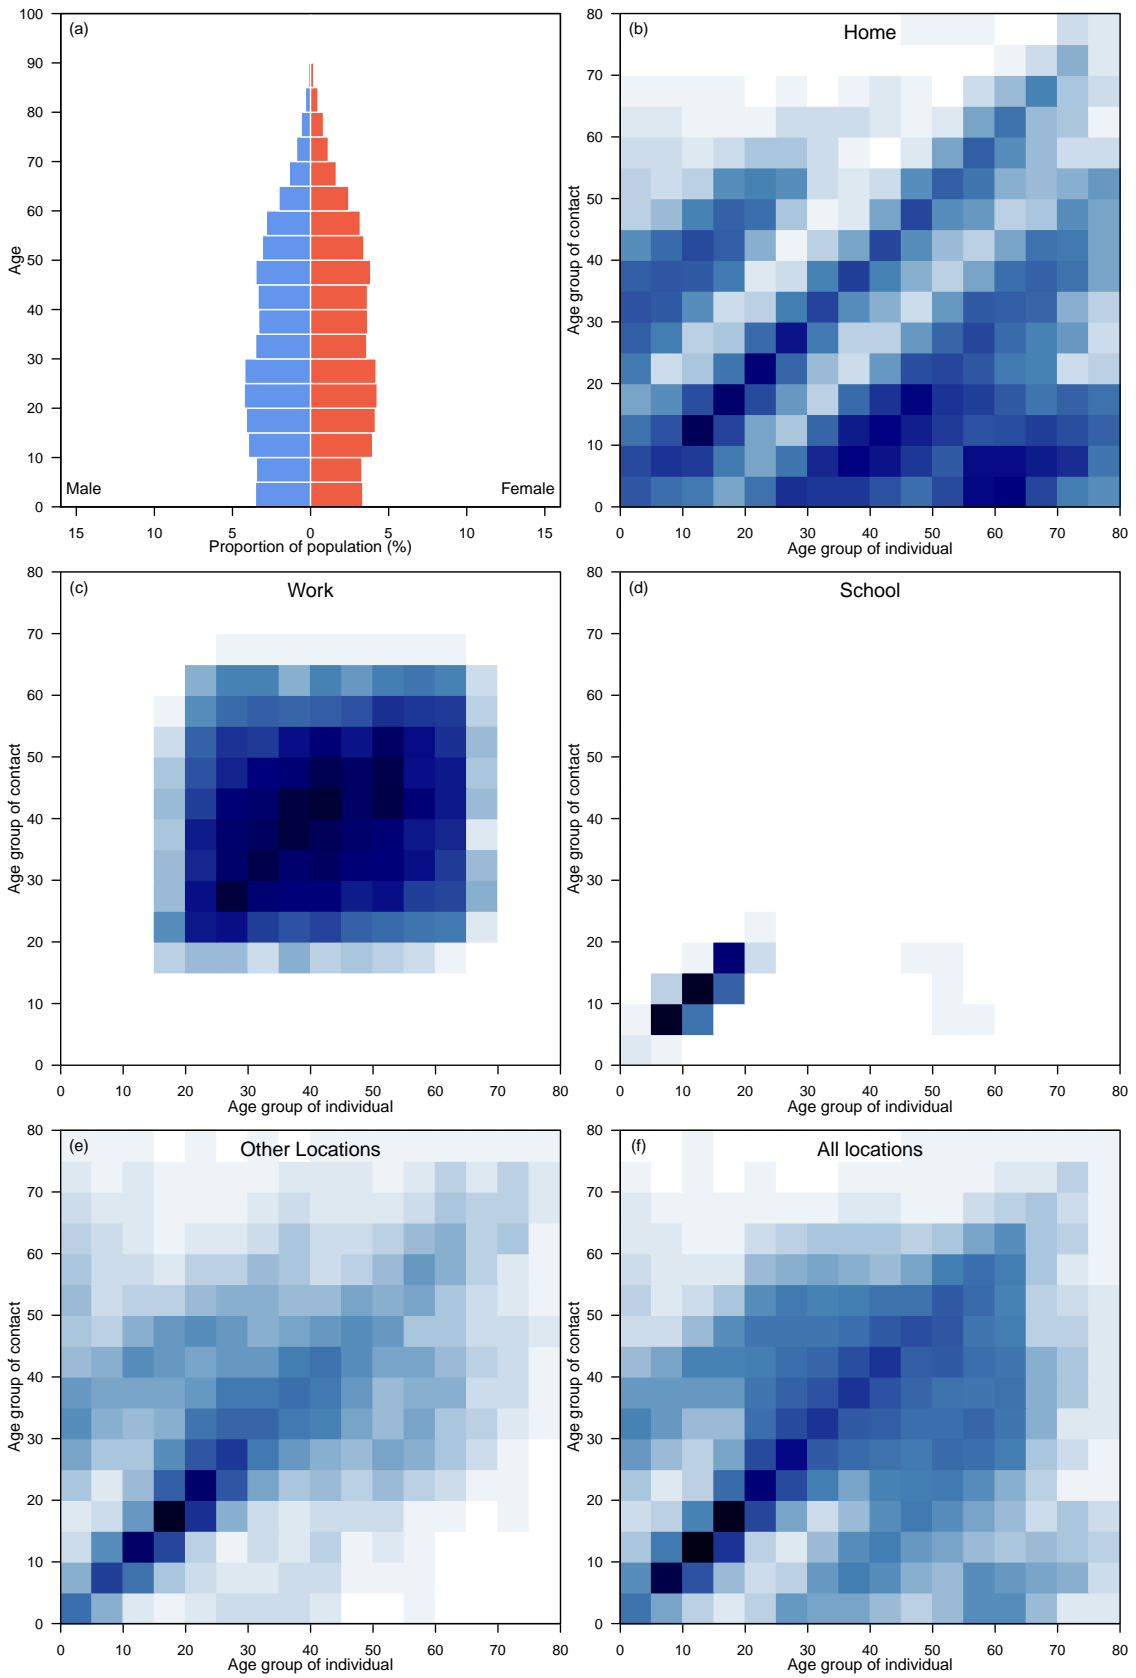



# Bahrain

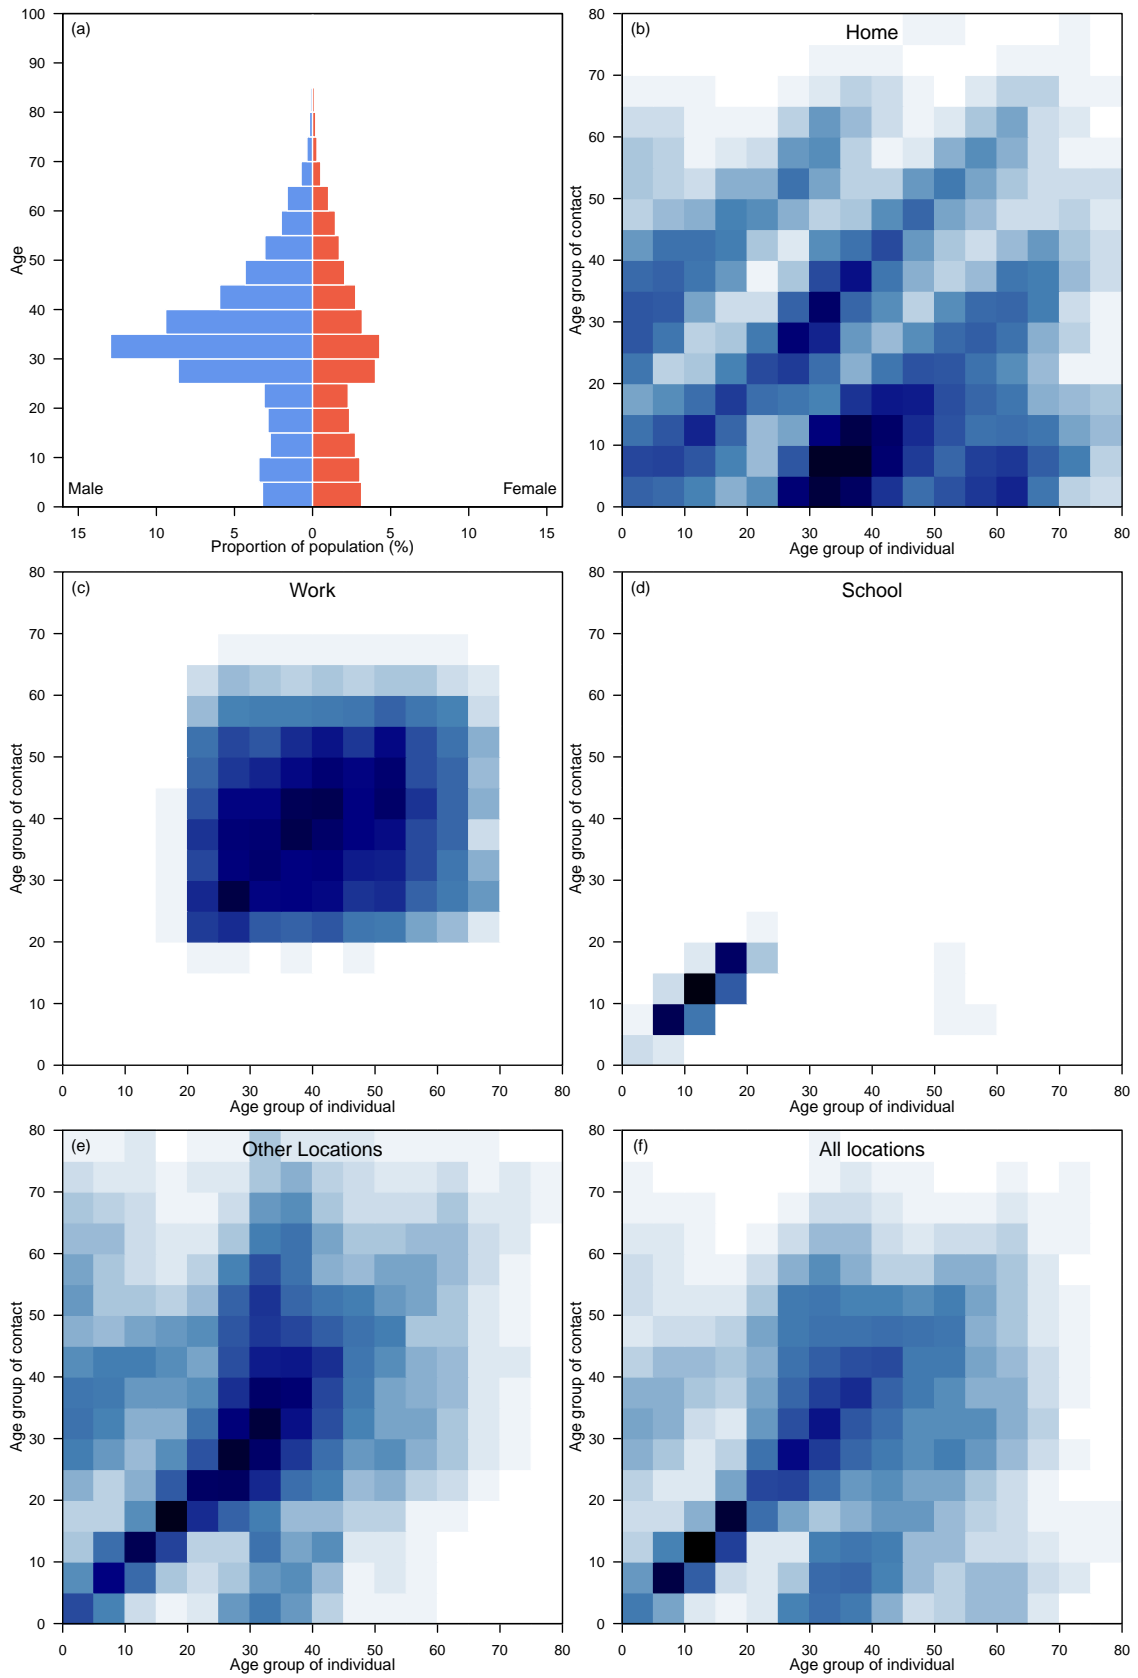

# Bangladesh

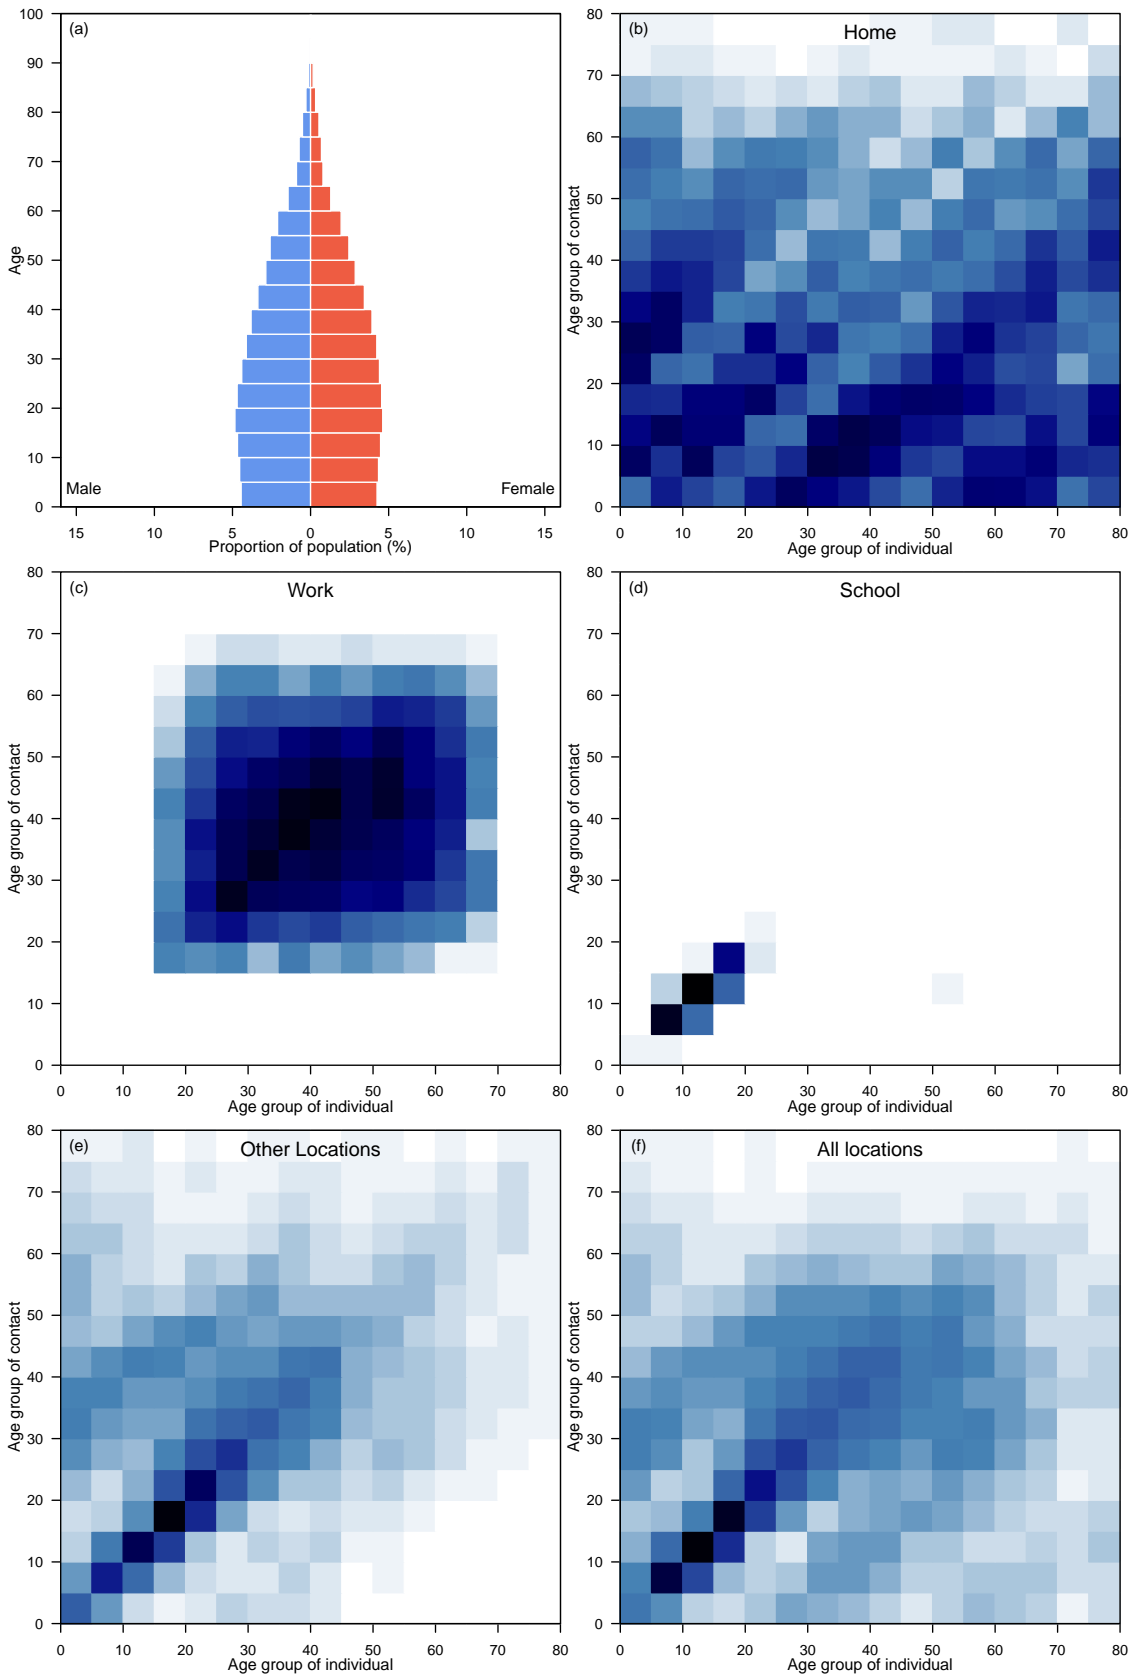

# Barbados

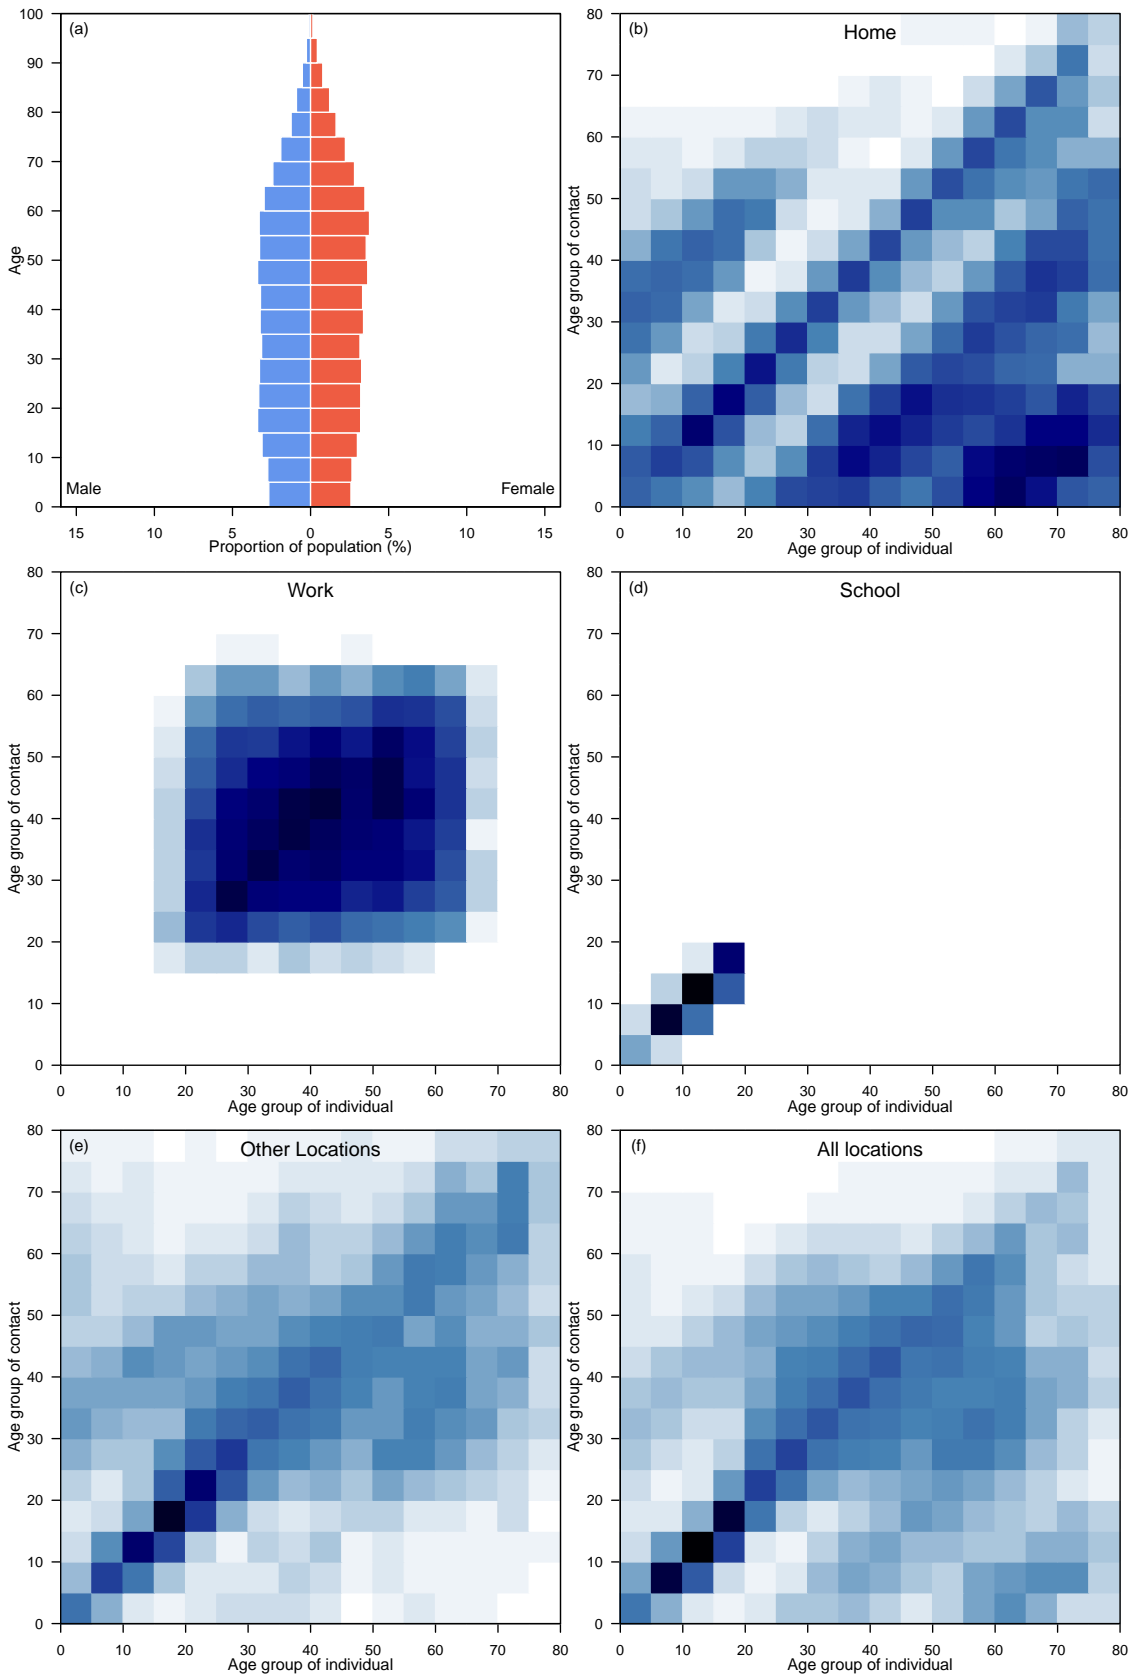

# Belarus

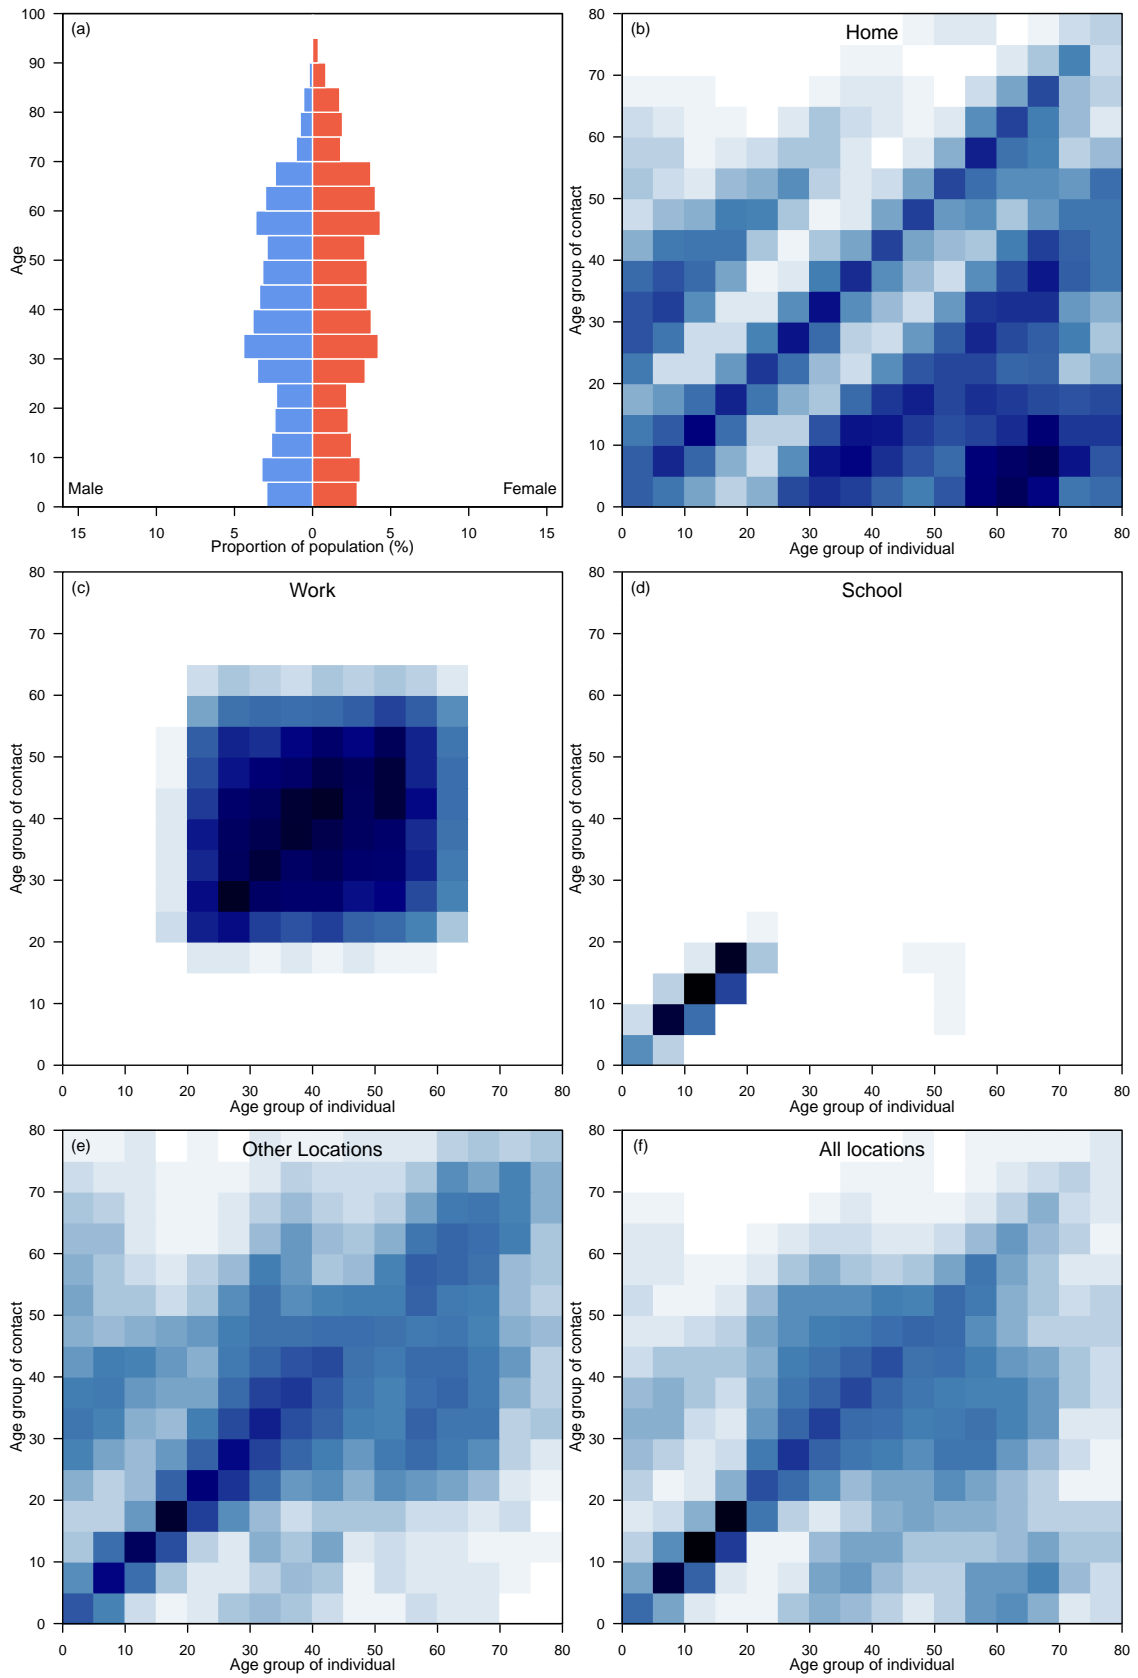

# Belgium

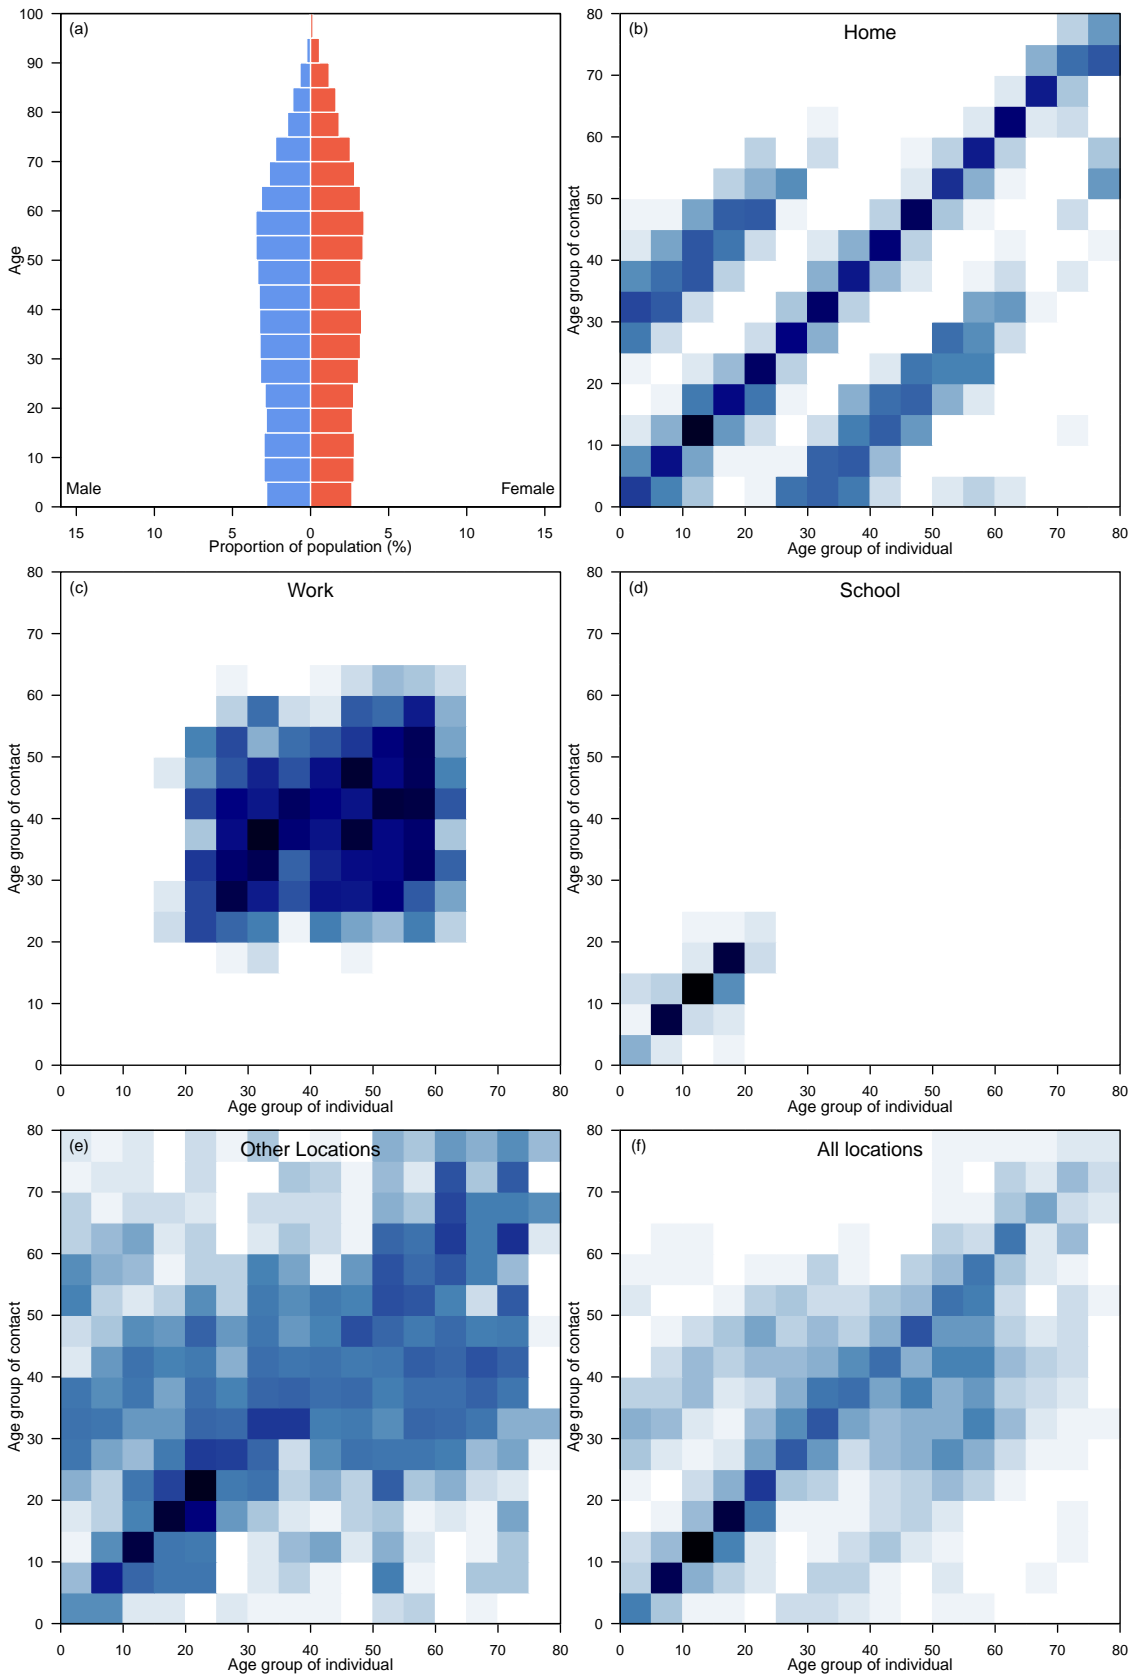

# Belize

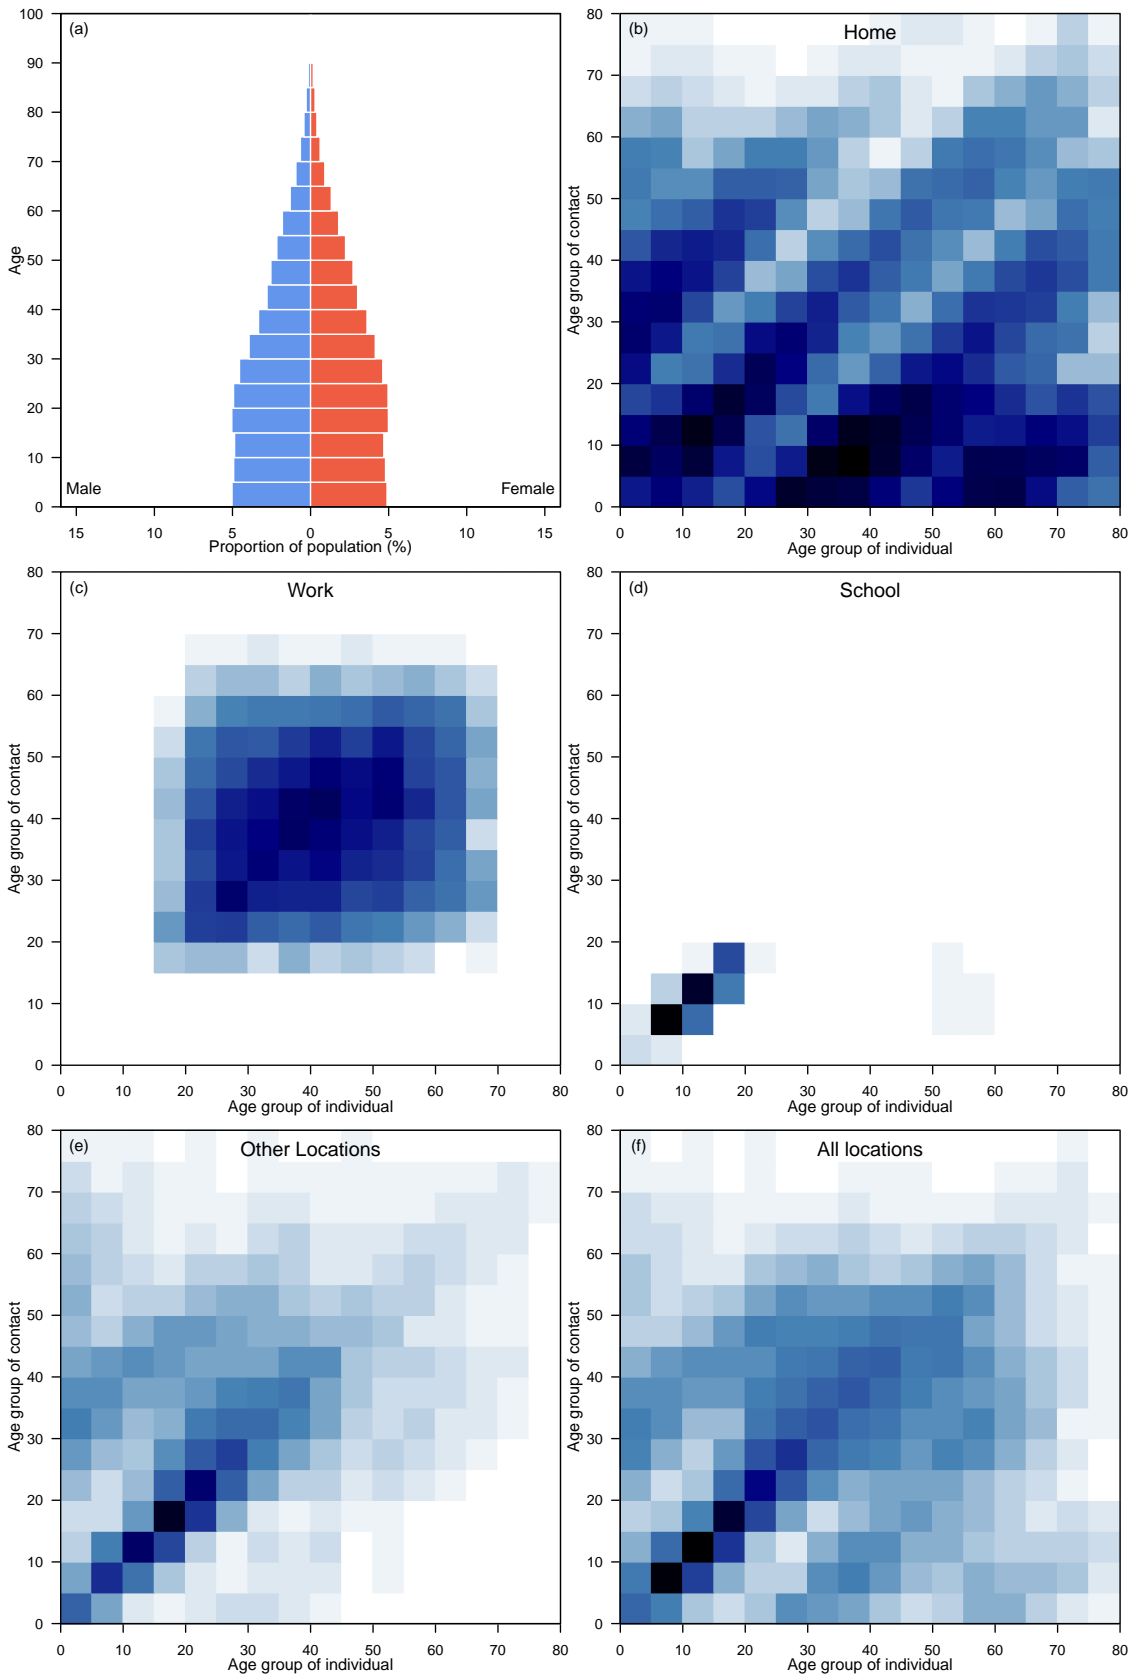

# Benin

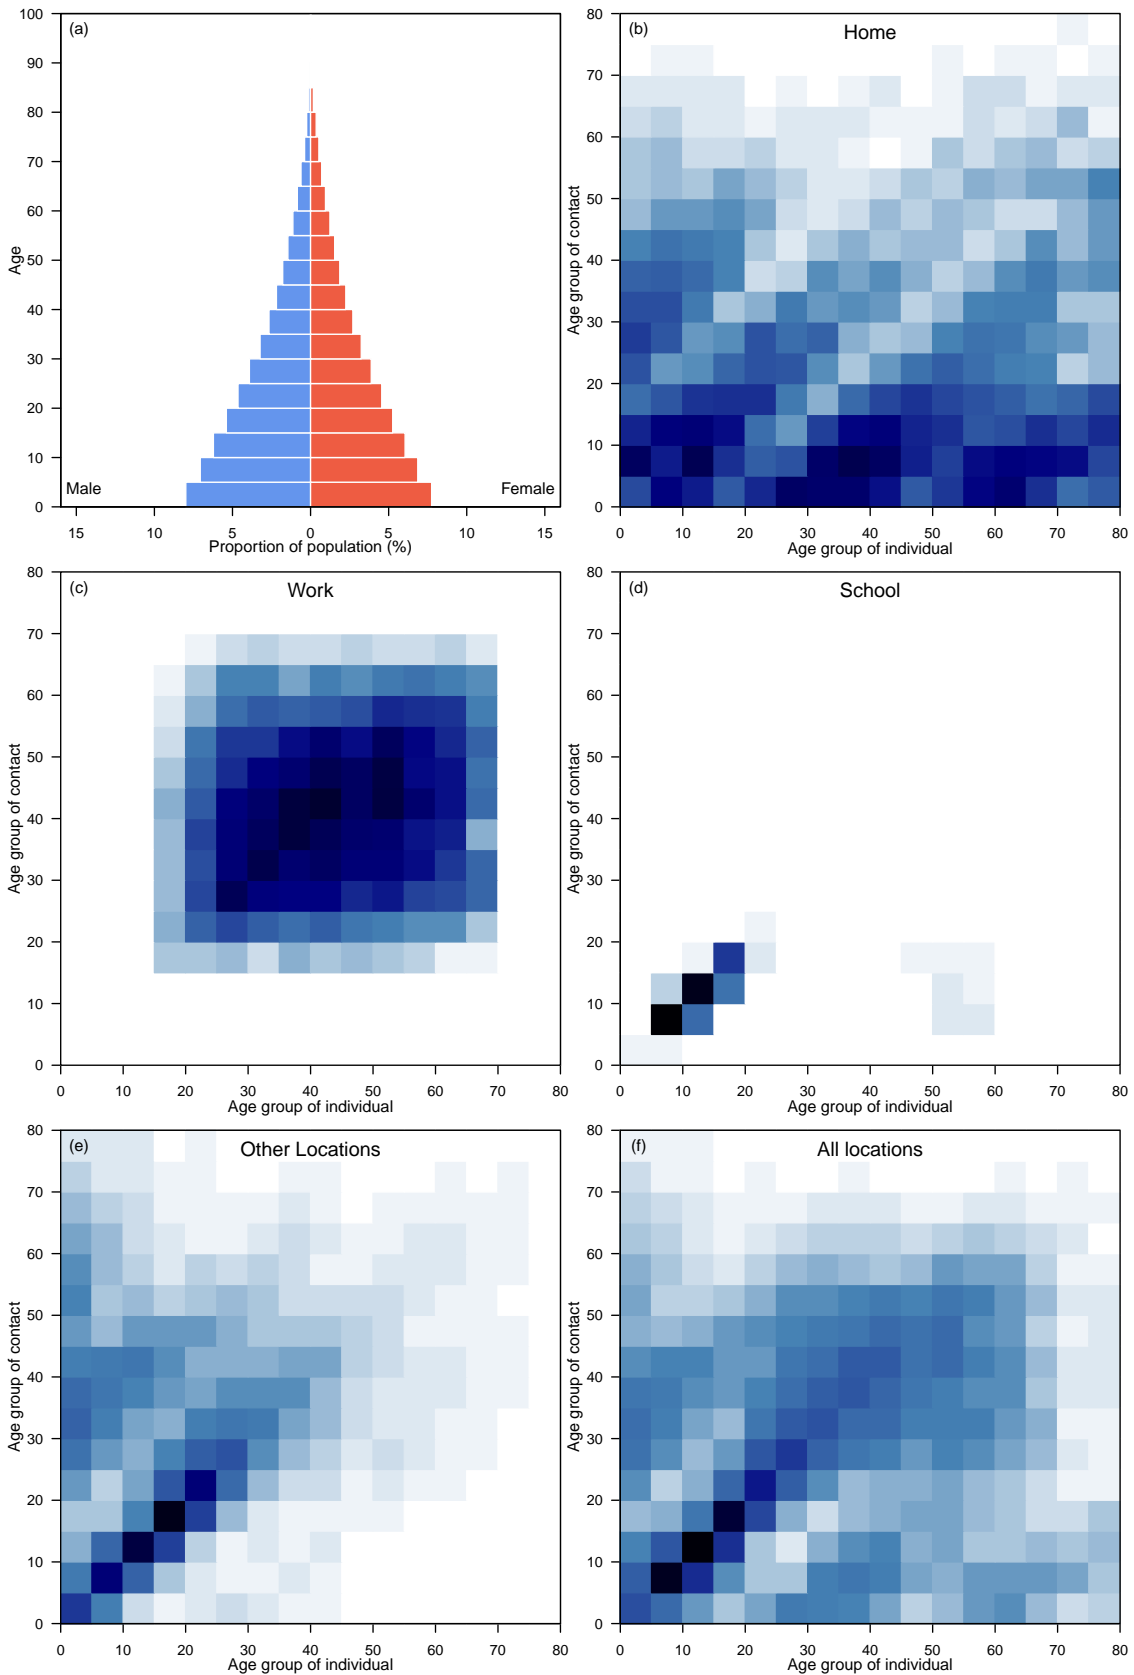

# Bhutan

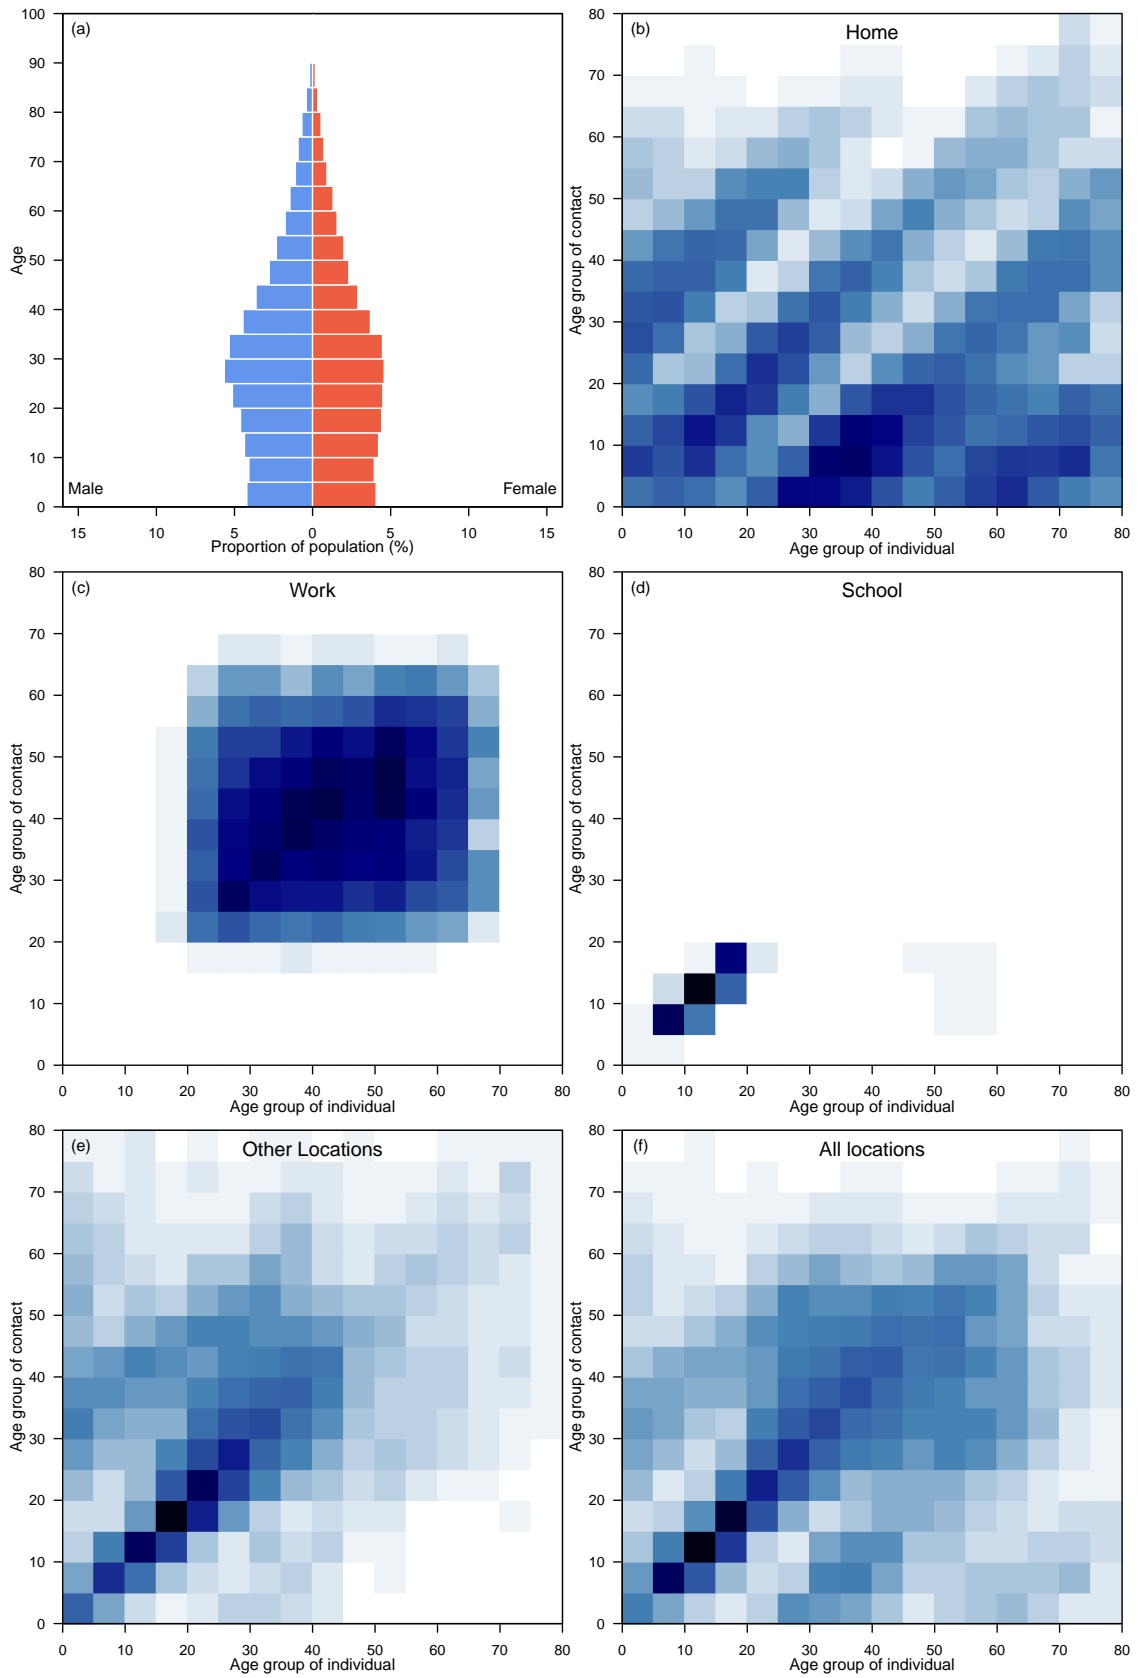



# Bolivia (Plurinational State of)

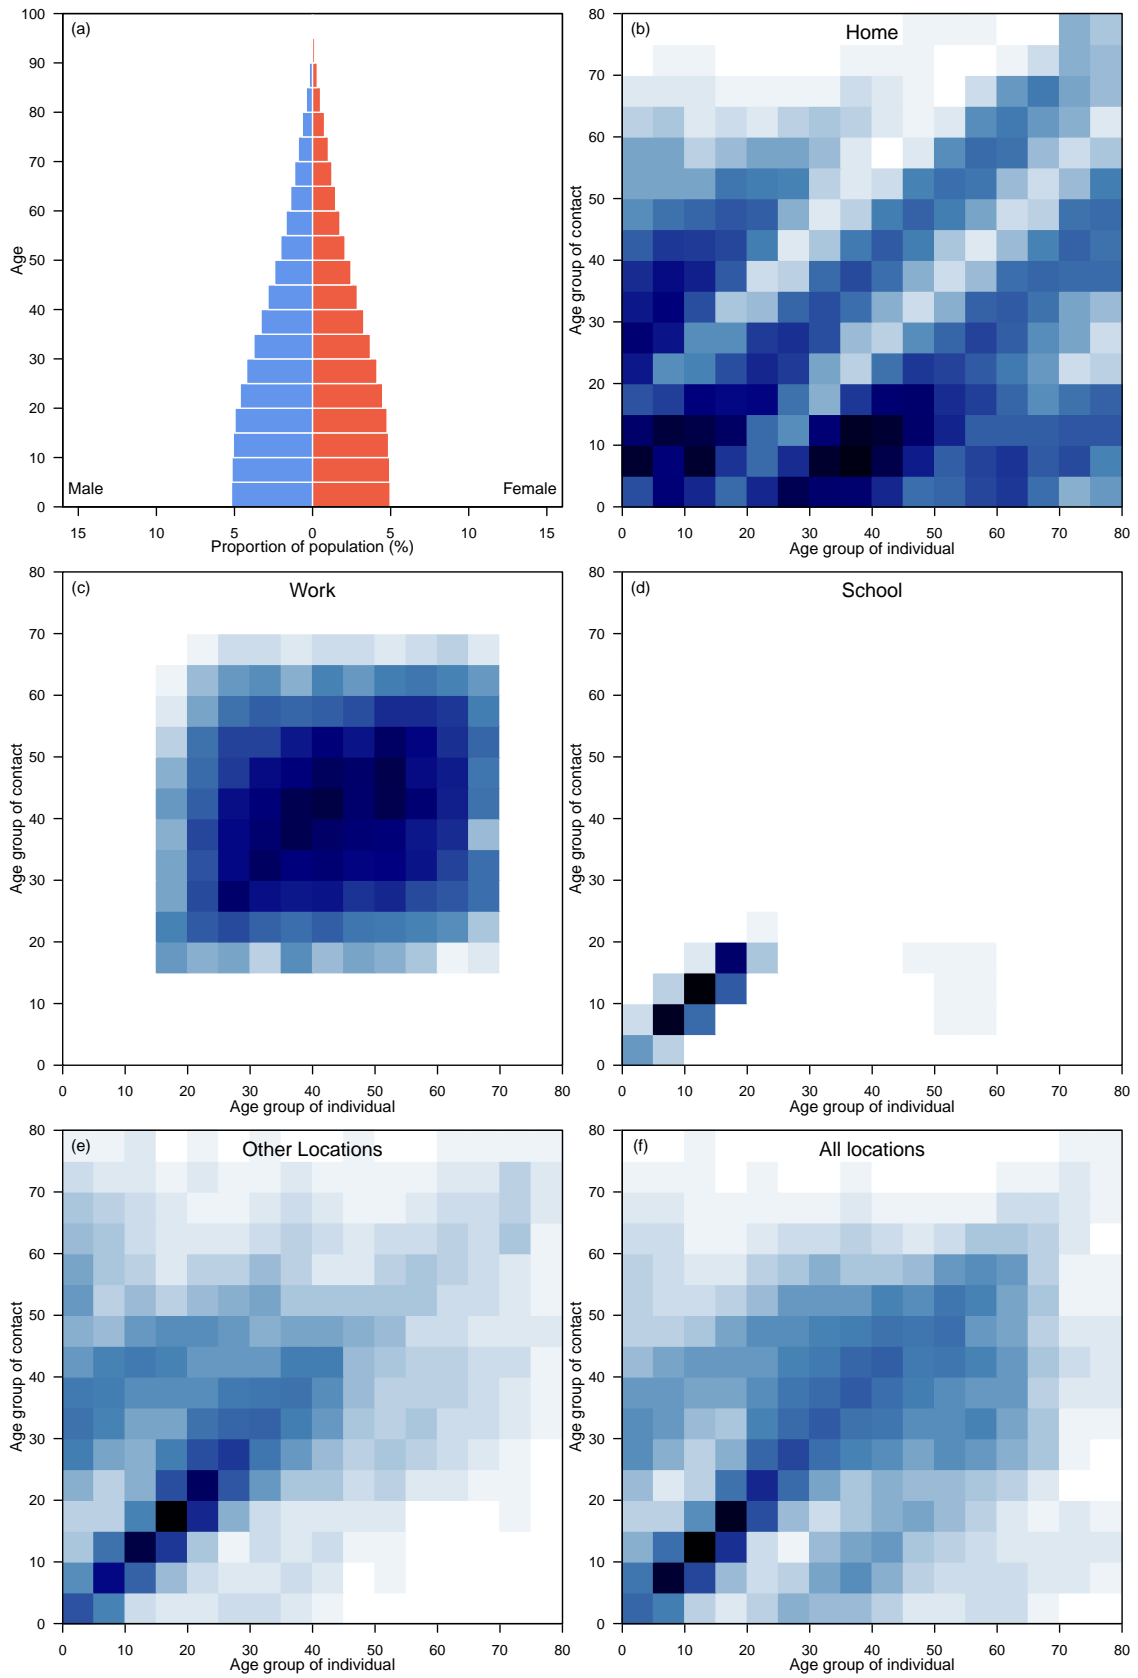

# Bosnia and Herzegovina

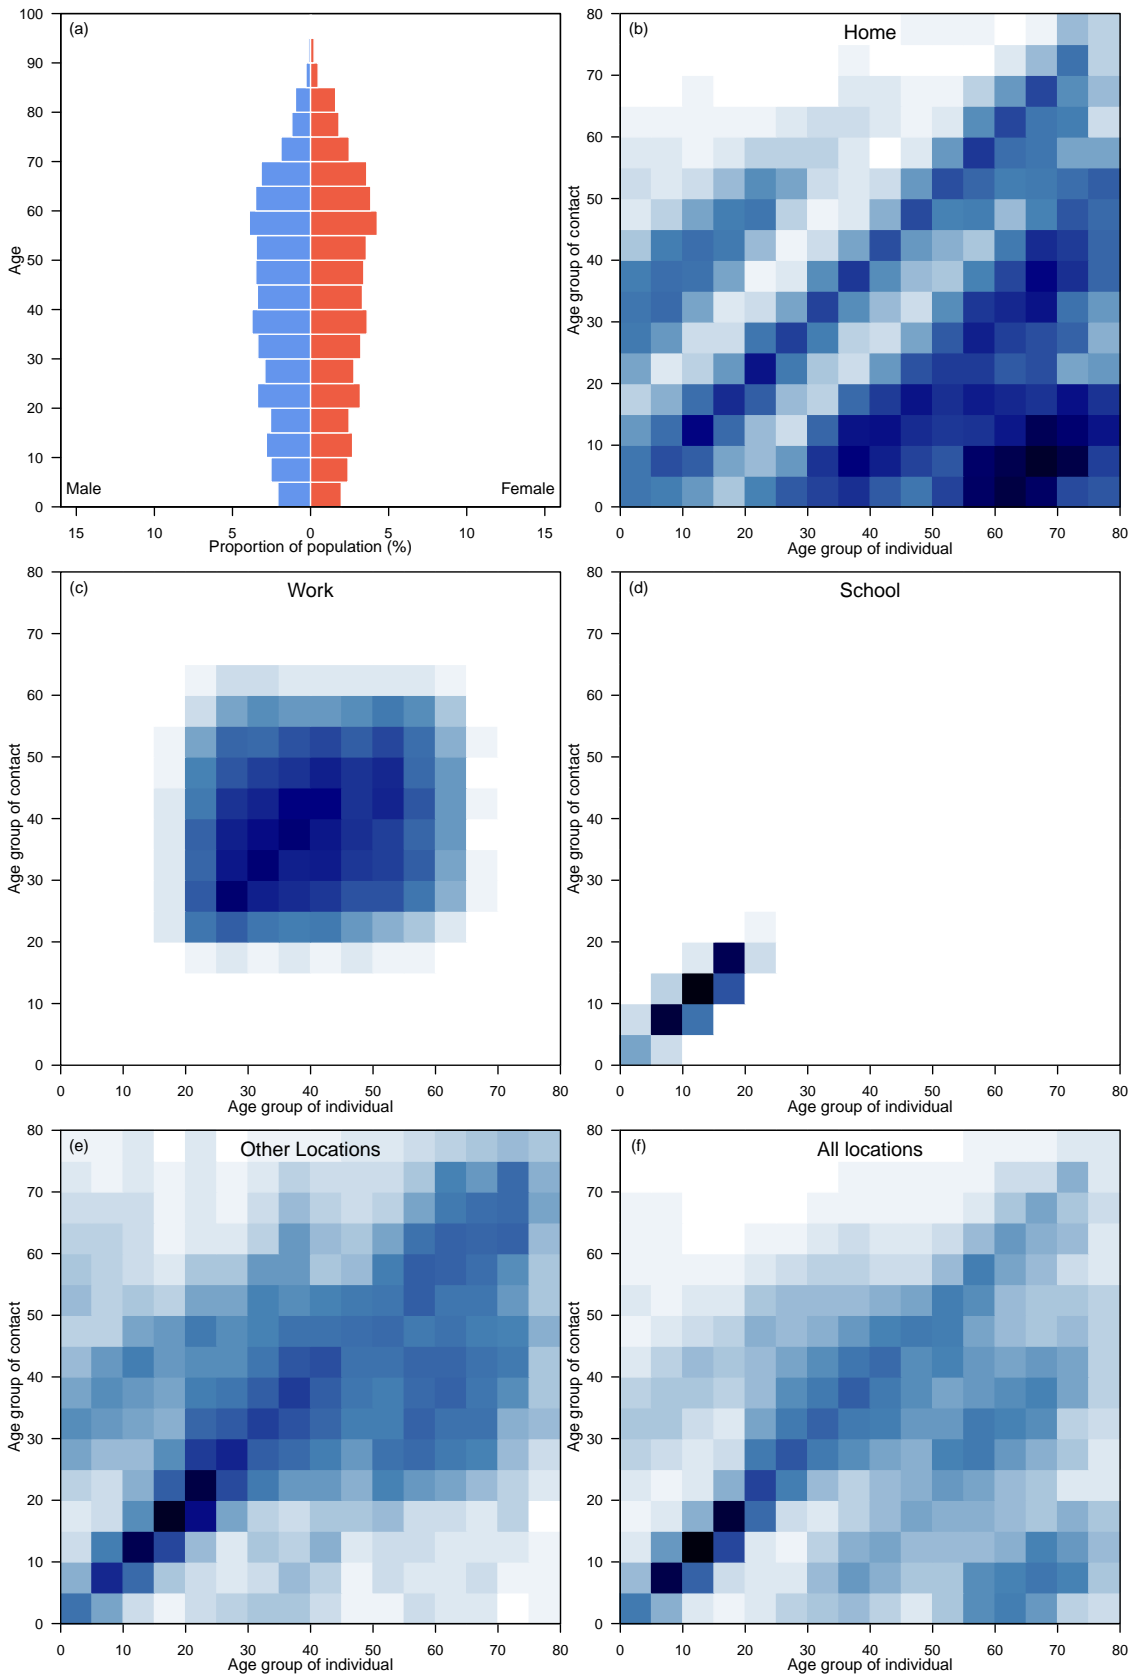

# Botswana

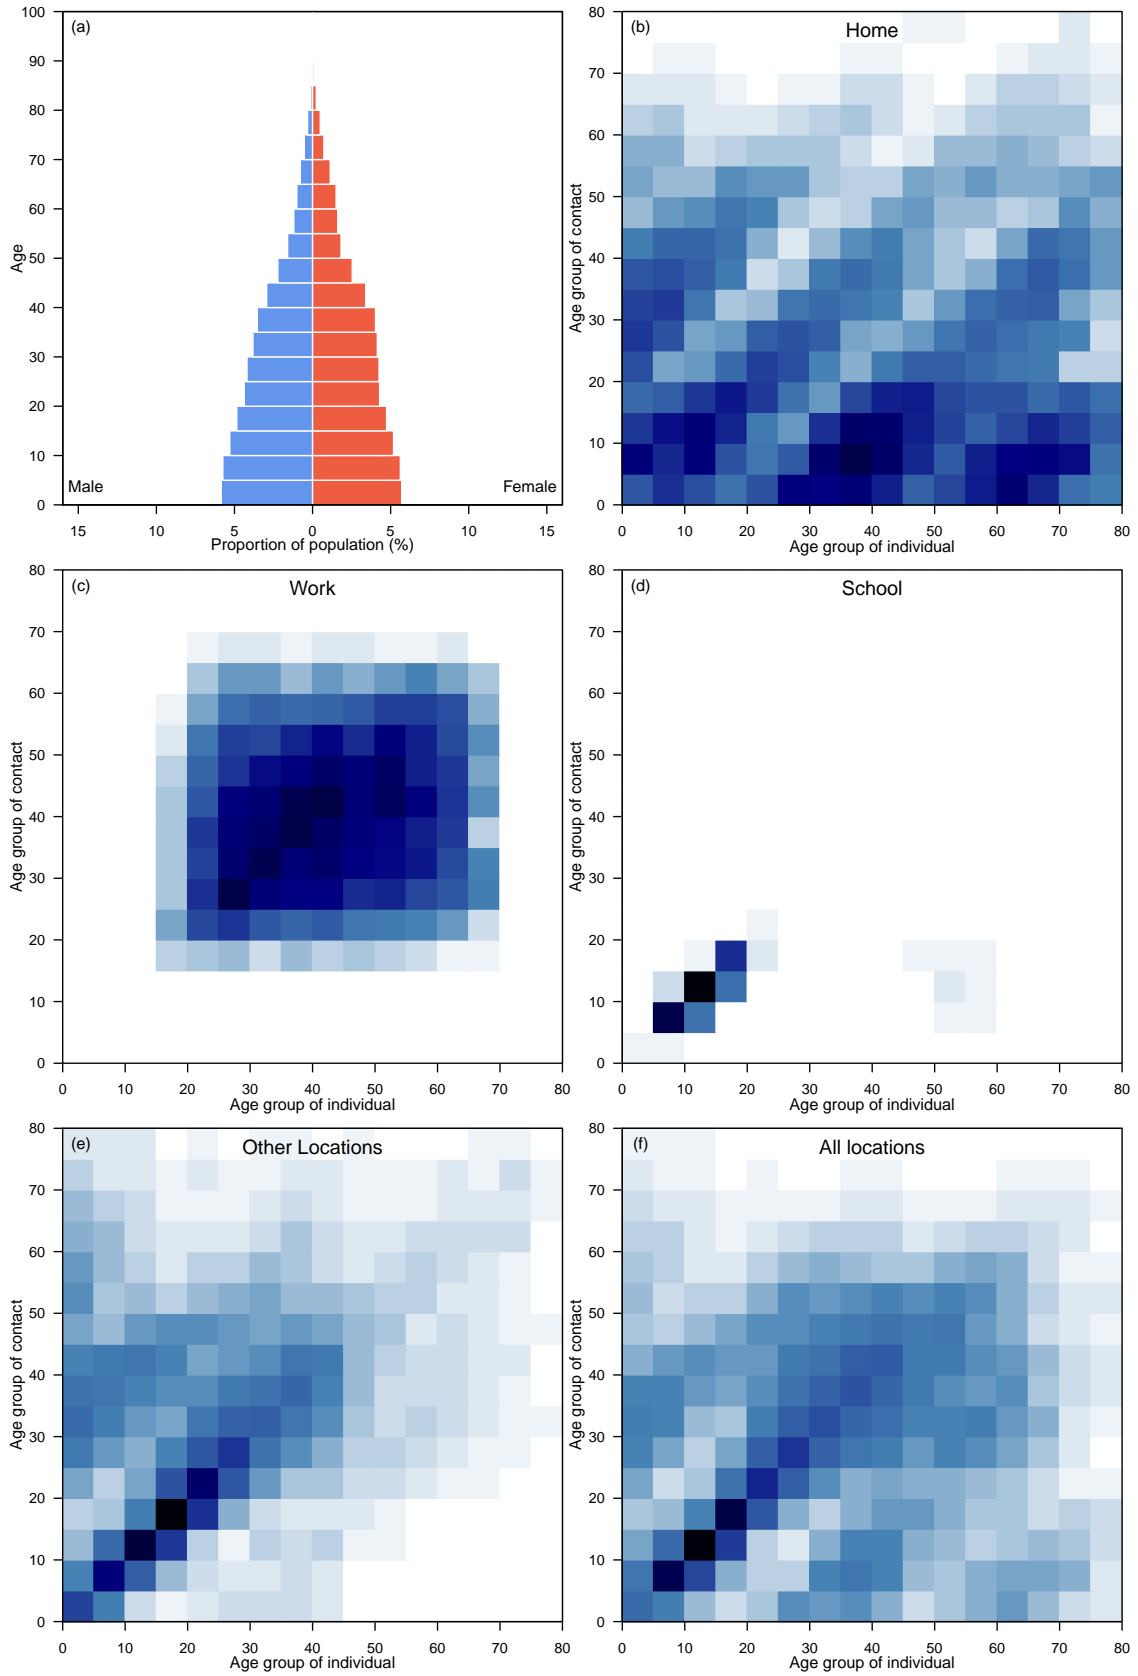

# Brazil

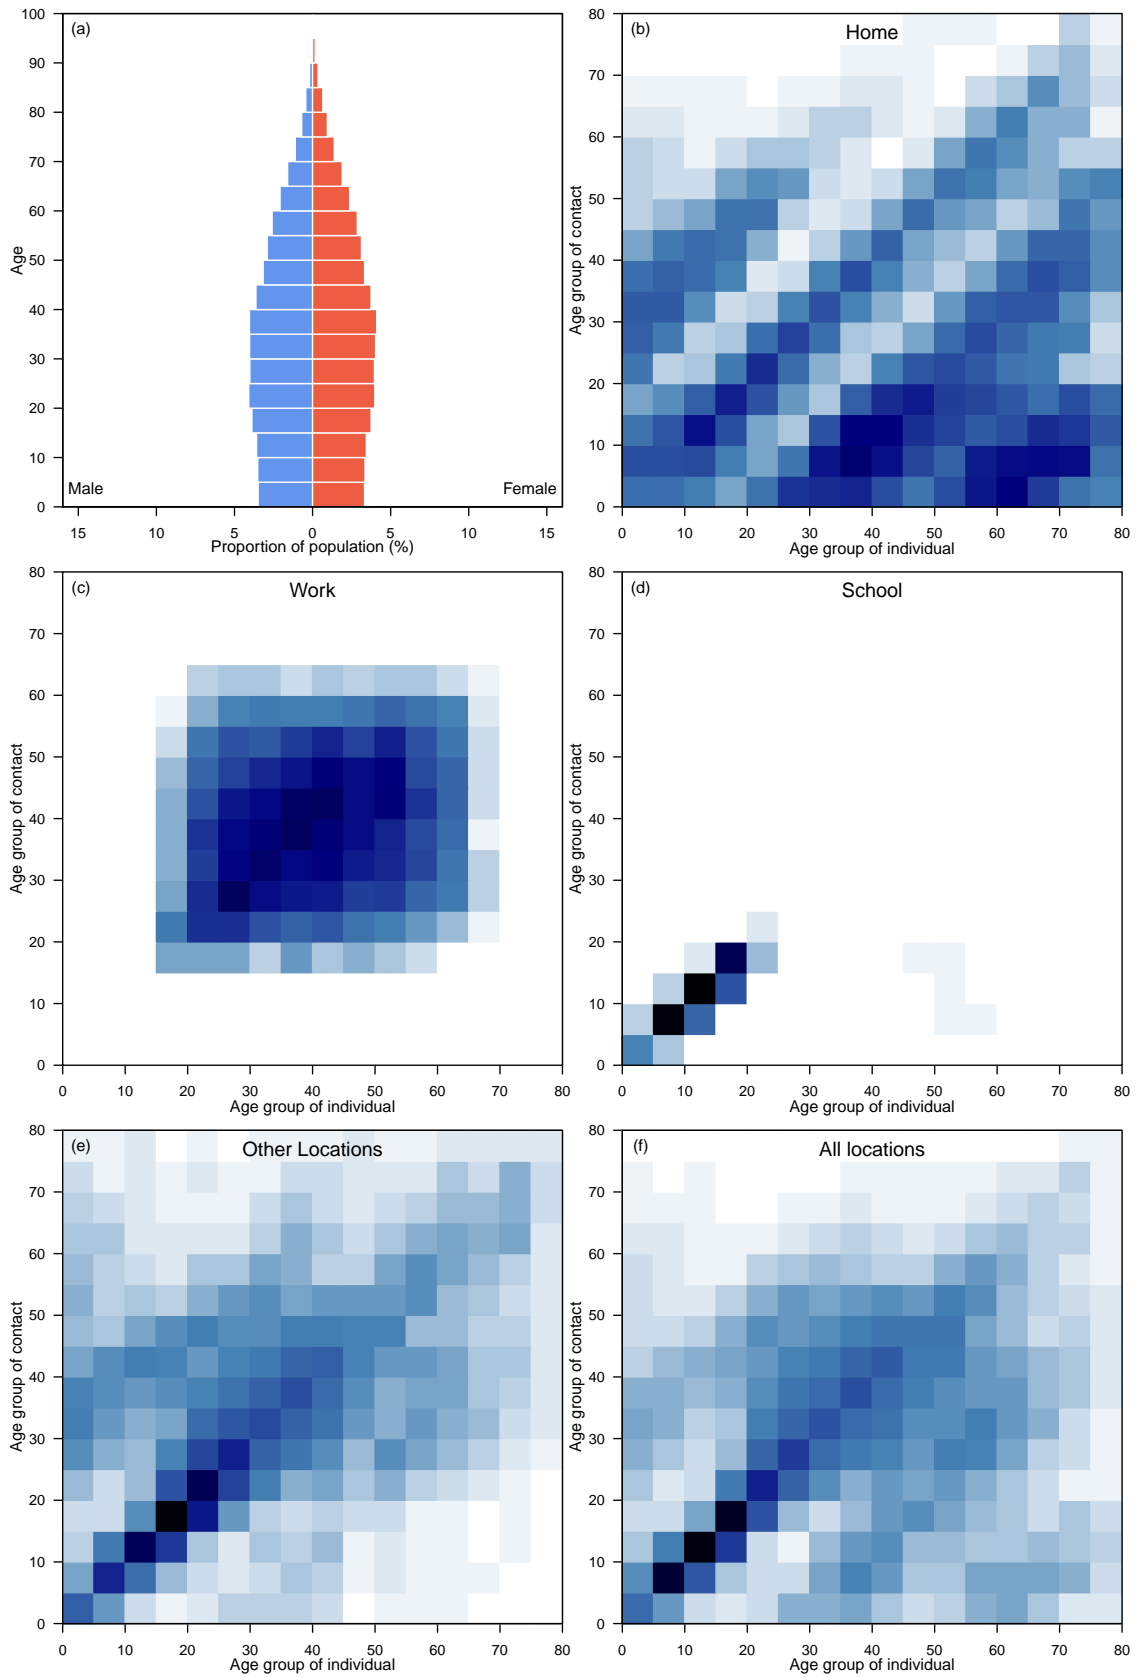

# Brunei Darussalam

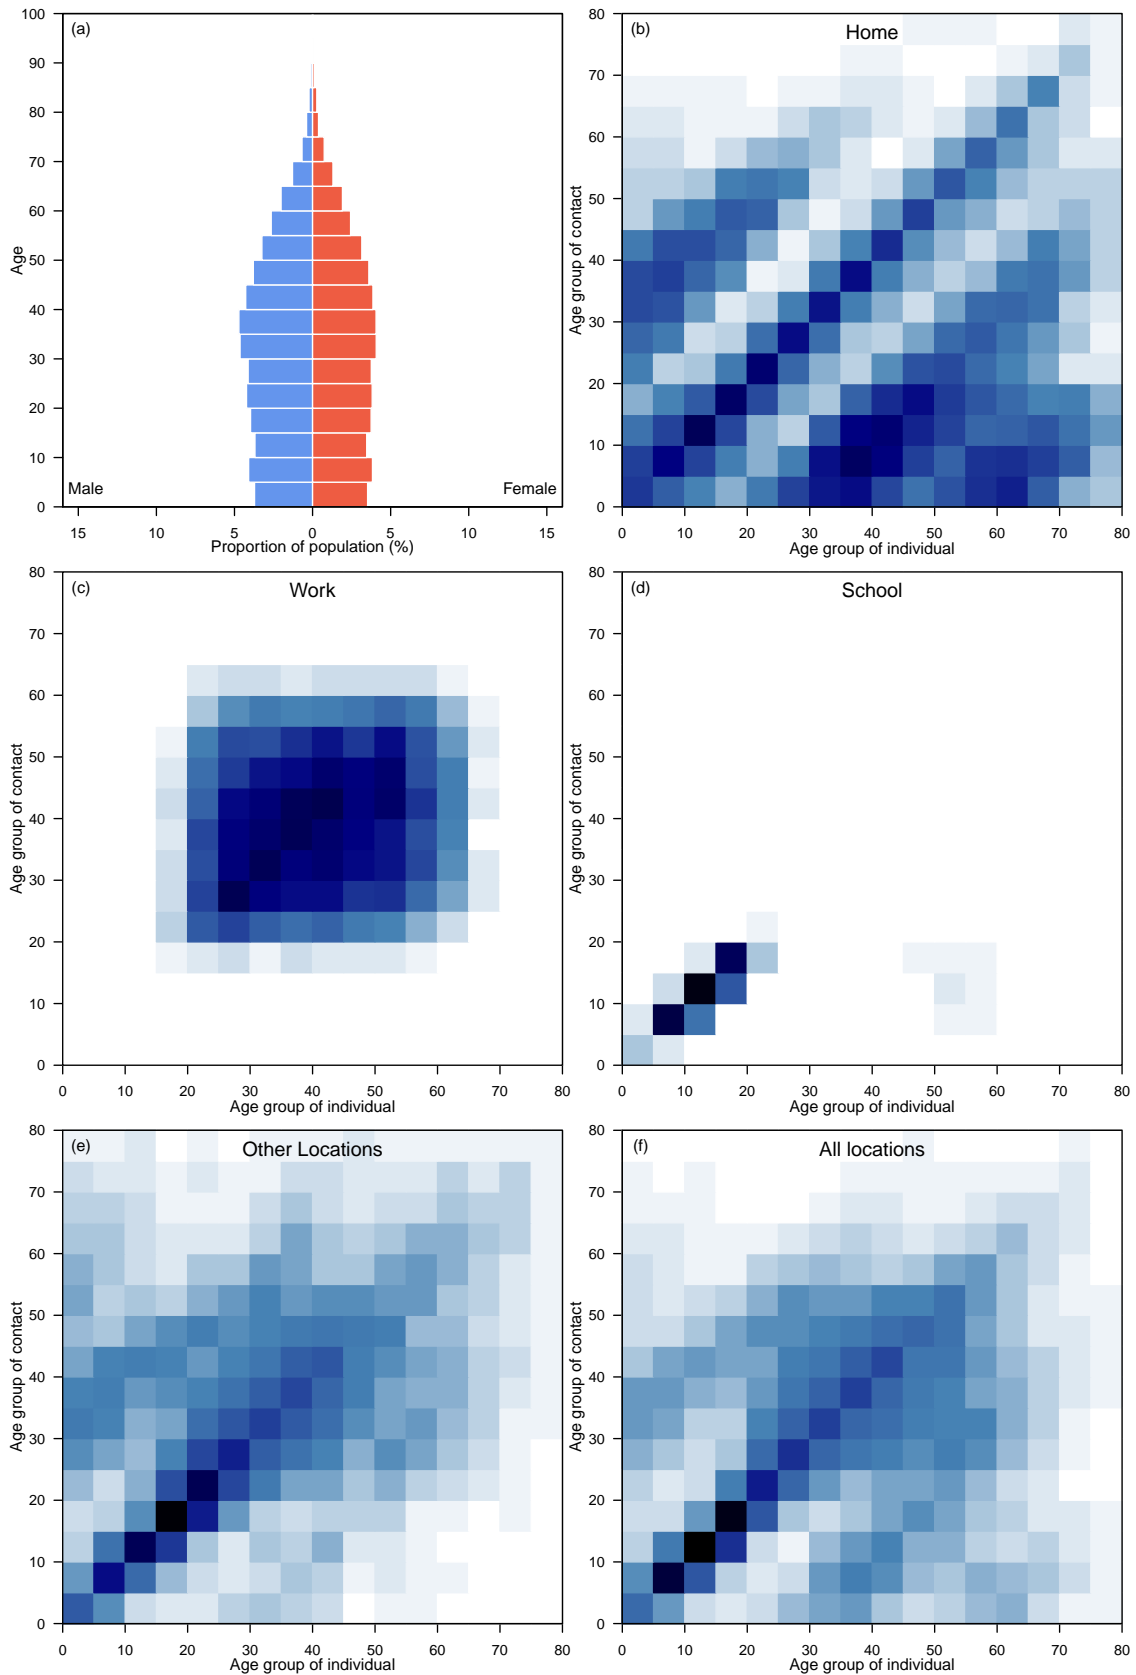

# Bulgaria

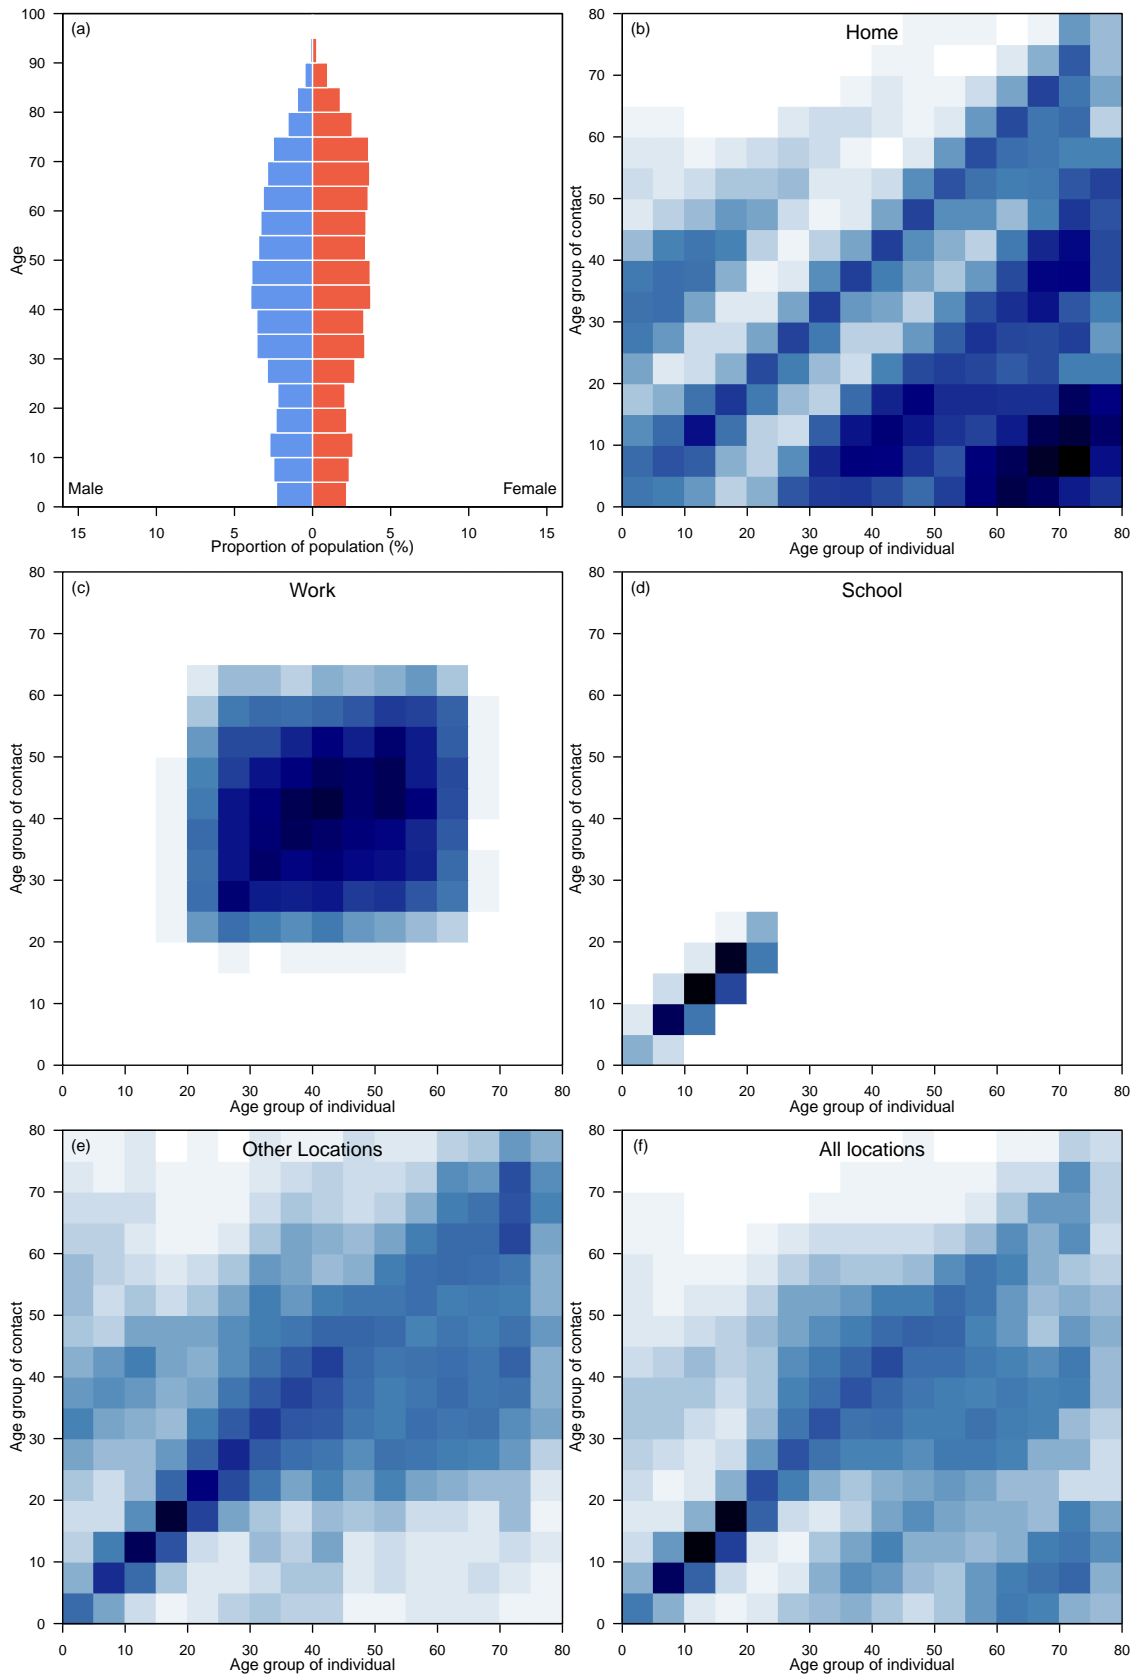

# Burkina Faso

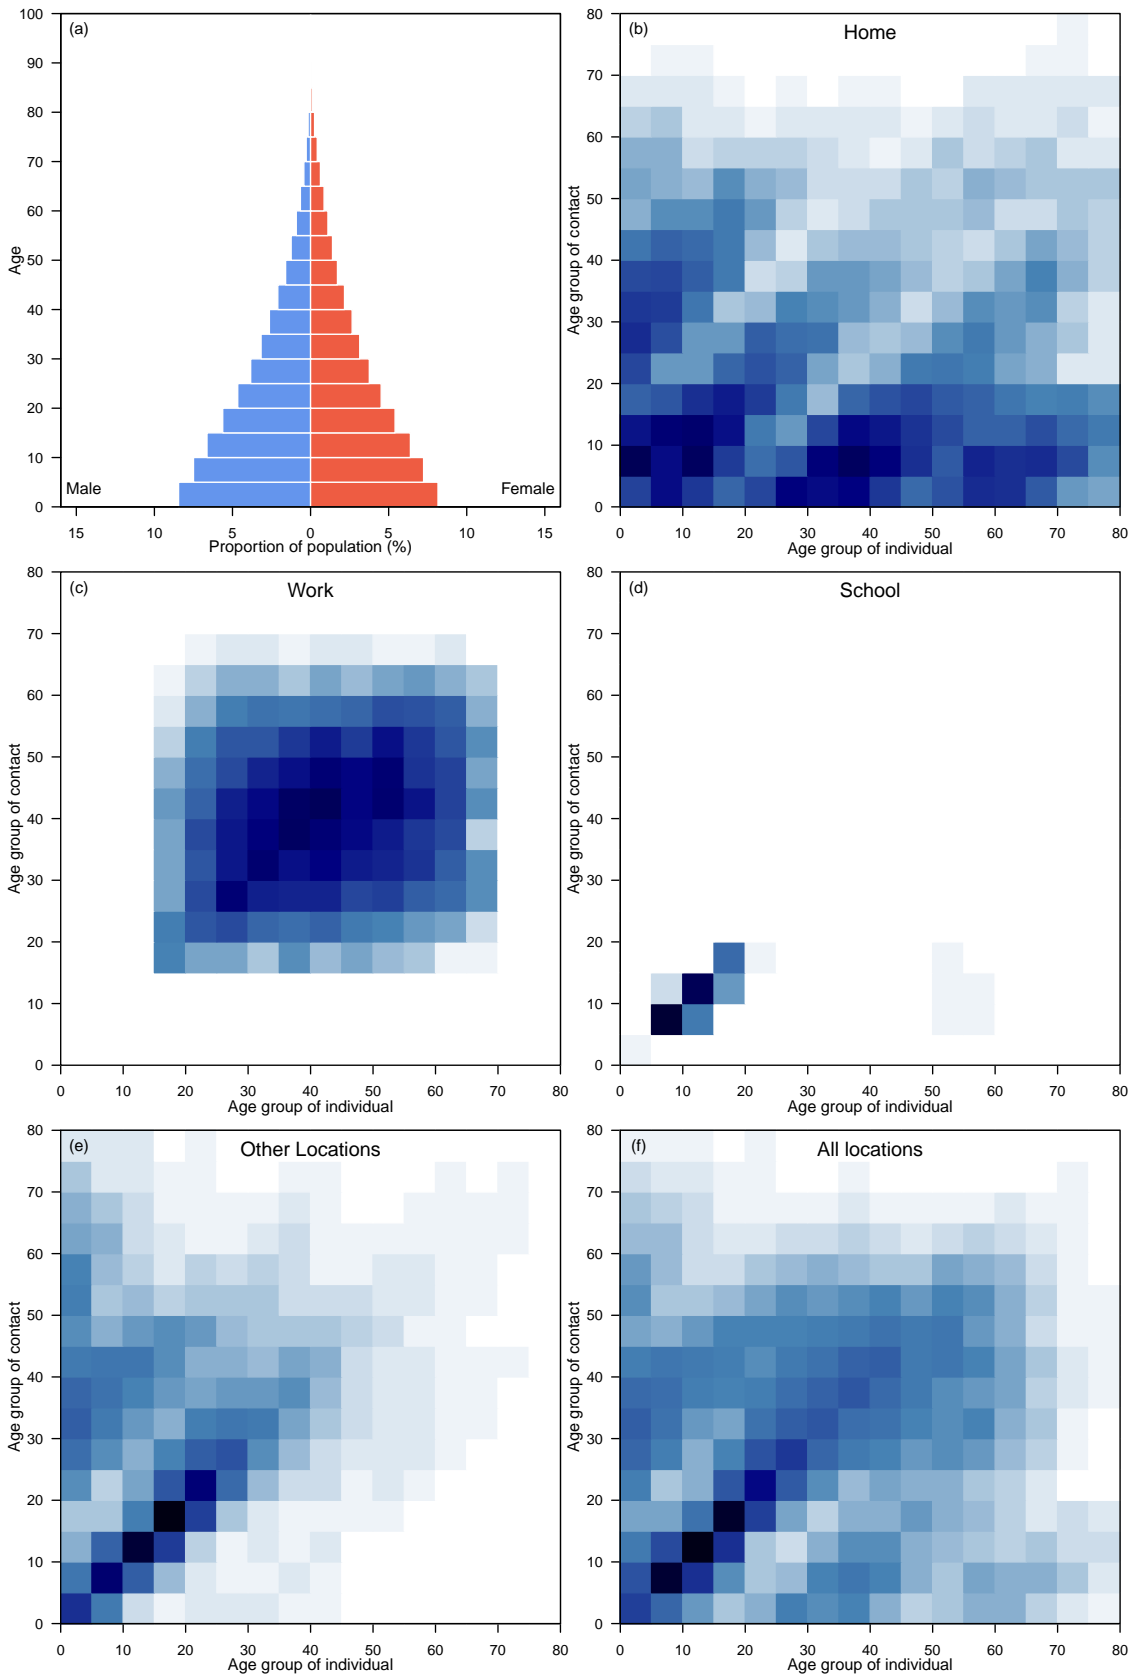

# Burundi

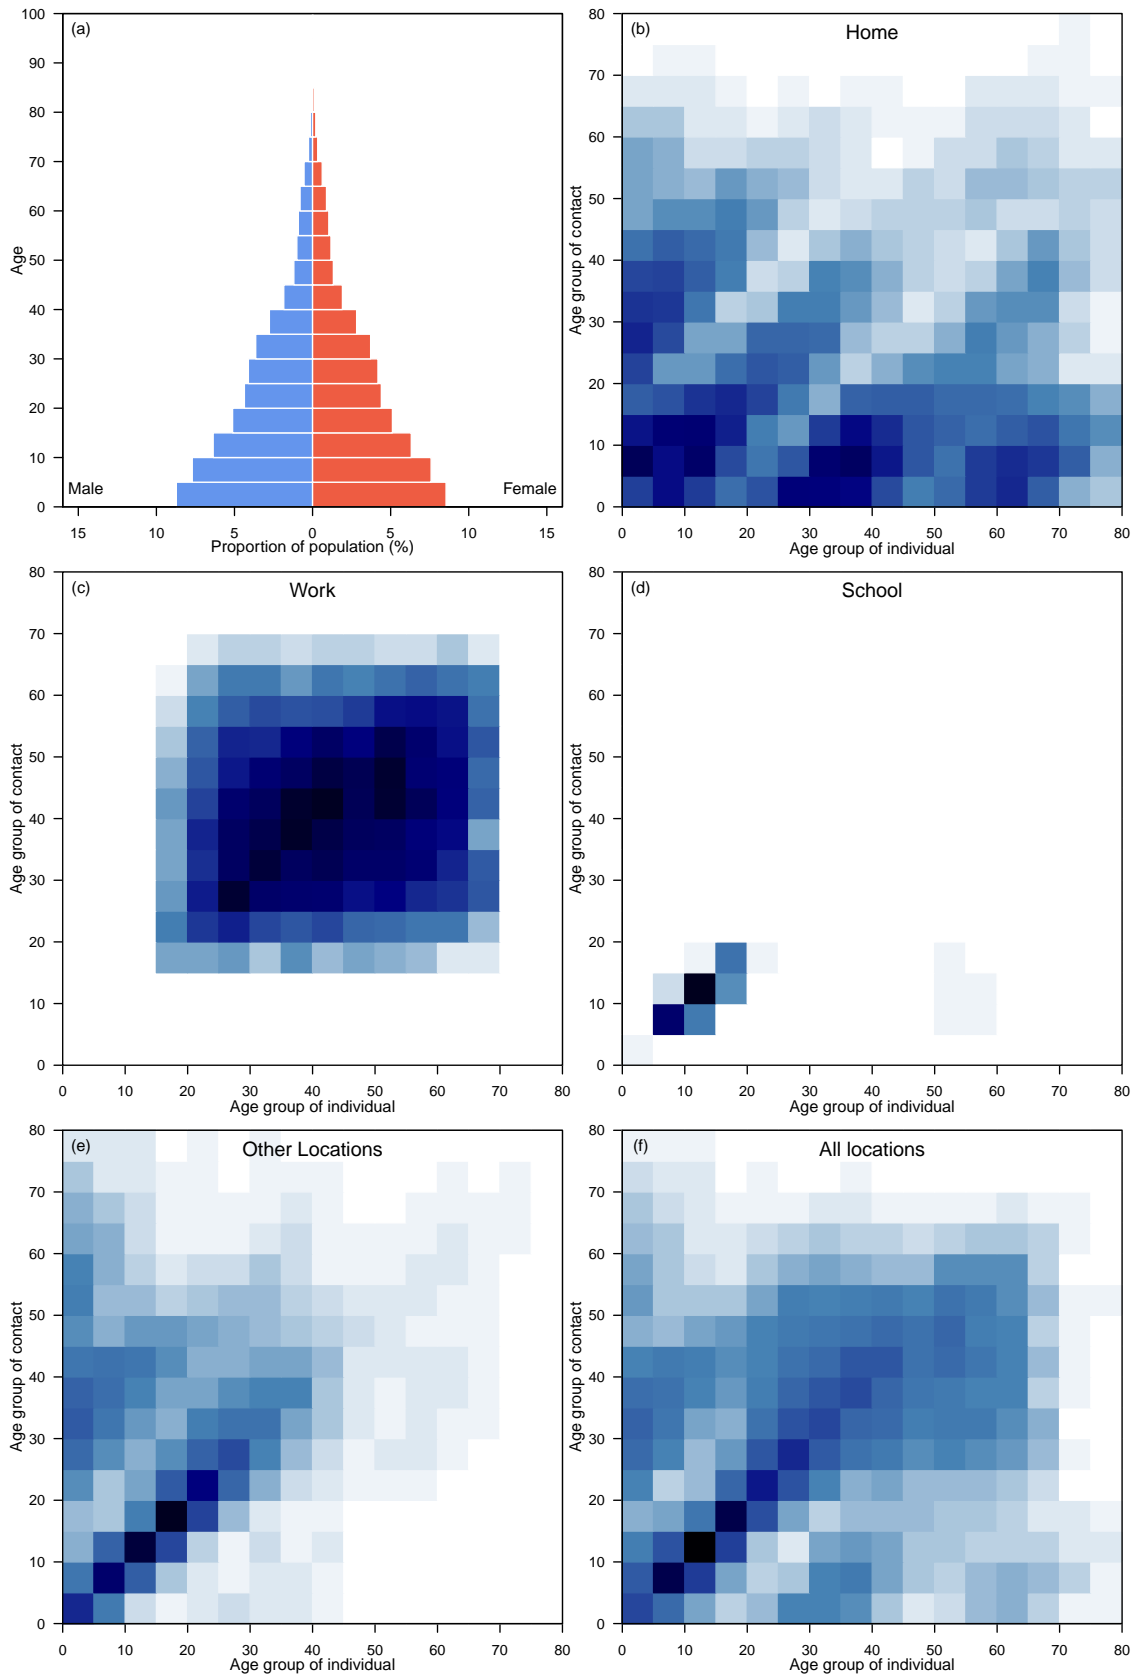



# Cabo Verde

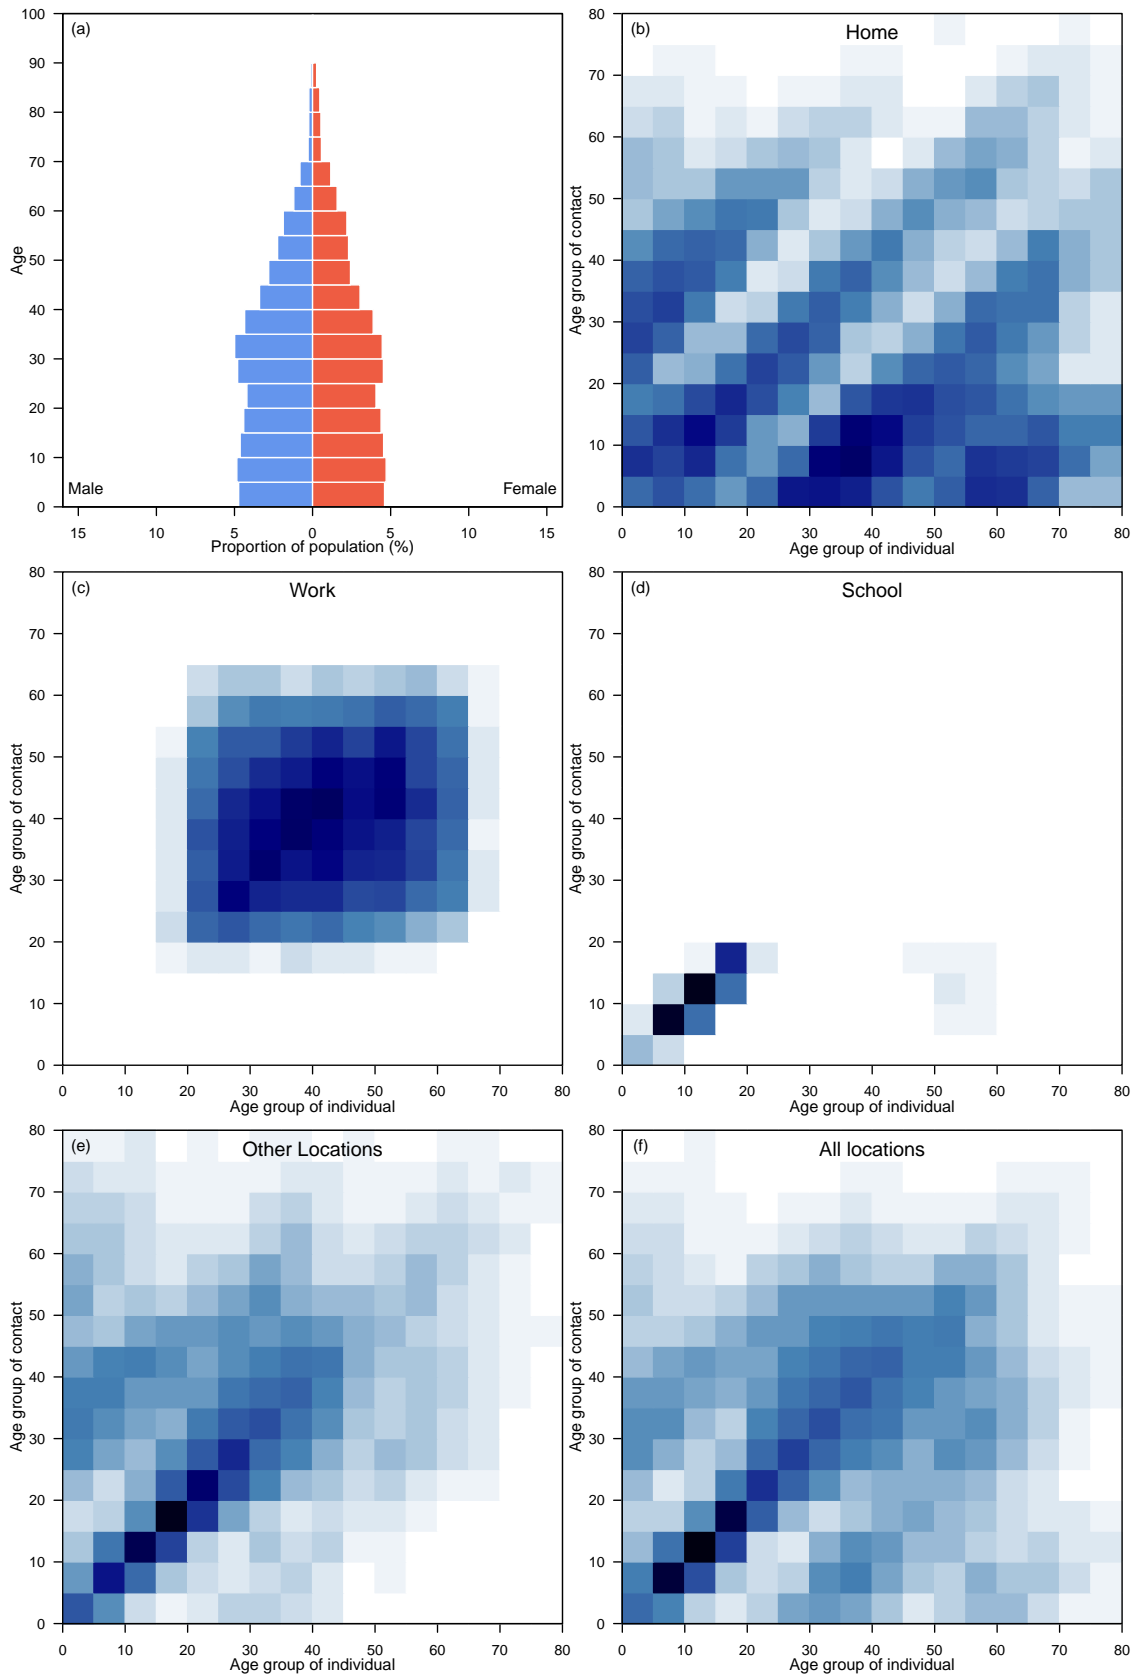

# Cambodia

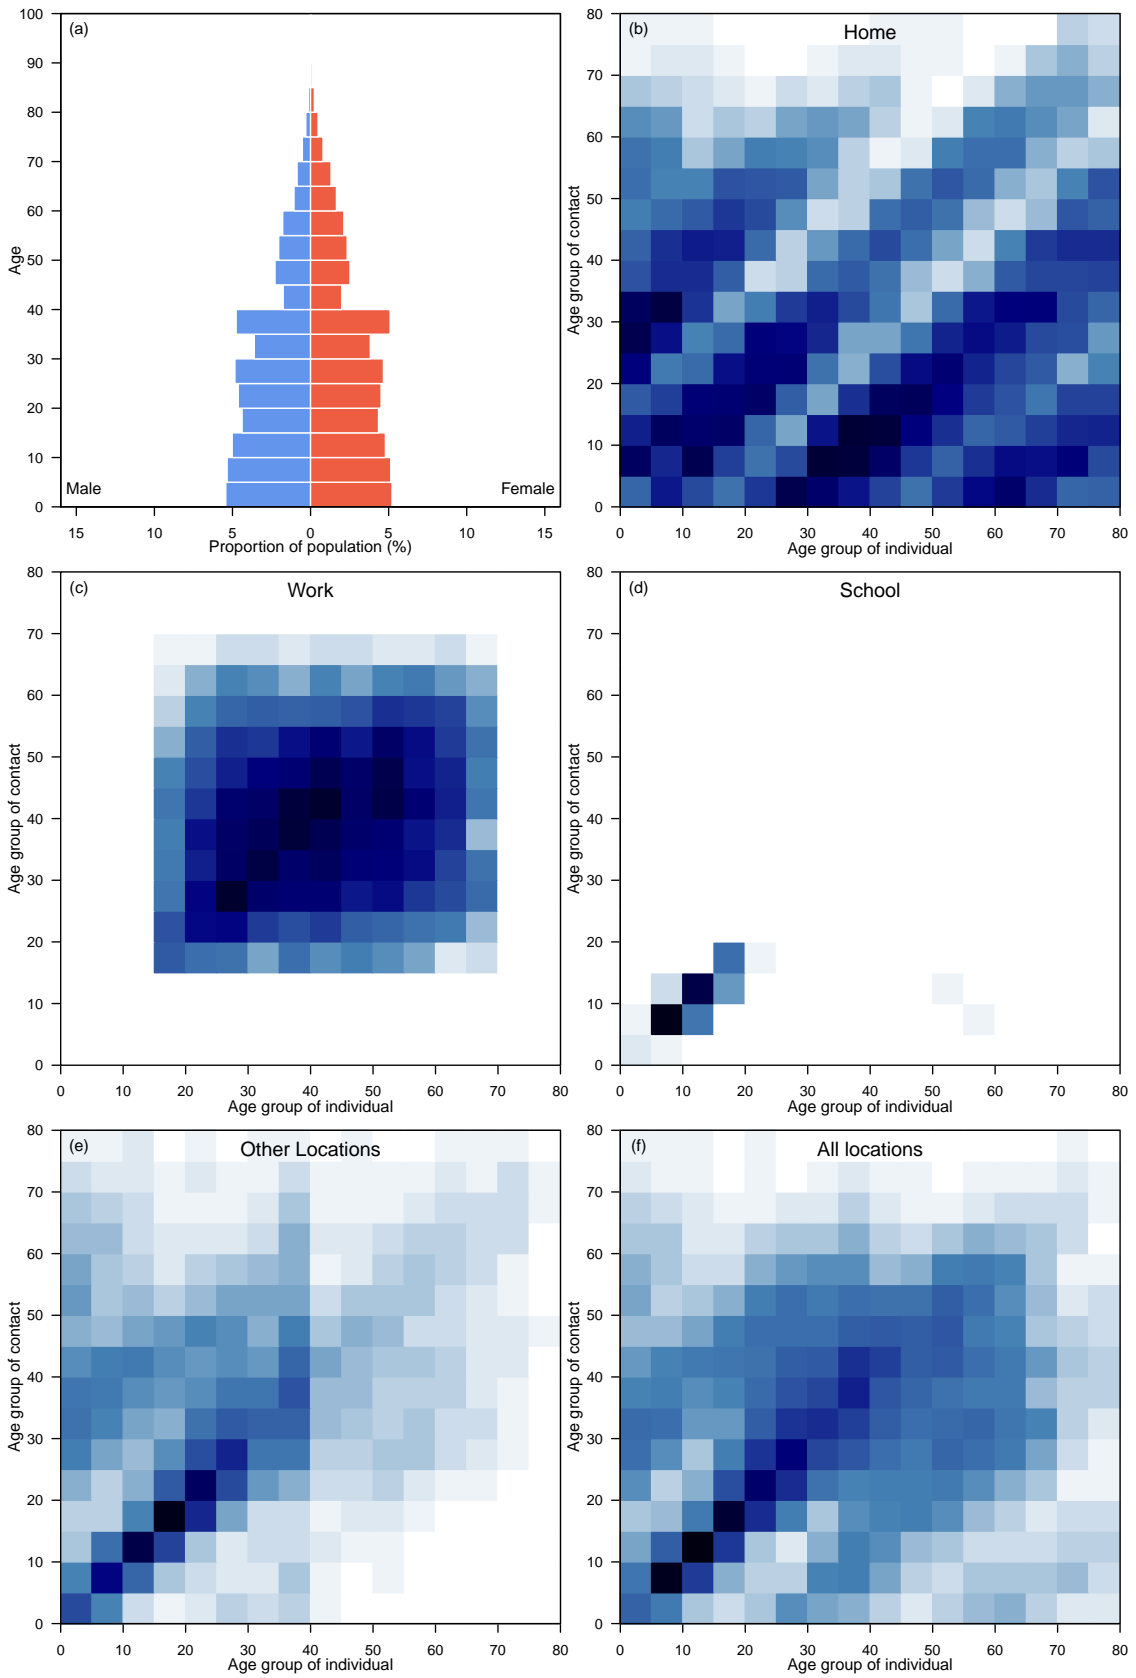

# Cameroon

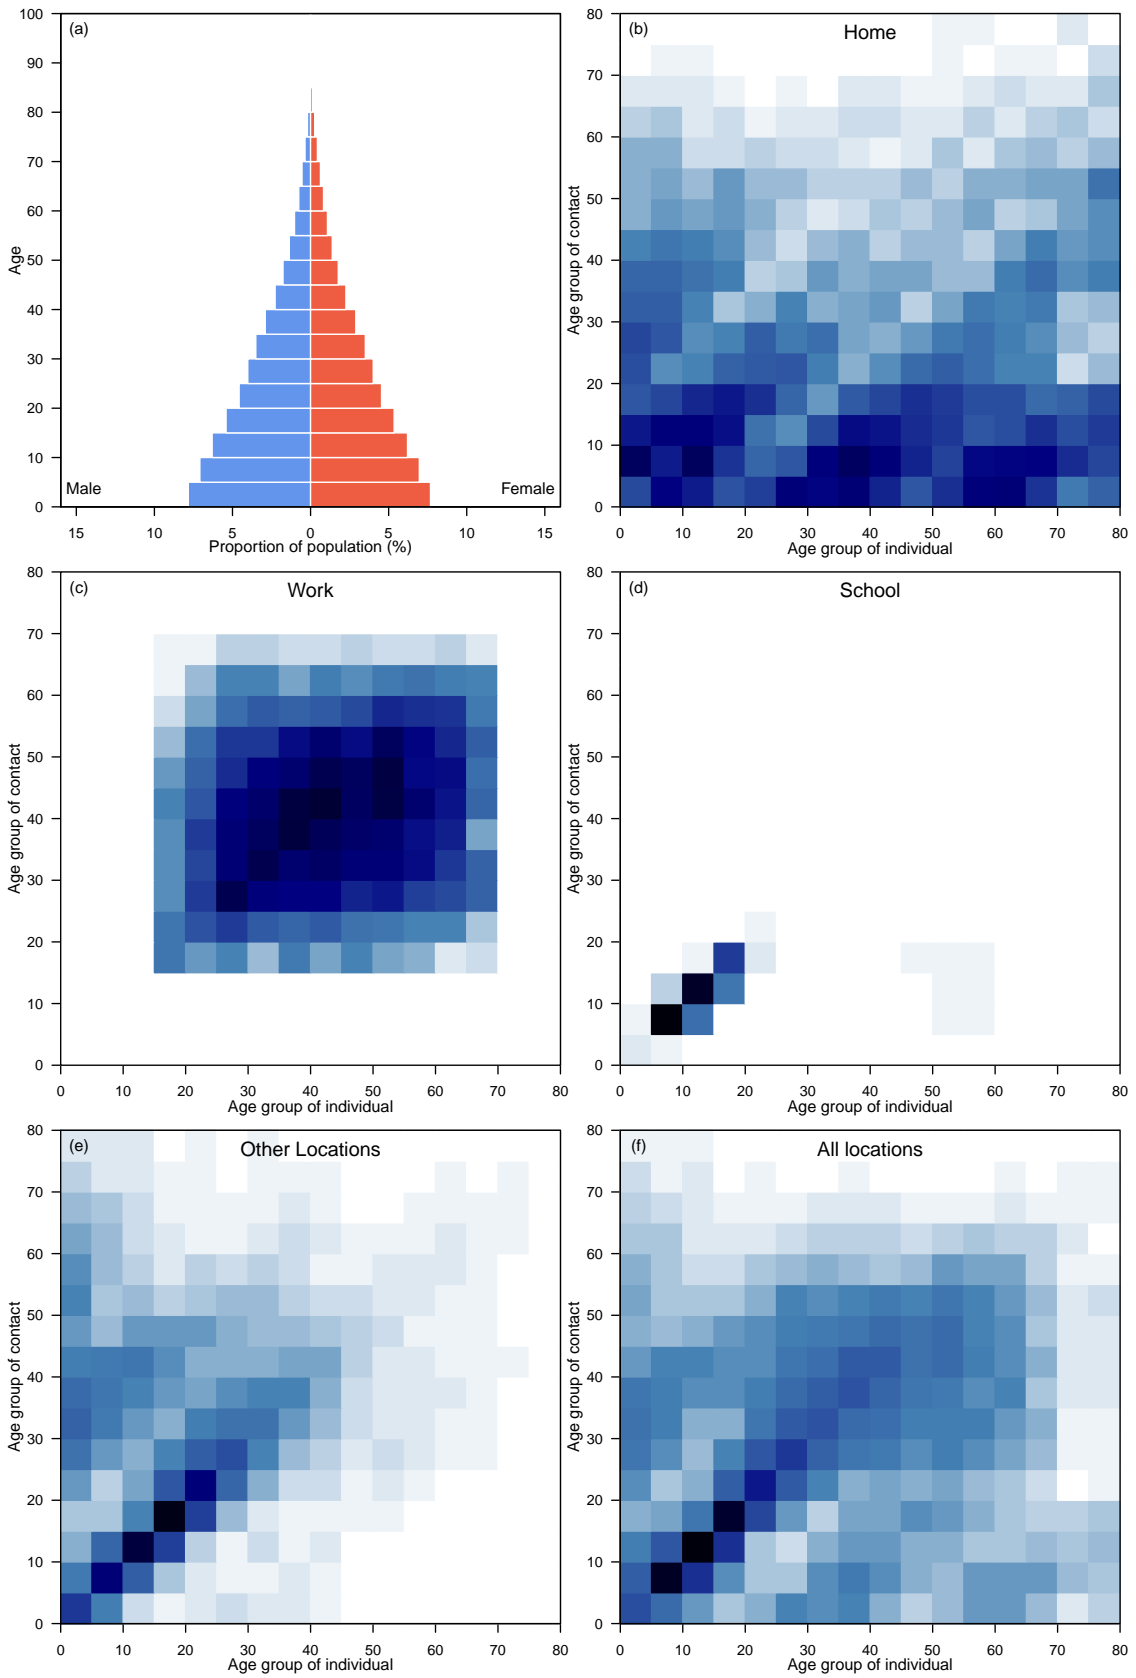

# Canada

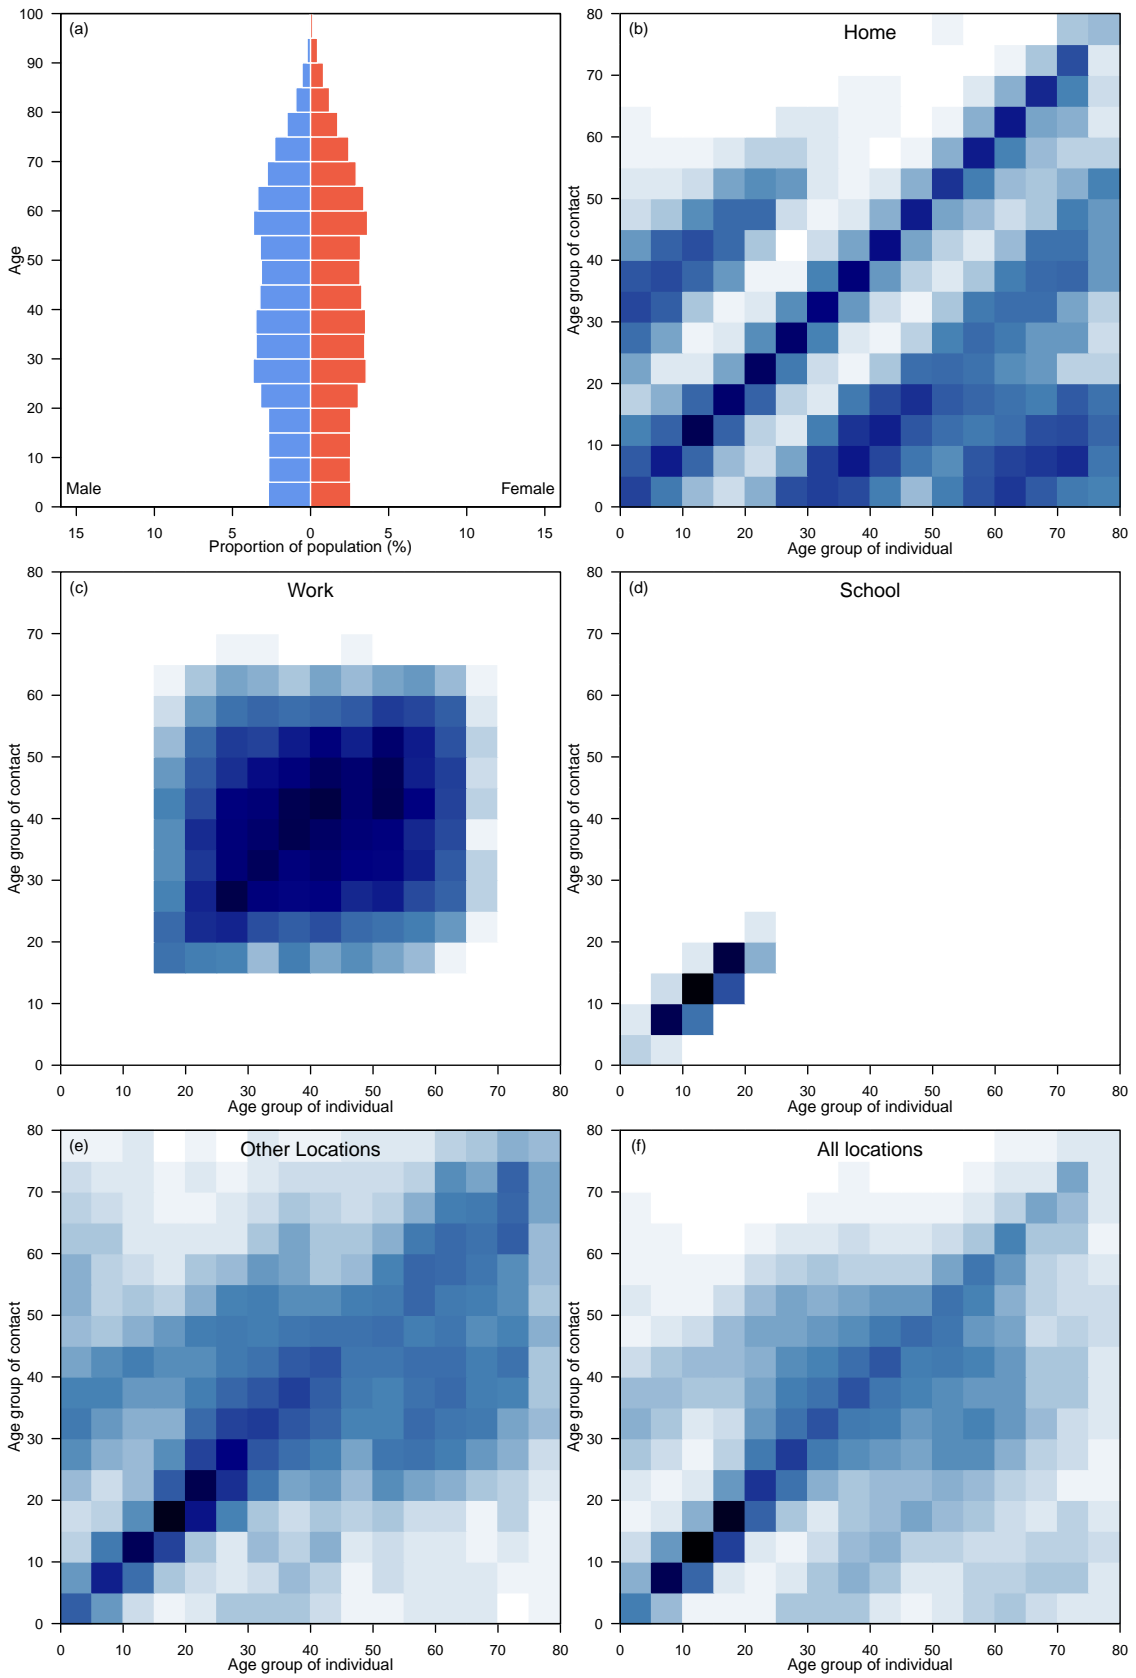

# Central African Republic

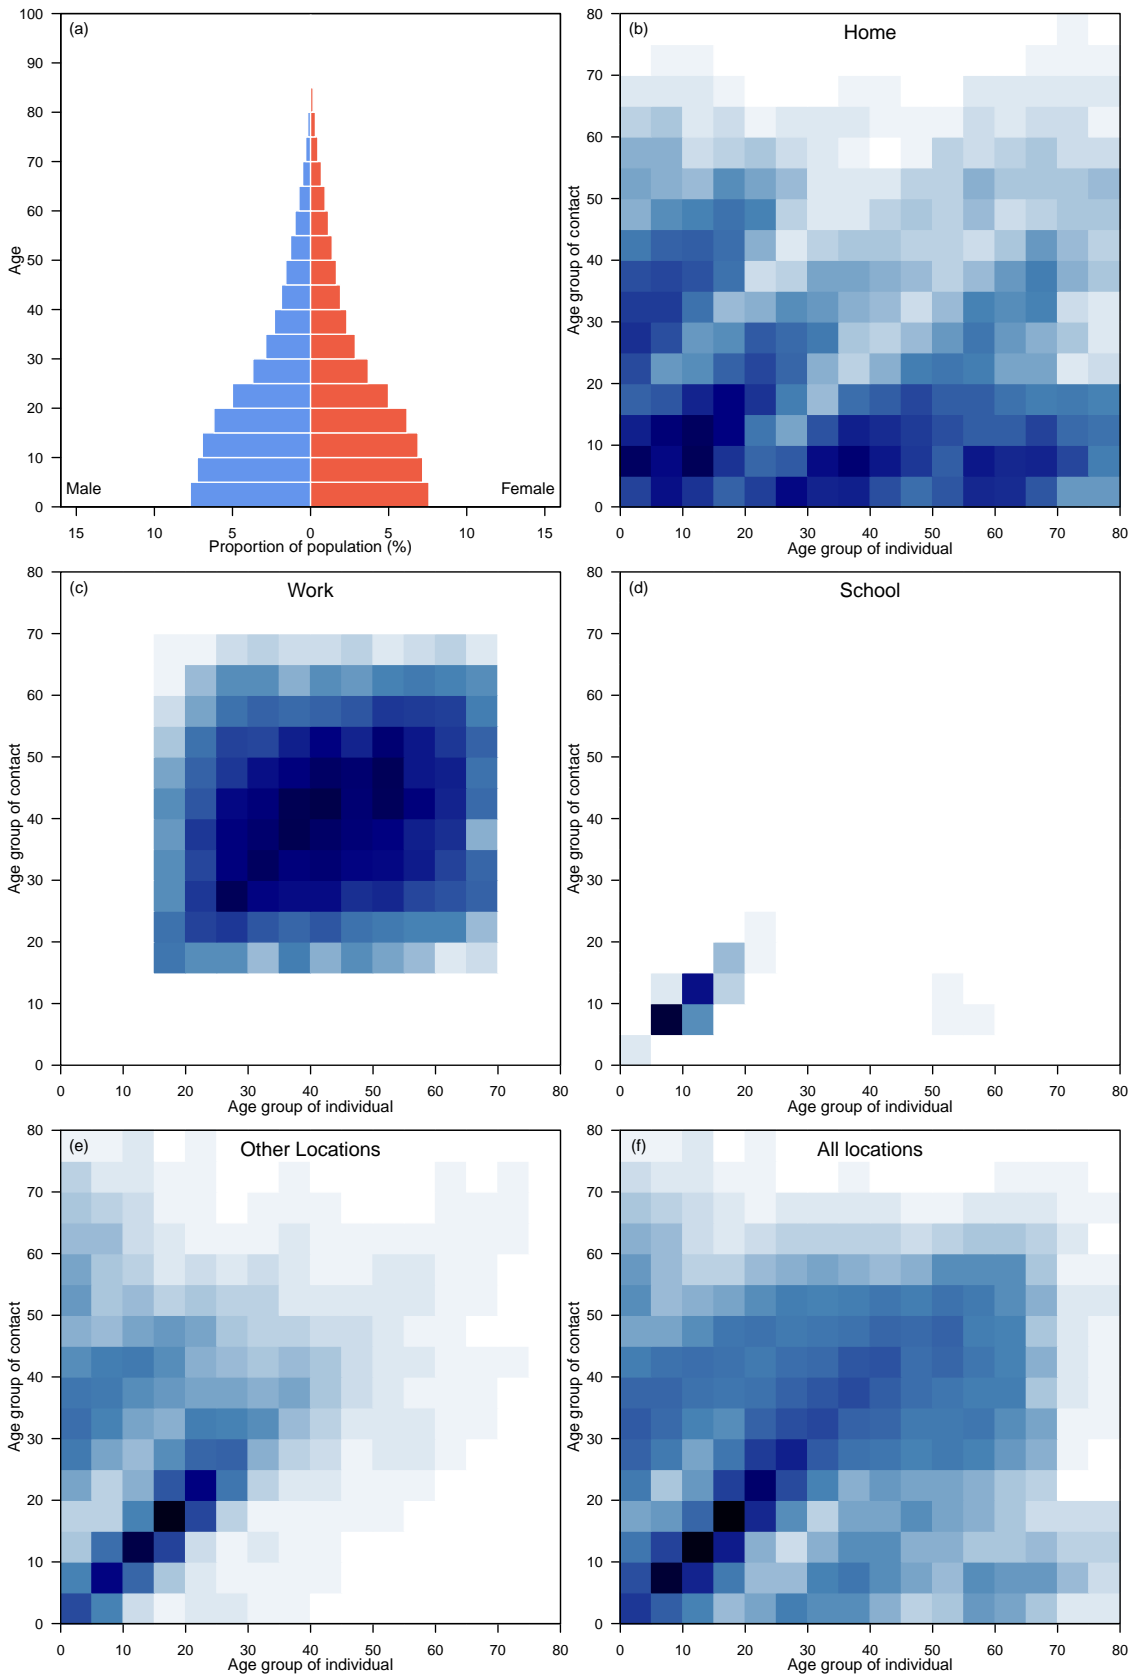

# Chad

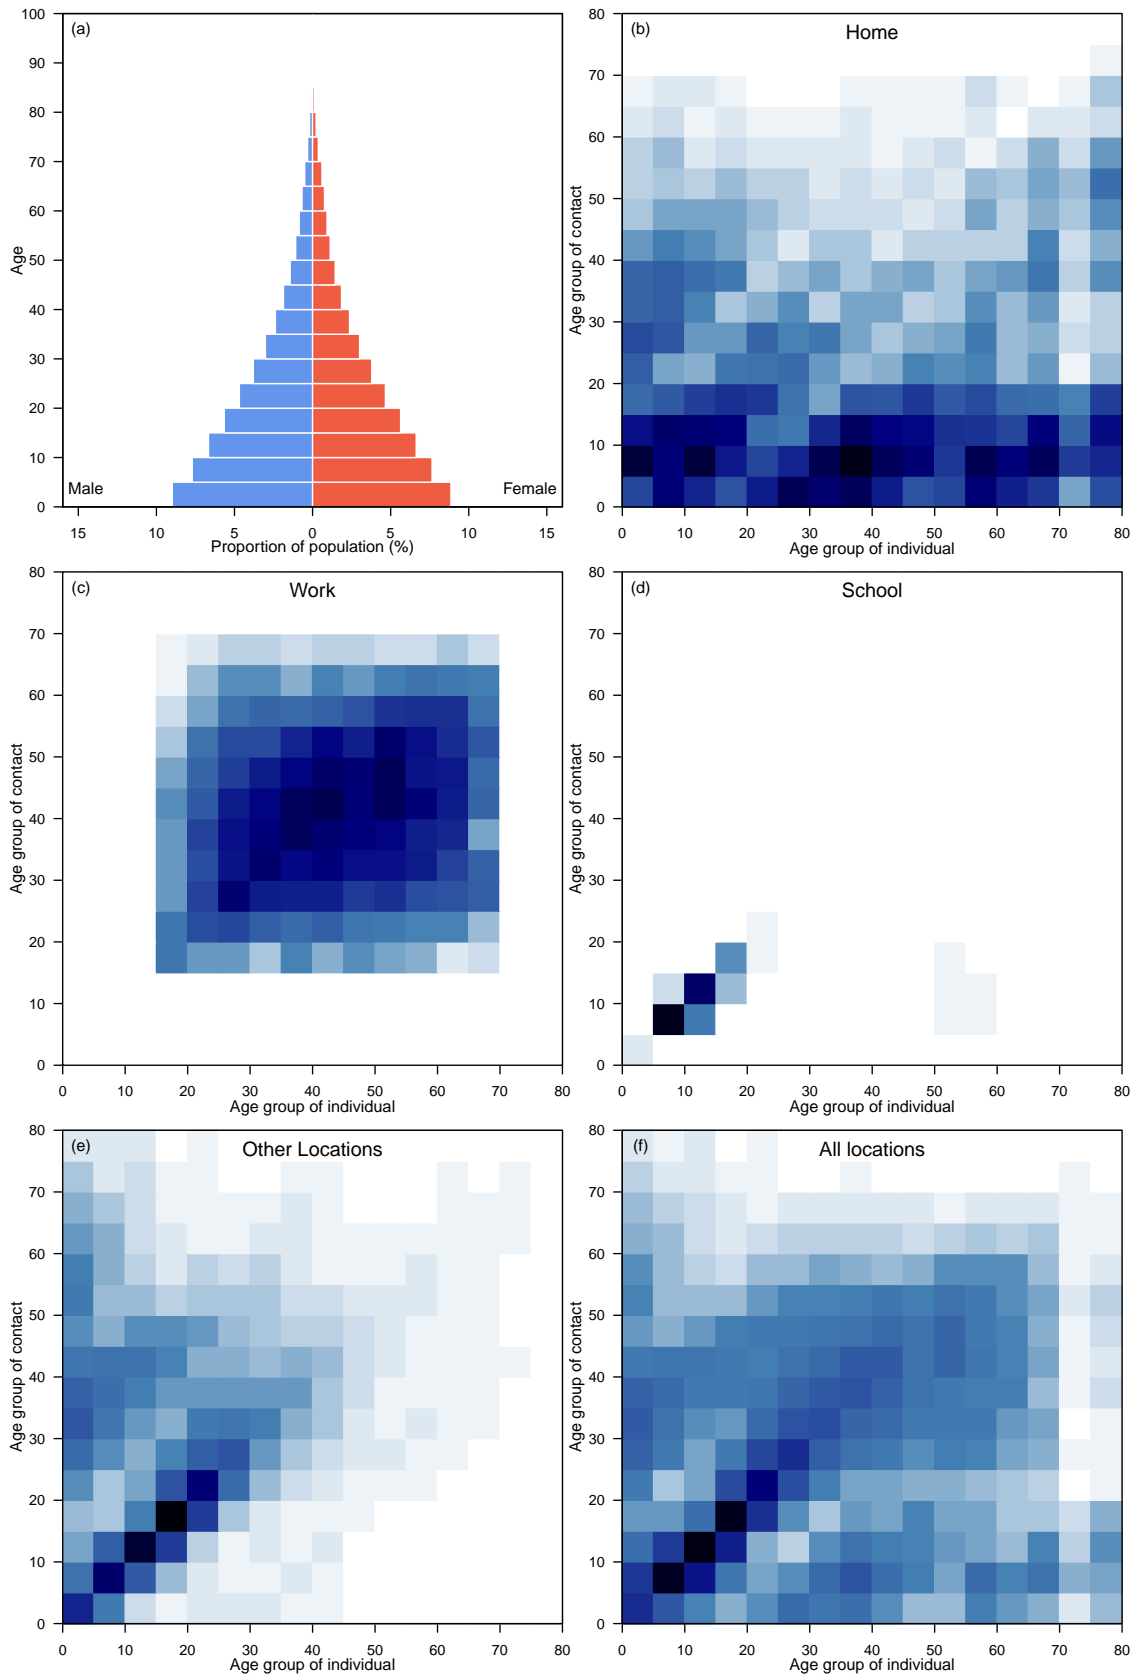

# Chile

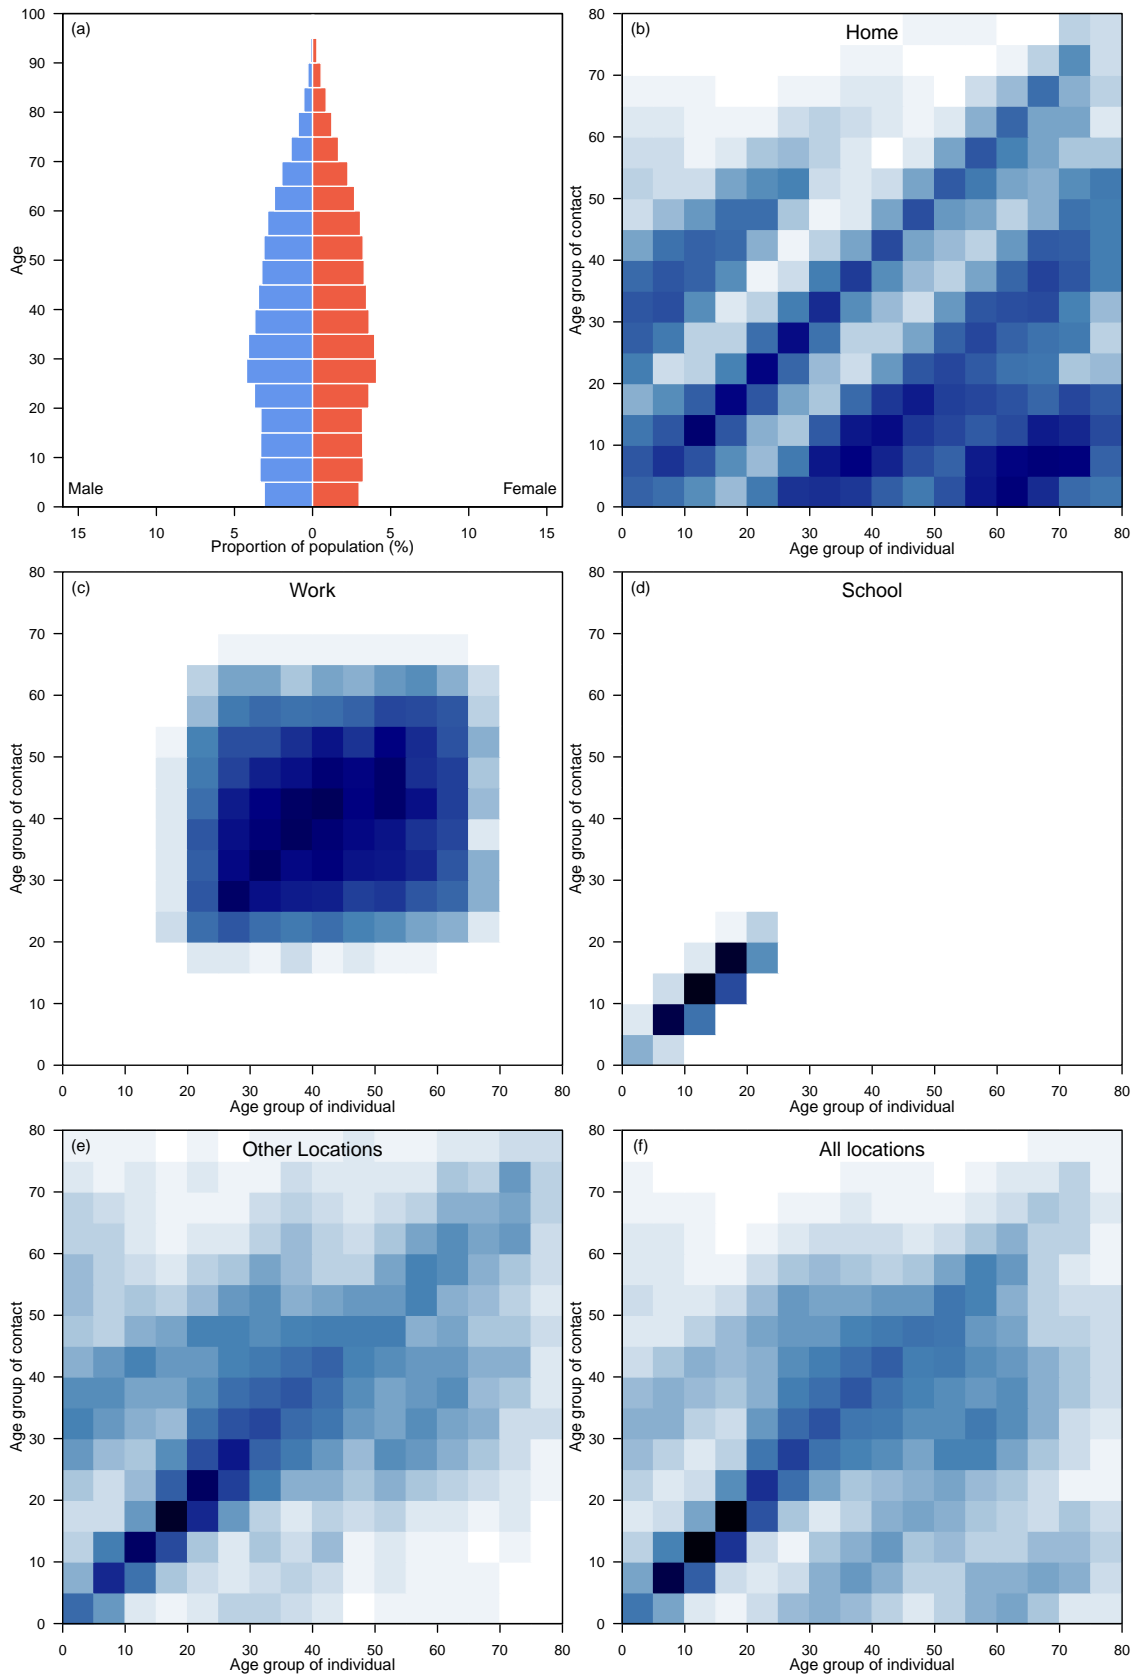

# China

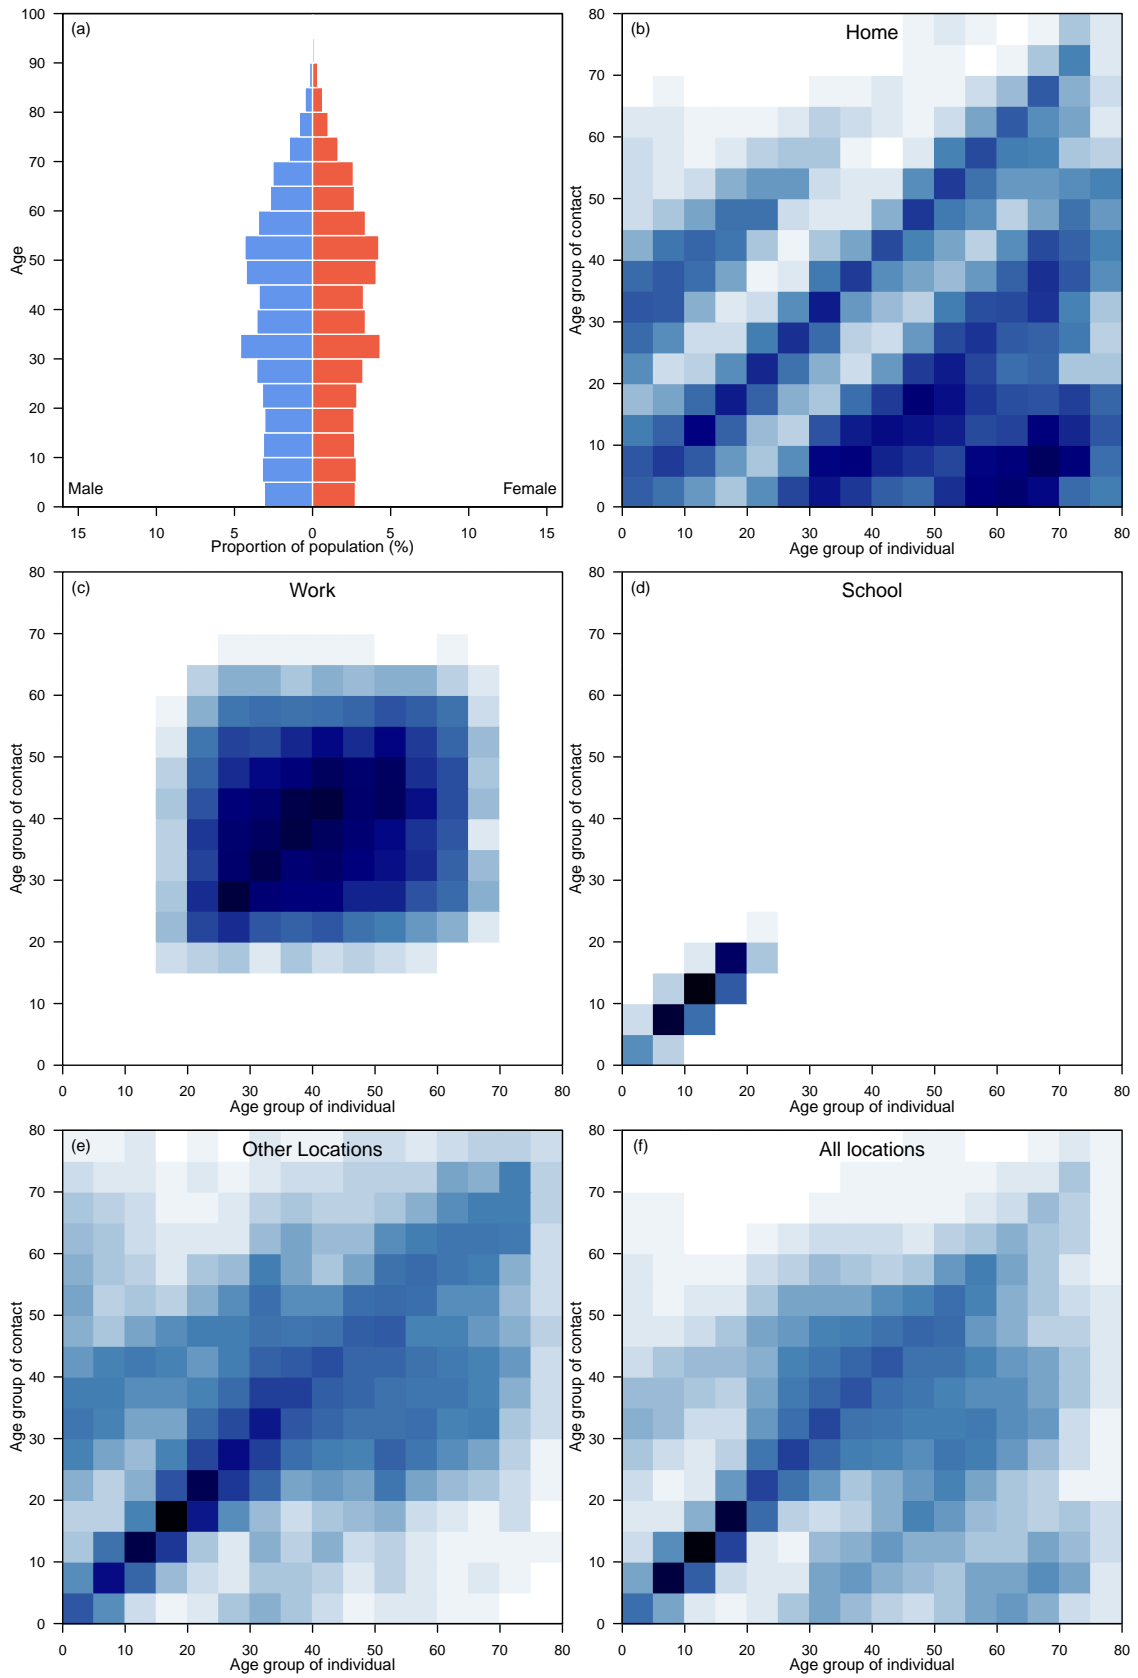



# China, Hong Kong SAR

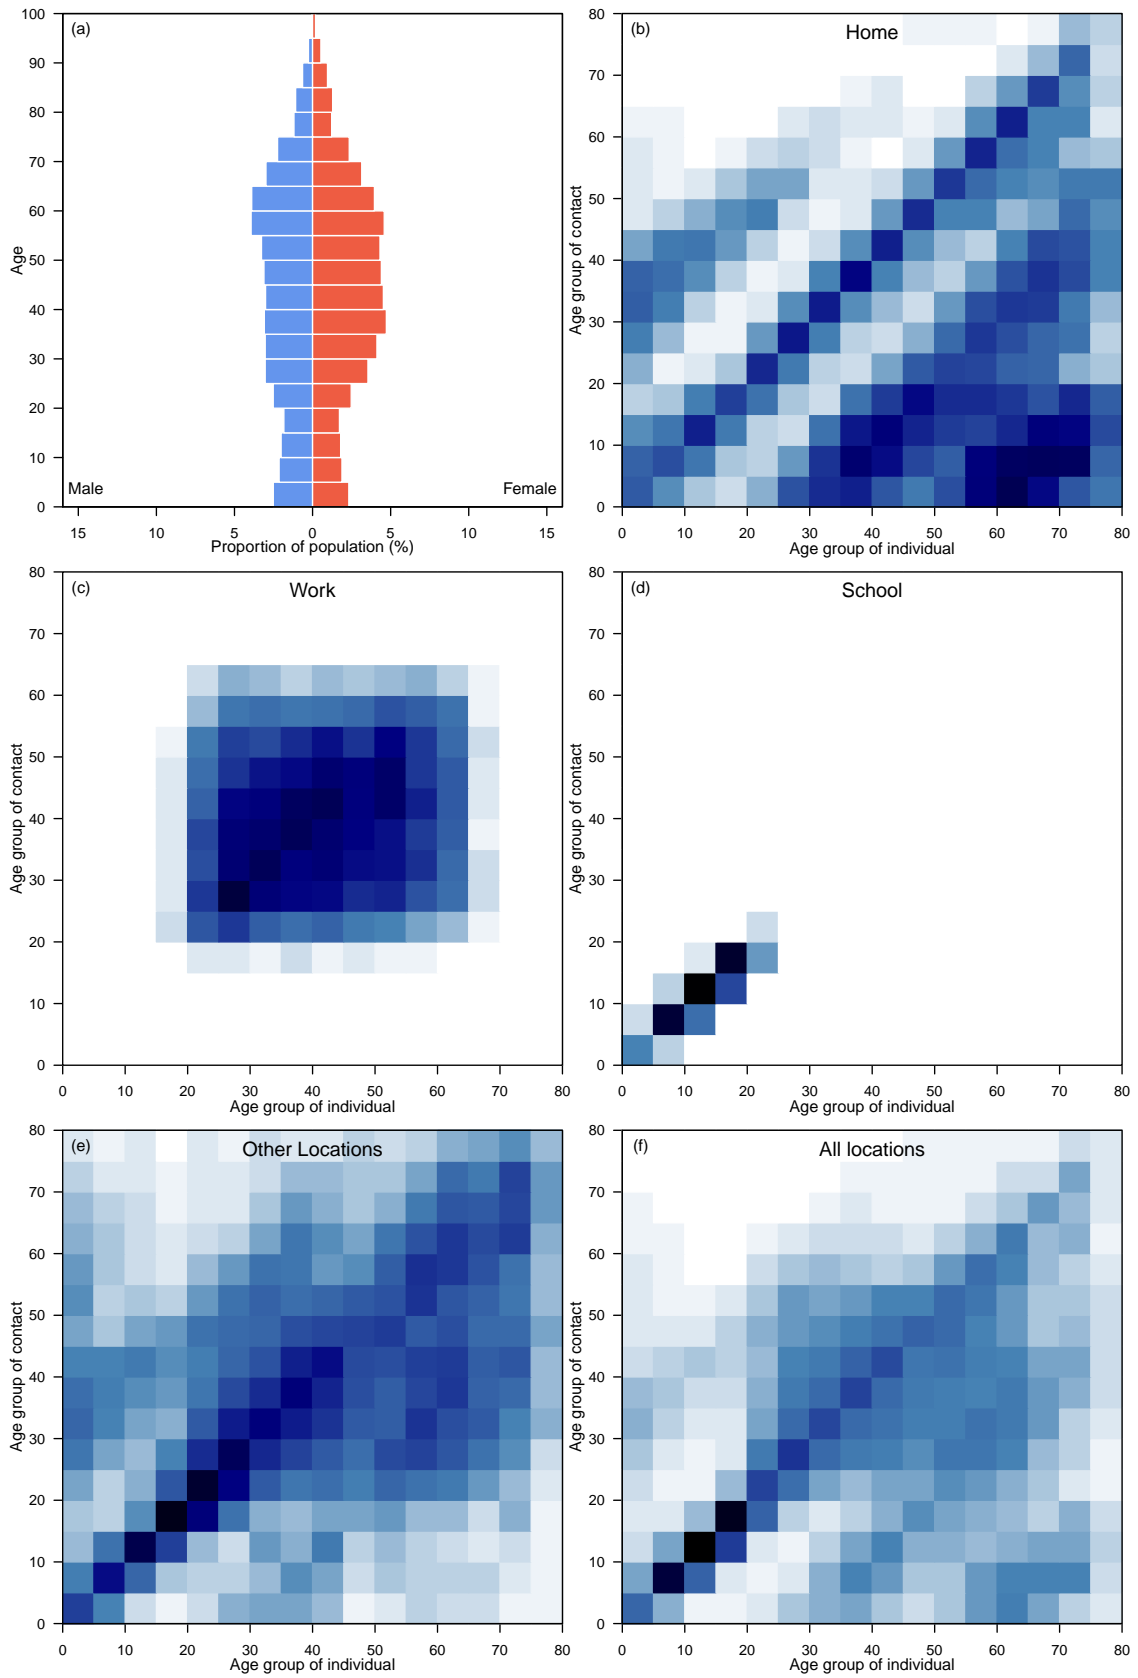

# China, Macao SAR

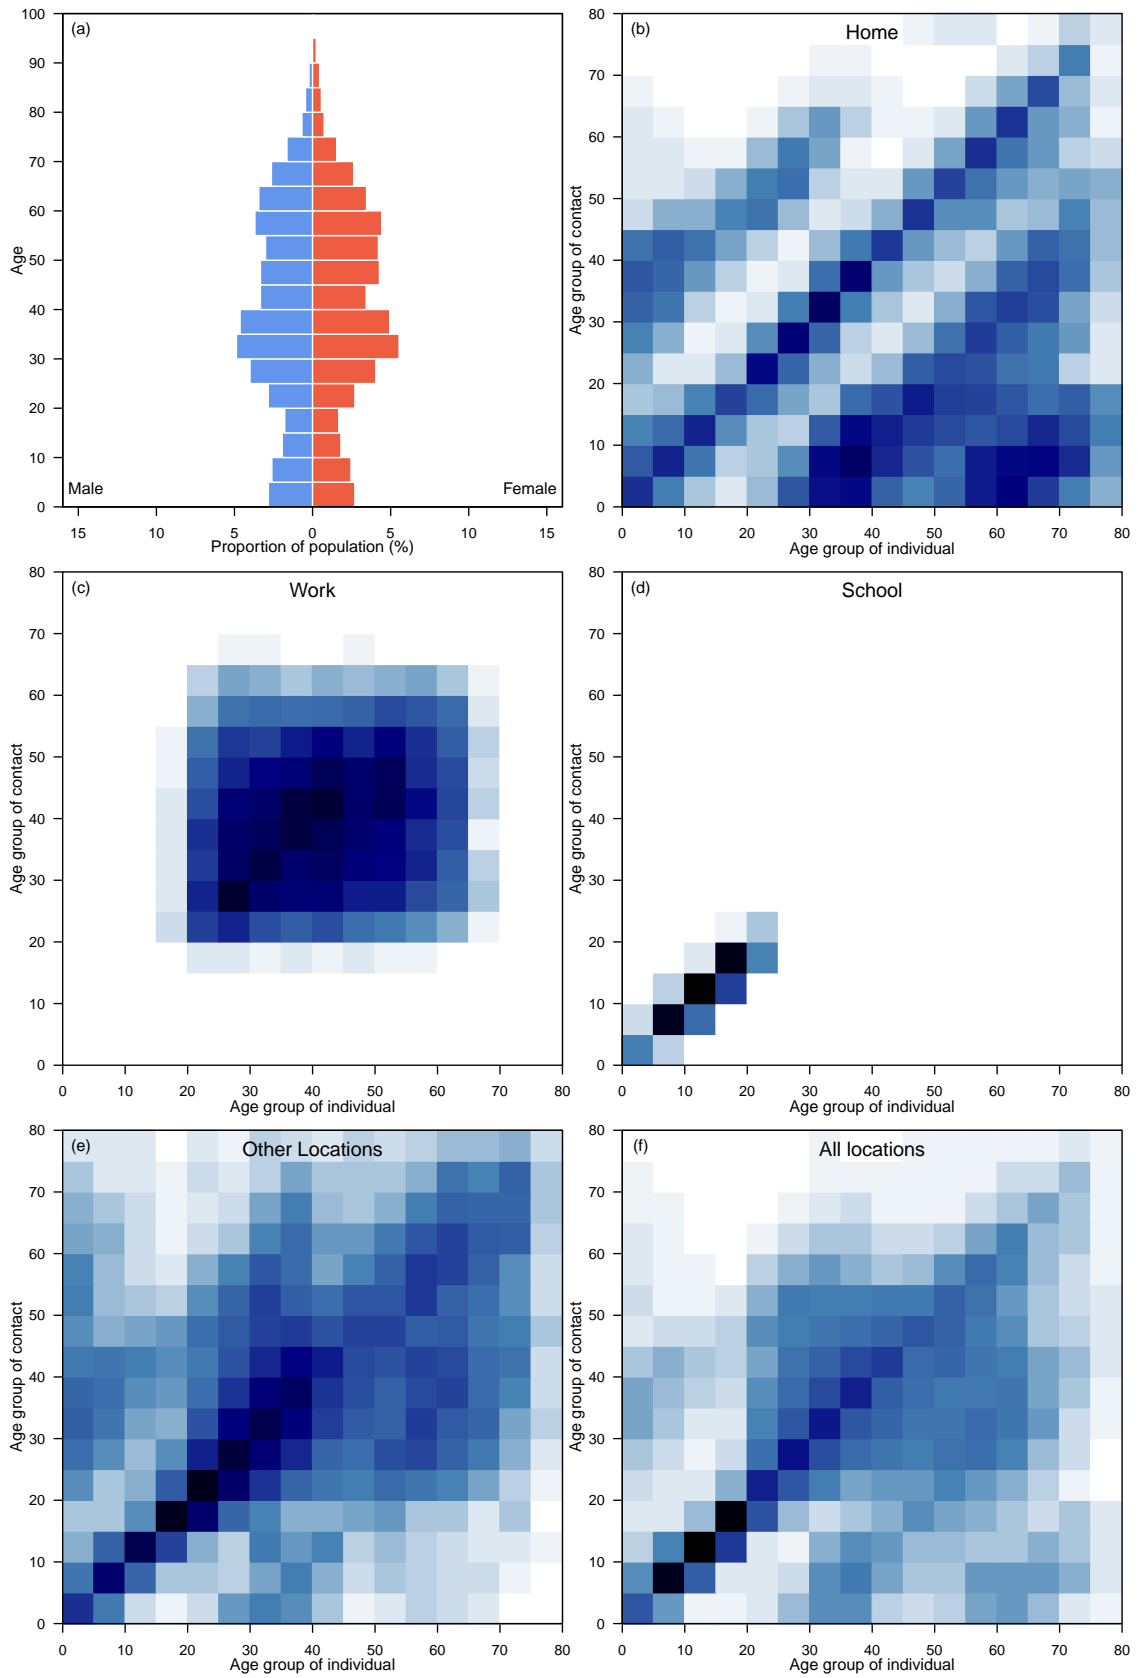

# Colombia

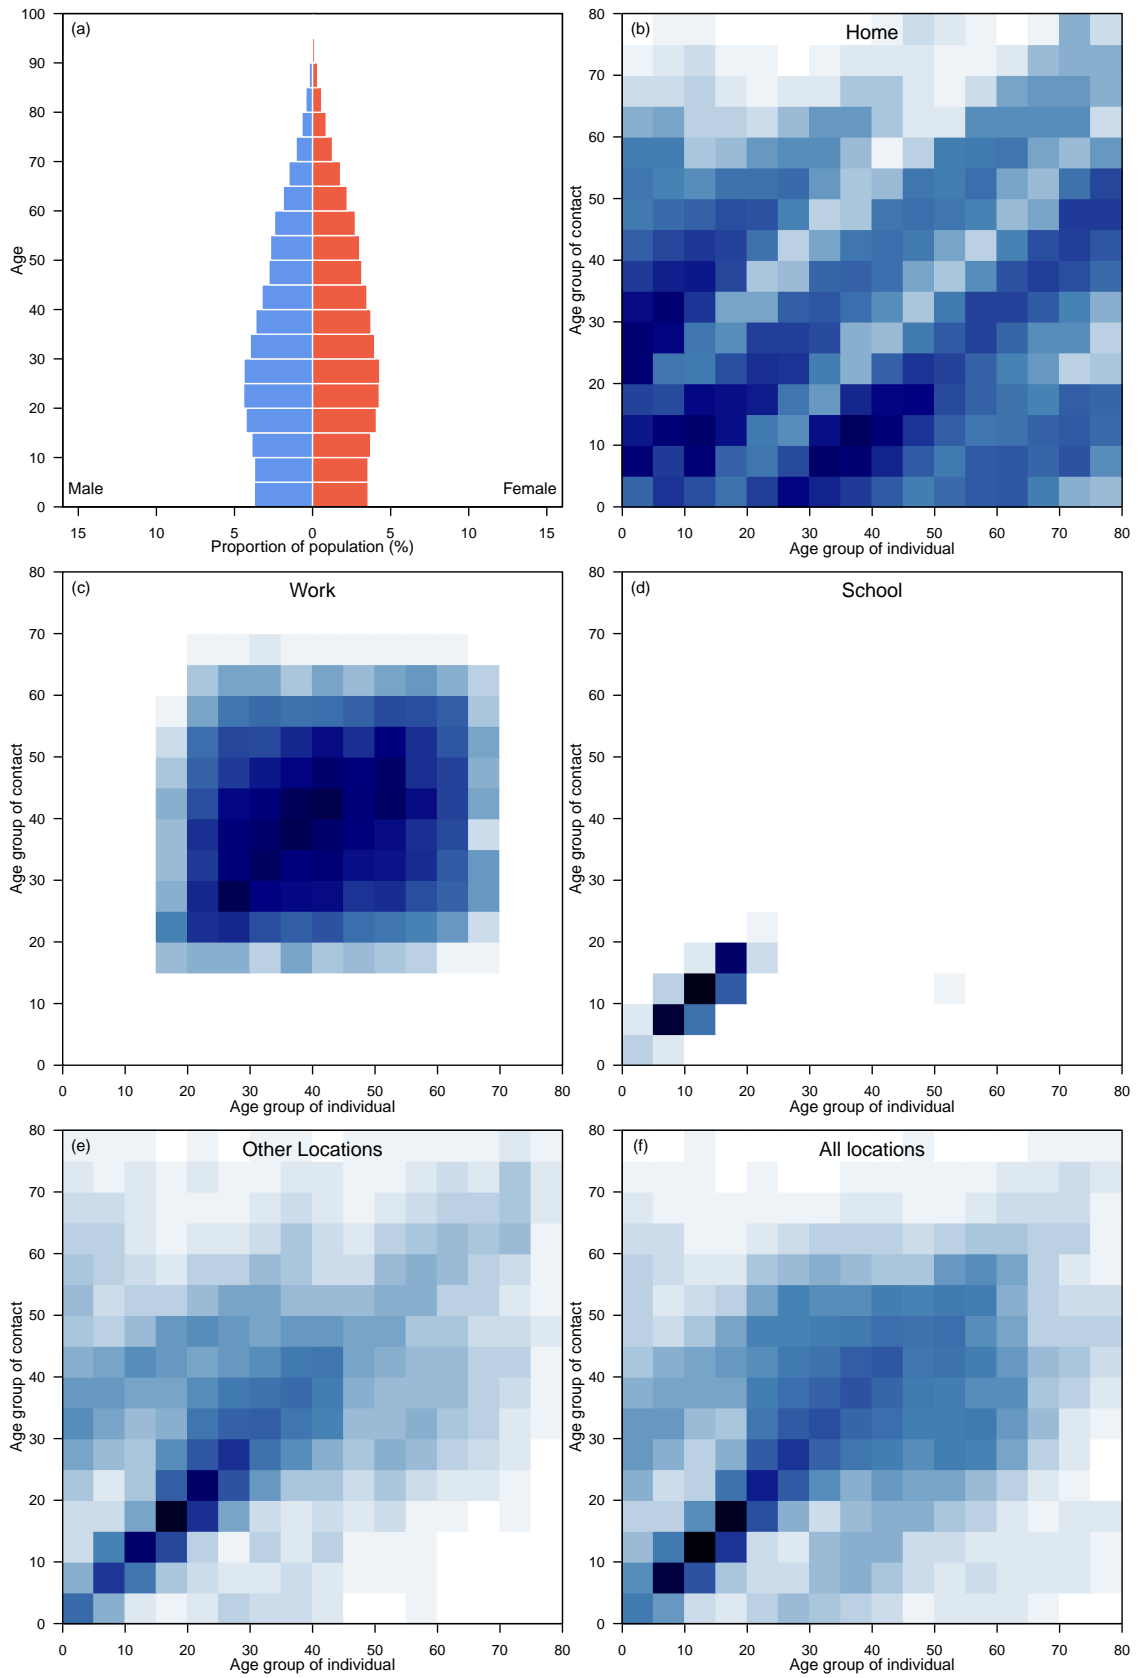

# Comoros

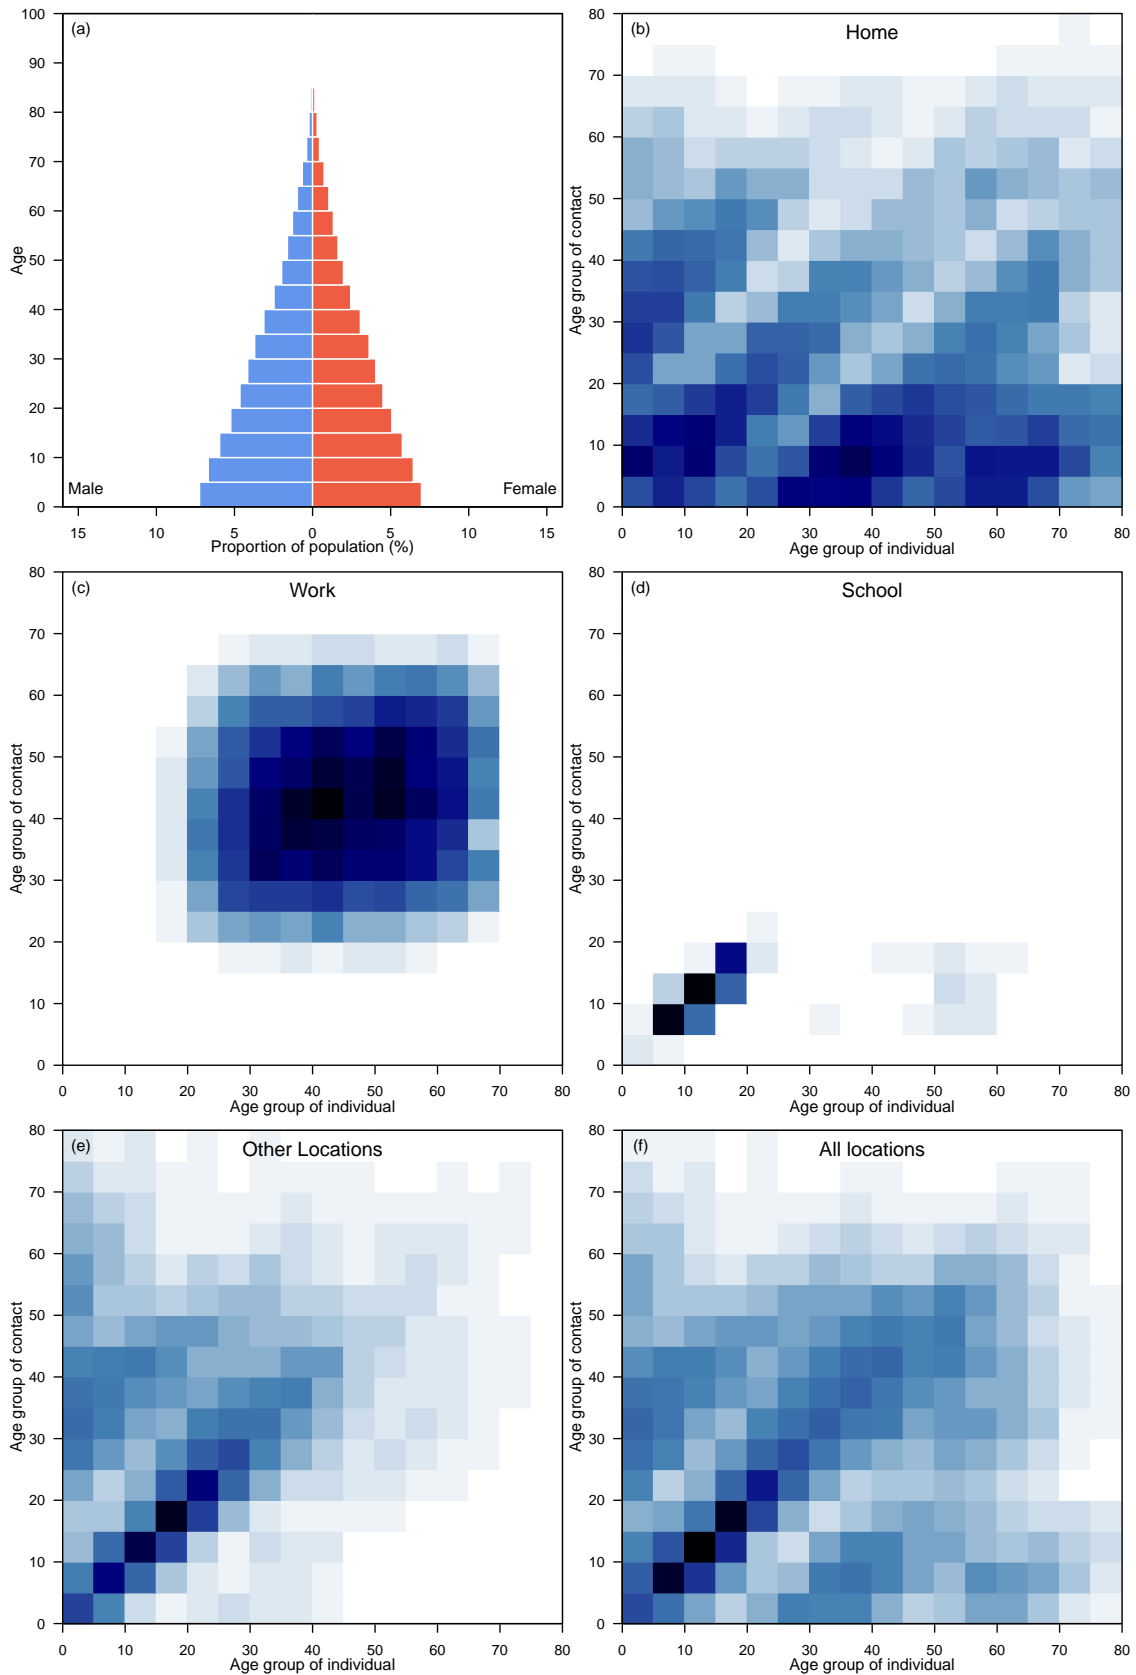

# Congo

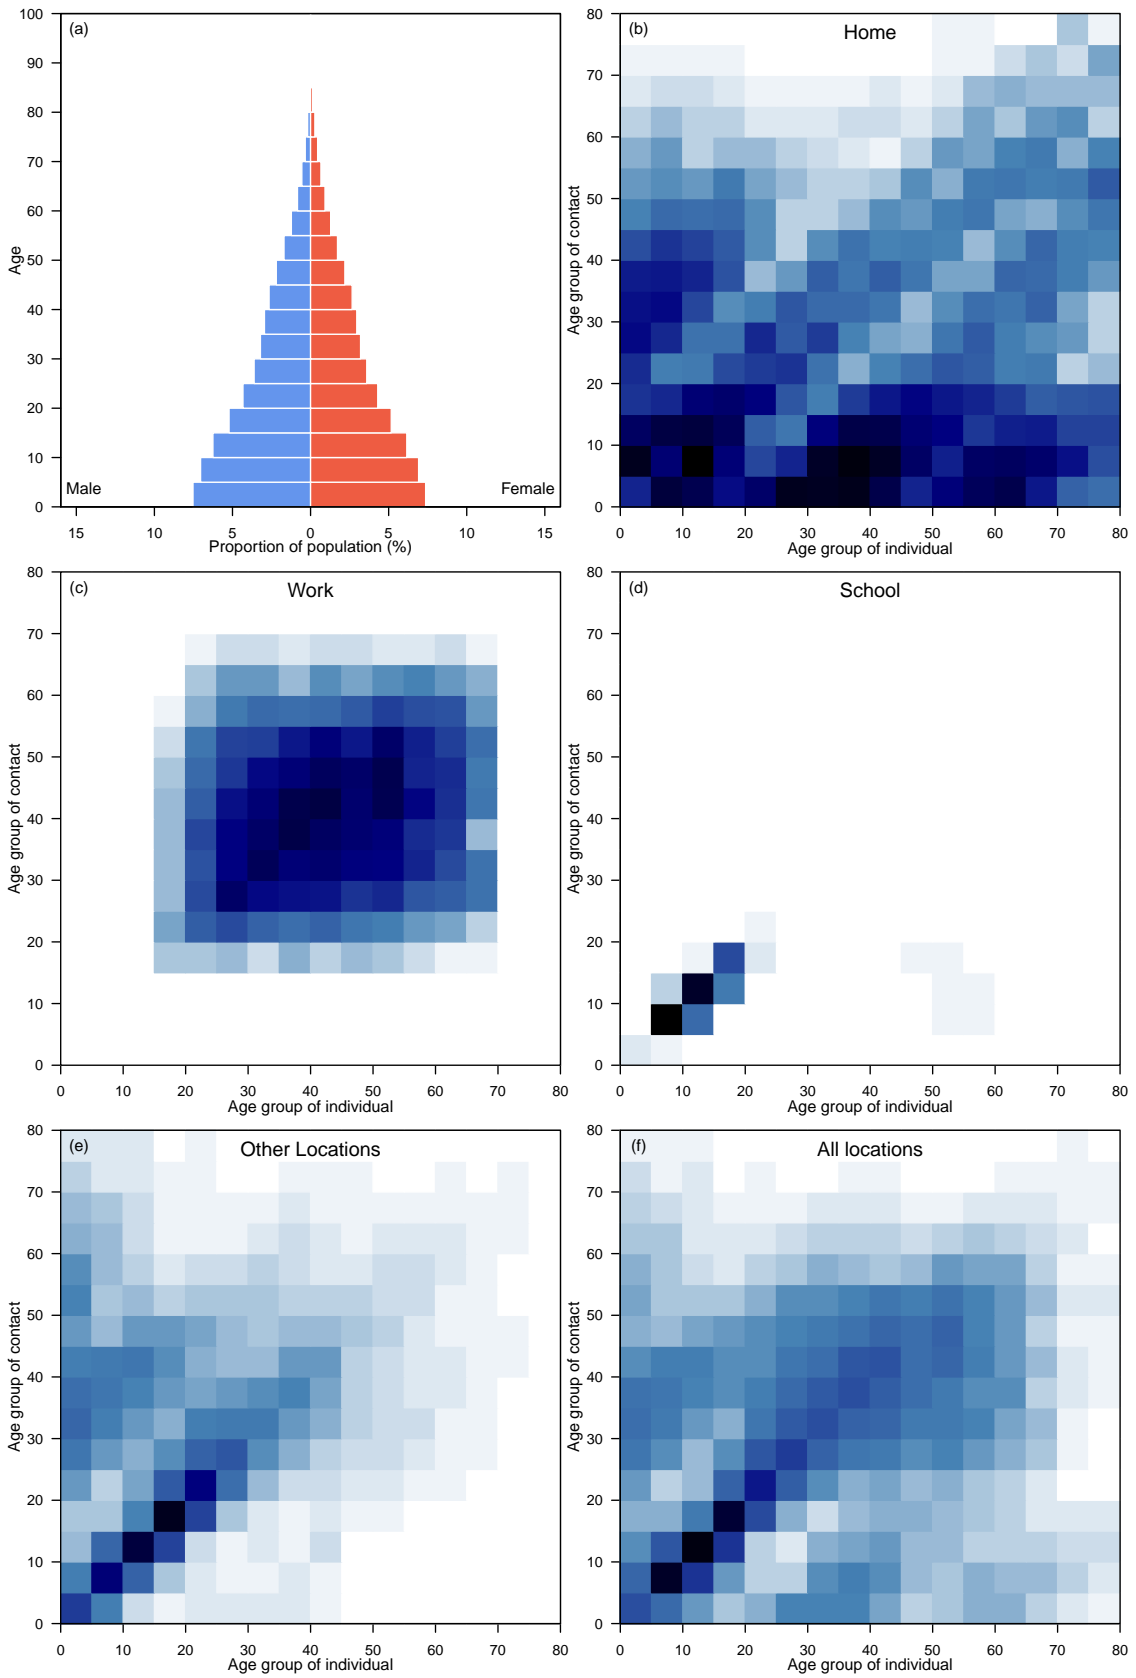

# Costa Rica

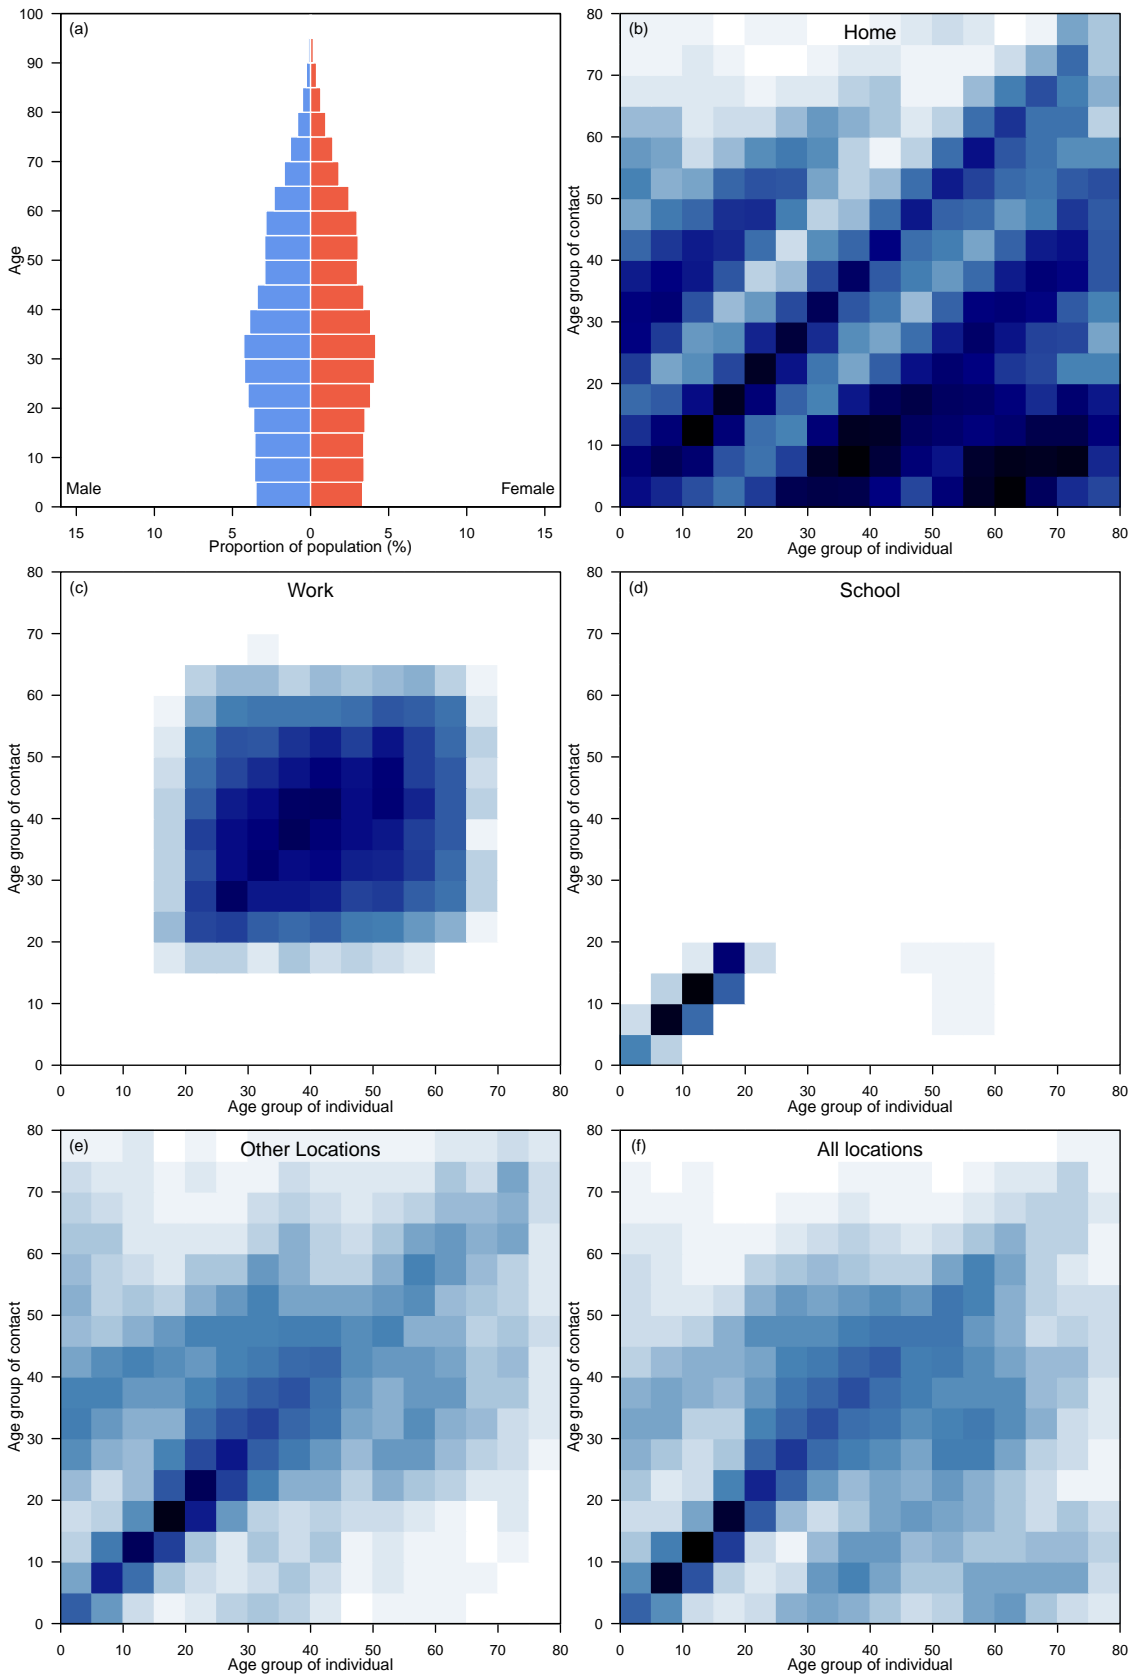

# Côte d'Ivoire

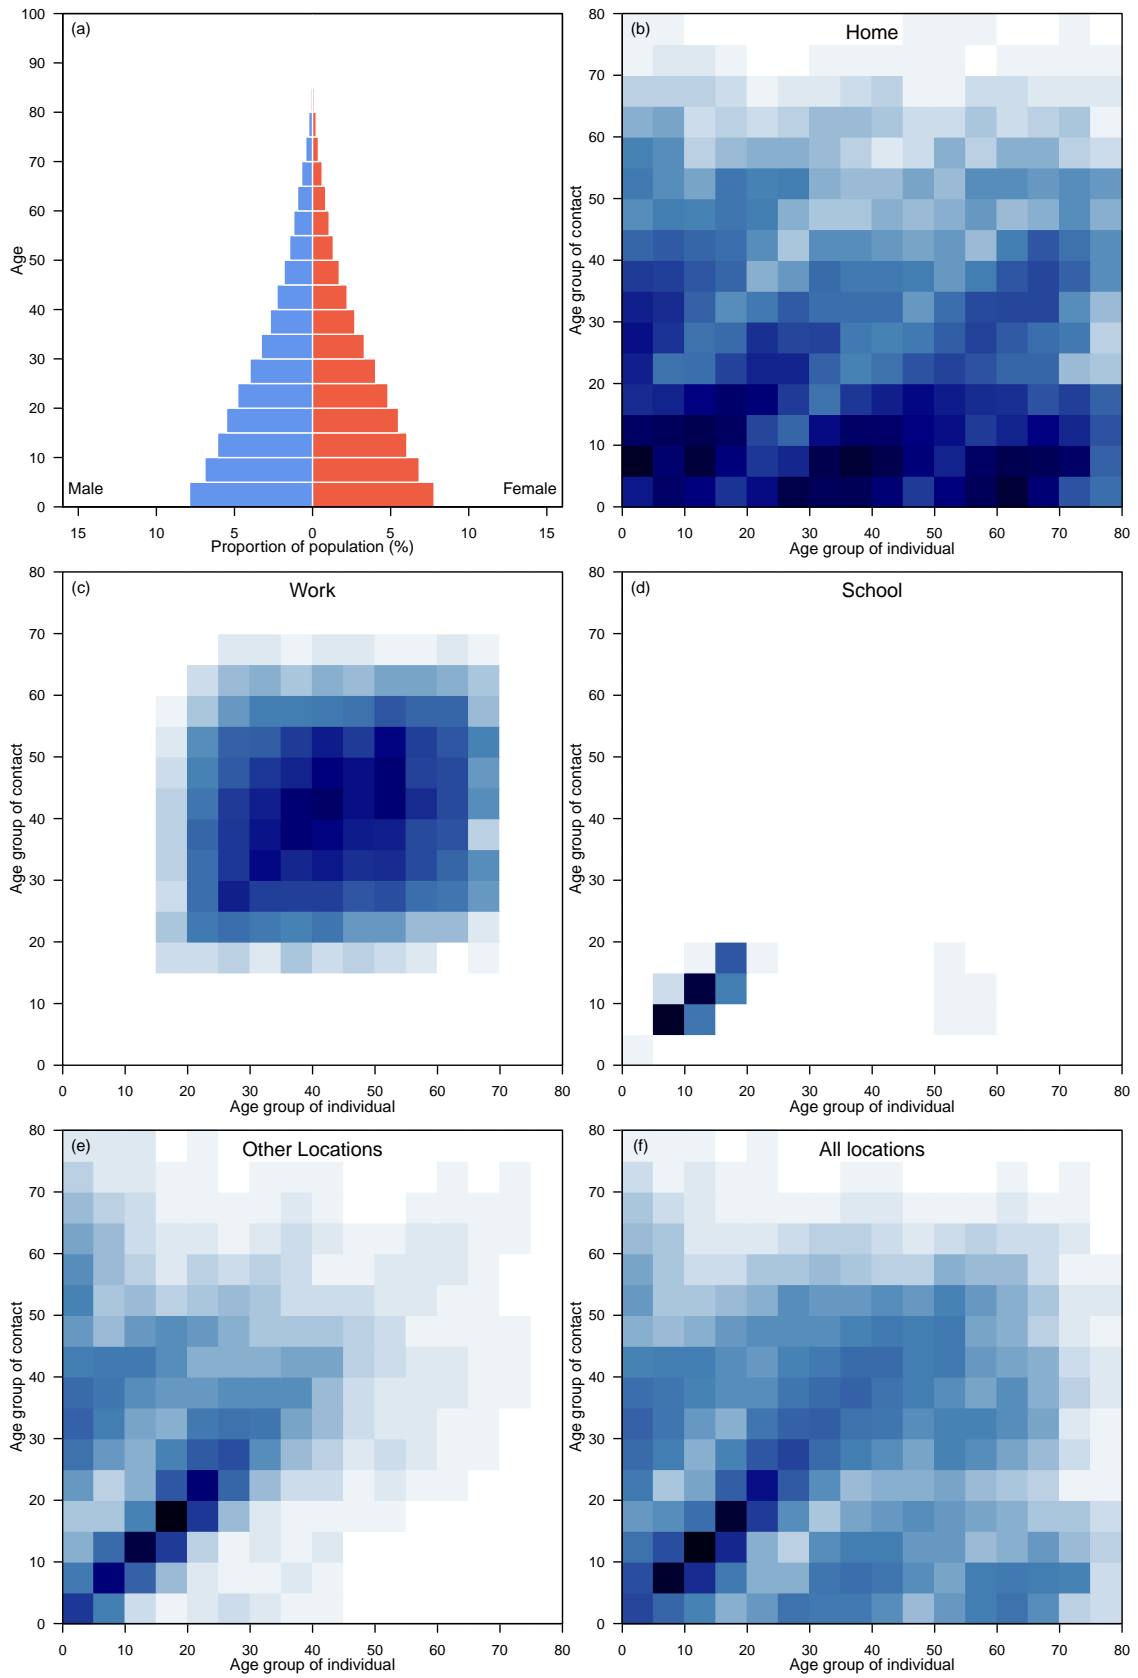

# Croatia

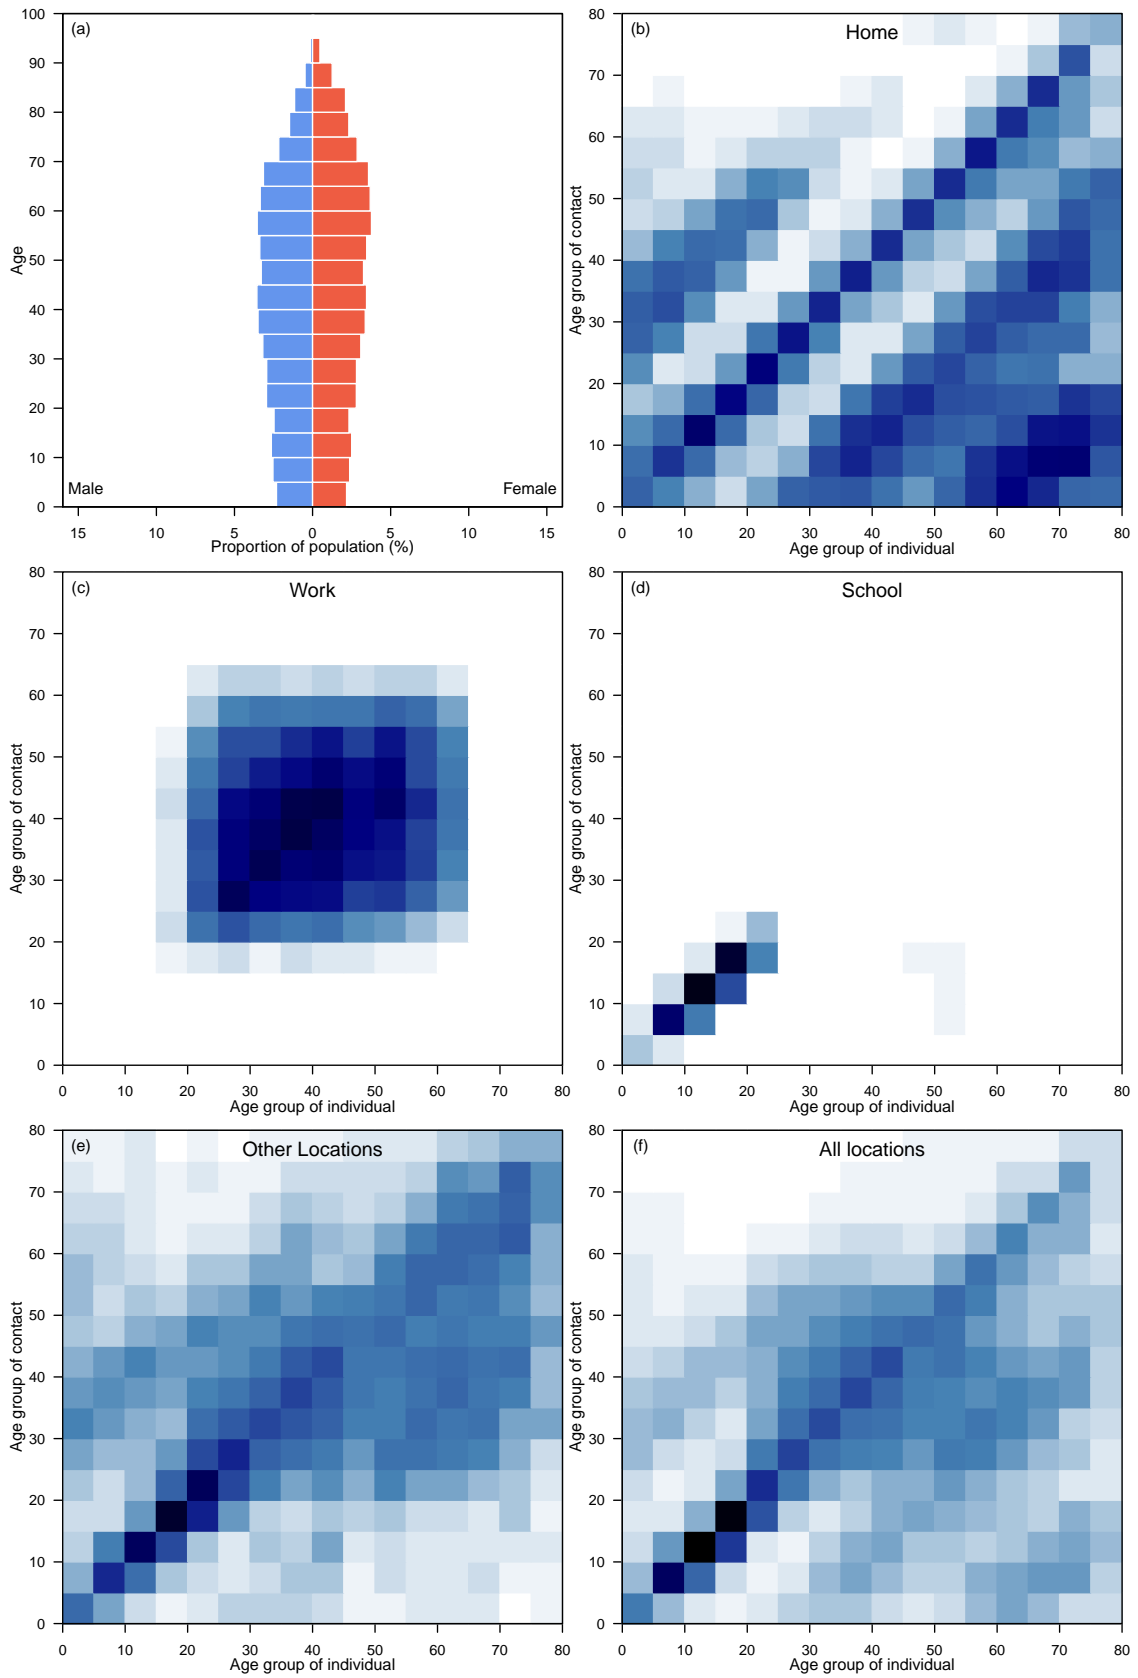



# Cuba

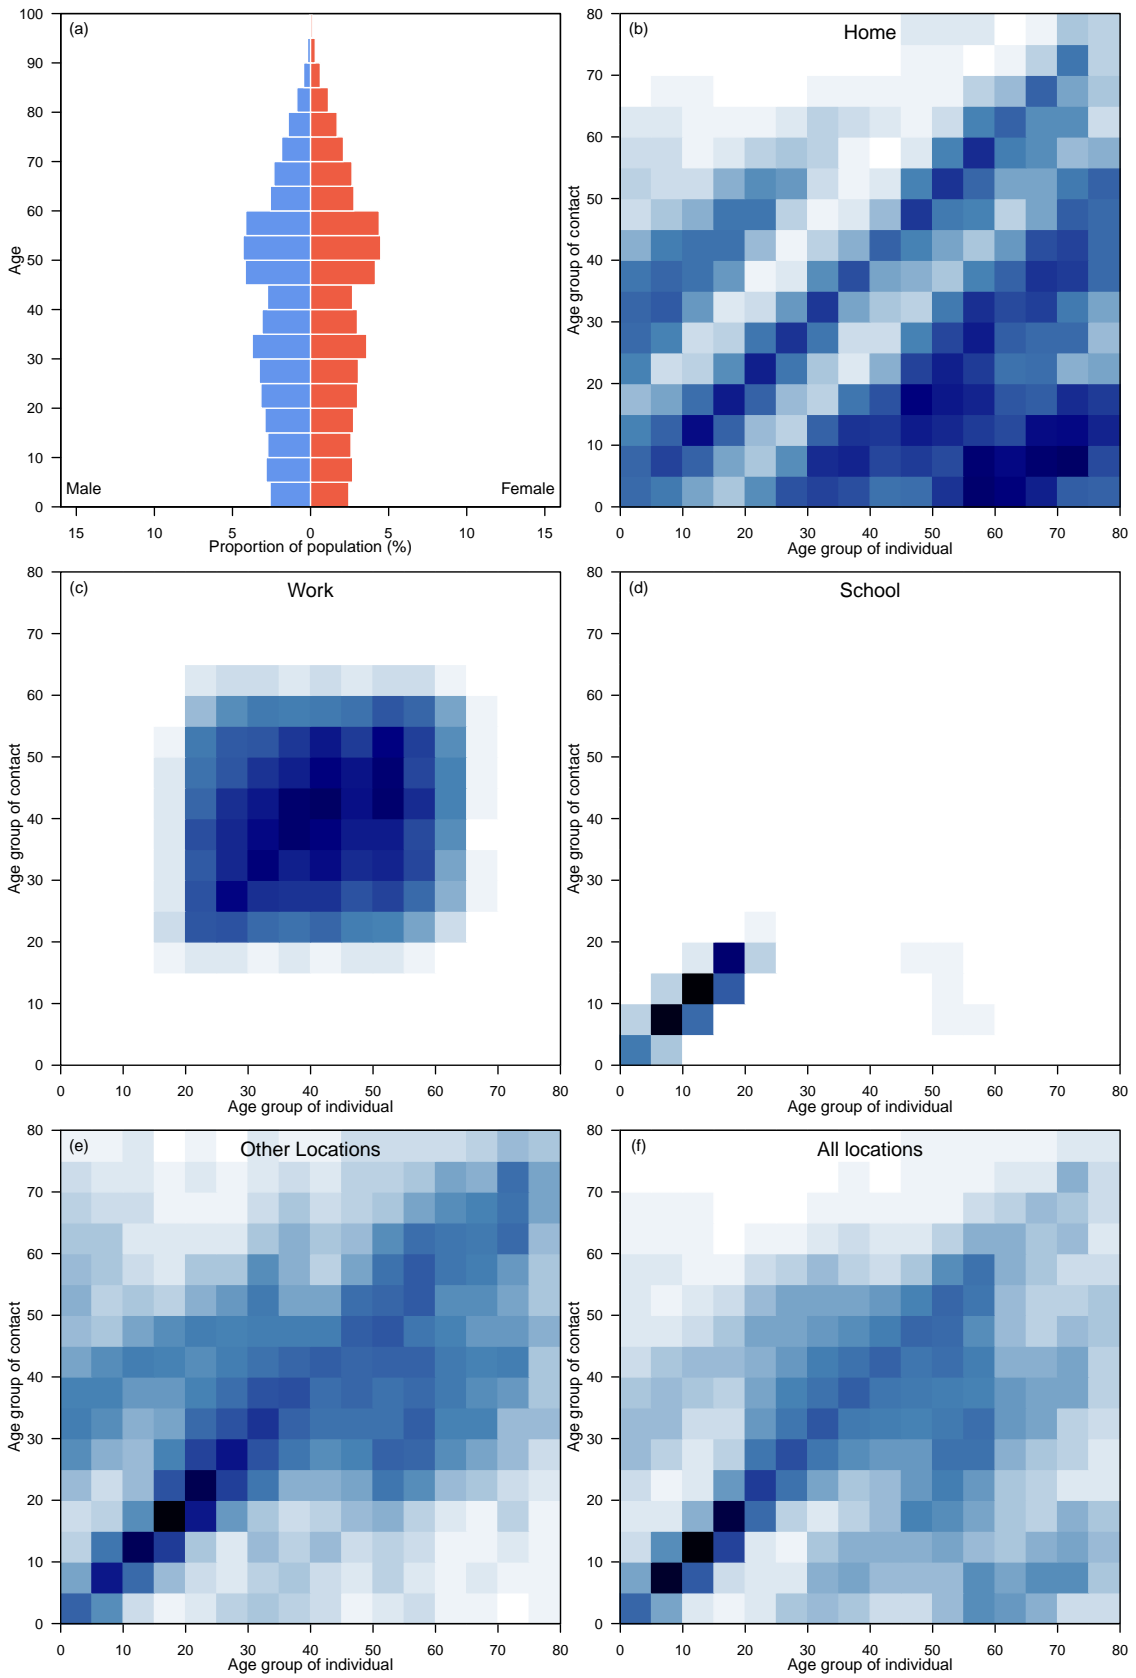

# Cyprus

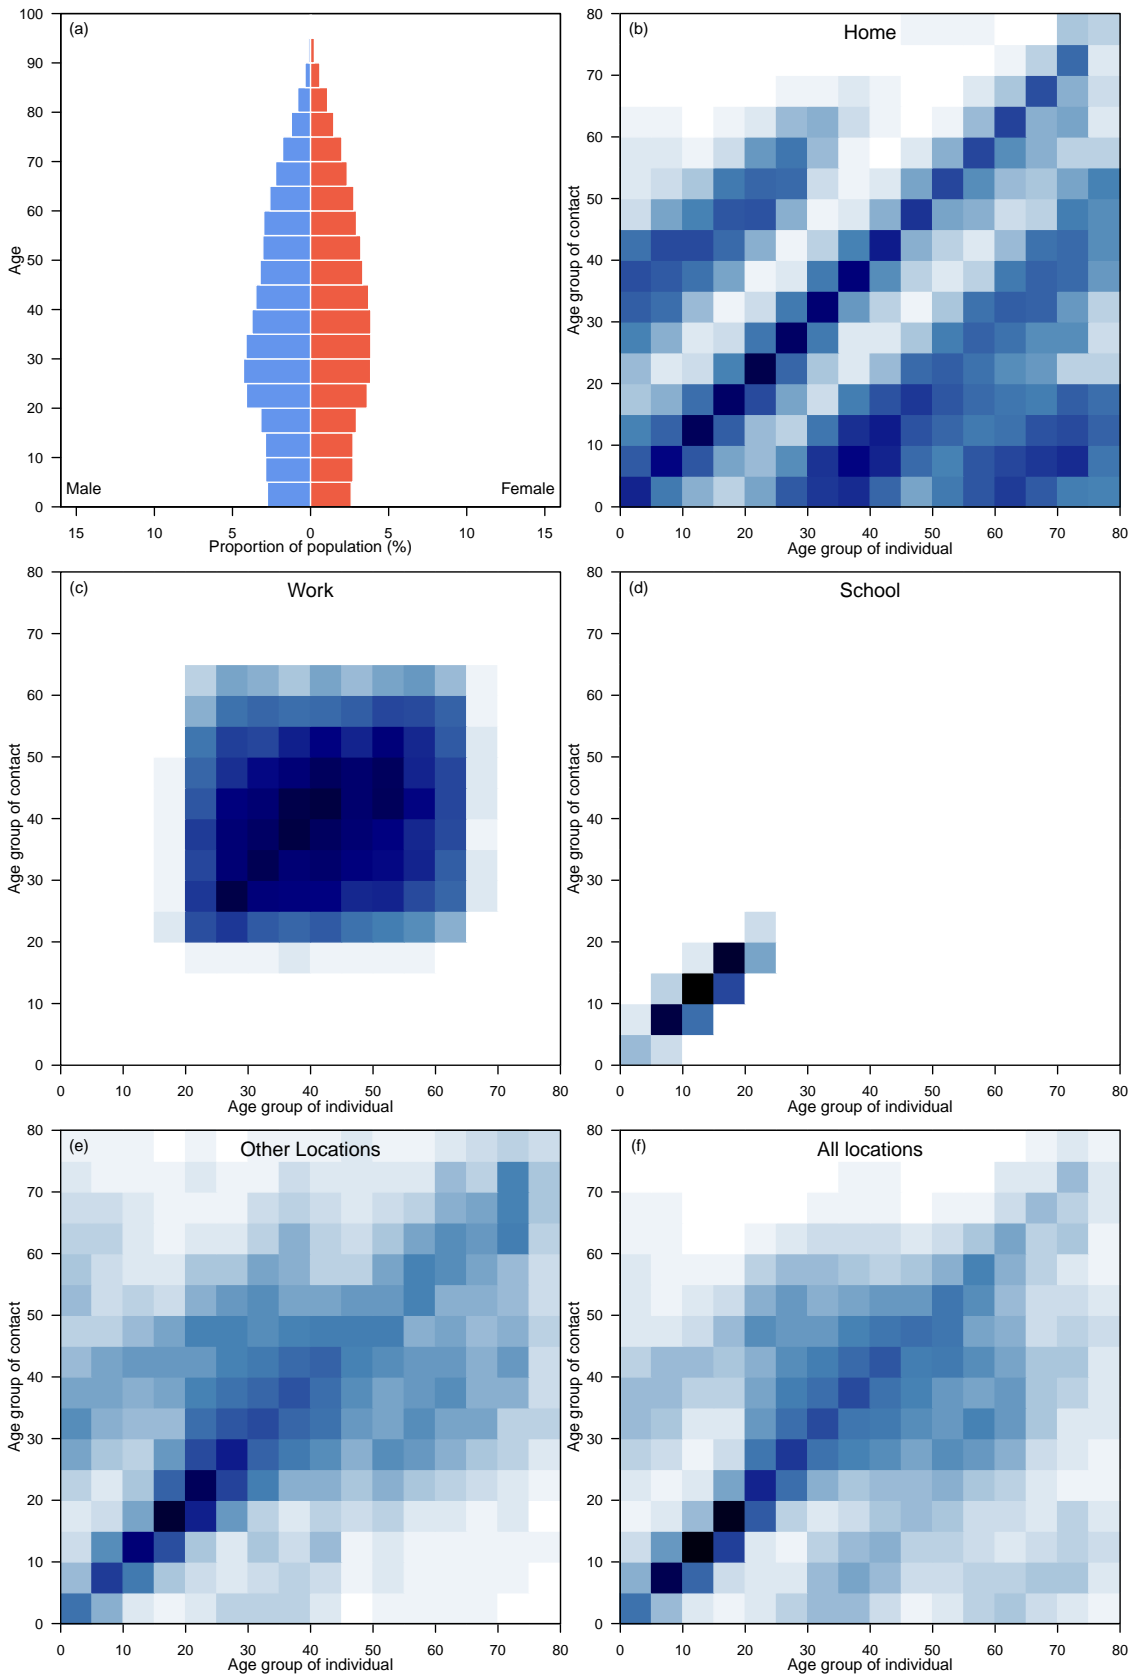

# Czechia

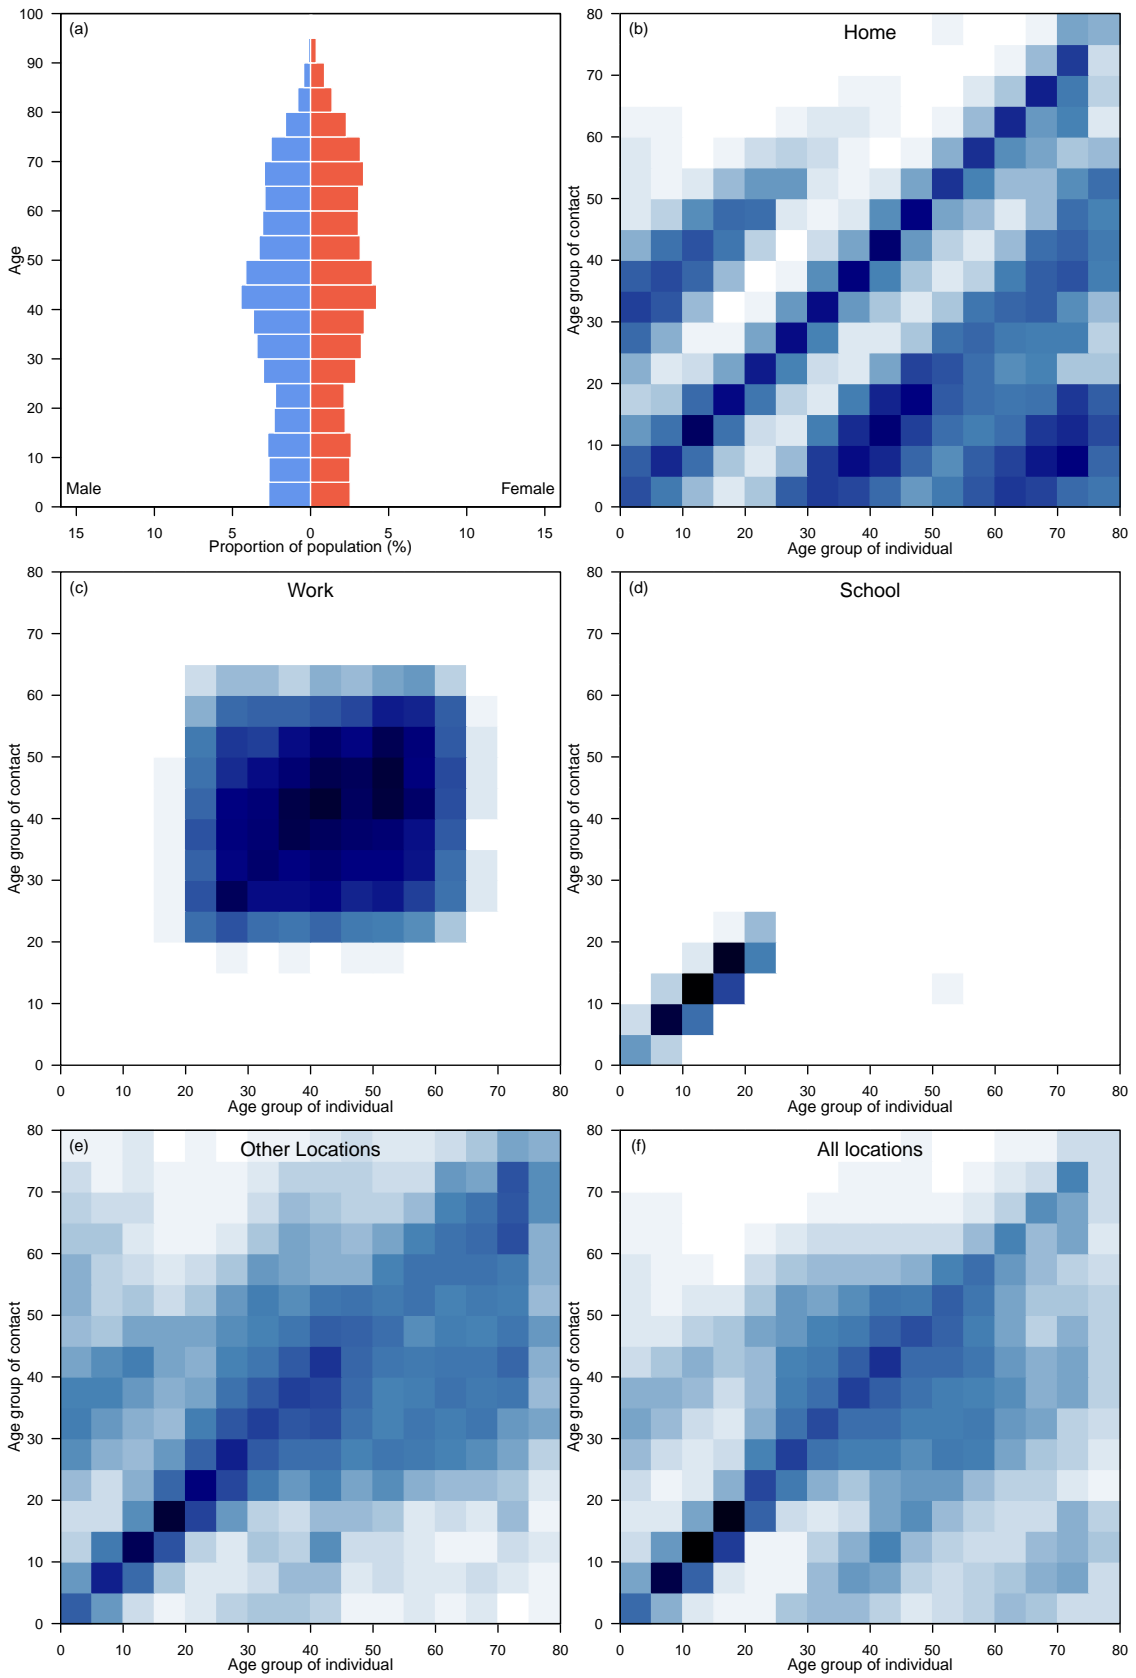

# Dem. People's Republic of Korea

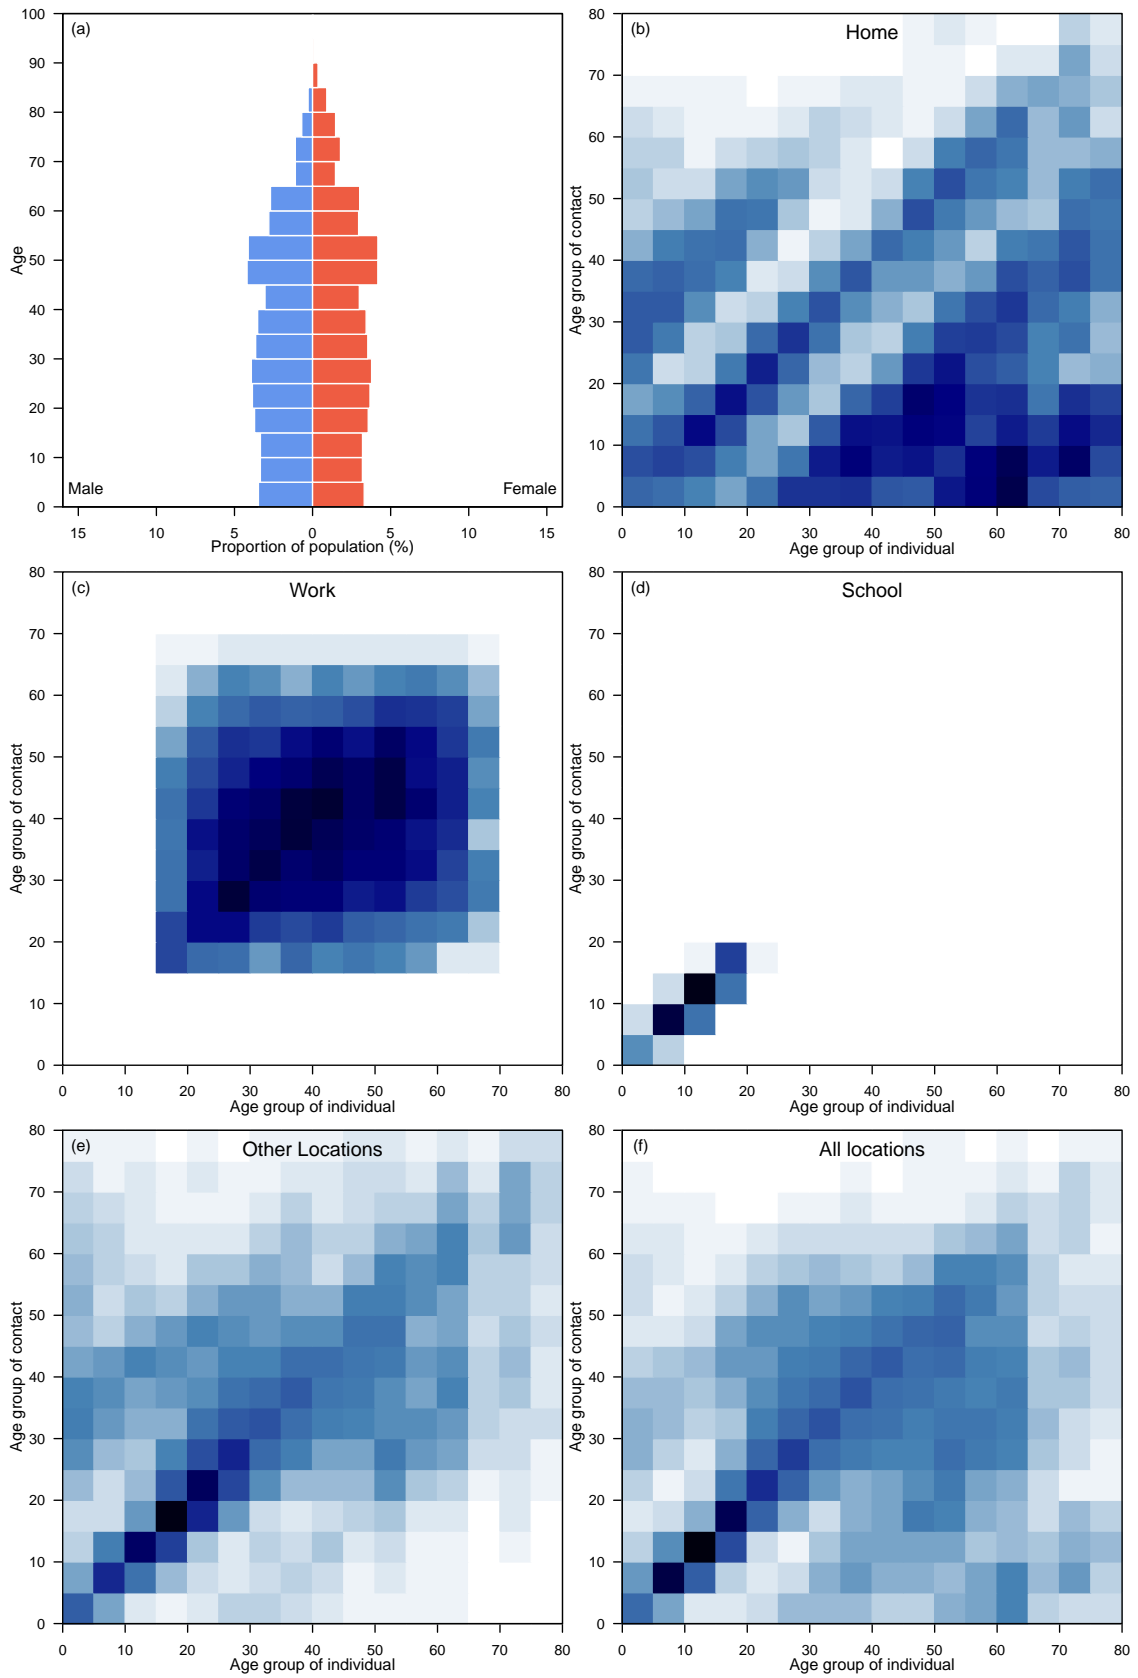

# Democratic Republic of the Congo

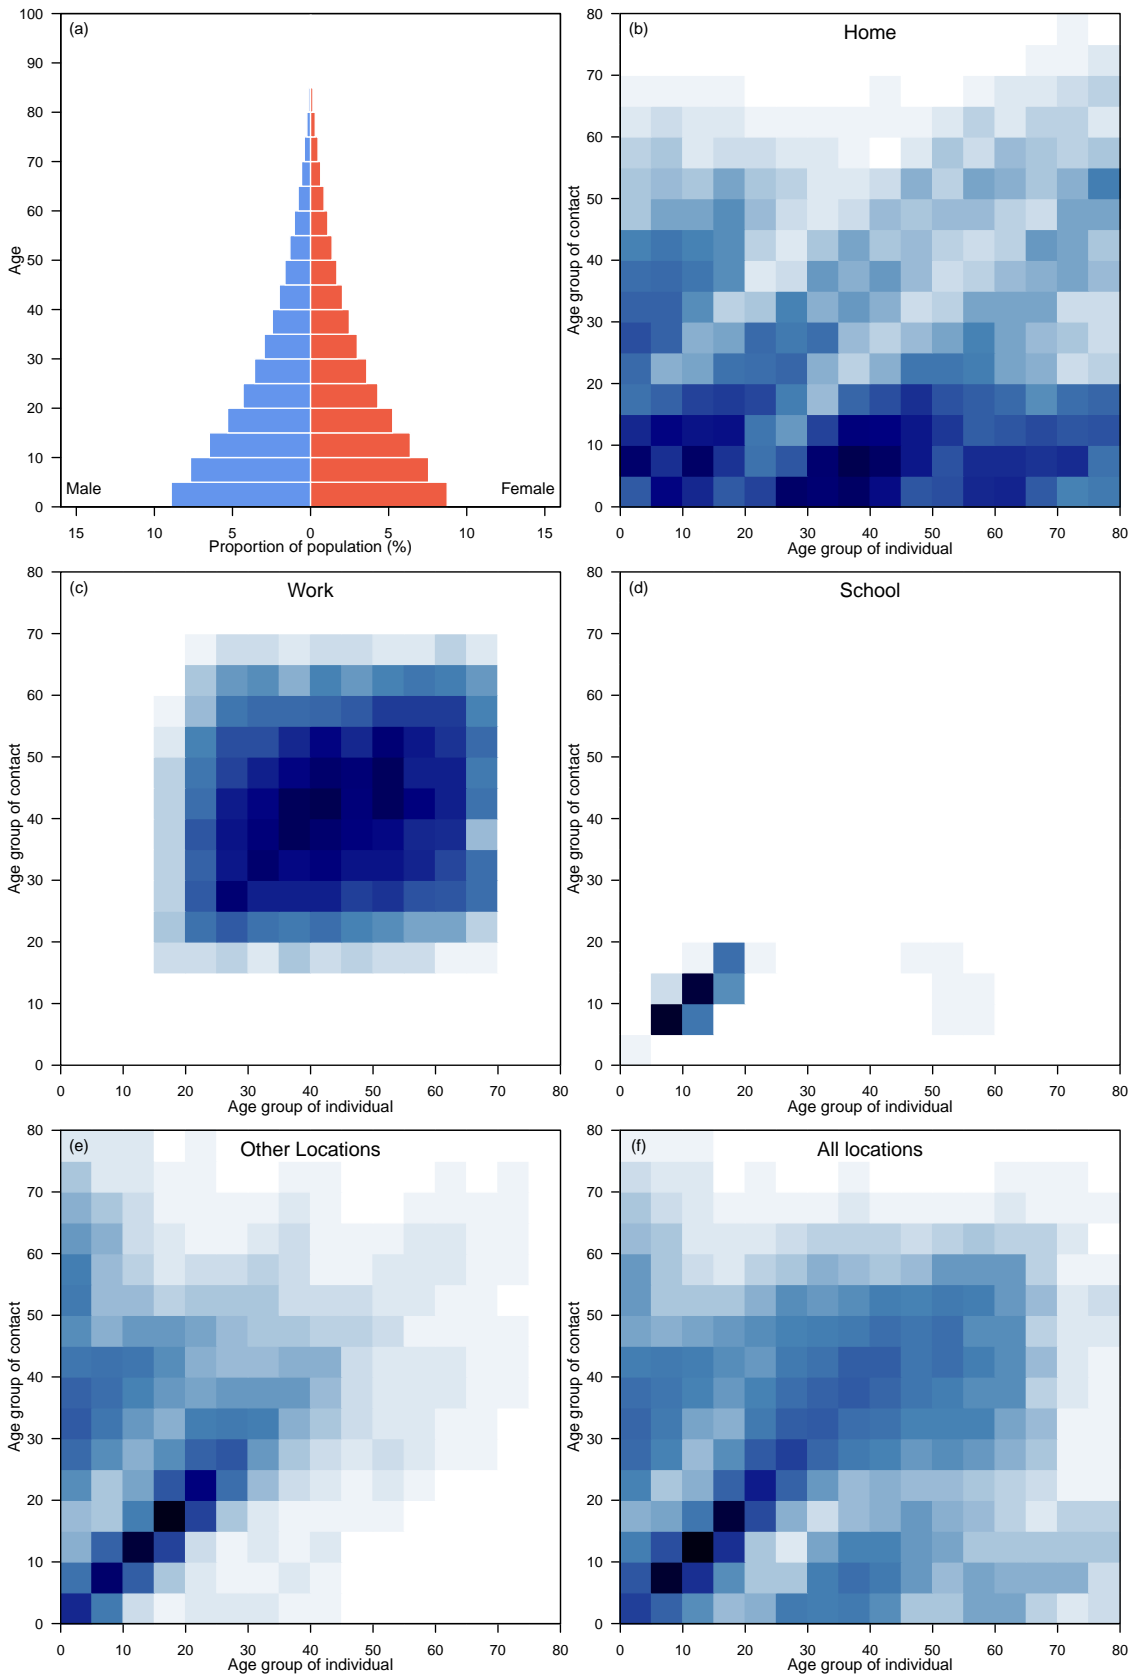

# Denmark

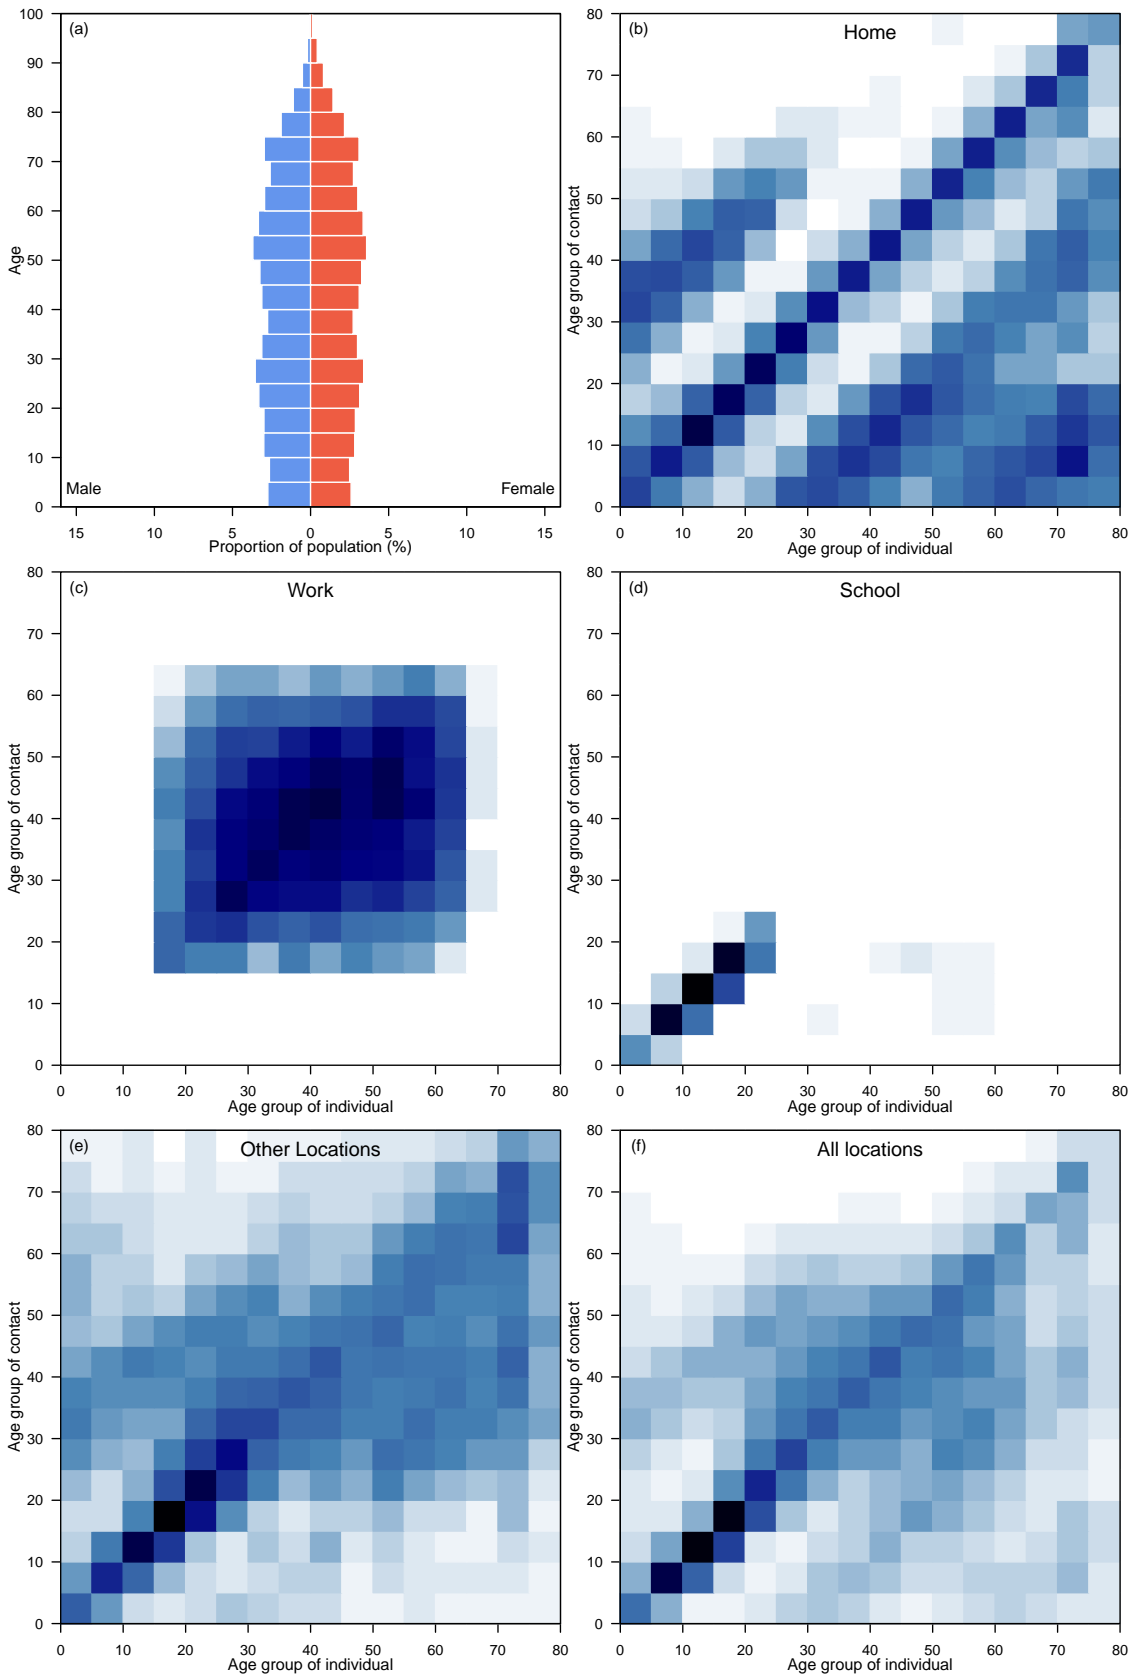

# Djibouti

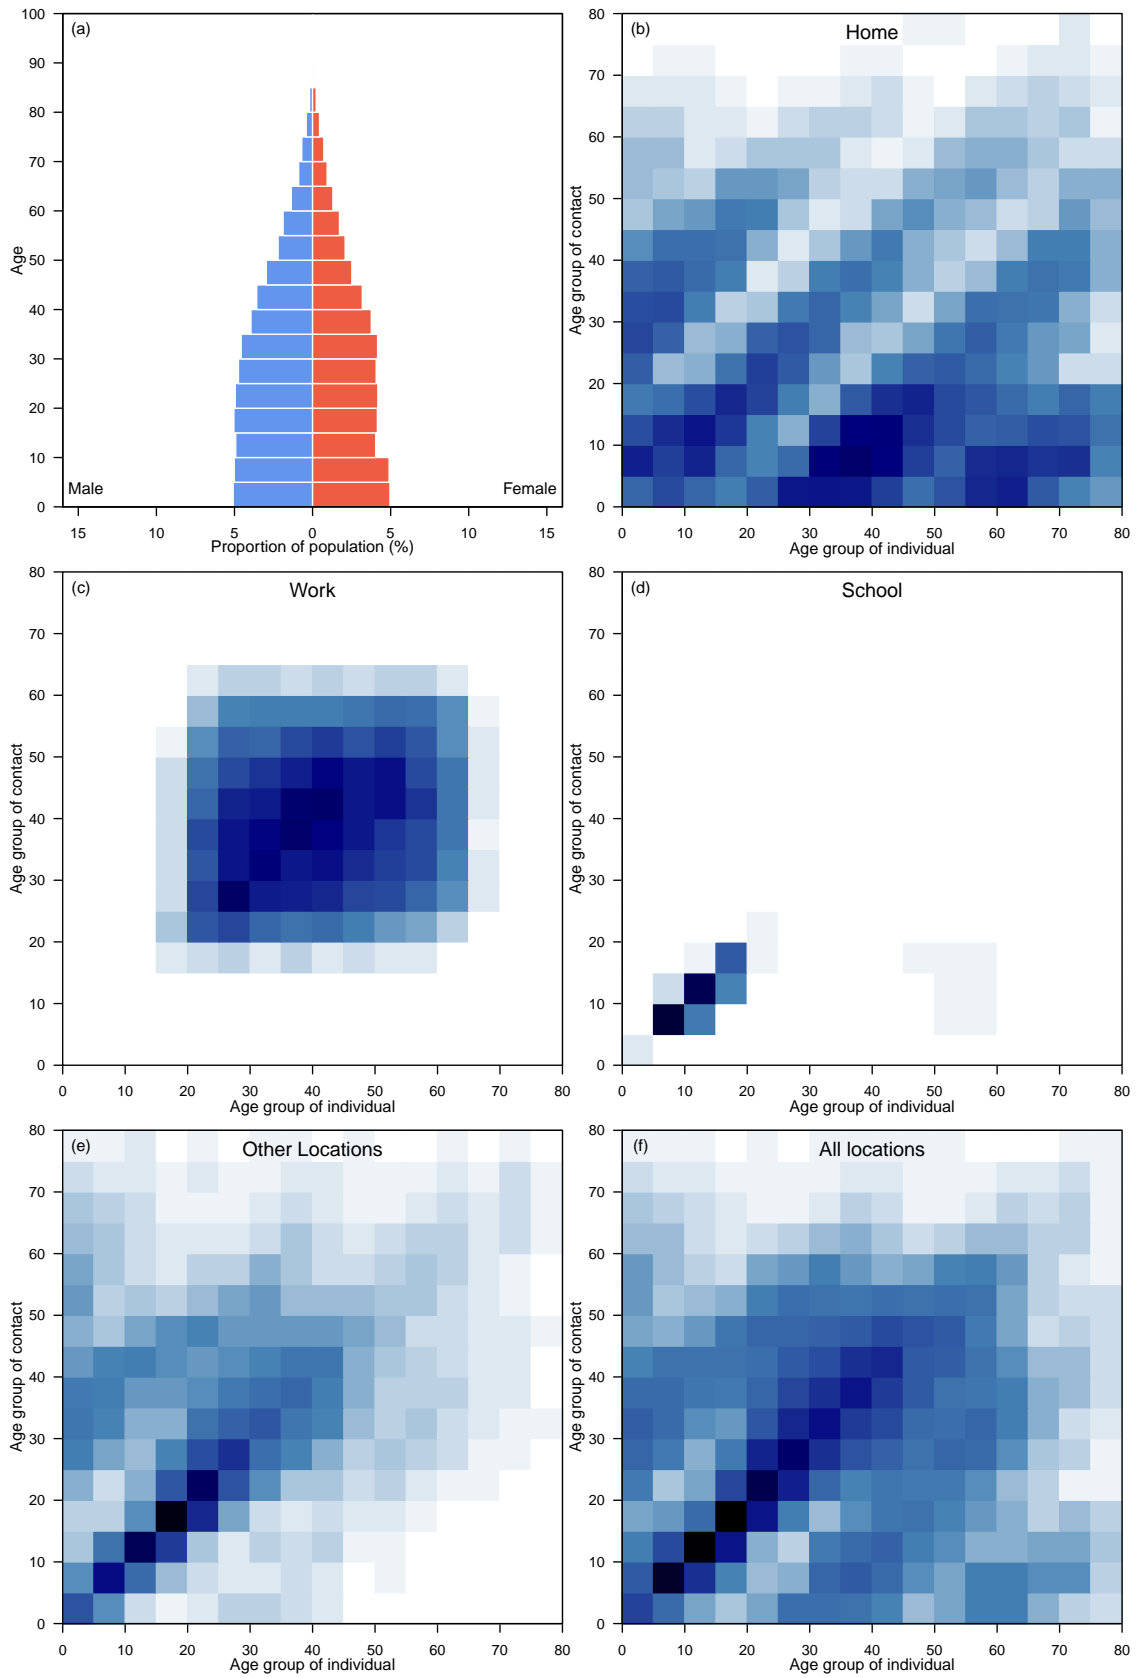

# Dominican Republic

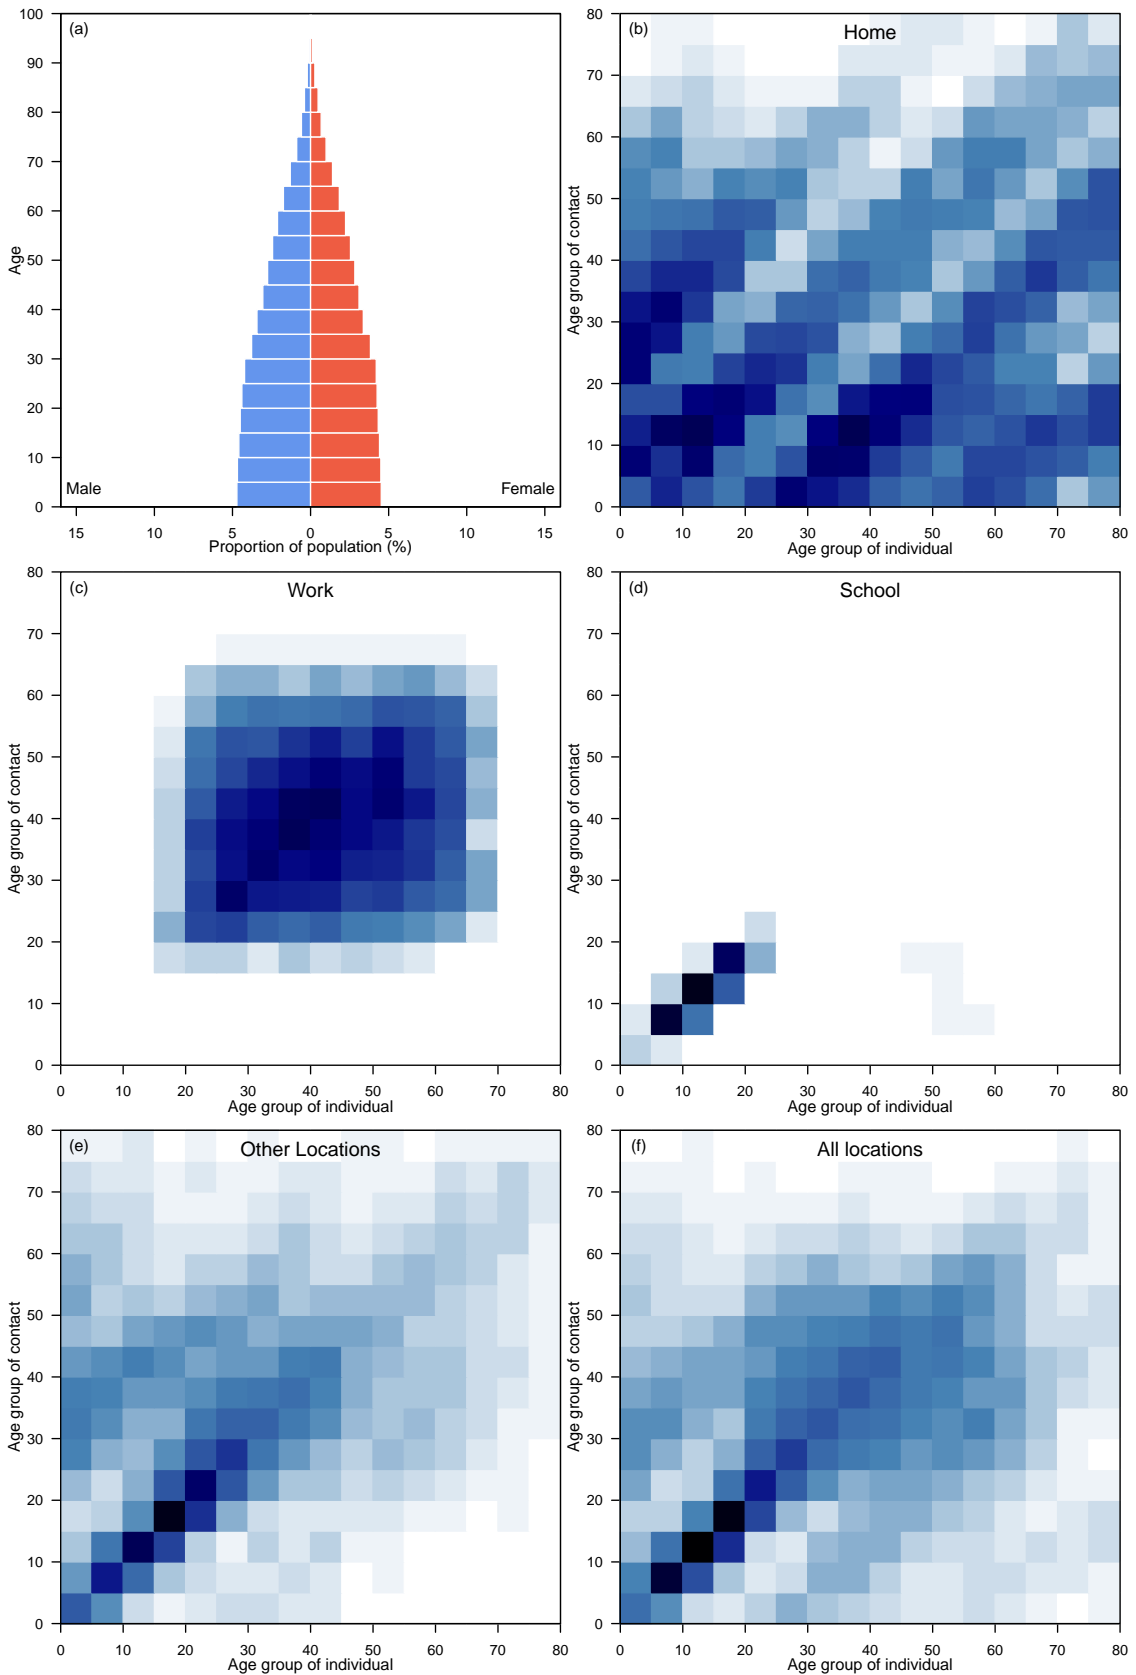



# Ecuador

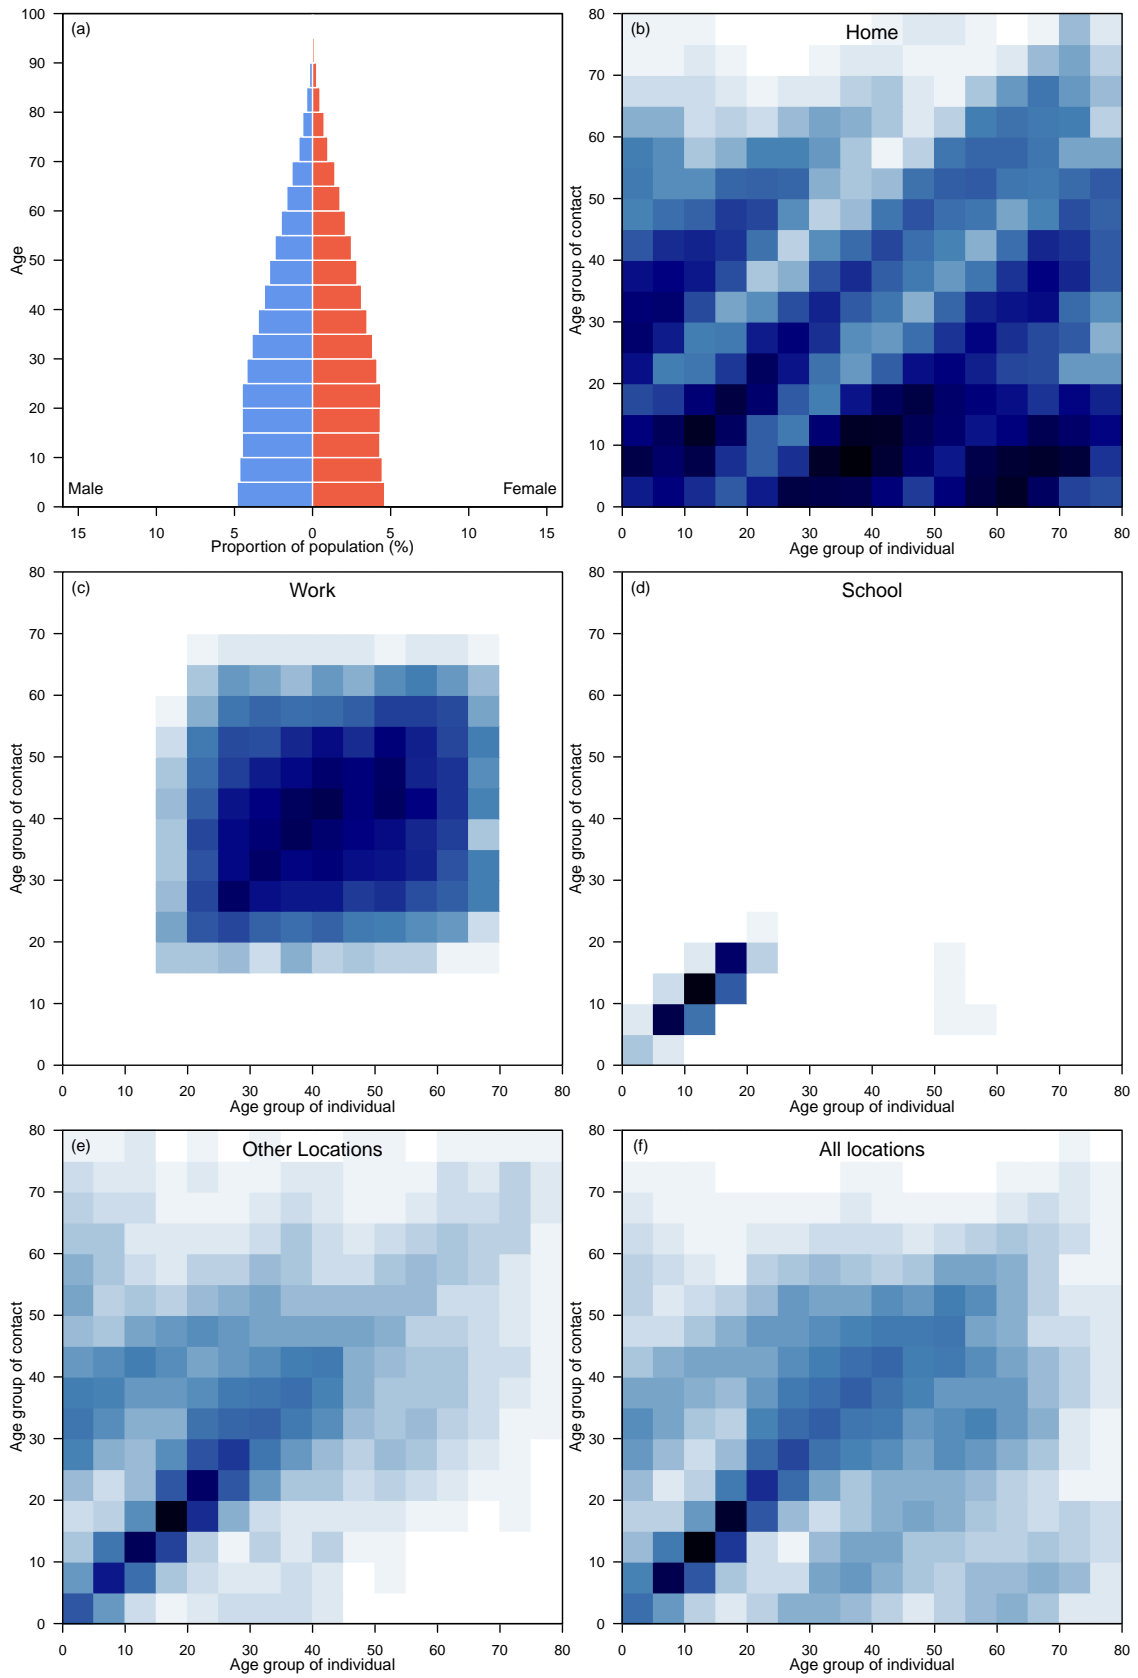

# Egypt

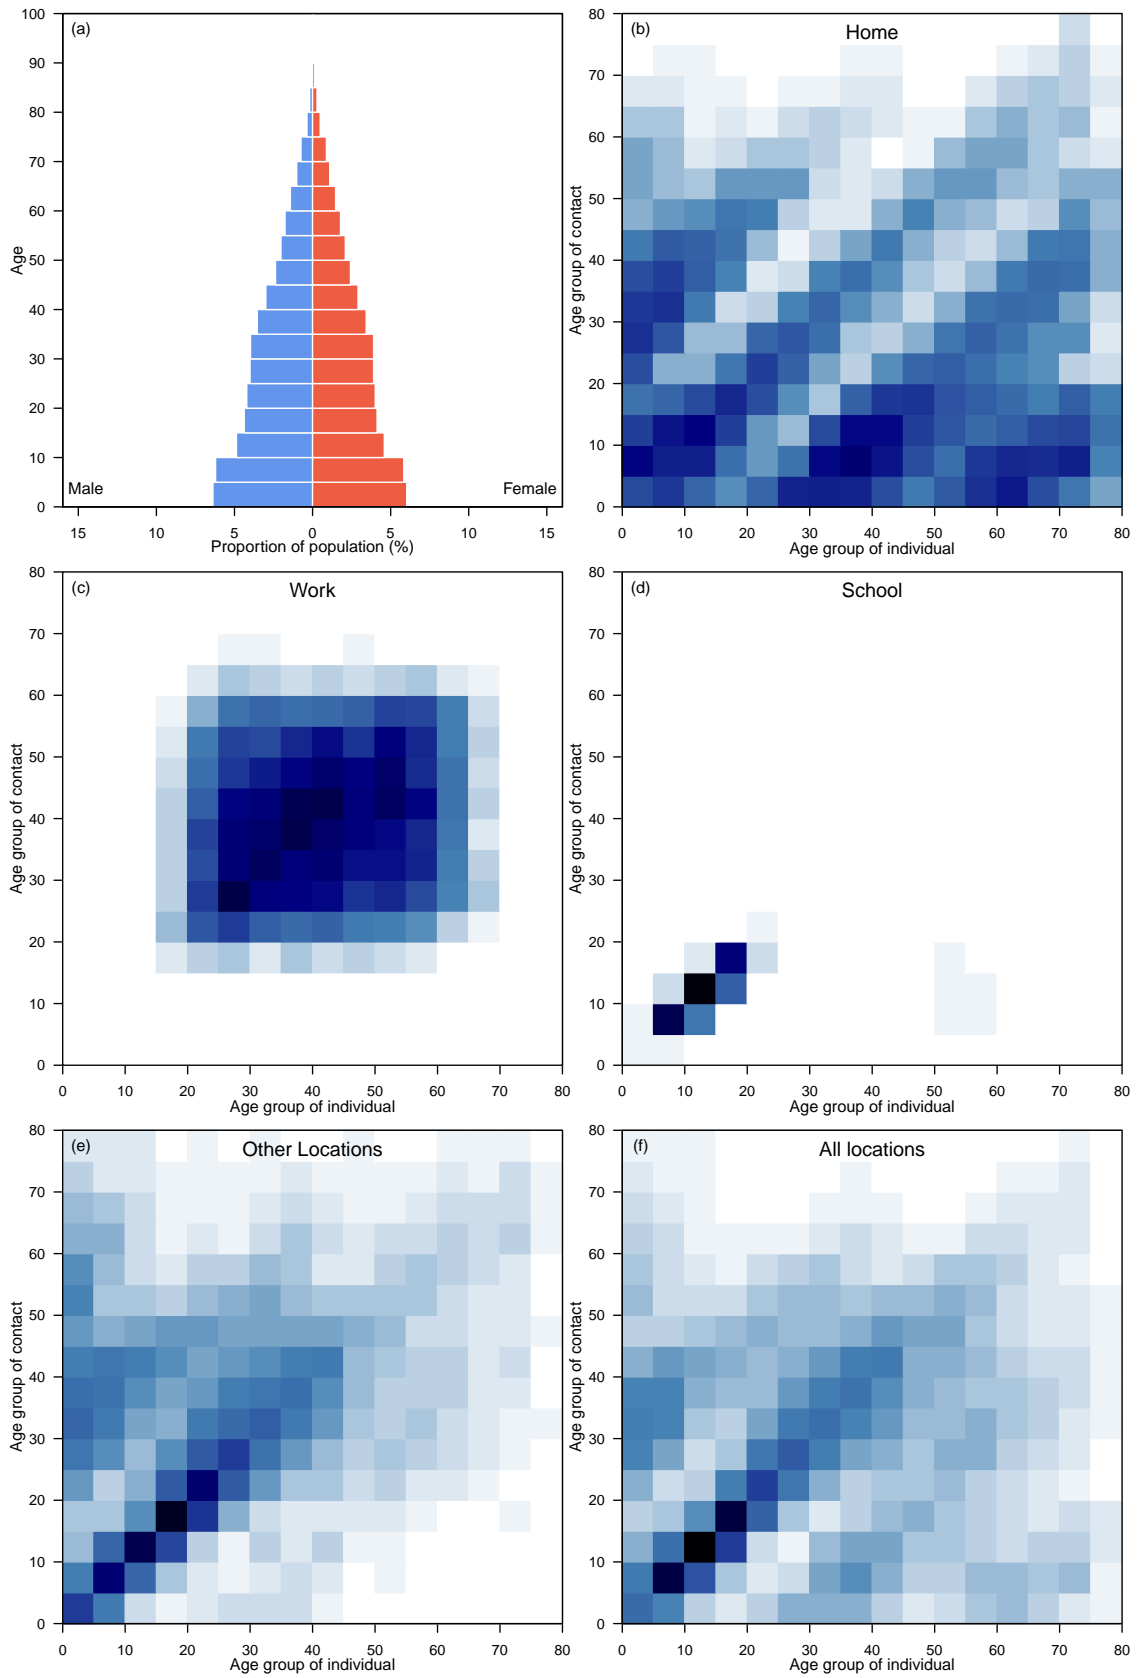

# El Salvador

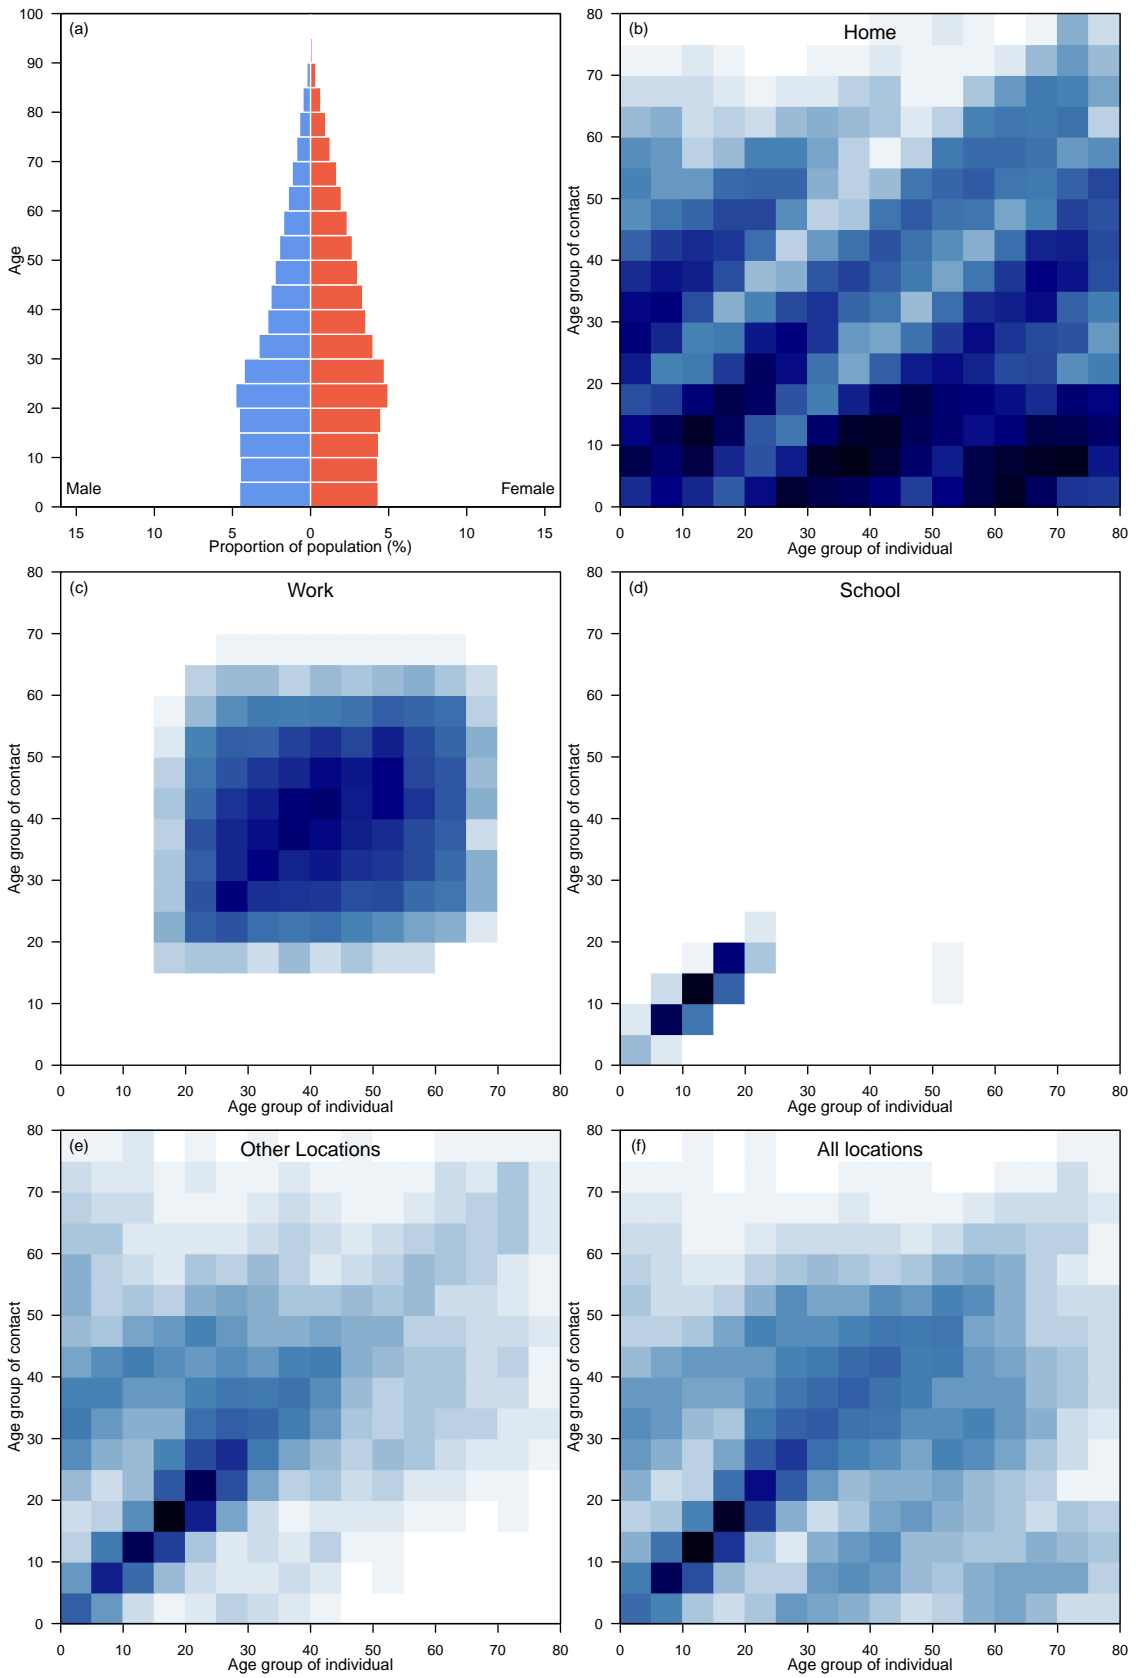

# Equatorial Guinea

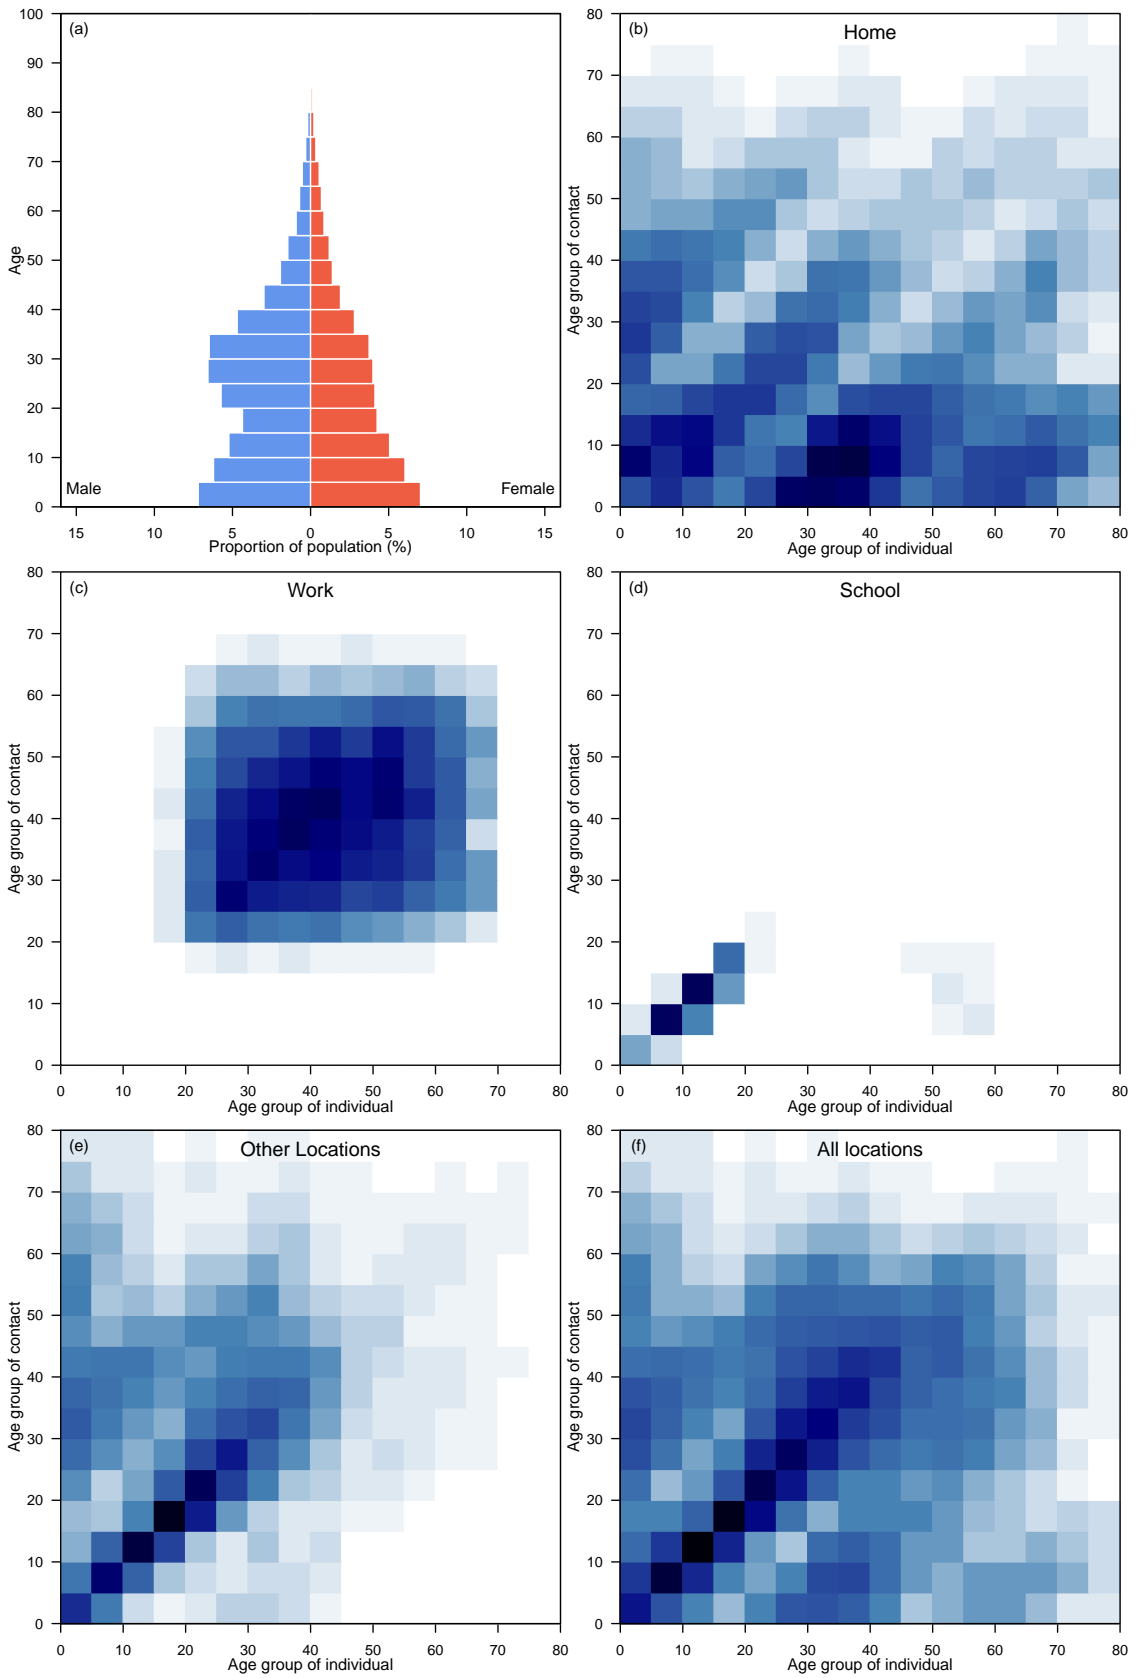

# Eritrea

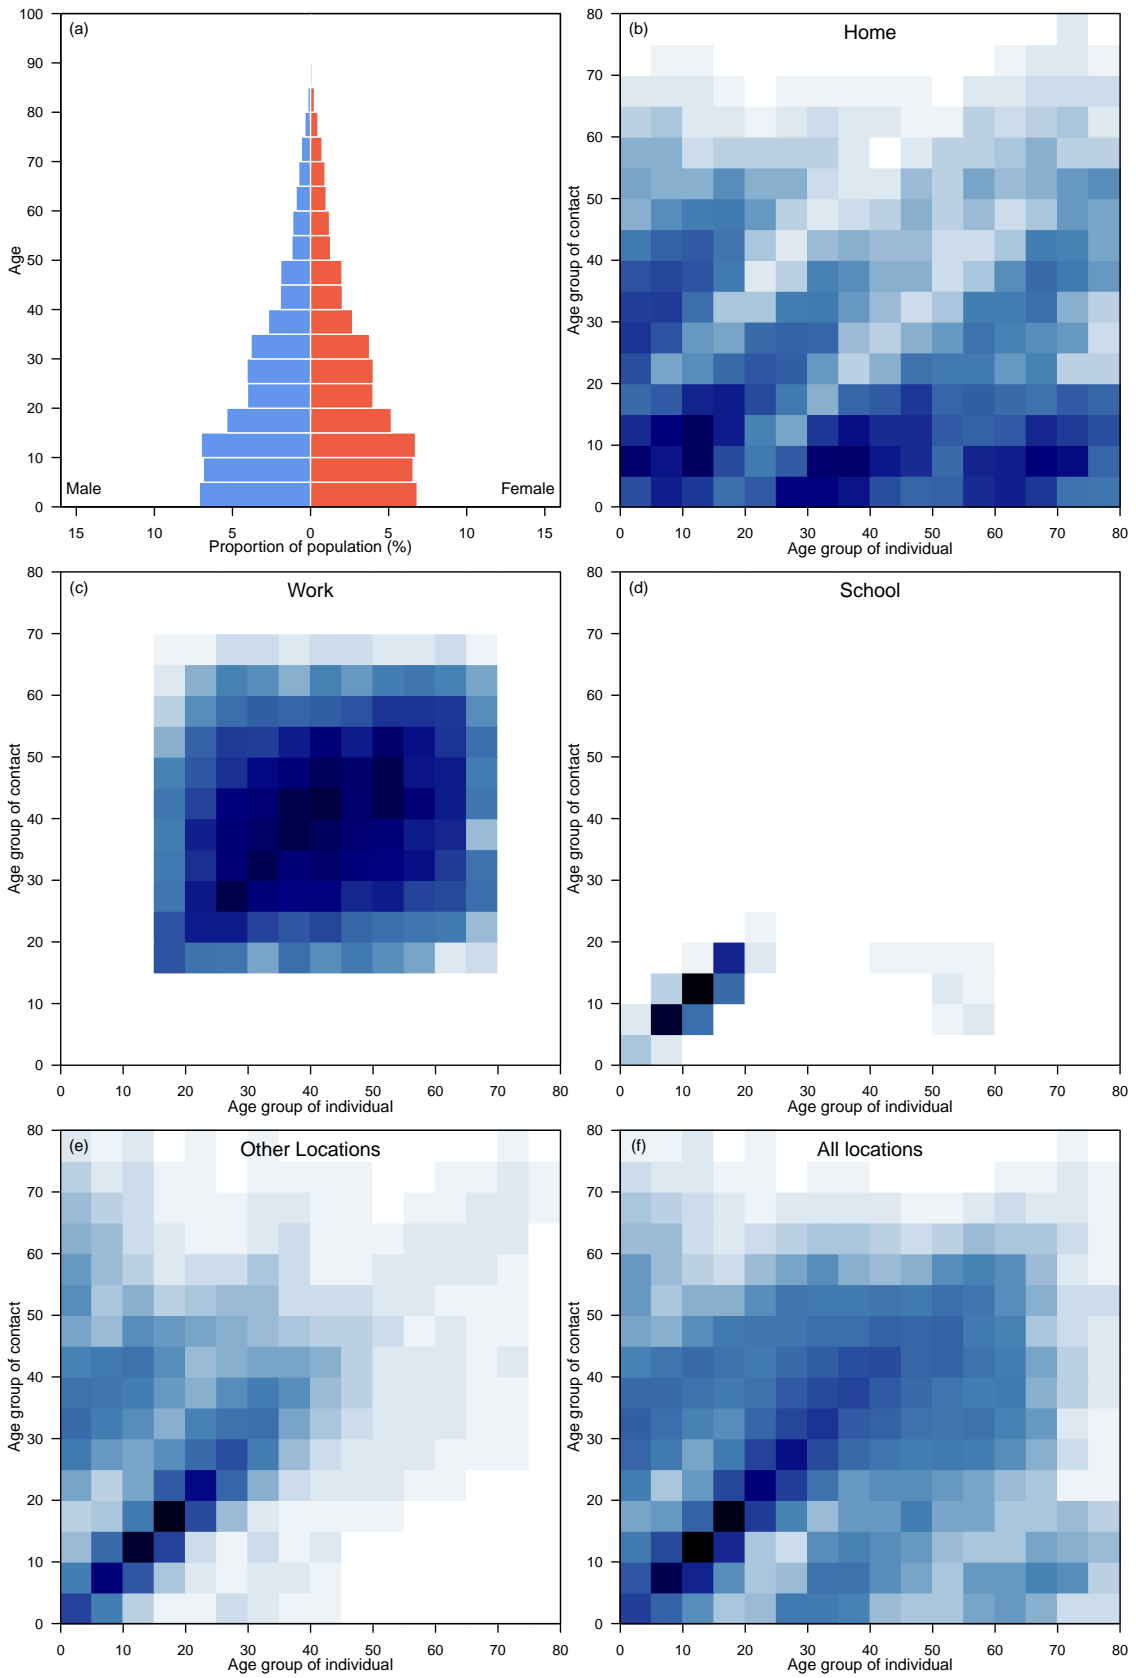

# Estonia

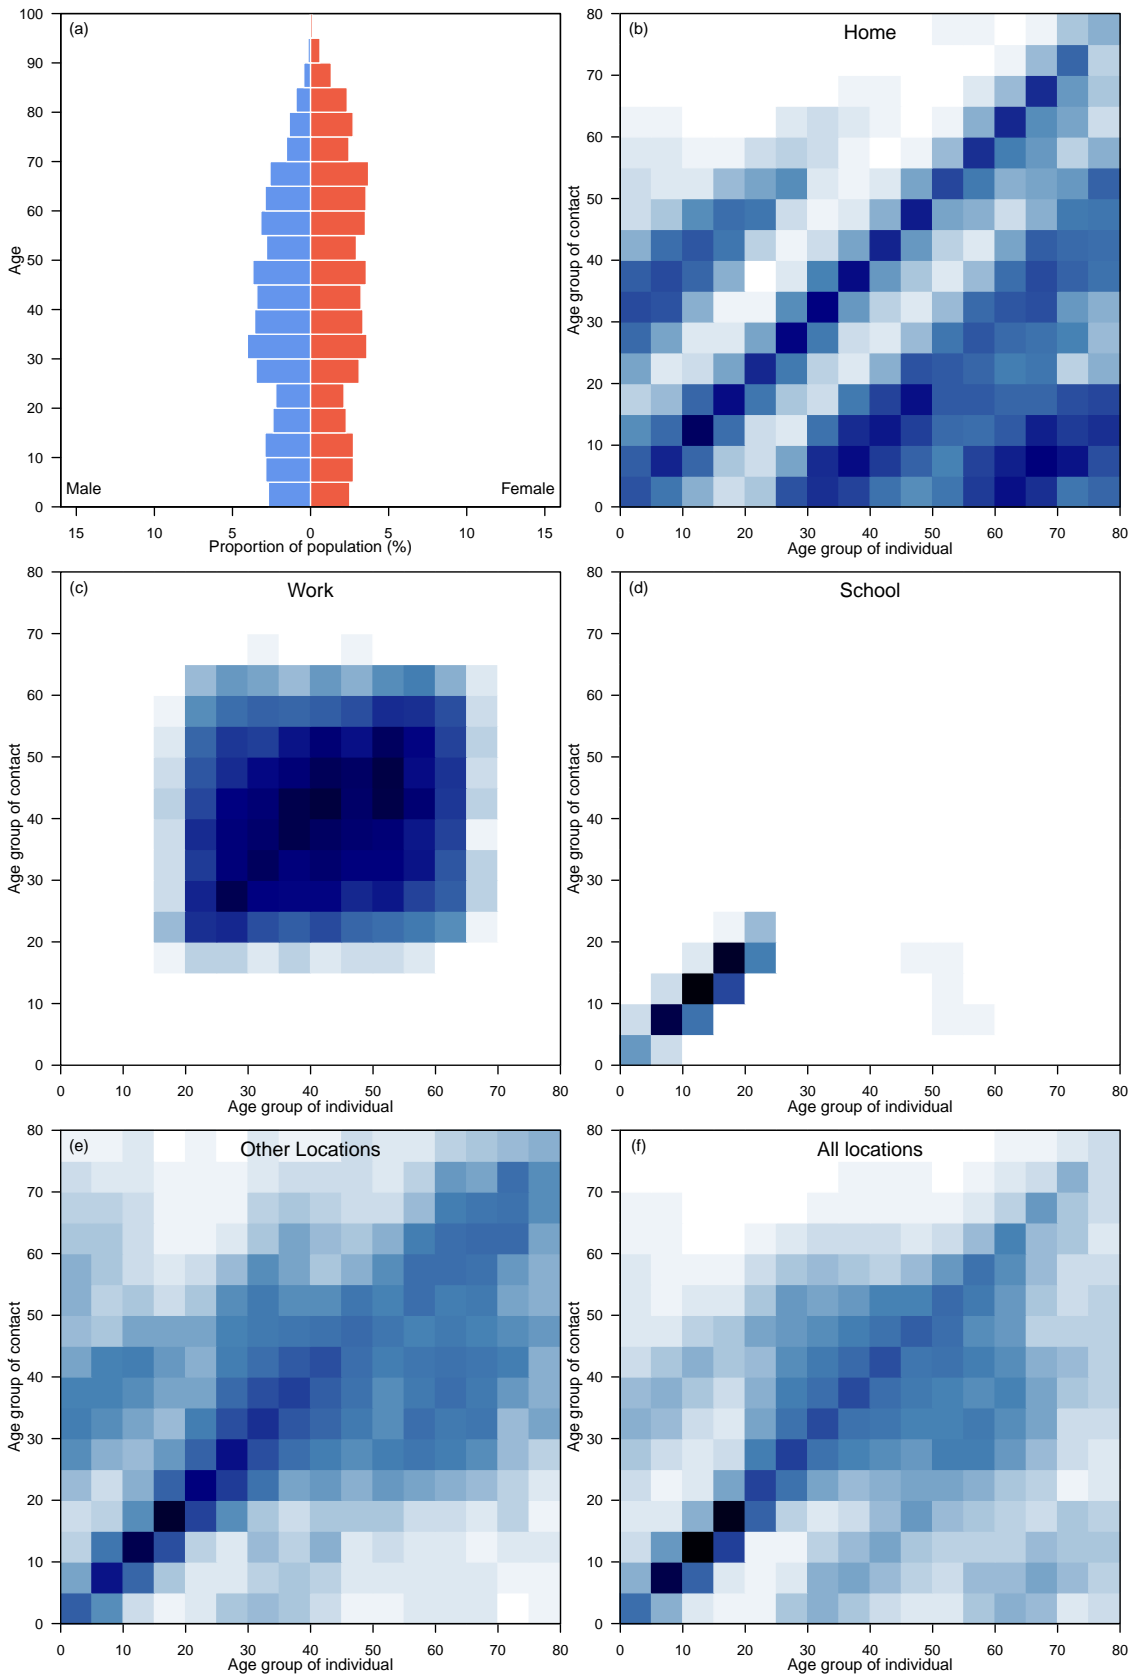

# Eswatini

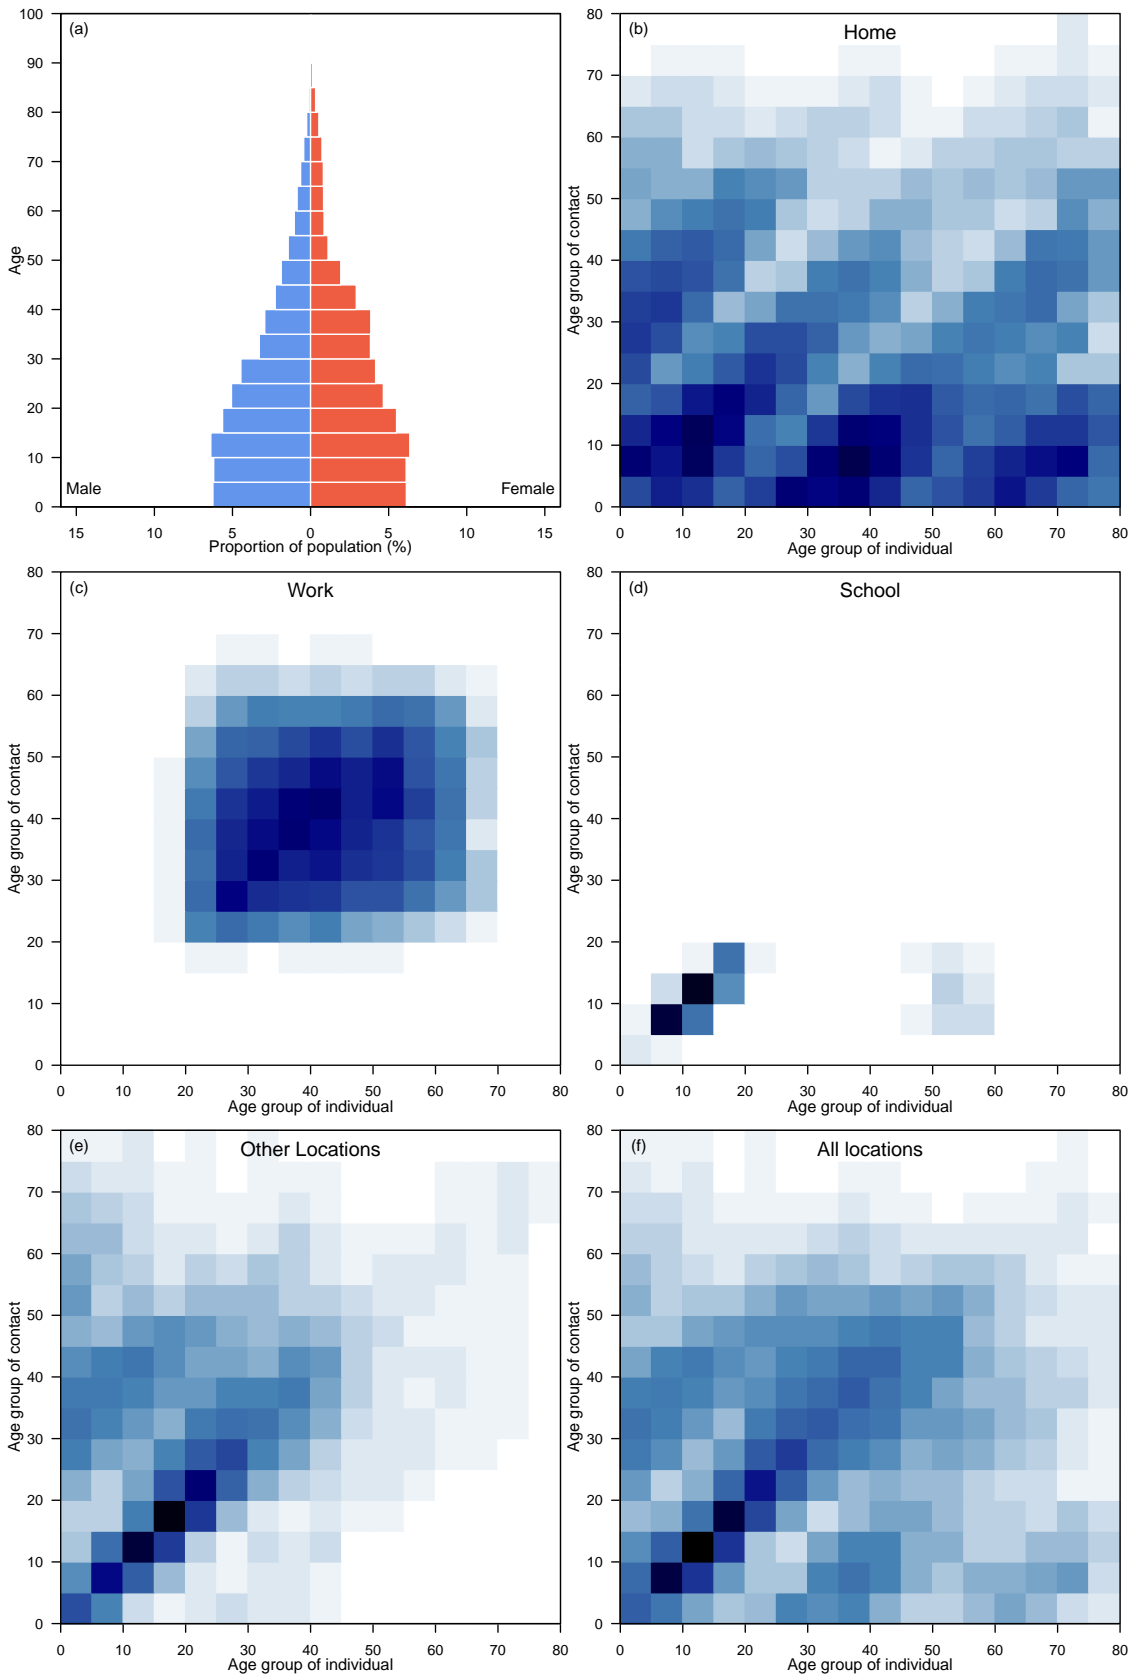

# Ethiopia

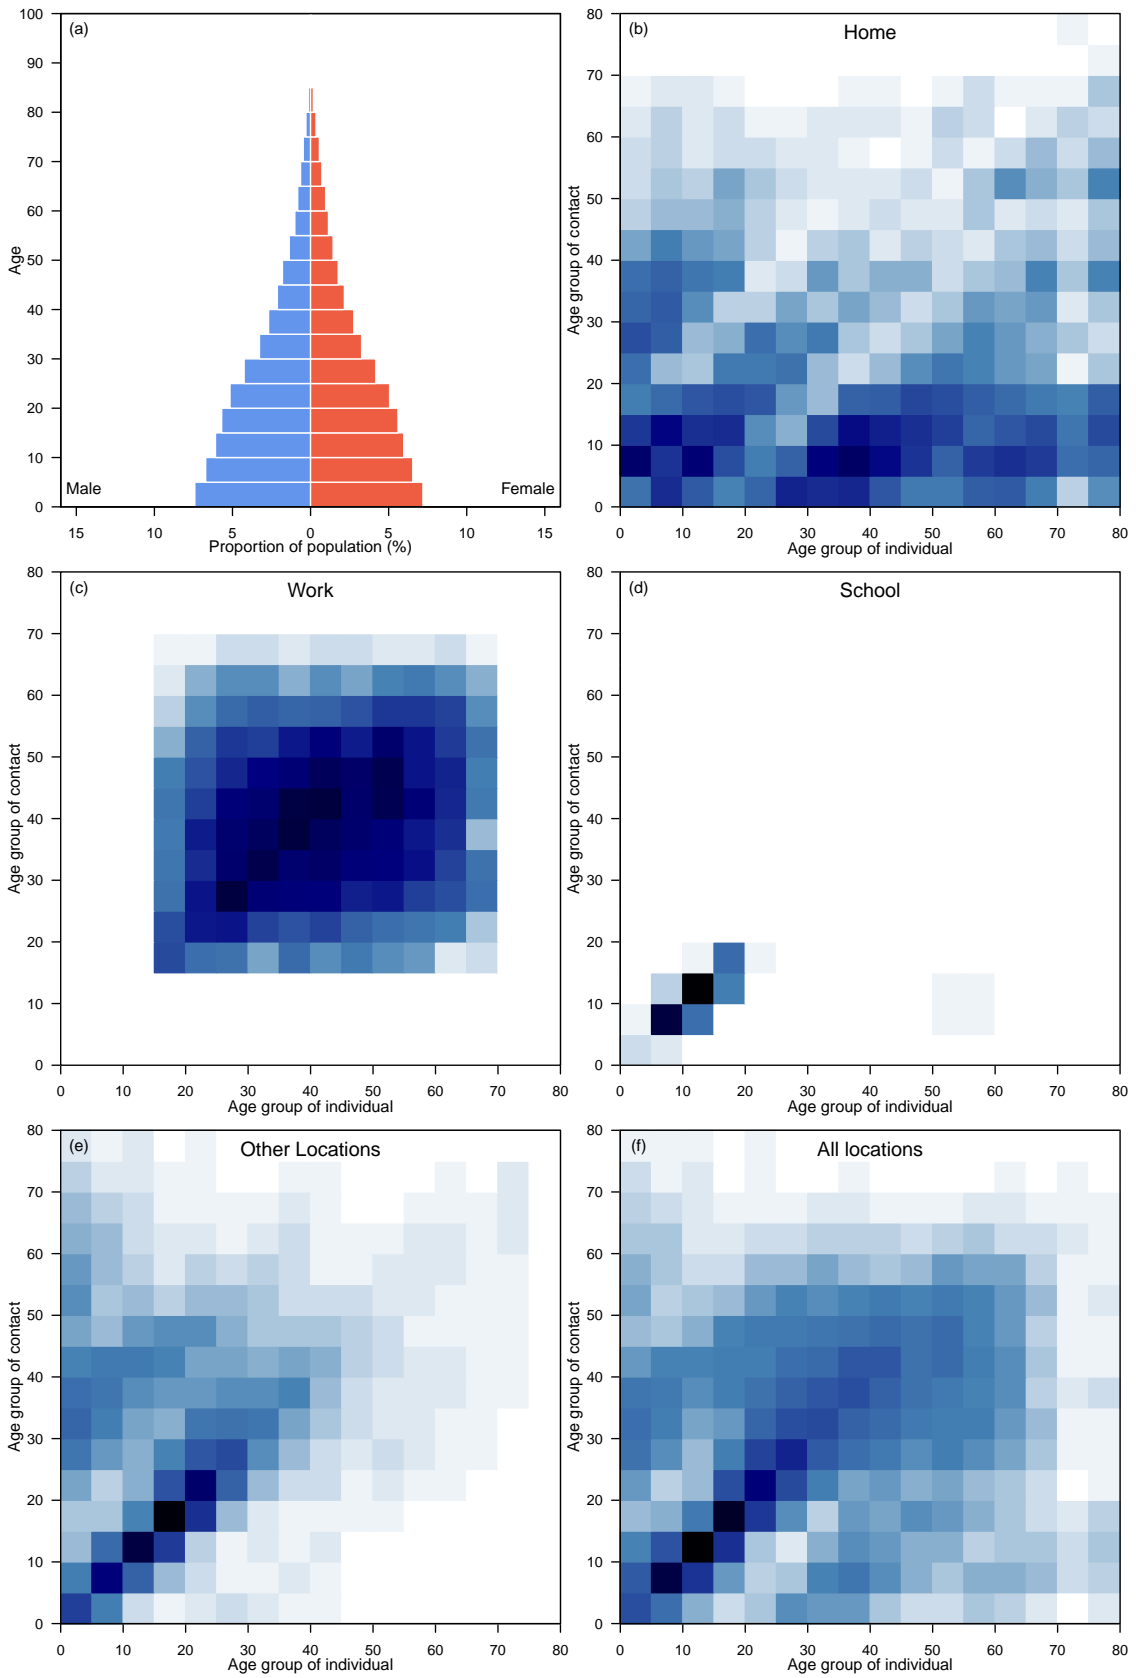



# Fiji

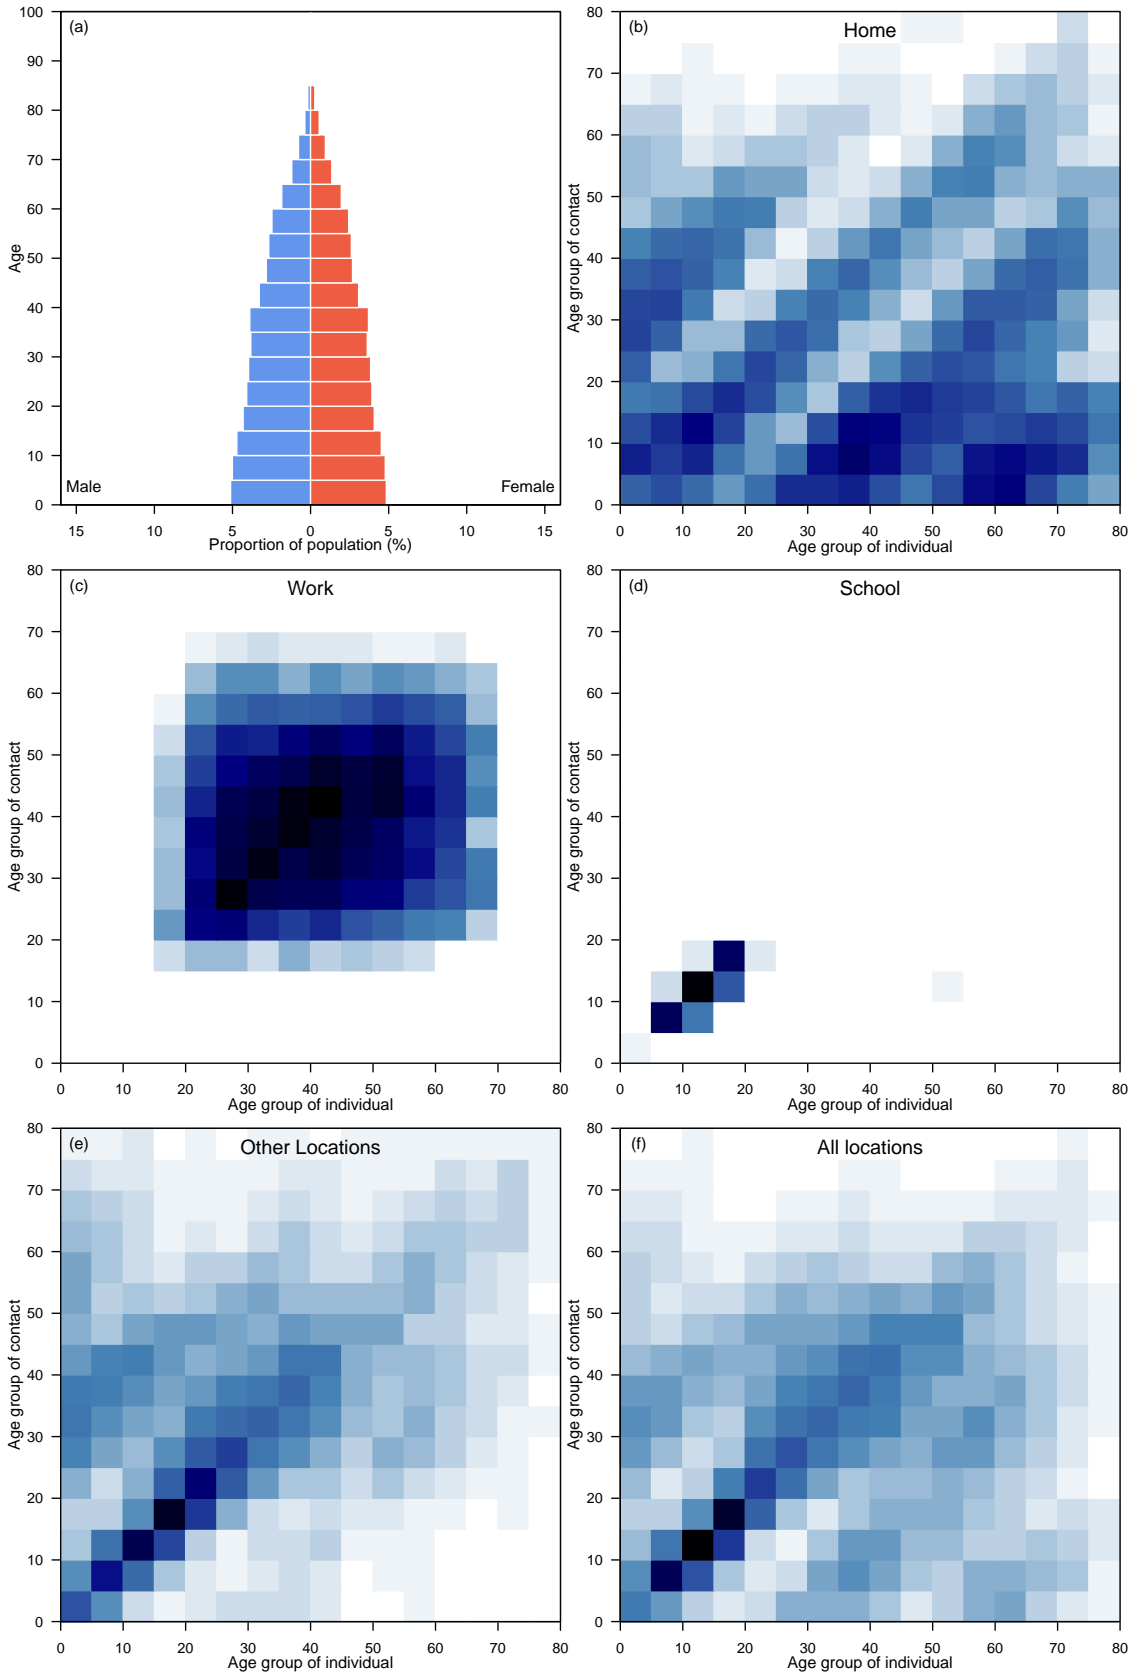

# Finland

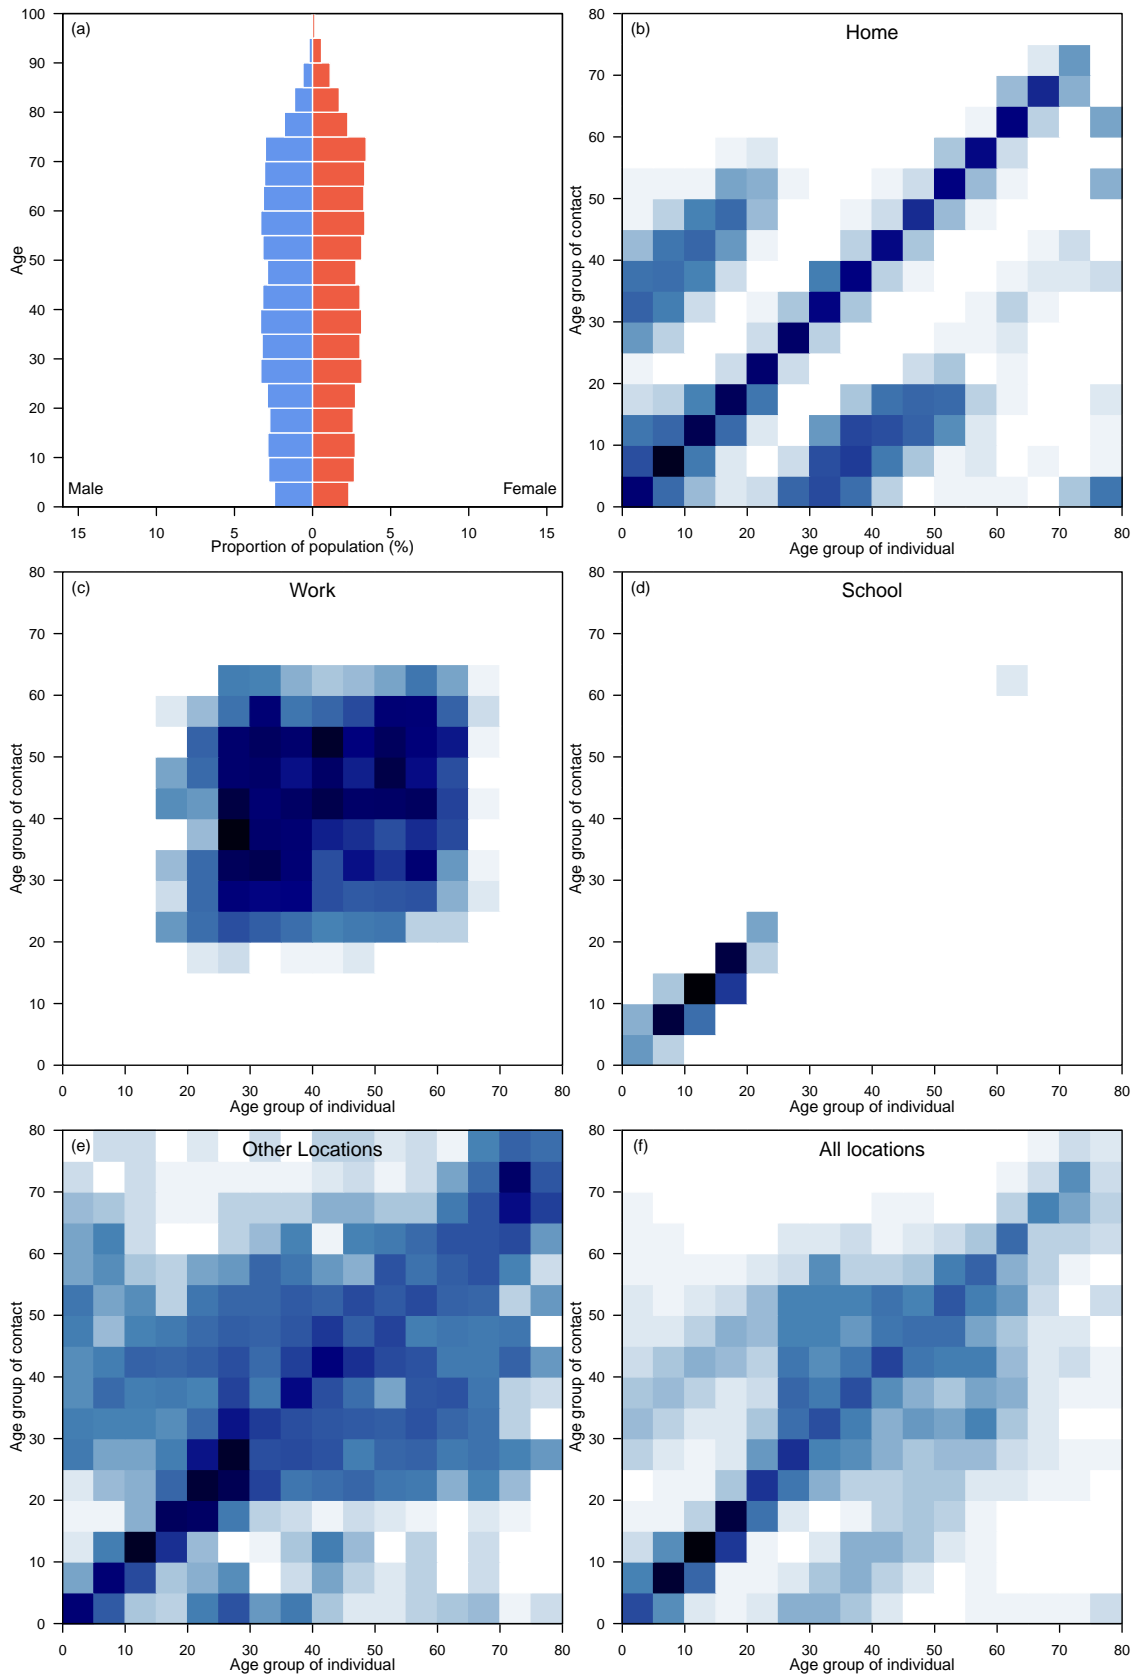

# France

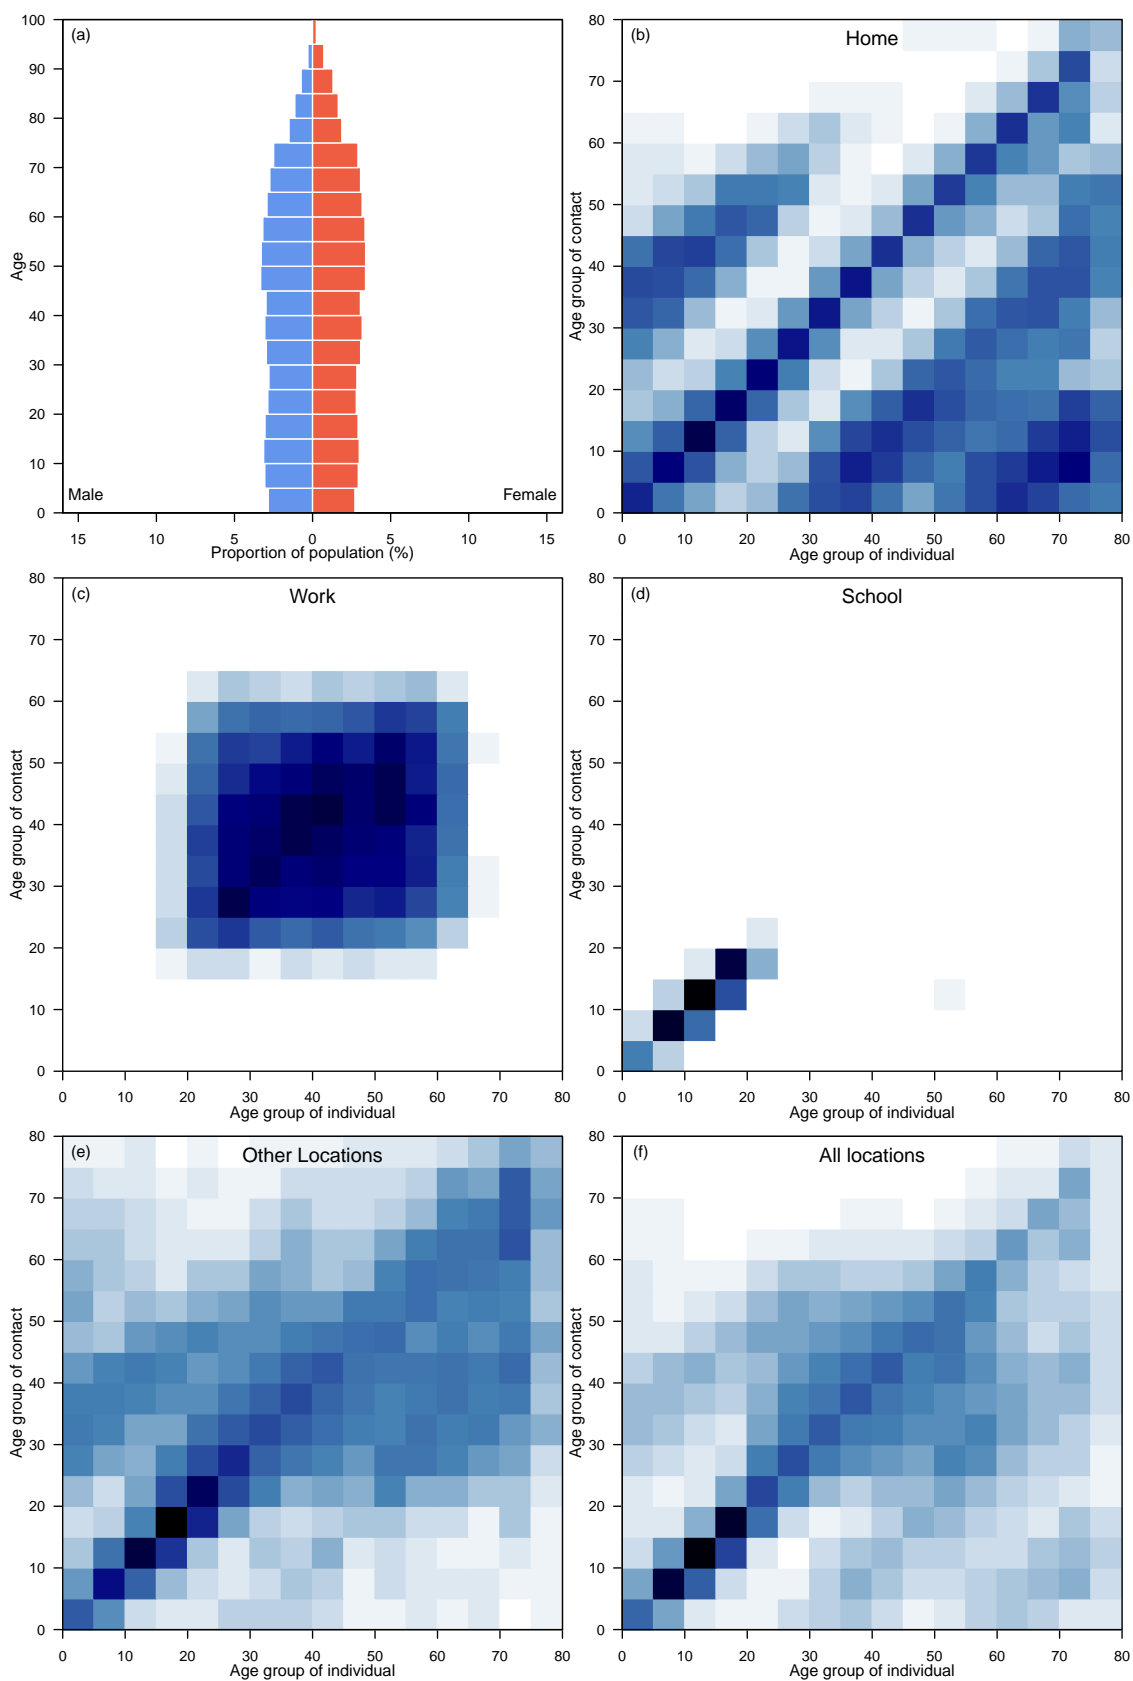

# Gabon

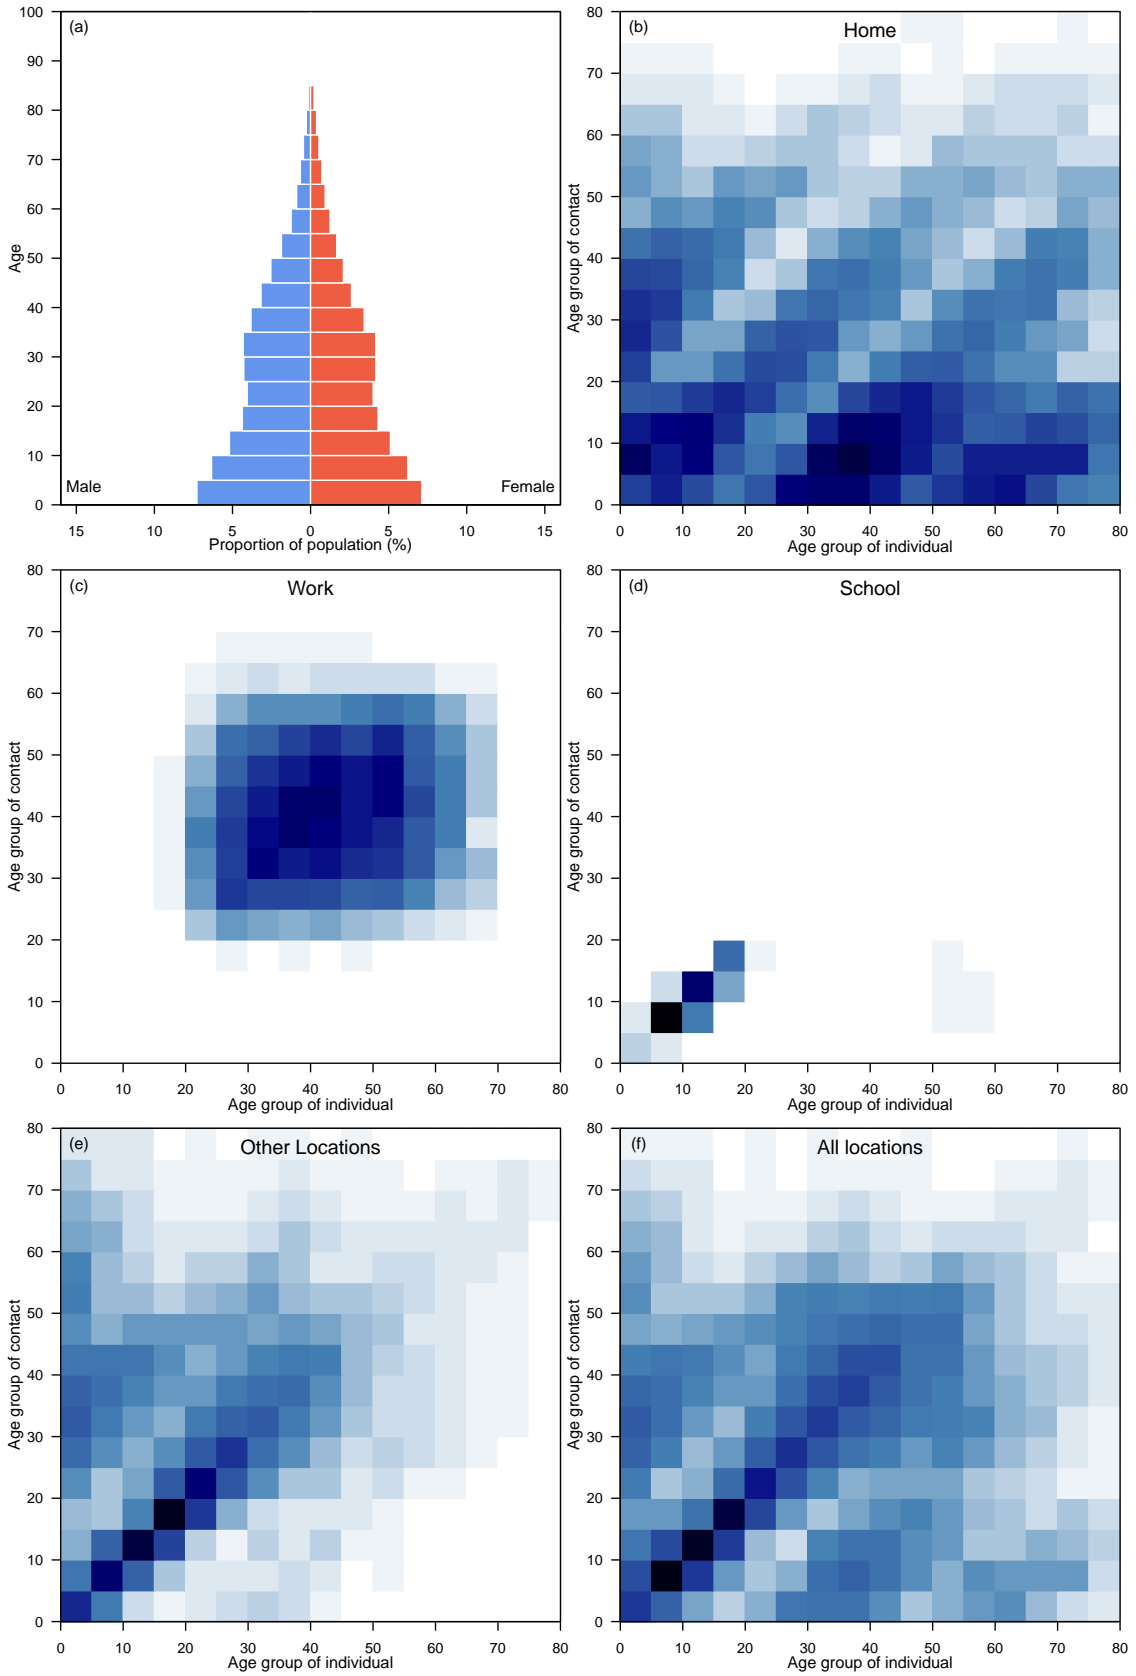

# Gambia

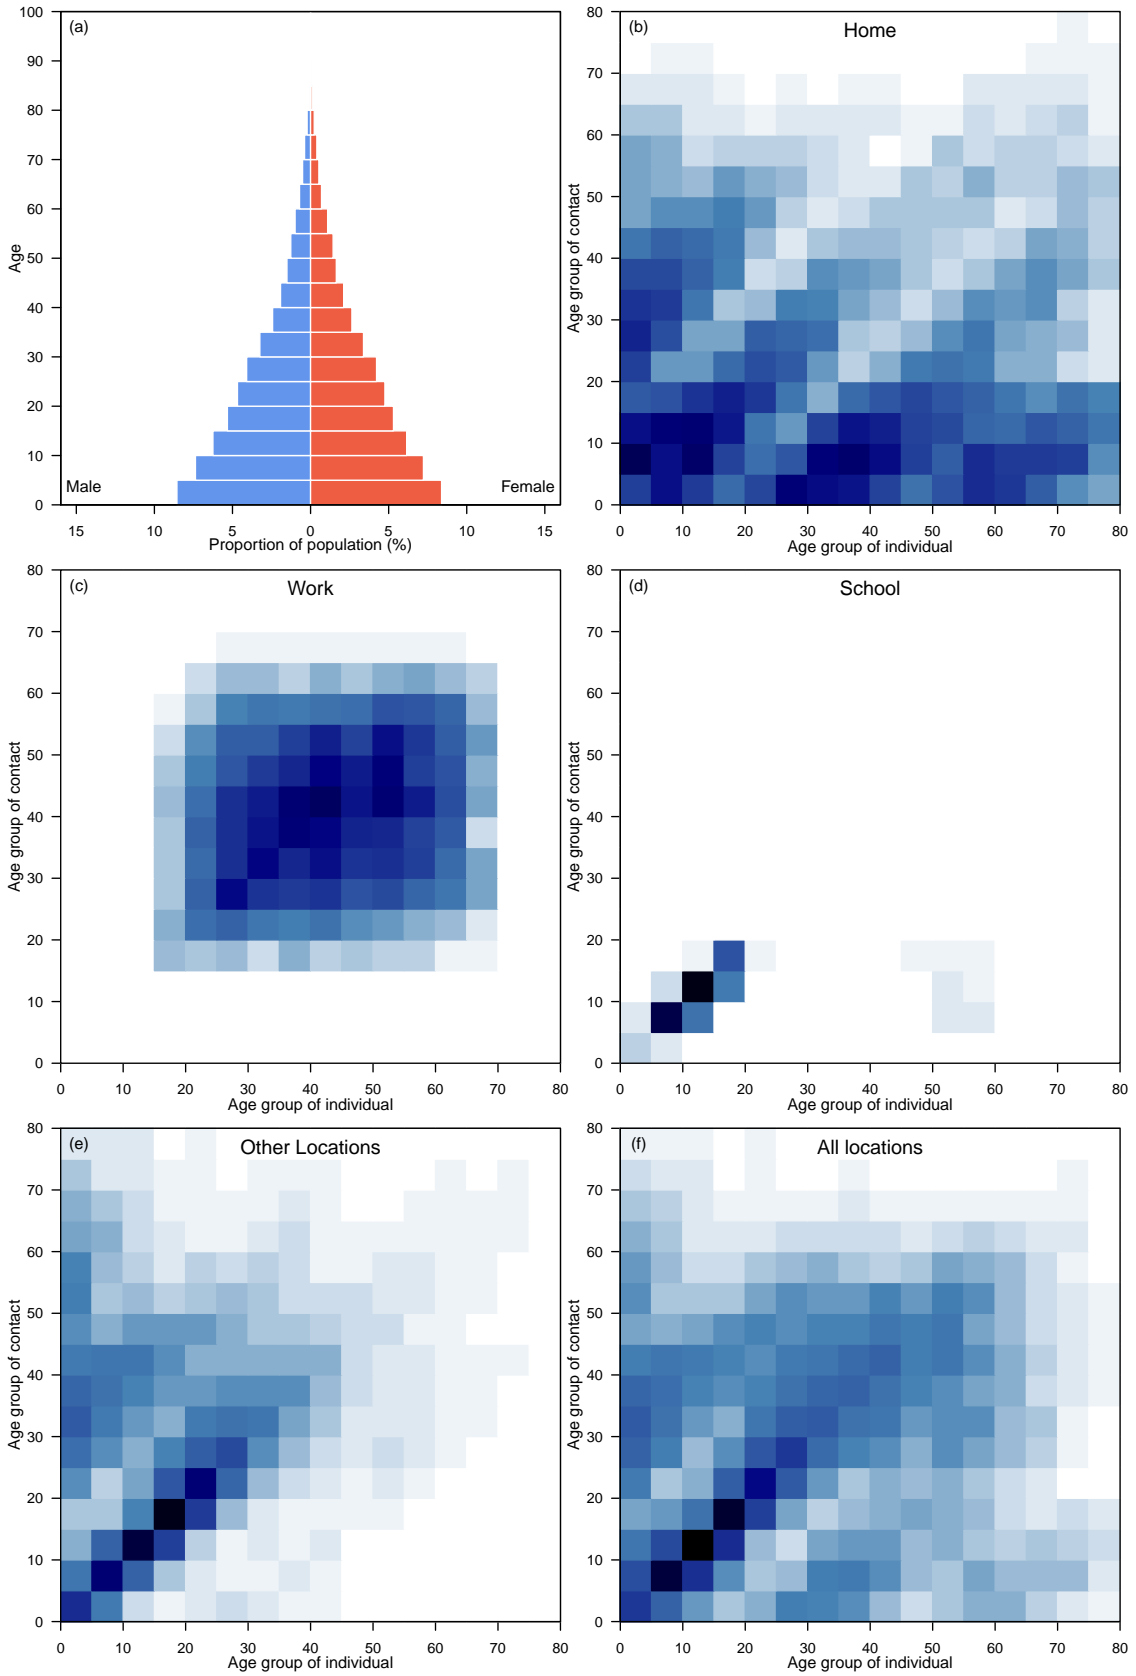

# Georgia

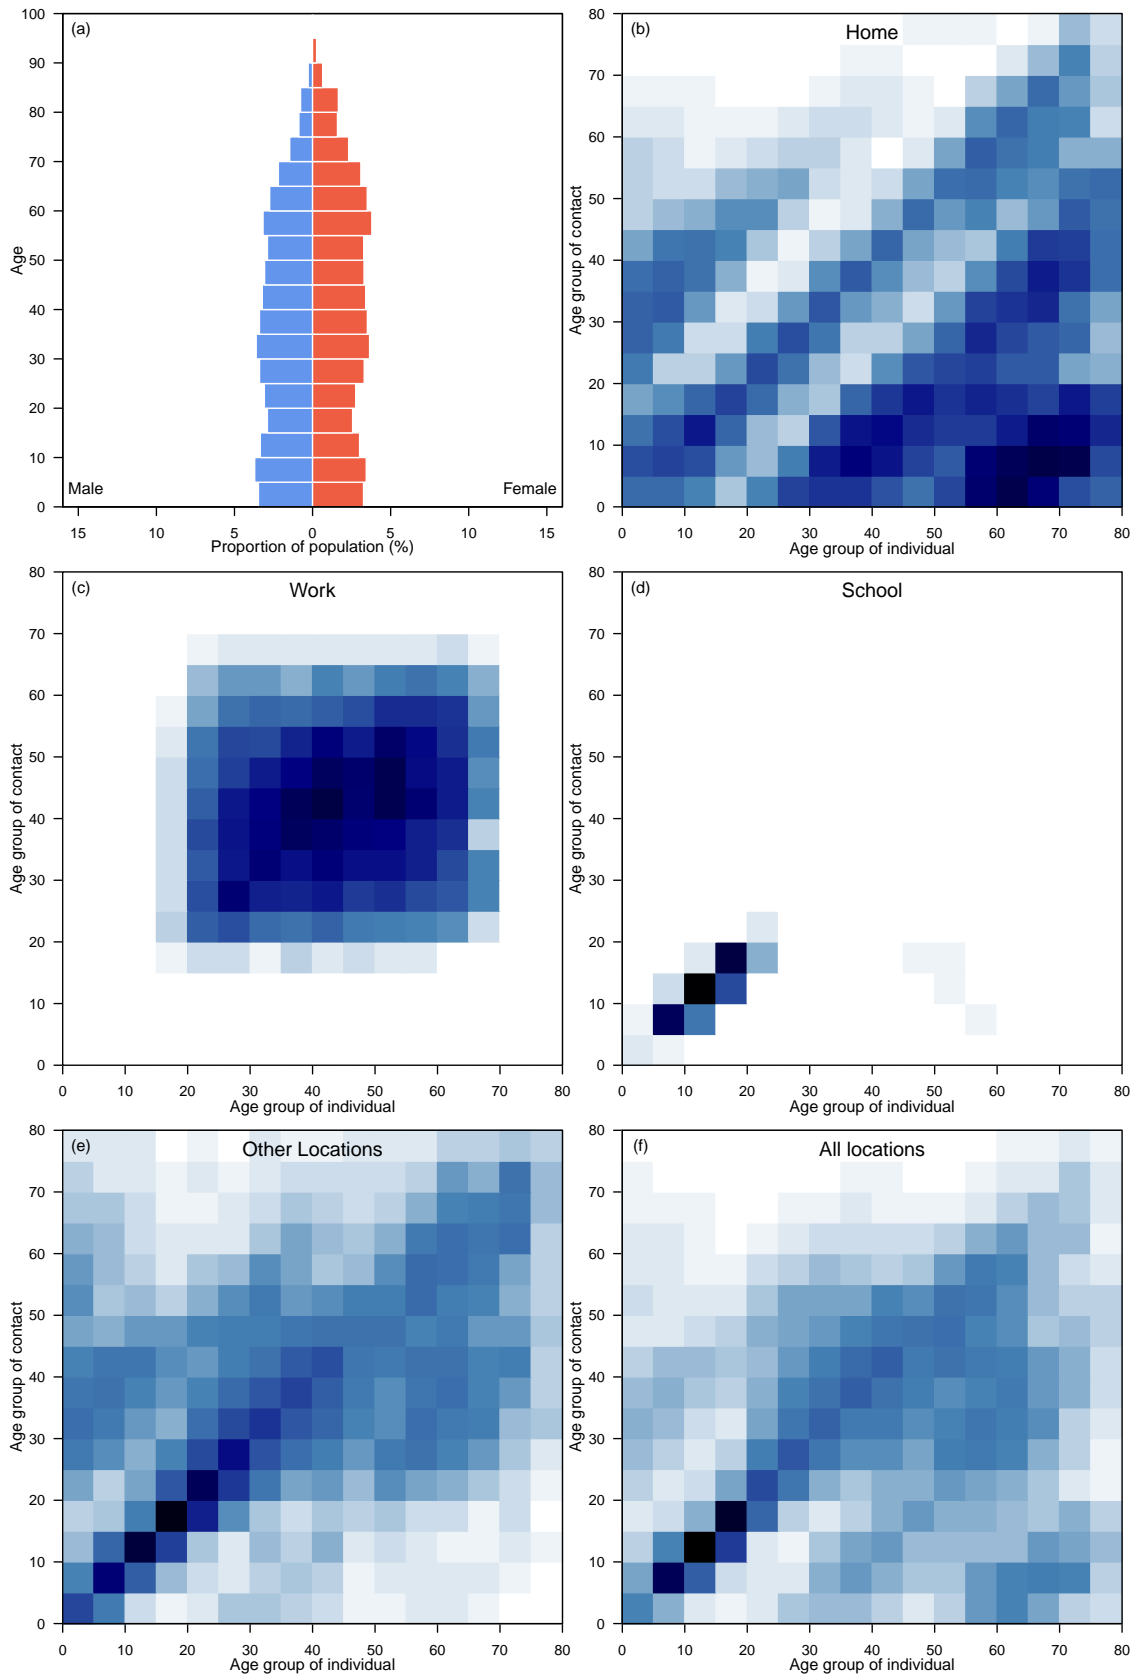

# Germany

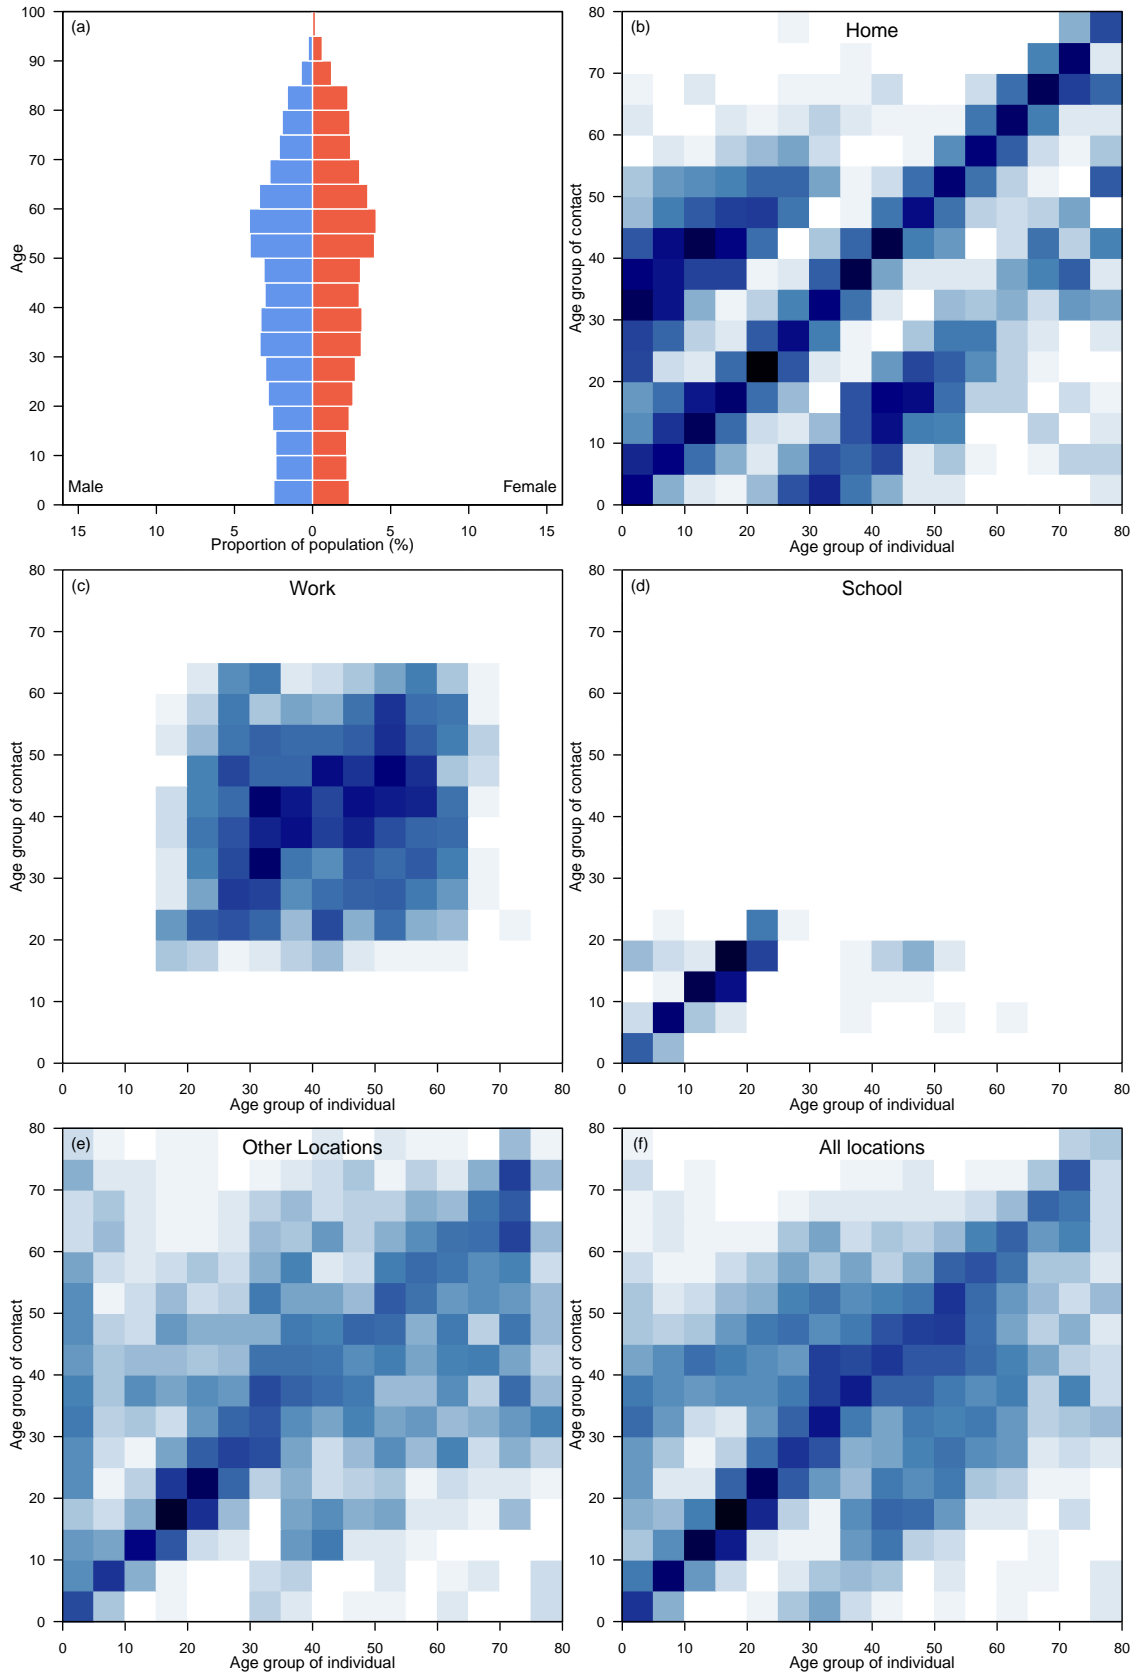

# Ghana

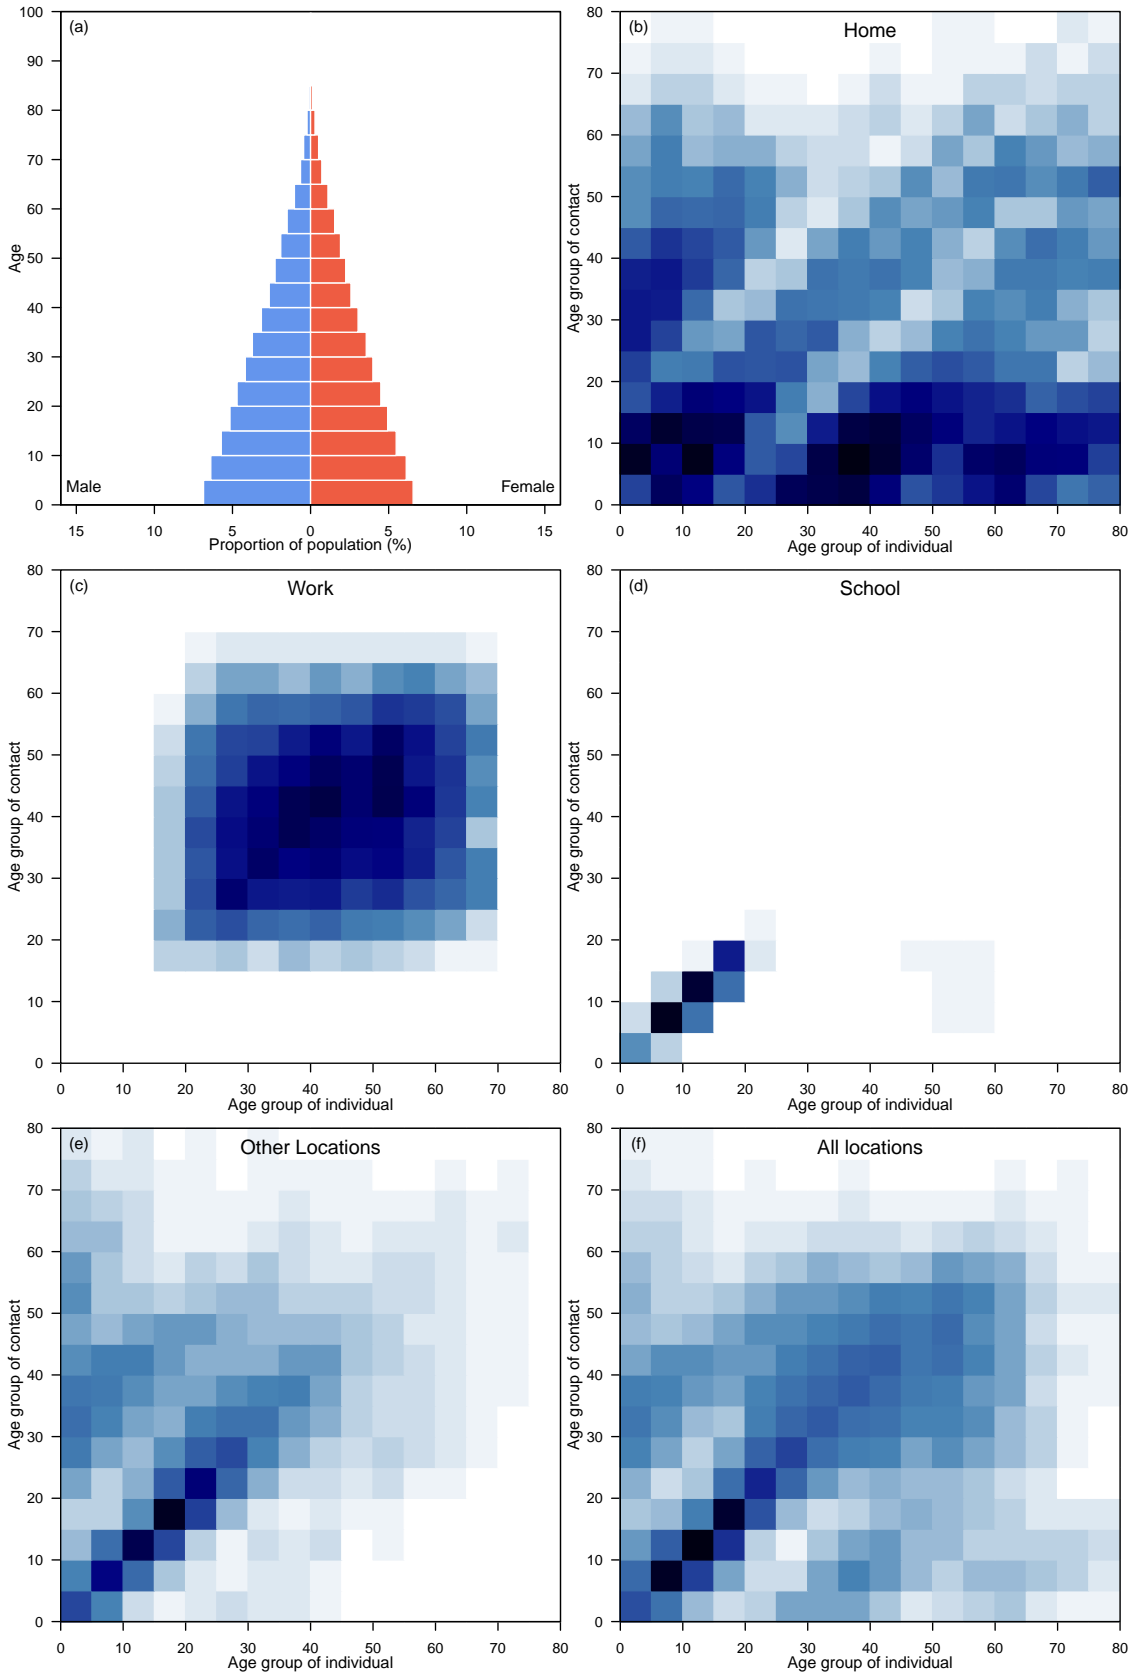



# Greece

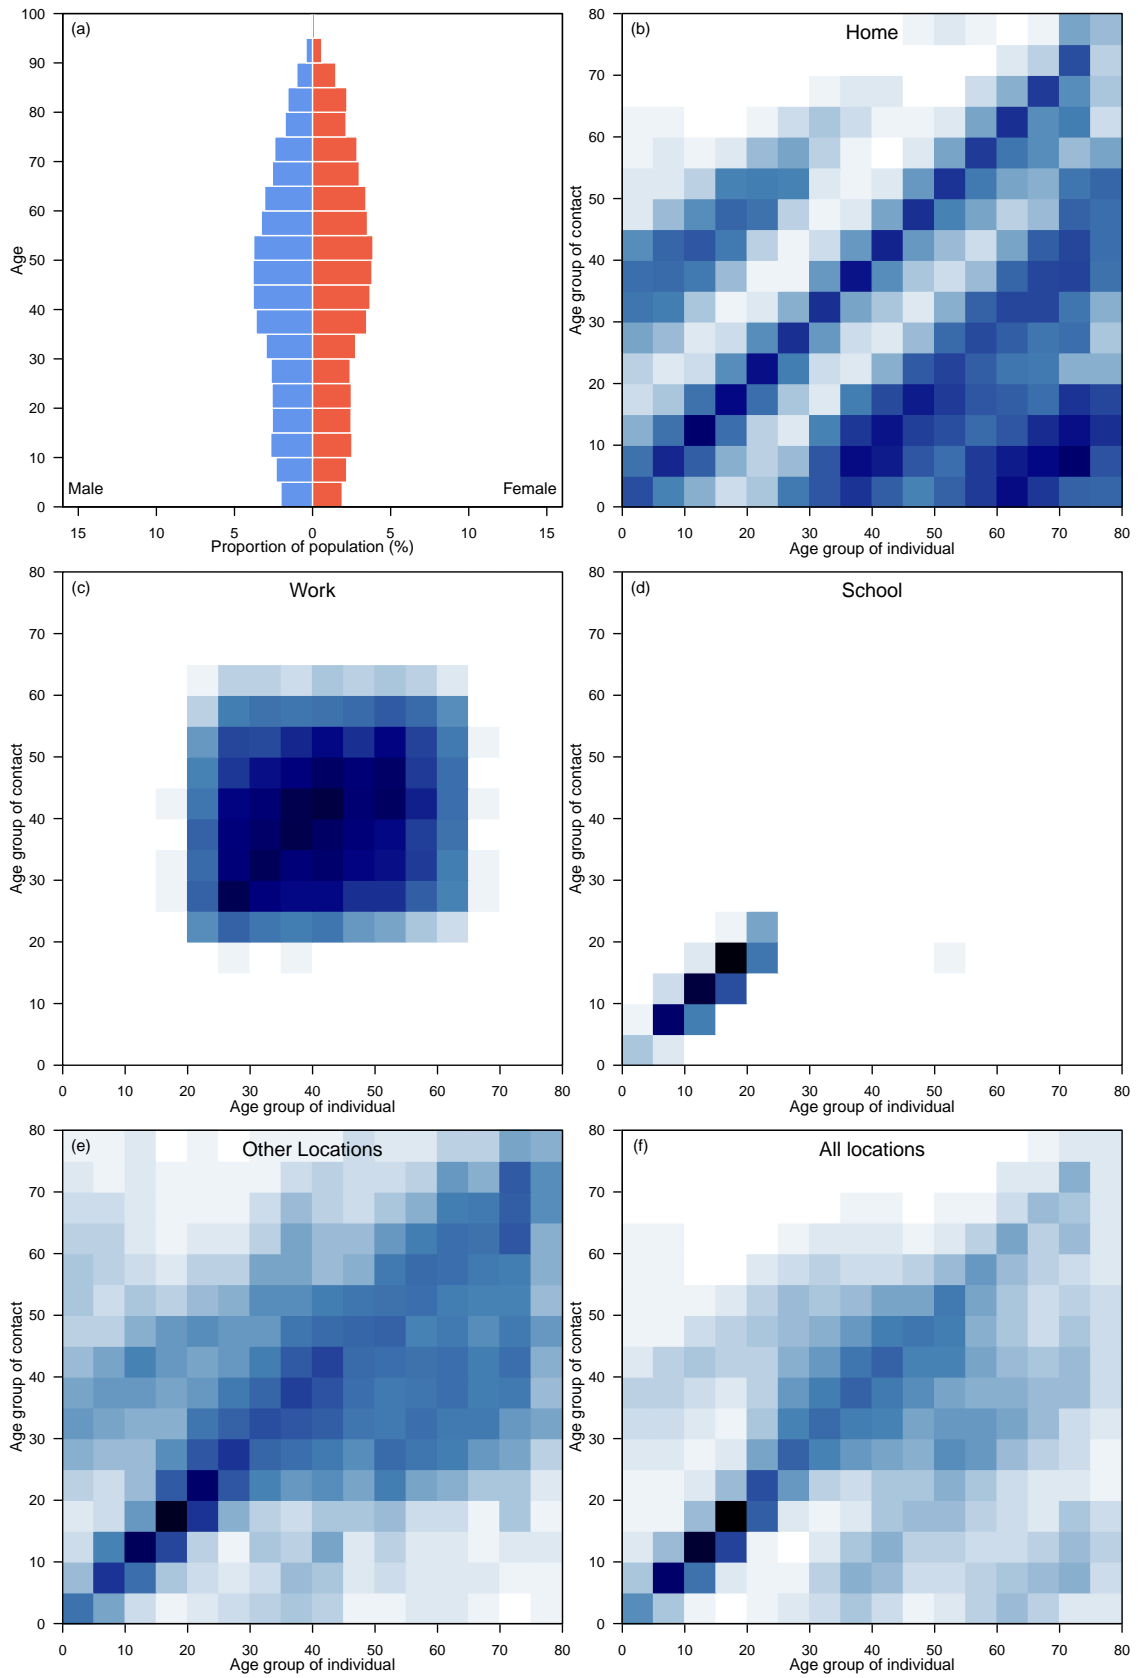

# Guatemala

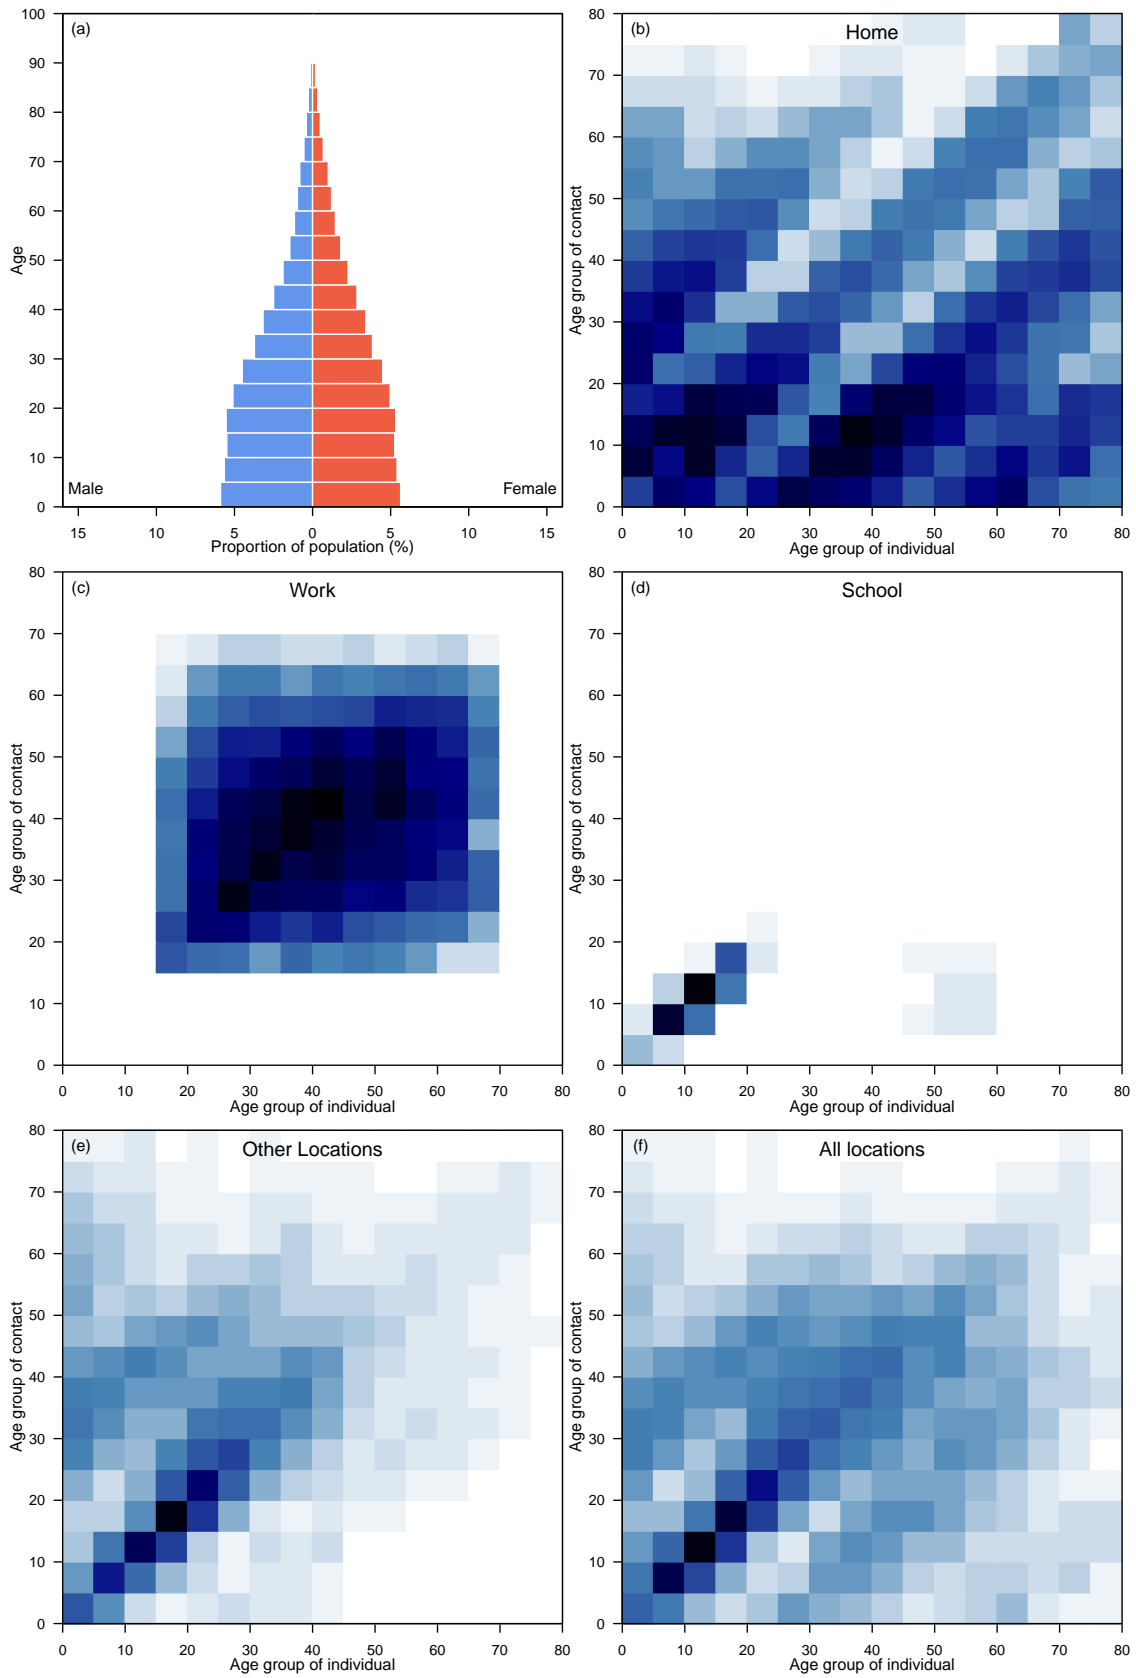

# Guinea

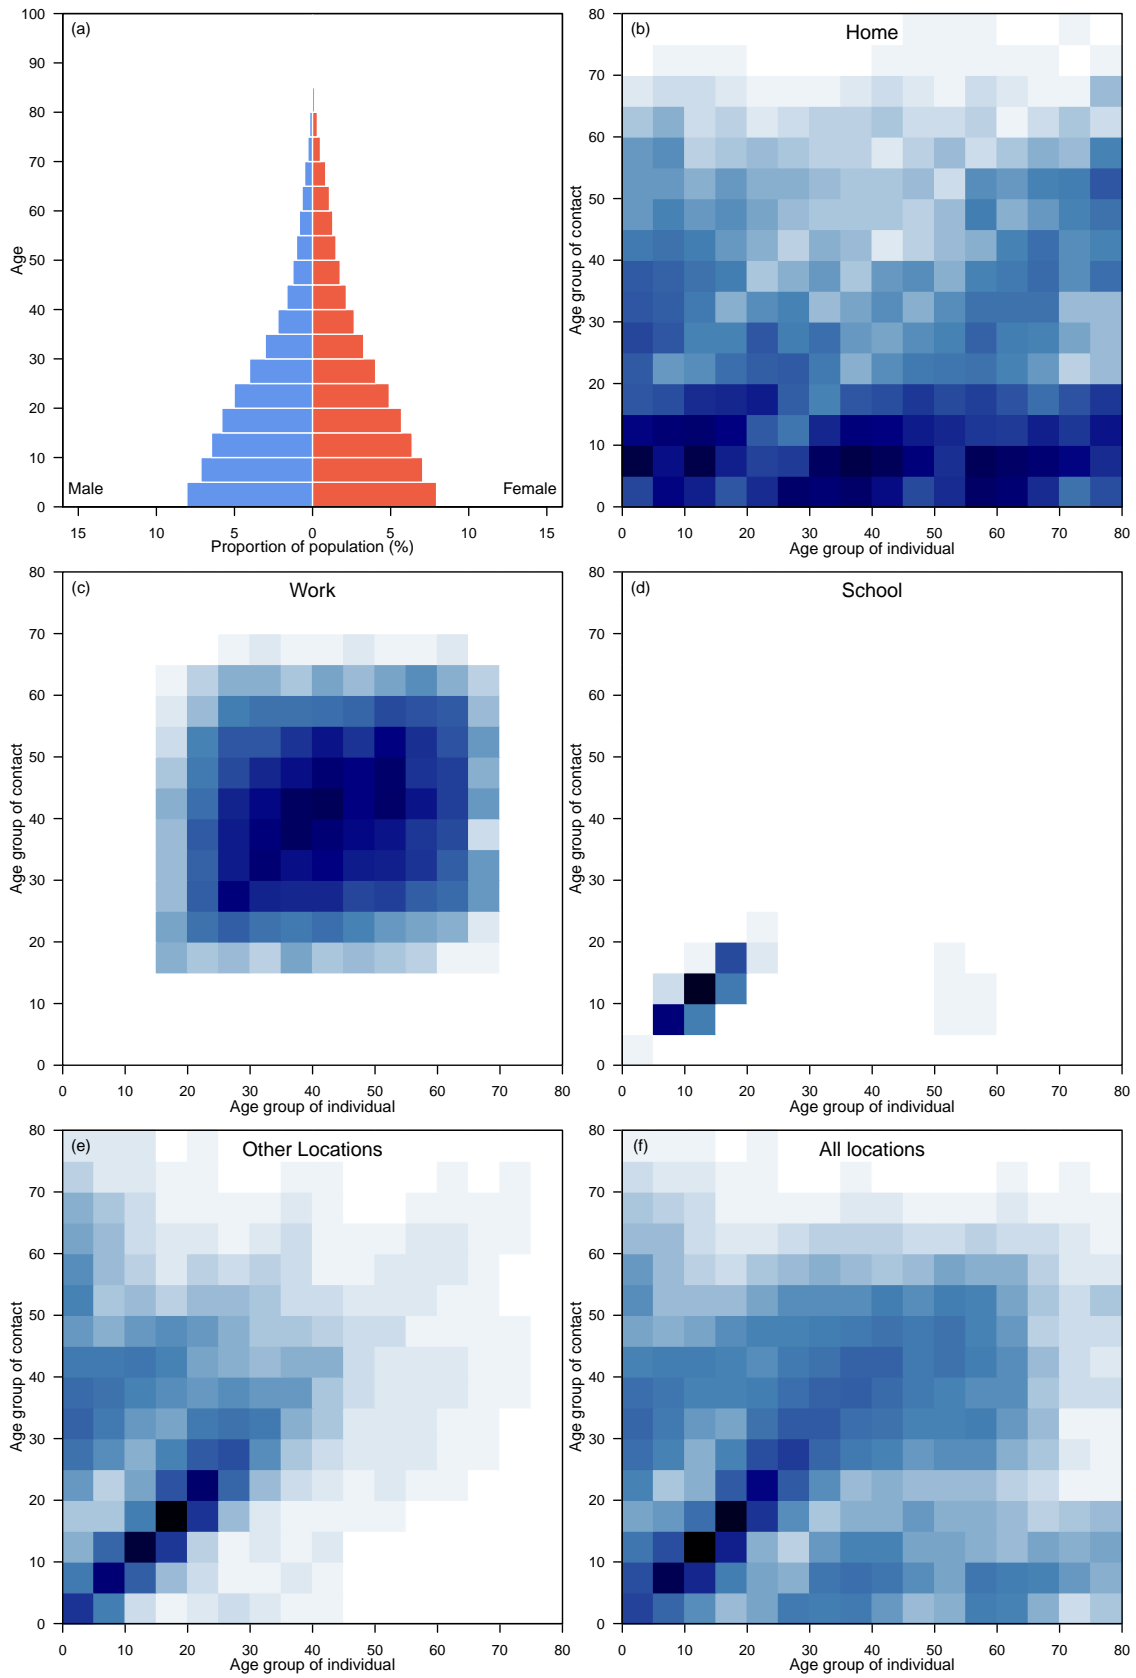

# Guinea-Bissau

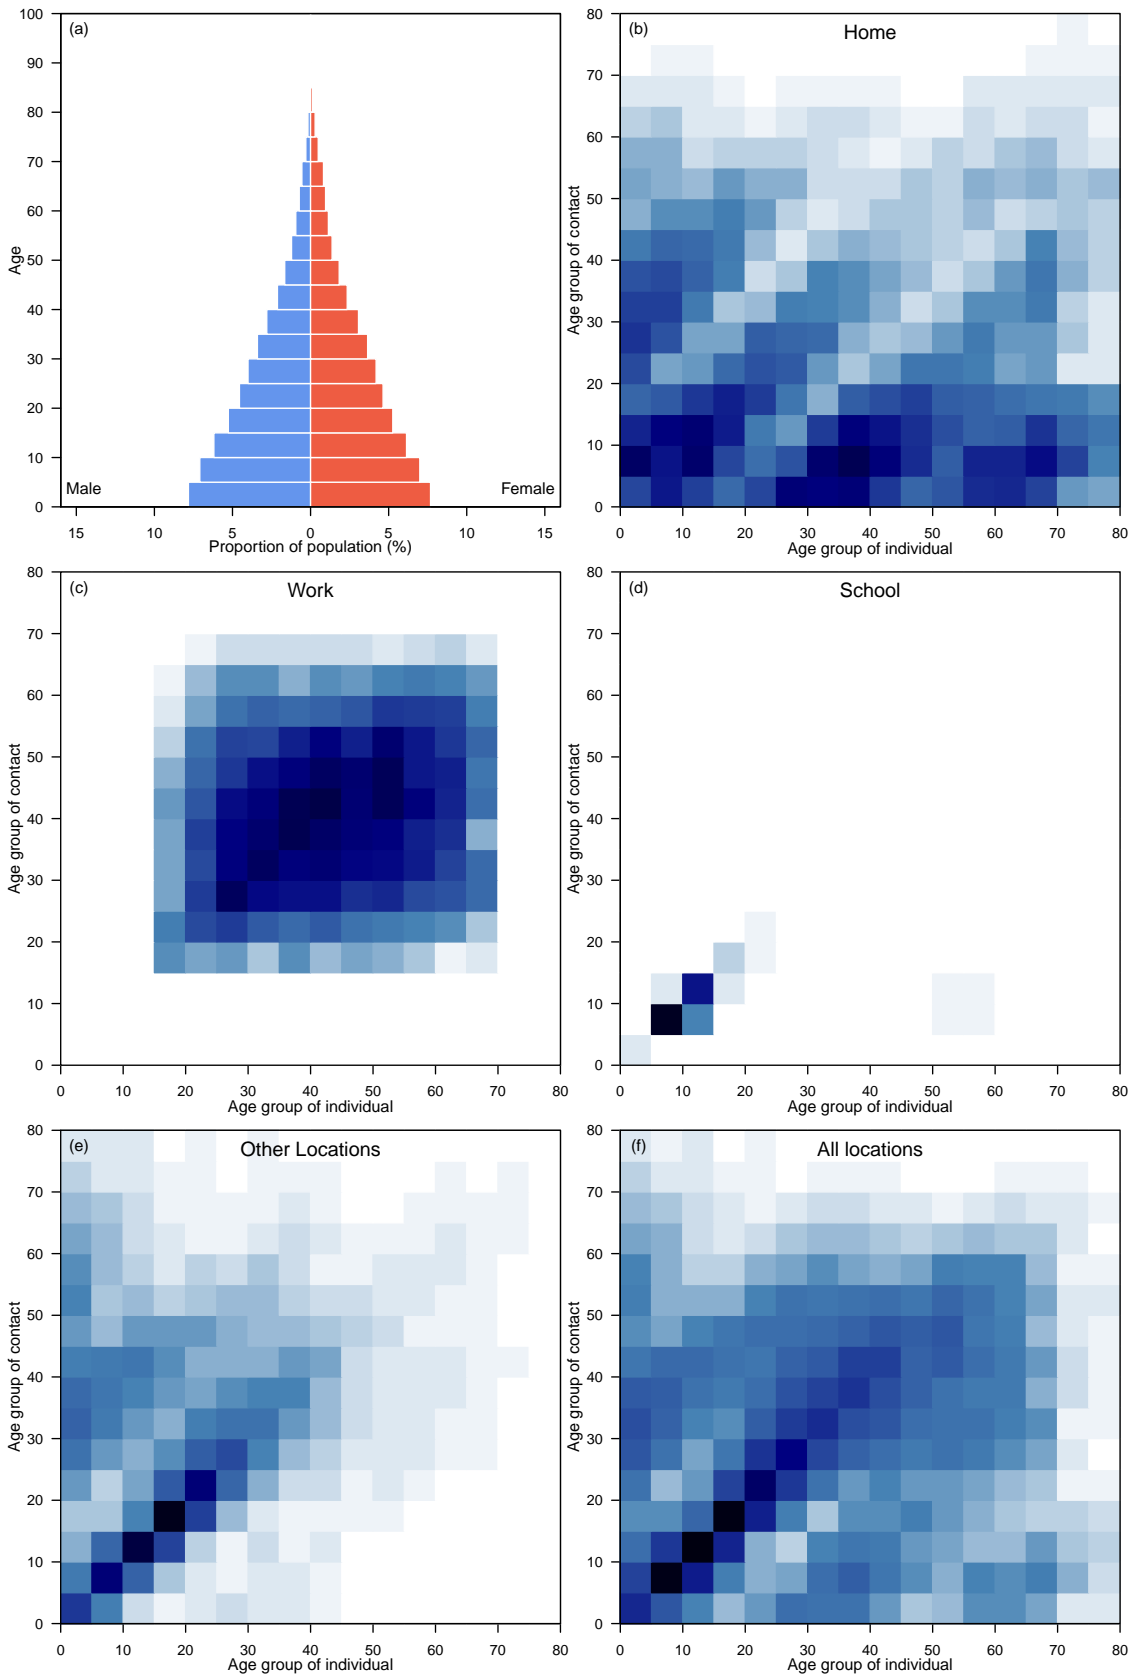

# Guyana

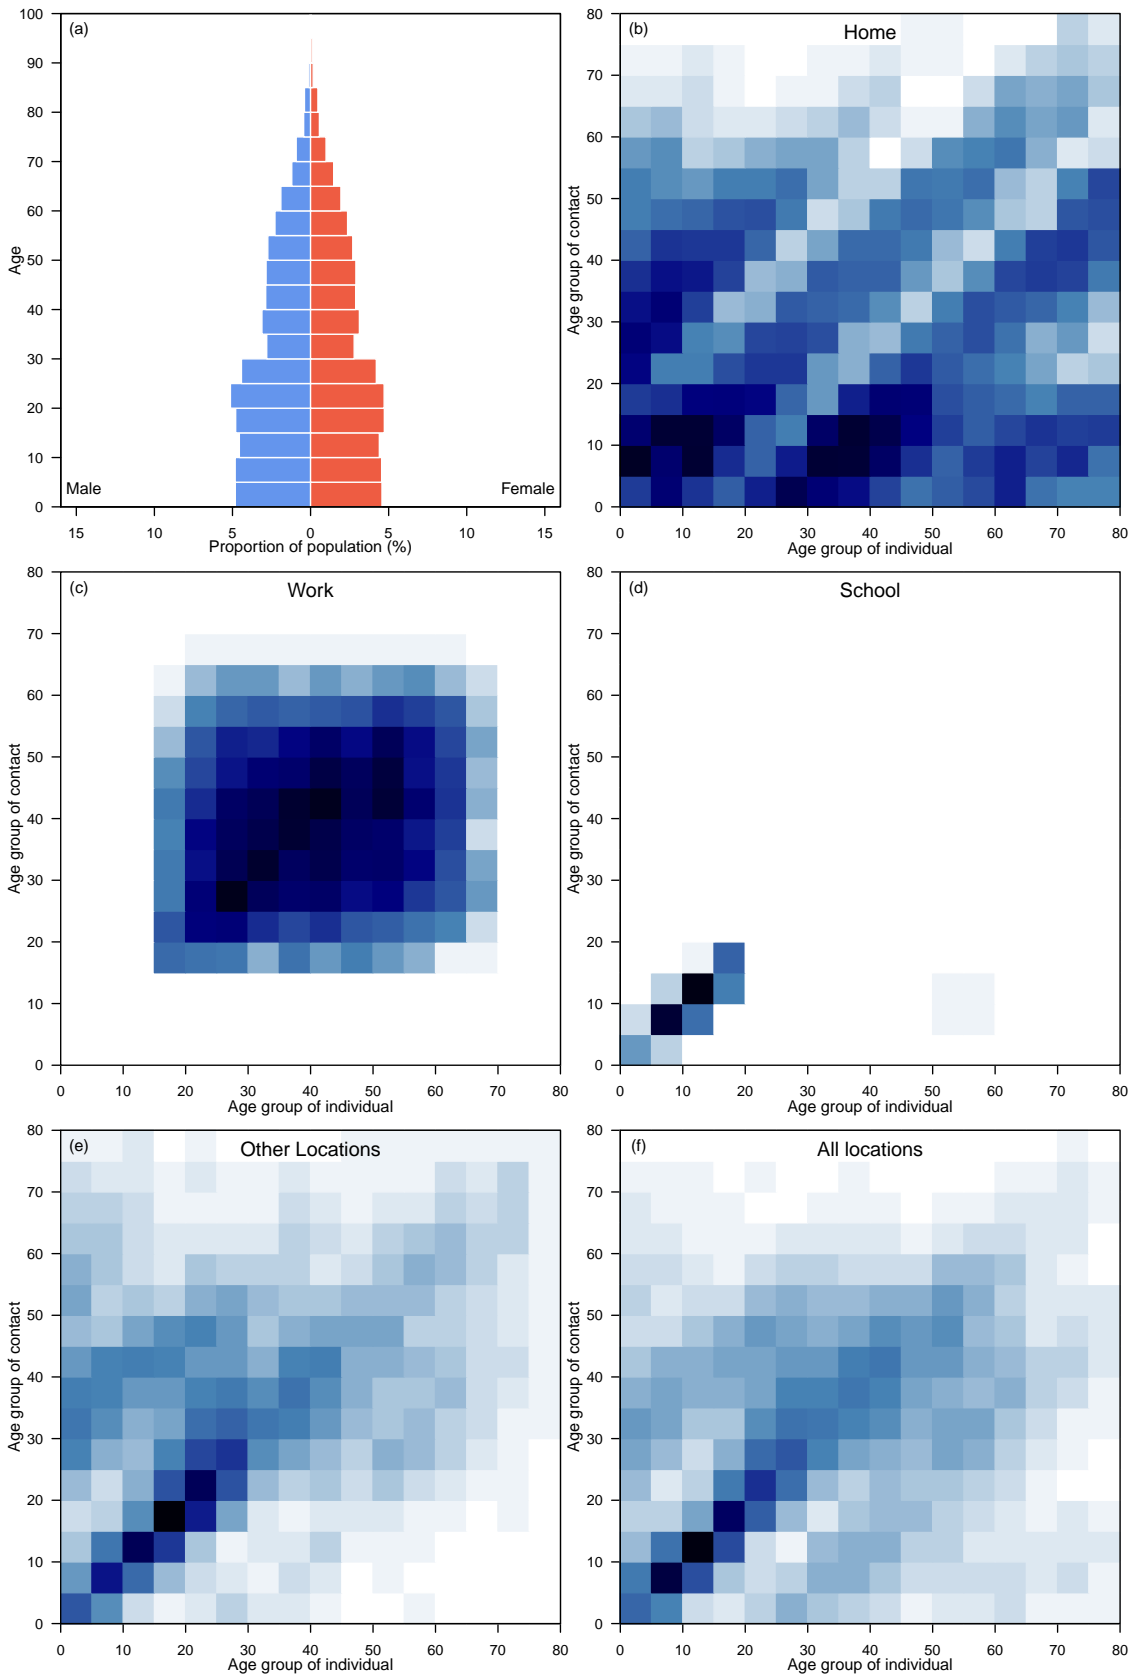

# Honduras

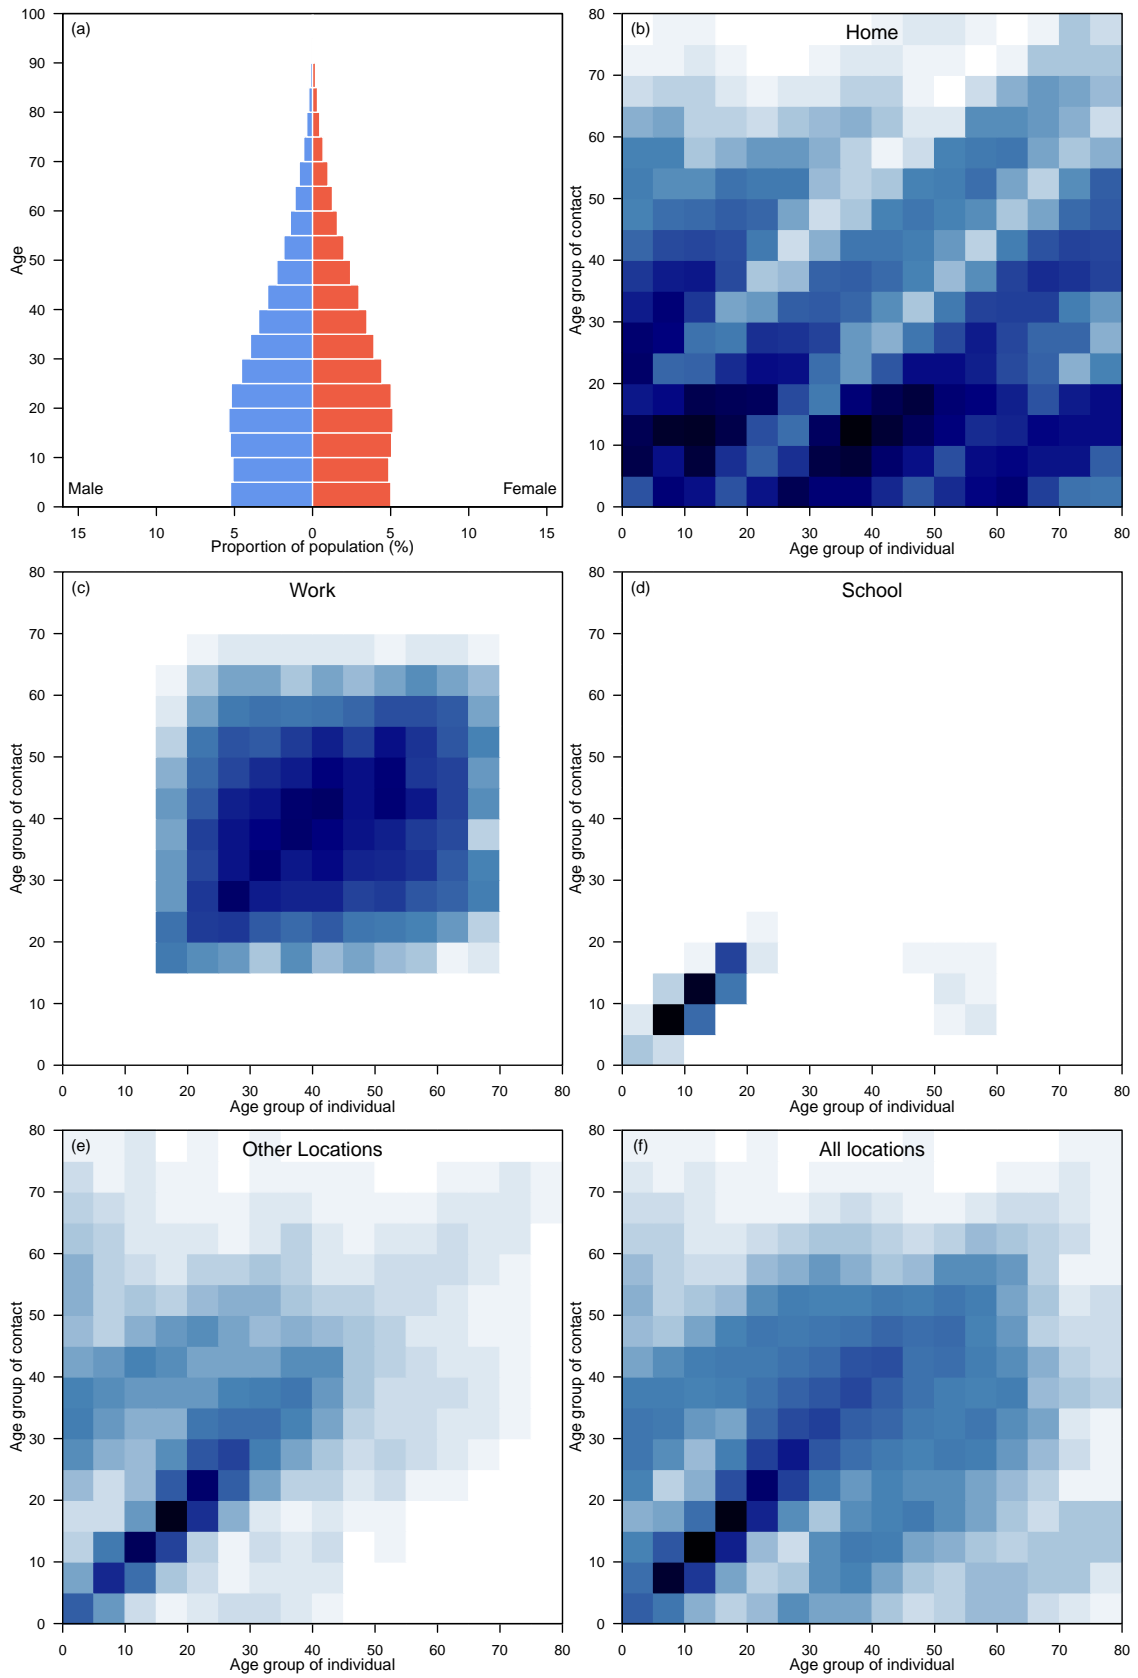

# Hungary

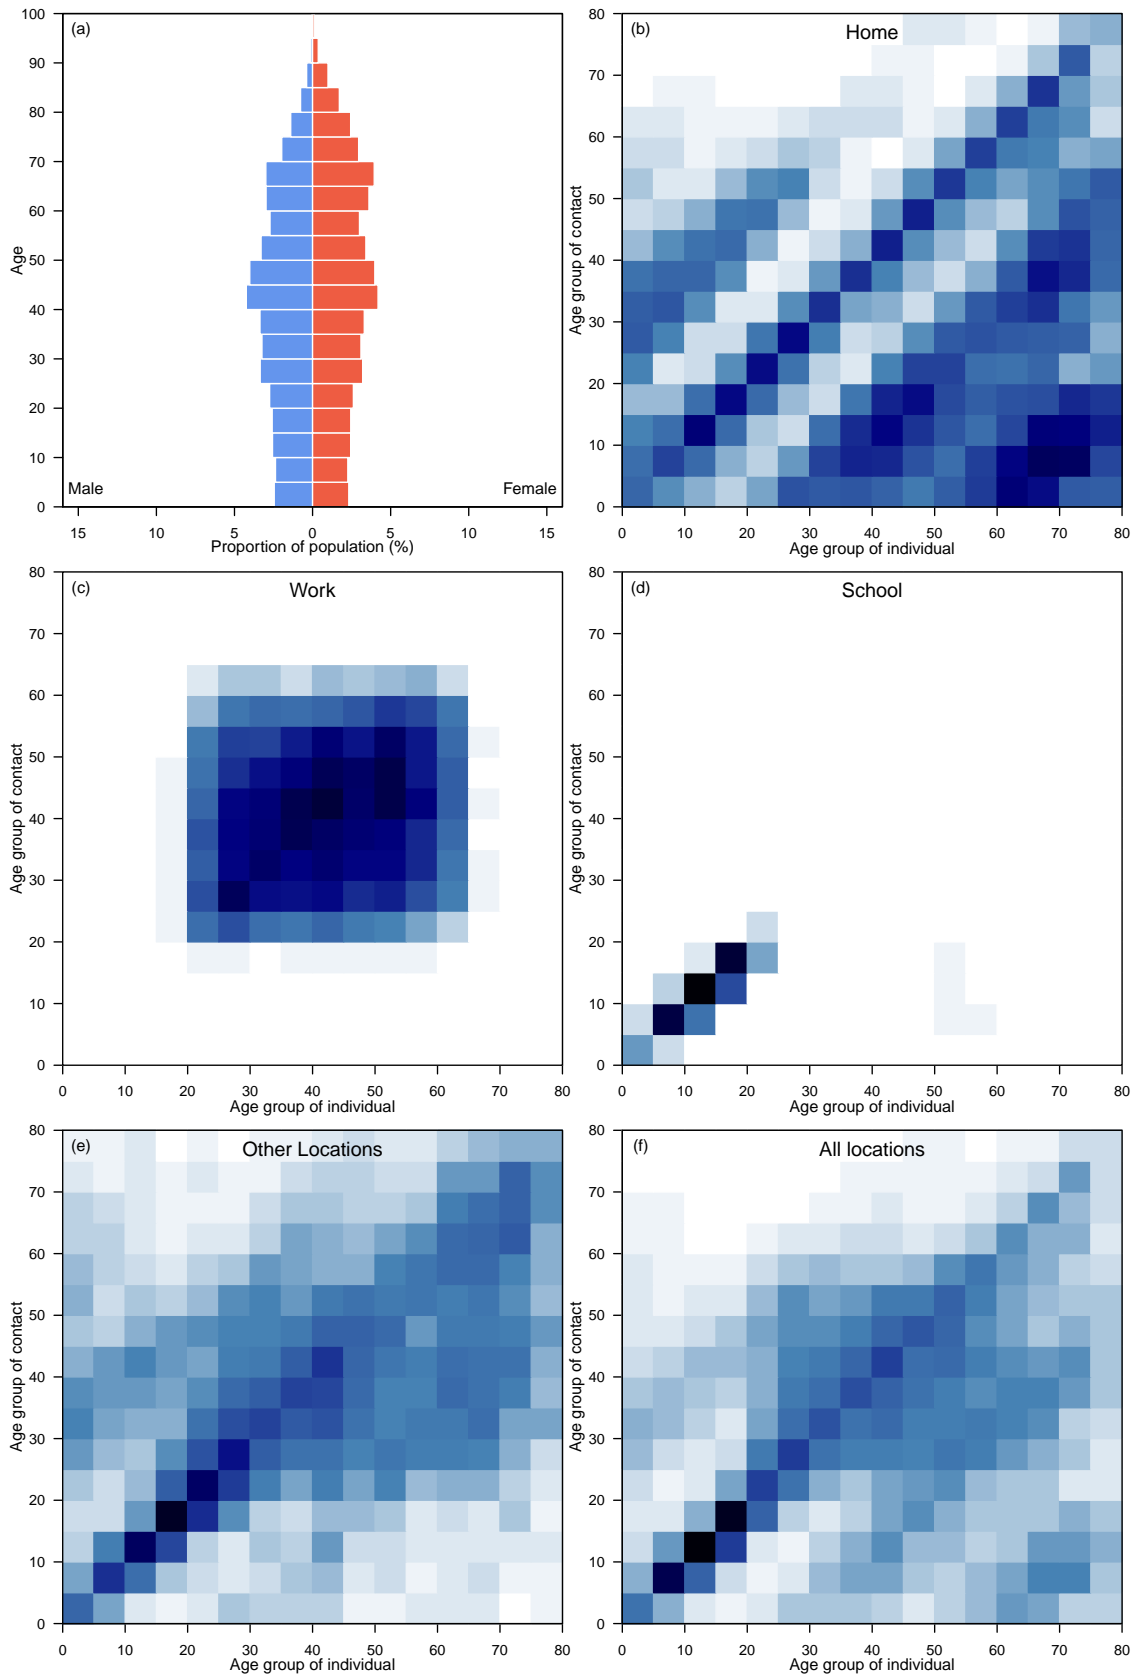

# Iceland

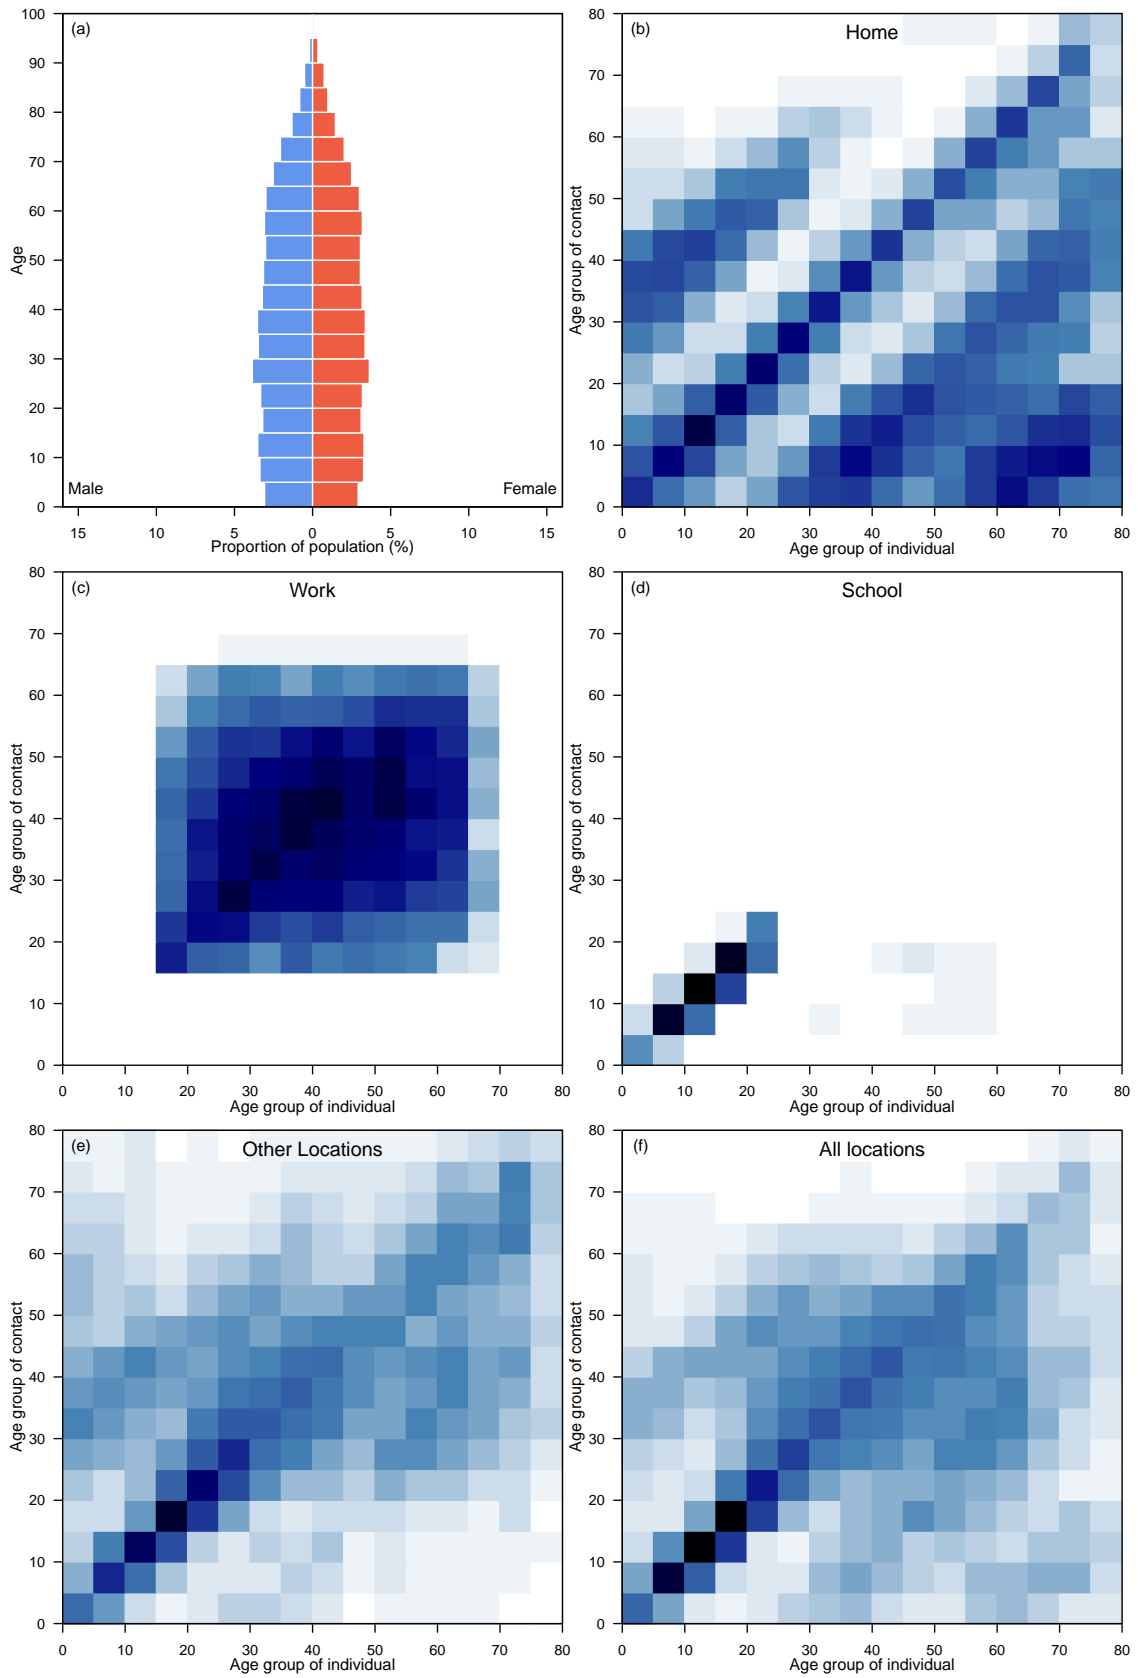



# India

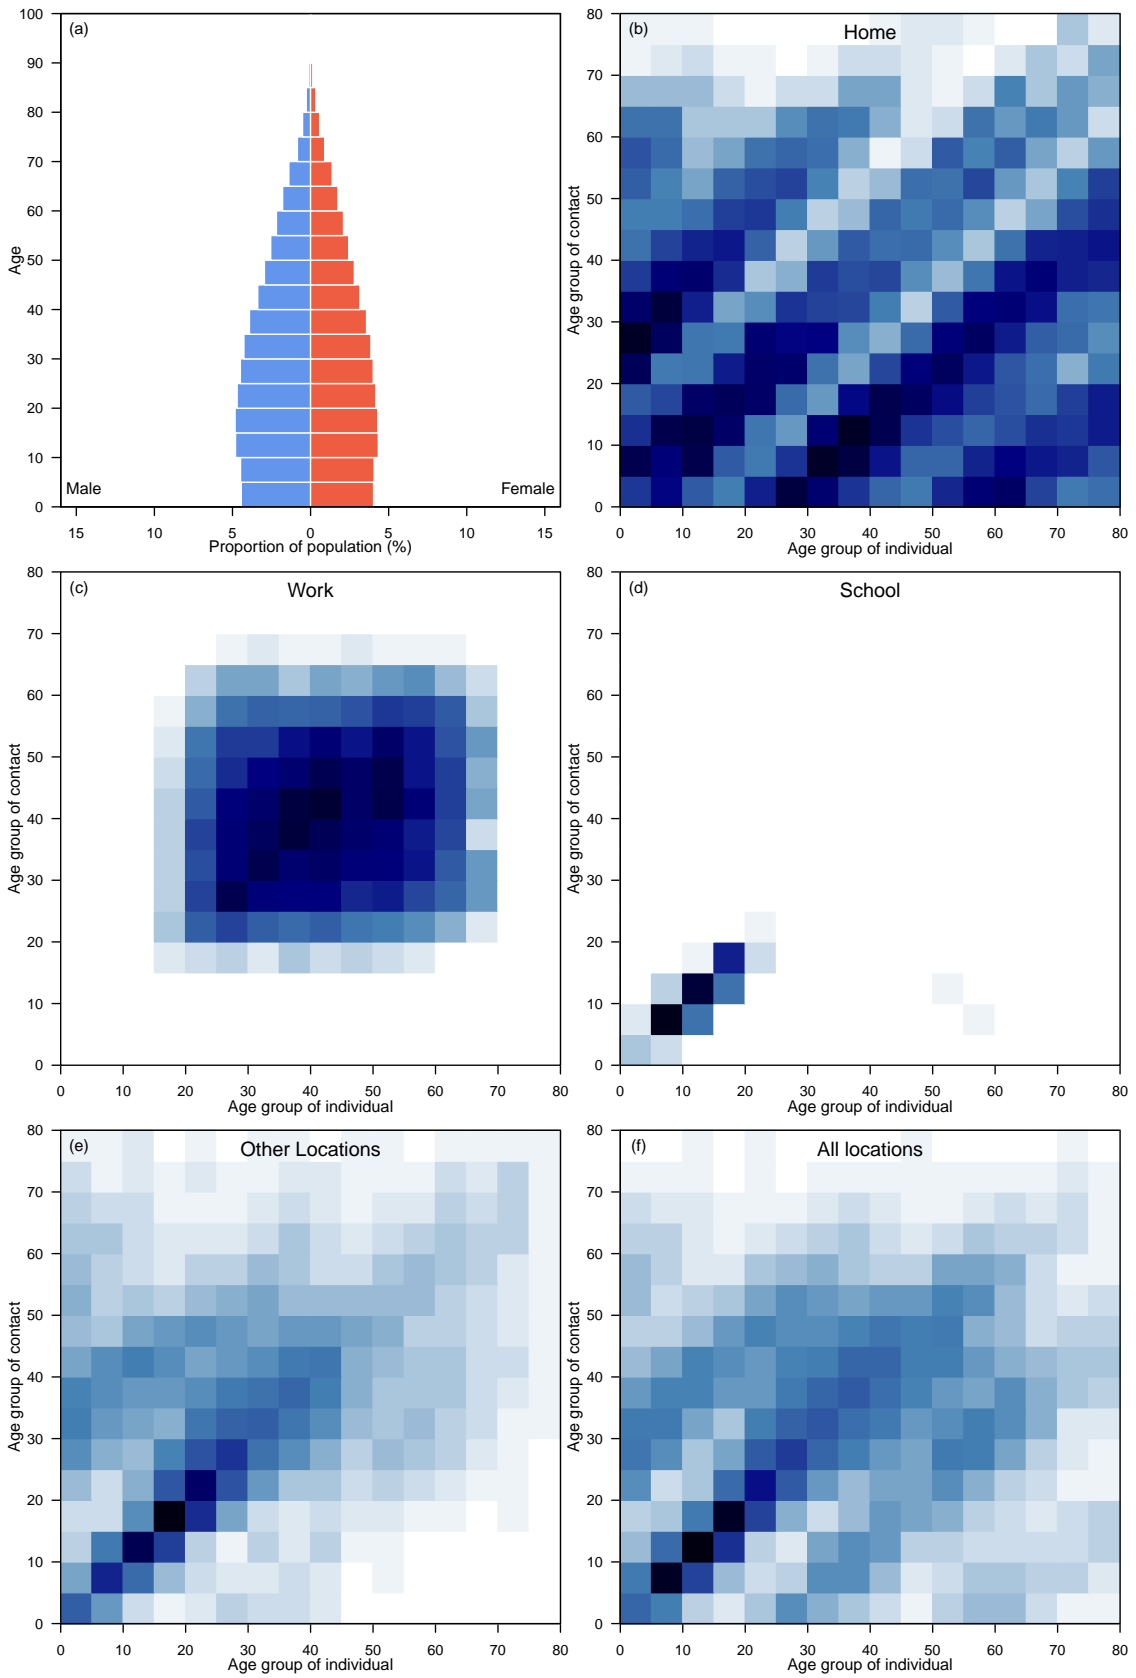

# Indonesia

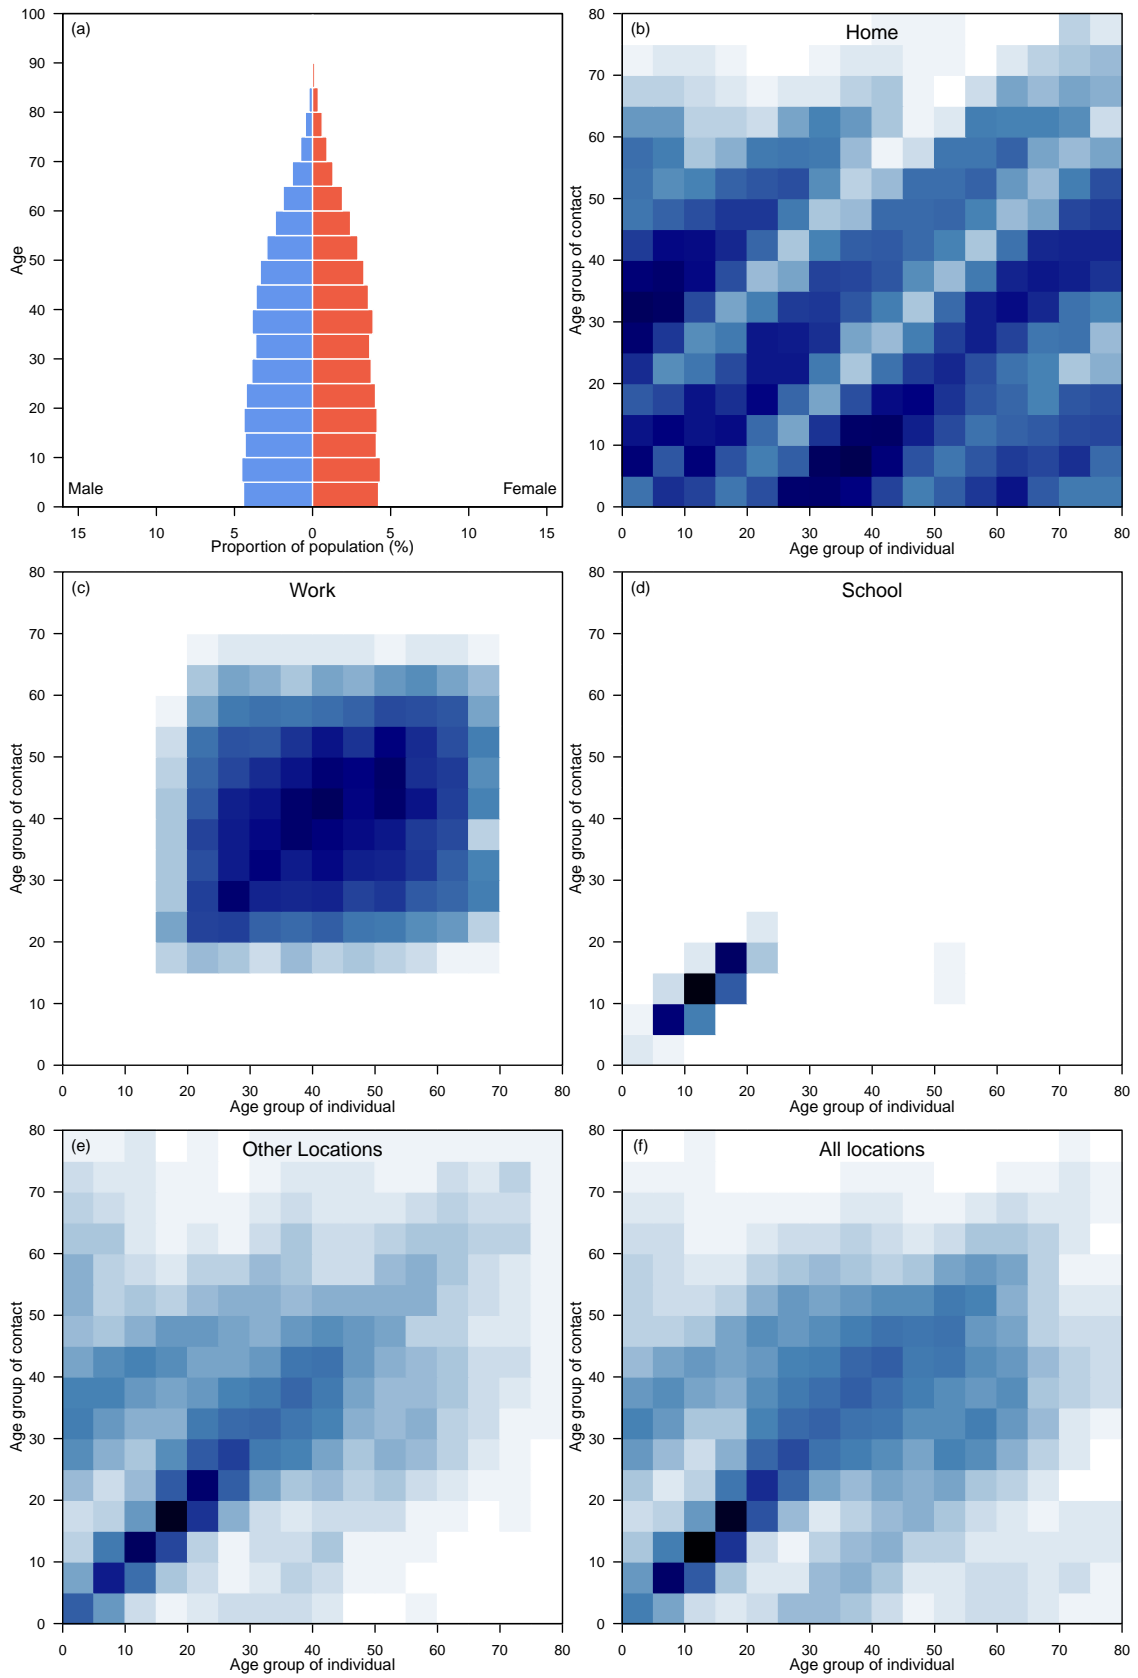

# Iran (Islamic Republic of)

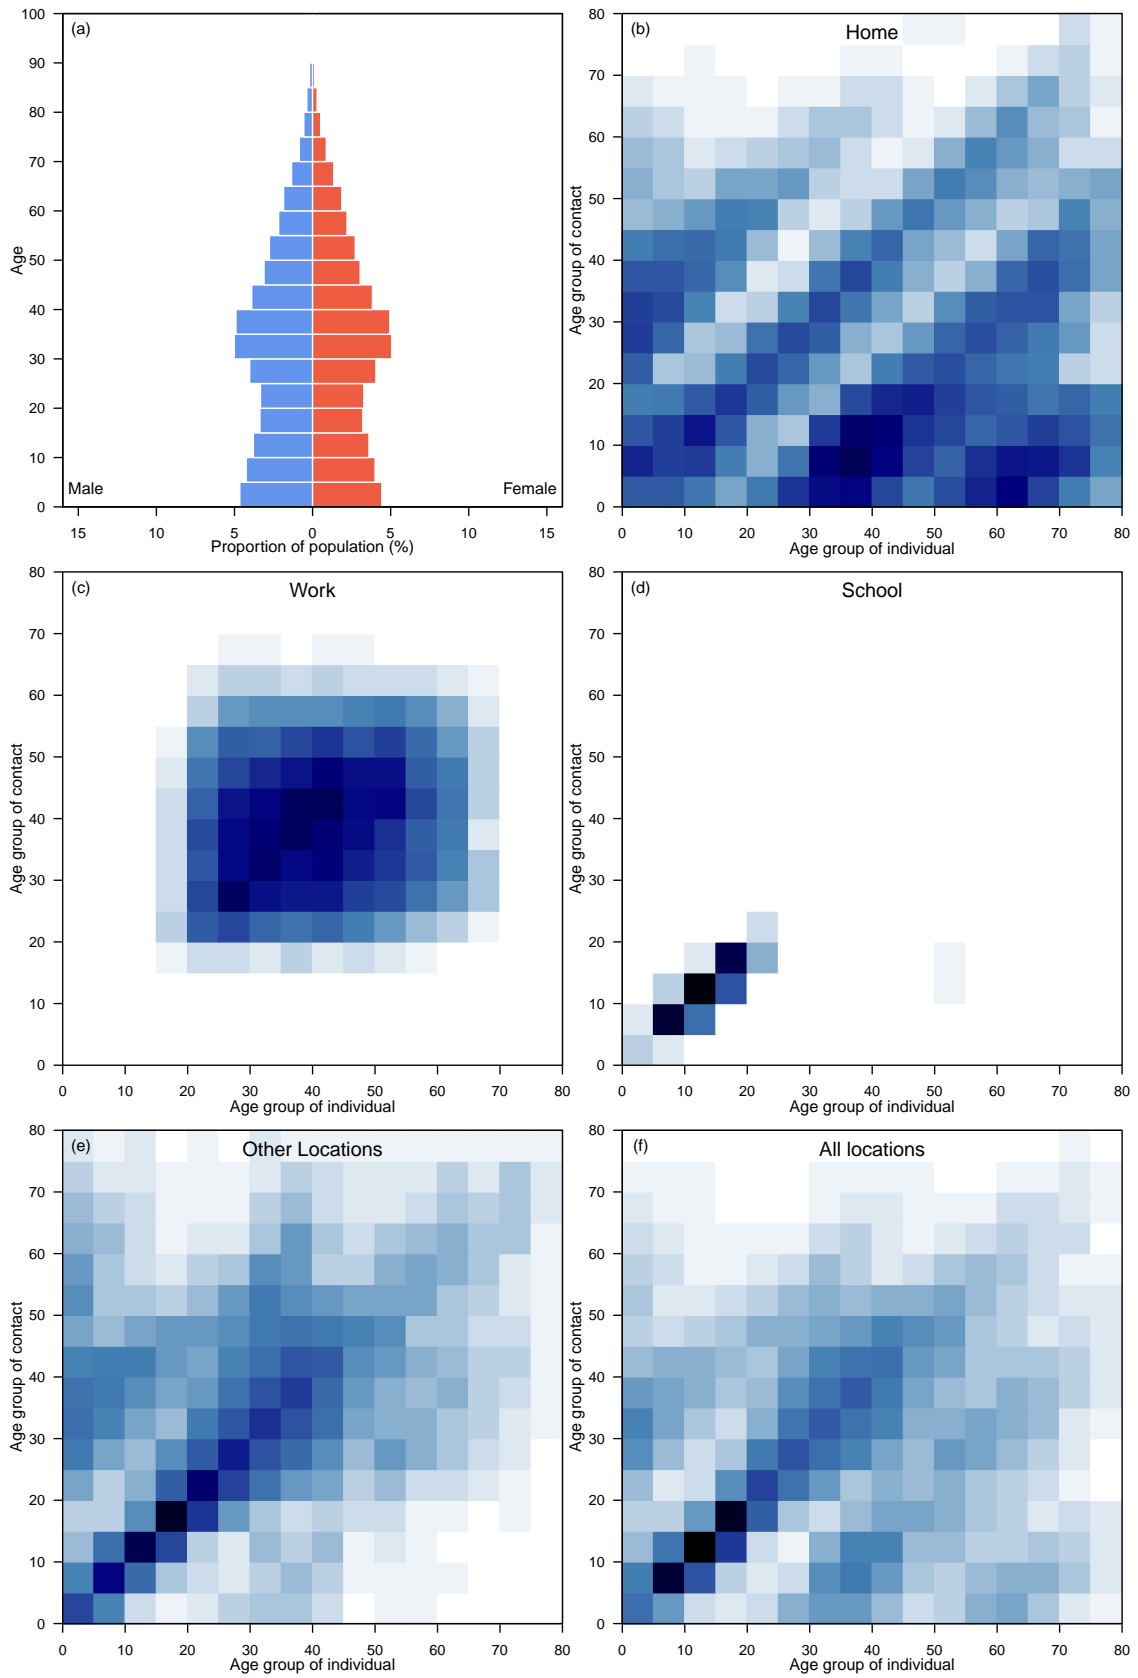

# Iraq

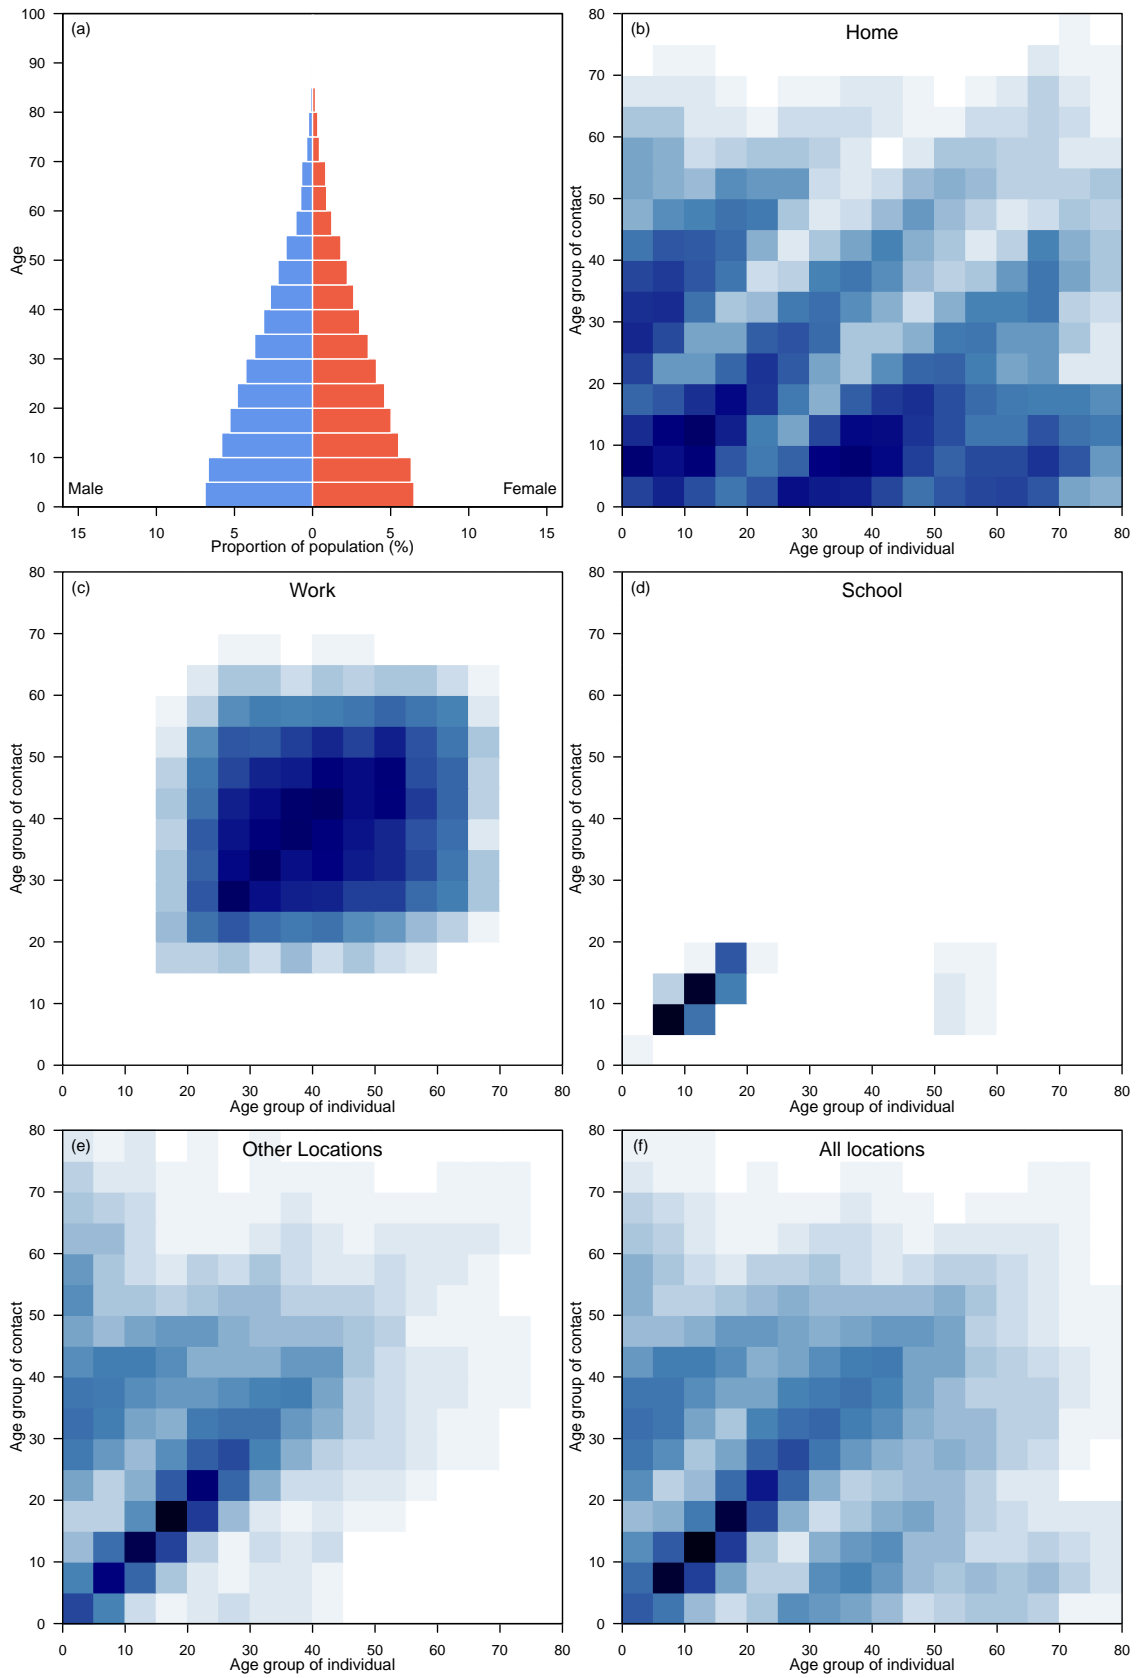

# Ireland

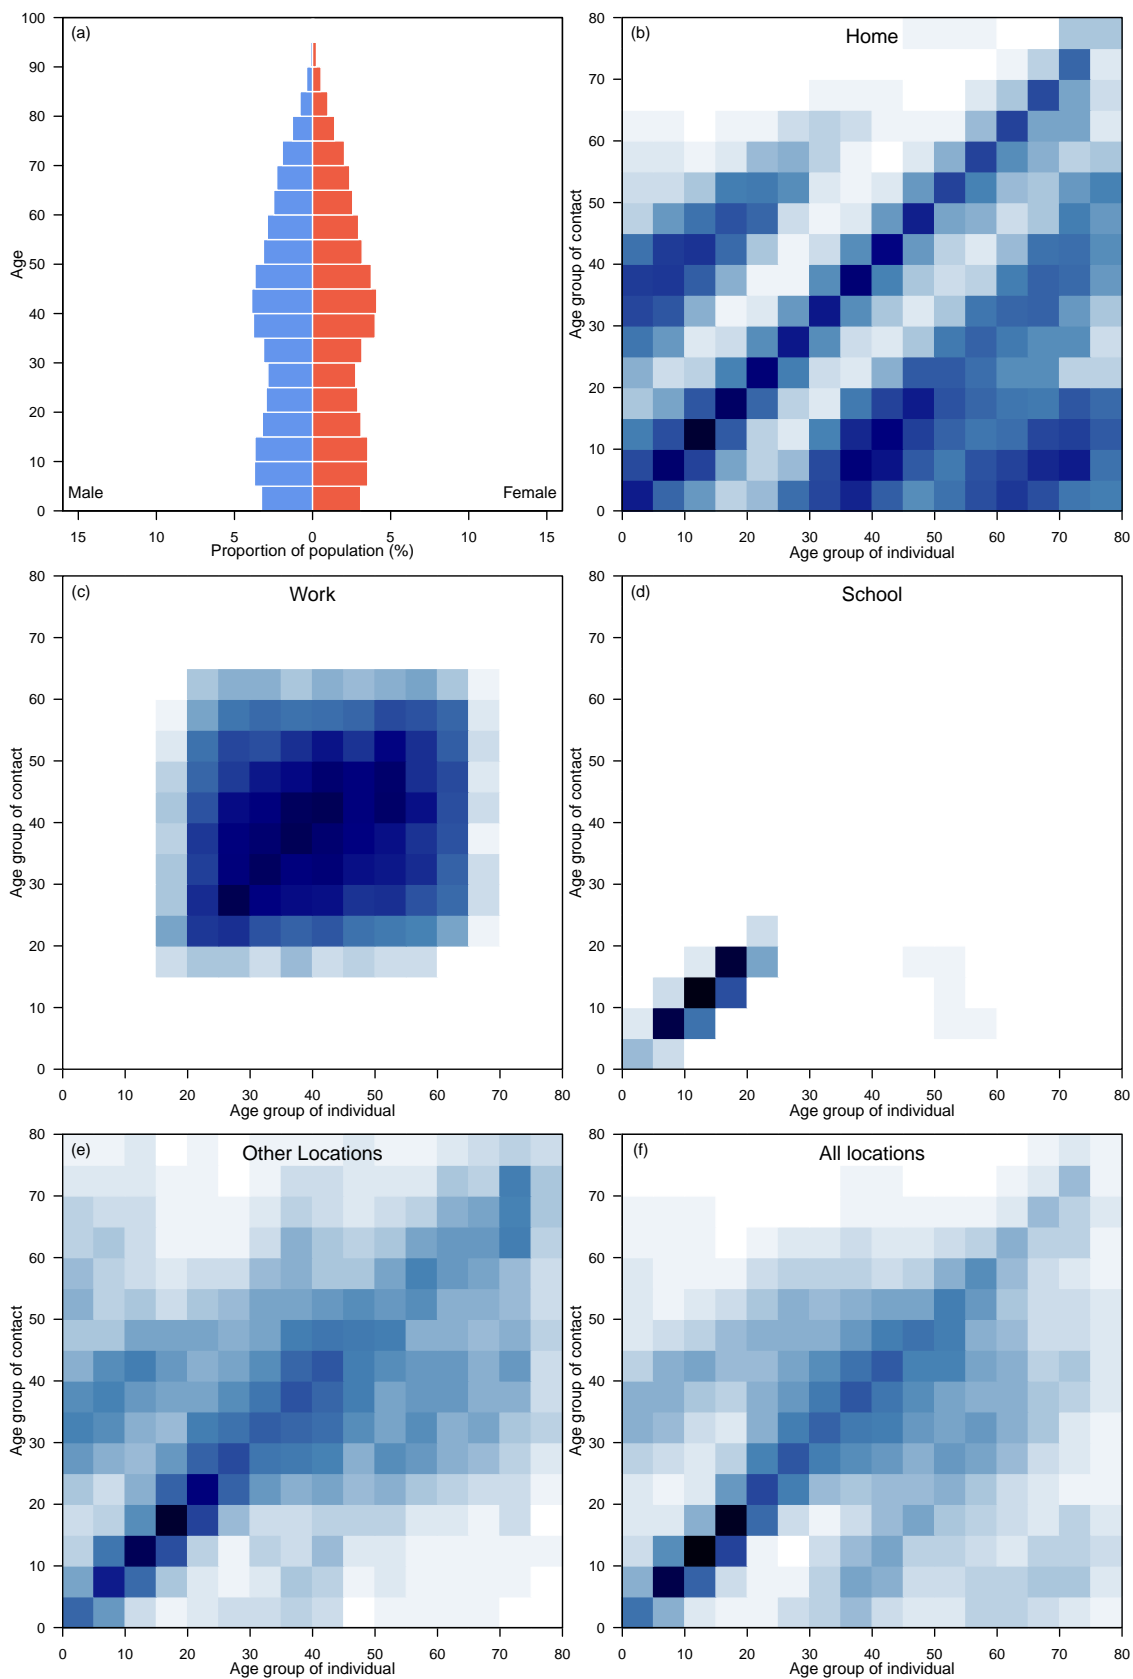

# Israel

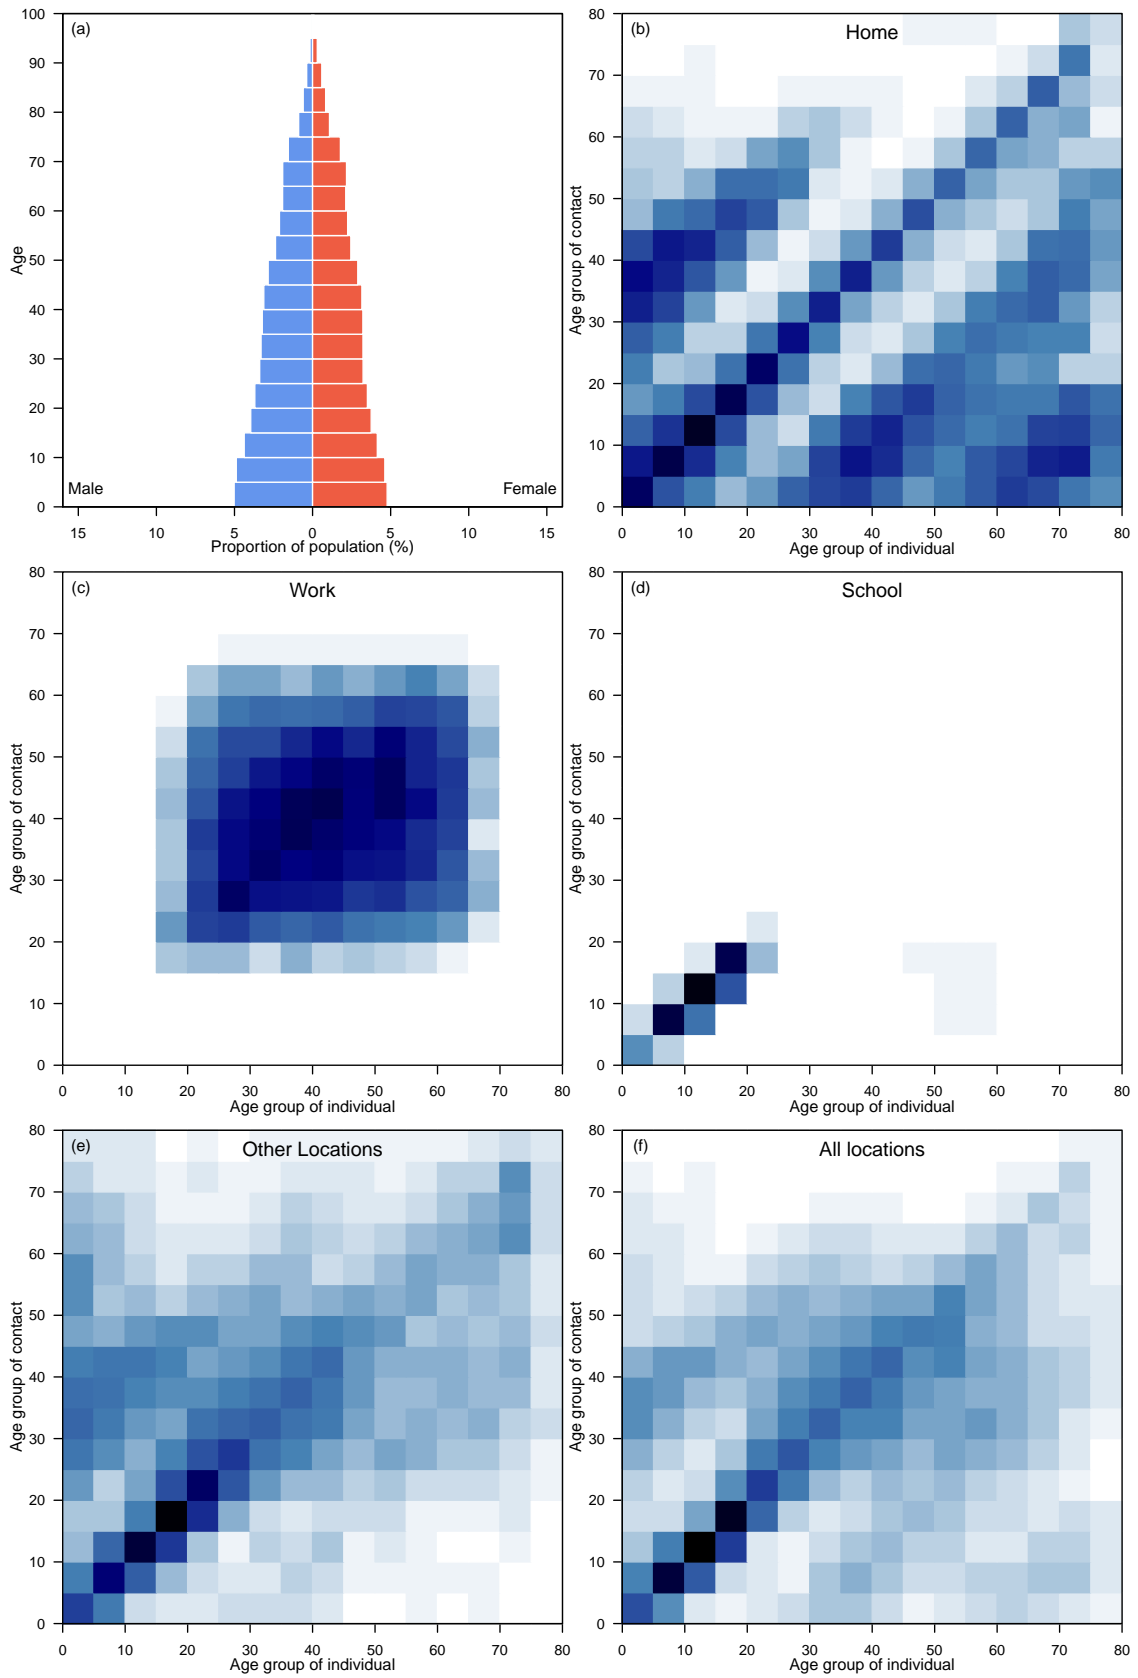

# Italy

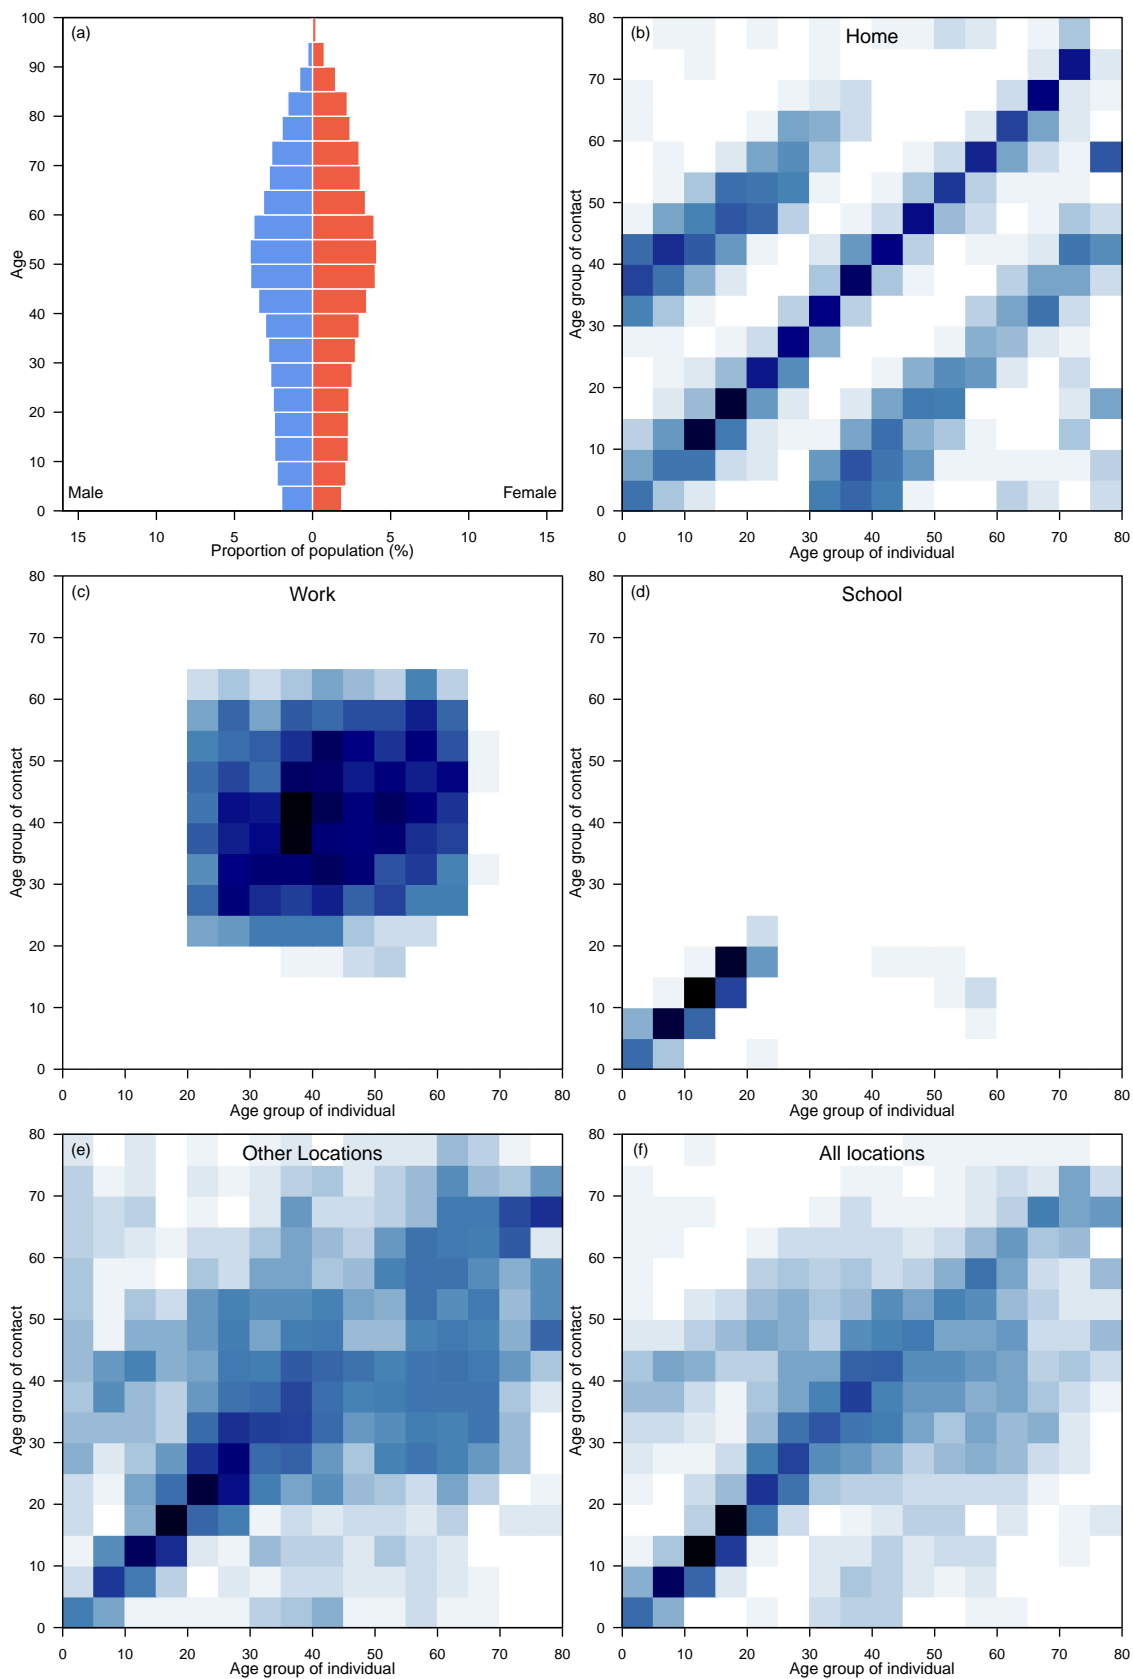

# Jamaica

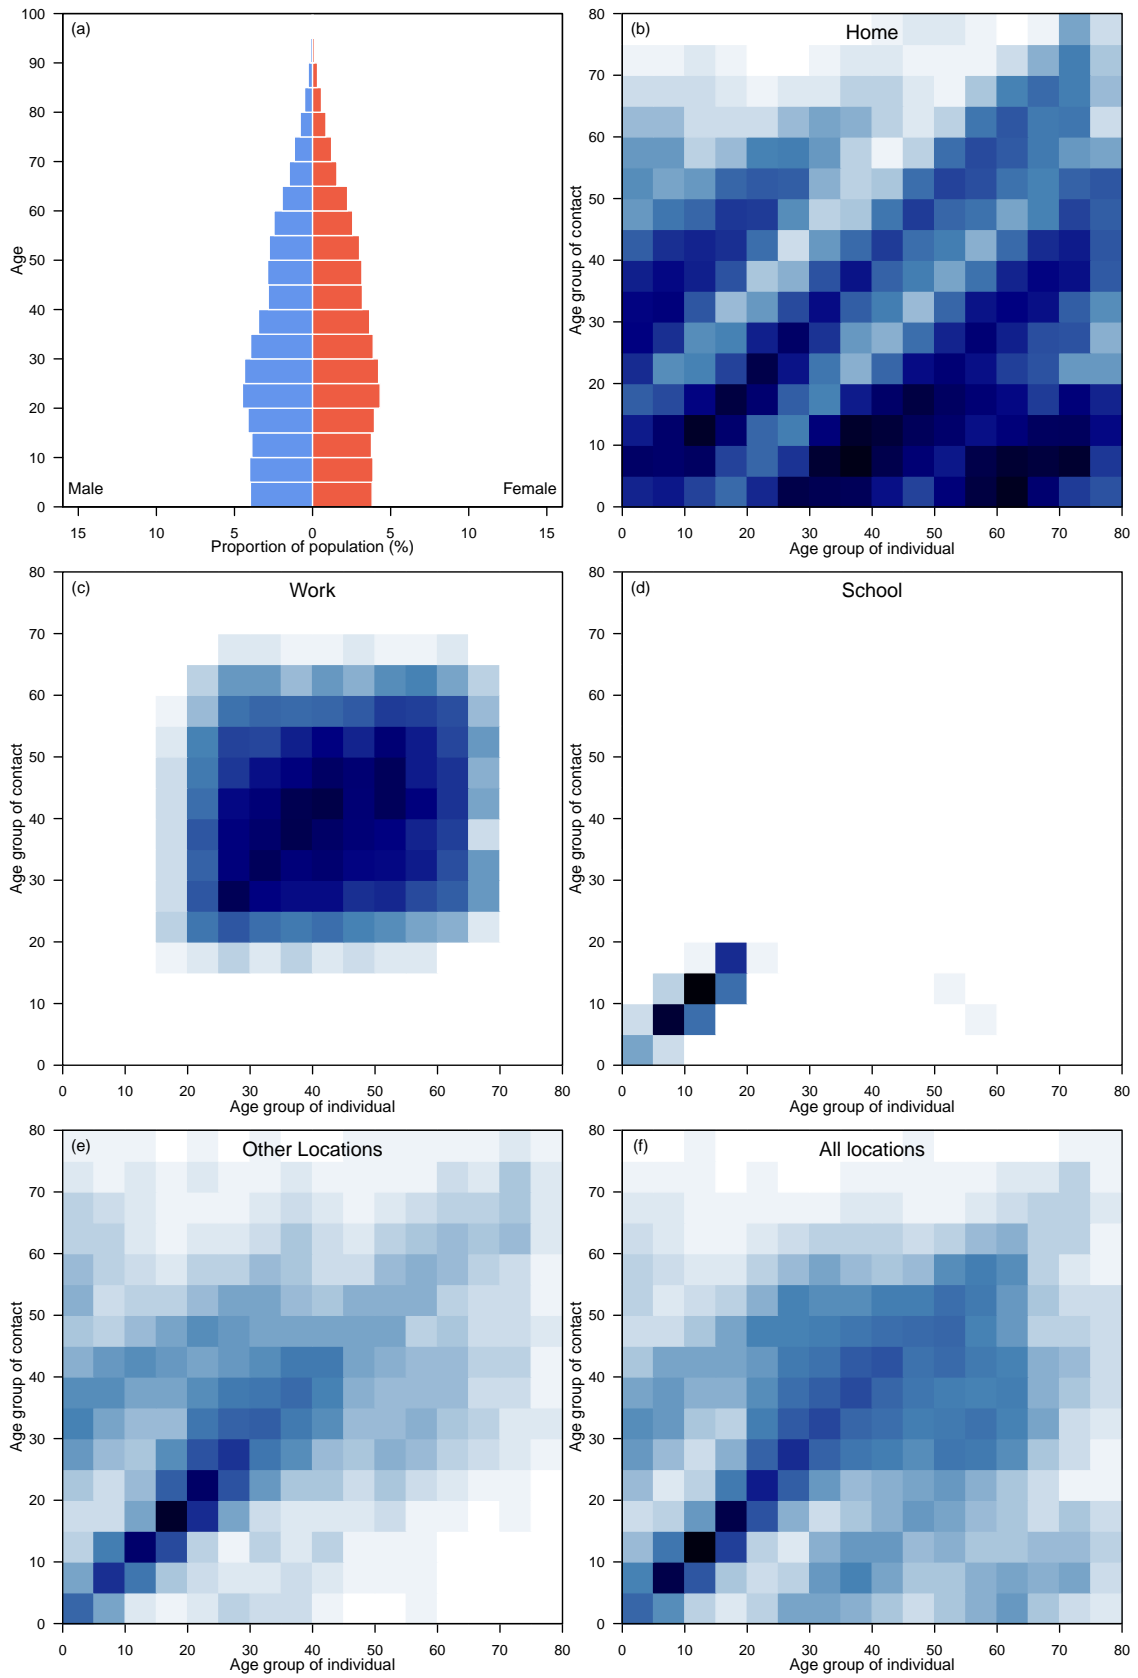



# Jordan

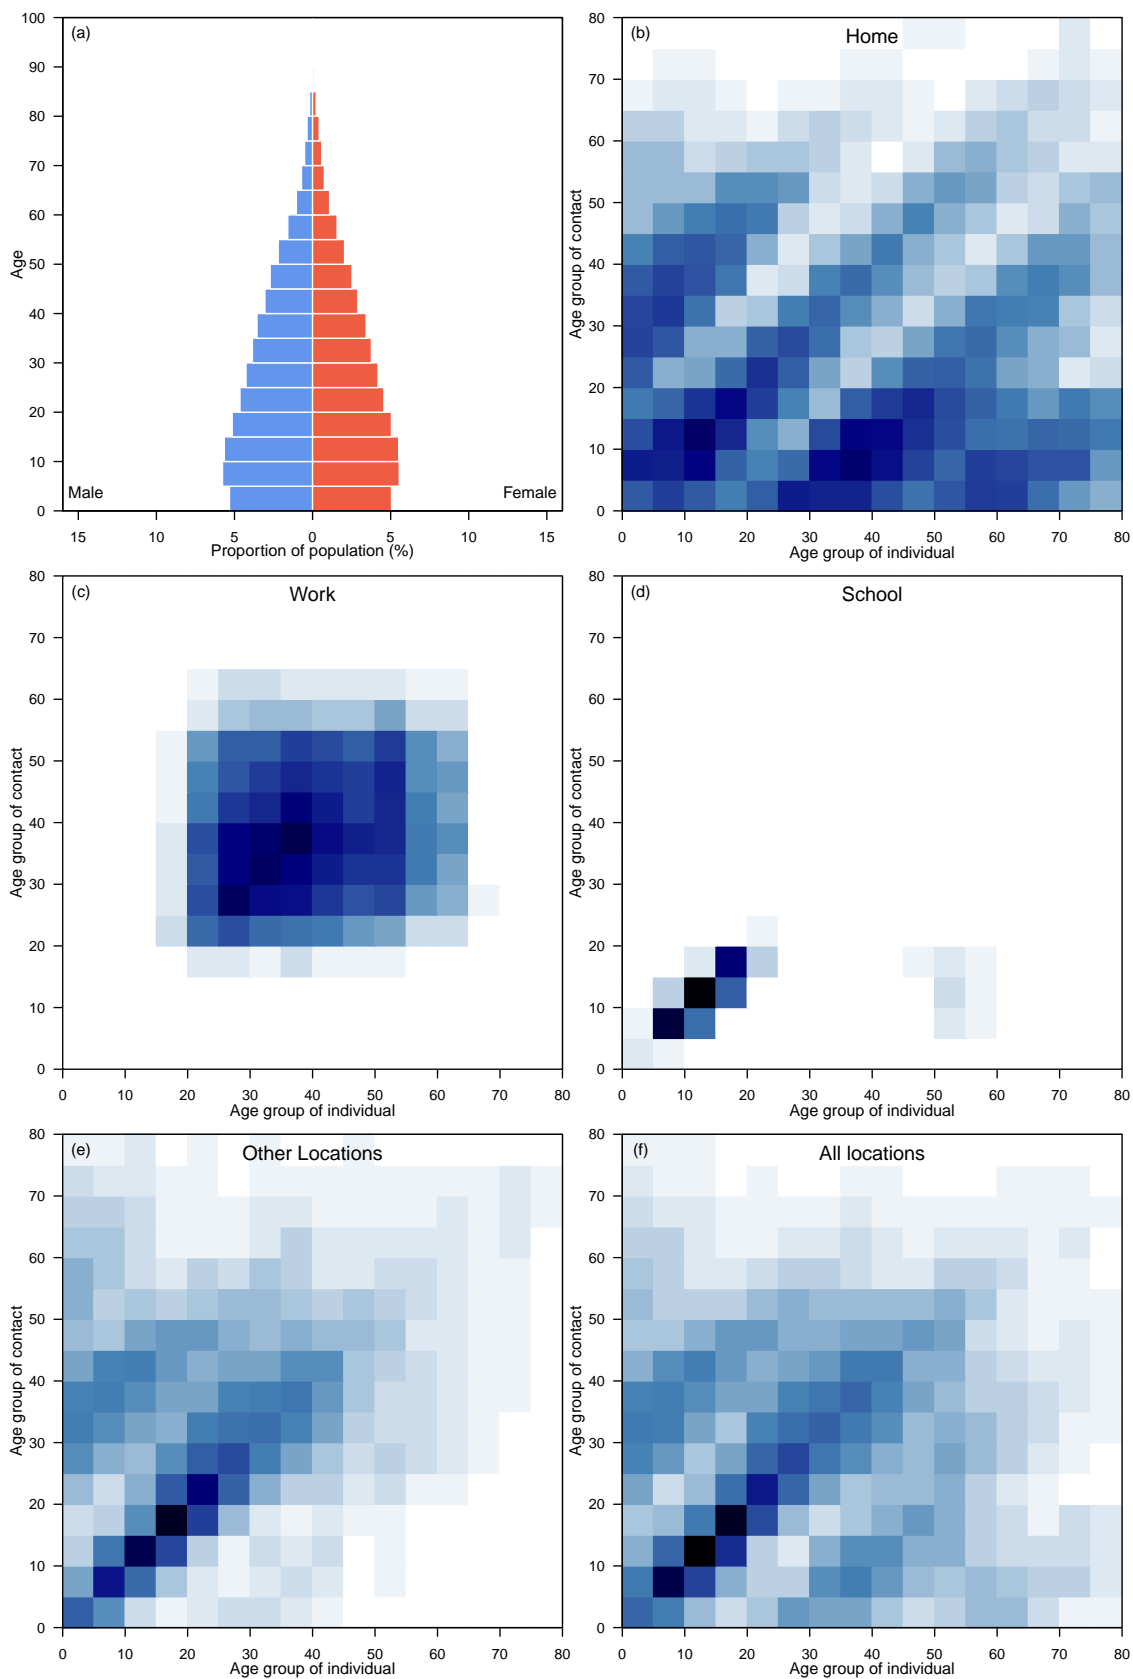

# Kazakhstan

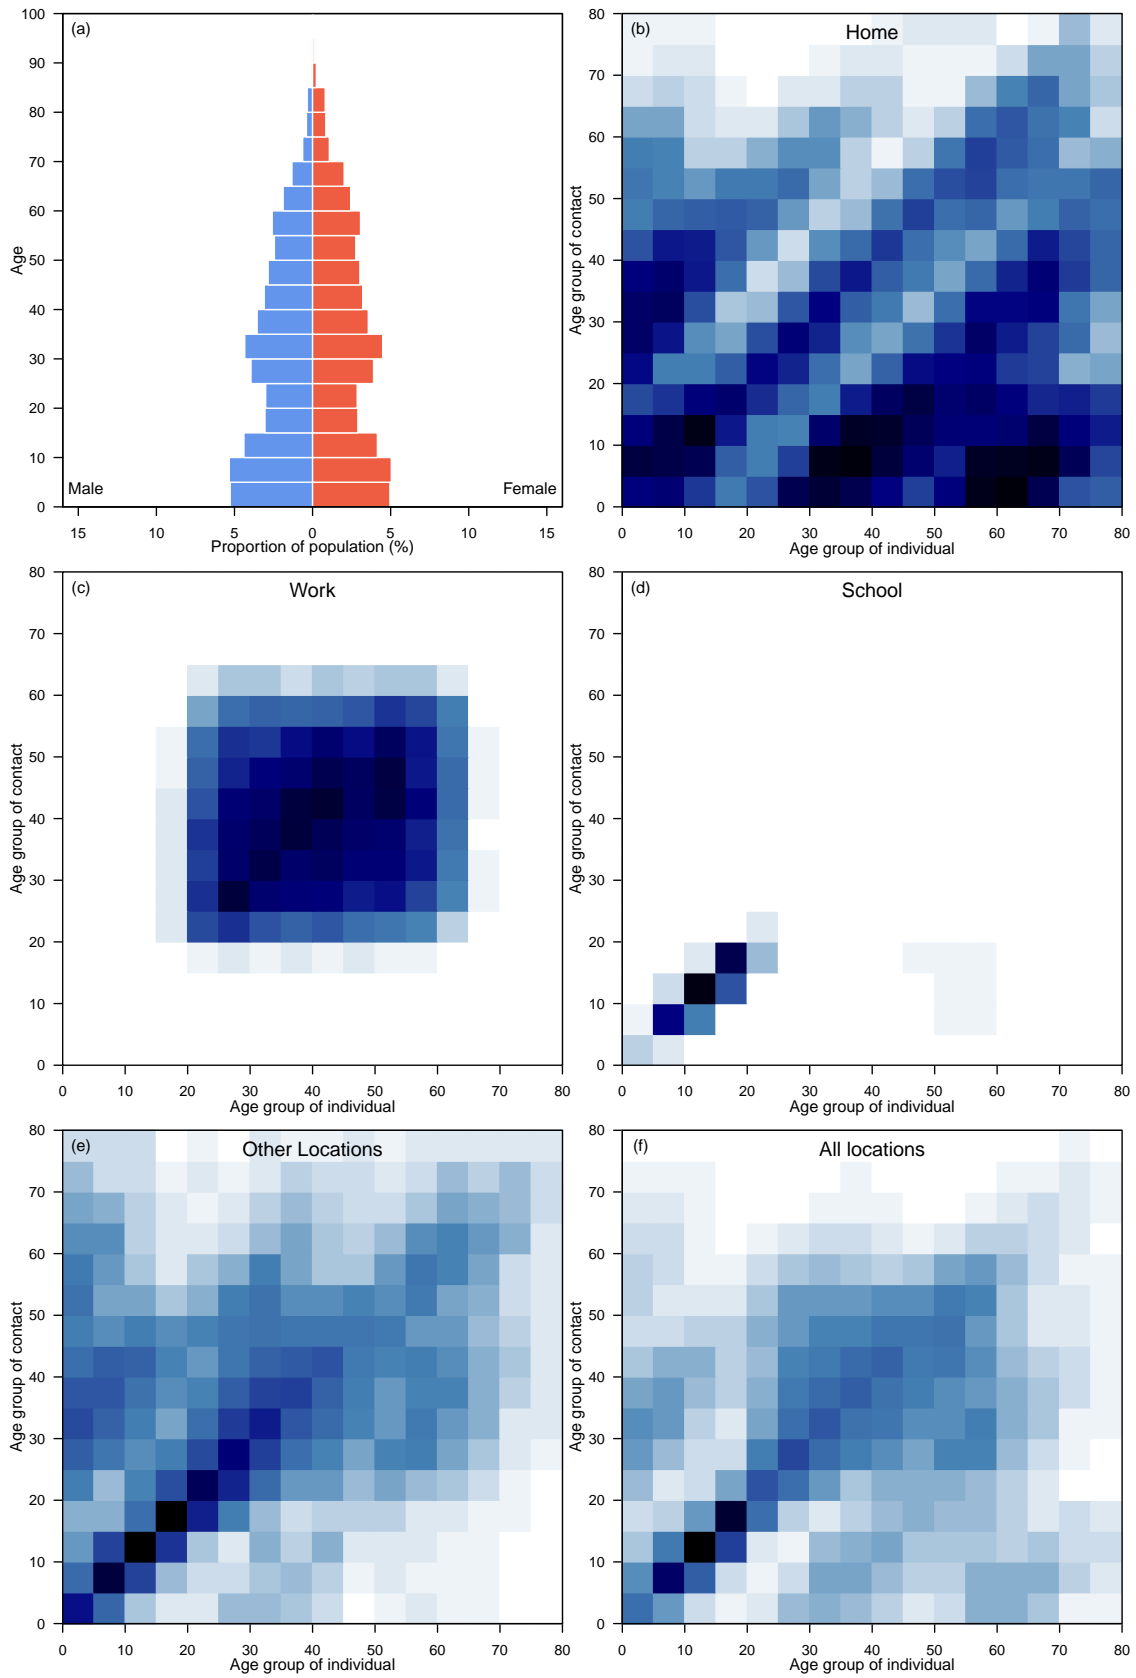

# Kenya

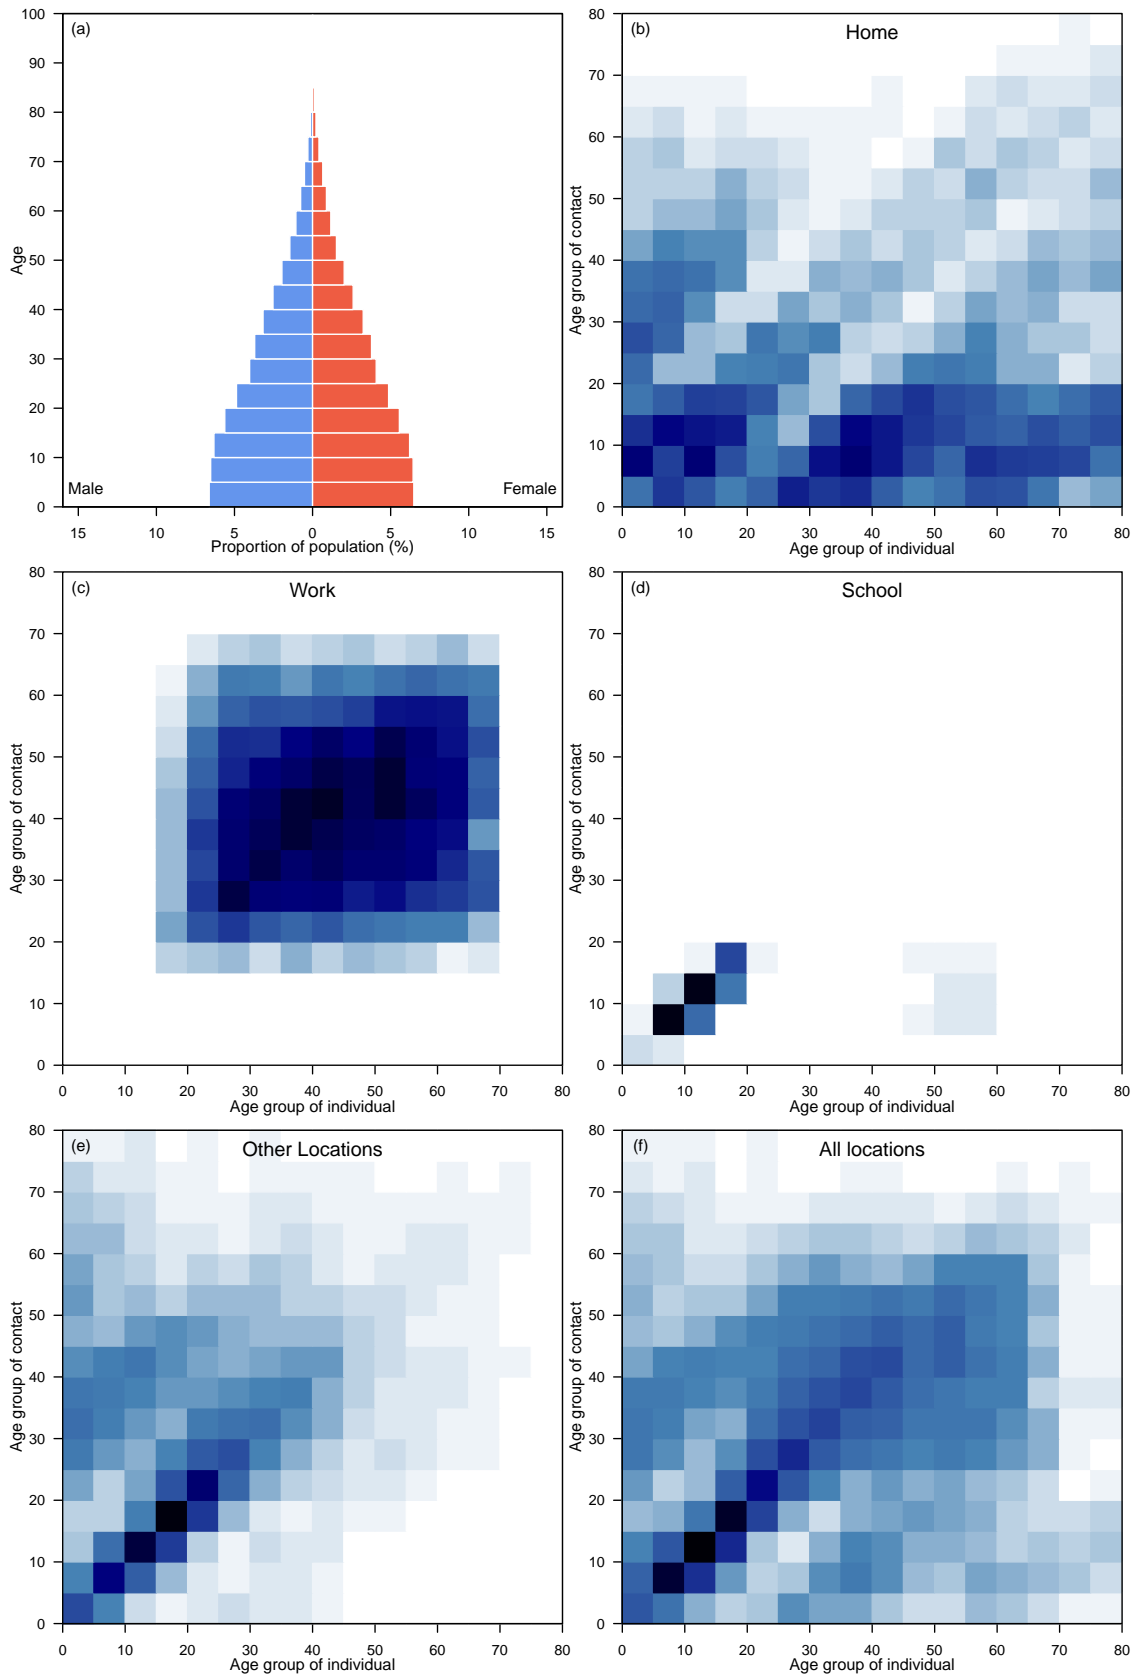

# Kuwait

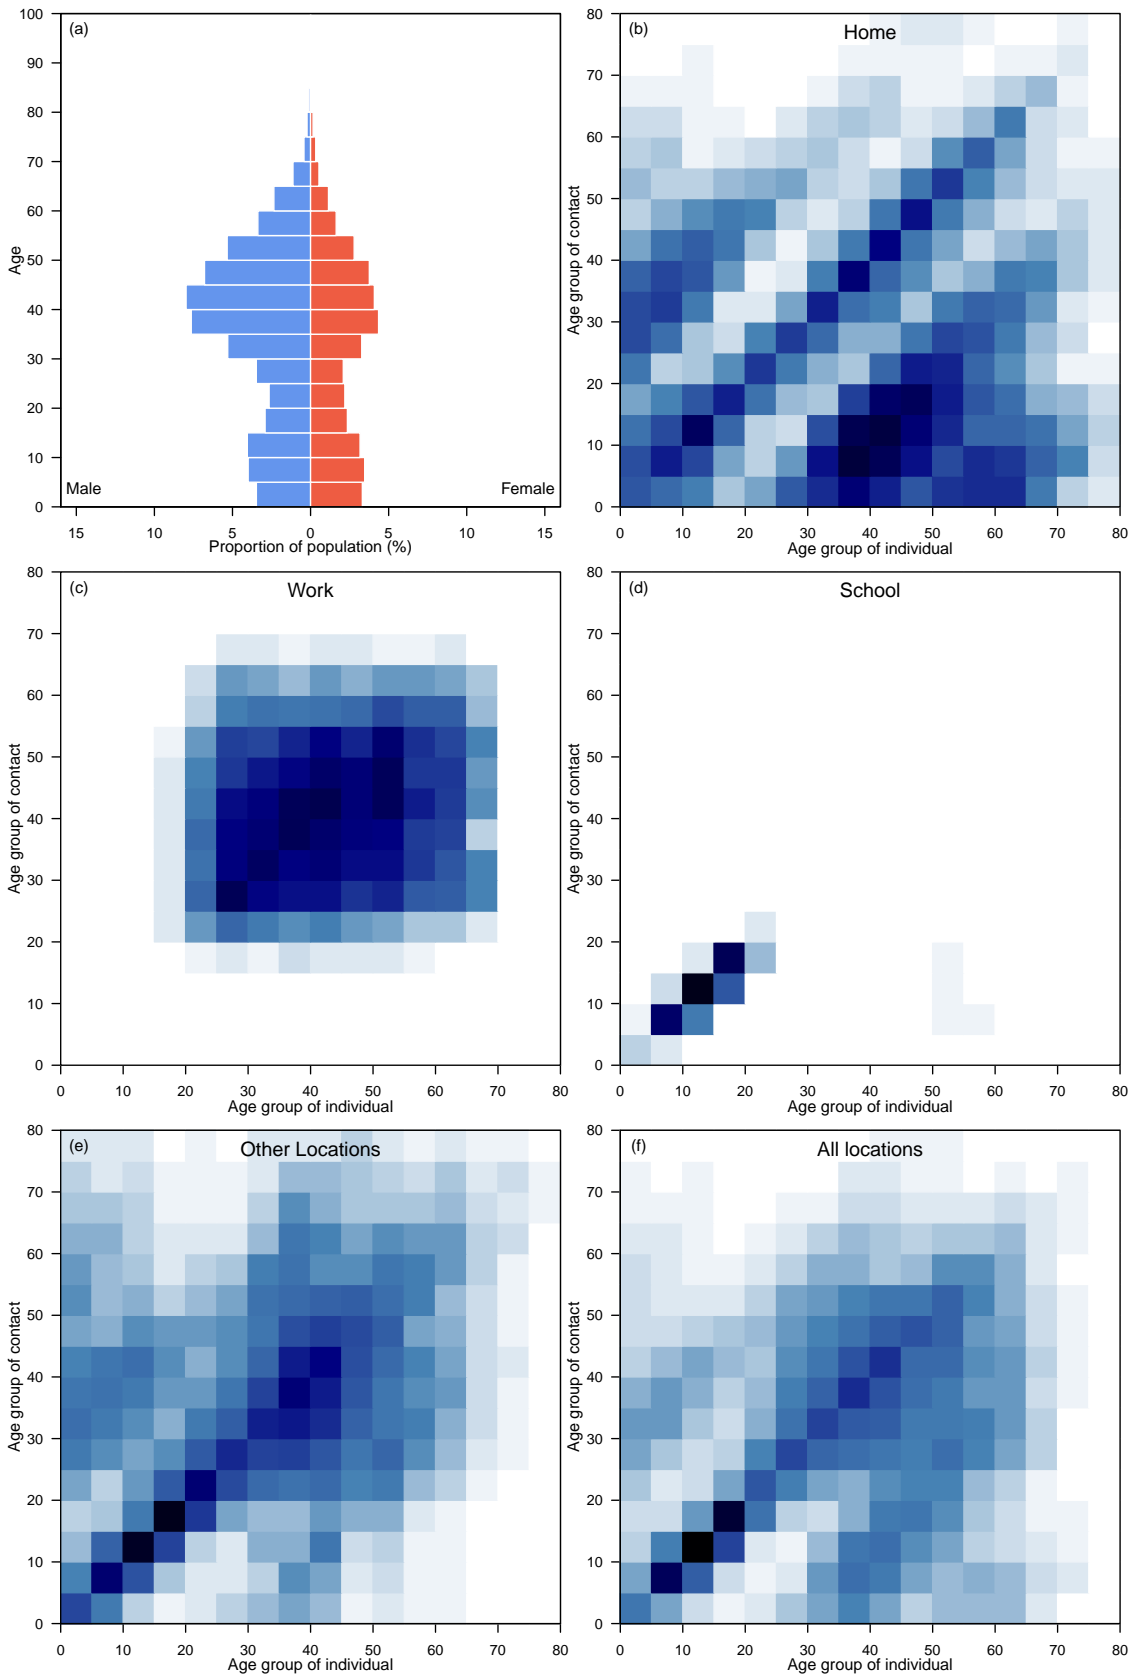

# Kyrgyzstan

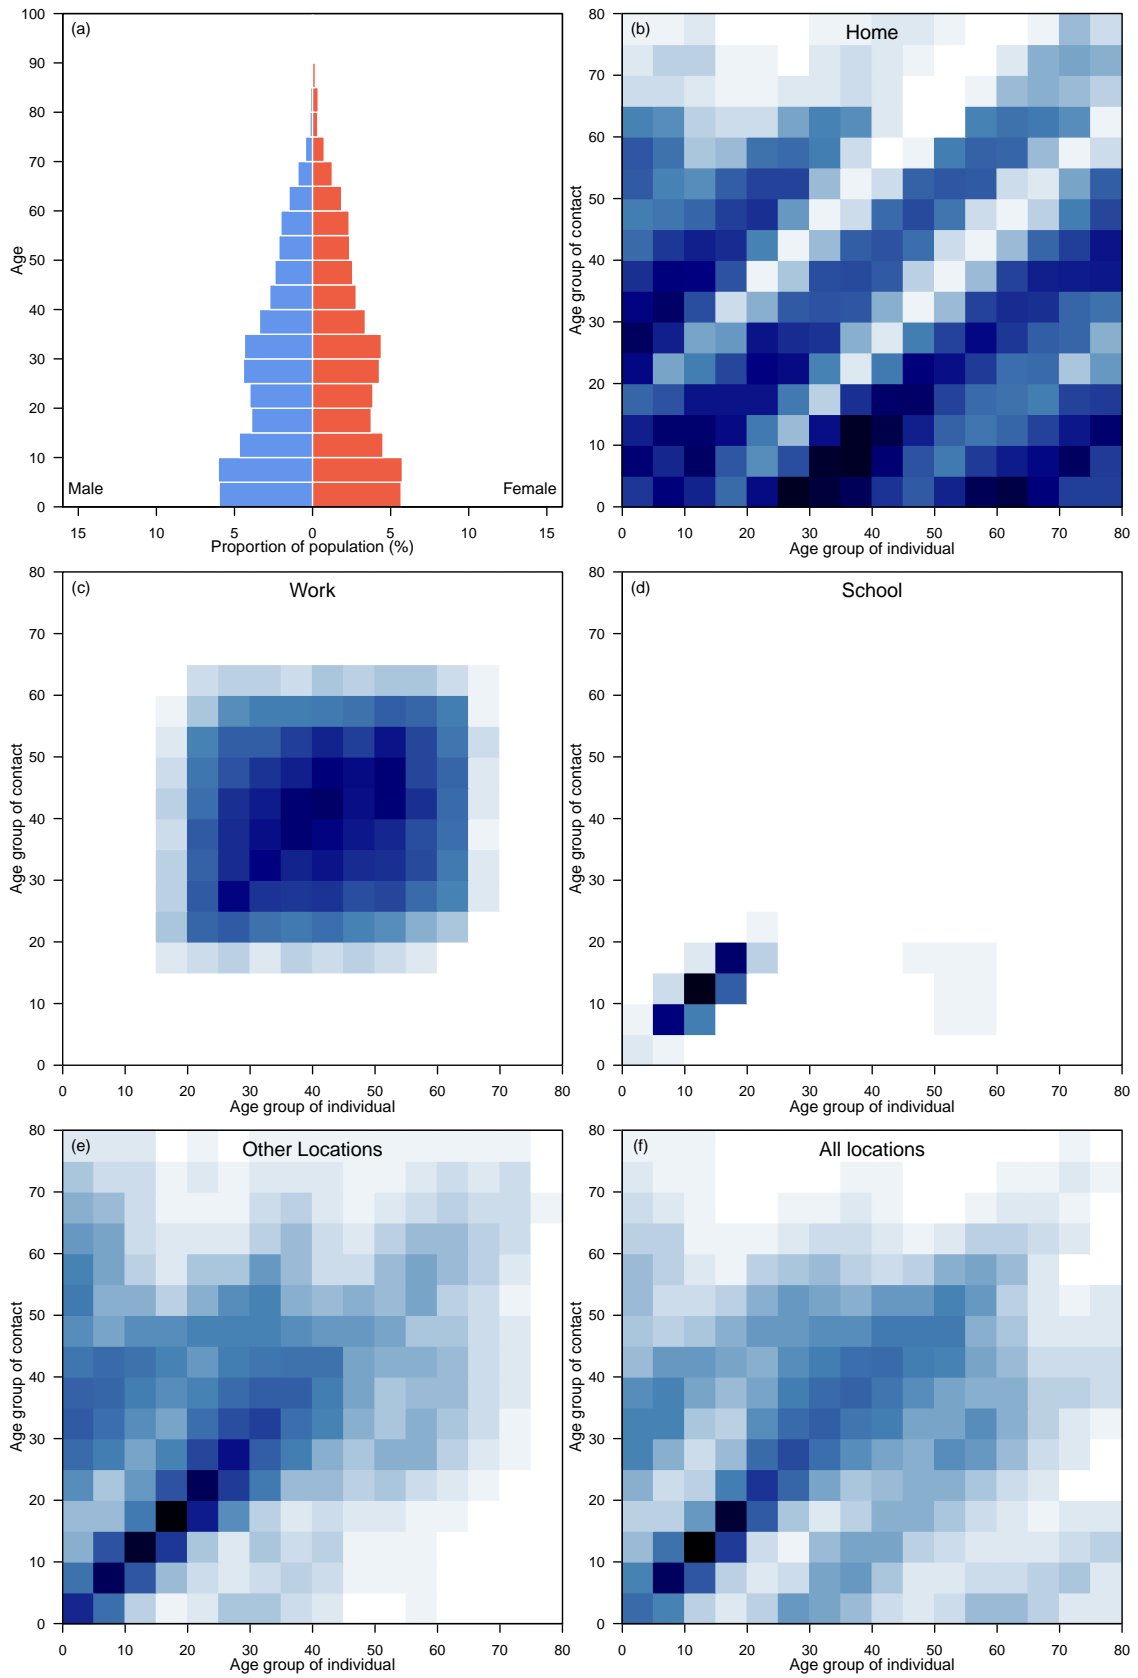

# Lao People's Democratic Republic

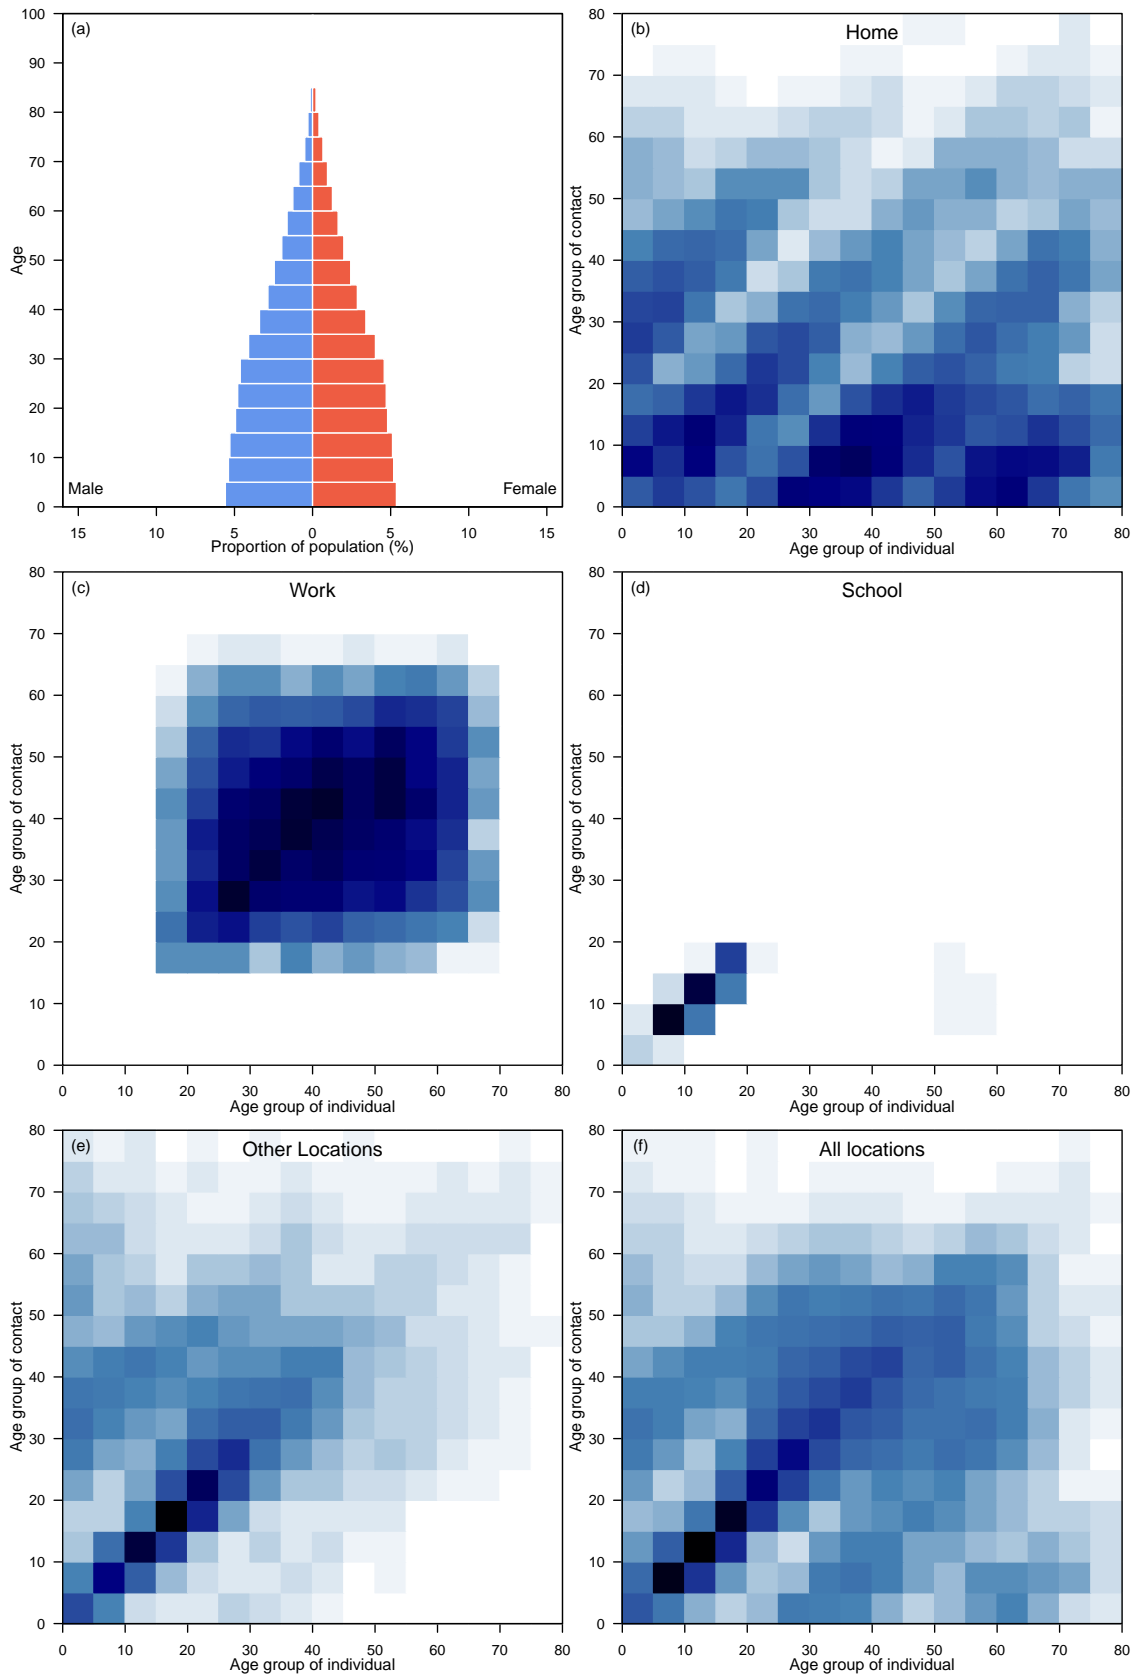

# Latvia

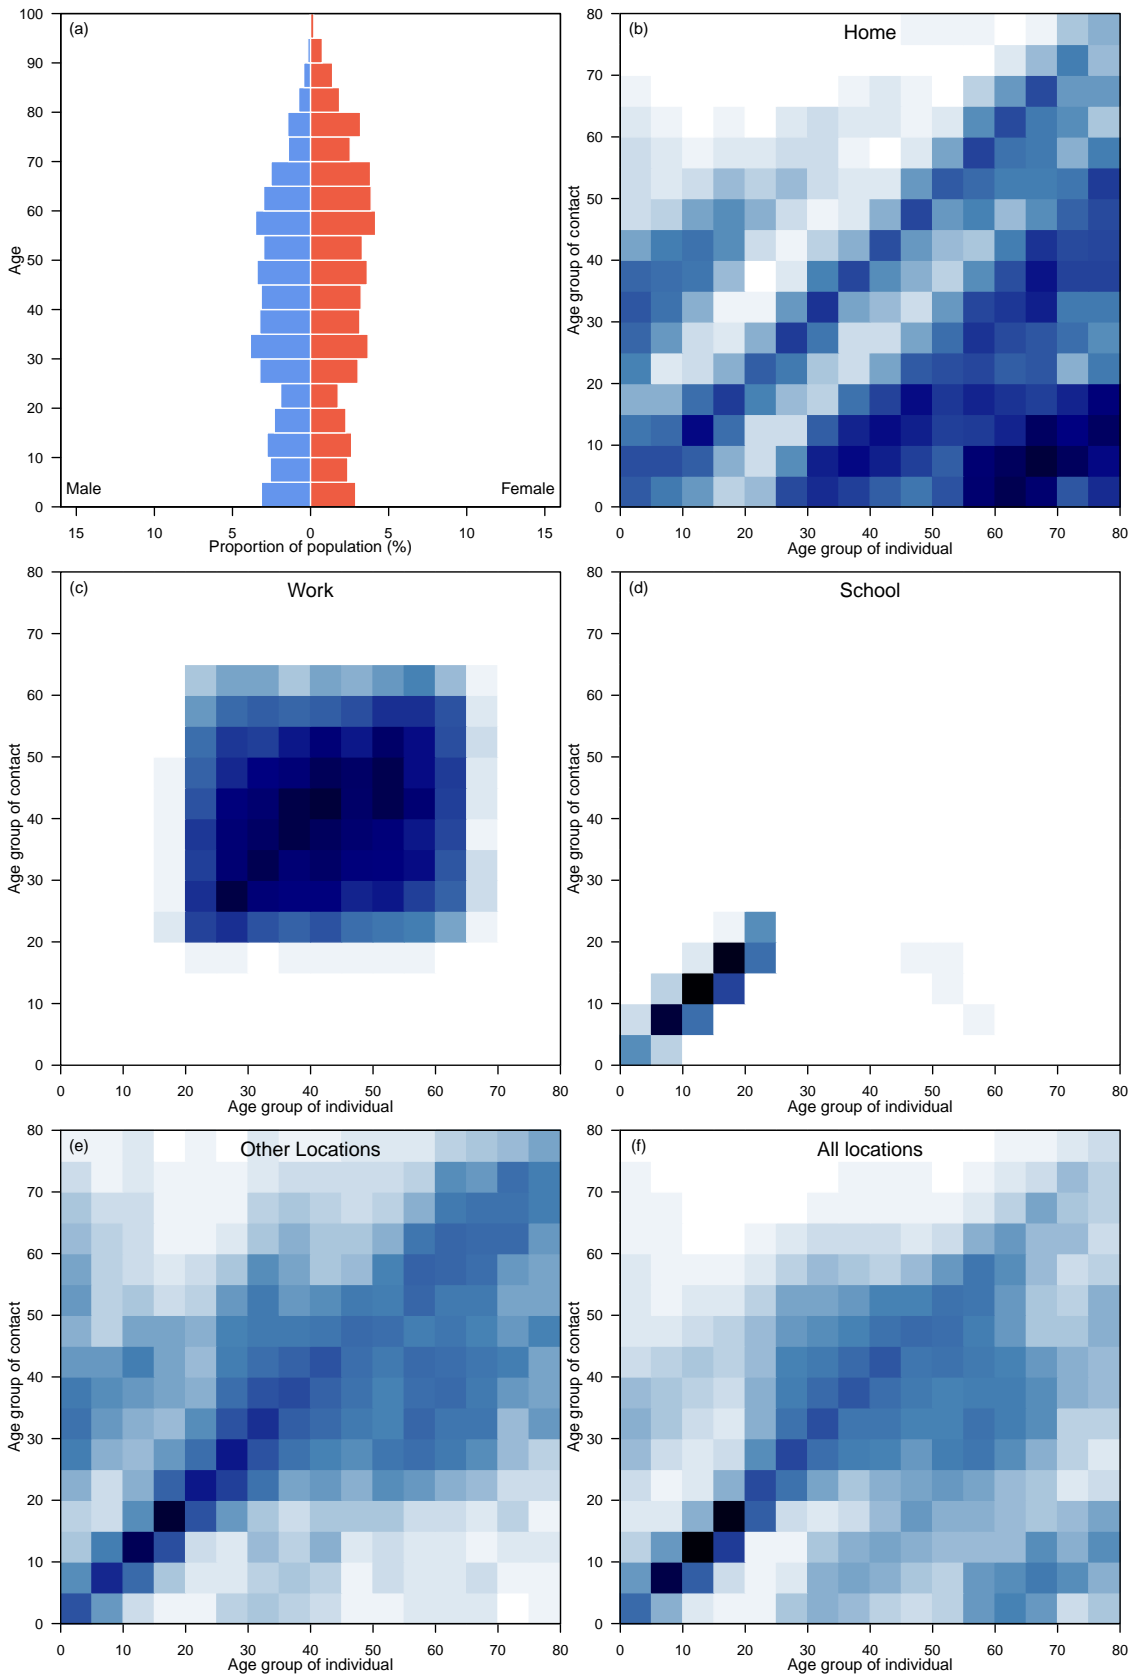

# Lesotho

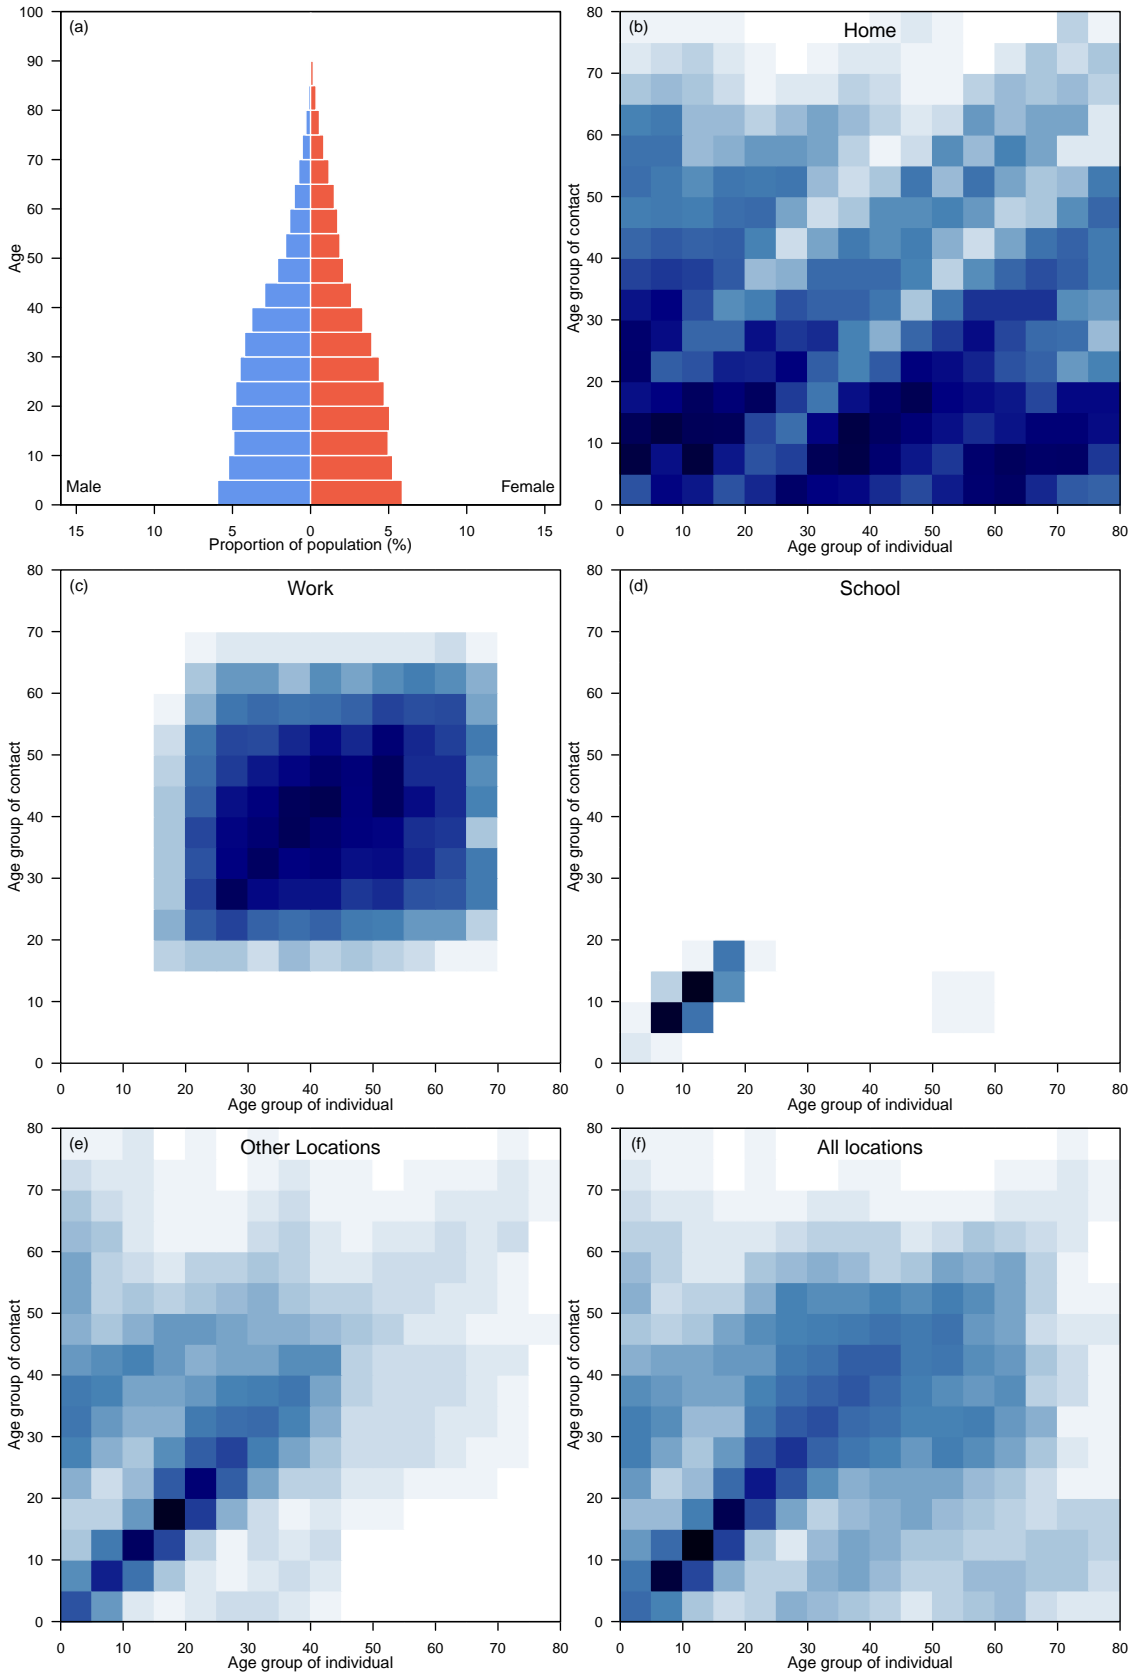



# Liberia

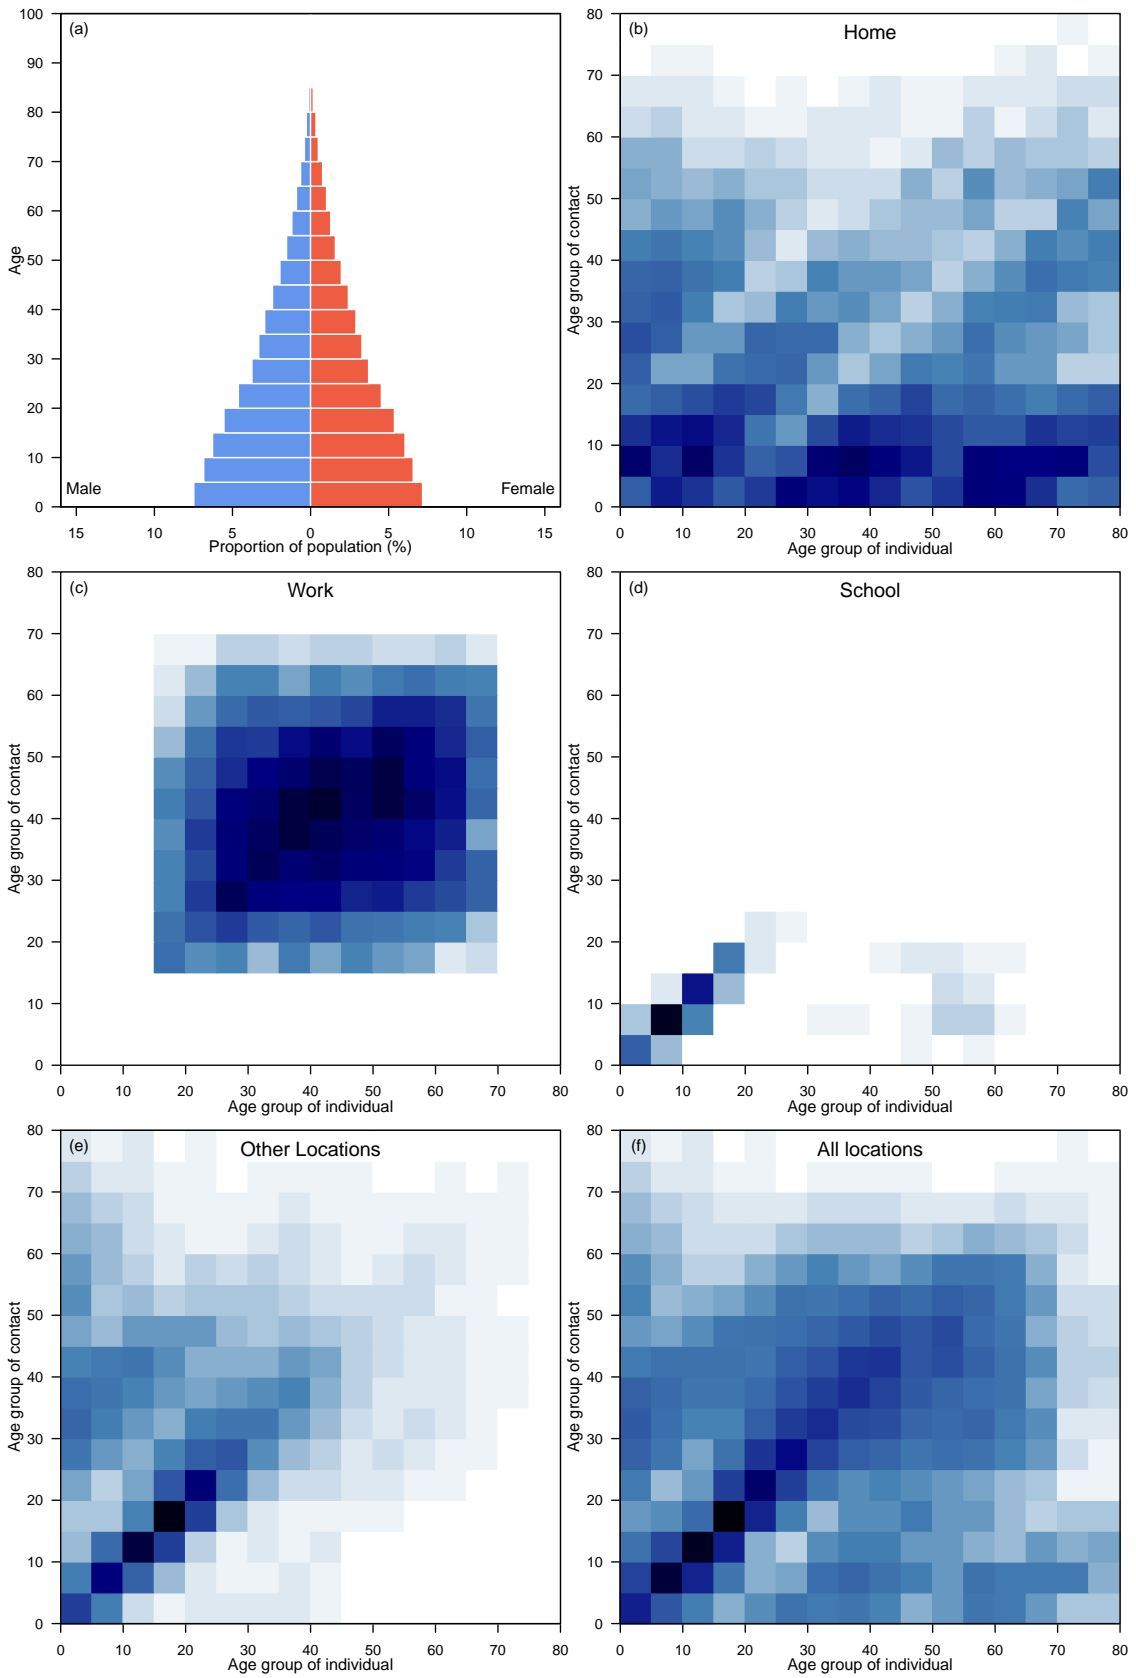

# Libya

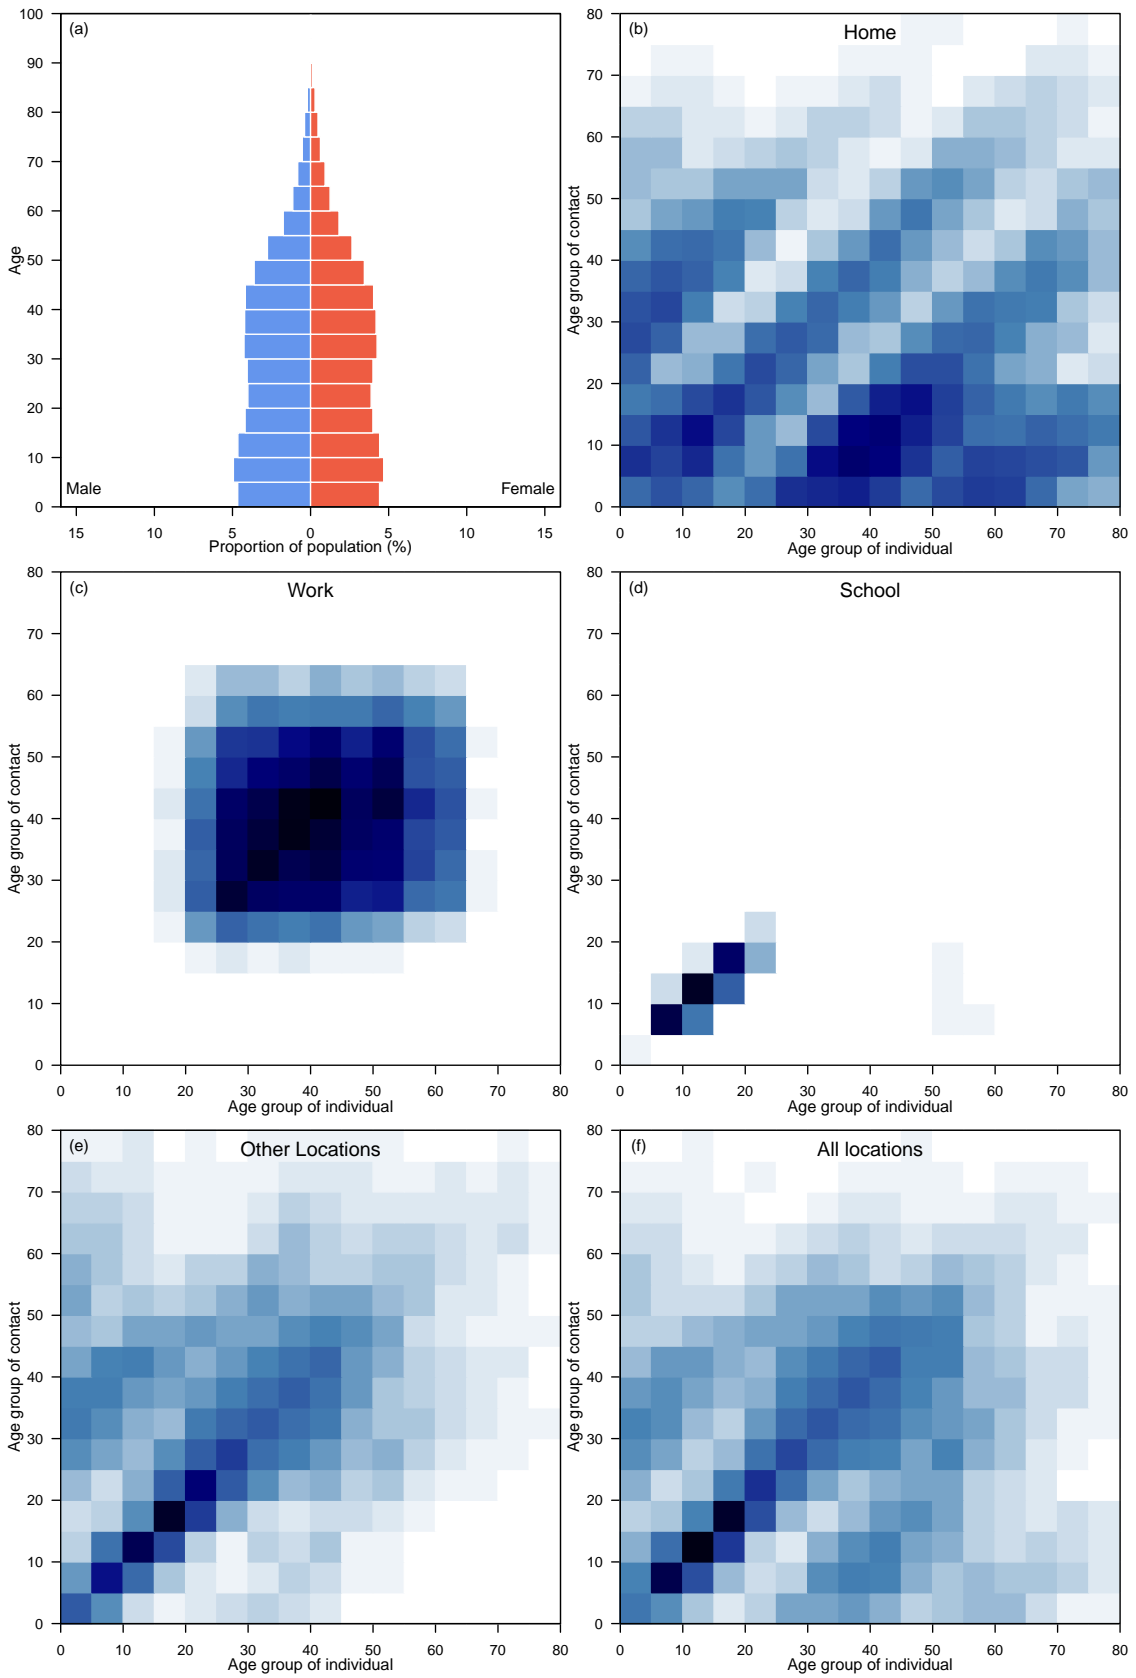

# Lithuania

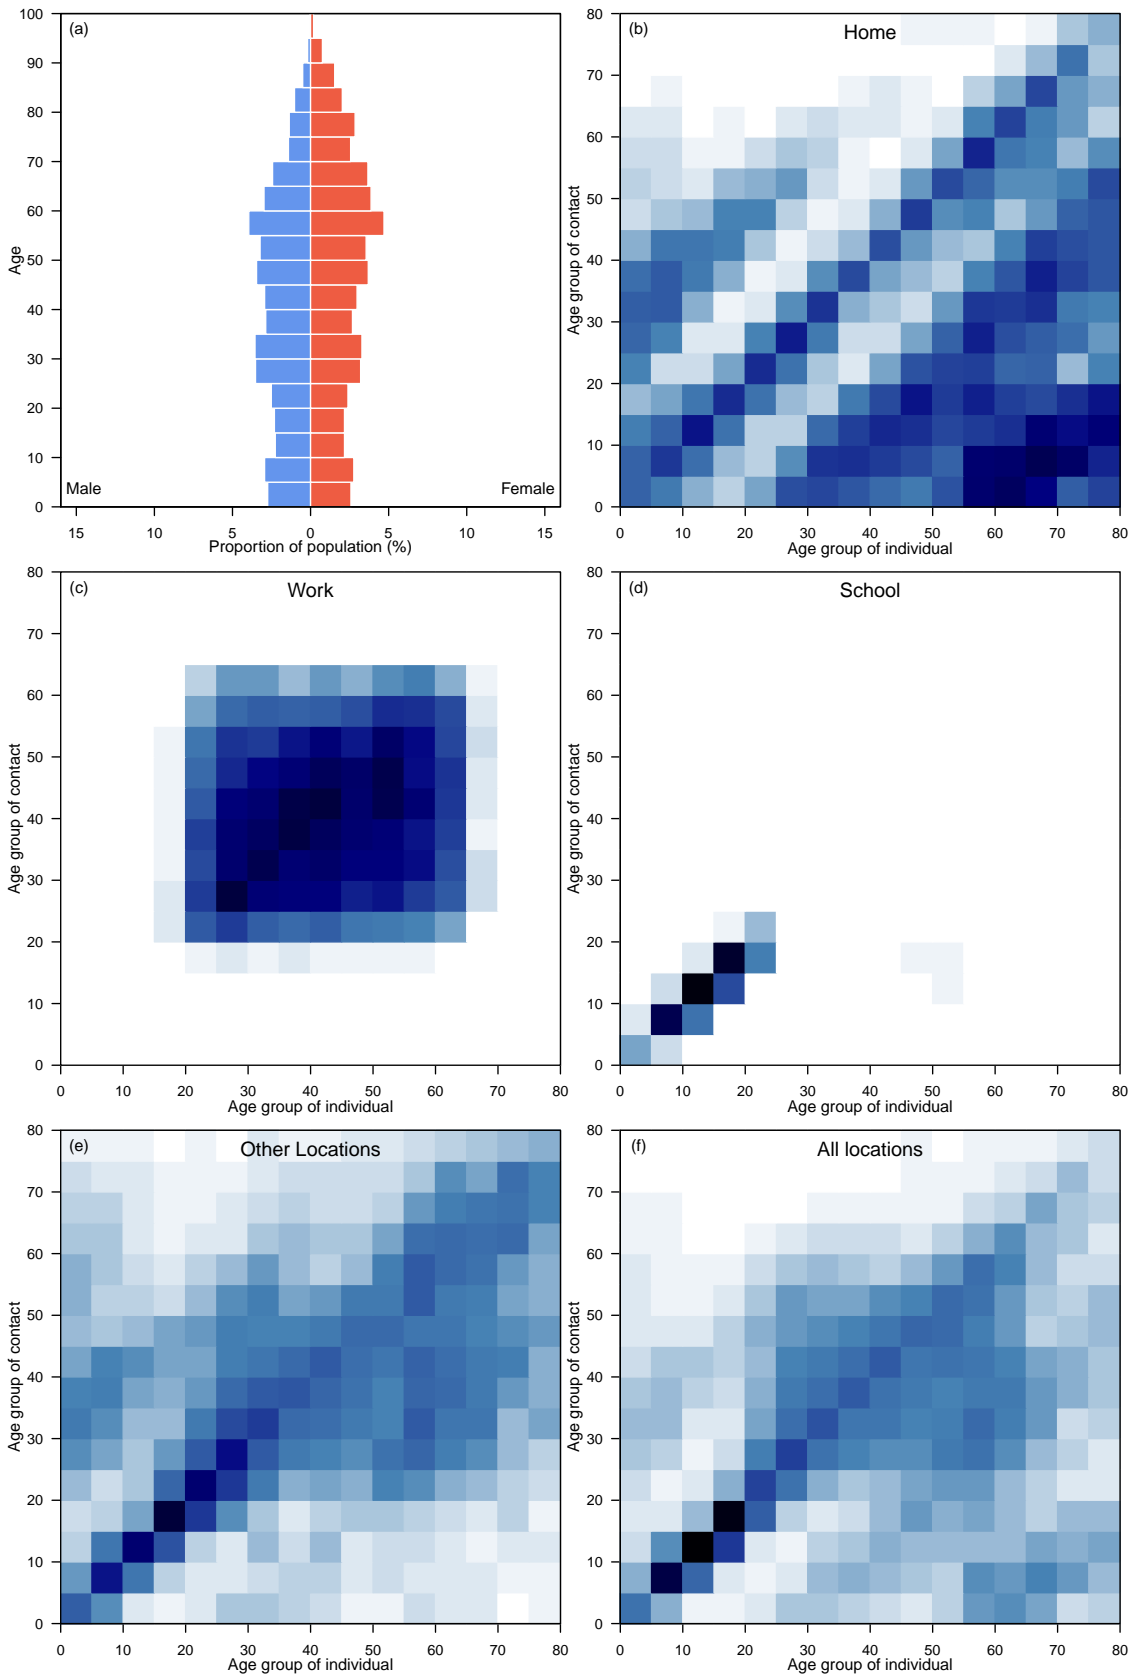

# Luxembourg

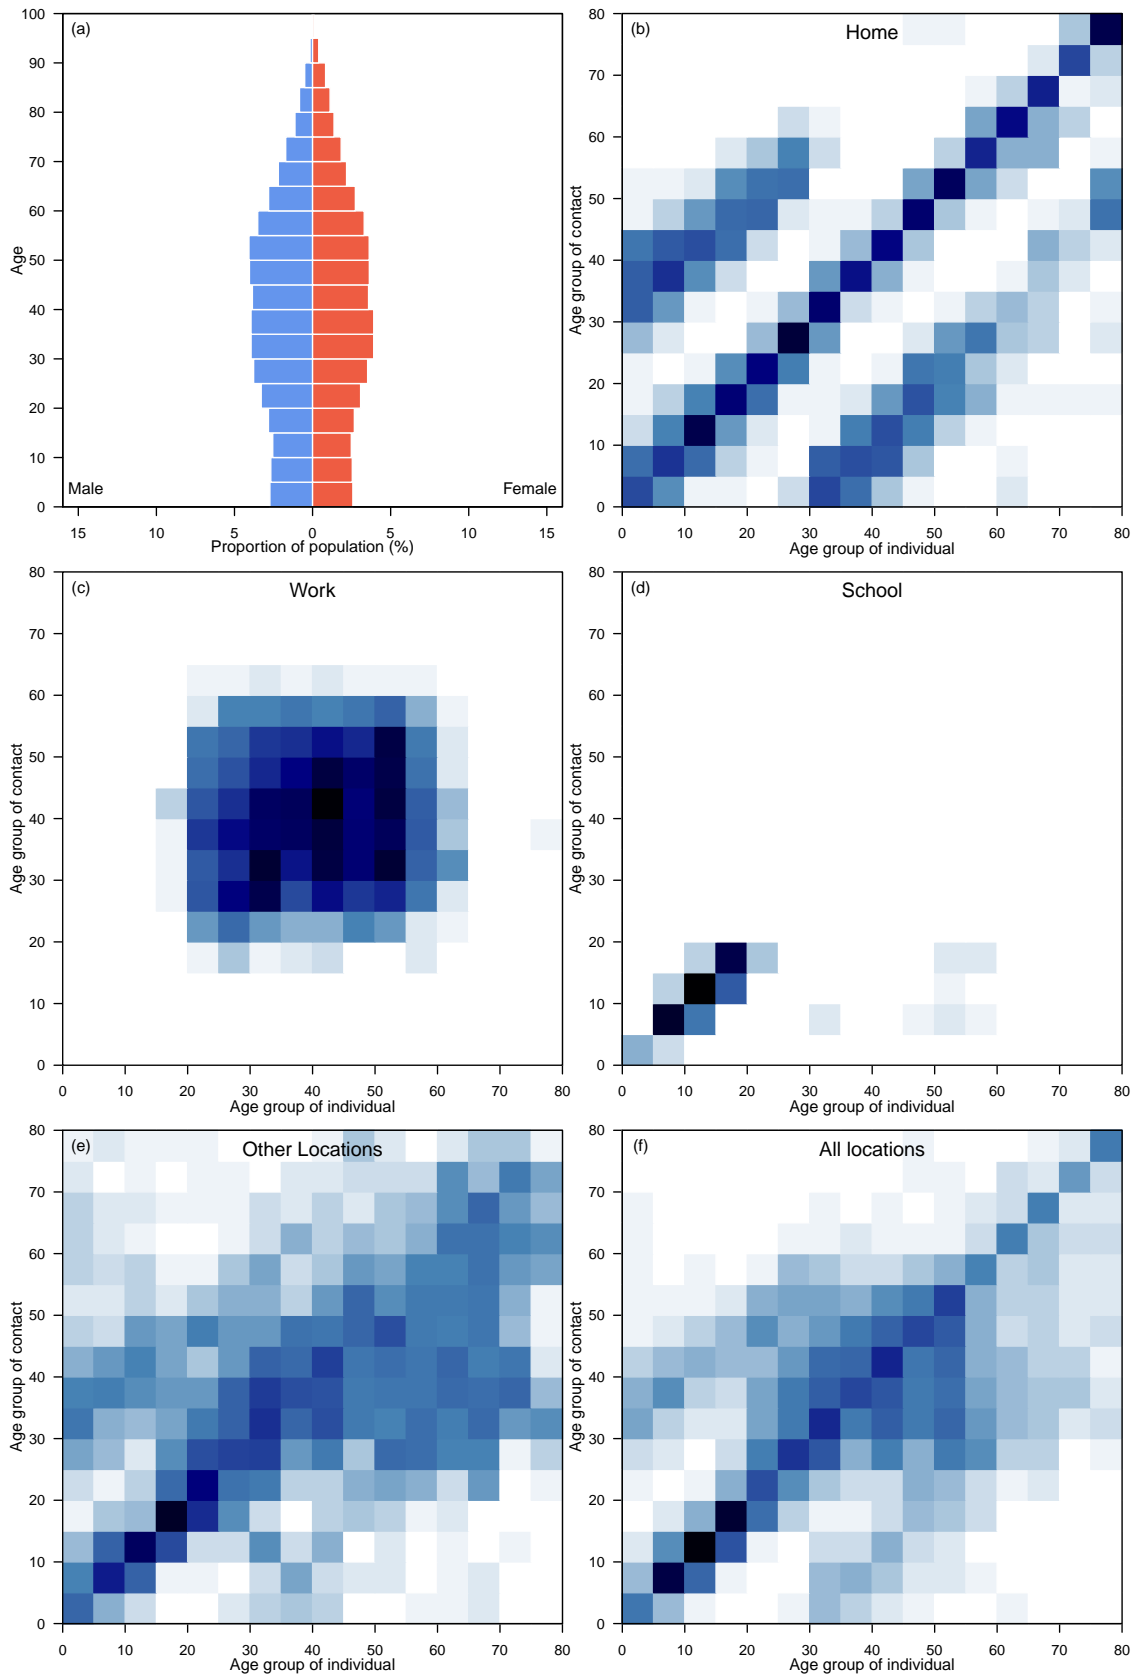

# Madagascar

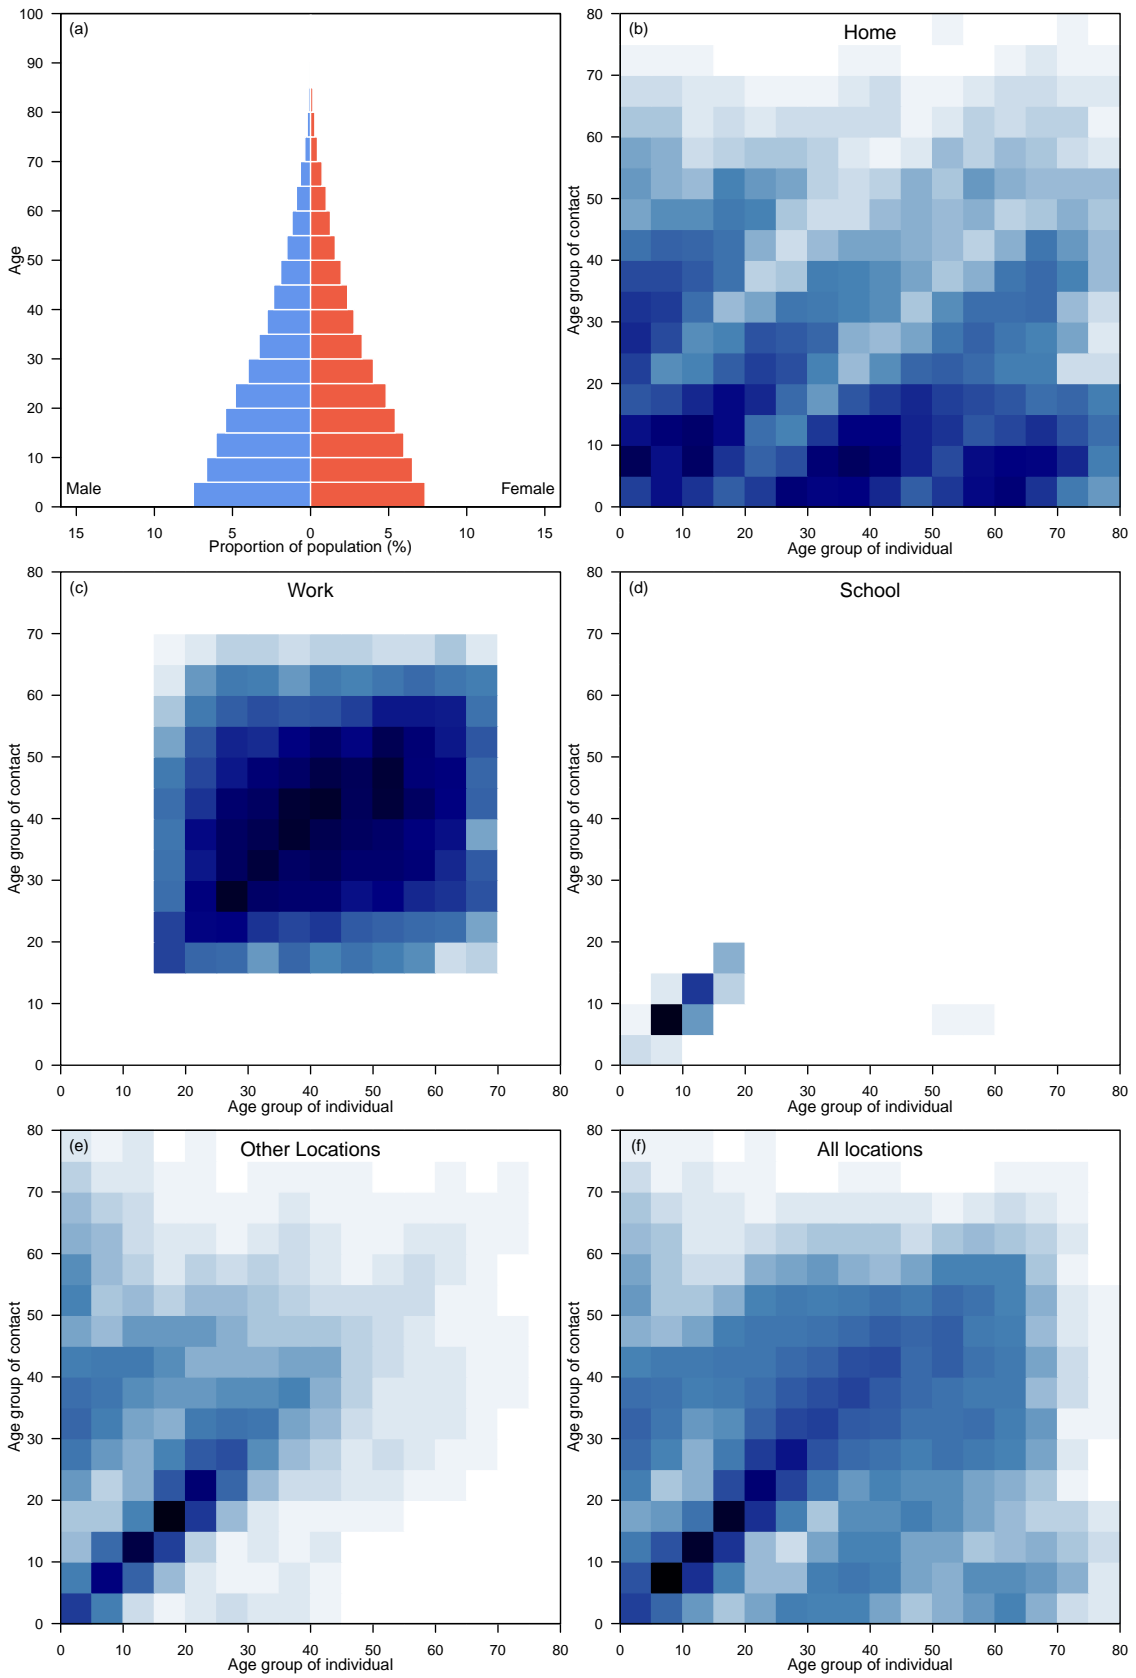

# Malawi

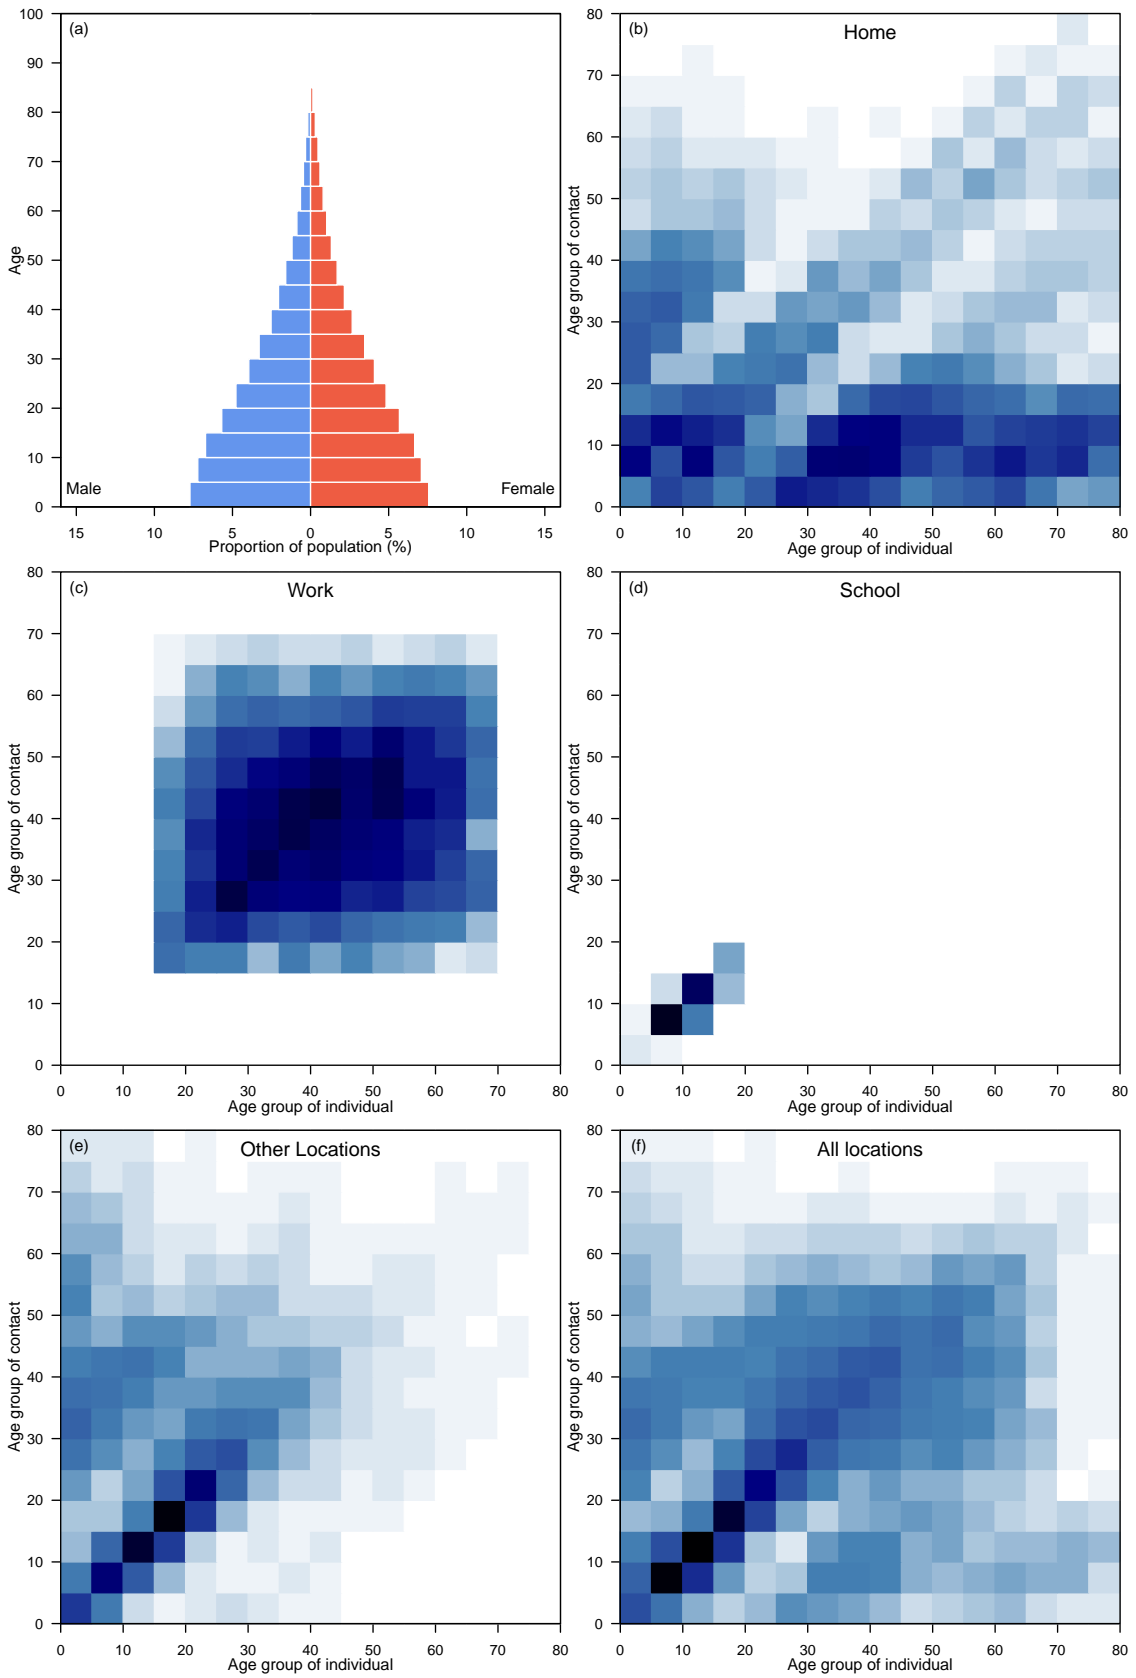

# Malaysia

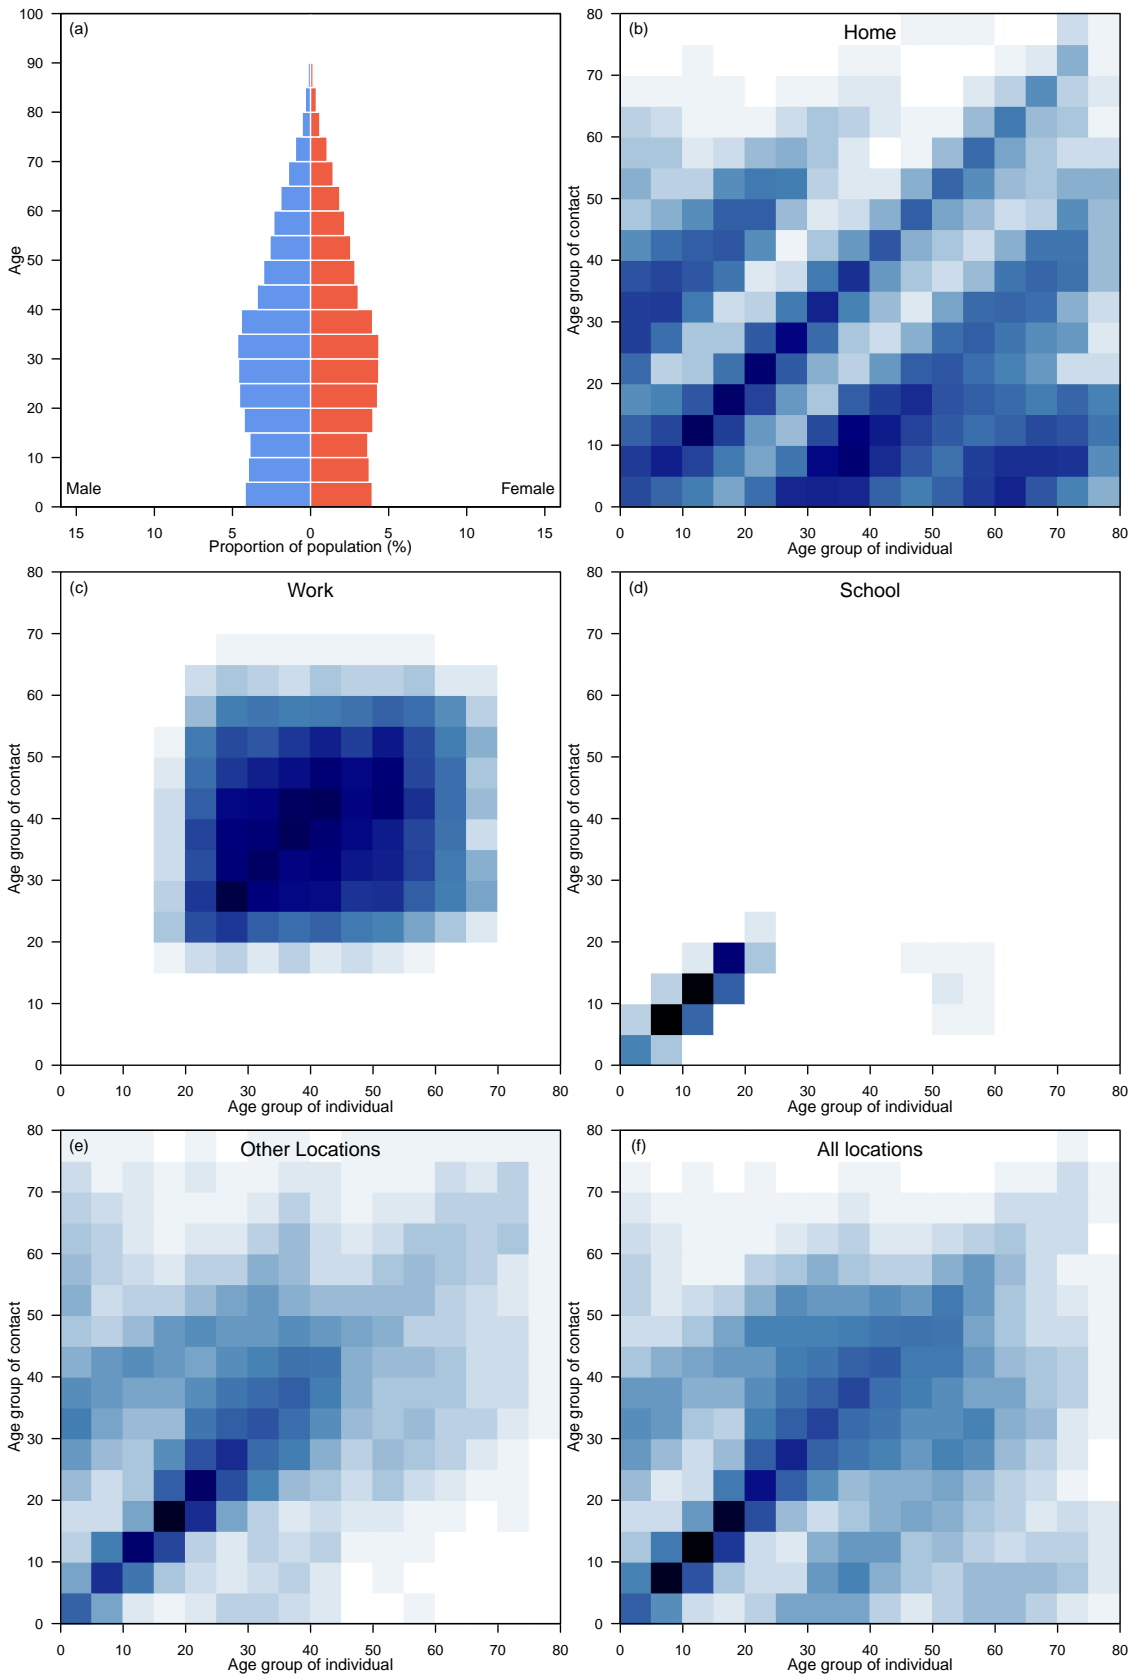

# Maldives

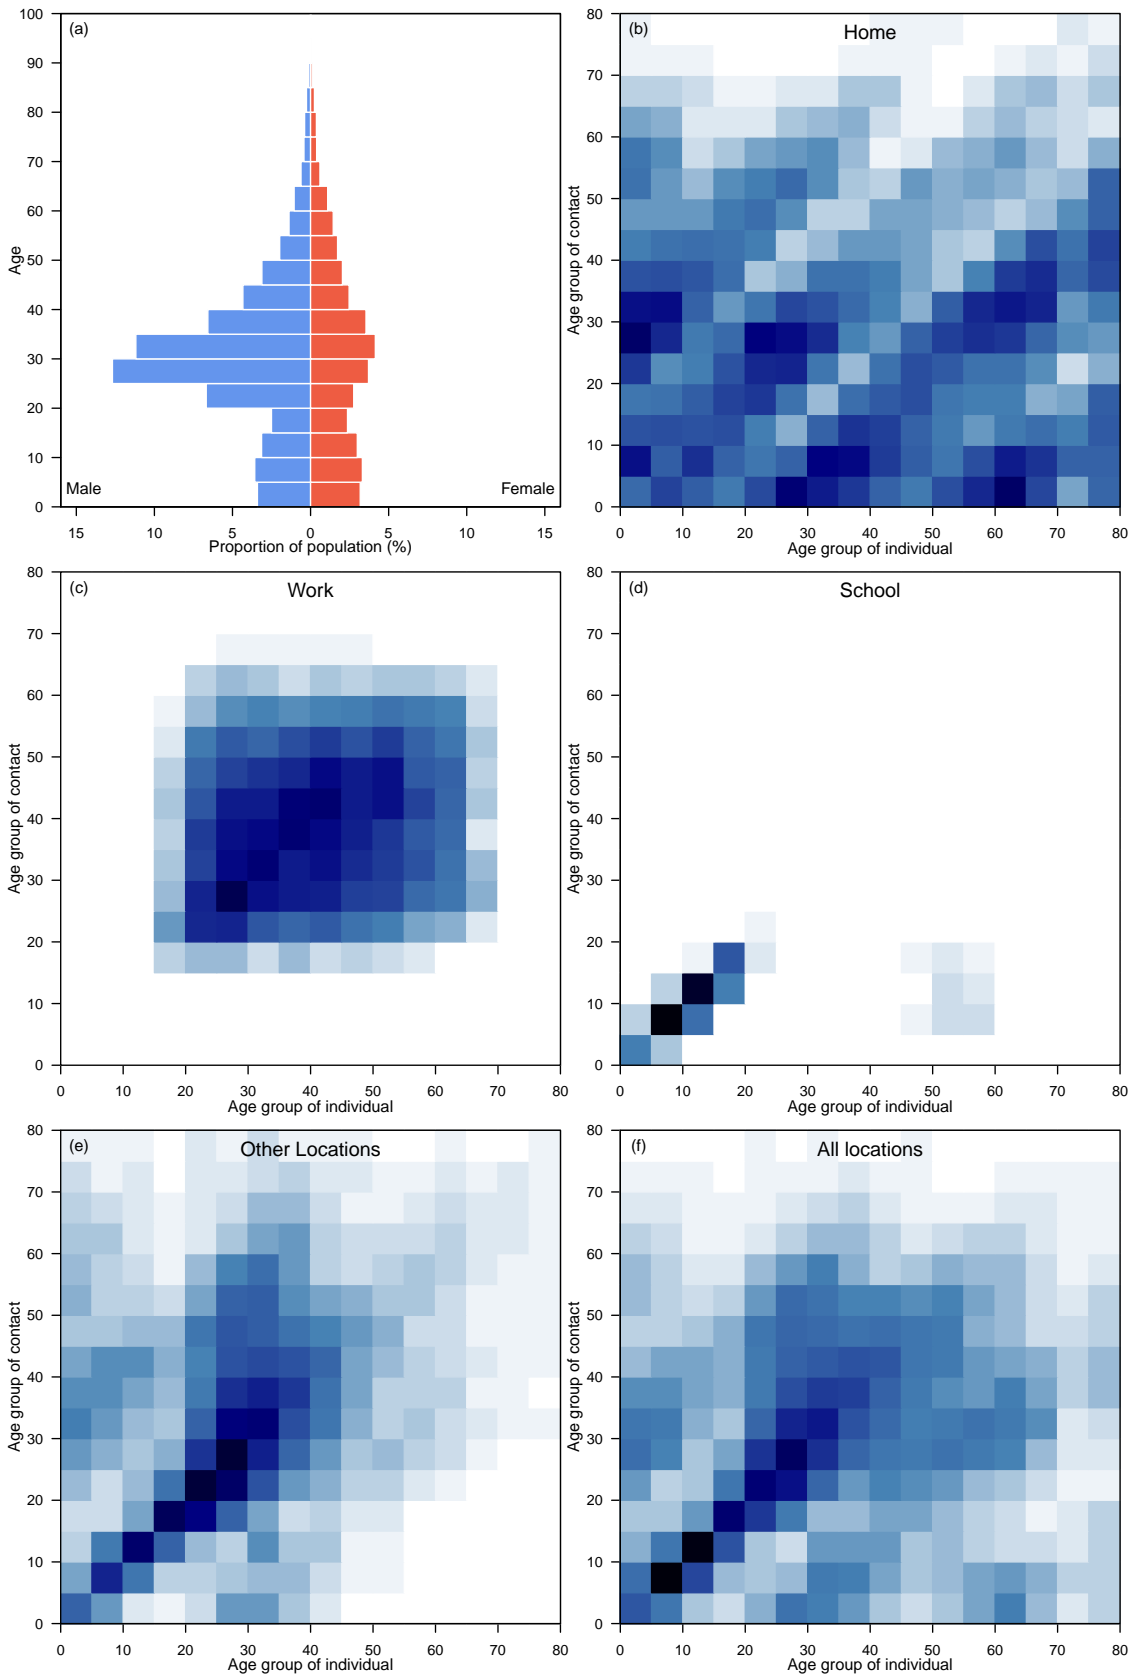



# Mali

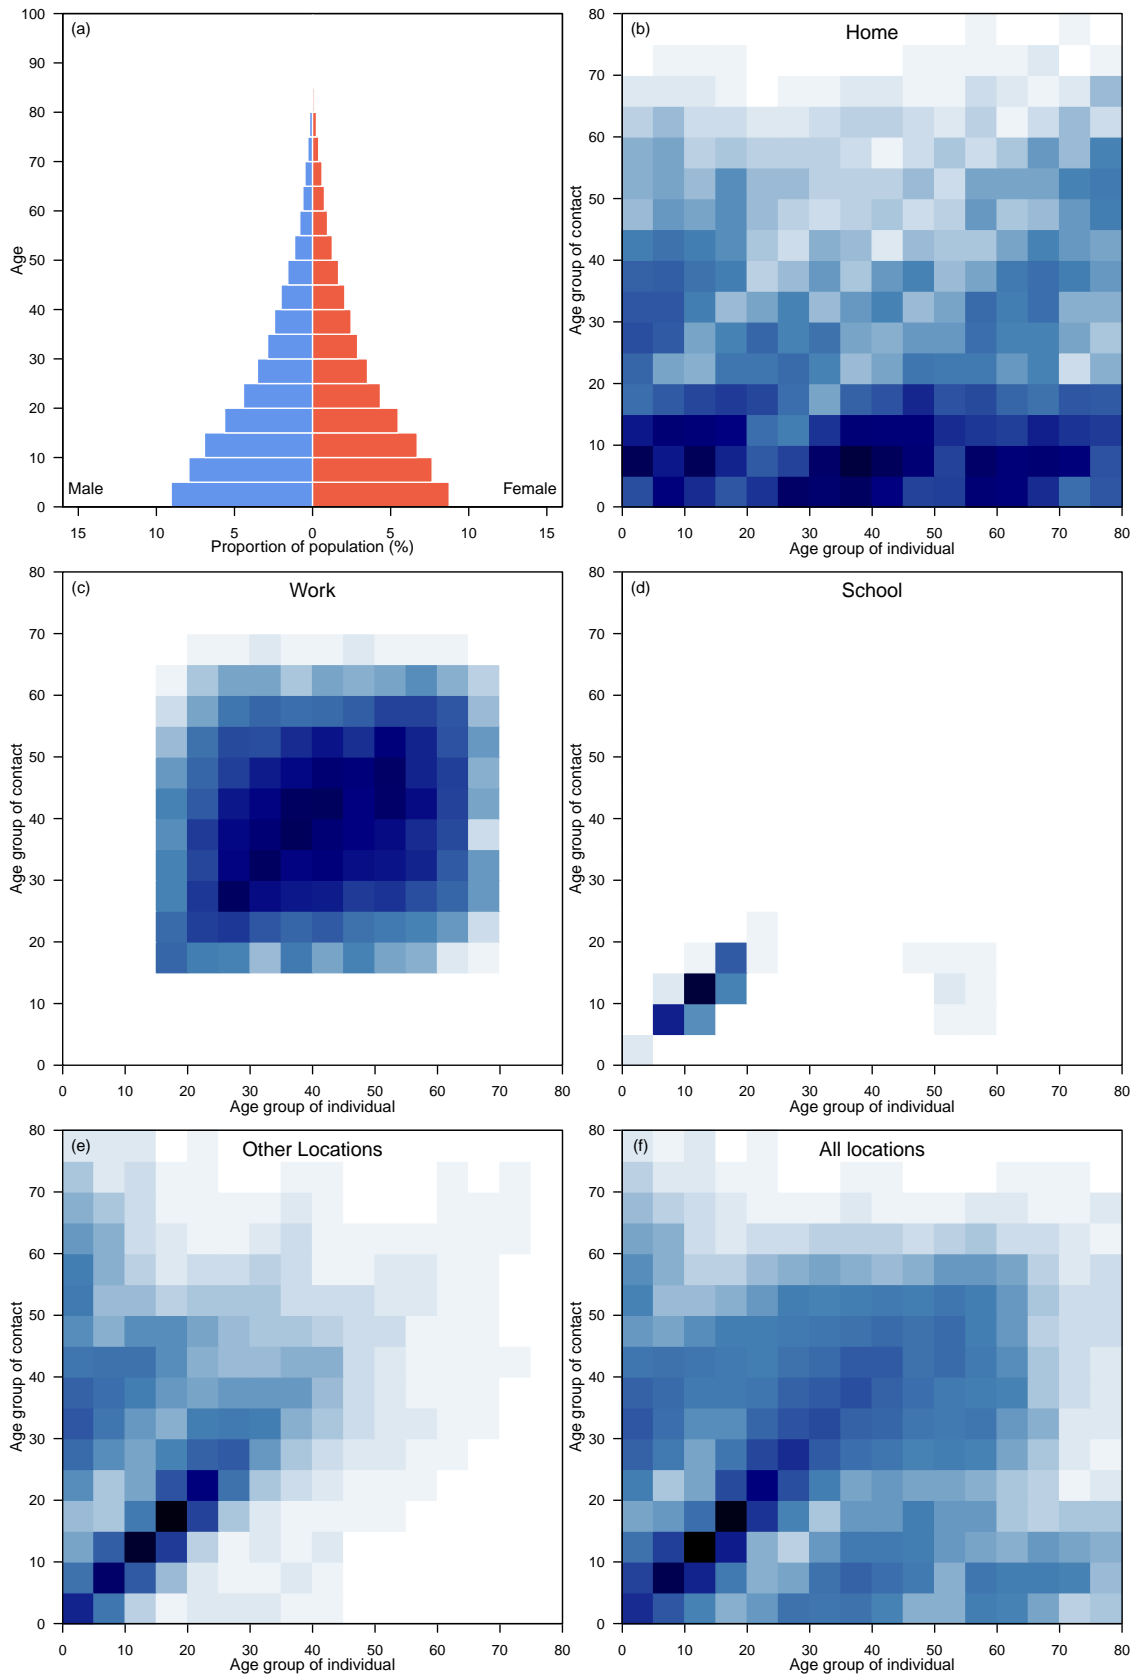

# Malta

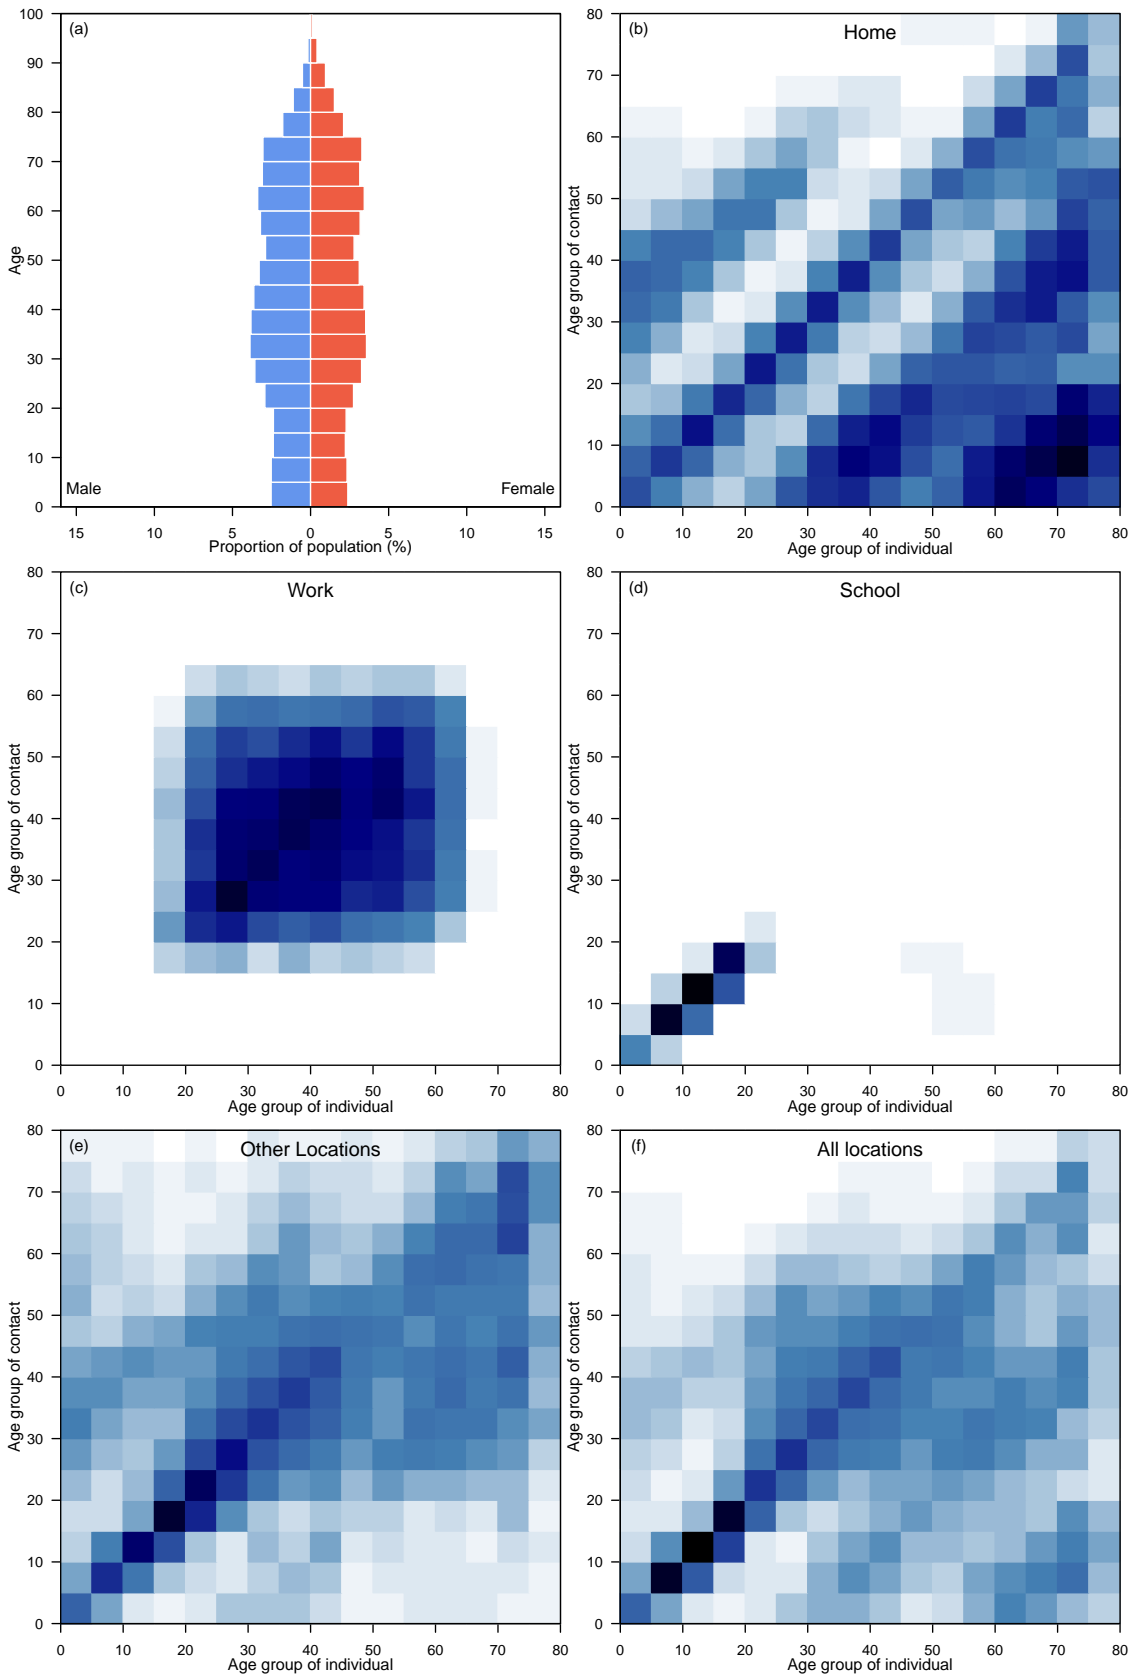

# Mauritania

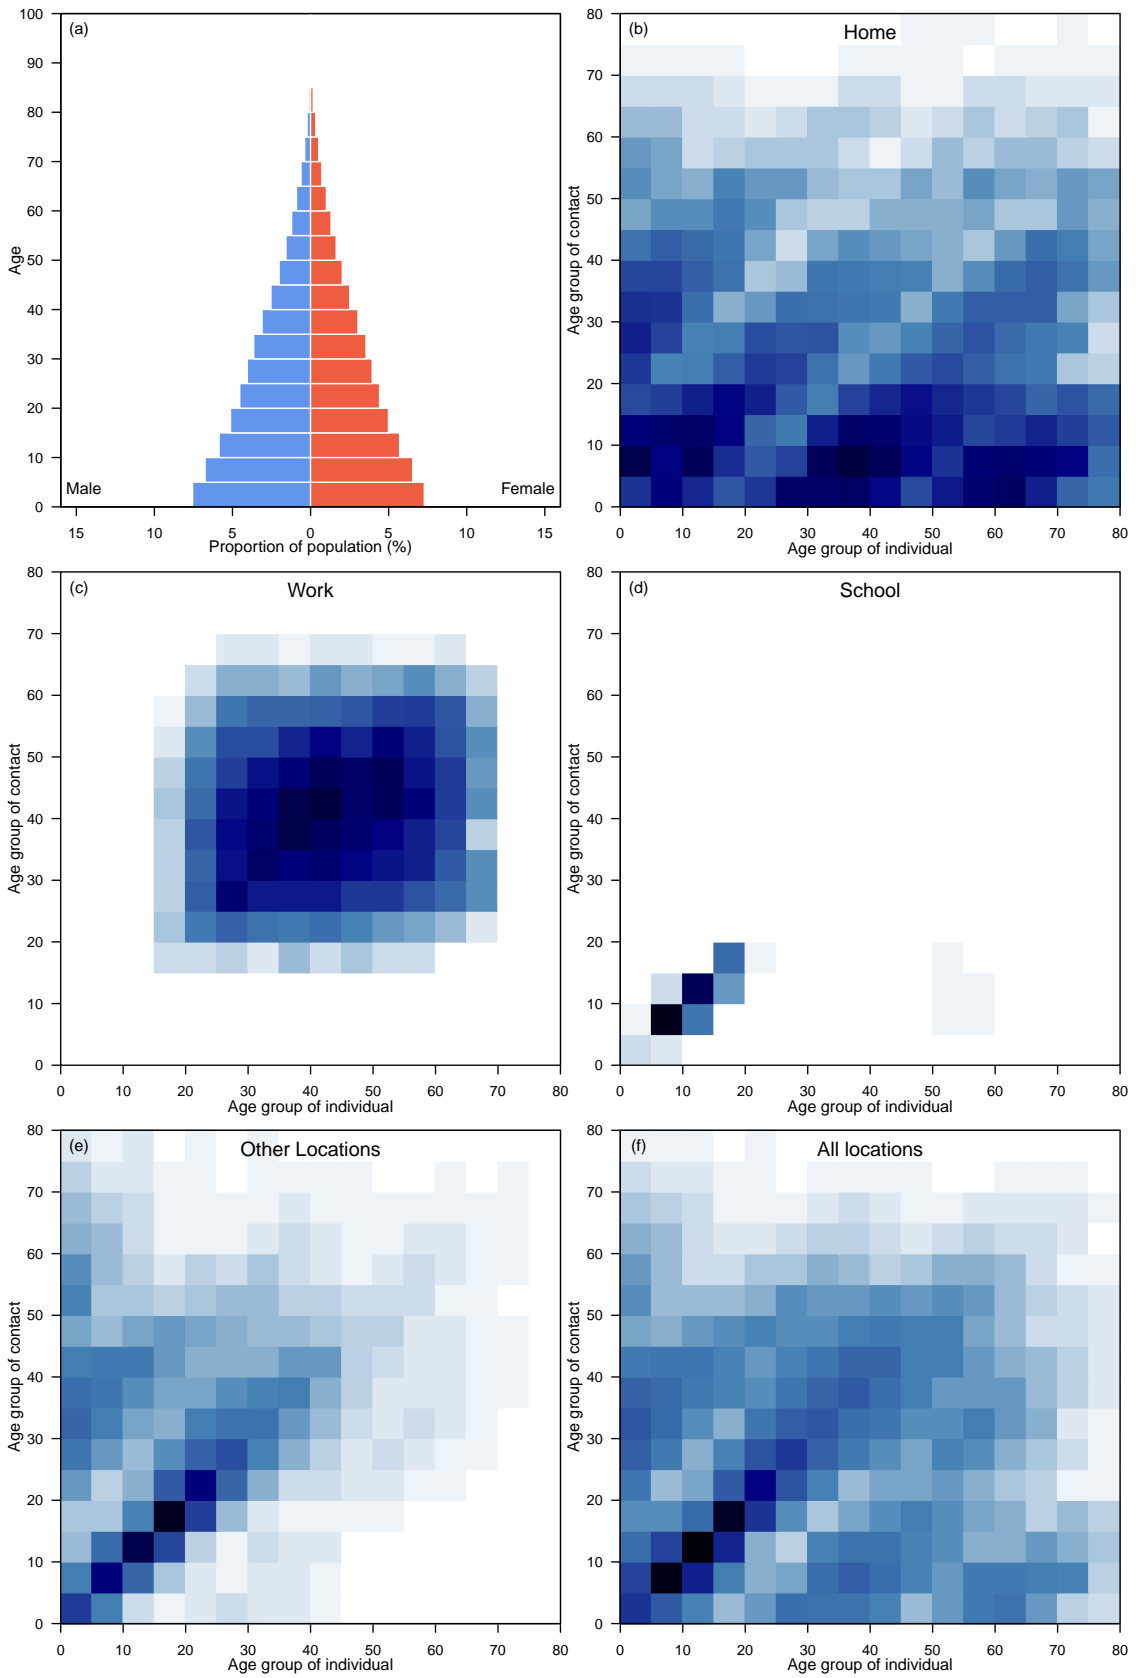

# Mauritius

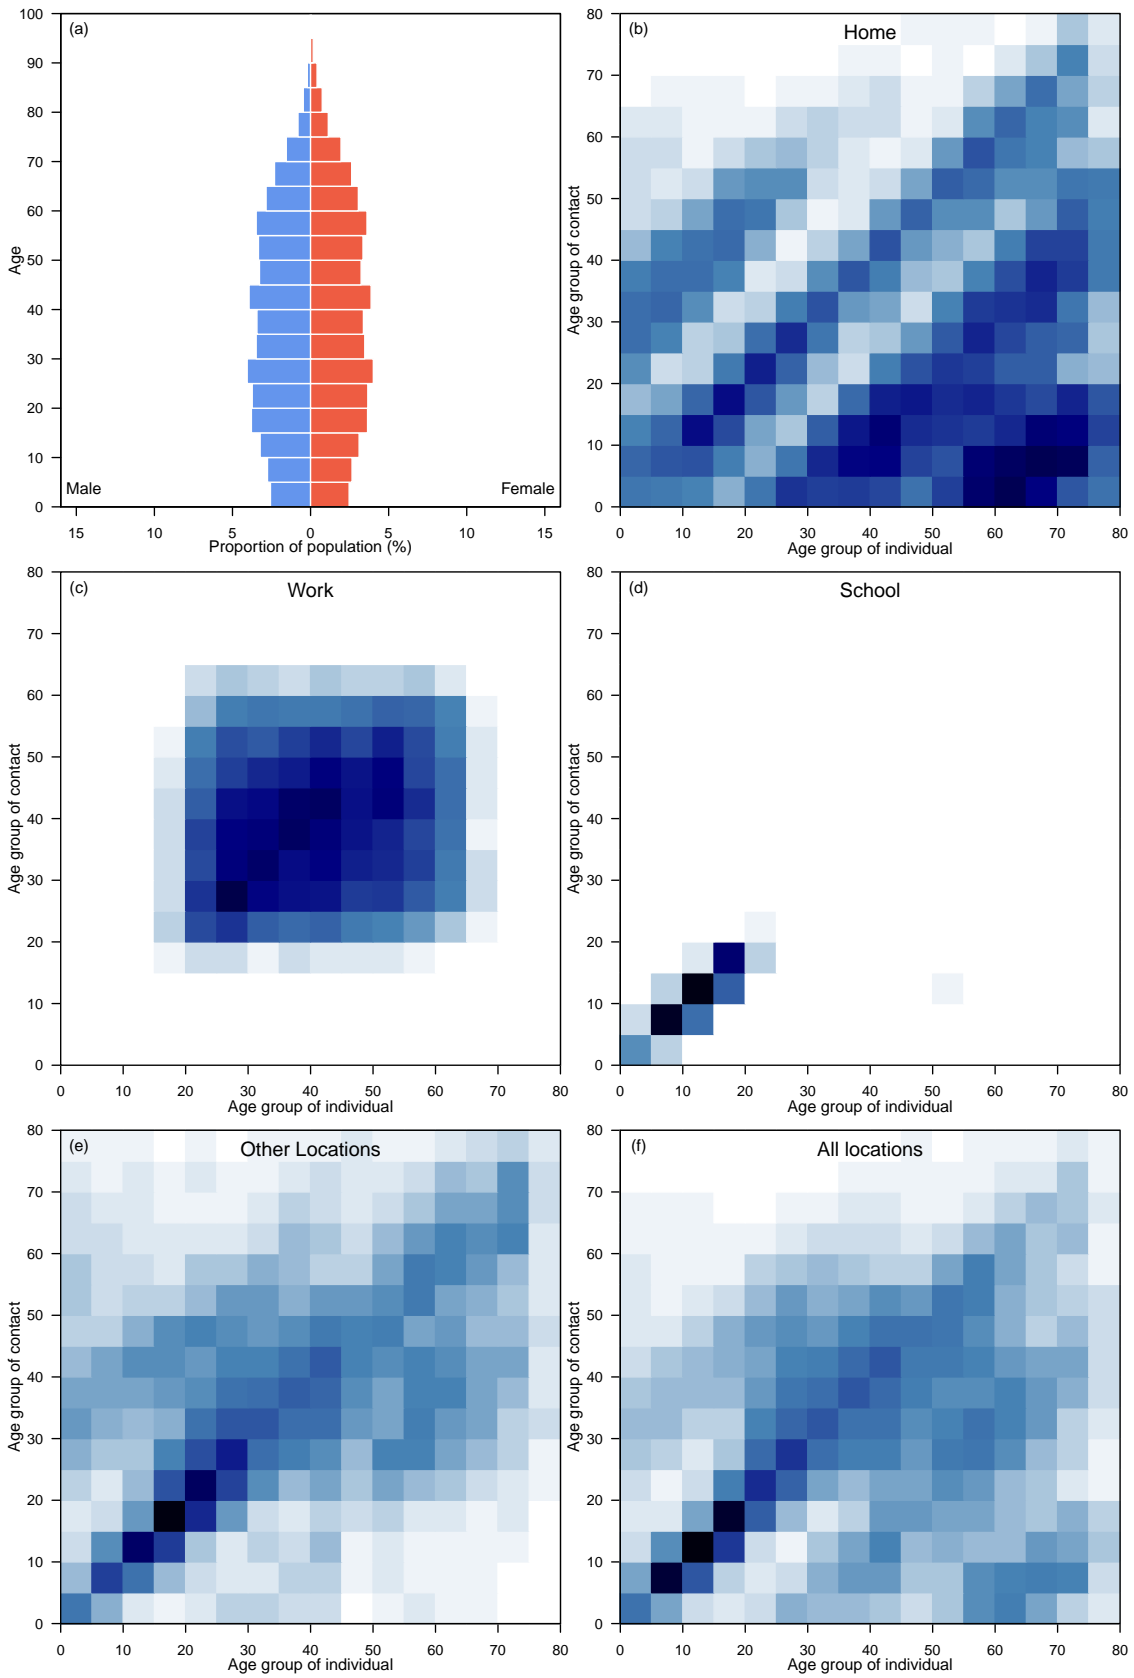

# Mexico

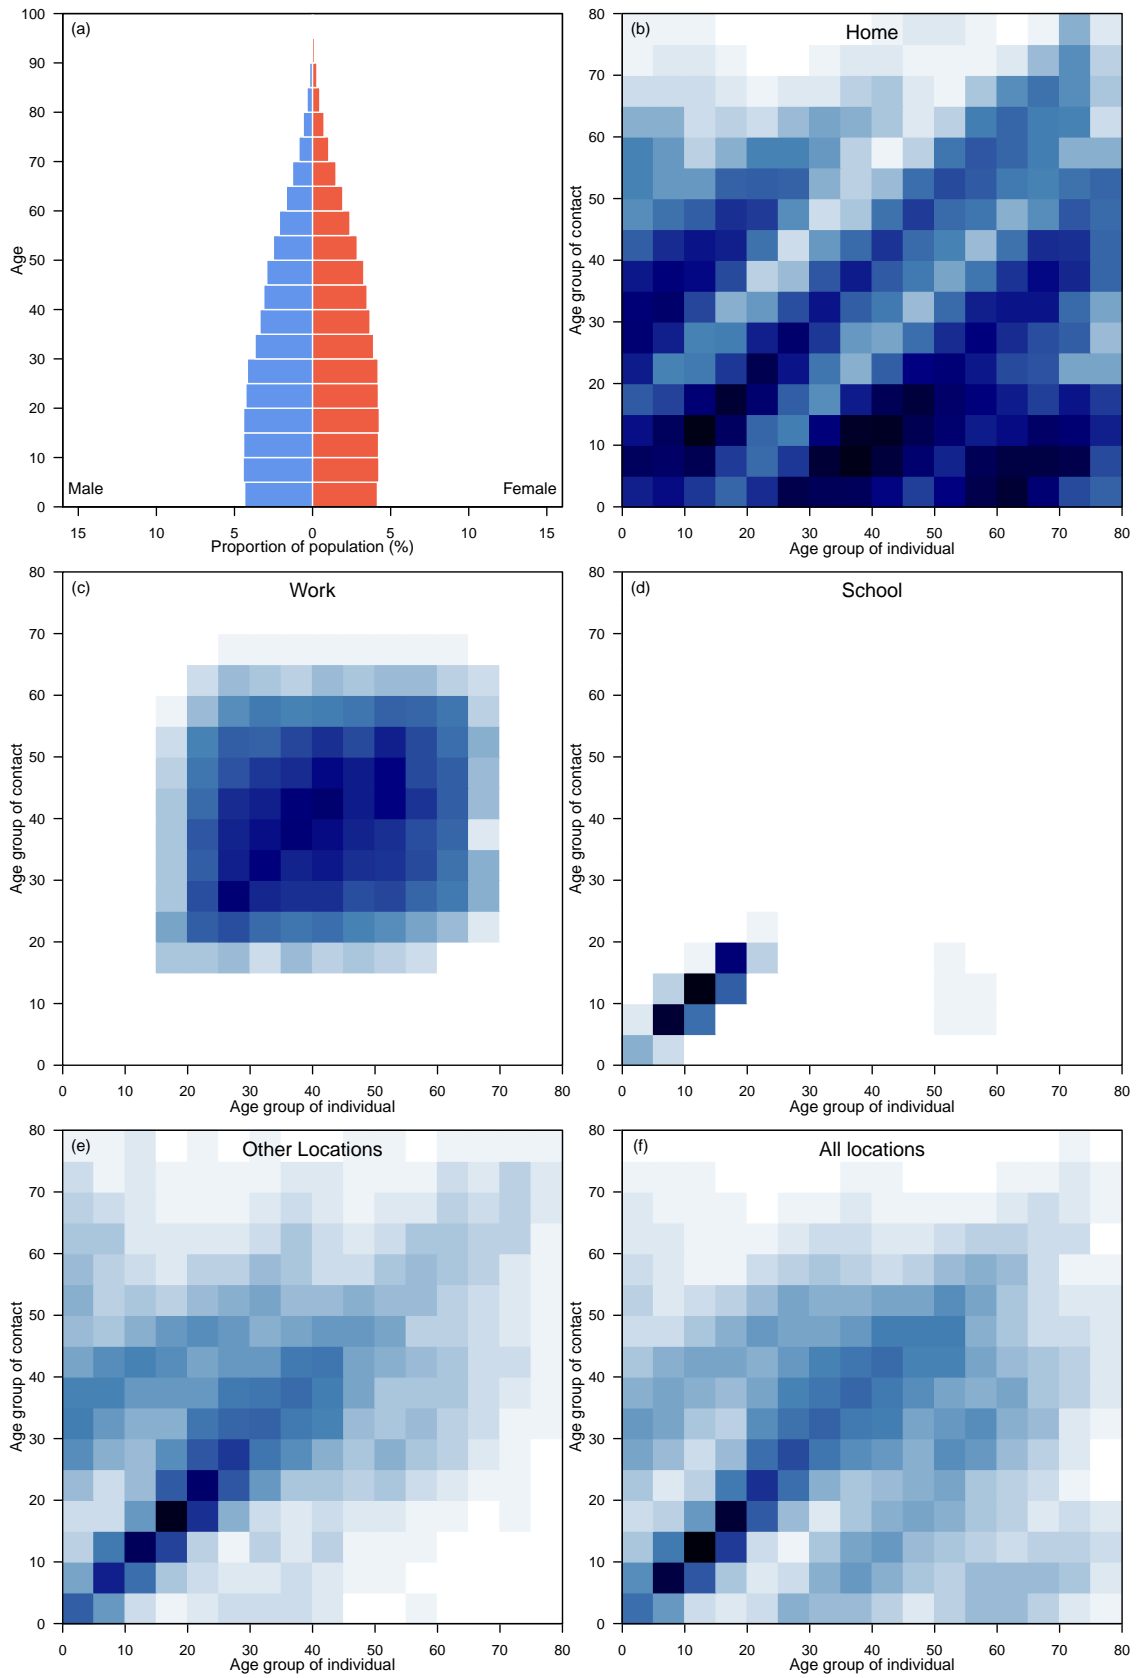

# Mongolia

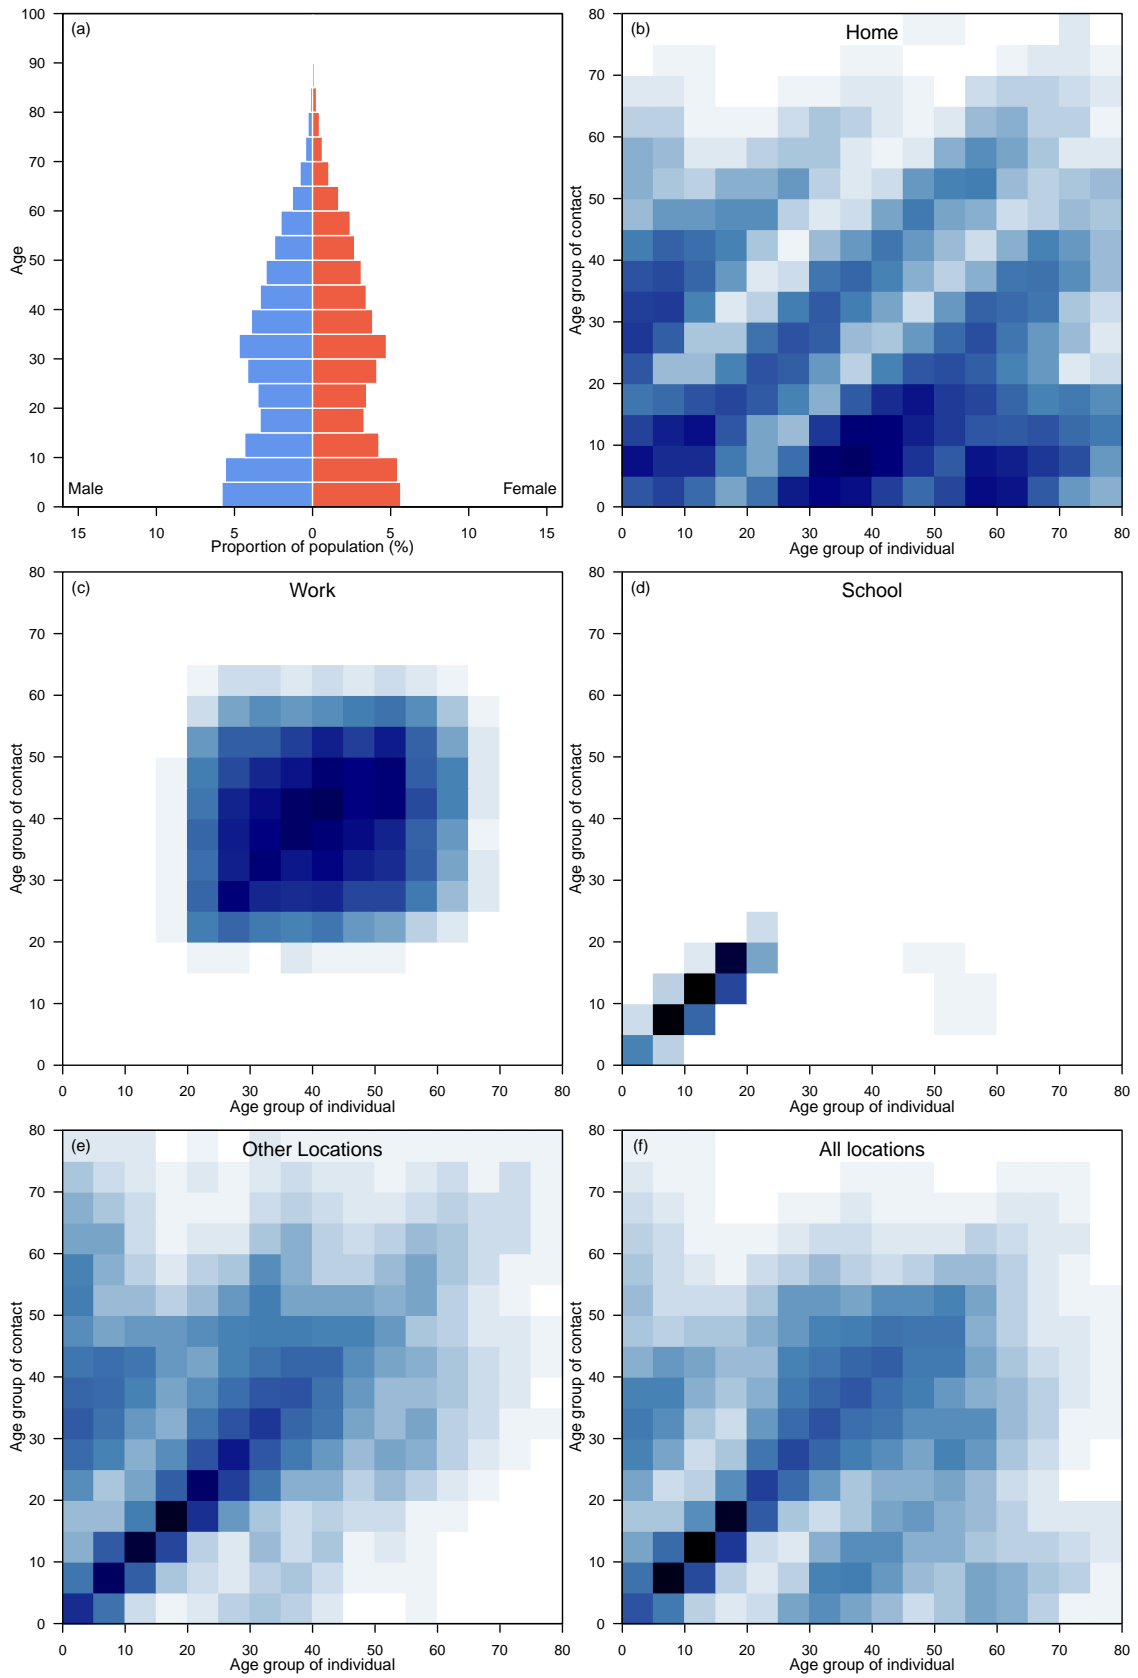

# Montenegro

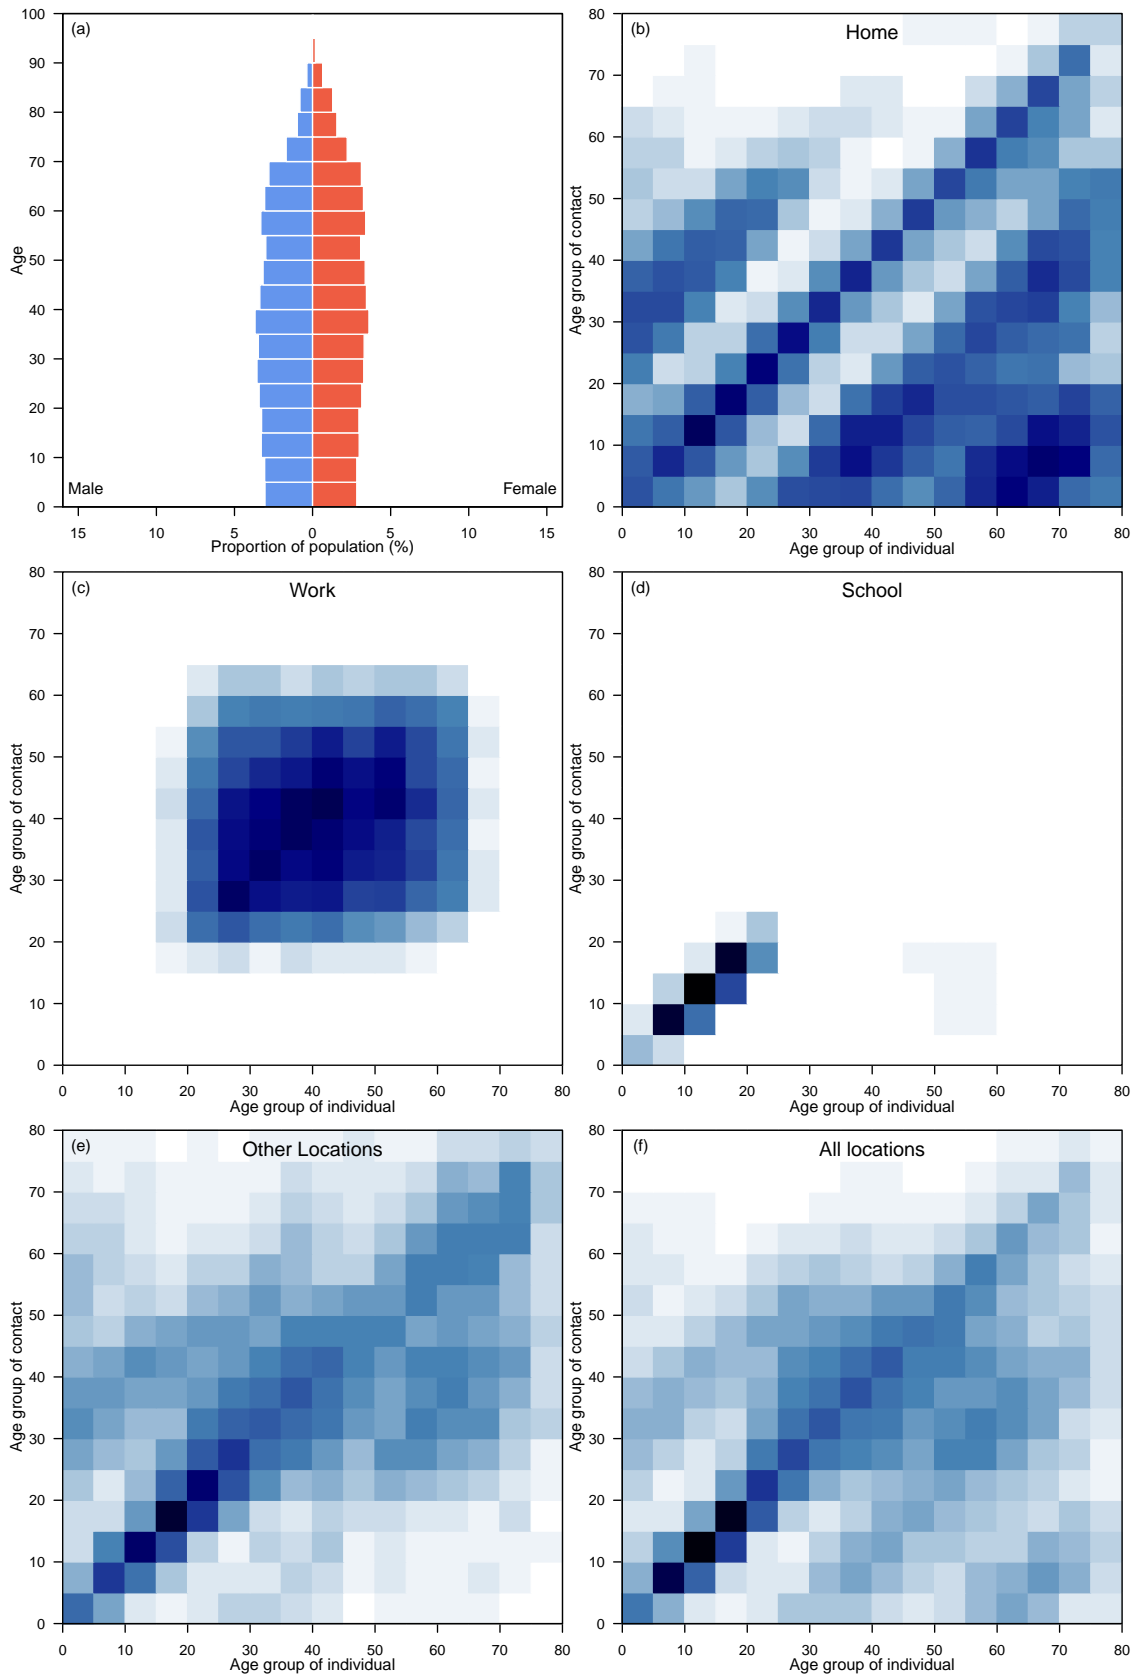

# Morocco

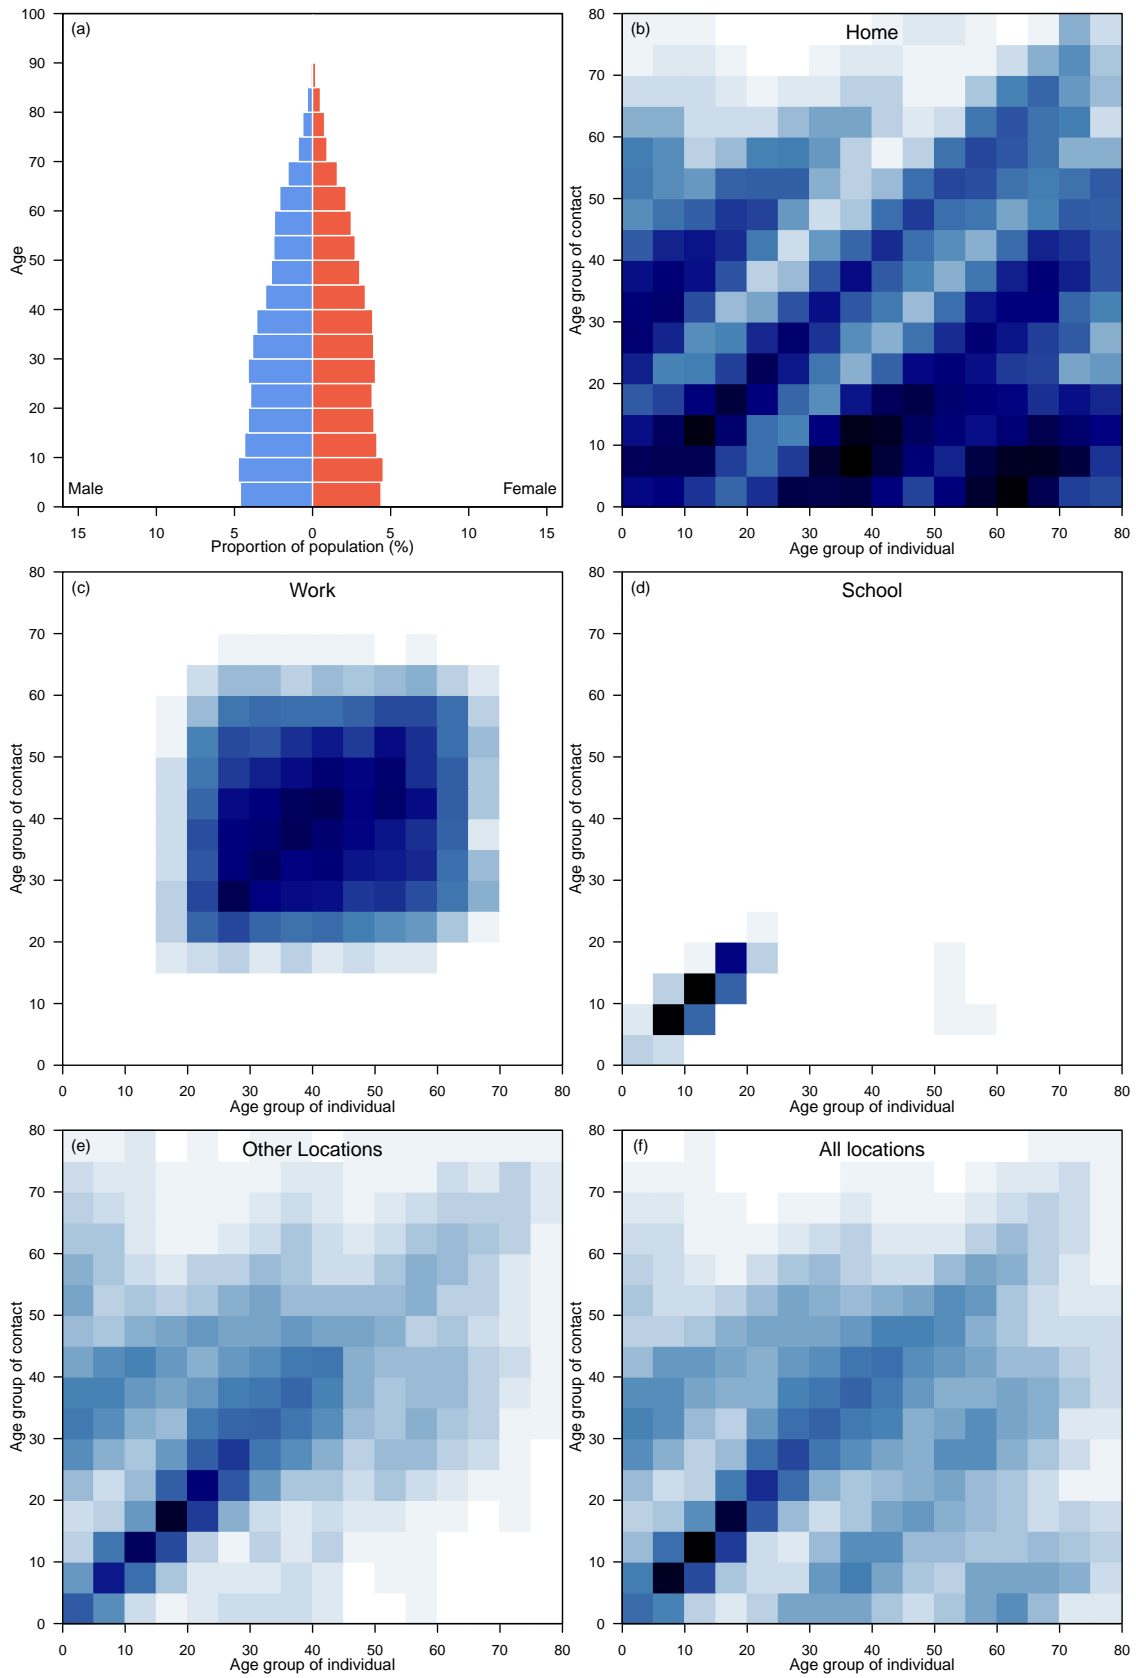



# Mozambique

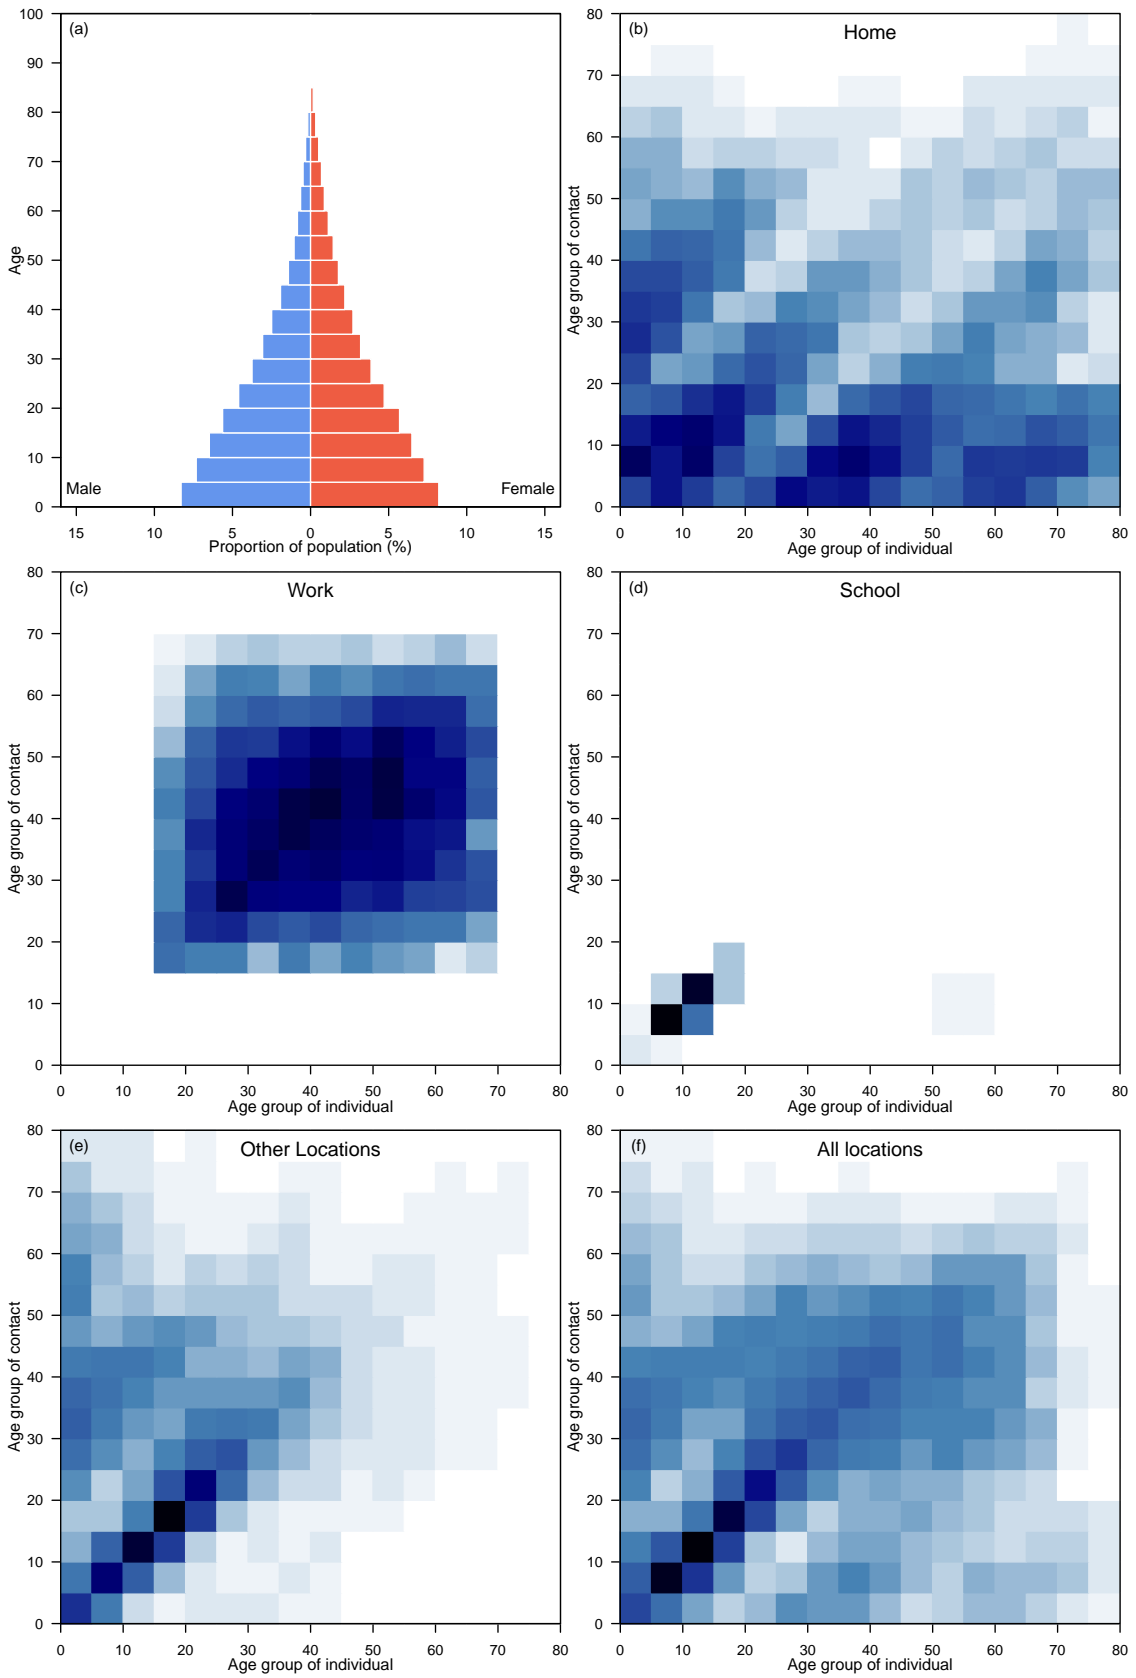

# Myanmar

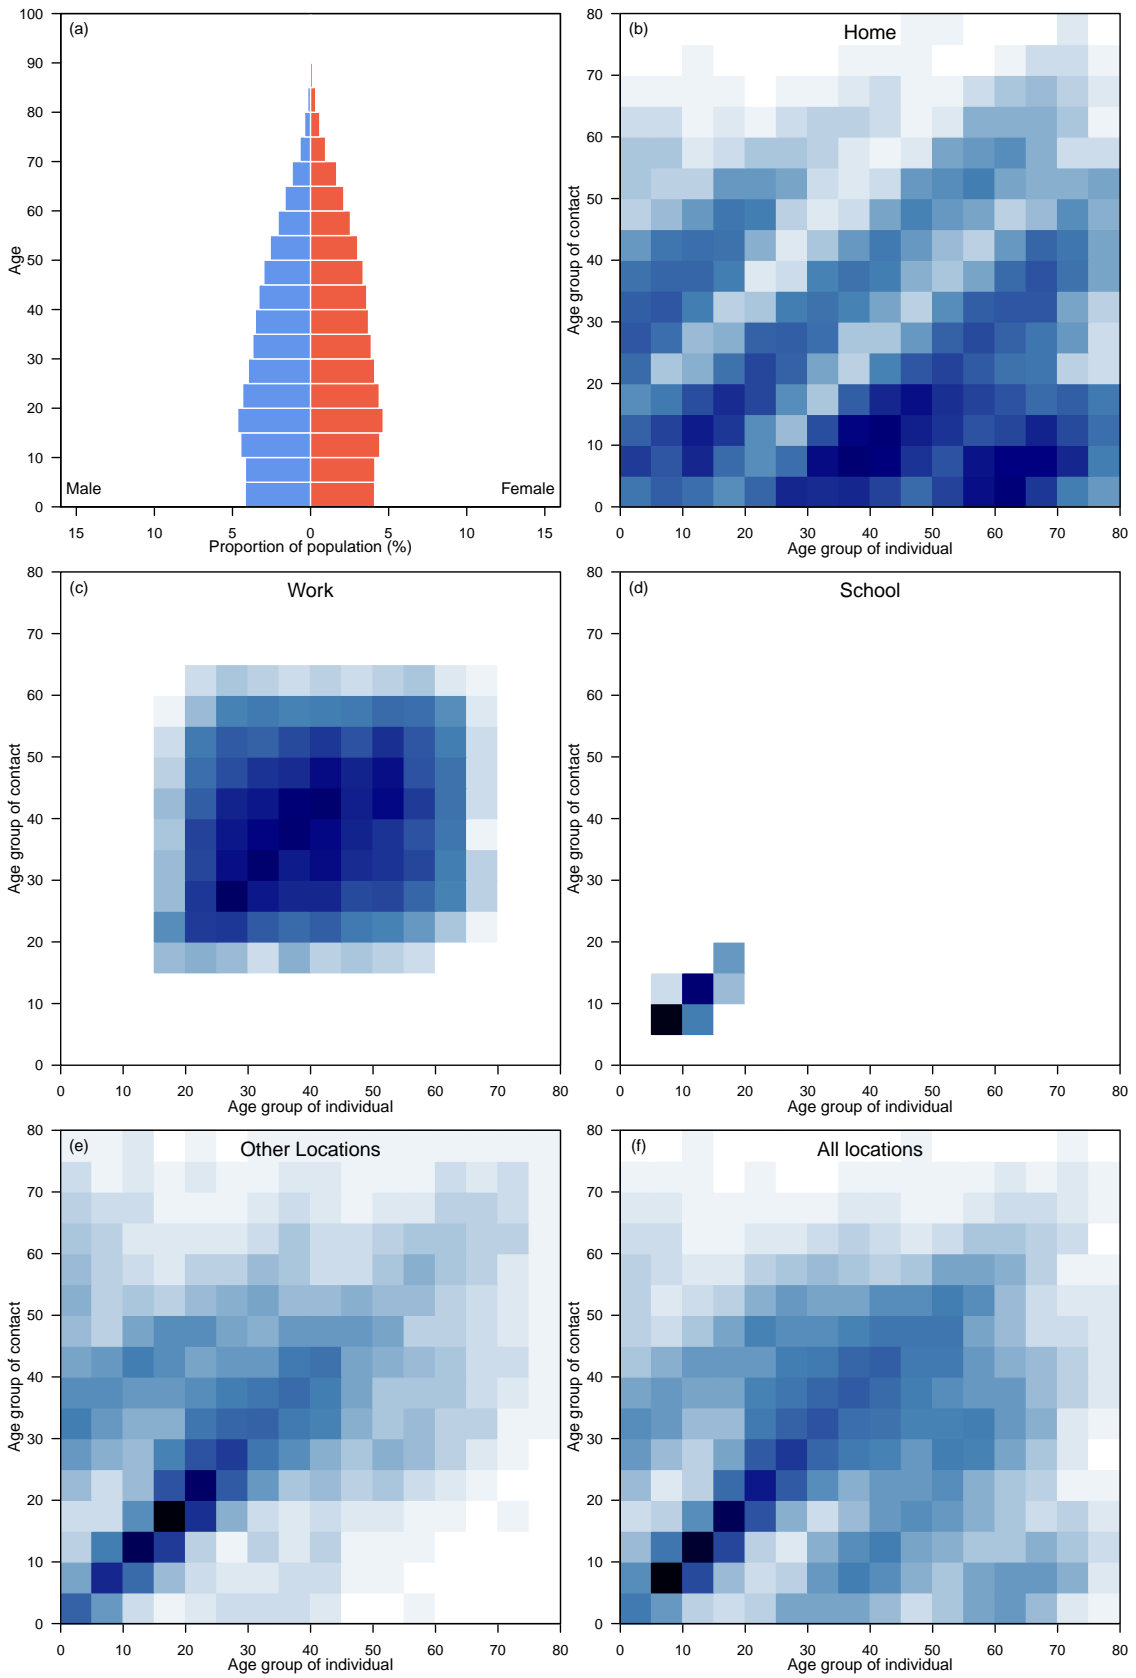

# Namibia

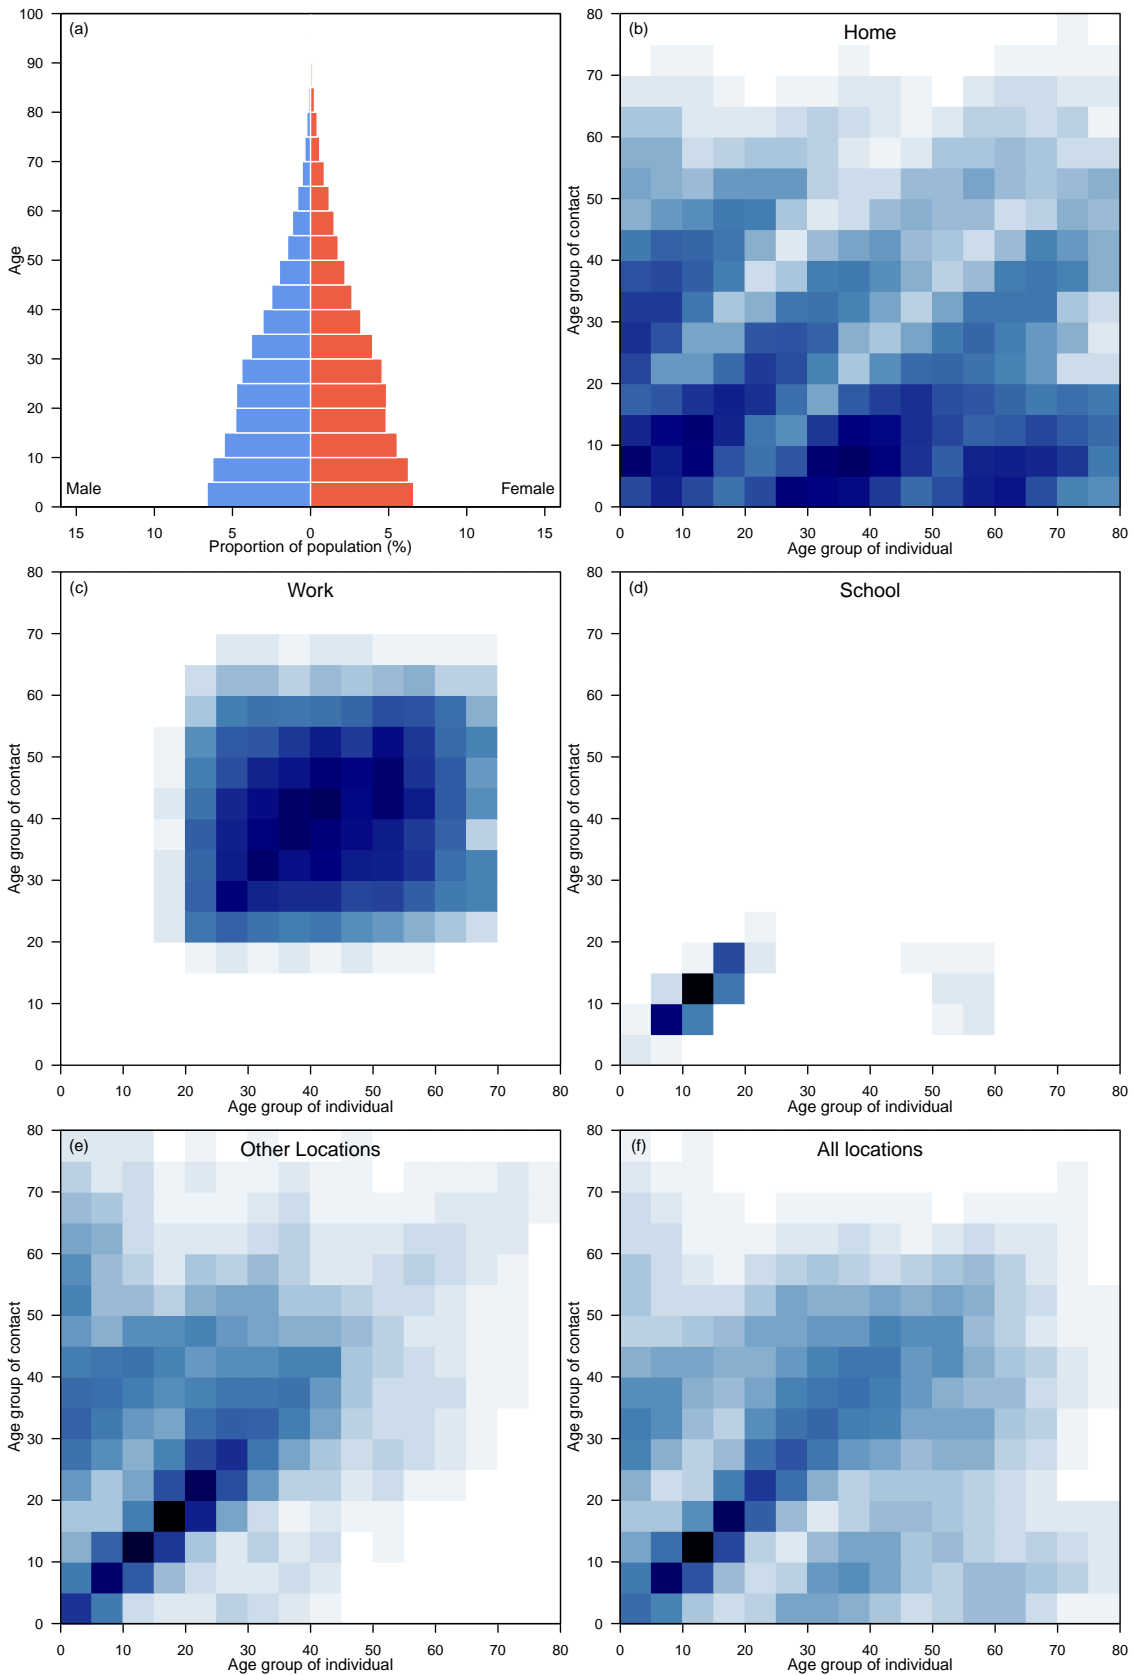

# Nepal

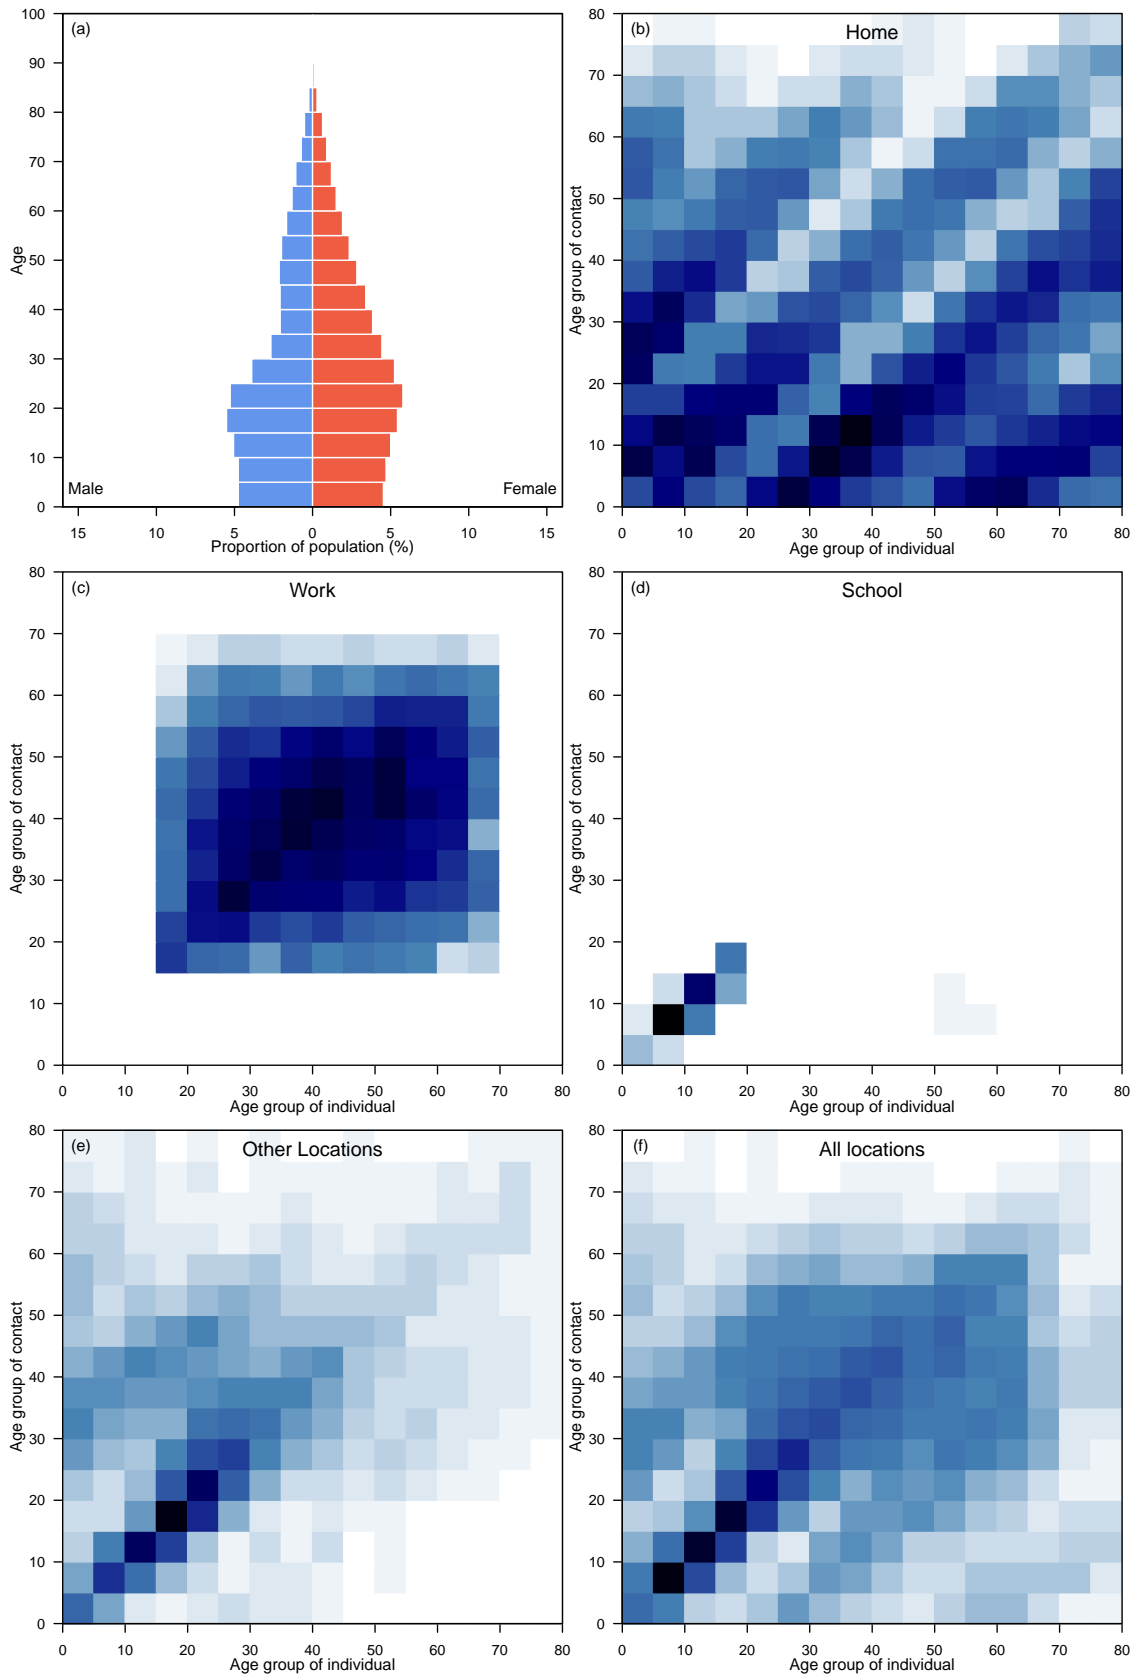

# Netherlands

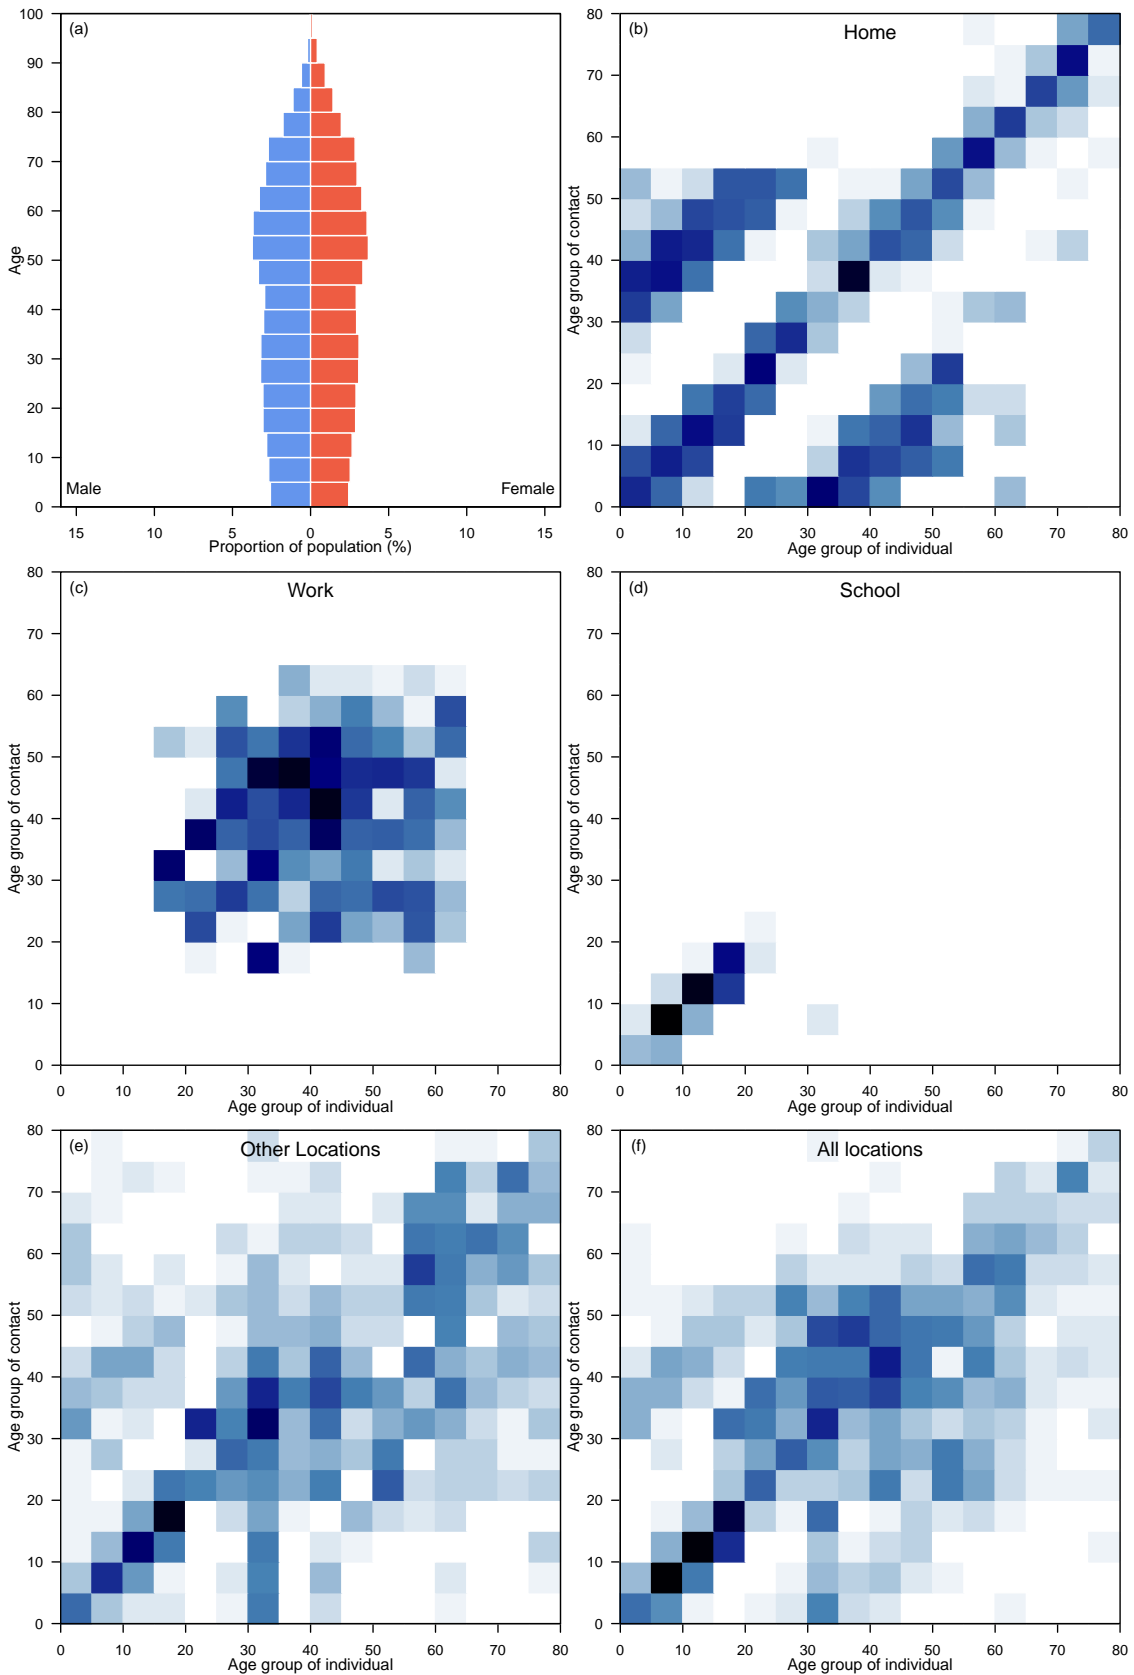

# New Zealand

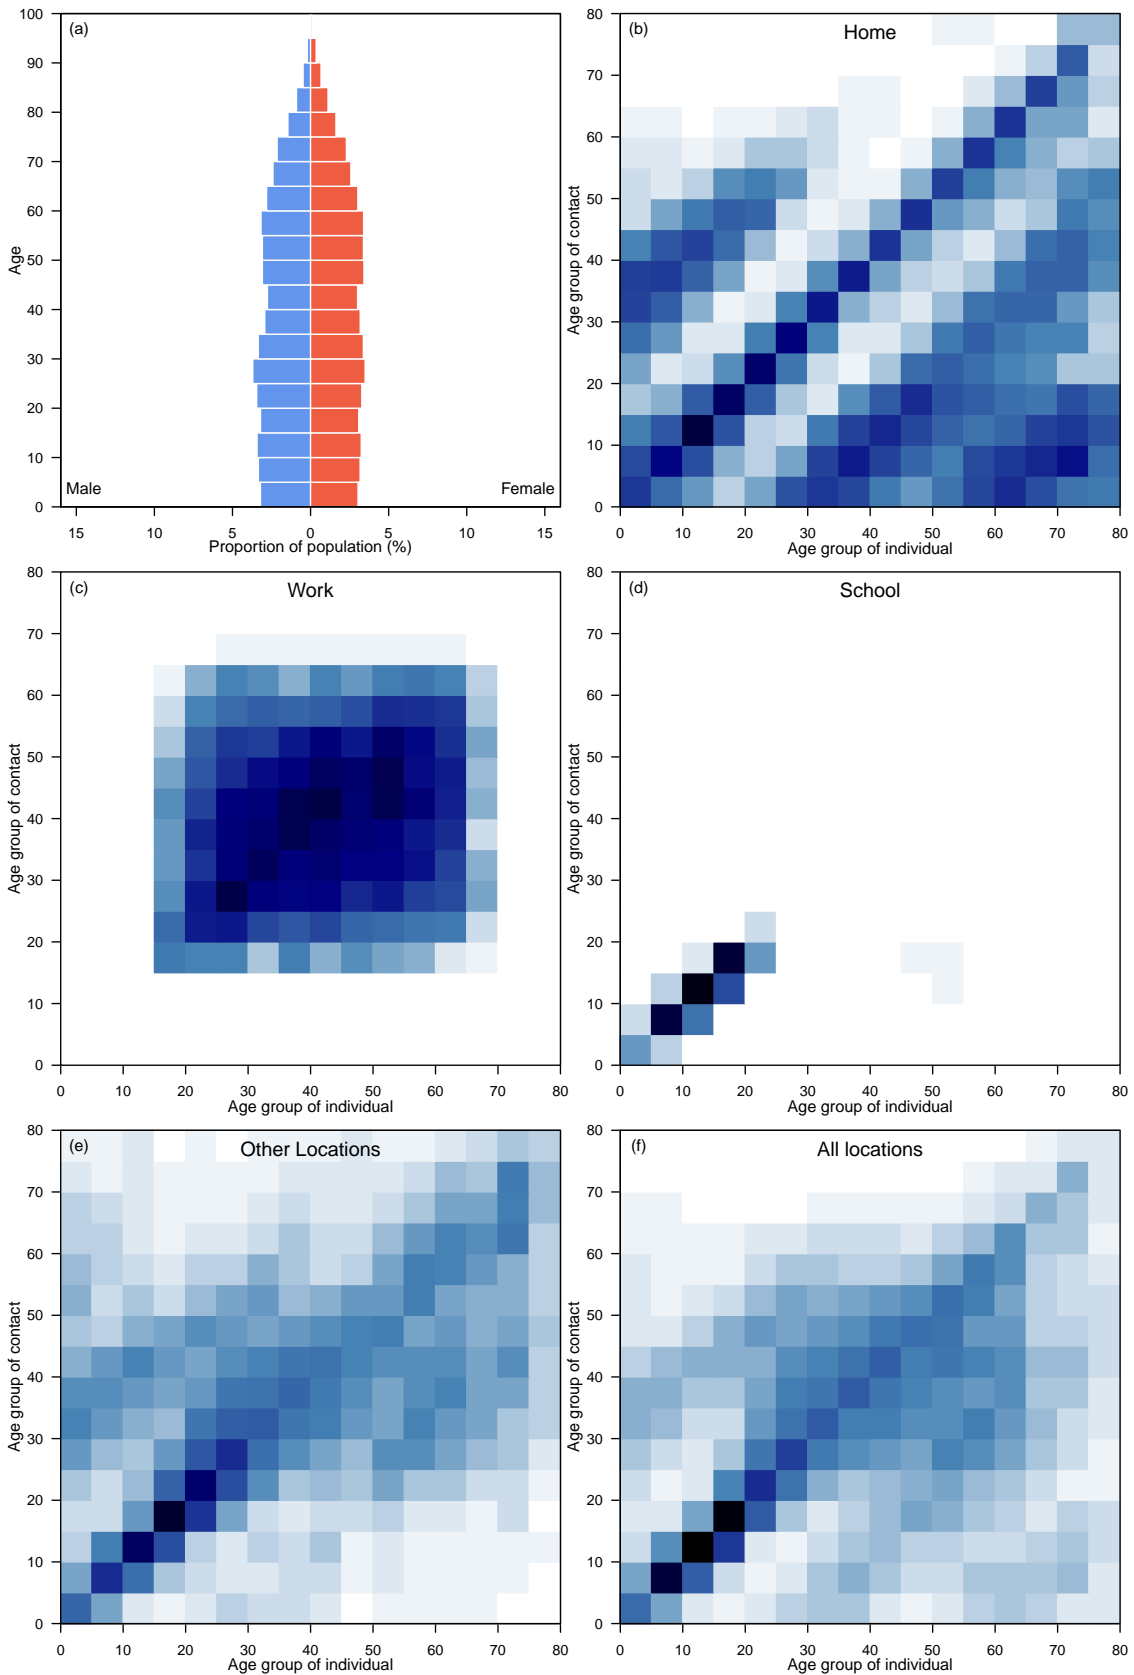

# Nicaragua

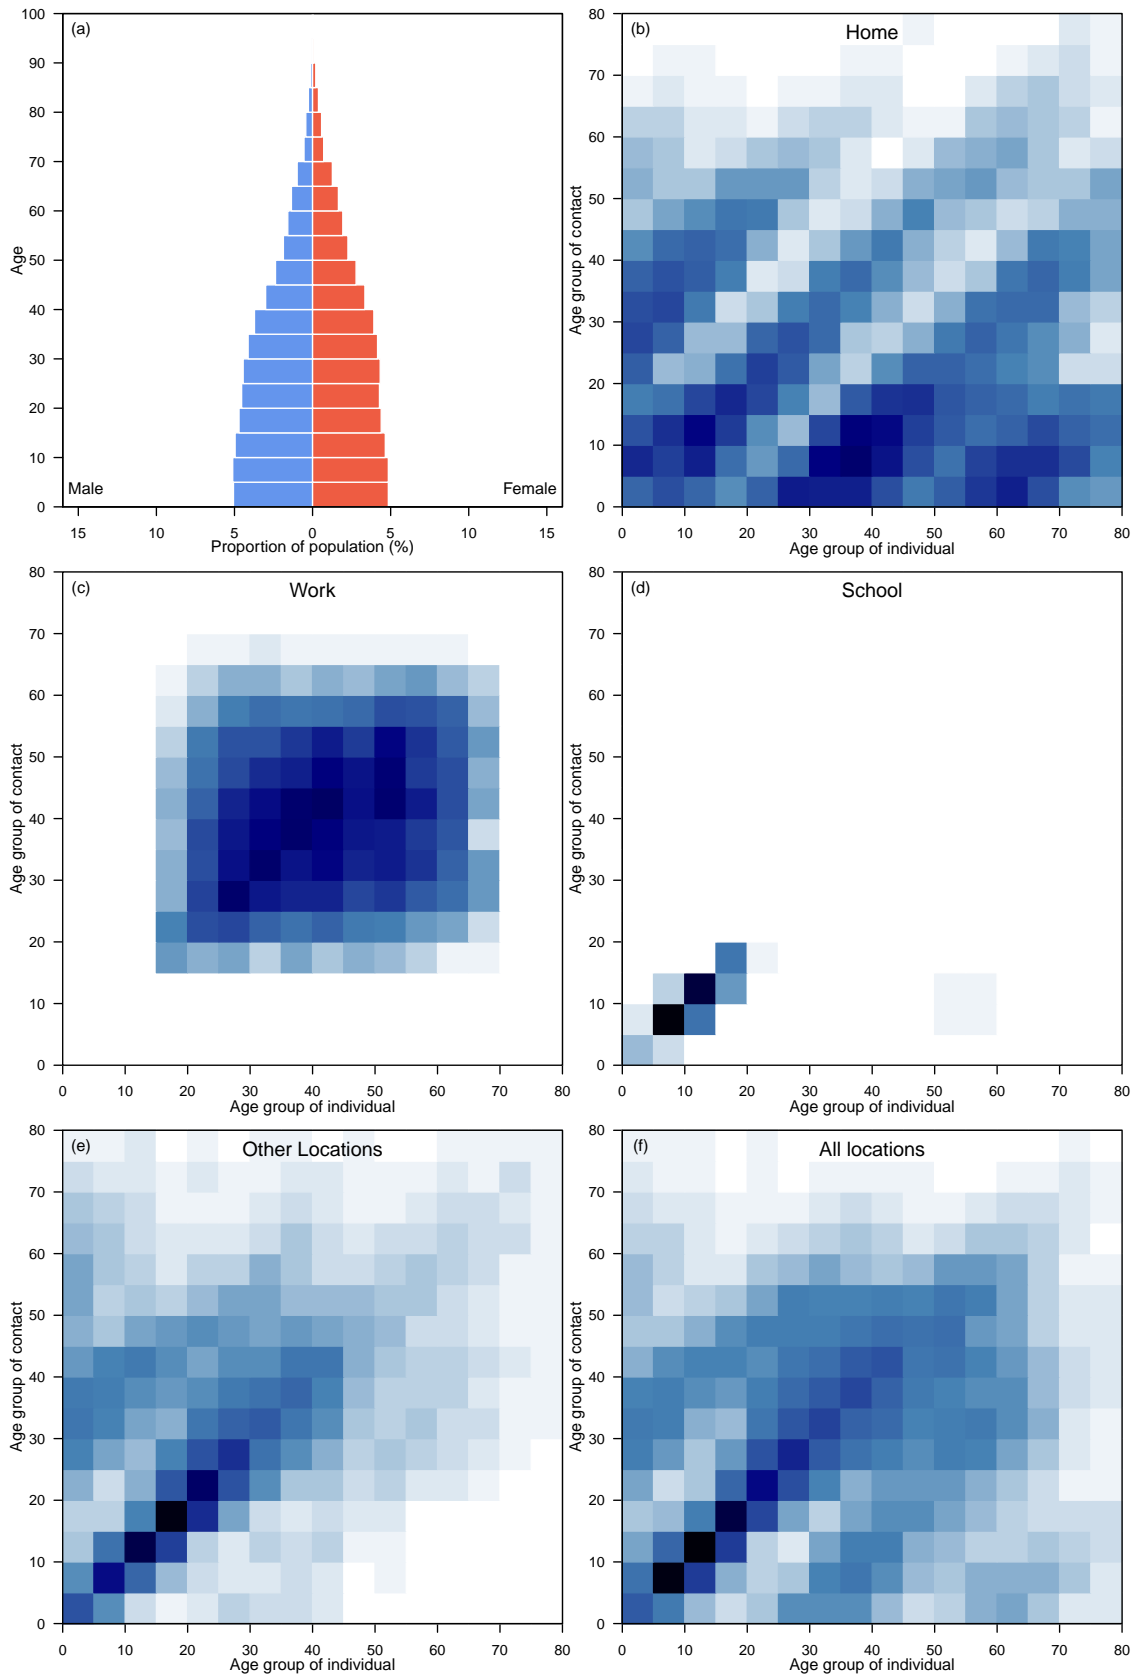

# Niger

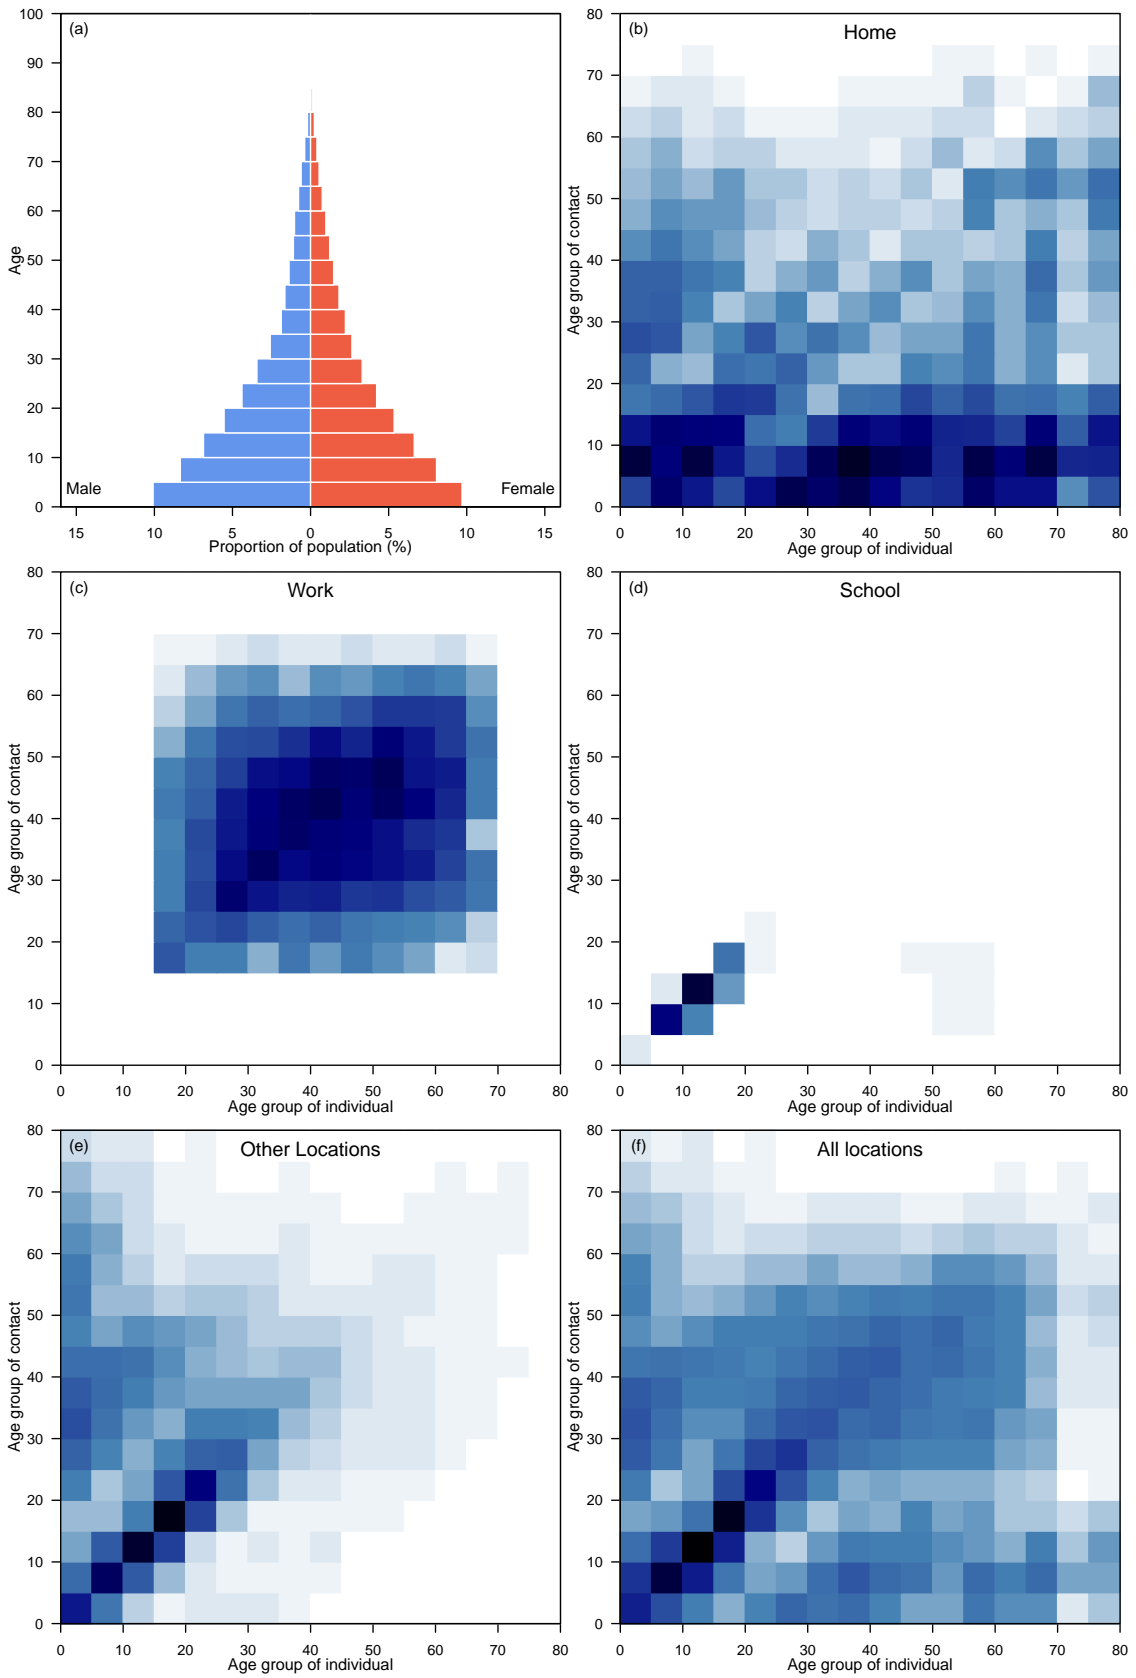



# Nigeria

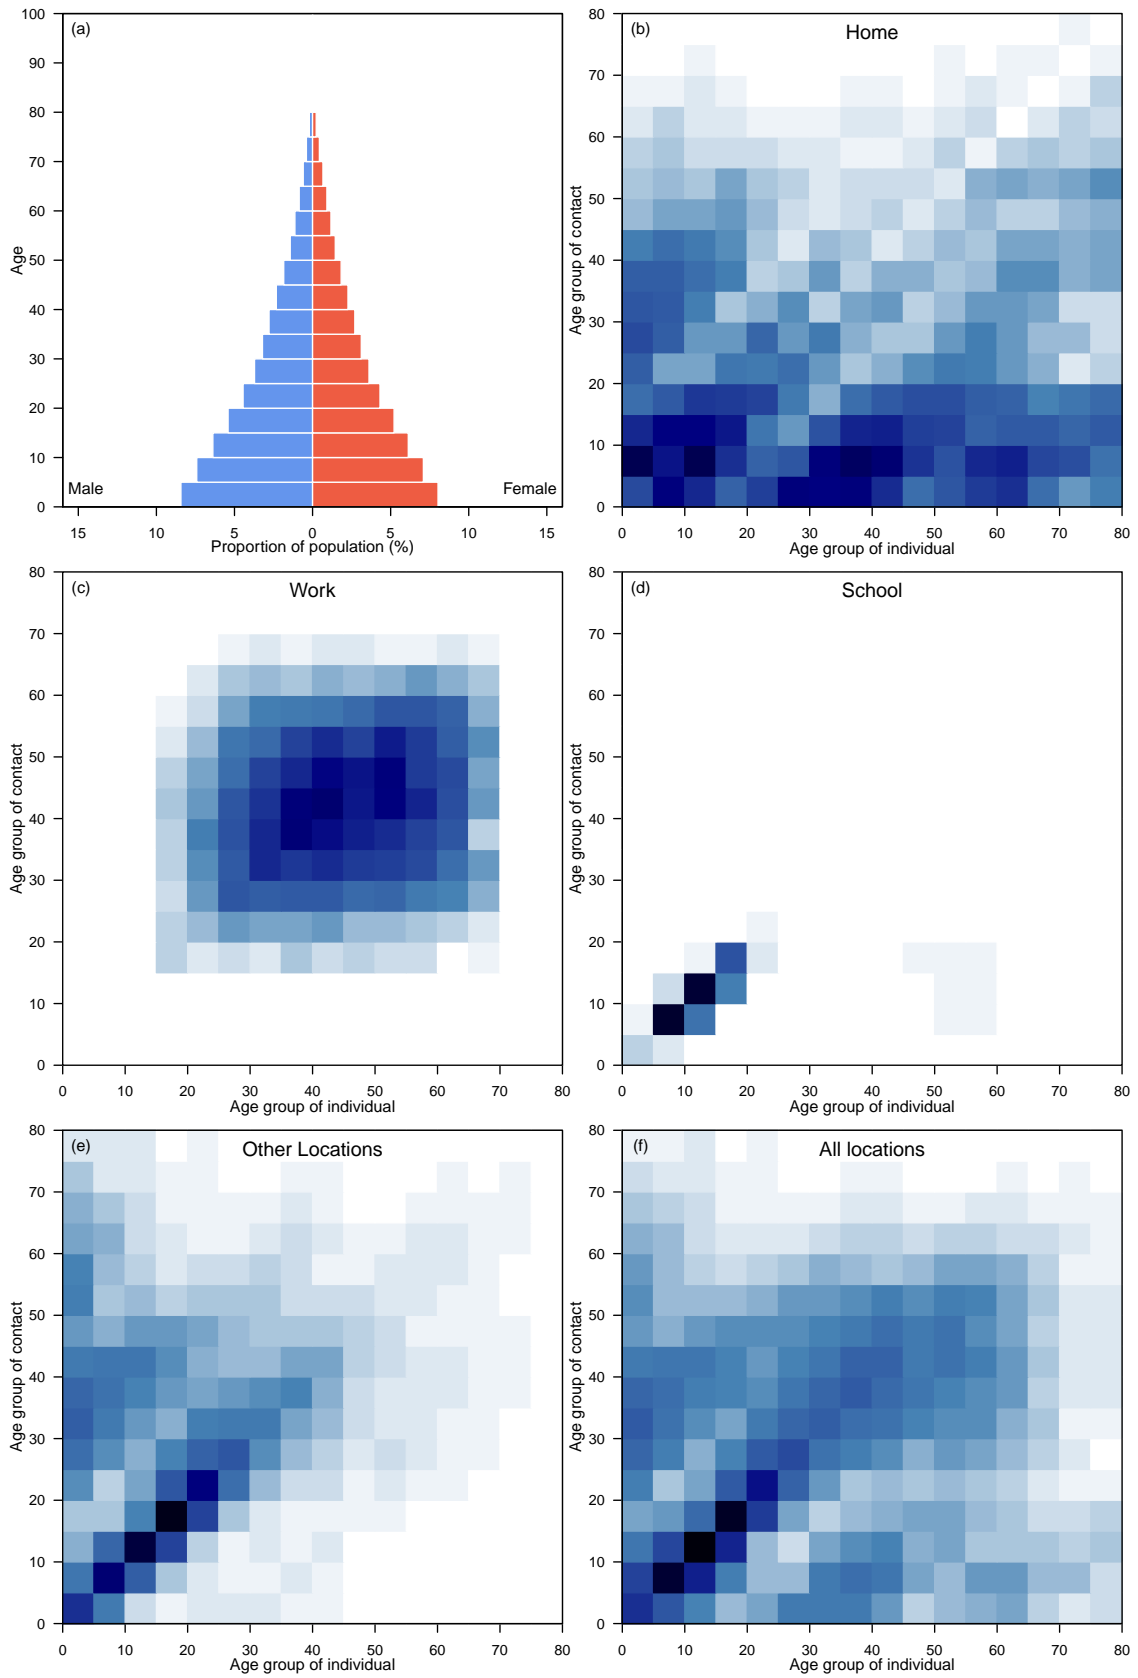

# North Macedonia

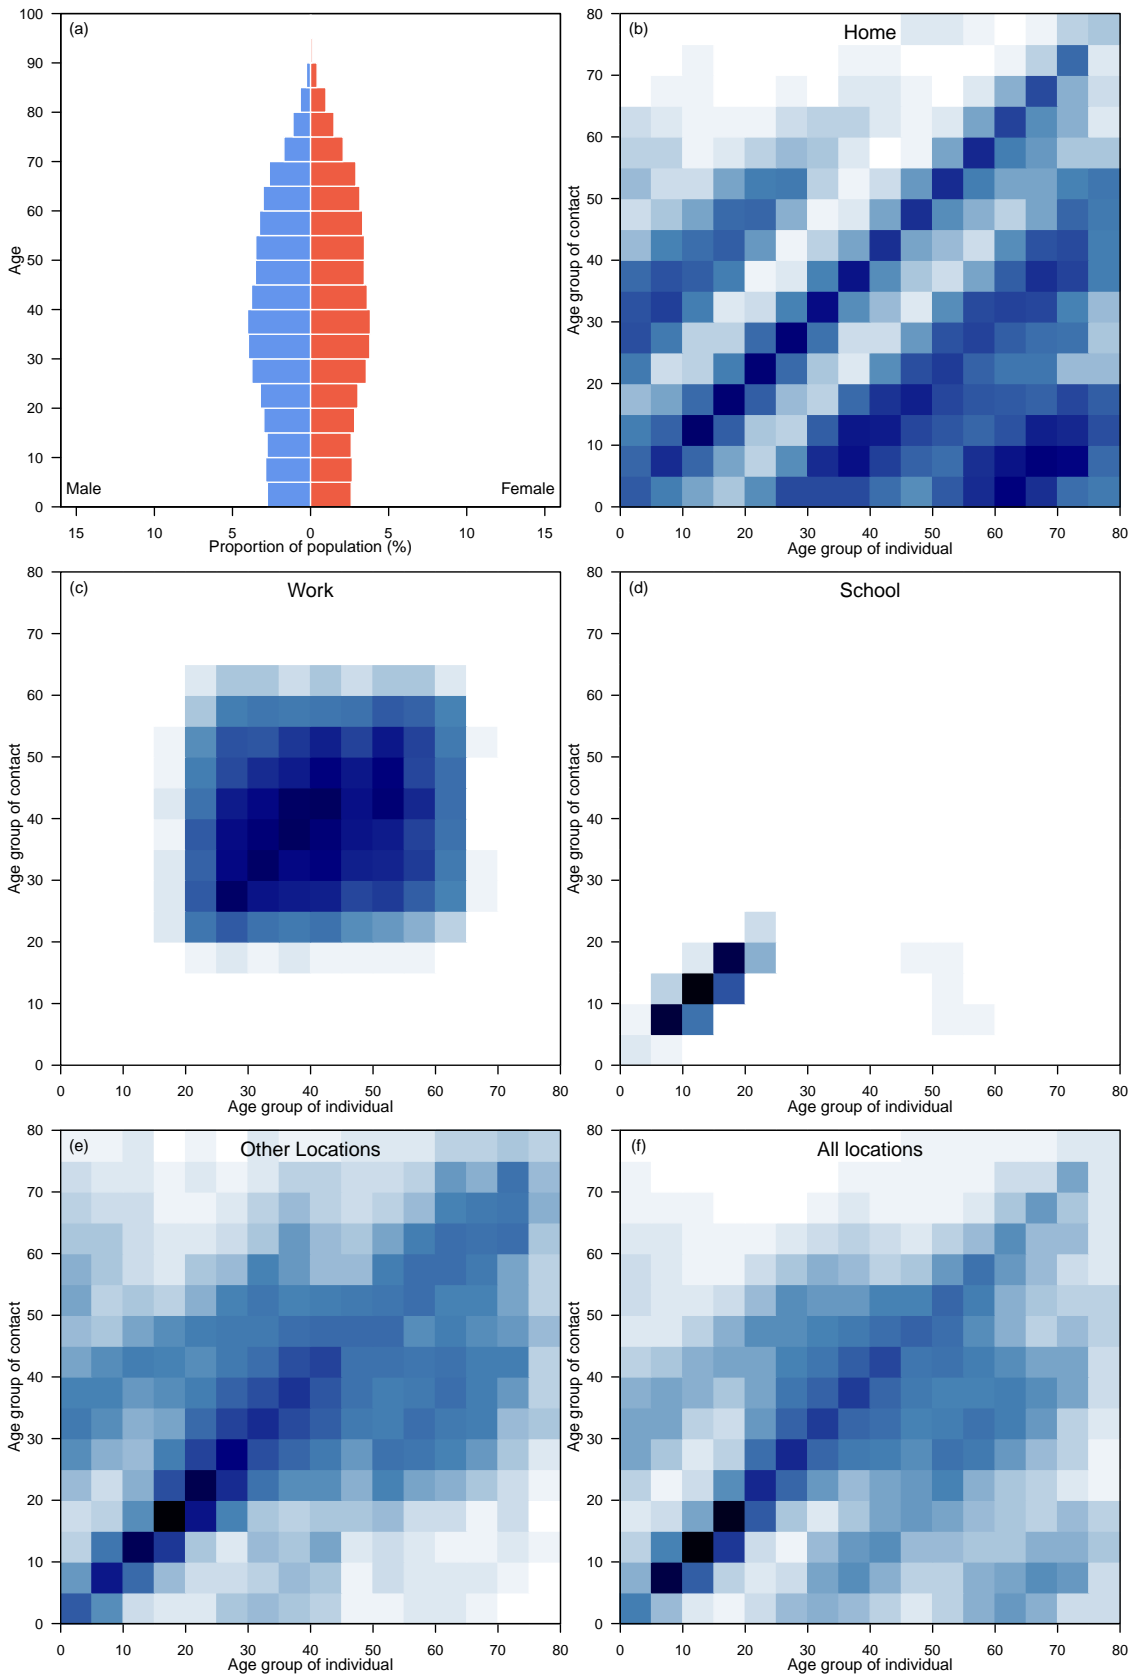

# Norway

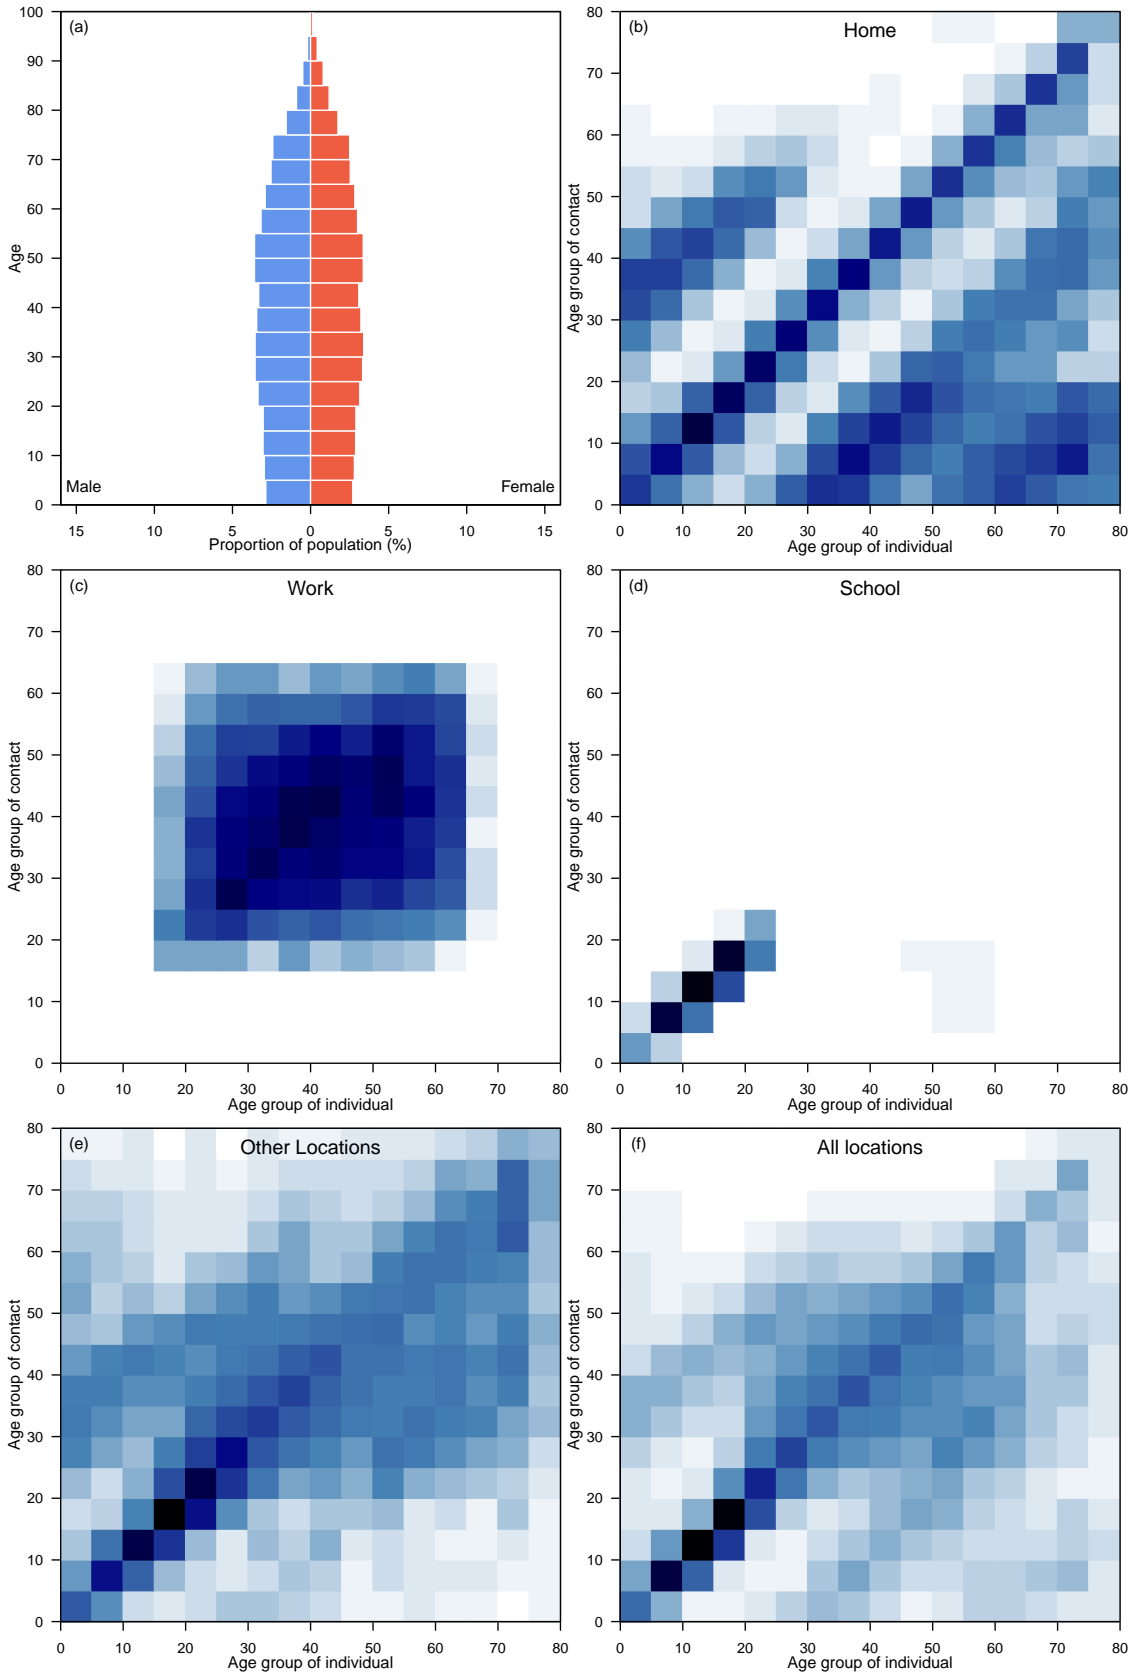

# Oman

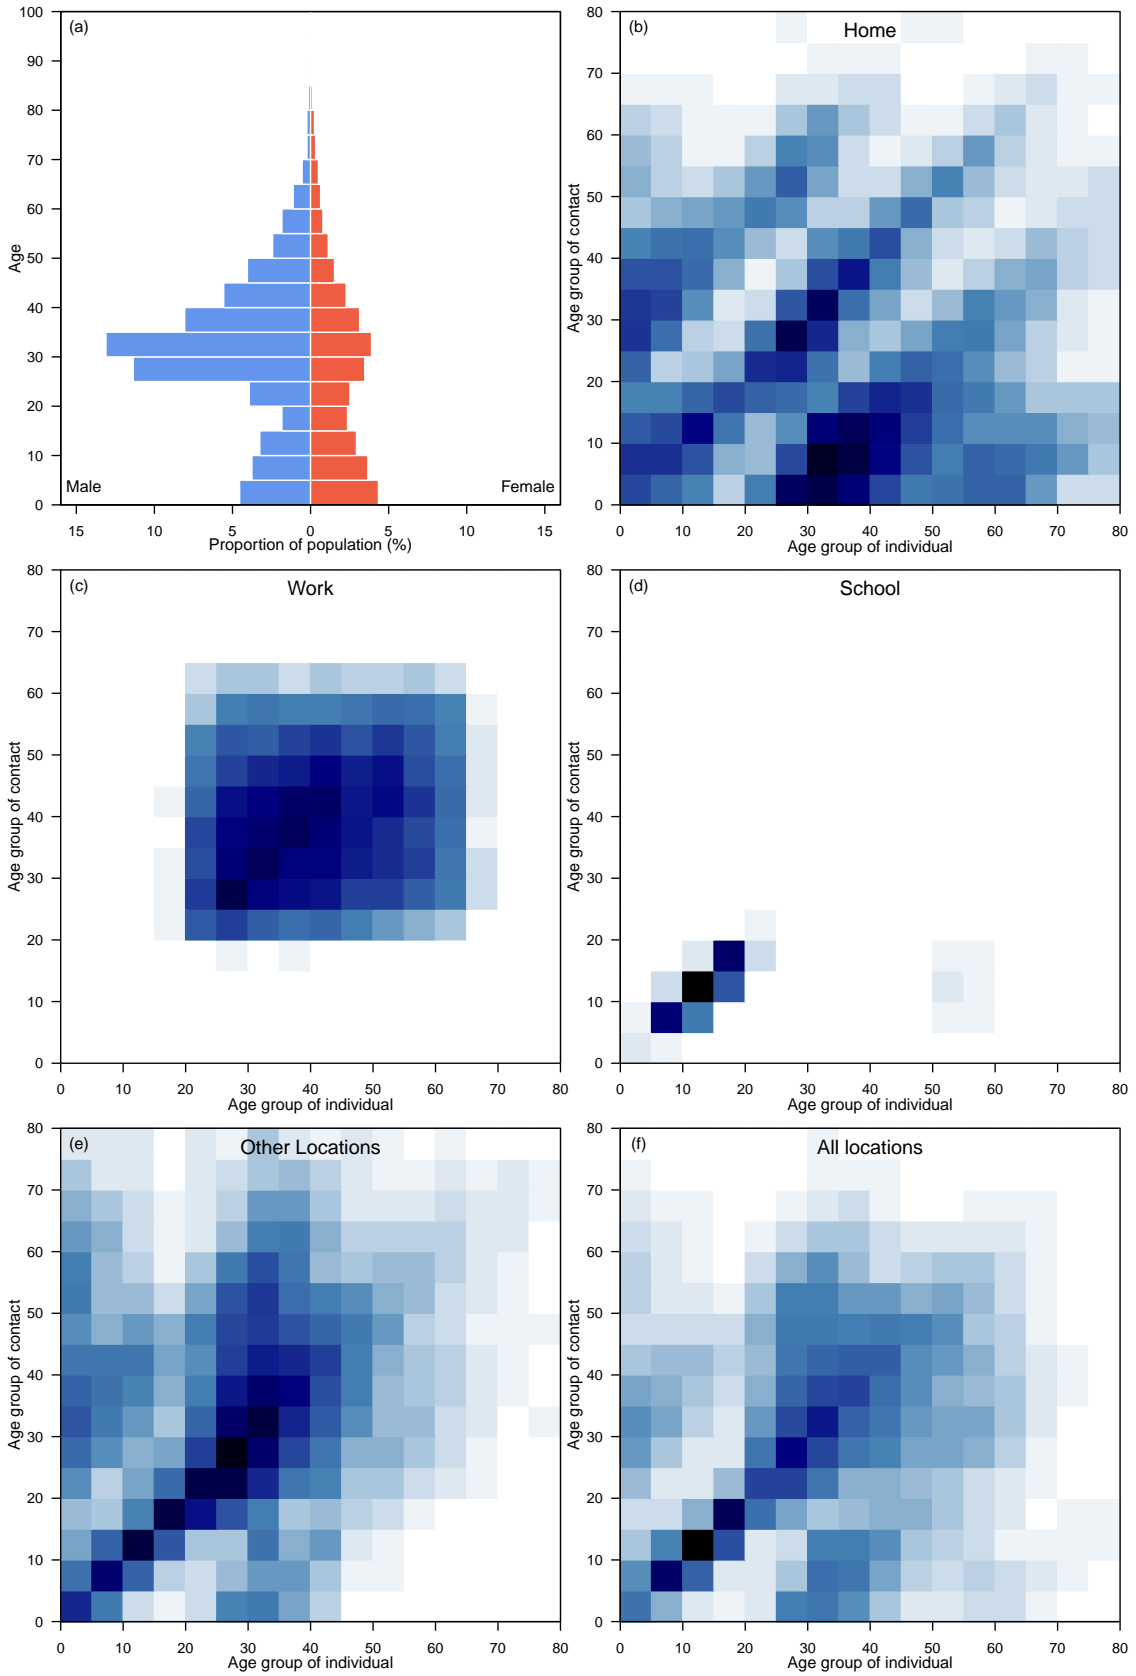

# Pakistan

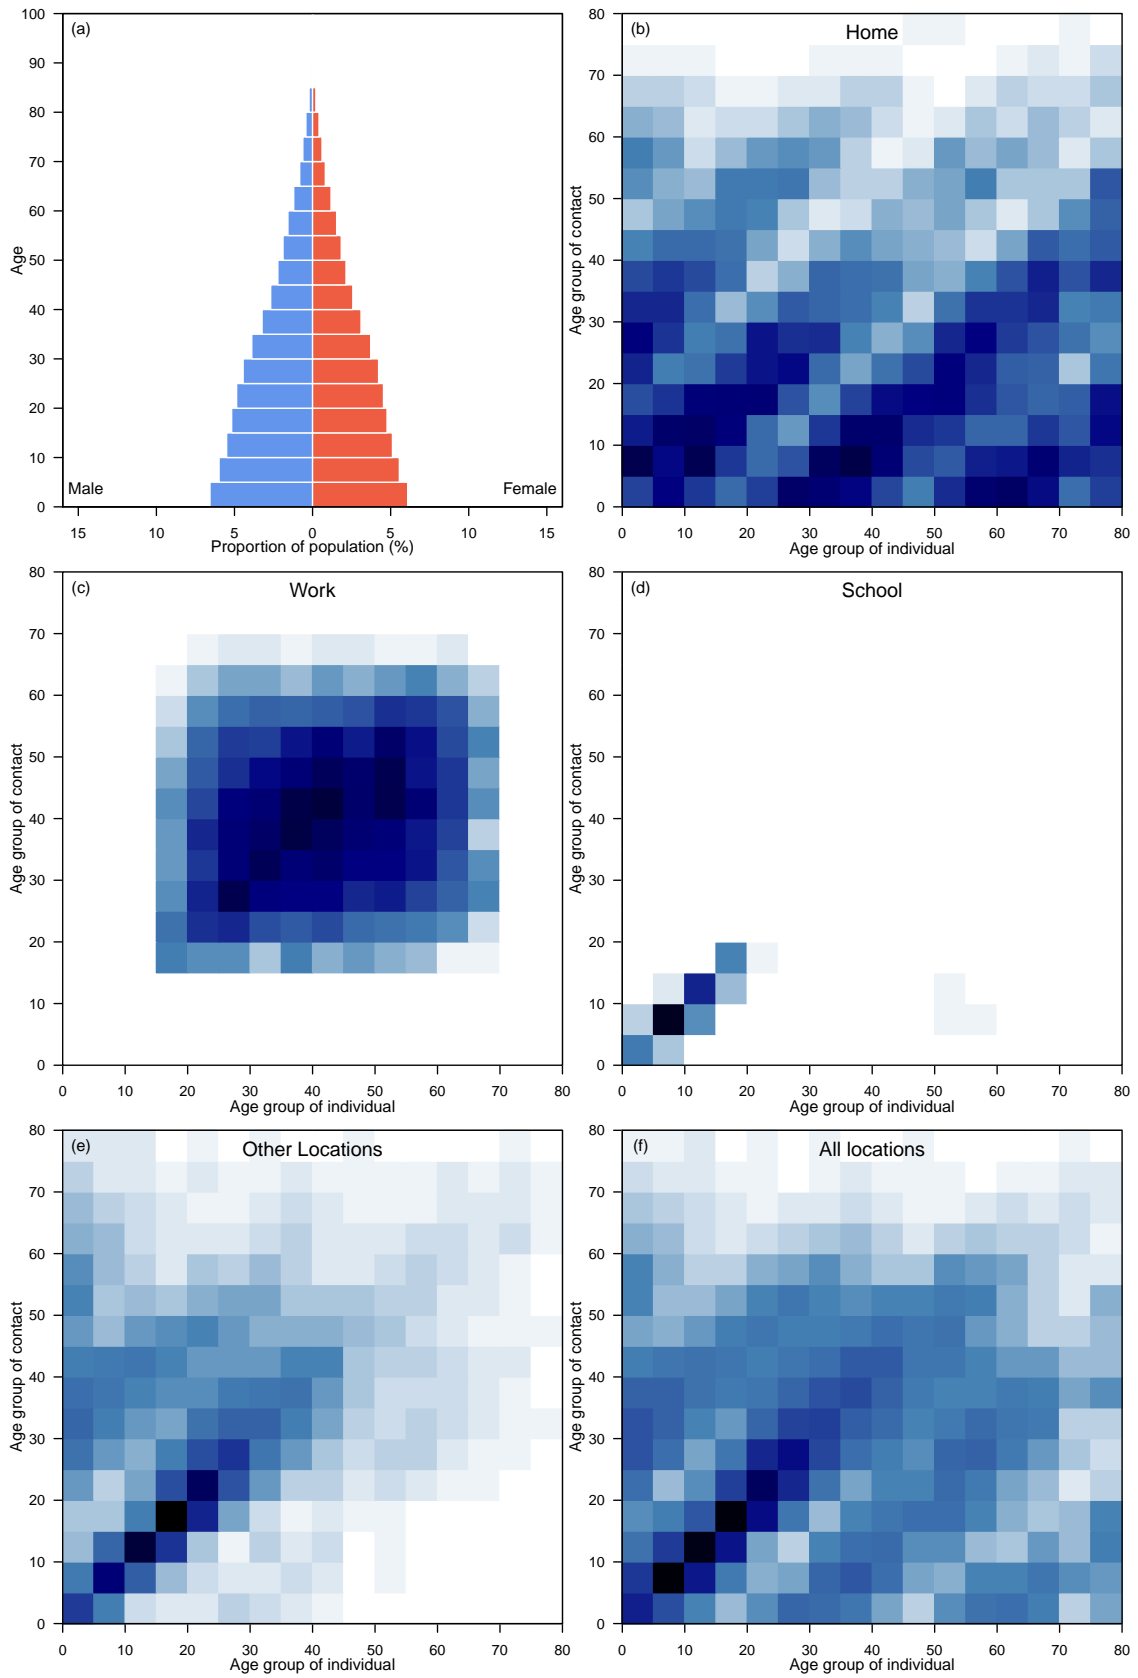

# Panama

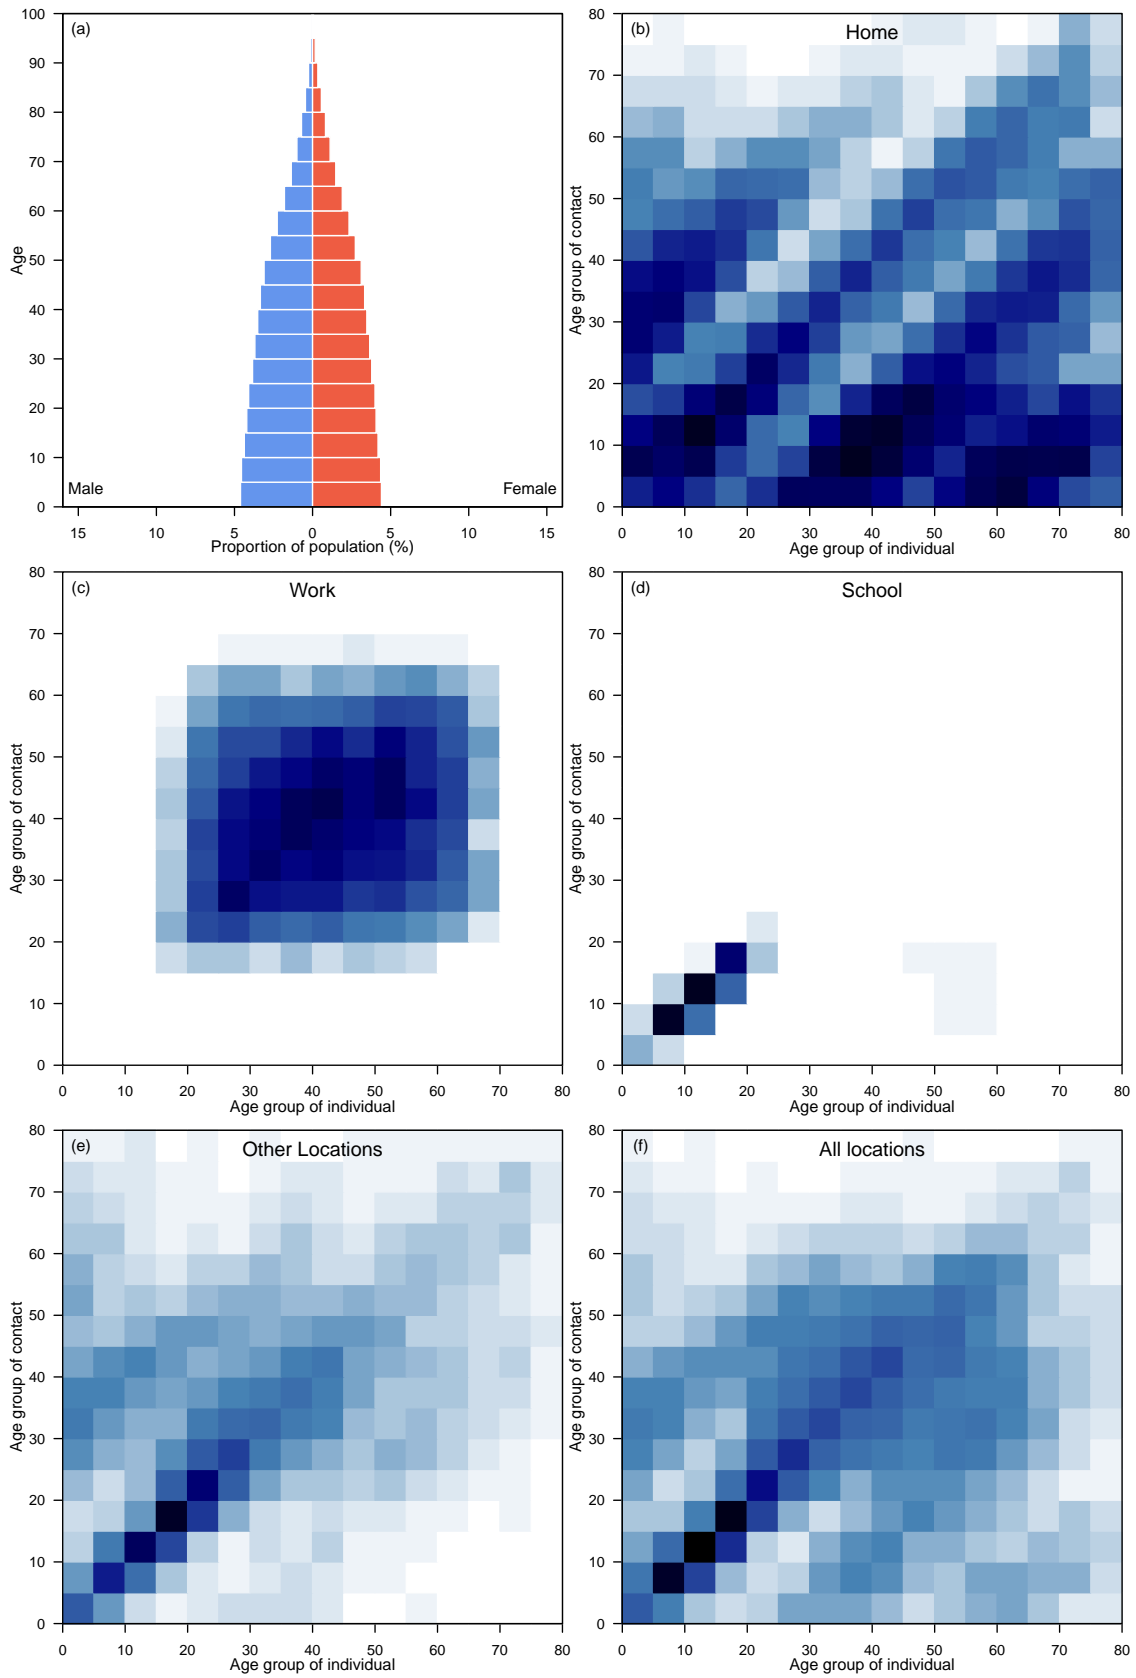

# Papua New Guinea

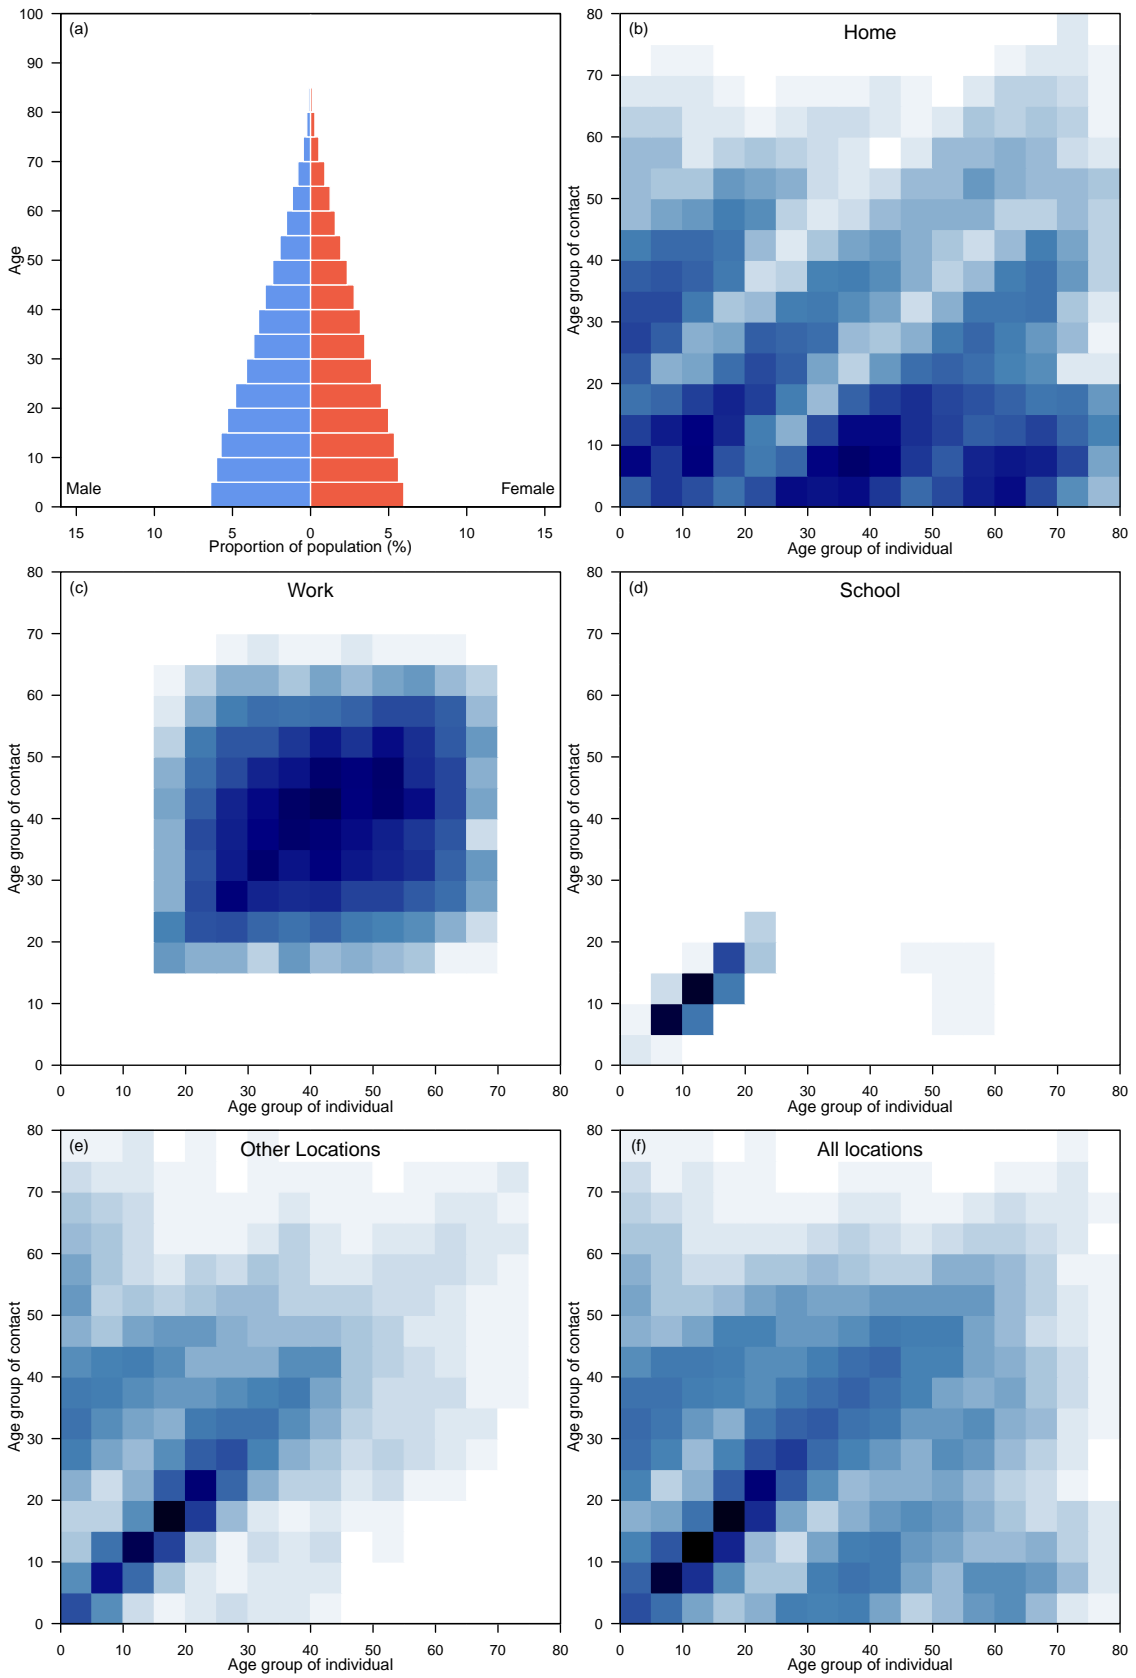

# Paraguay

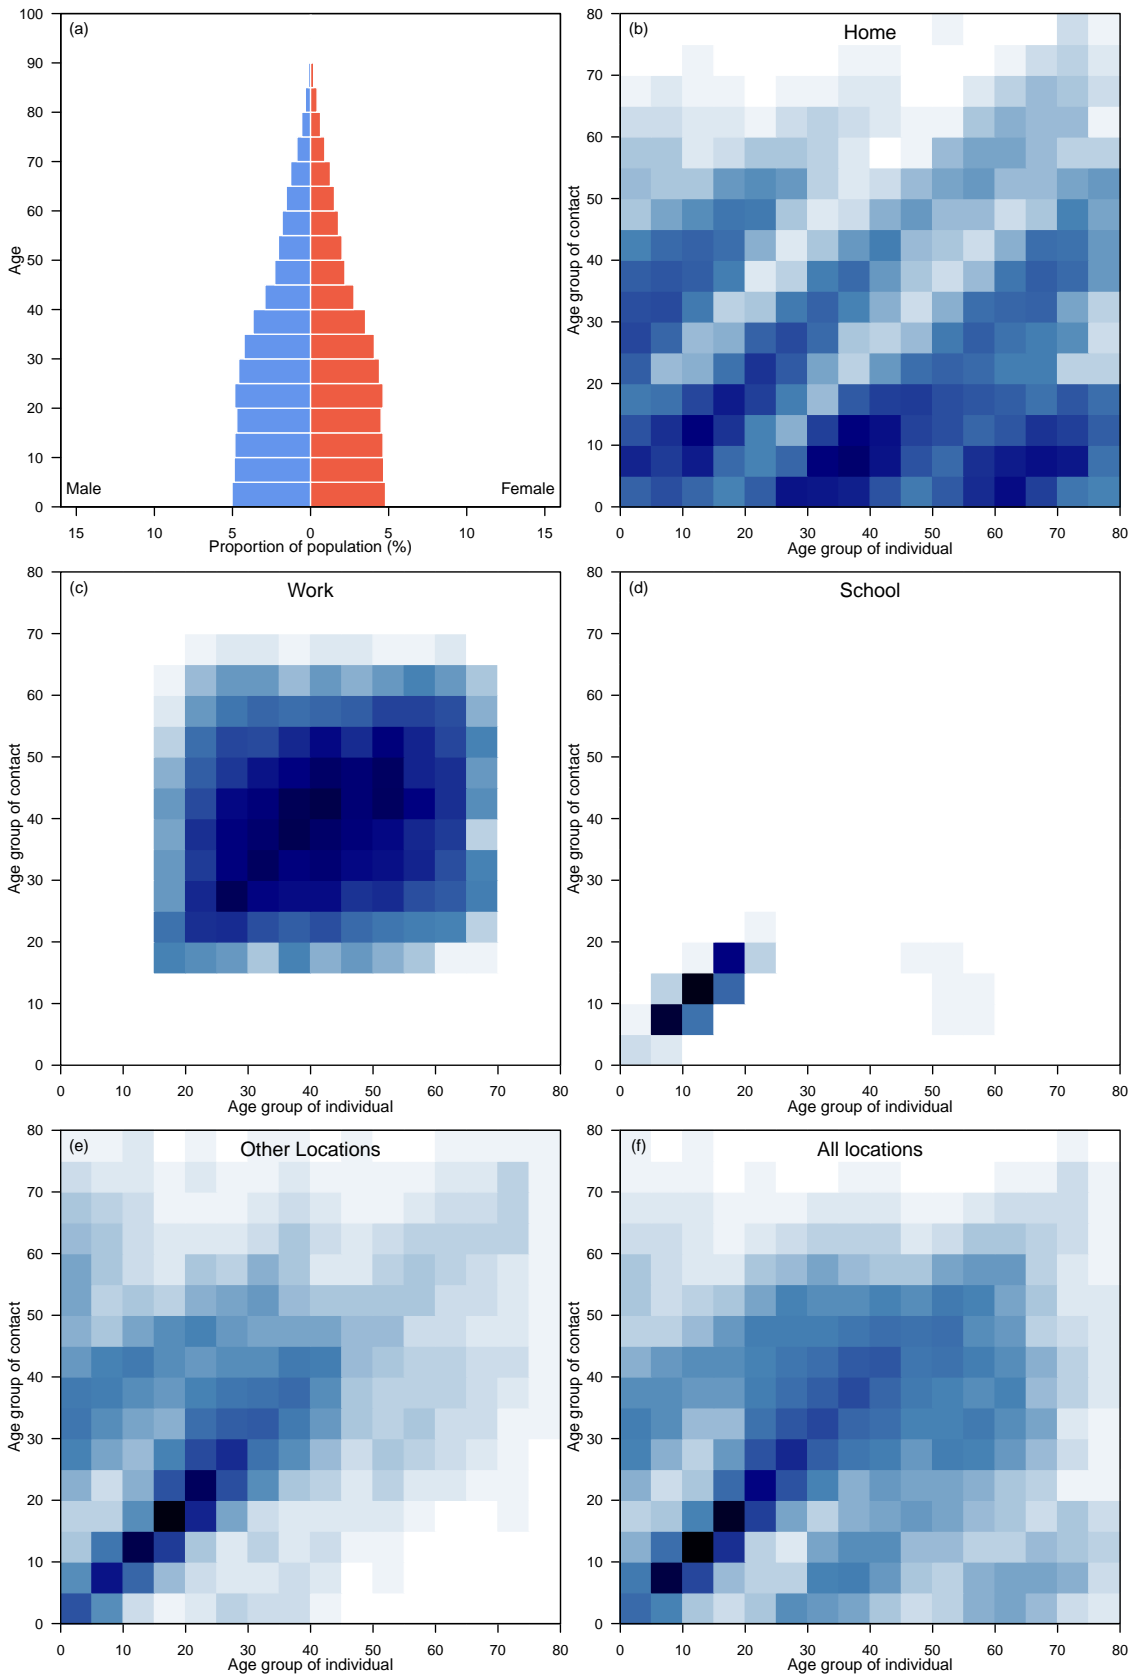



# Peru

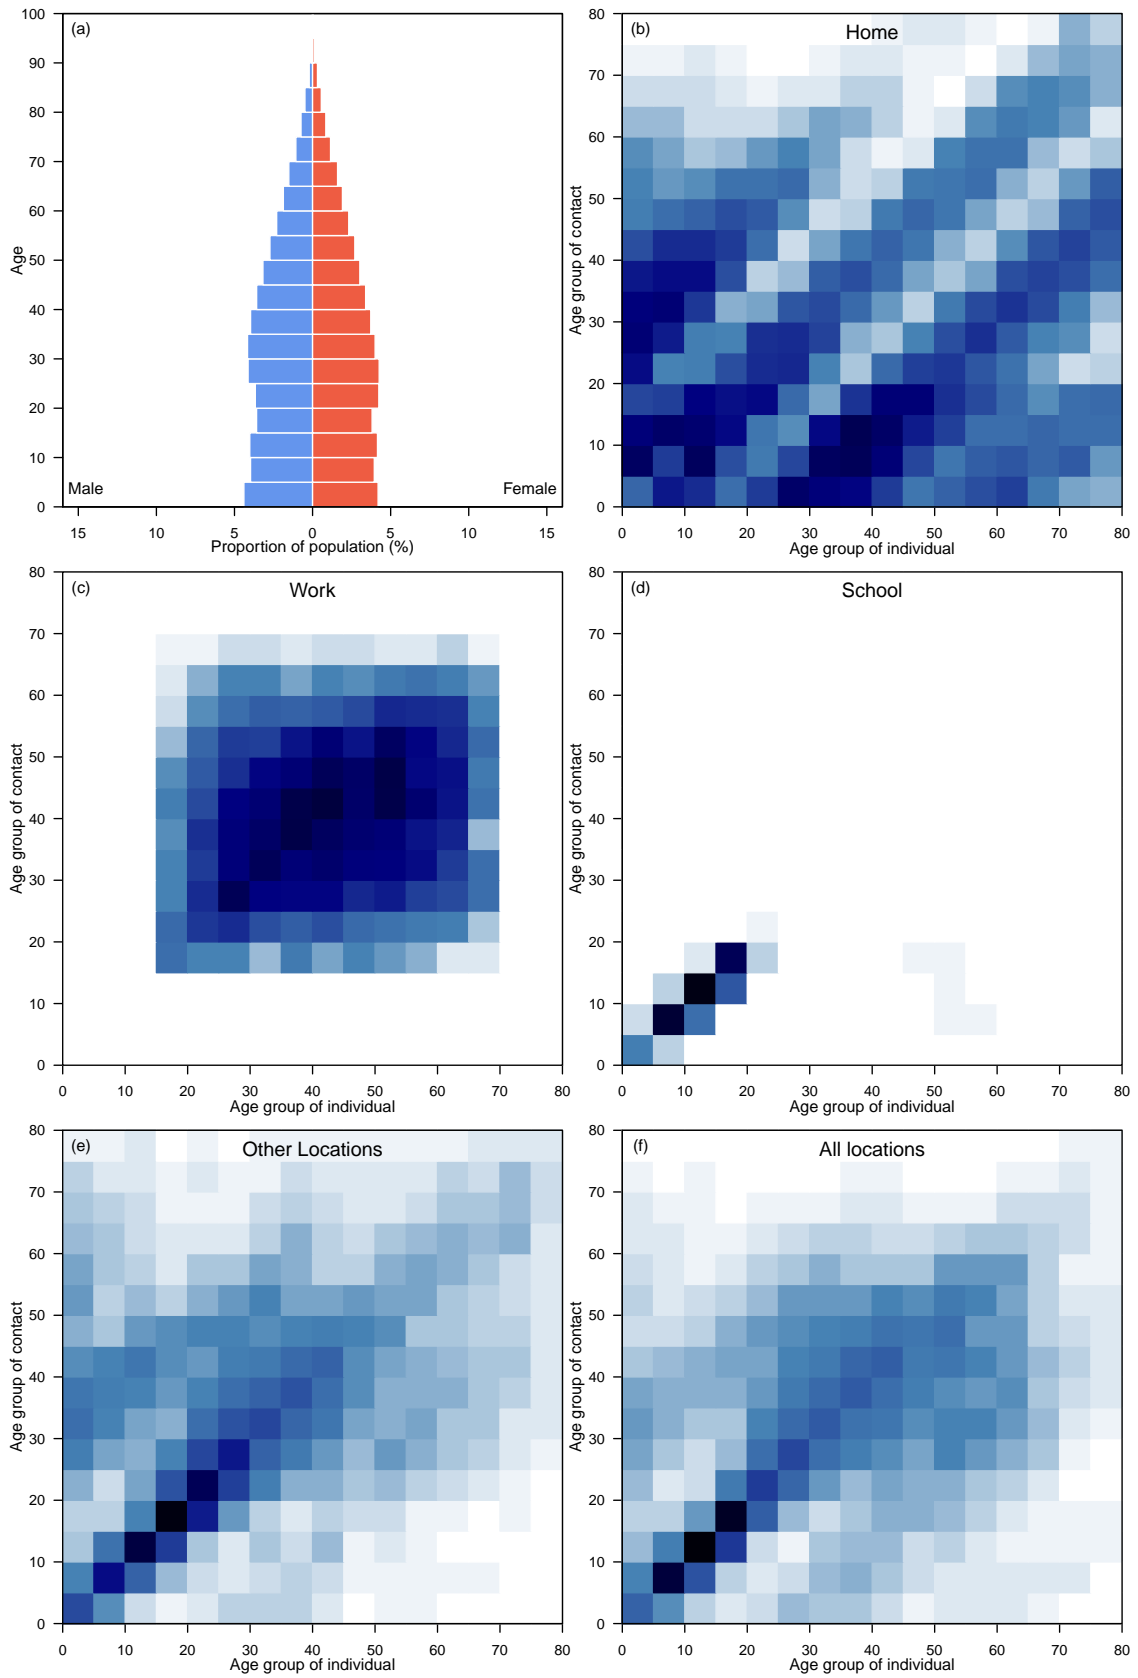

# Philippines

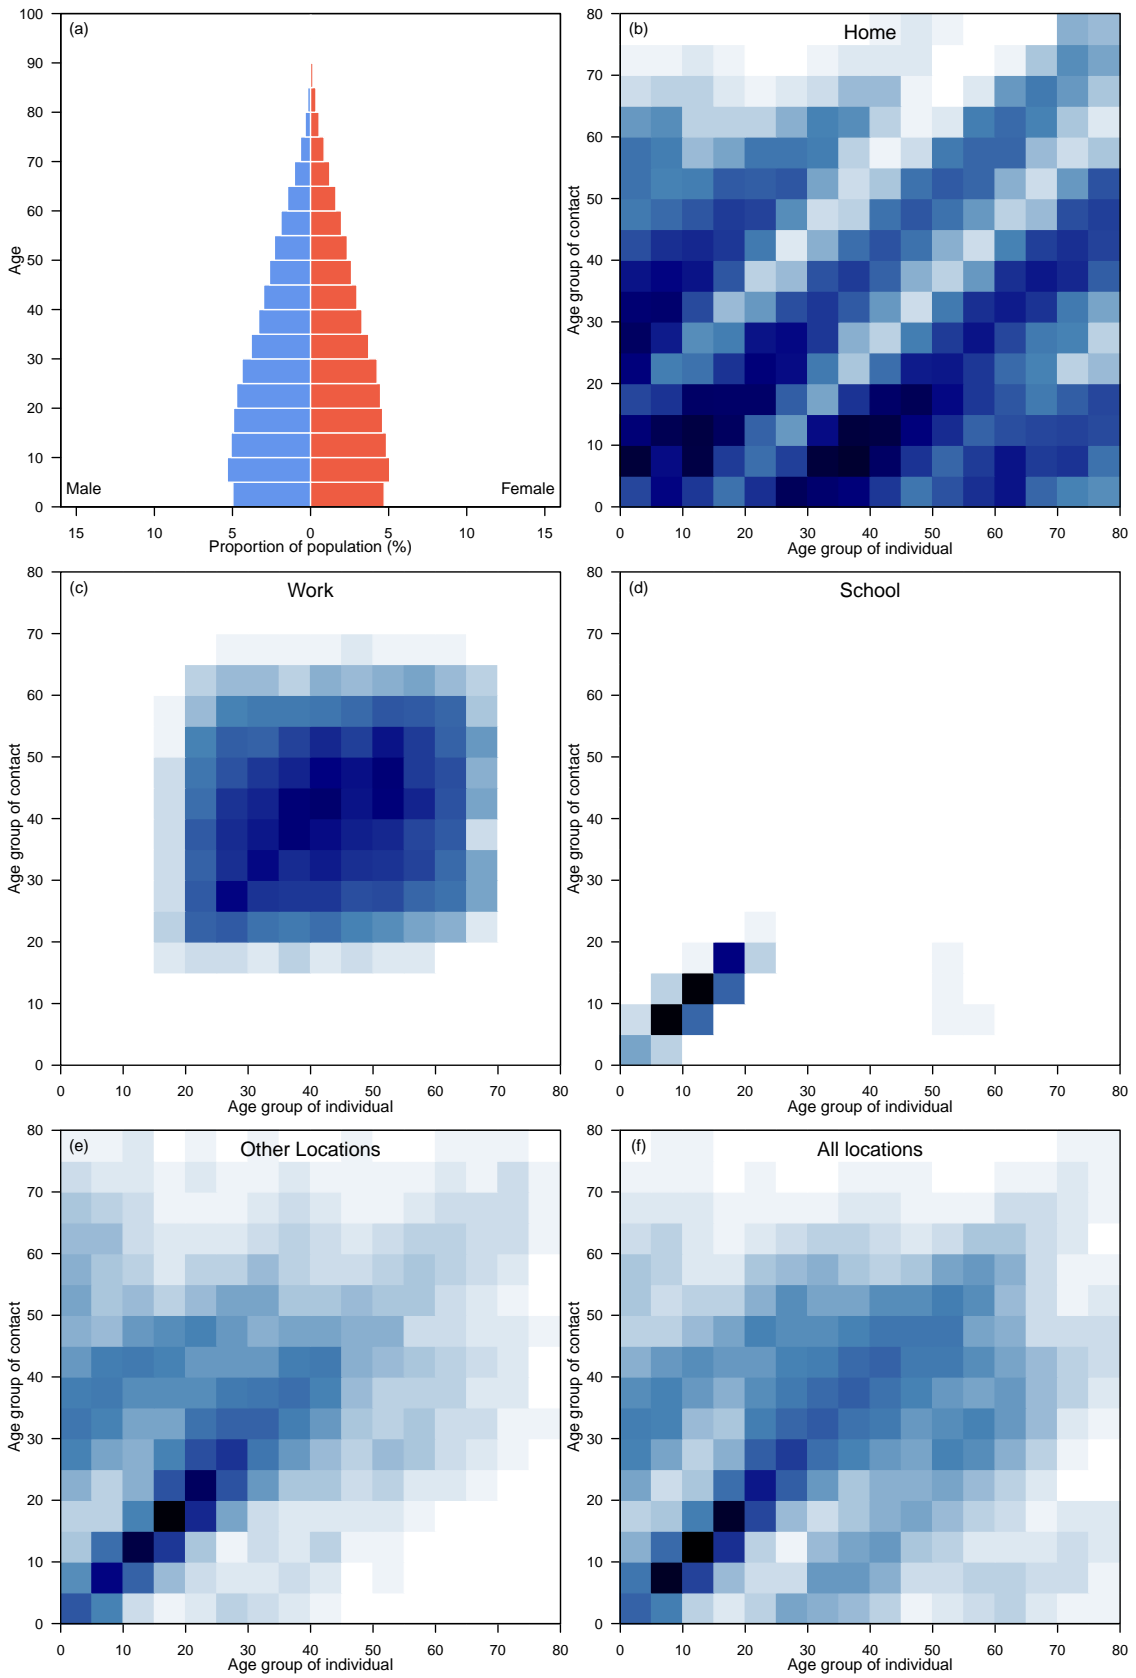

# Poland

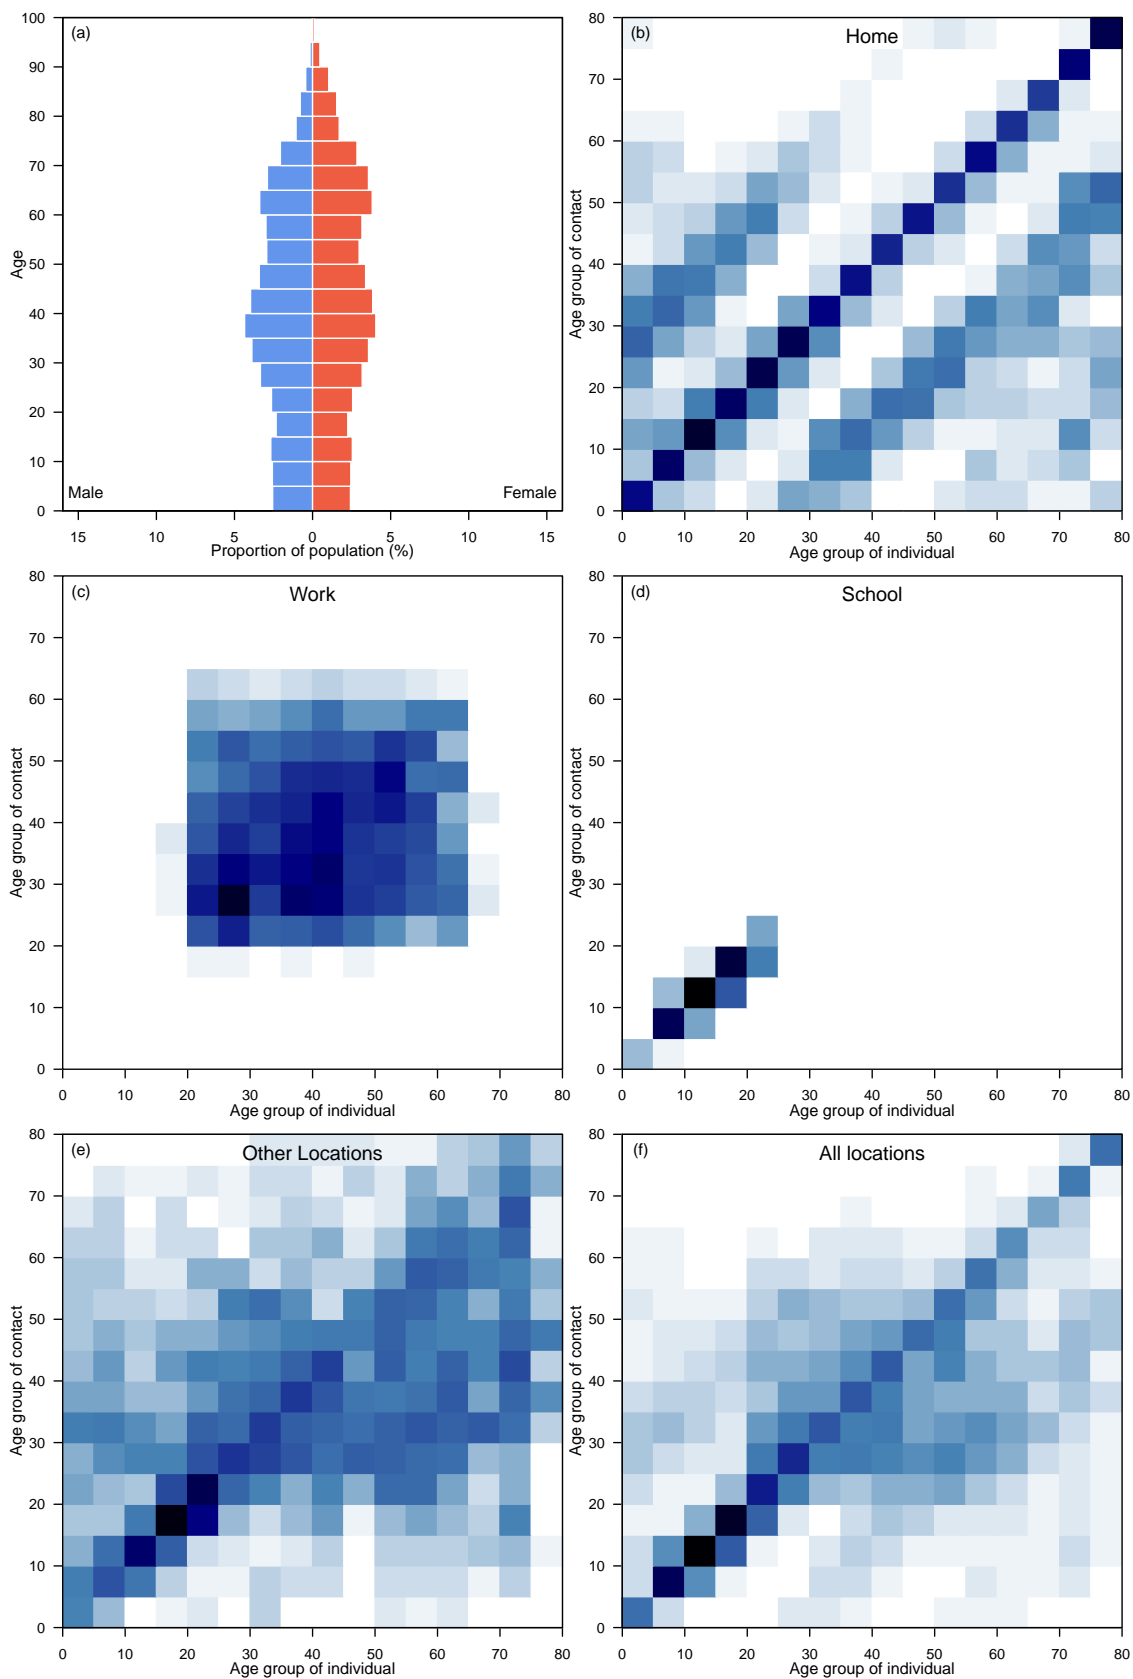

# Portugal

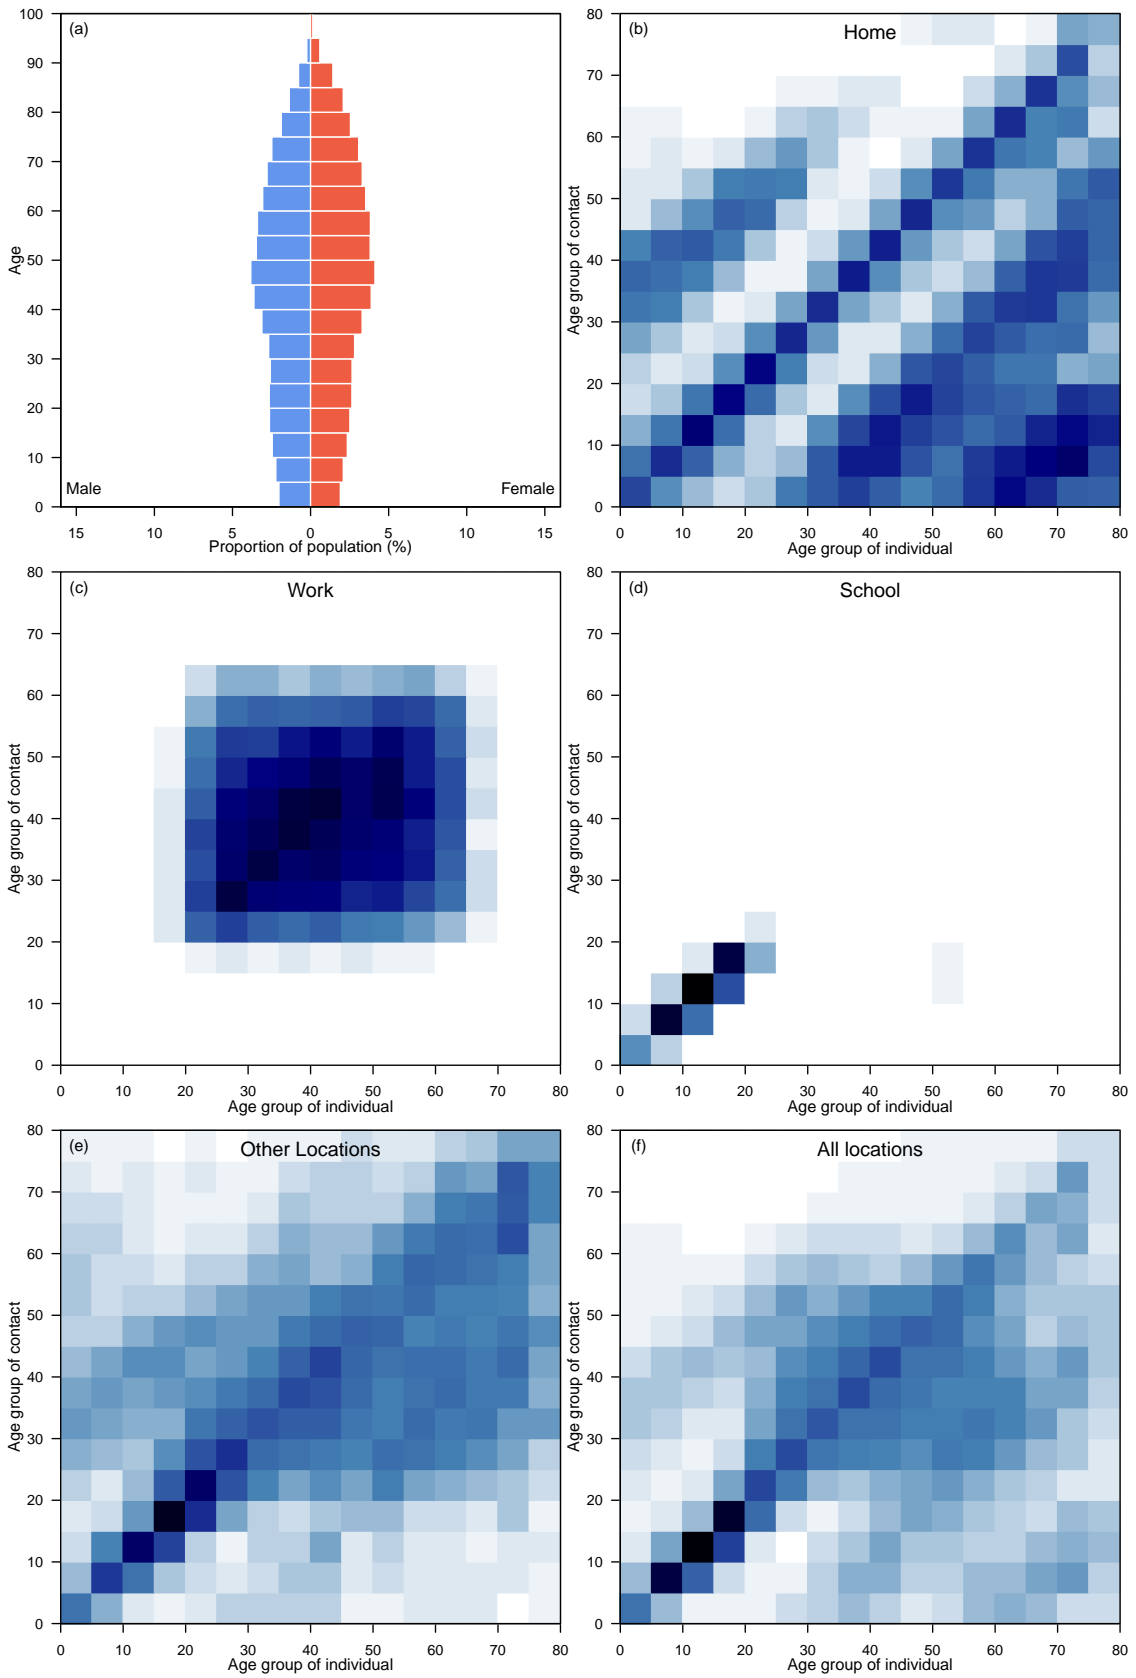

# Puerto Rico

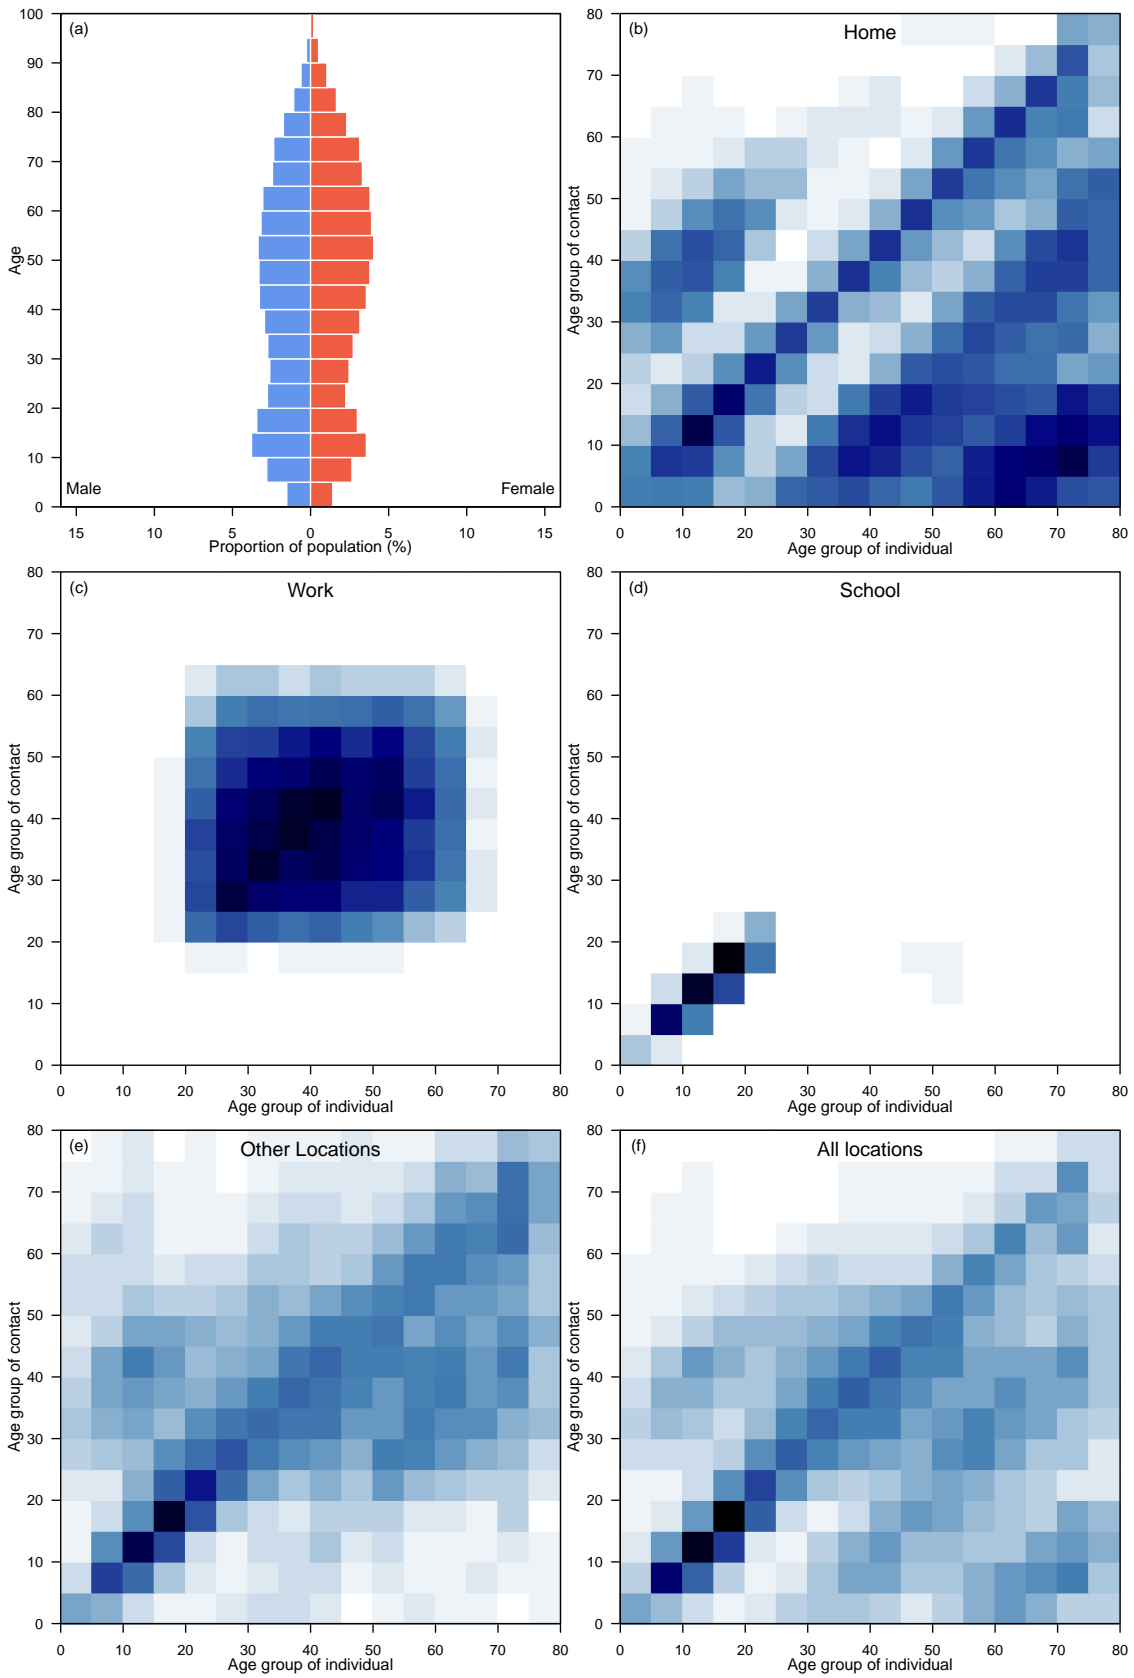

# Qatar

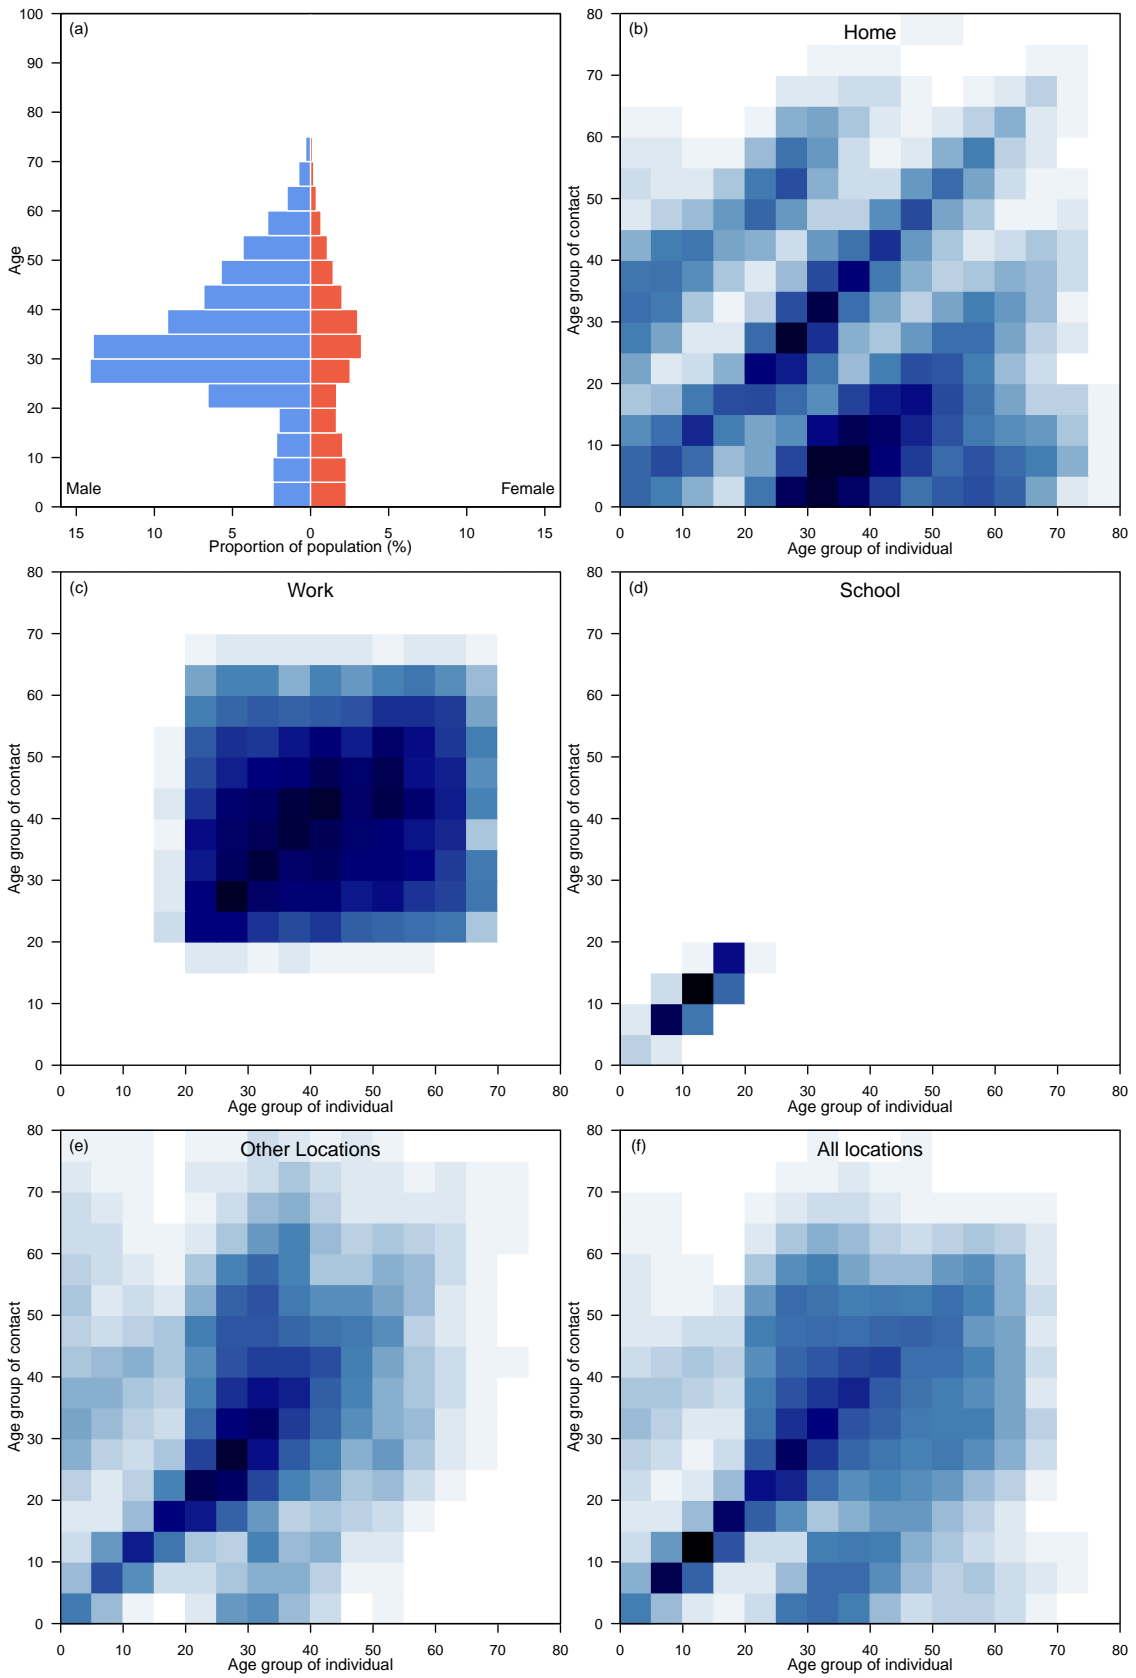

# Republic of Korea

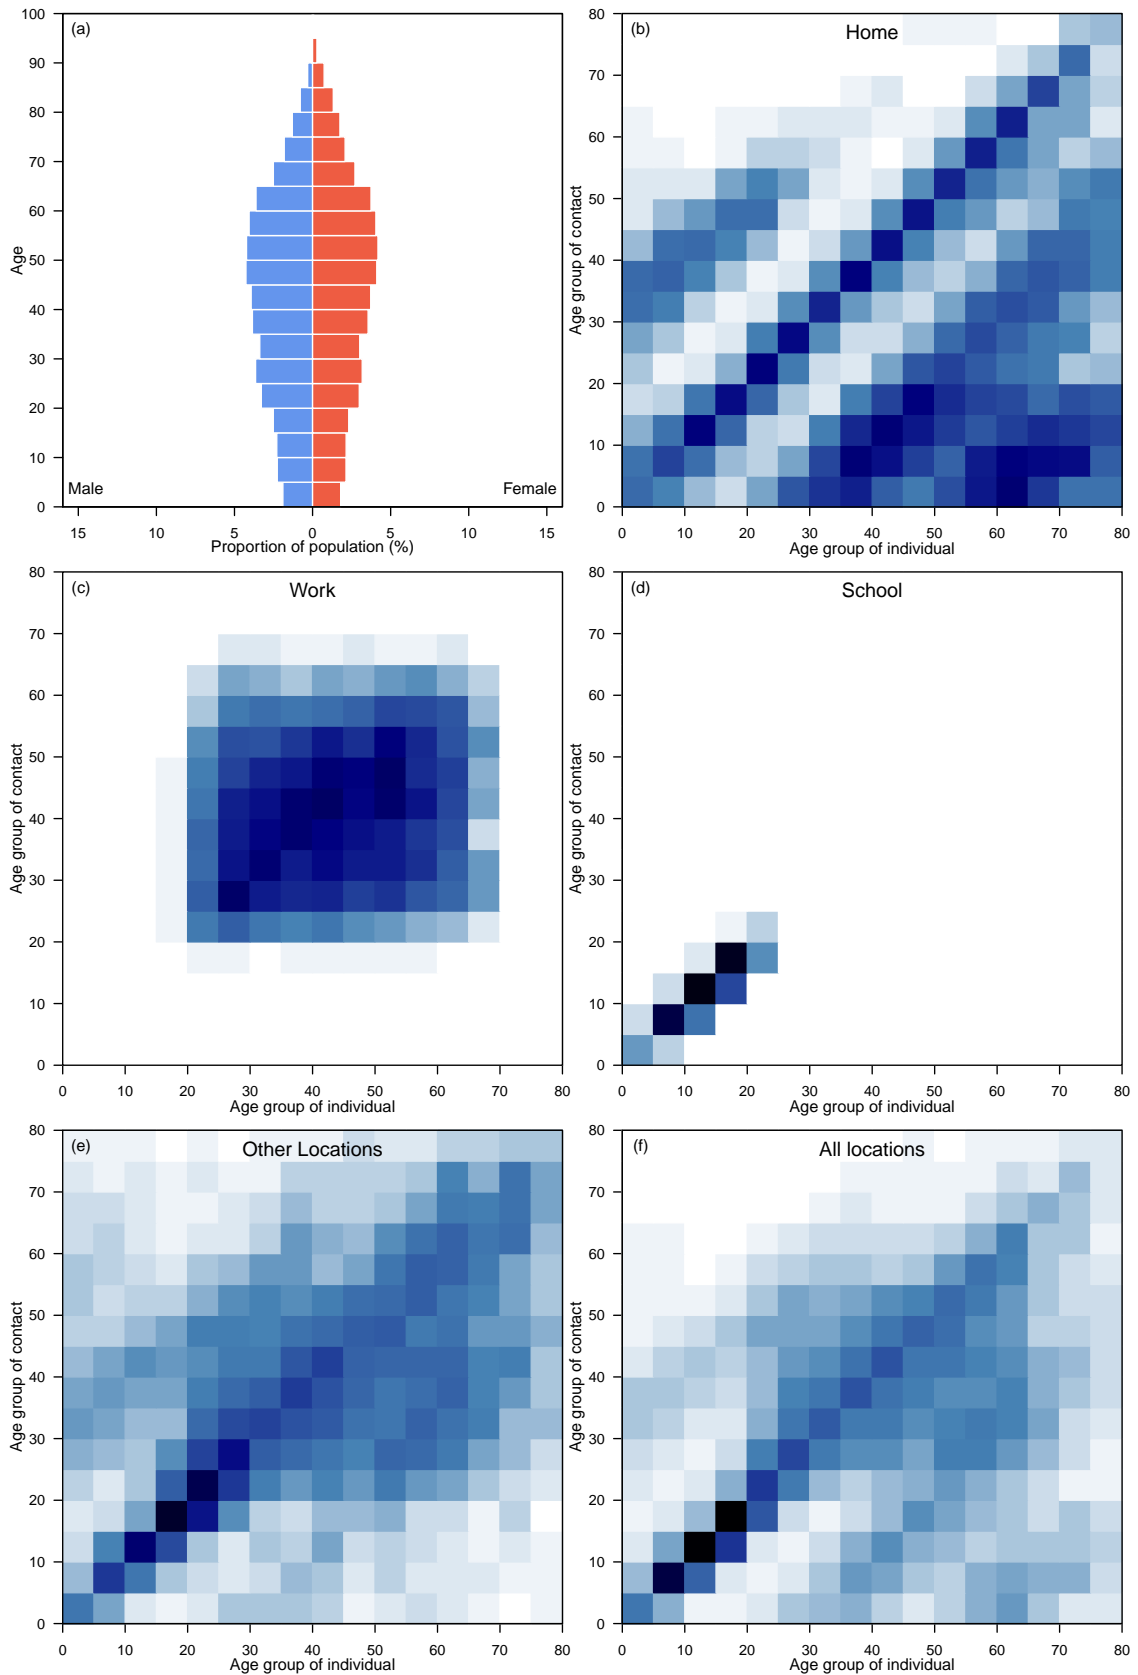

# Republic of Moldova

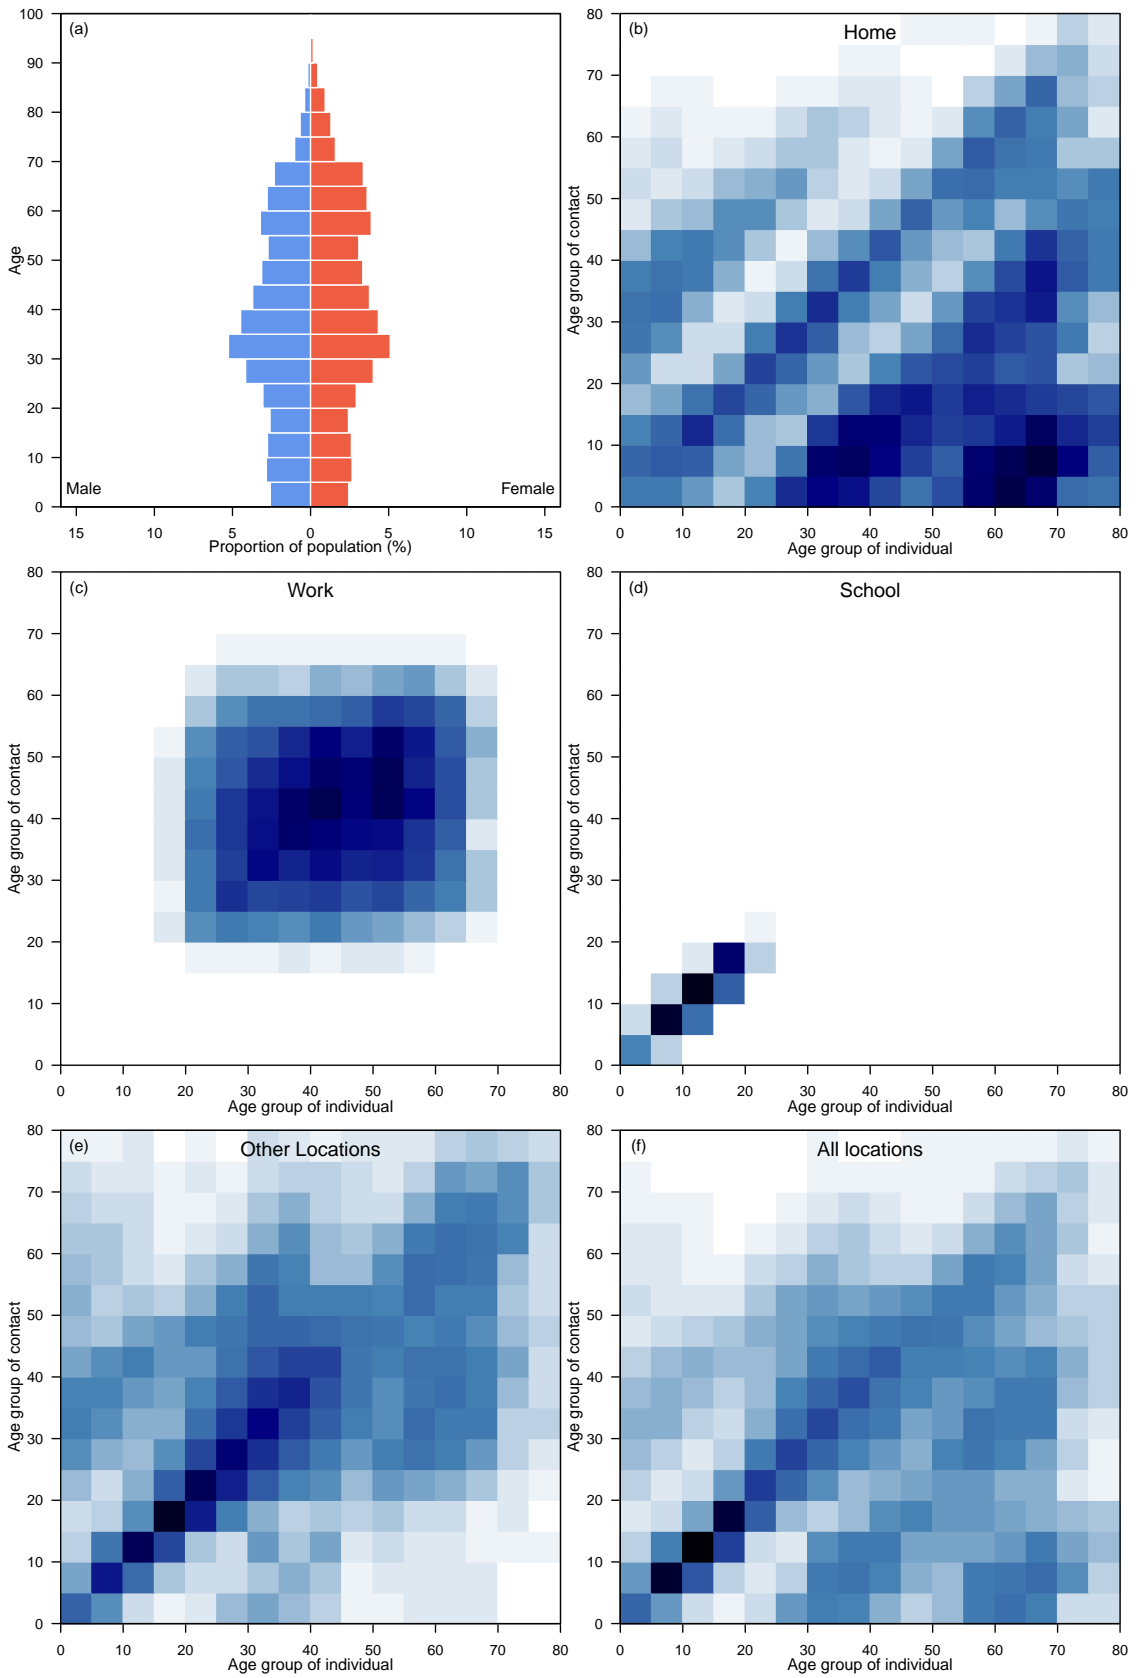



# Romania

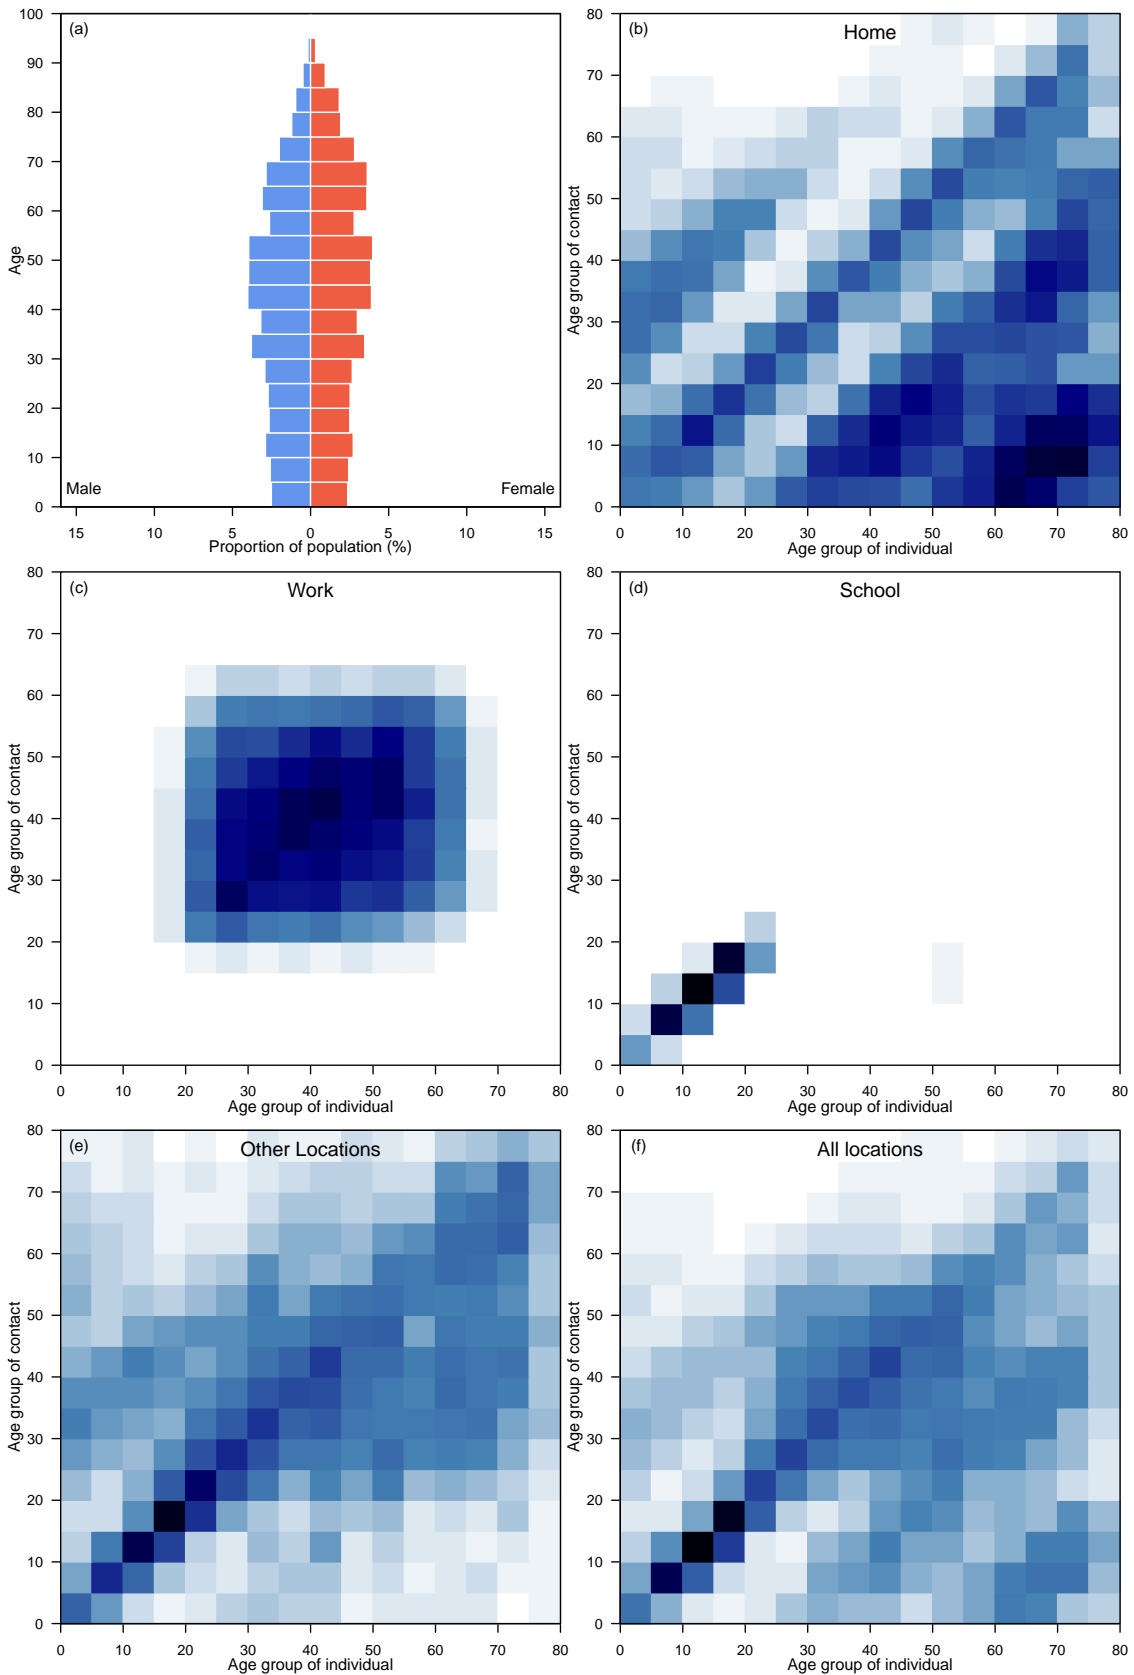

# Russian Federation

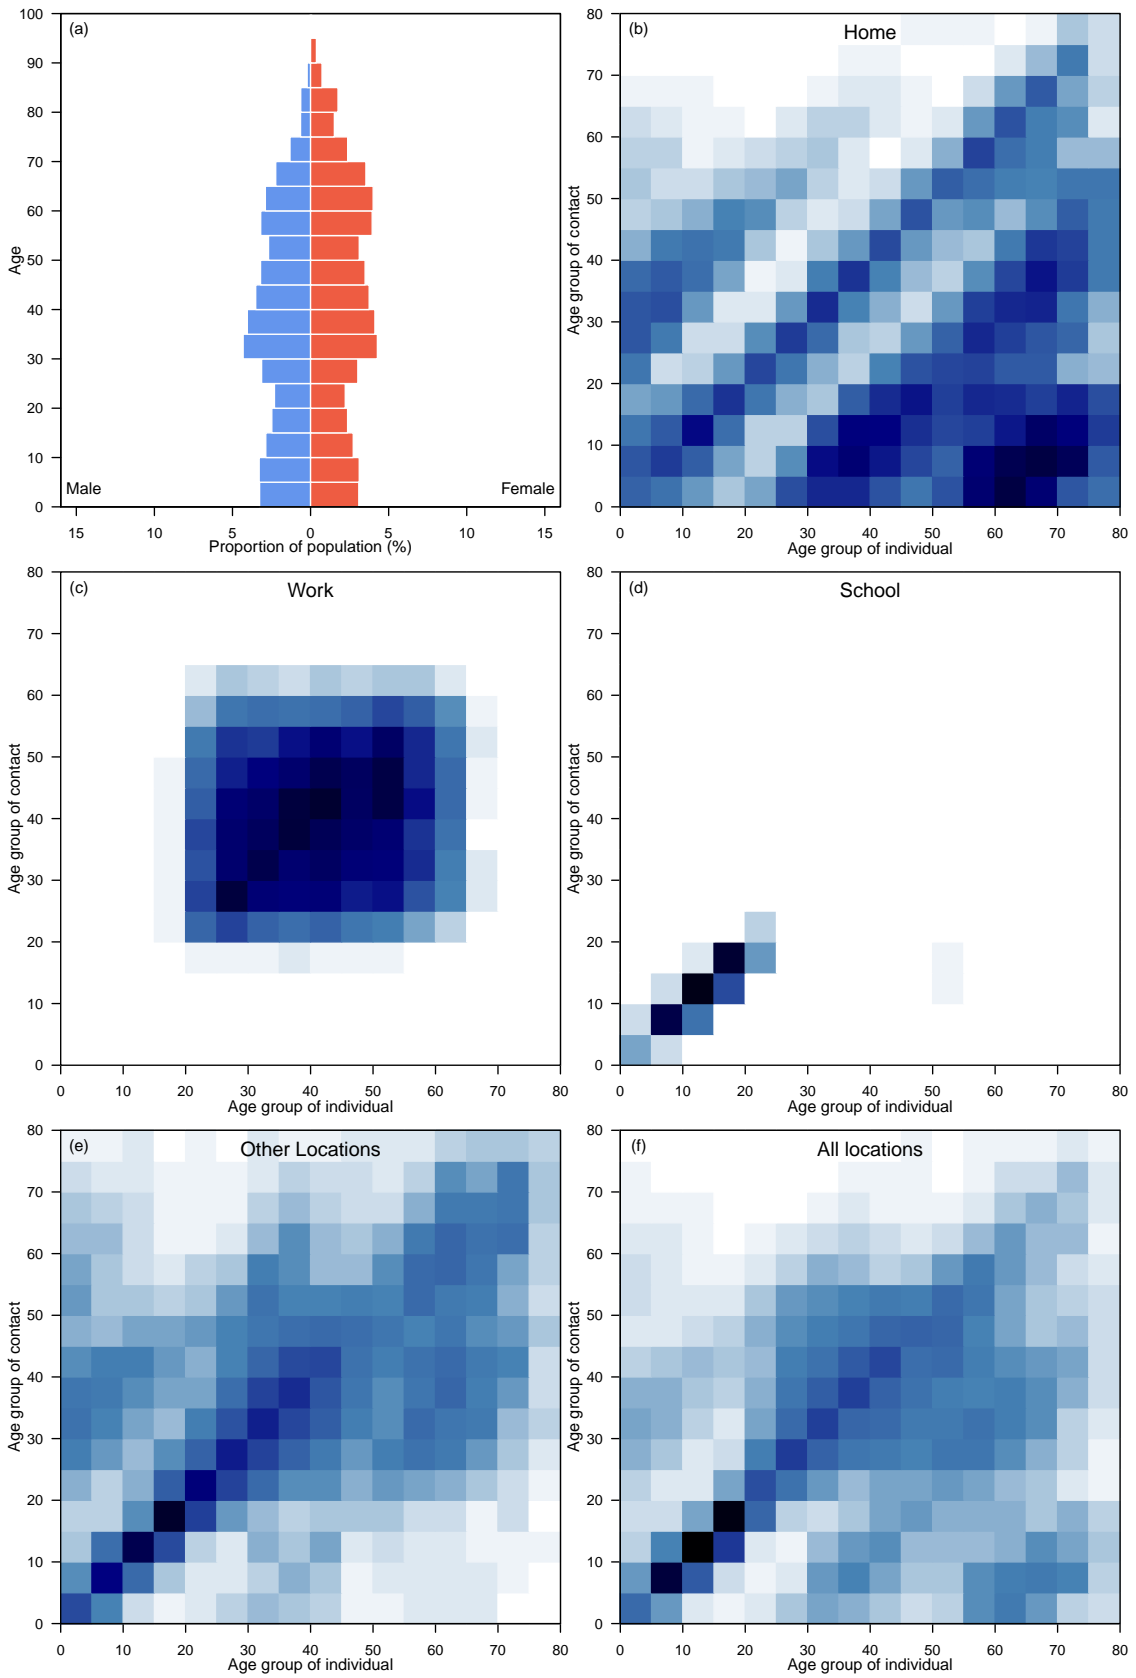

# Rwanda

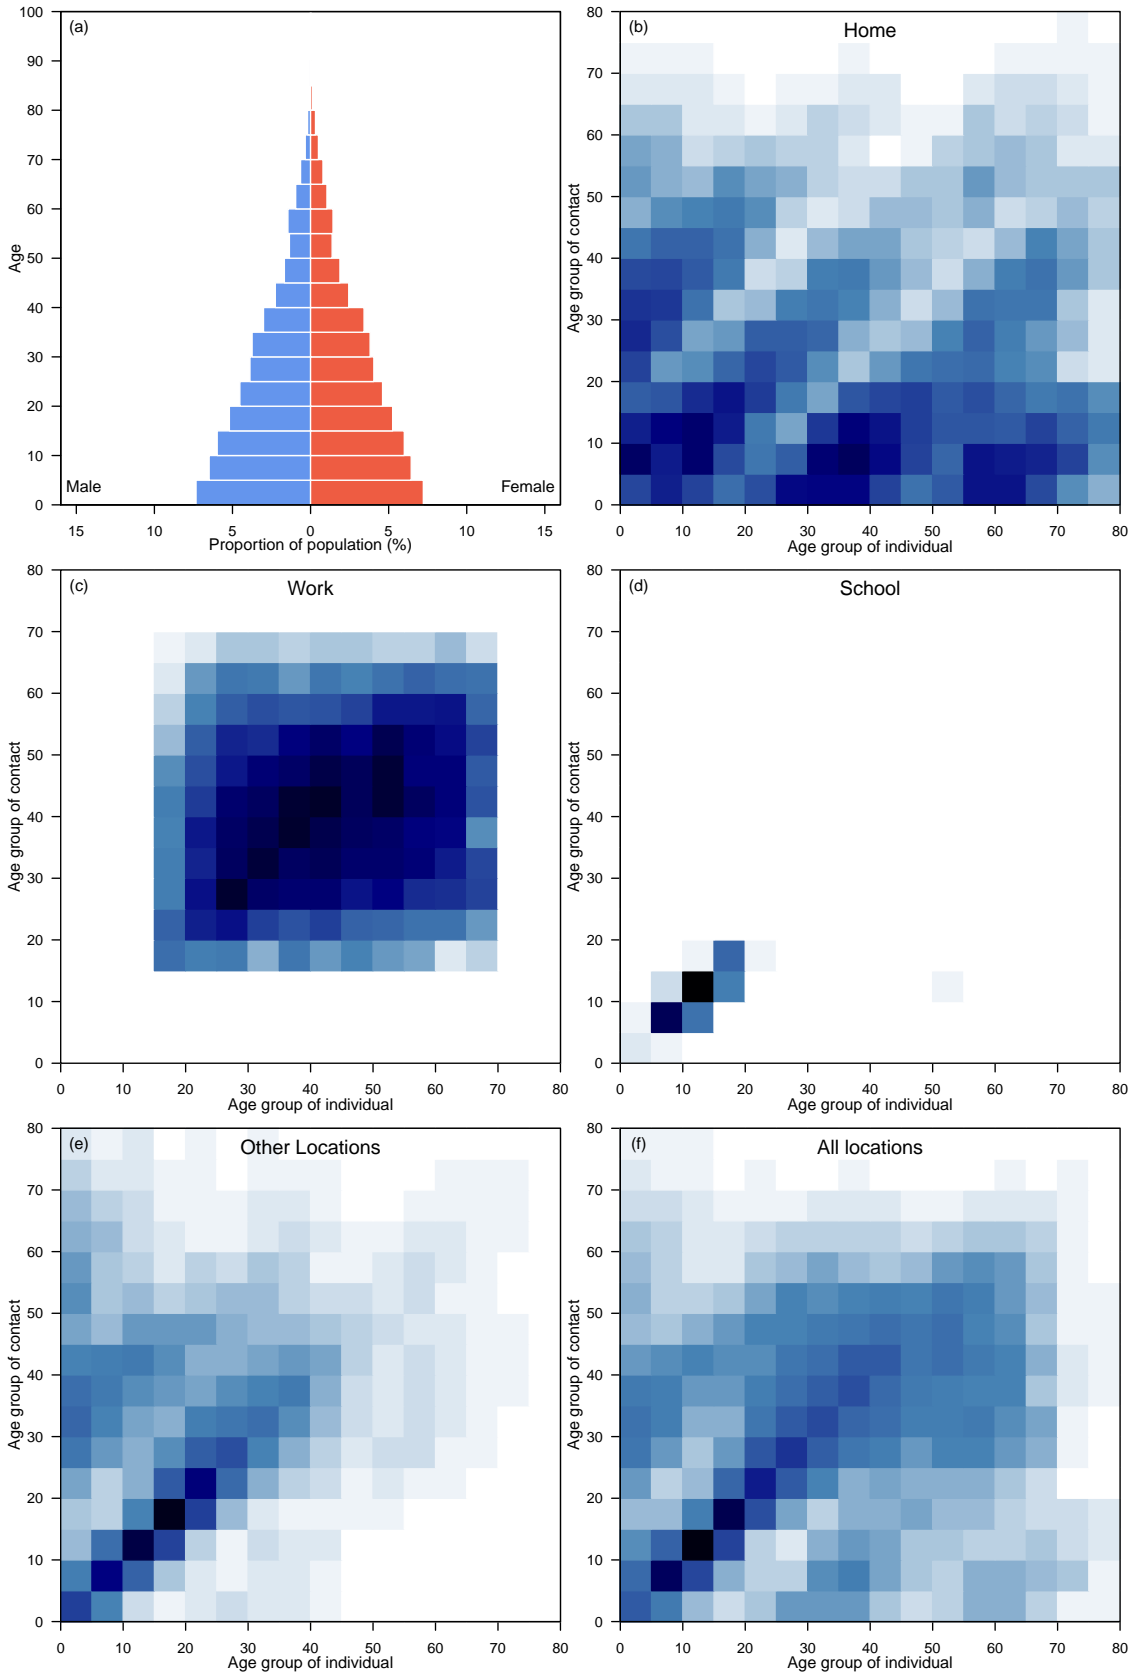

# Saint Lucia

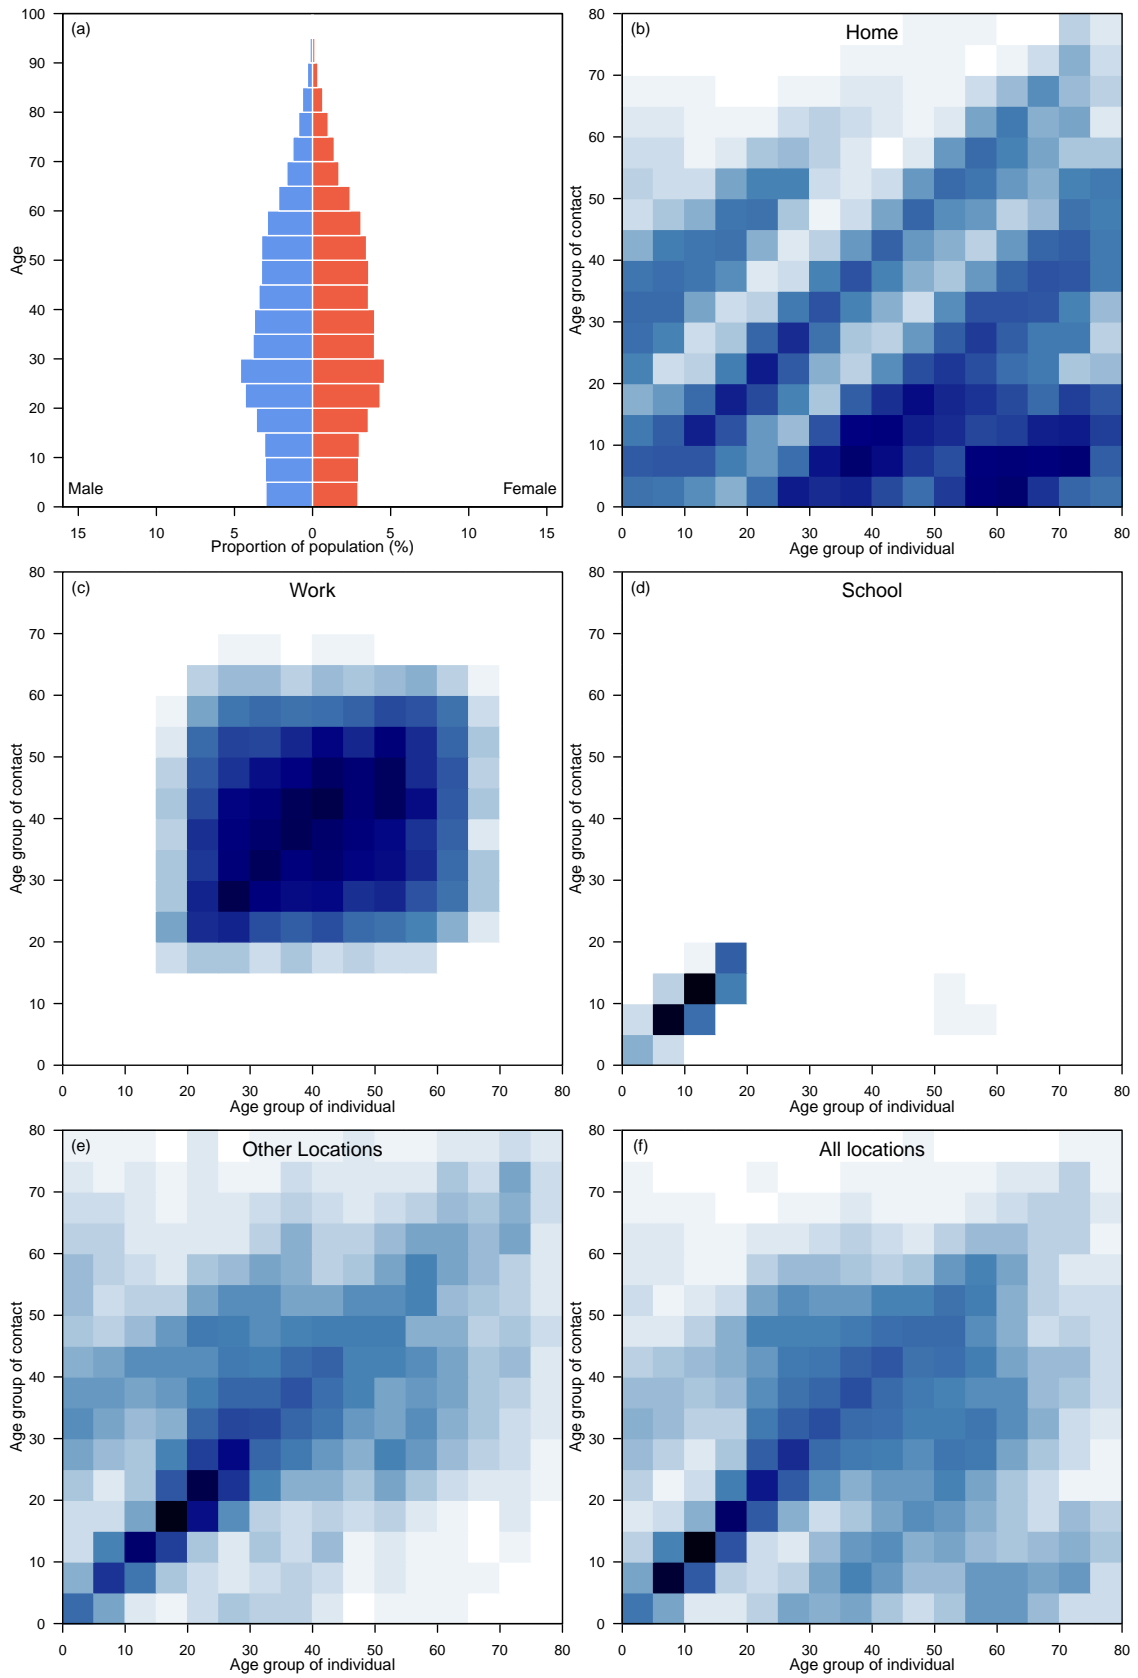

## Saint Vincent and the Grenadines

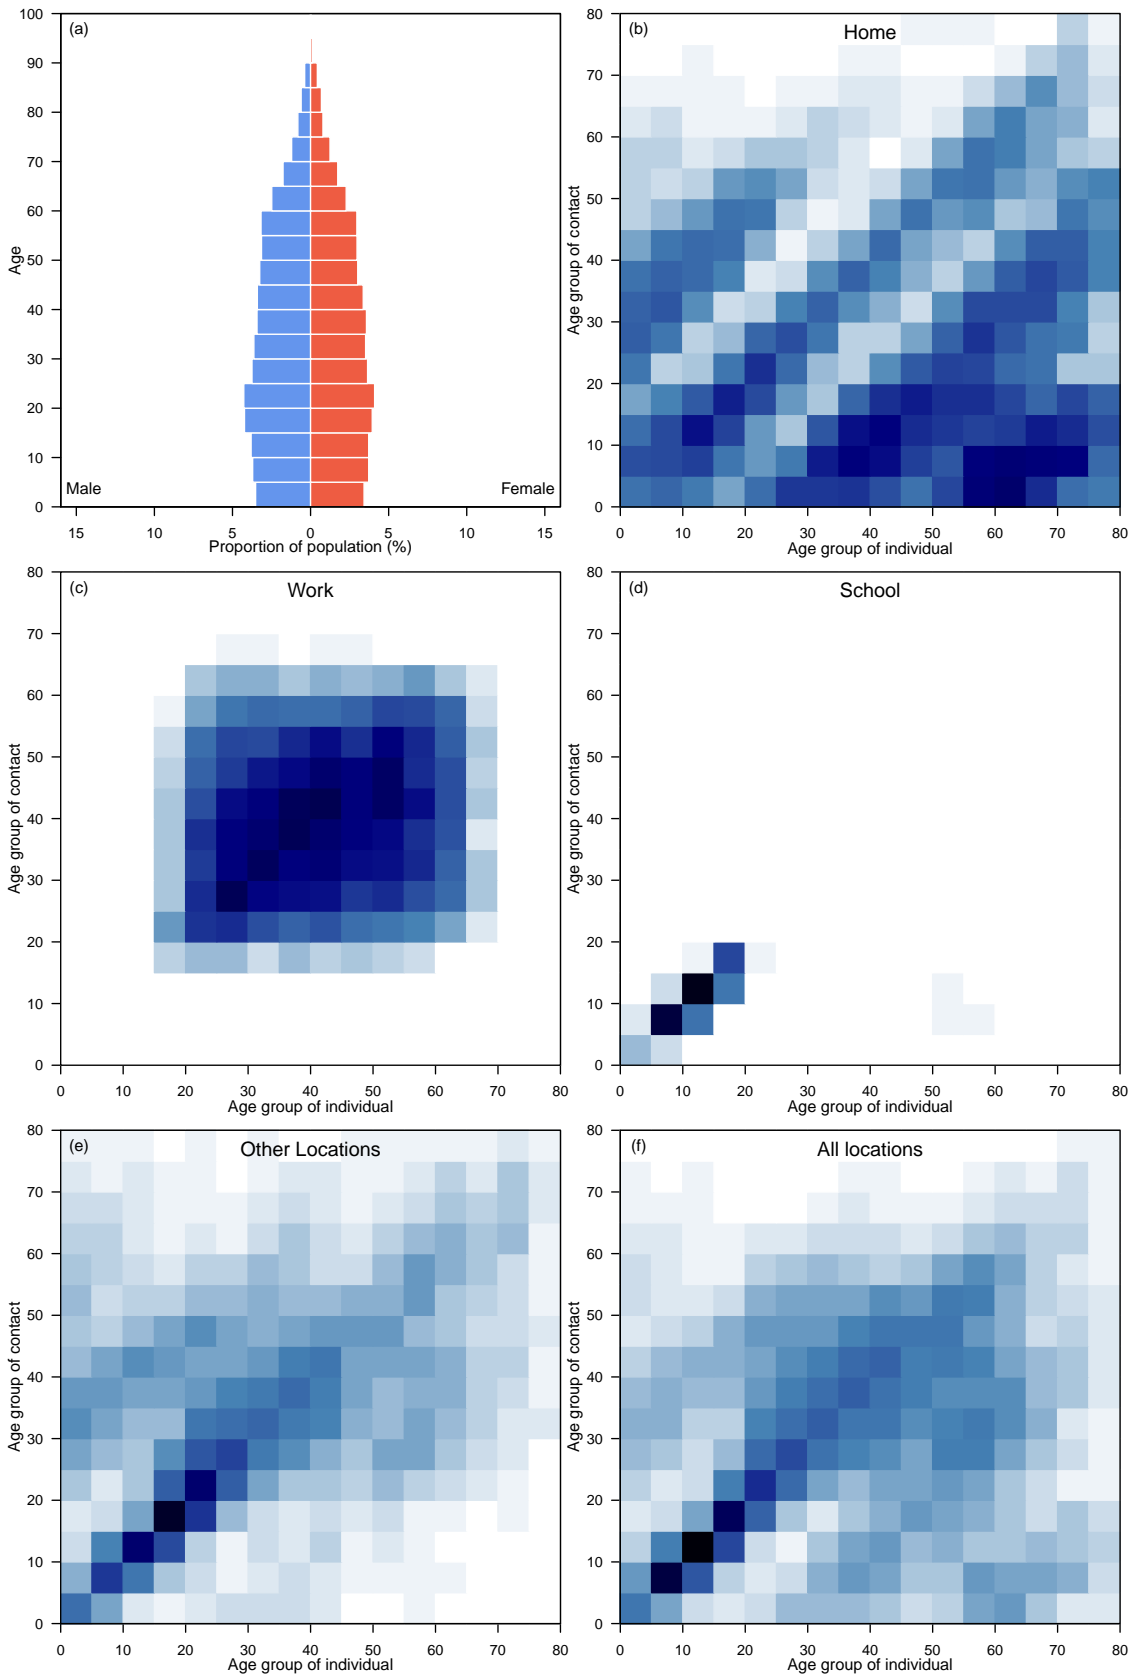

# Samoa

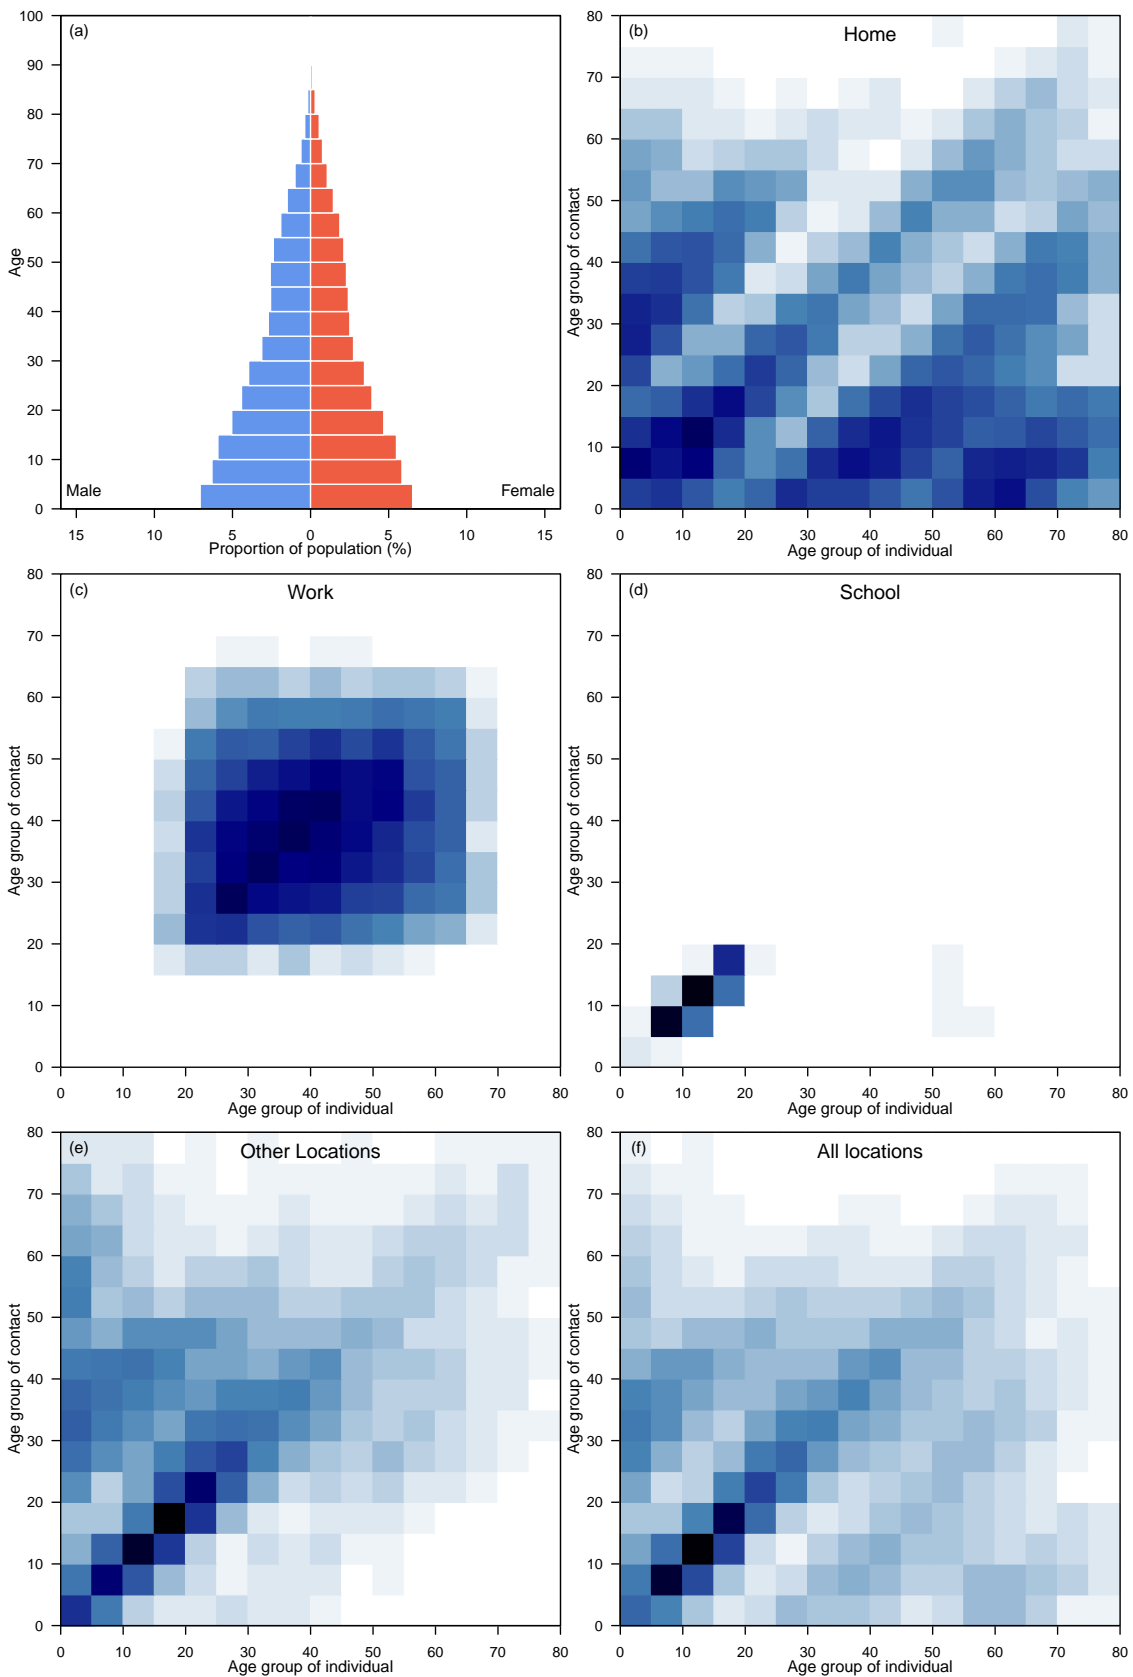

# Sao Tome and Principe

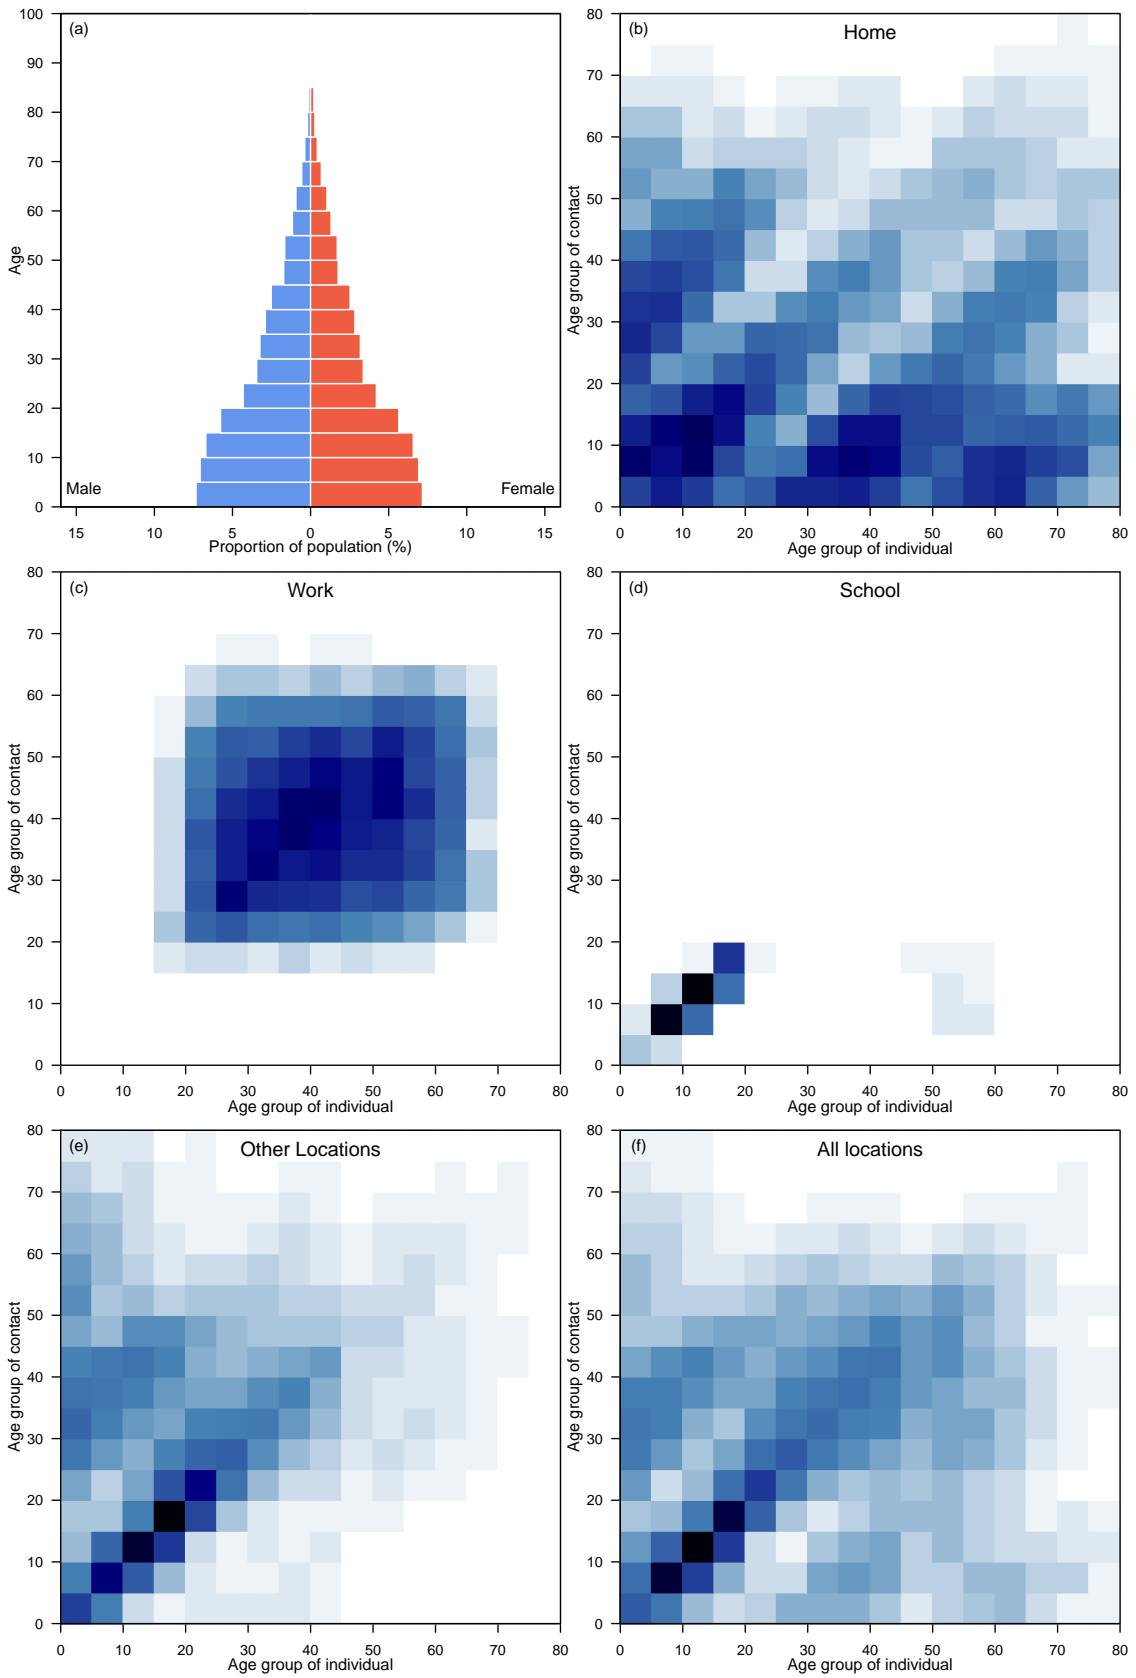

# Saudi Arabia

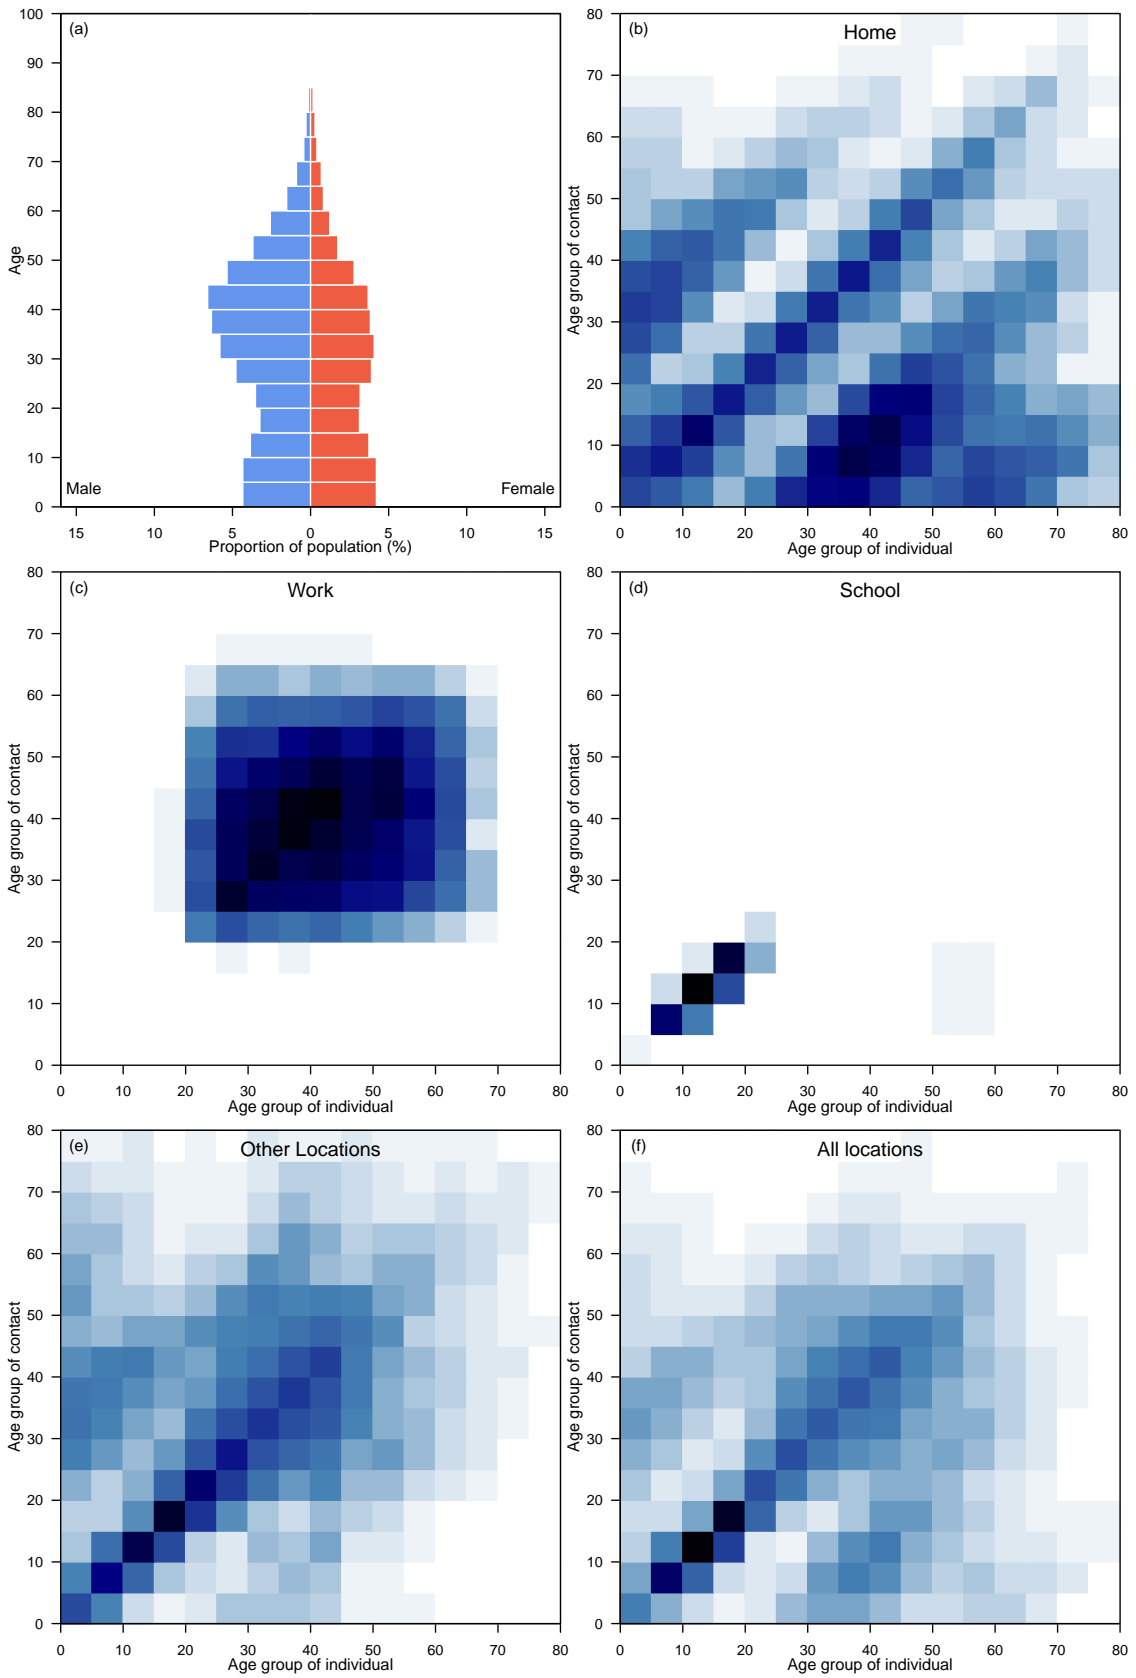



# Senegal

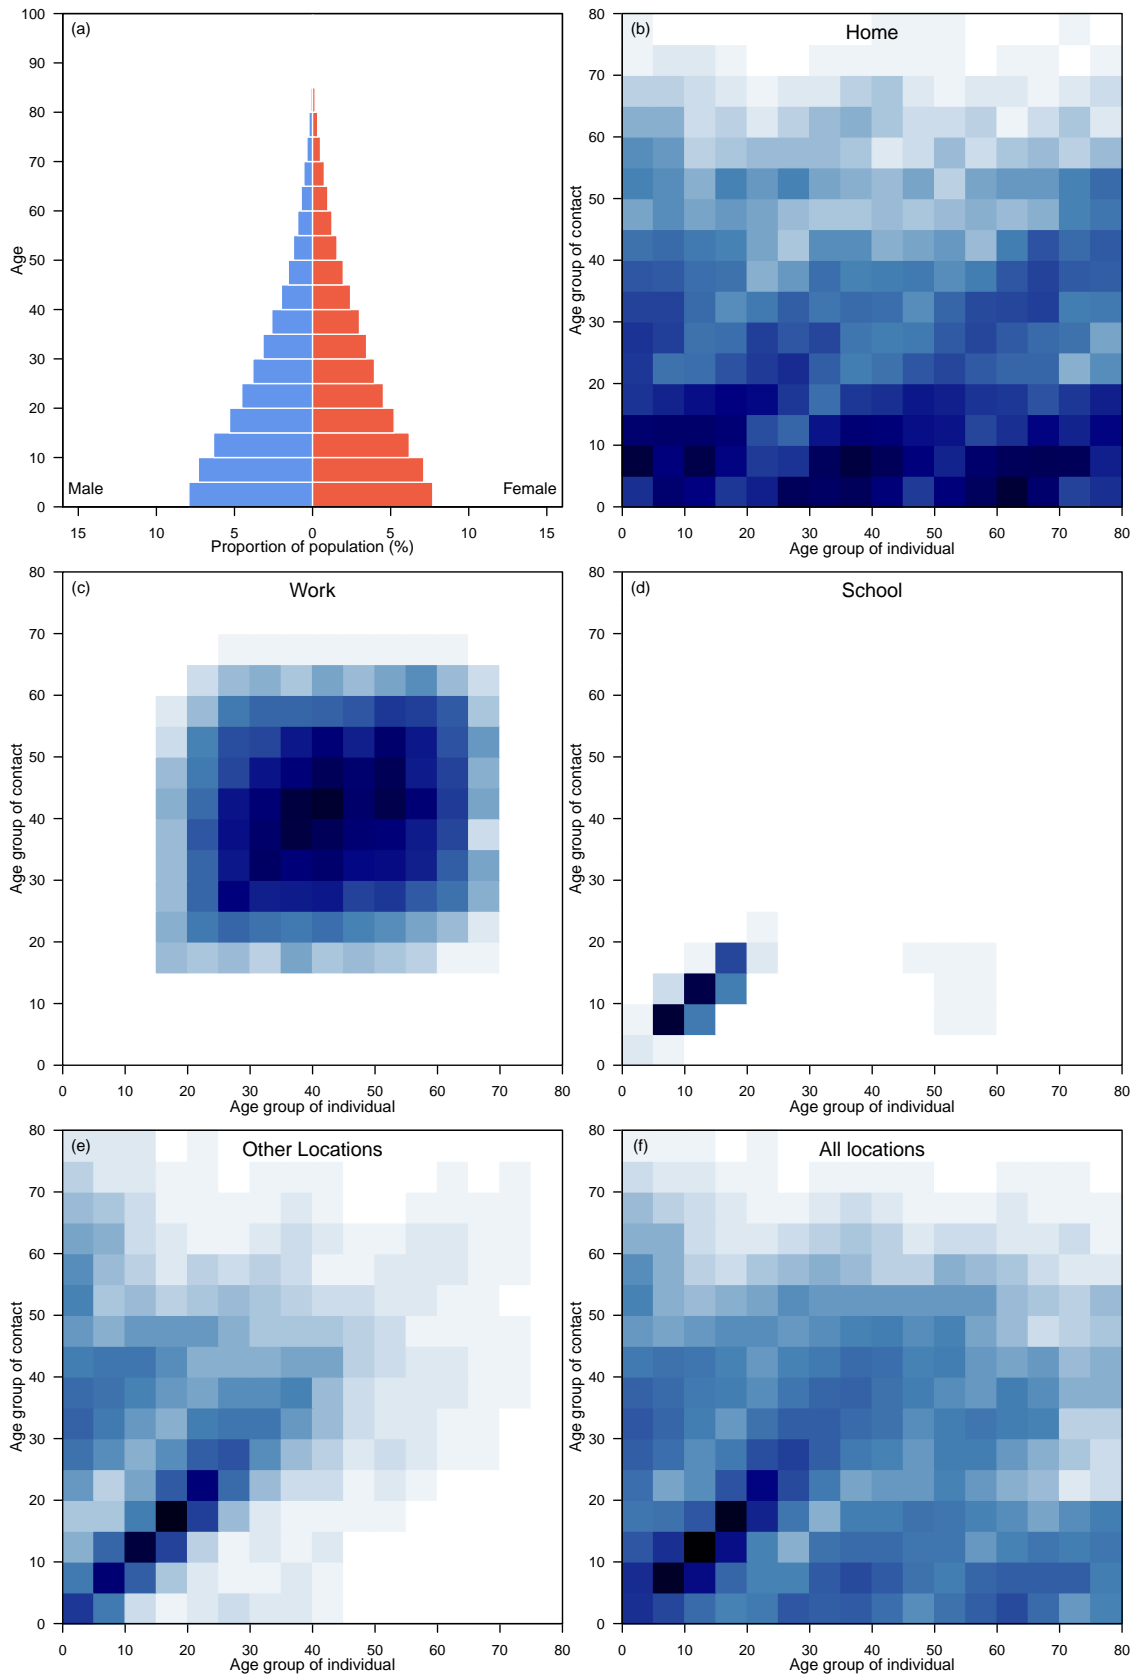

# Serbia

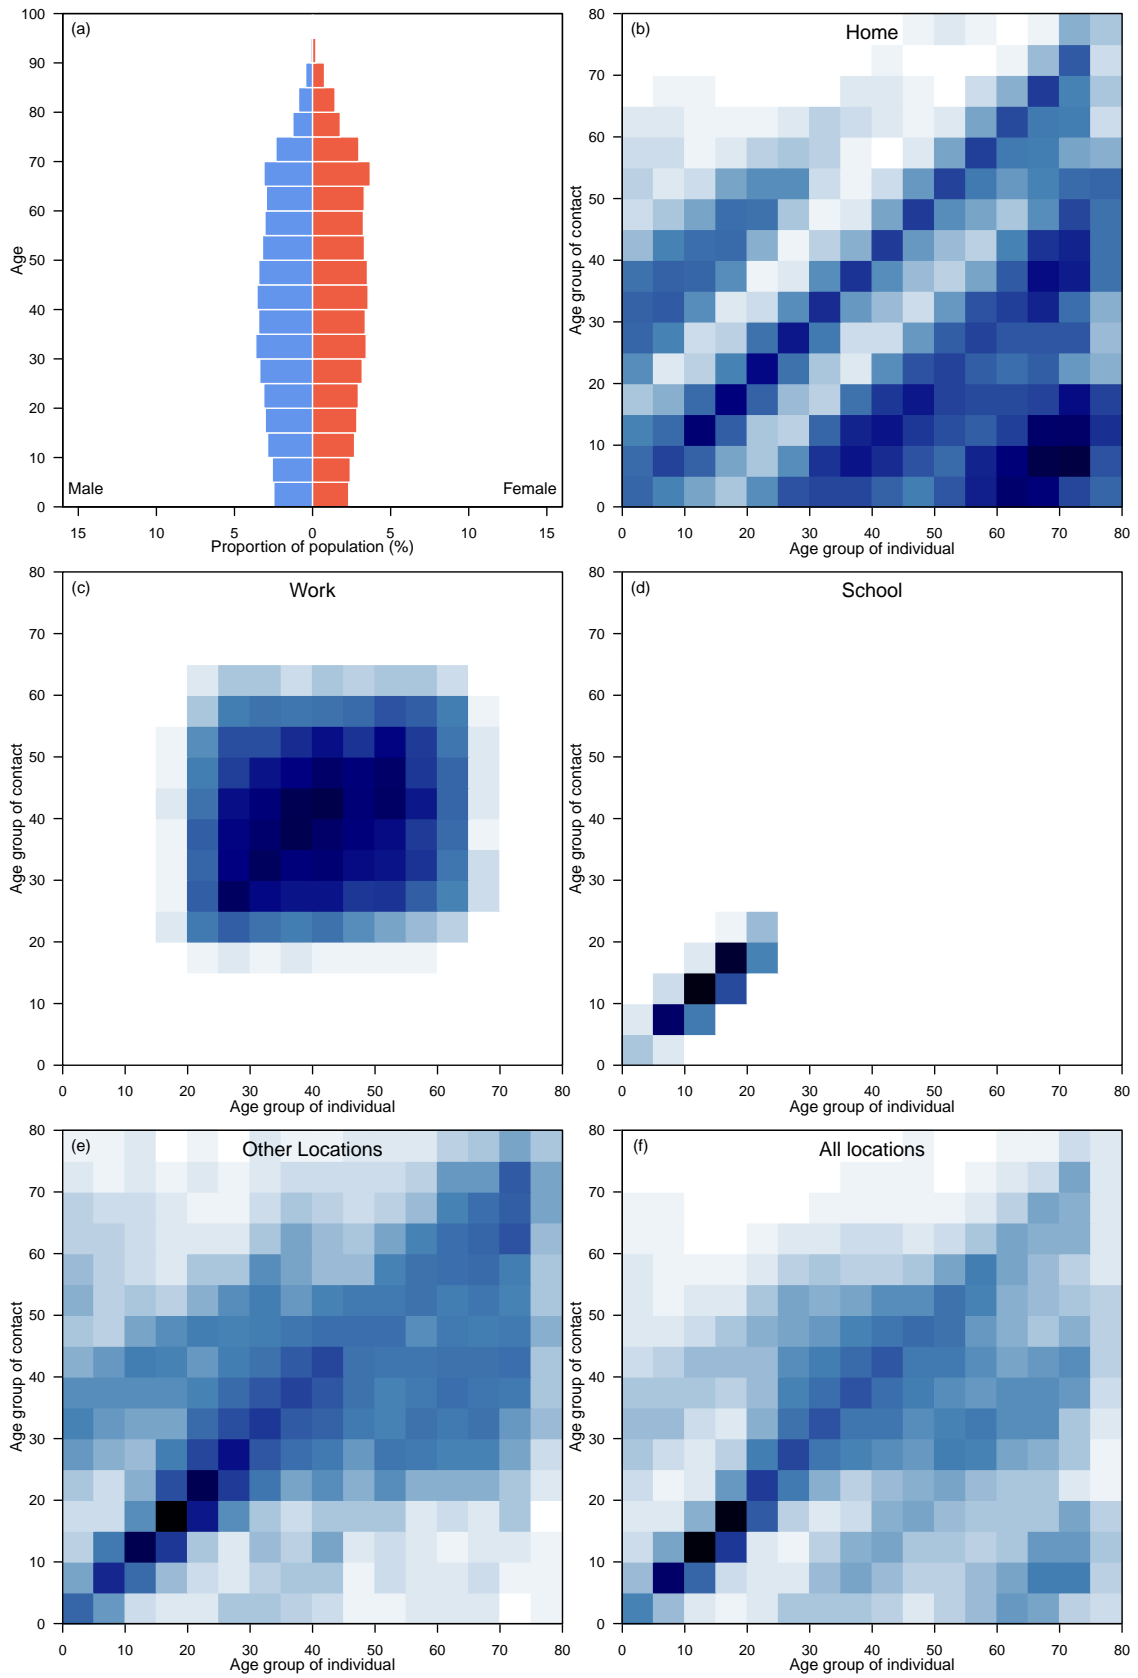

# Sierra Leone

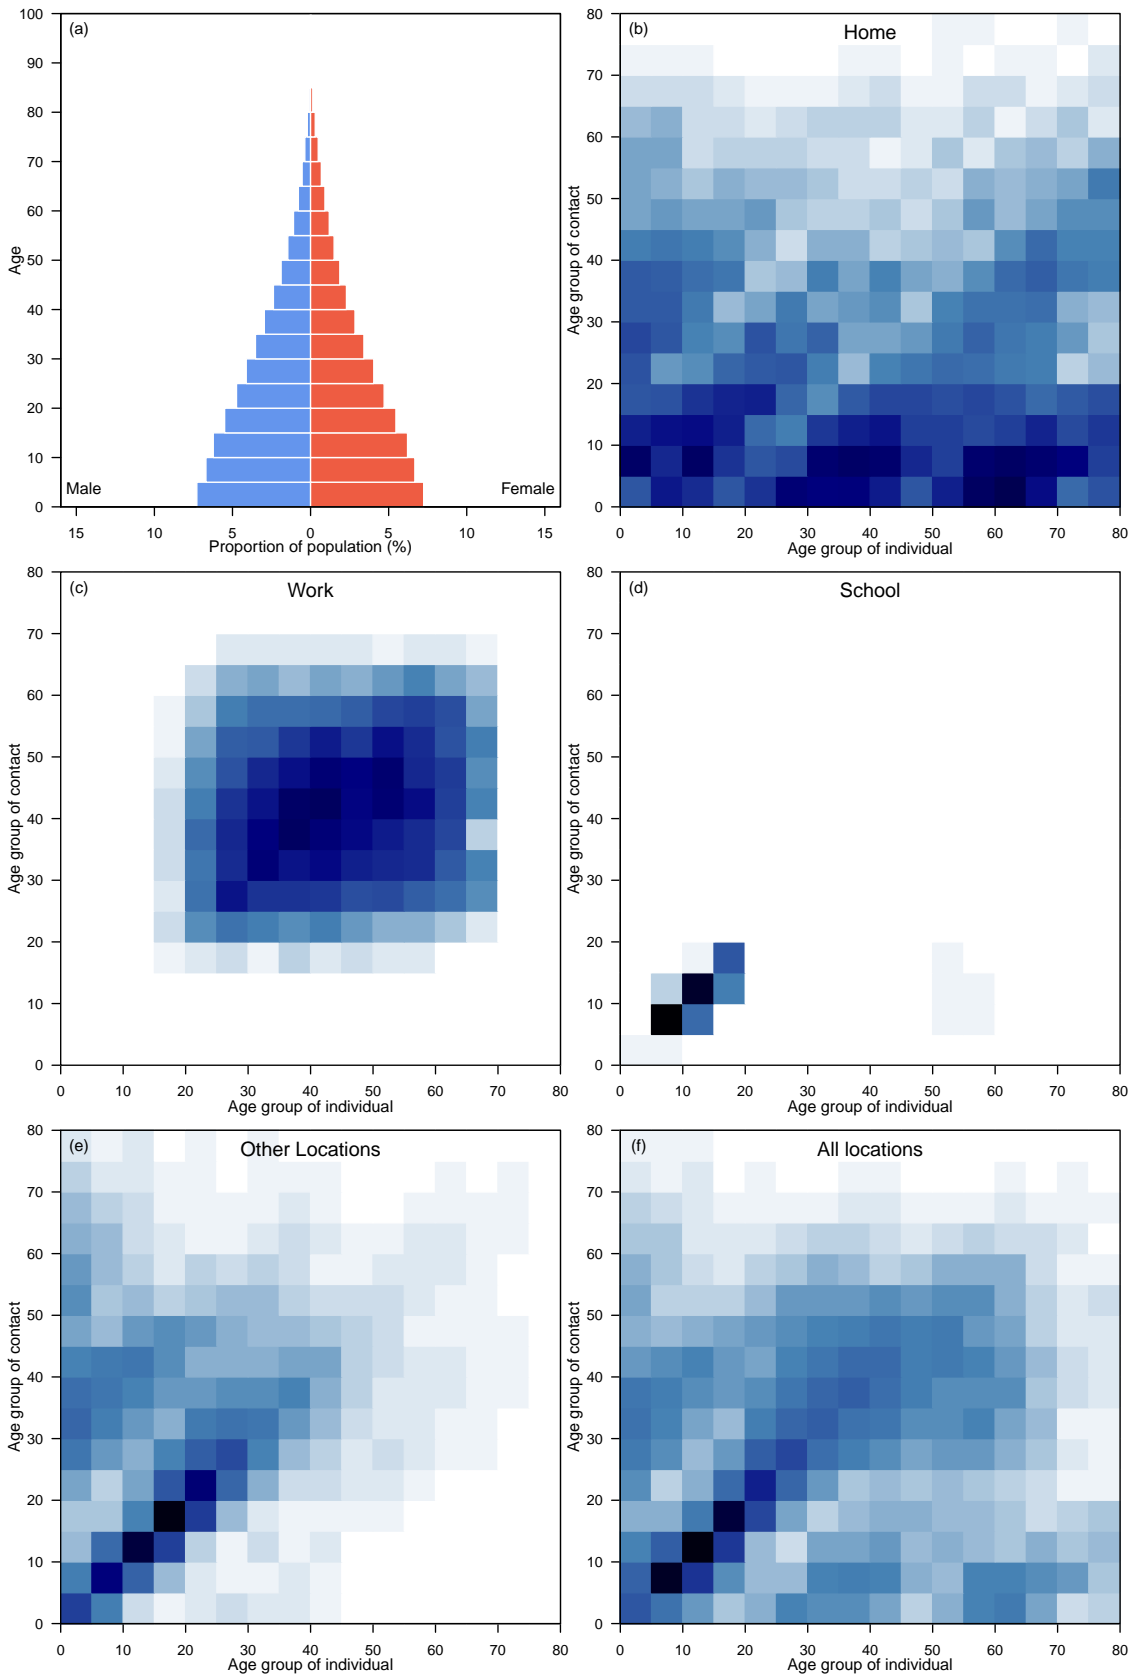

# Singapore

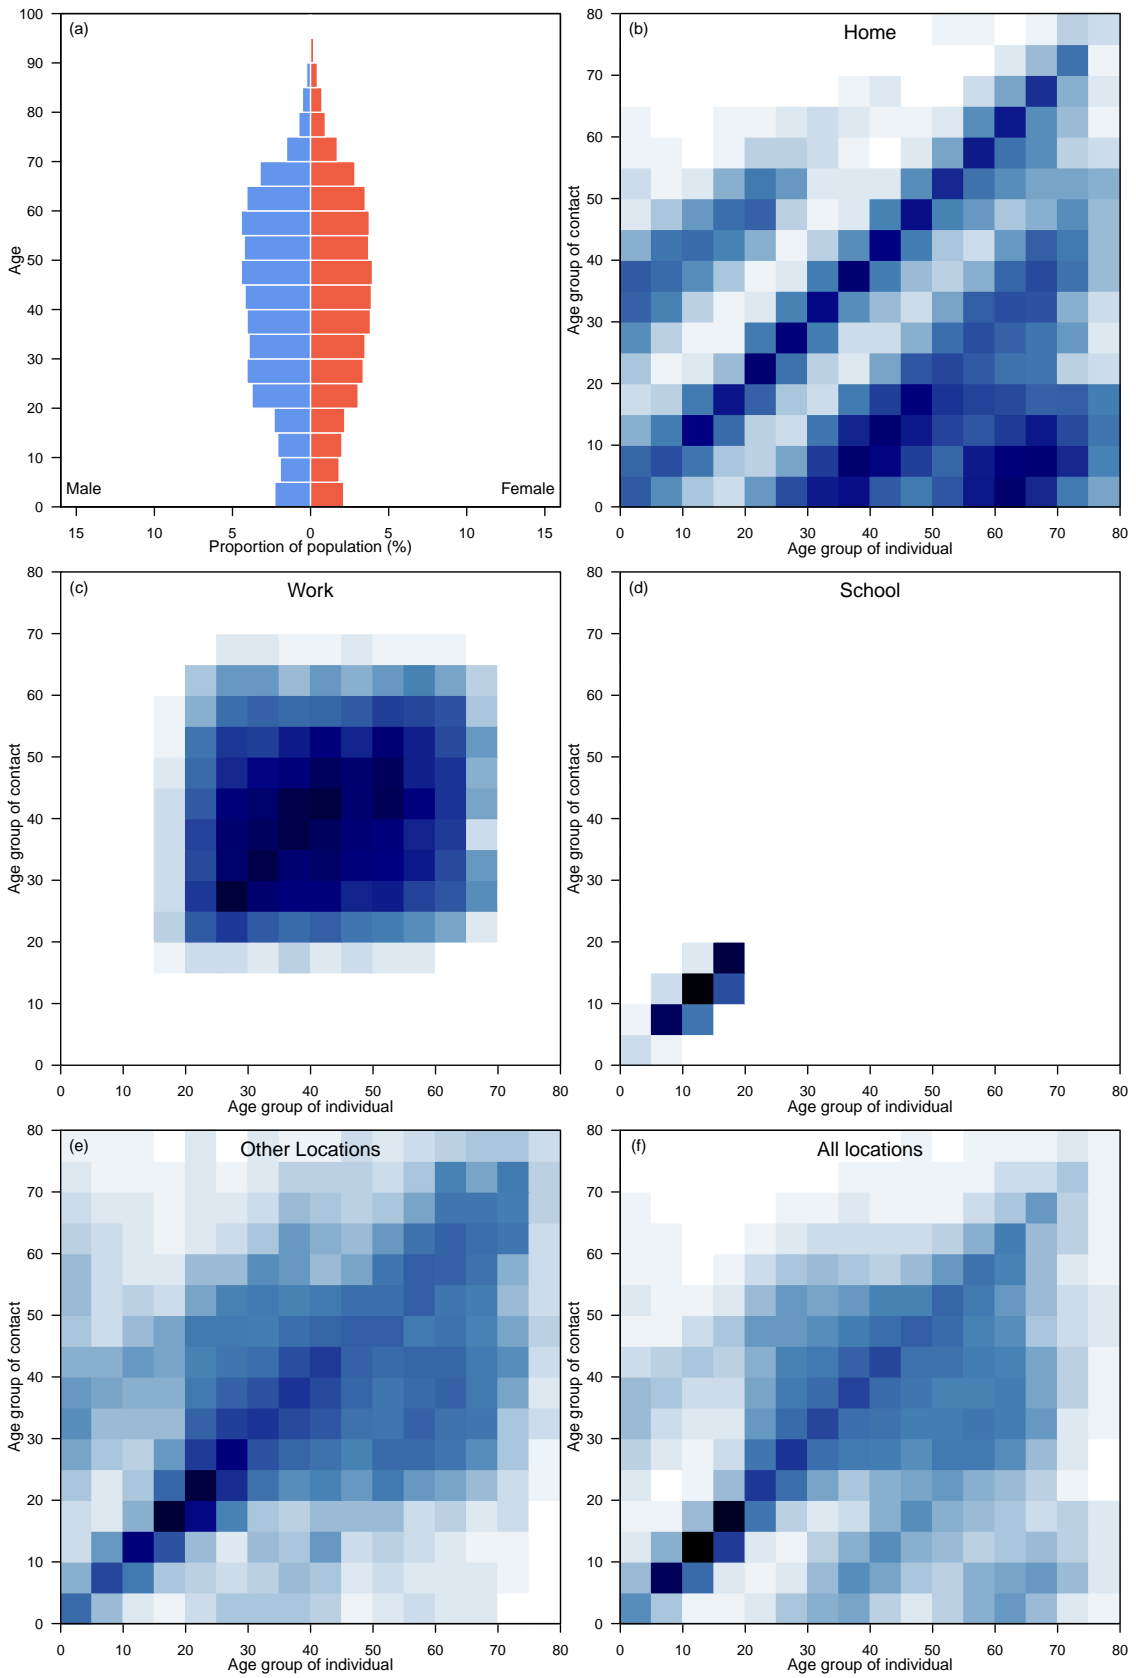

# Slovakia

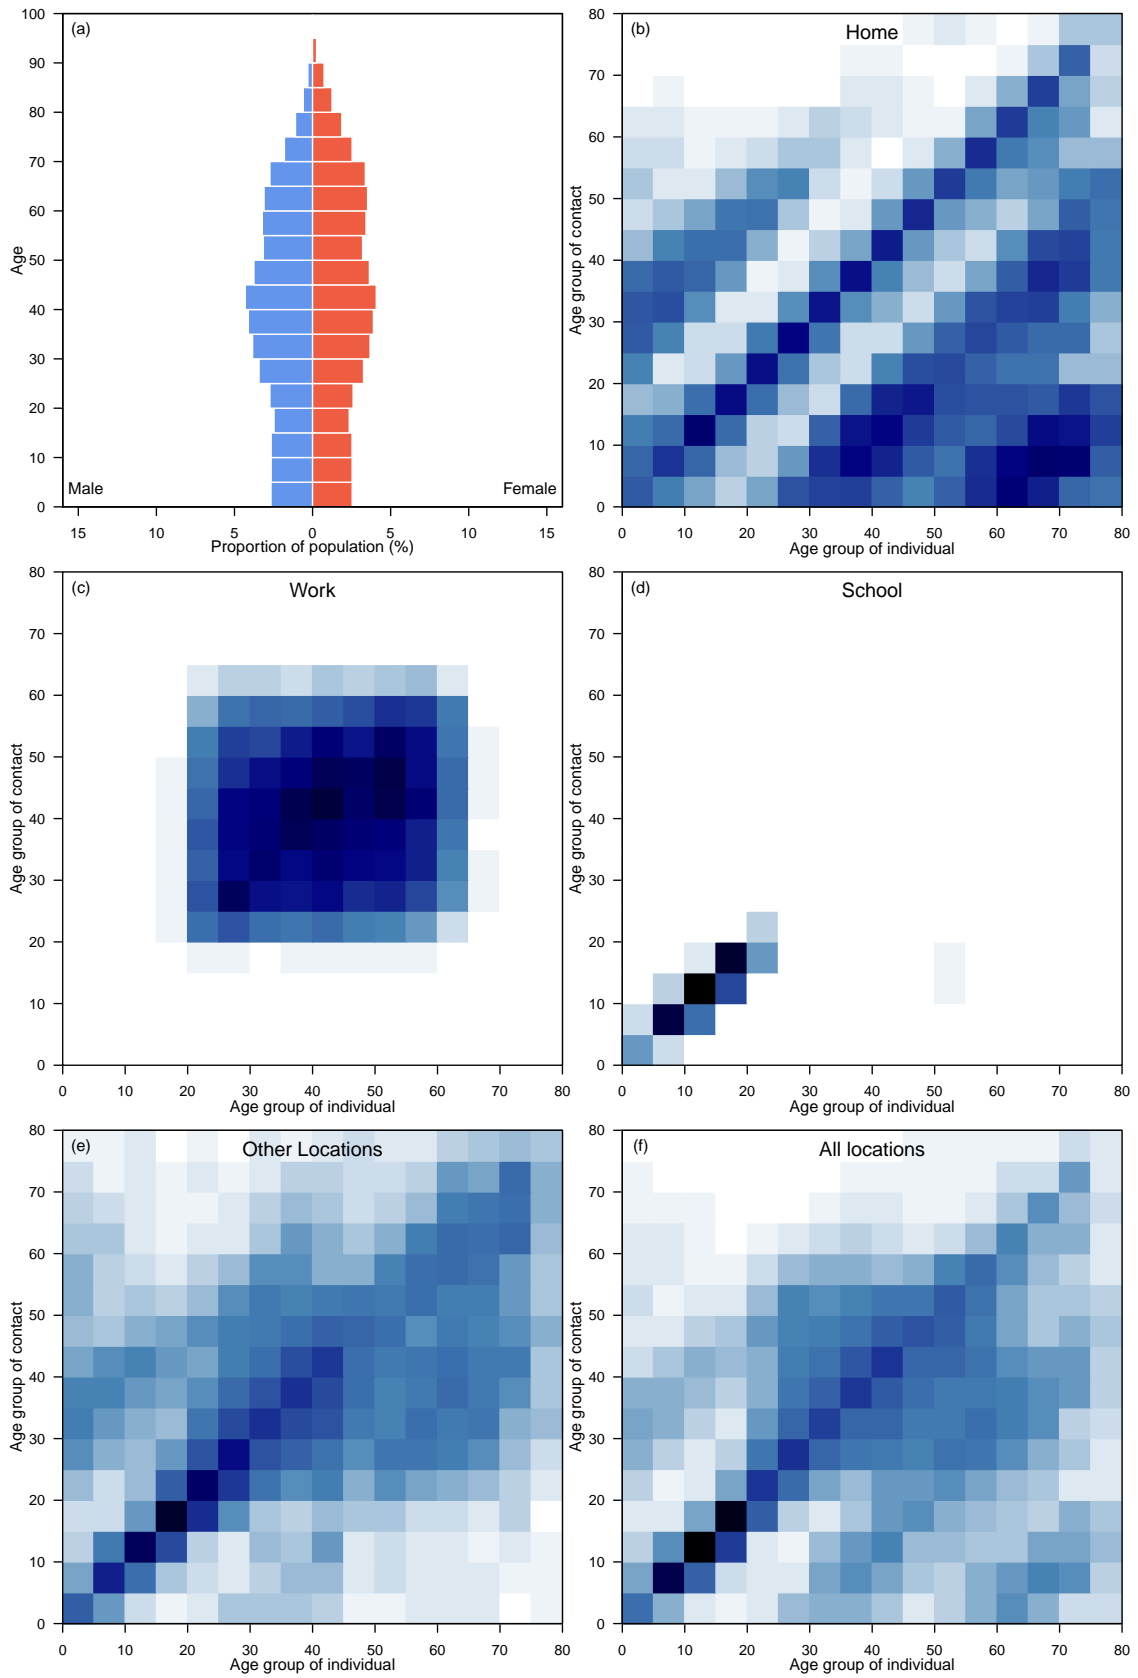

# Slovenia

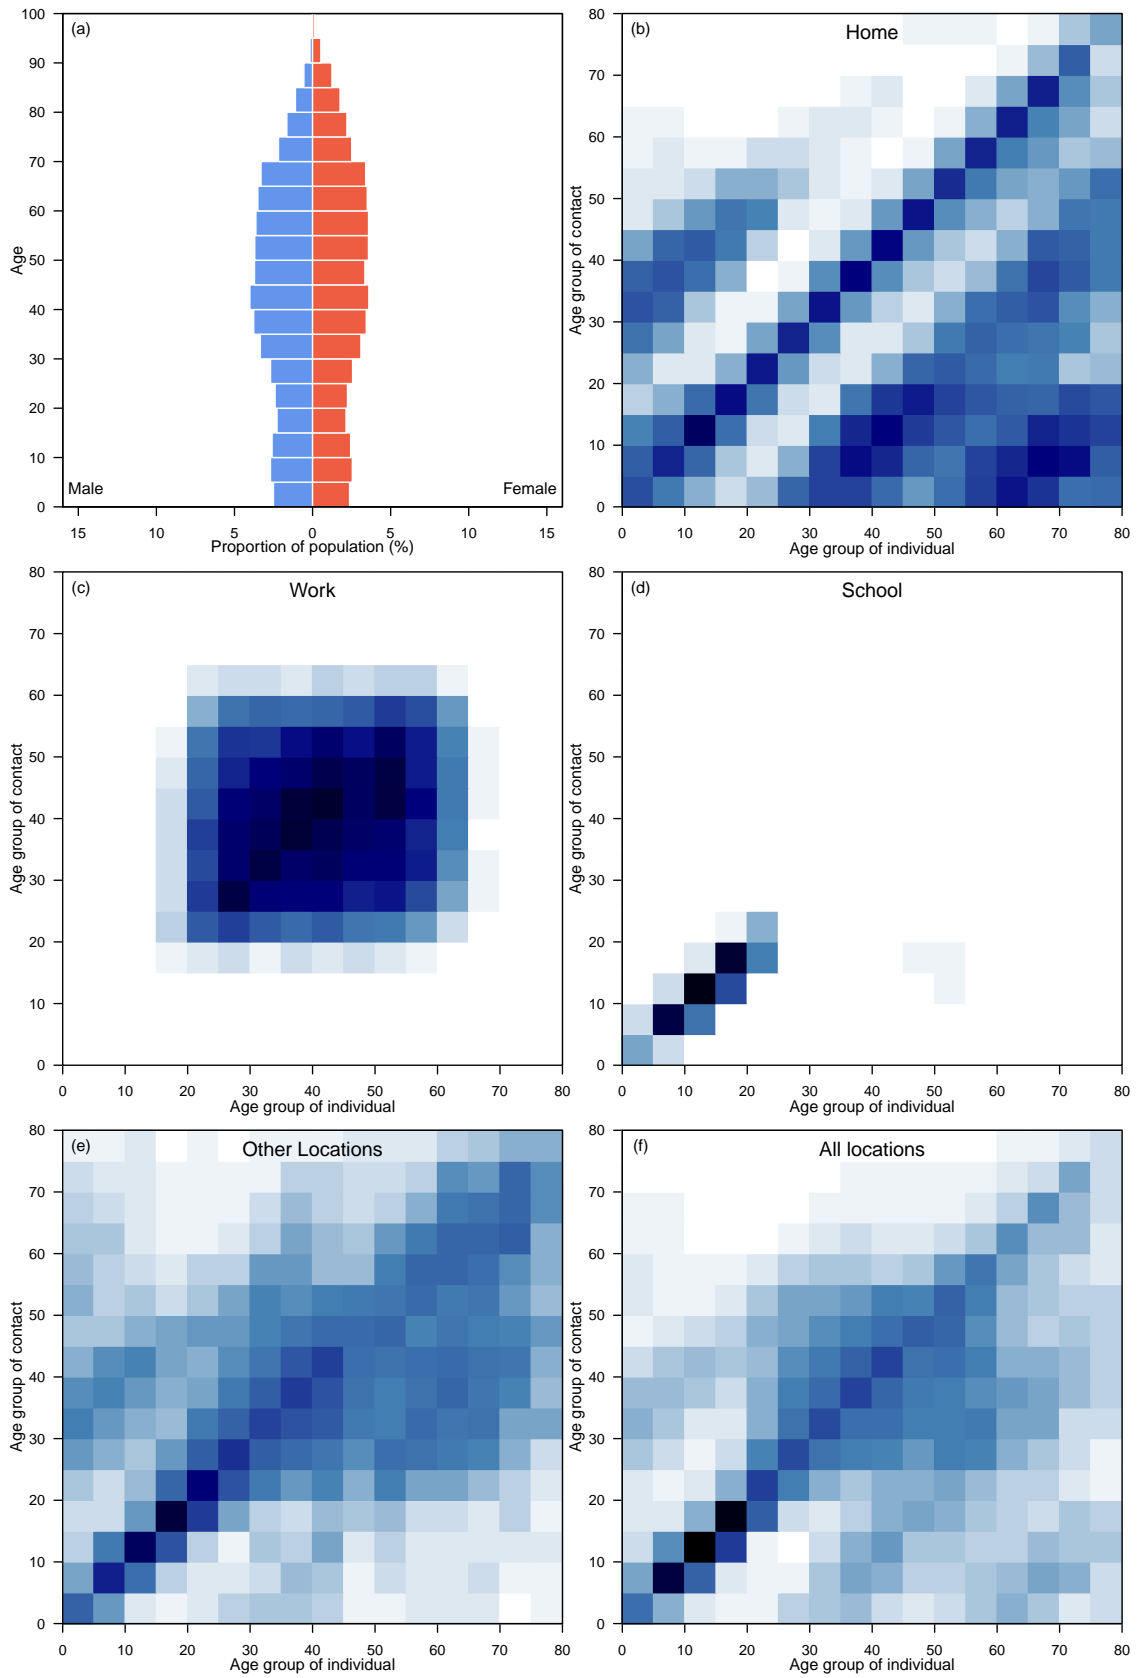

# Solomon Islands

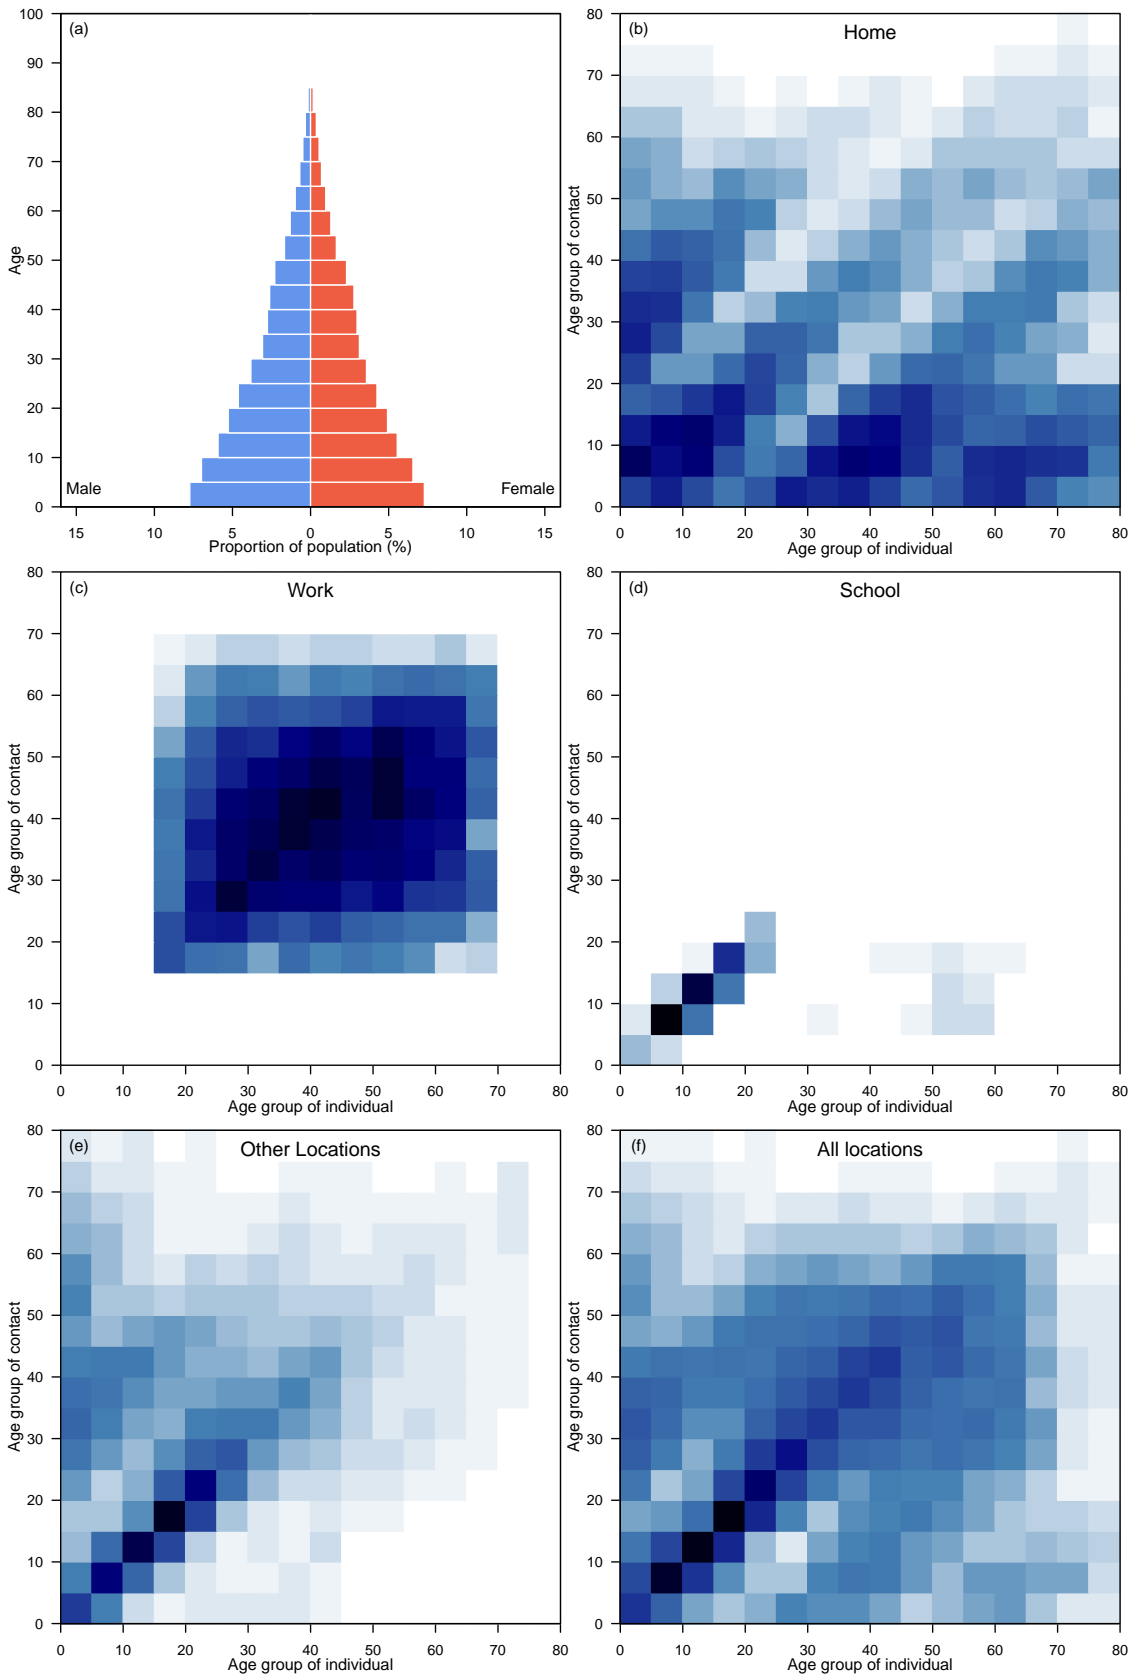

# South Africa

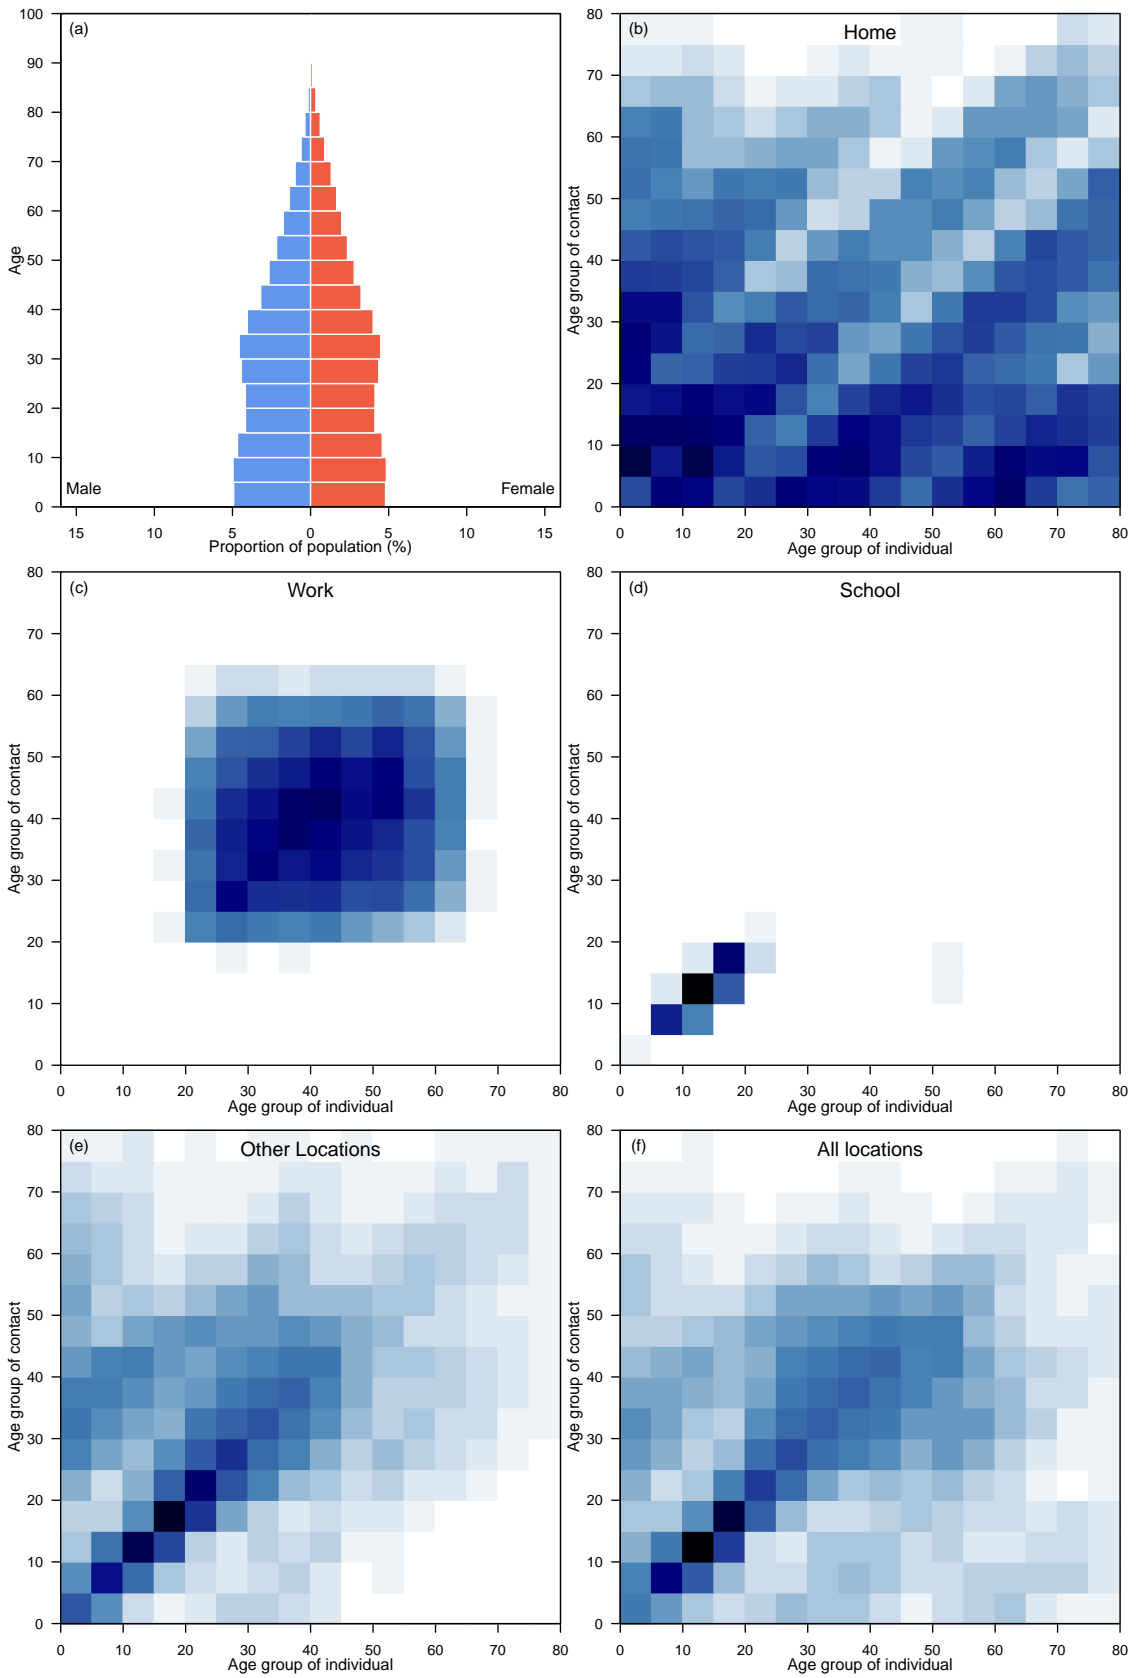



# South Sudan

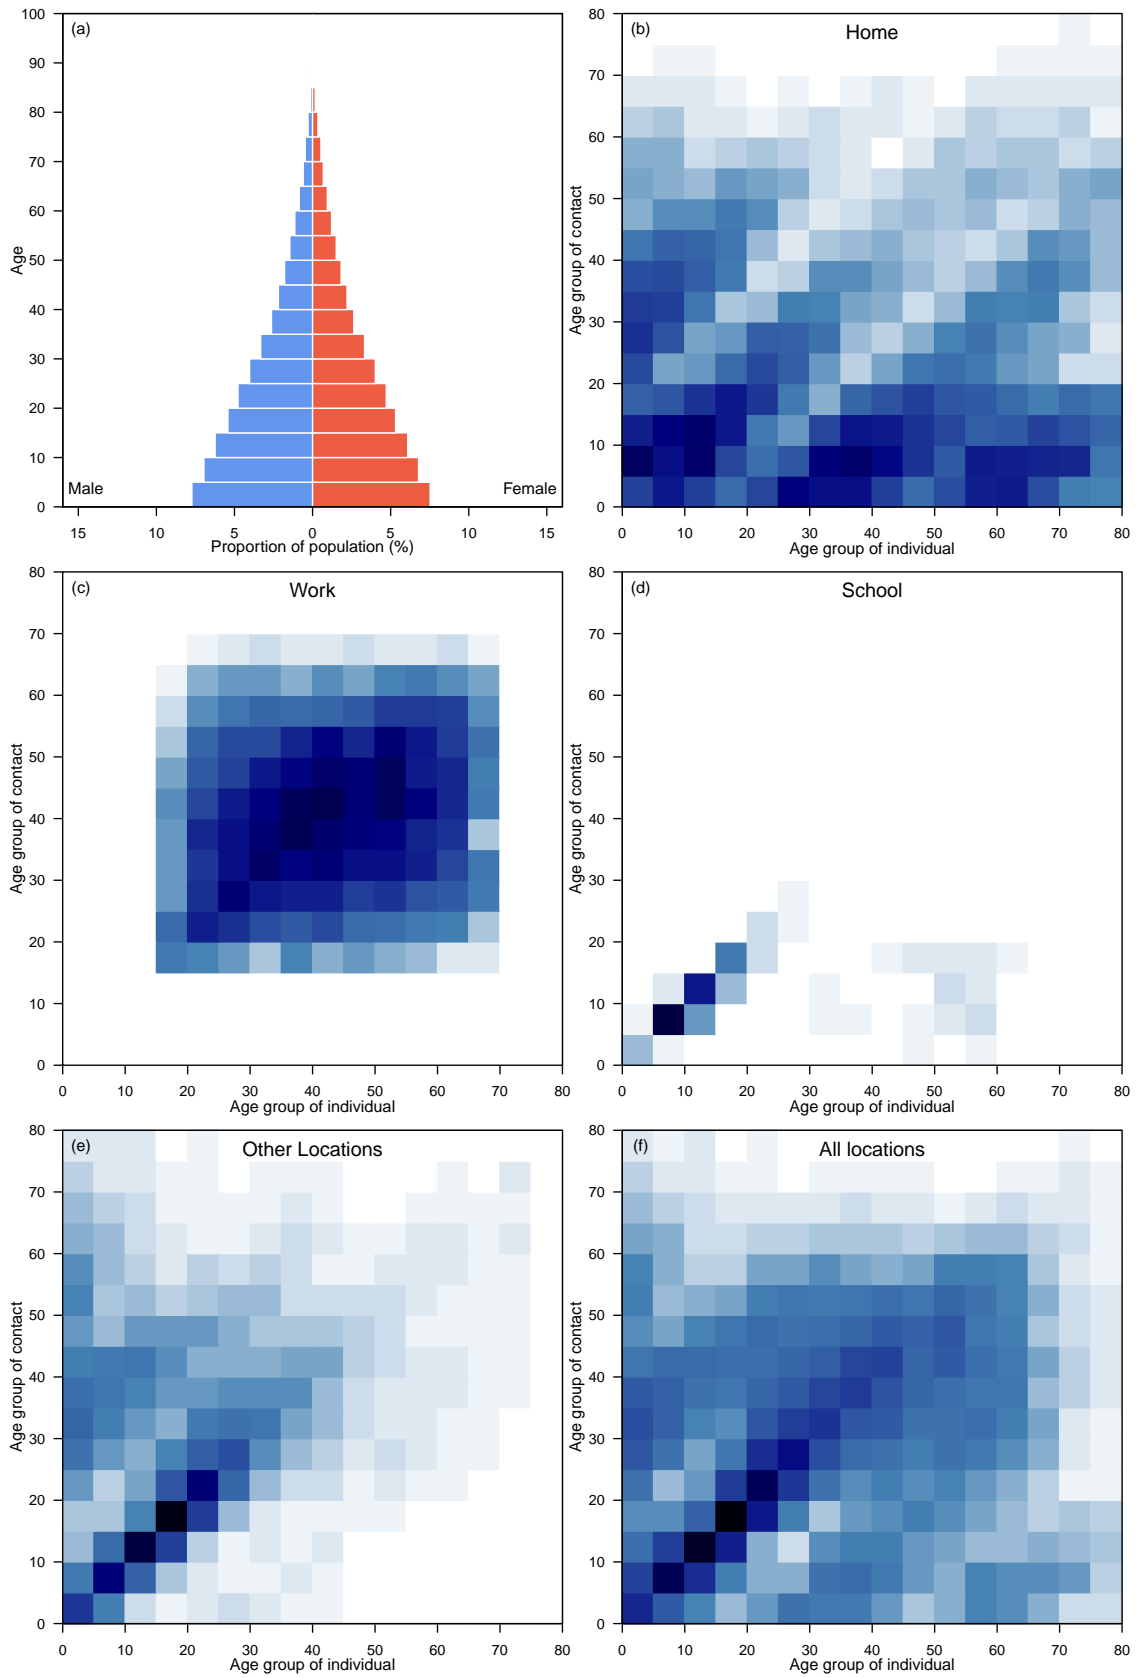

# Spain

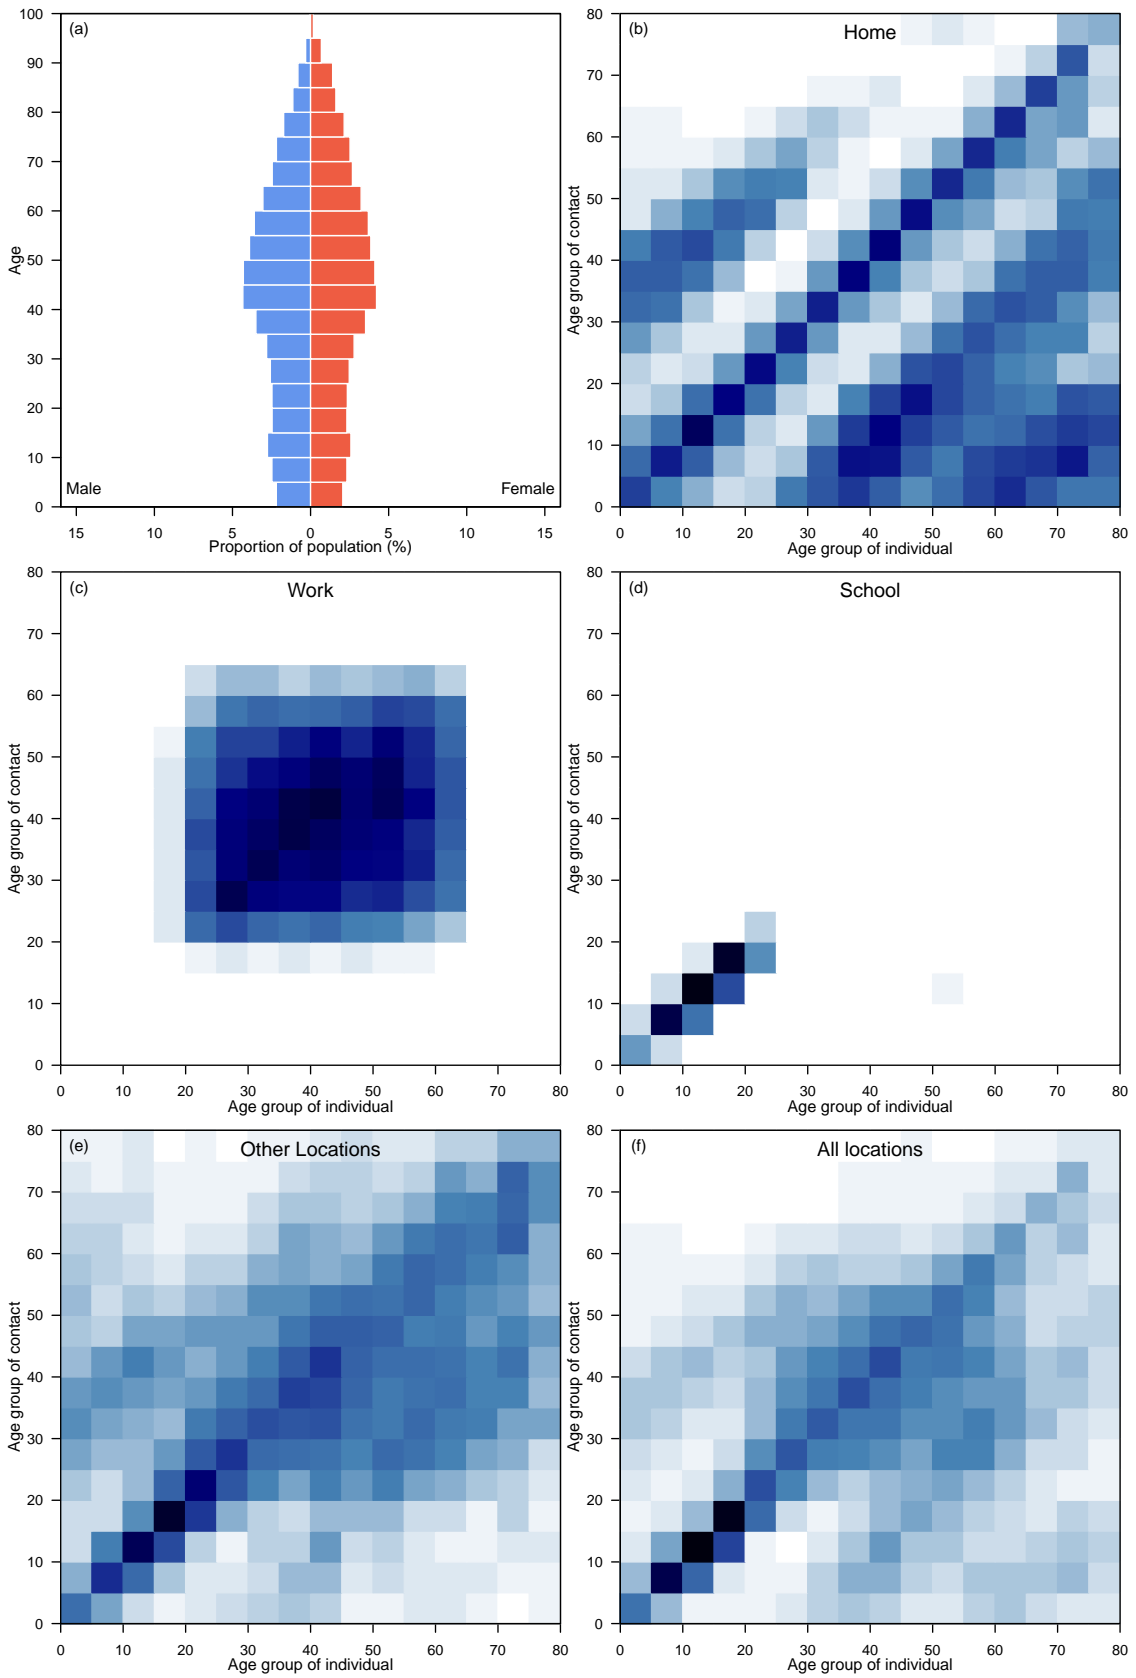

# Sri Lanka

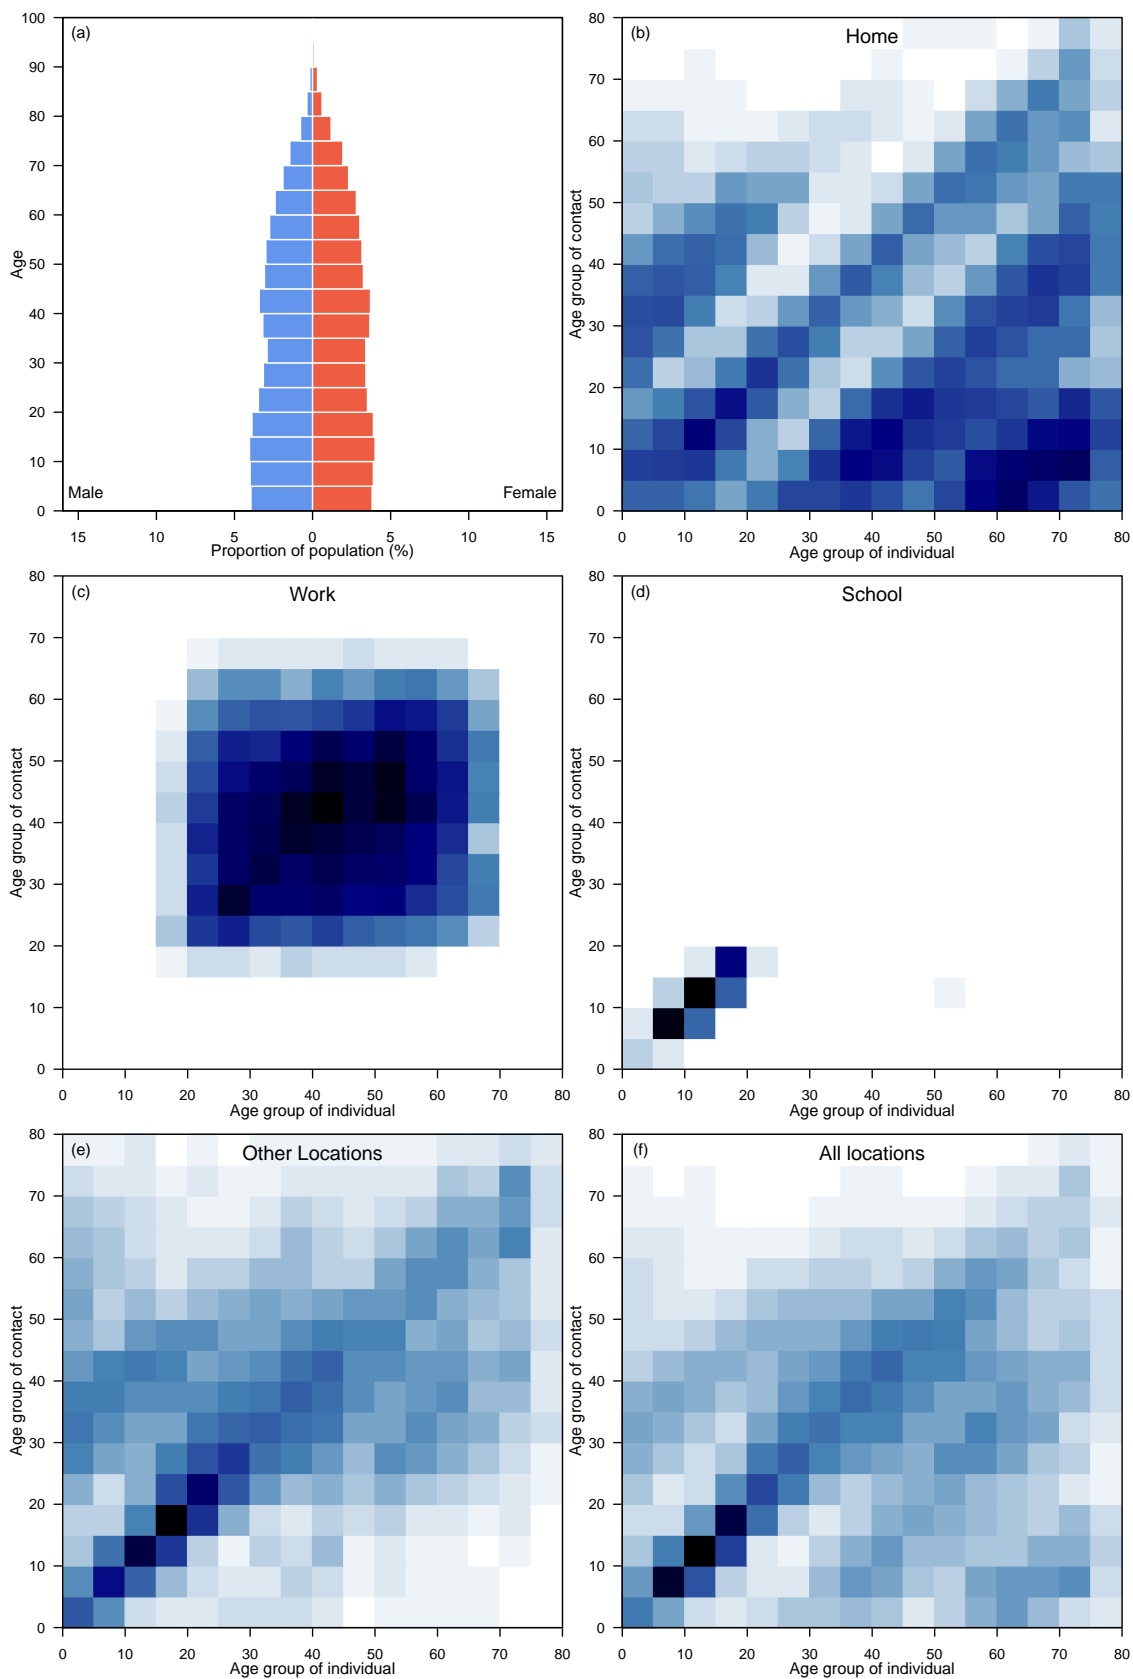

# State of Palestine

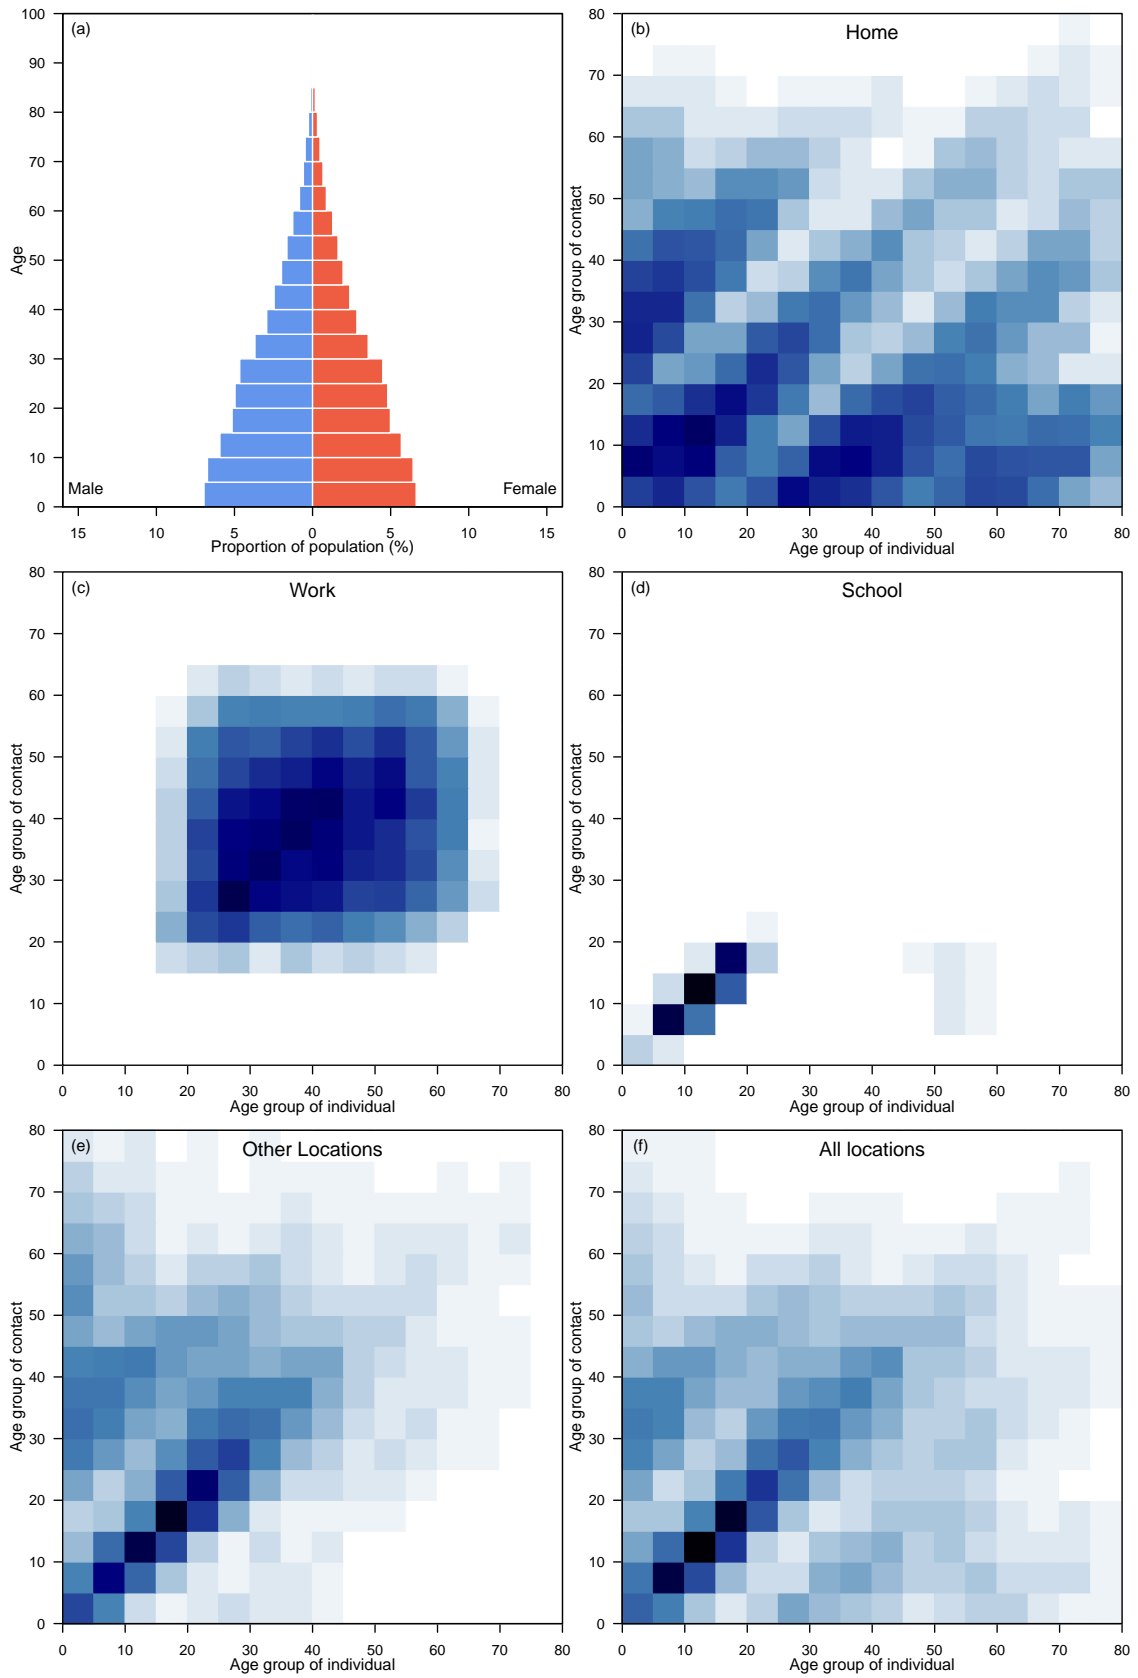

# Sudan

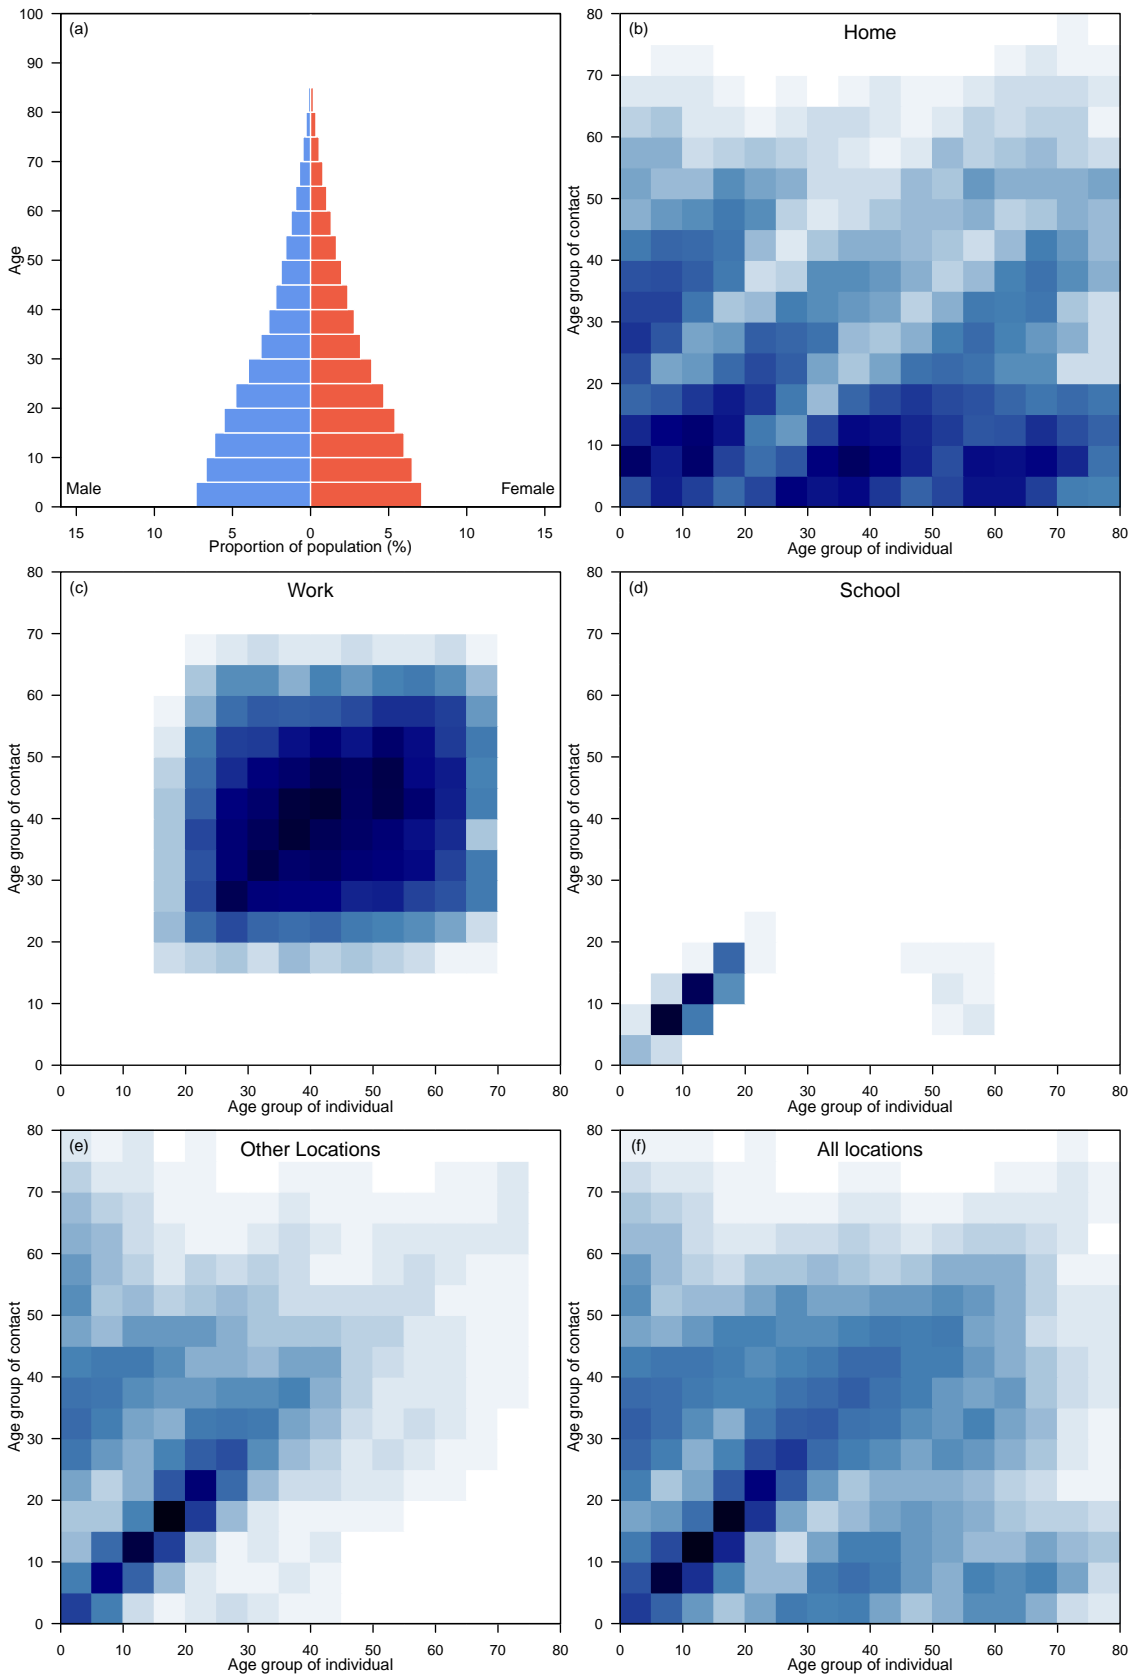

# Suriname

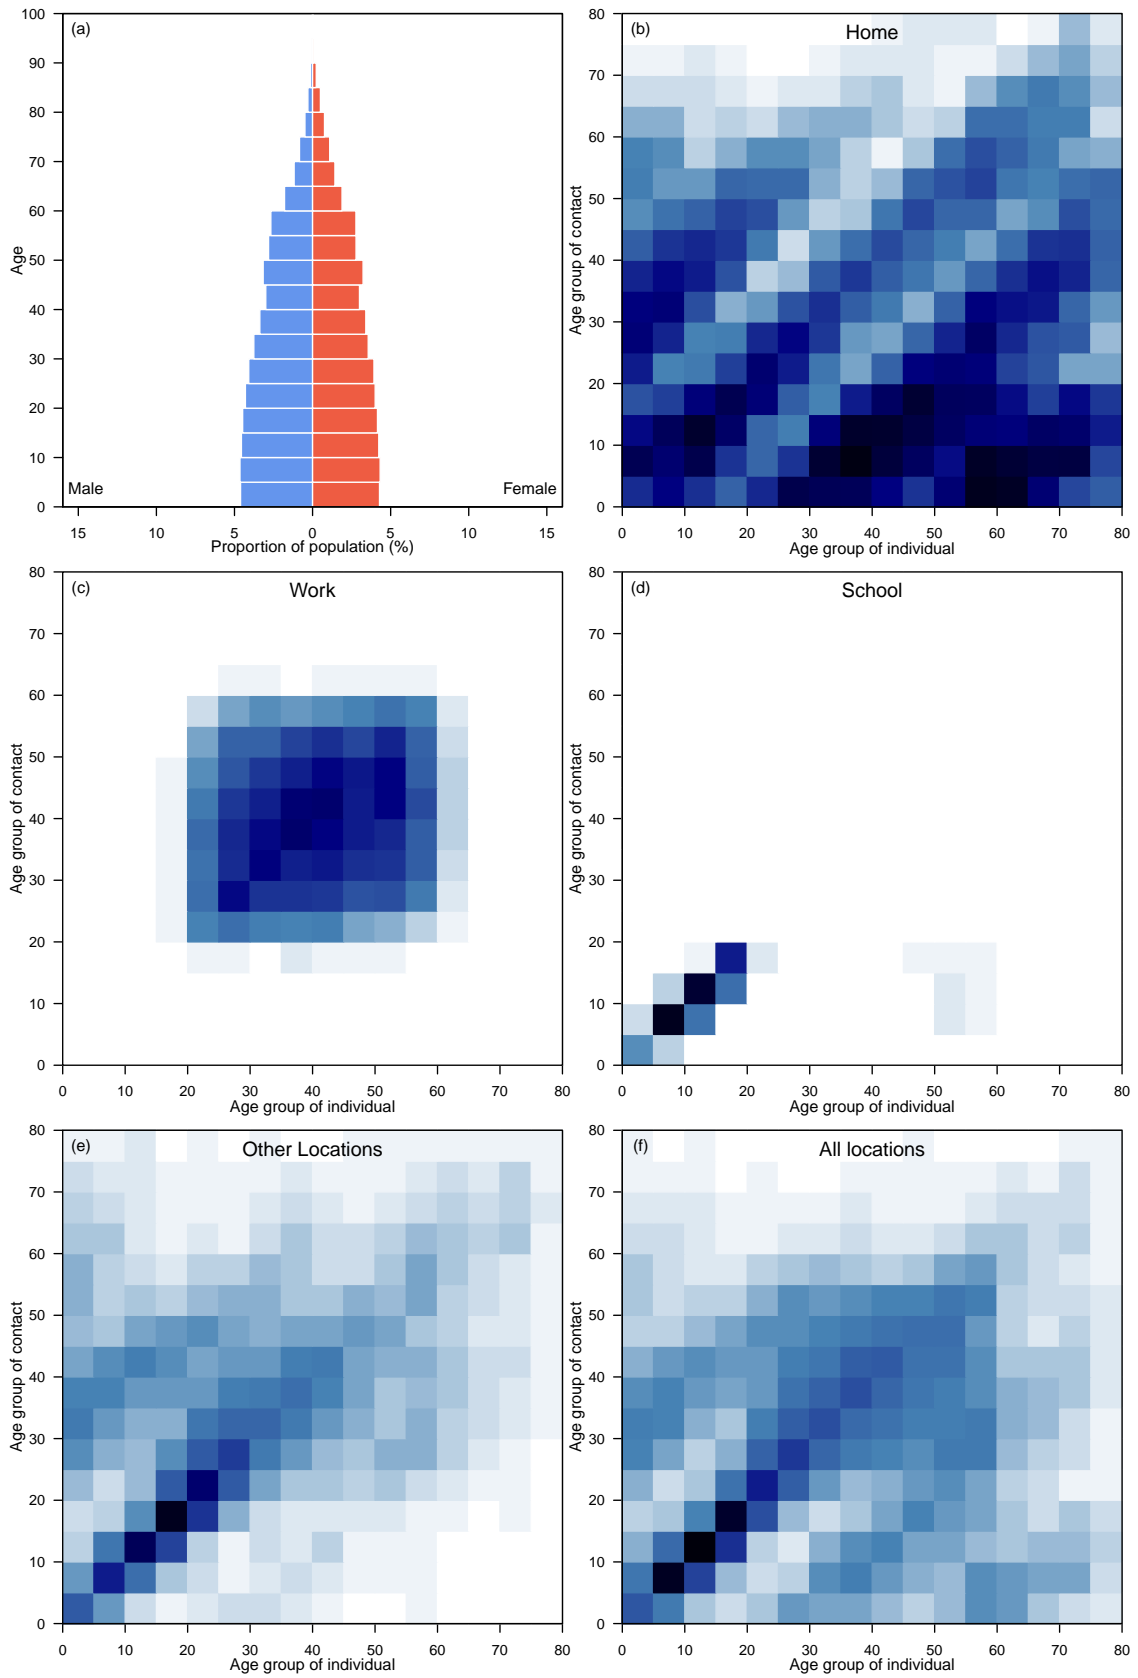

# Sweden

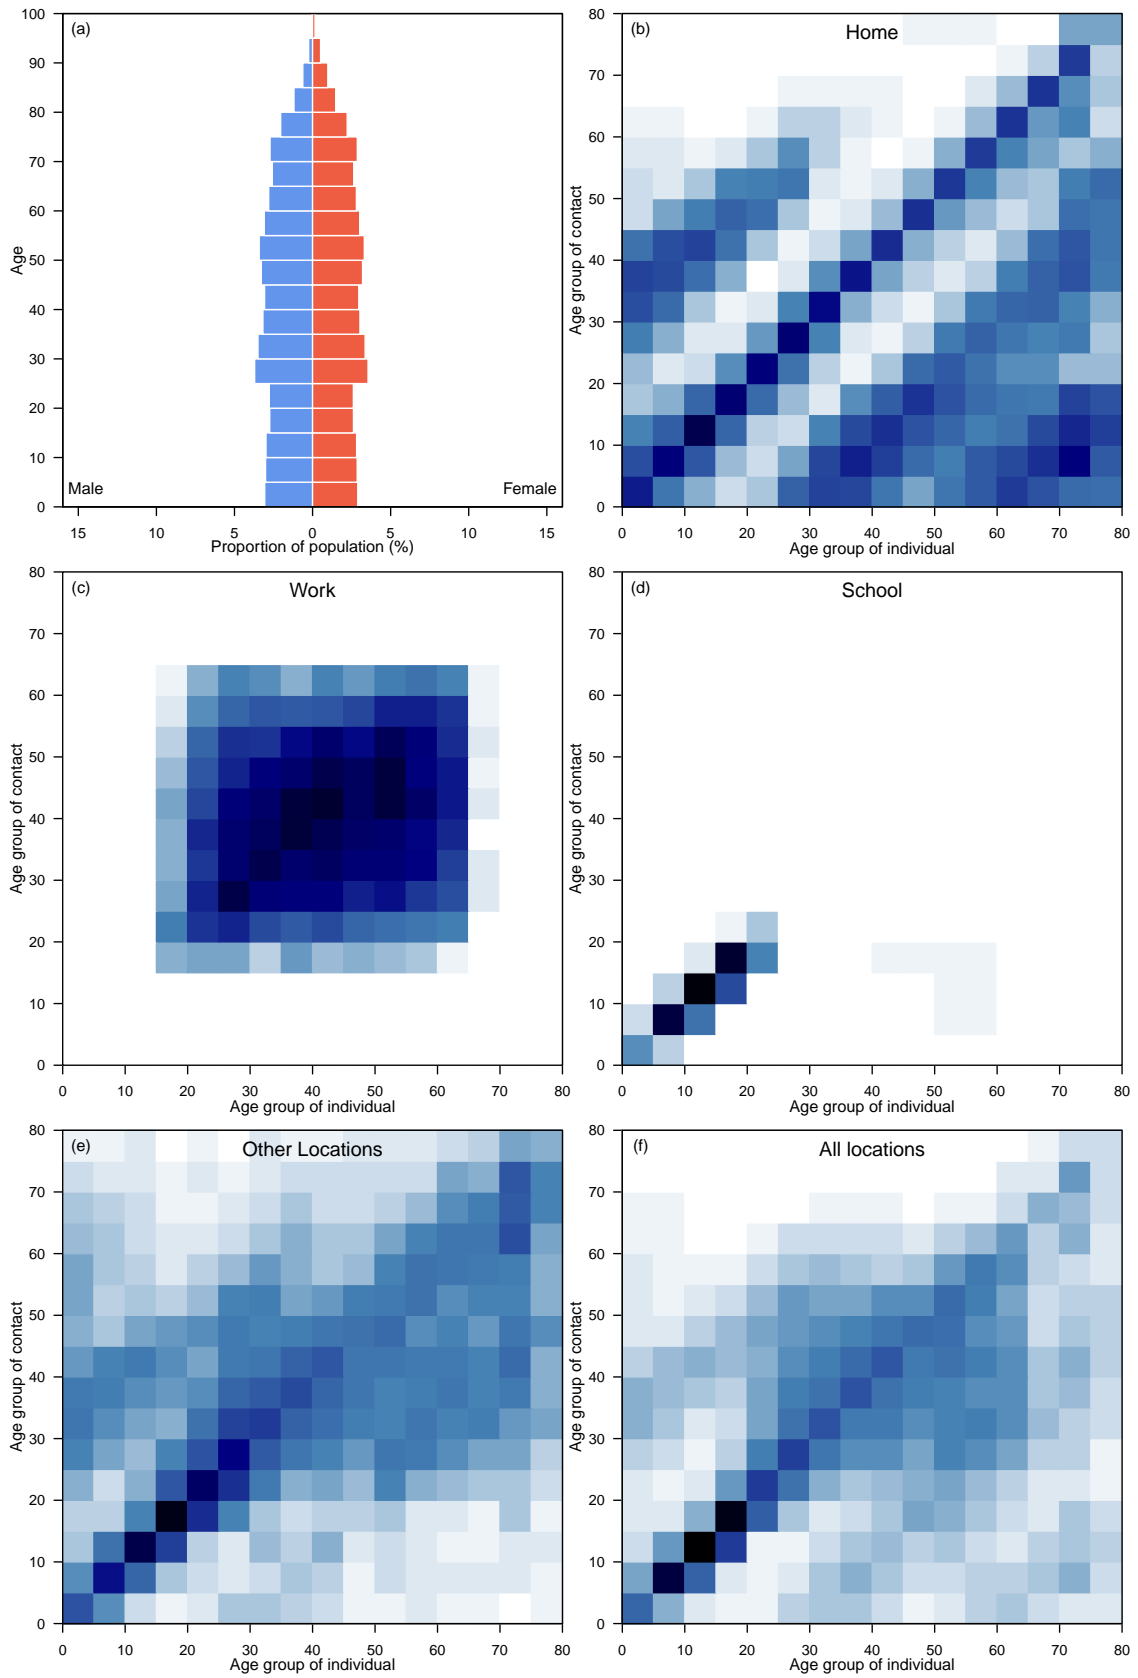

# Switzerland

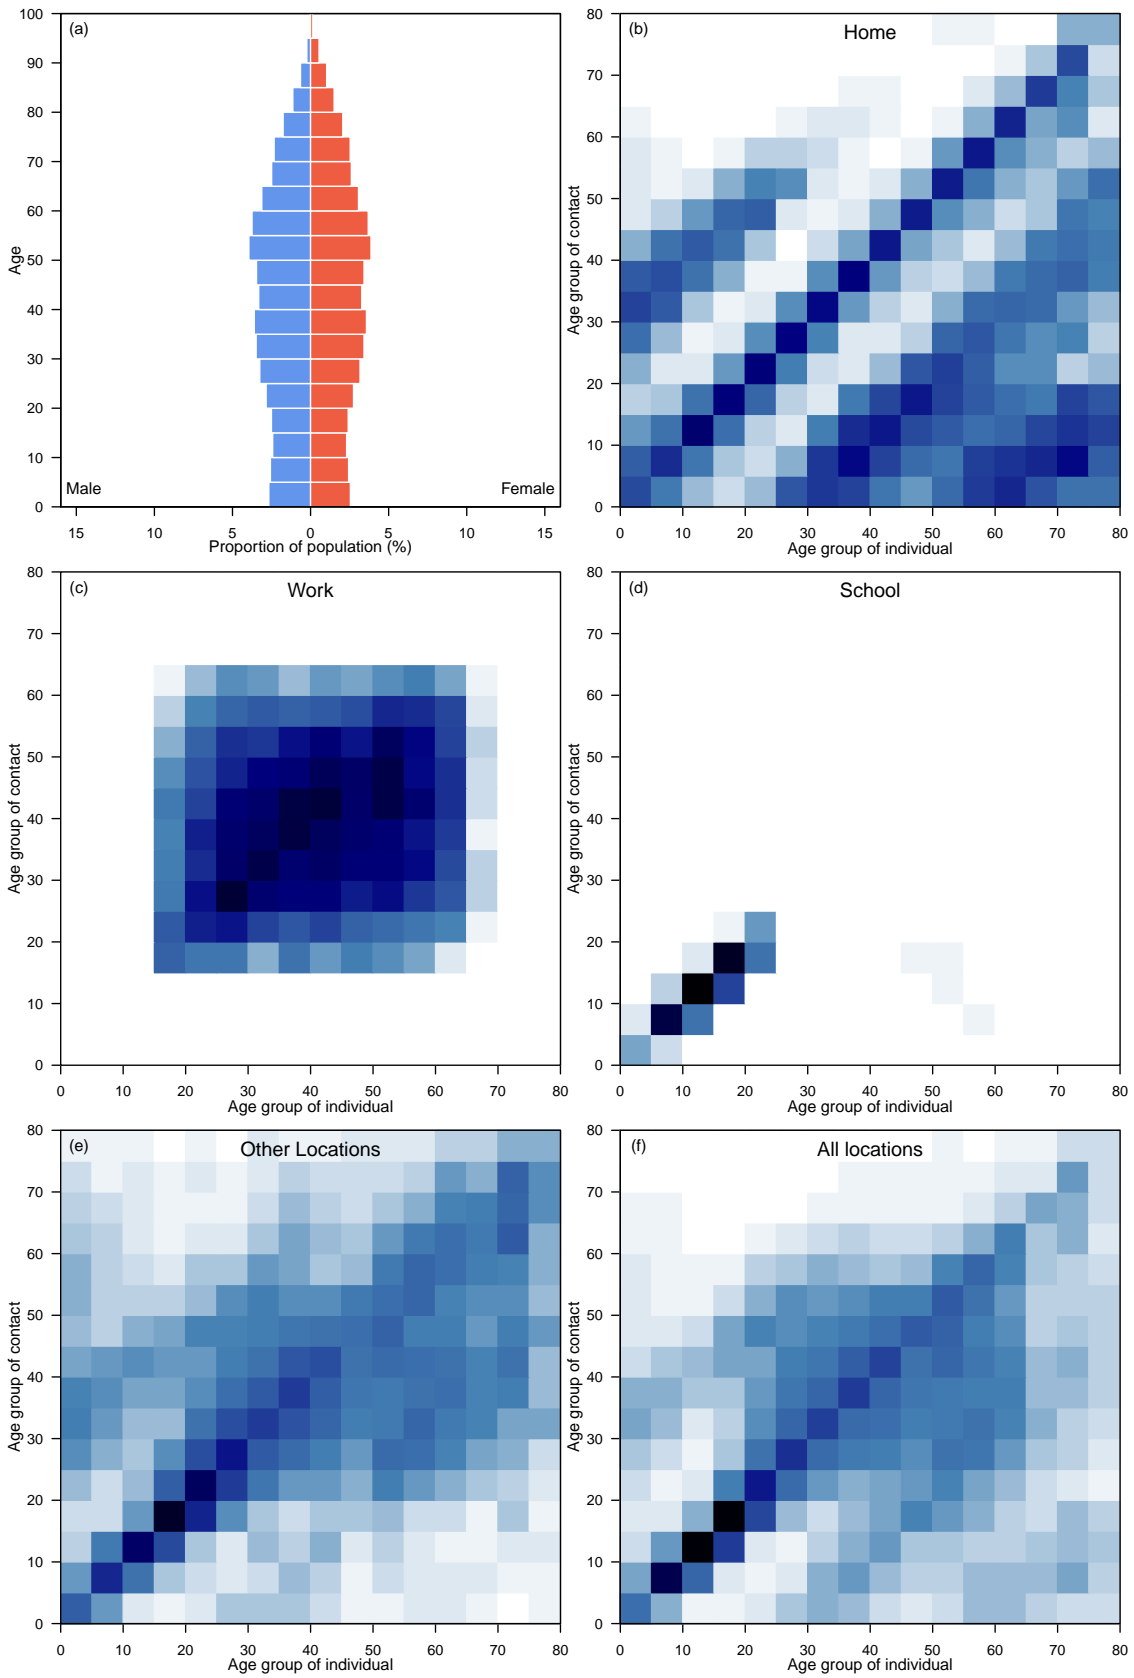



# Syrian Arab Republic

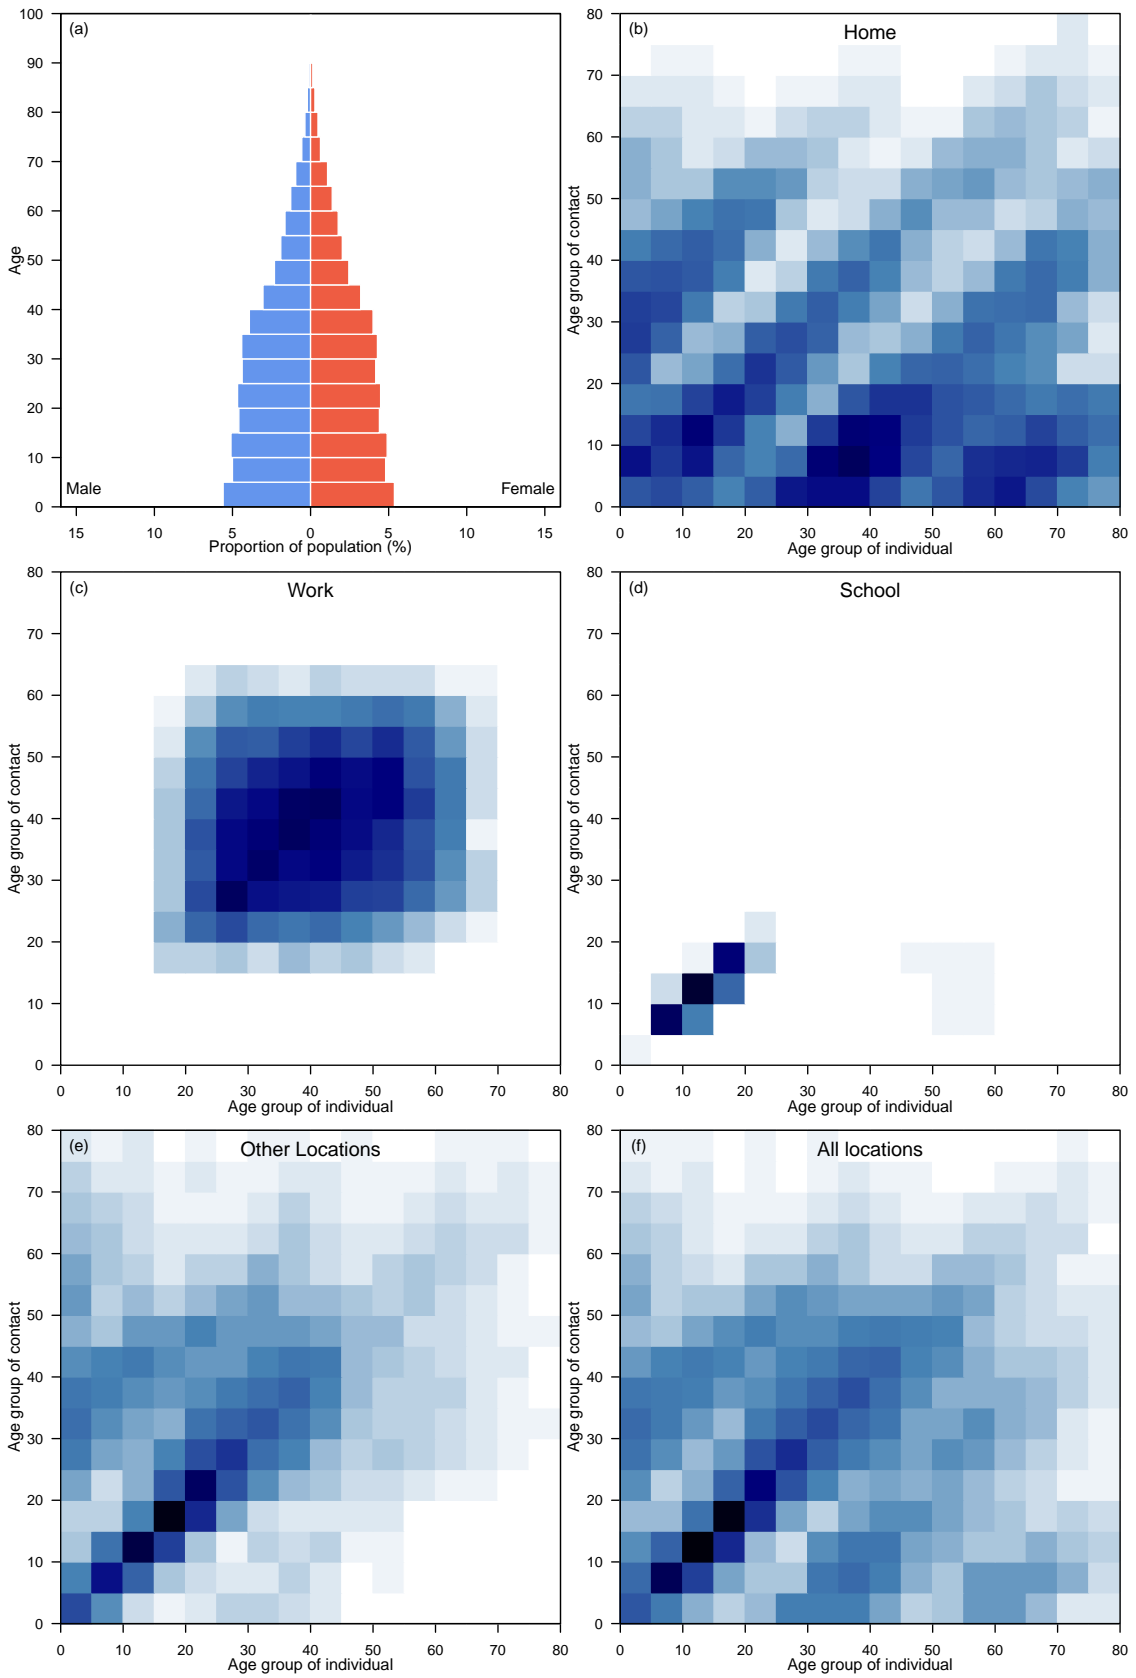

# Tajikistan

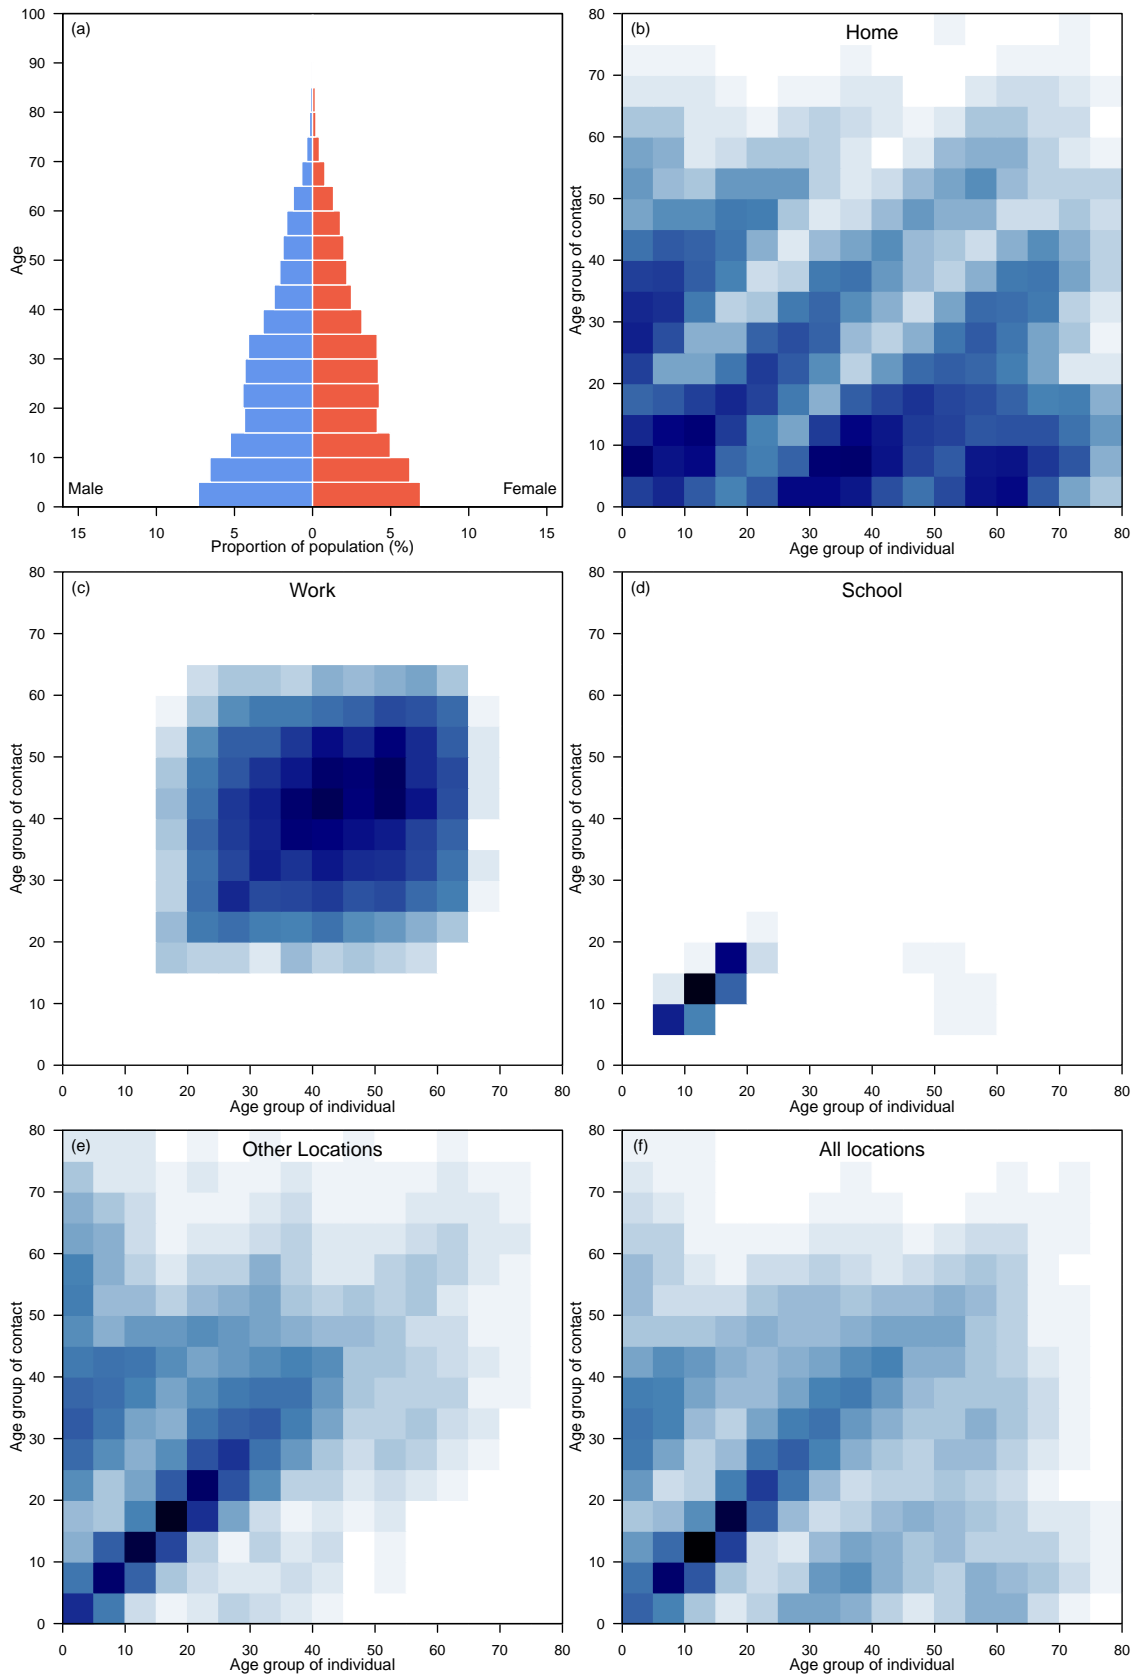

# Thailand

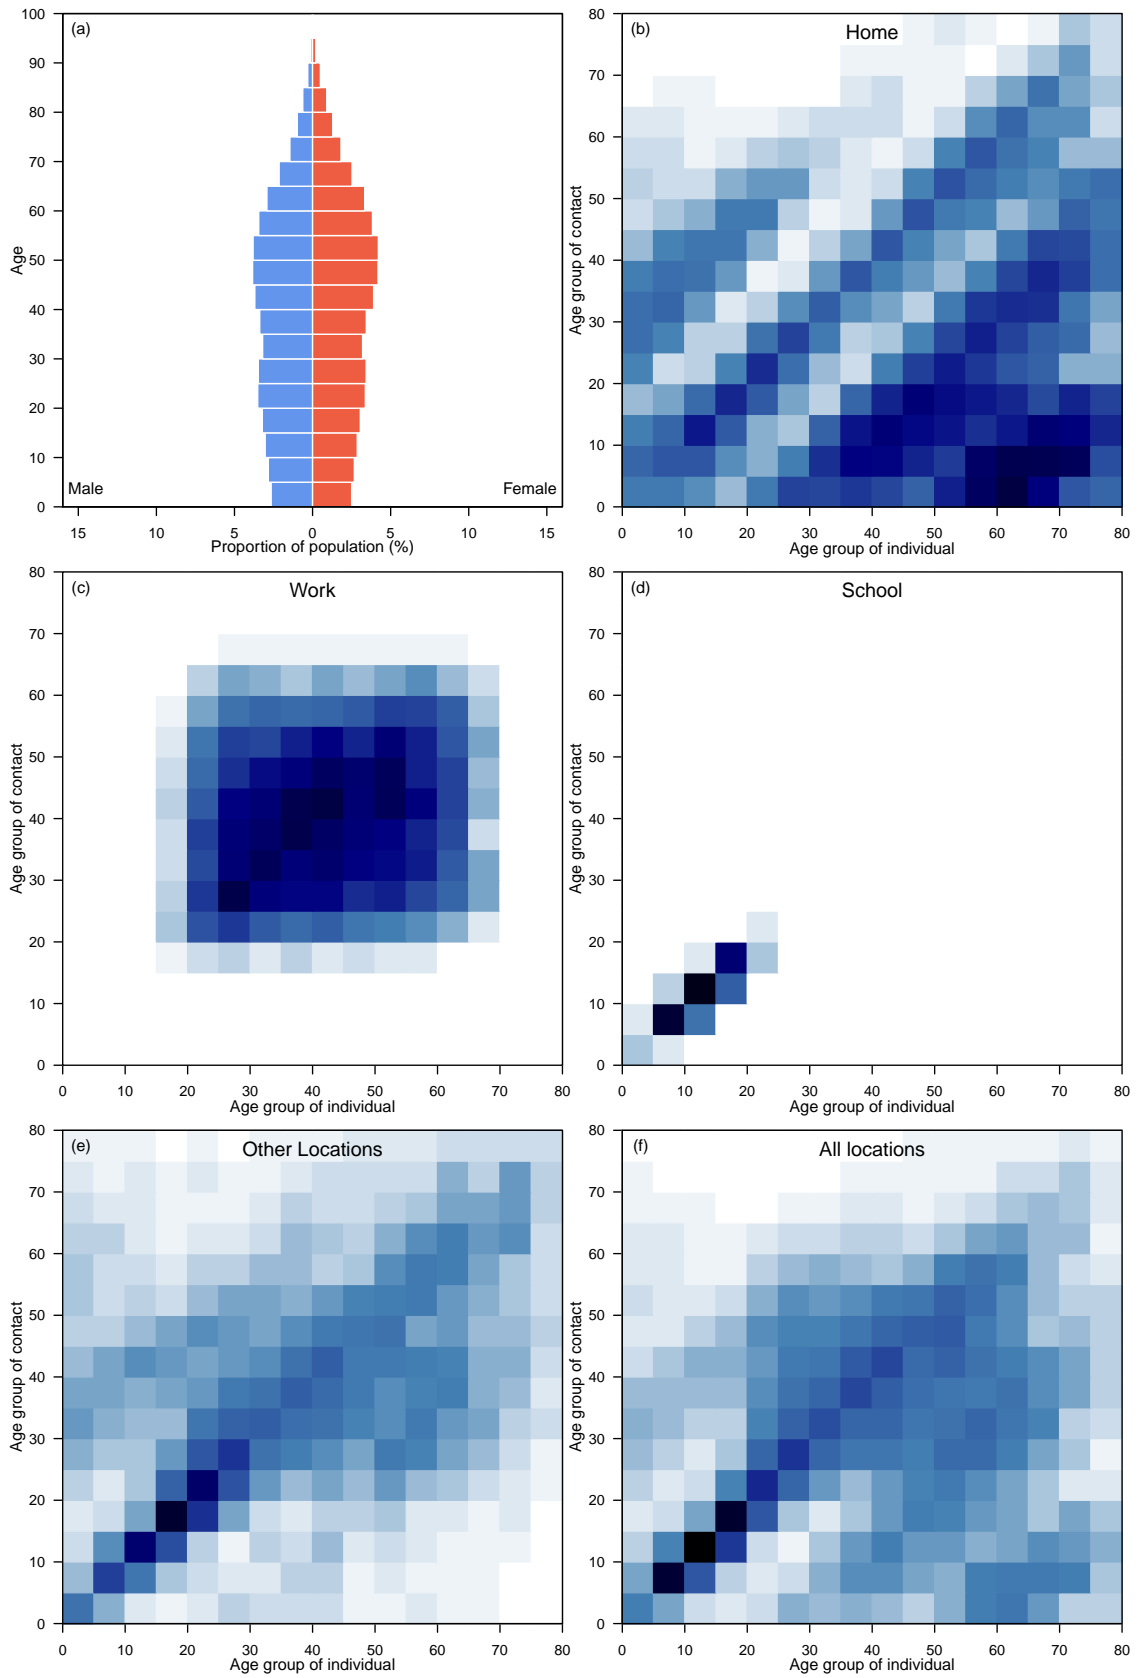

# Timor-Leste

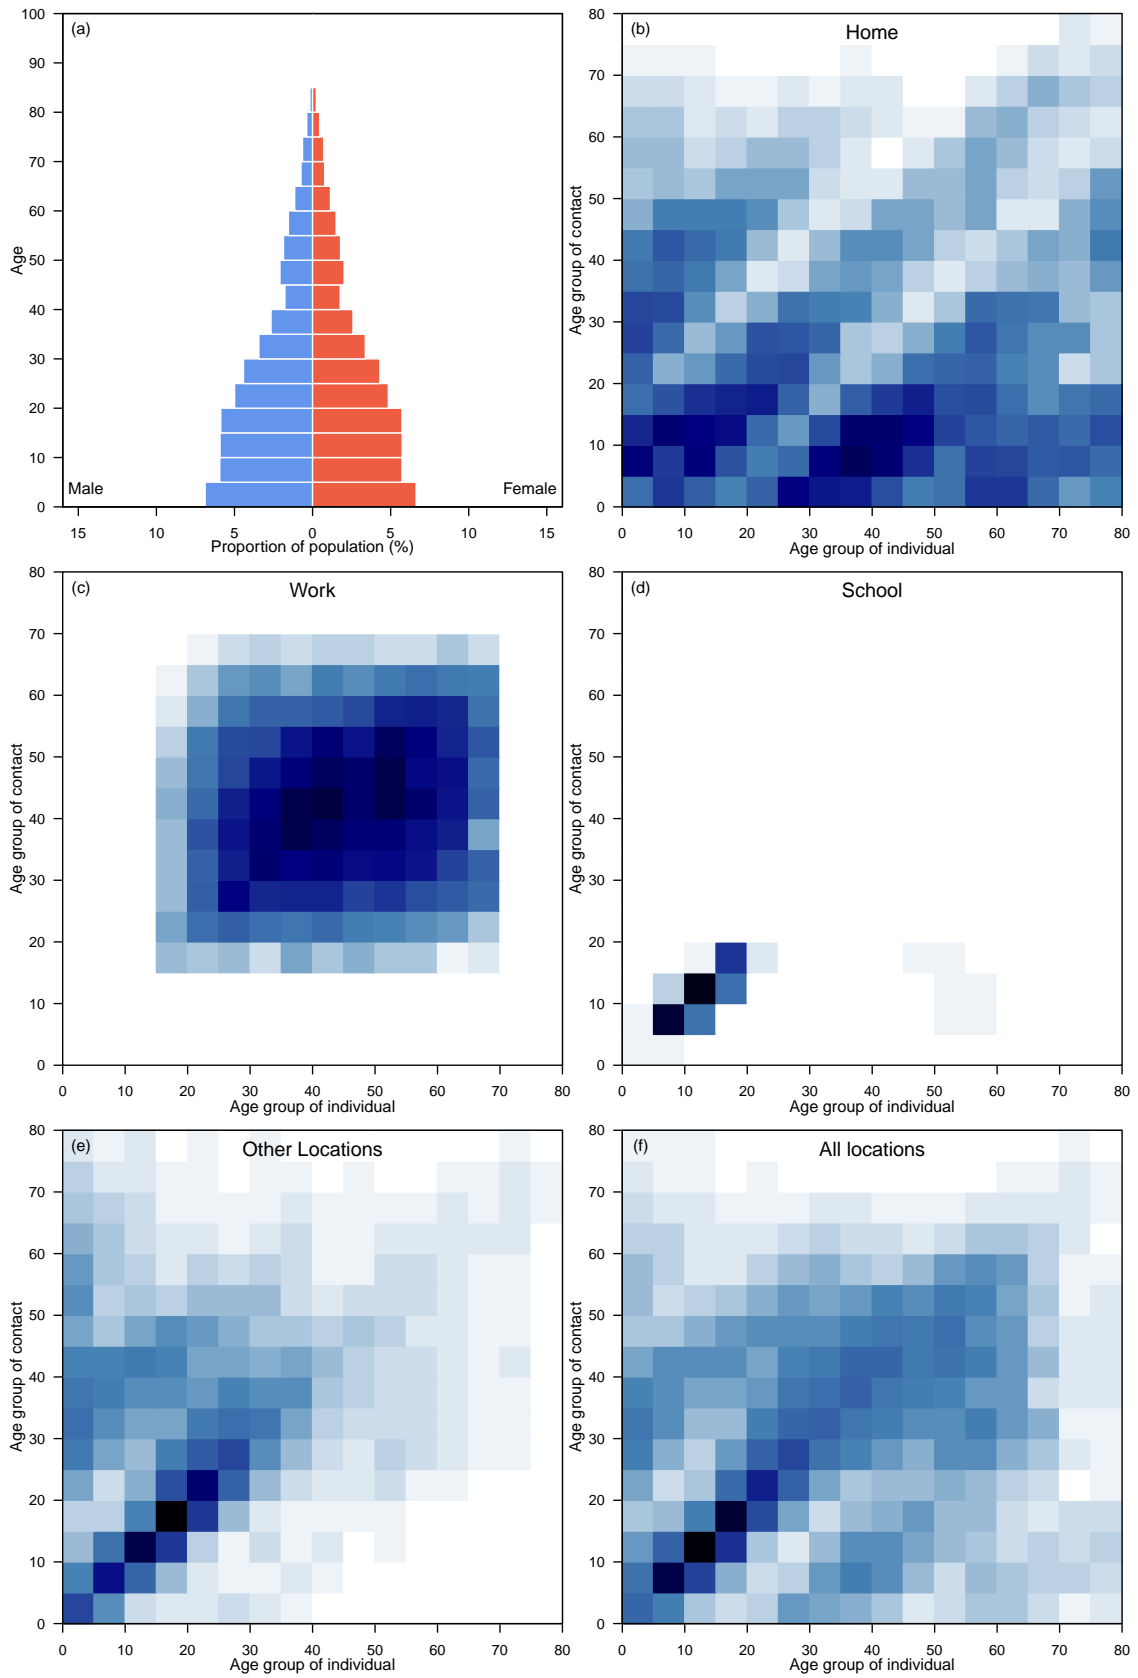

# Togo

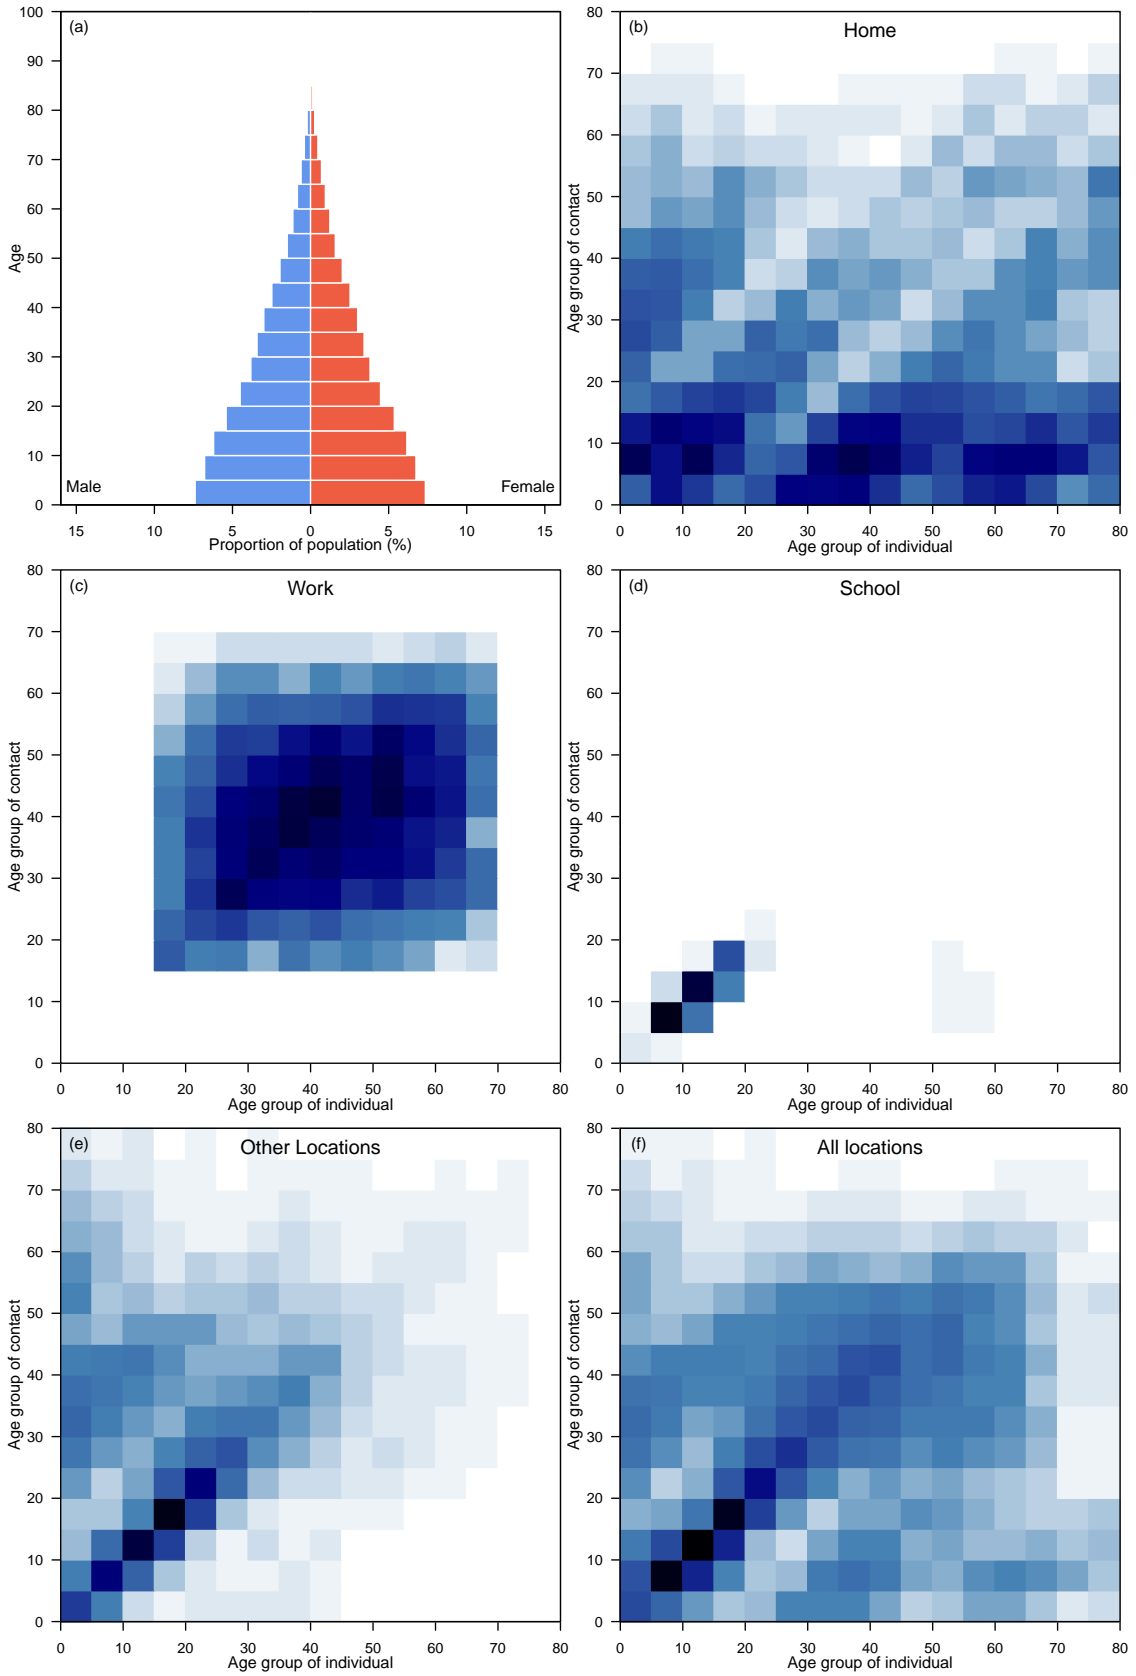

# Tonga

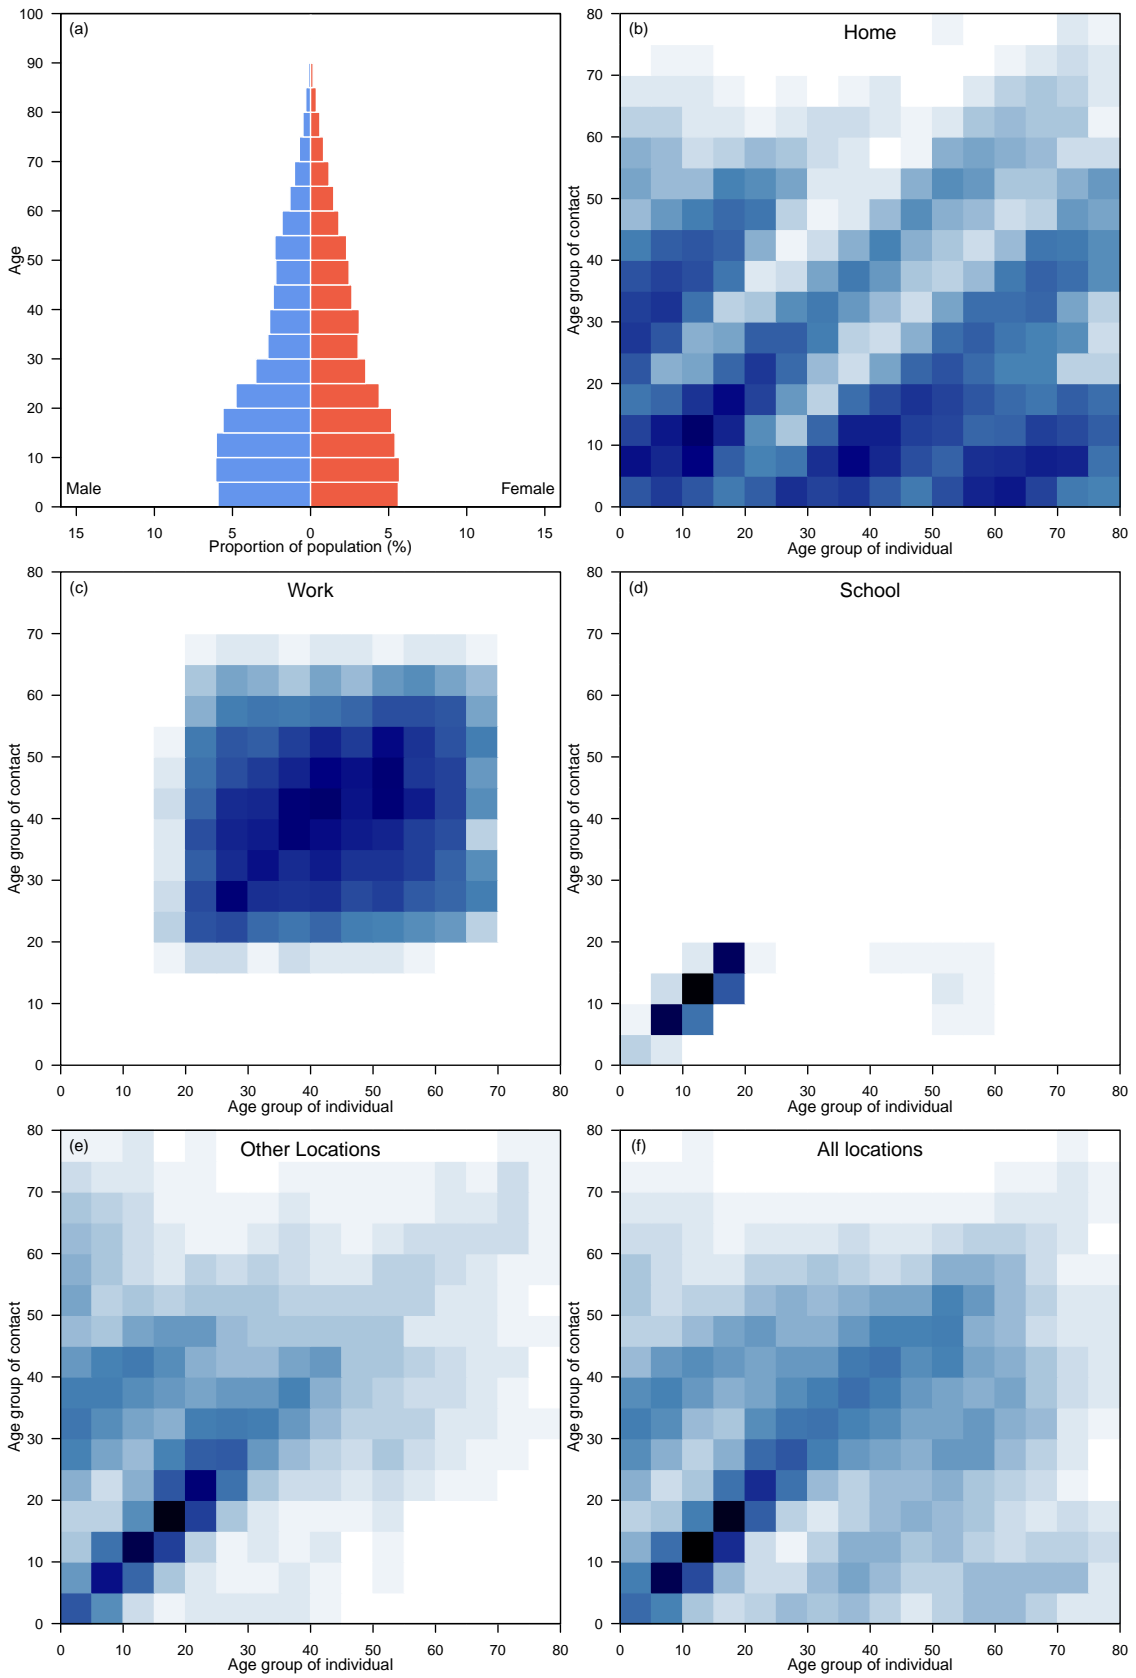

# Trinidad and Tobago

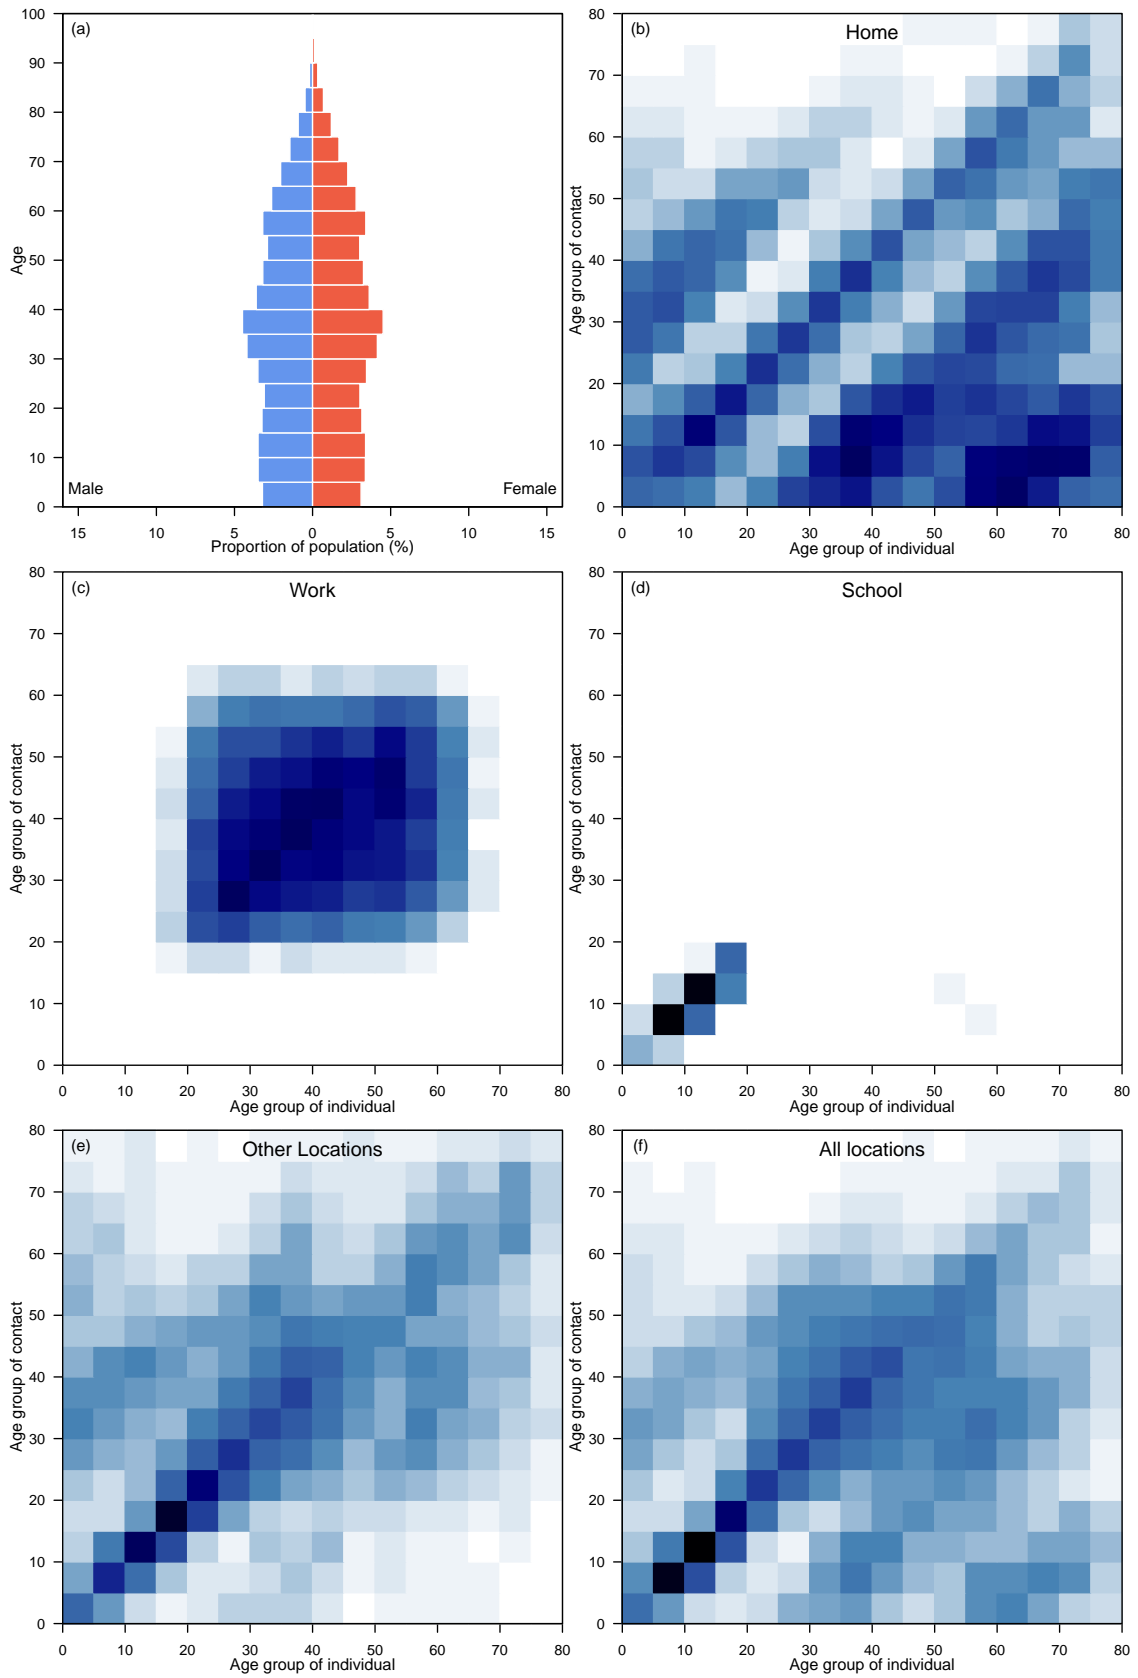

# Tunisia

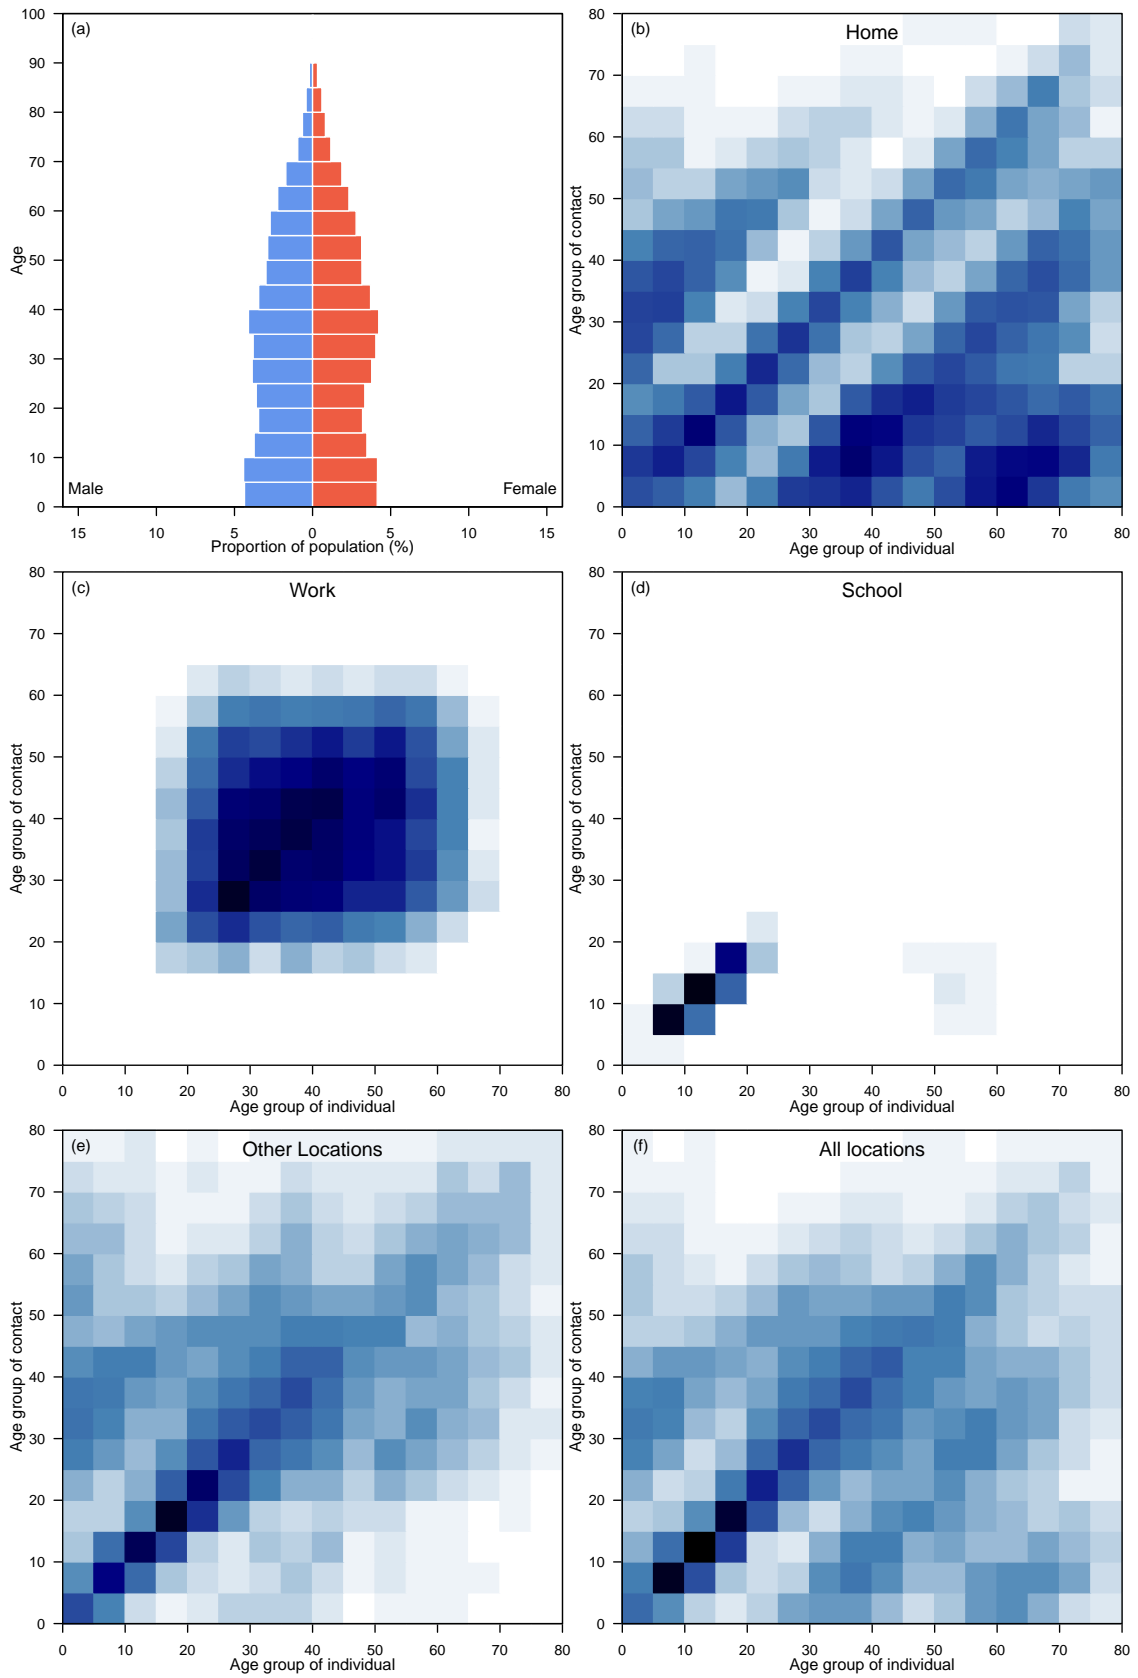



# Turkey

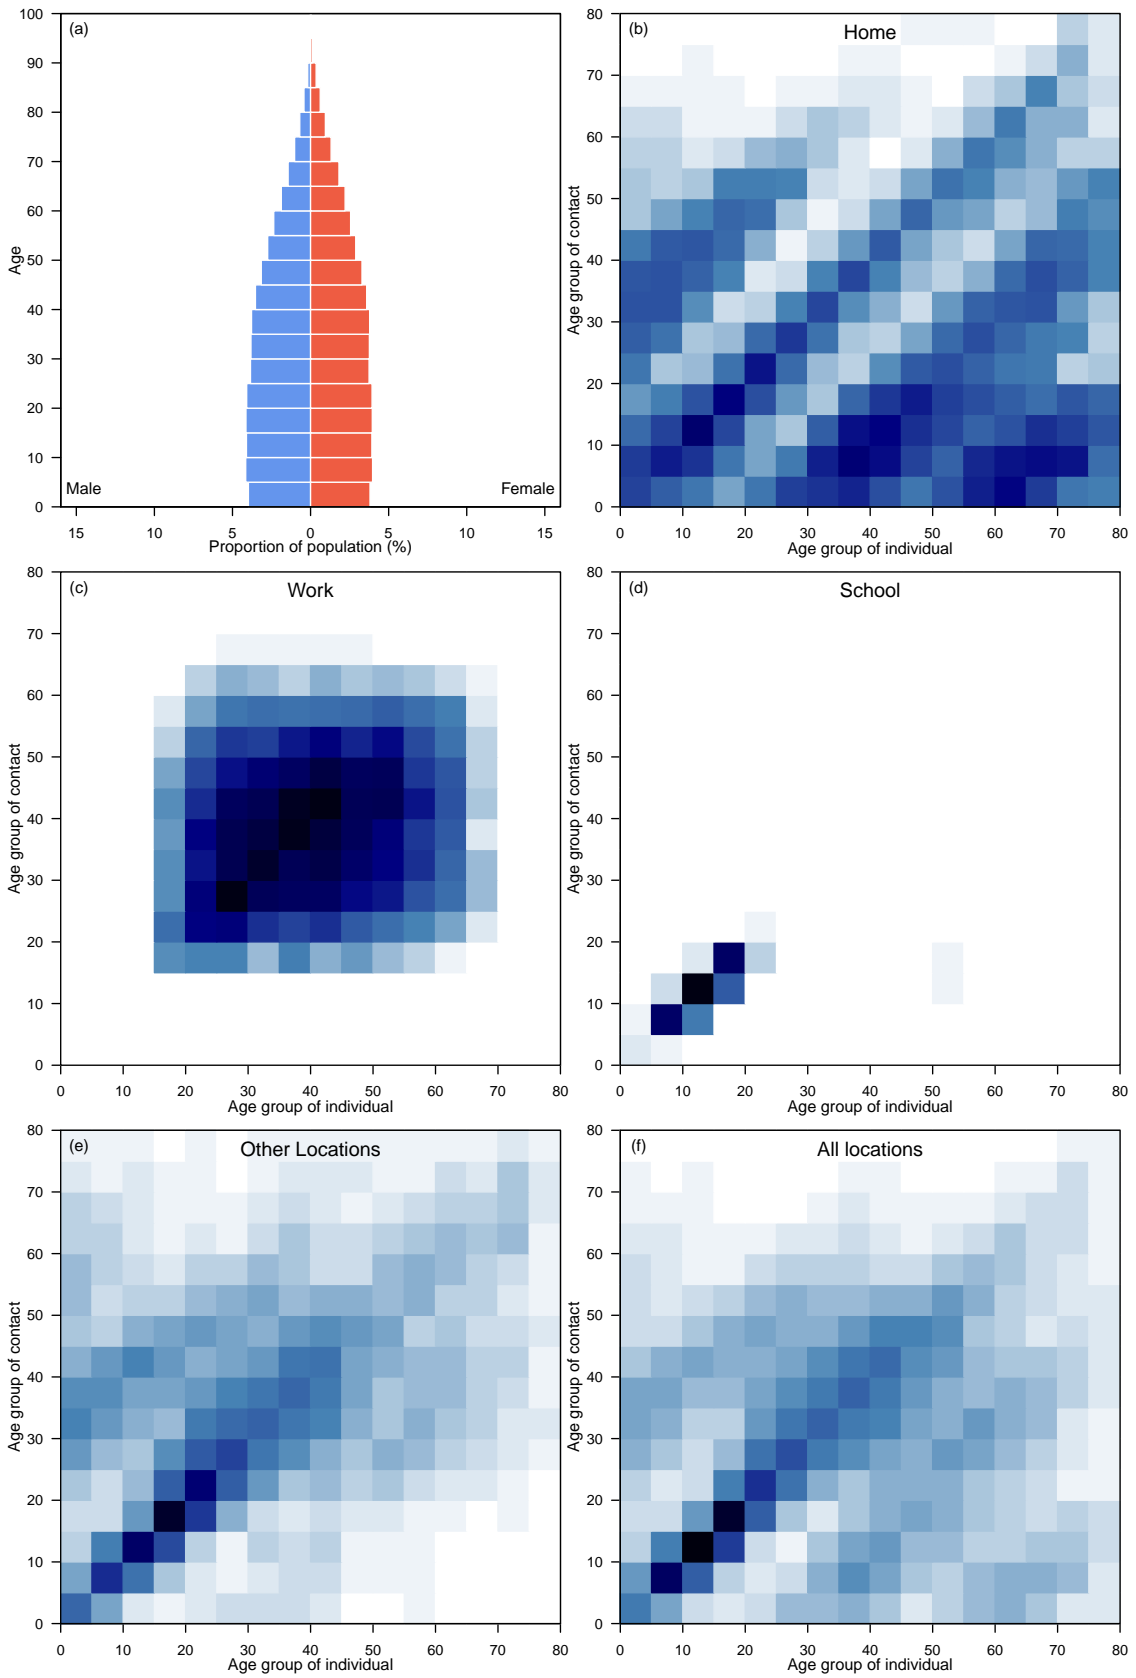

# Turkmenistan

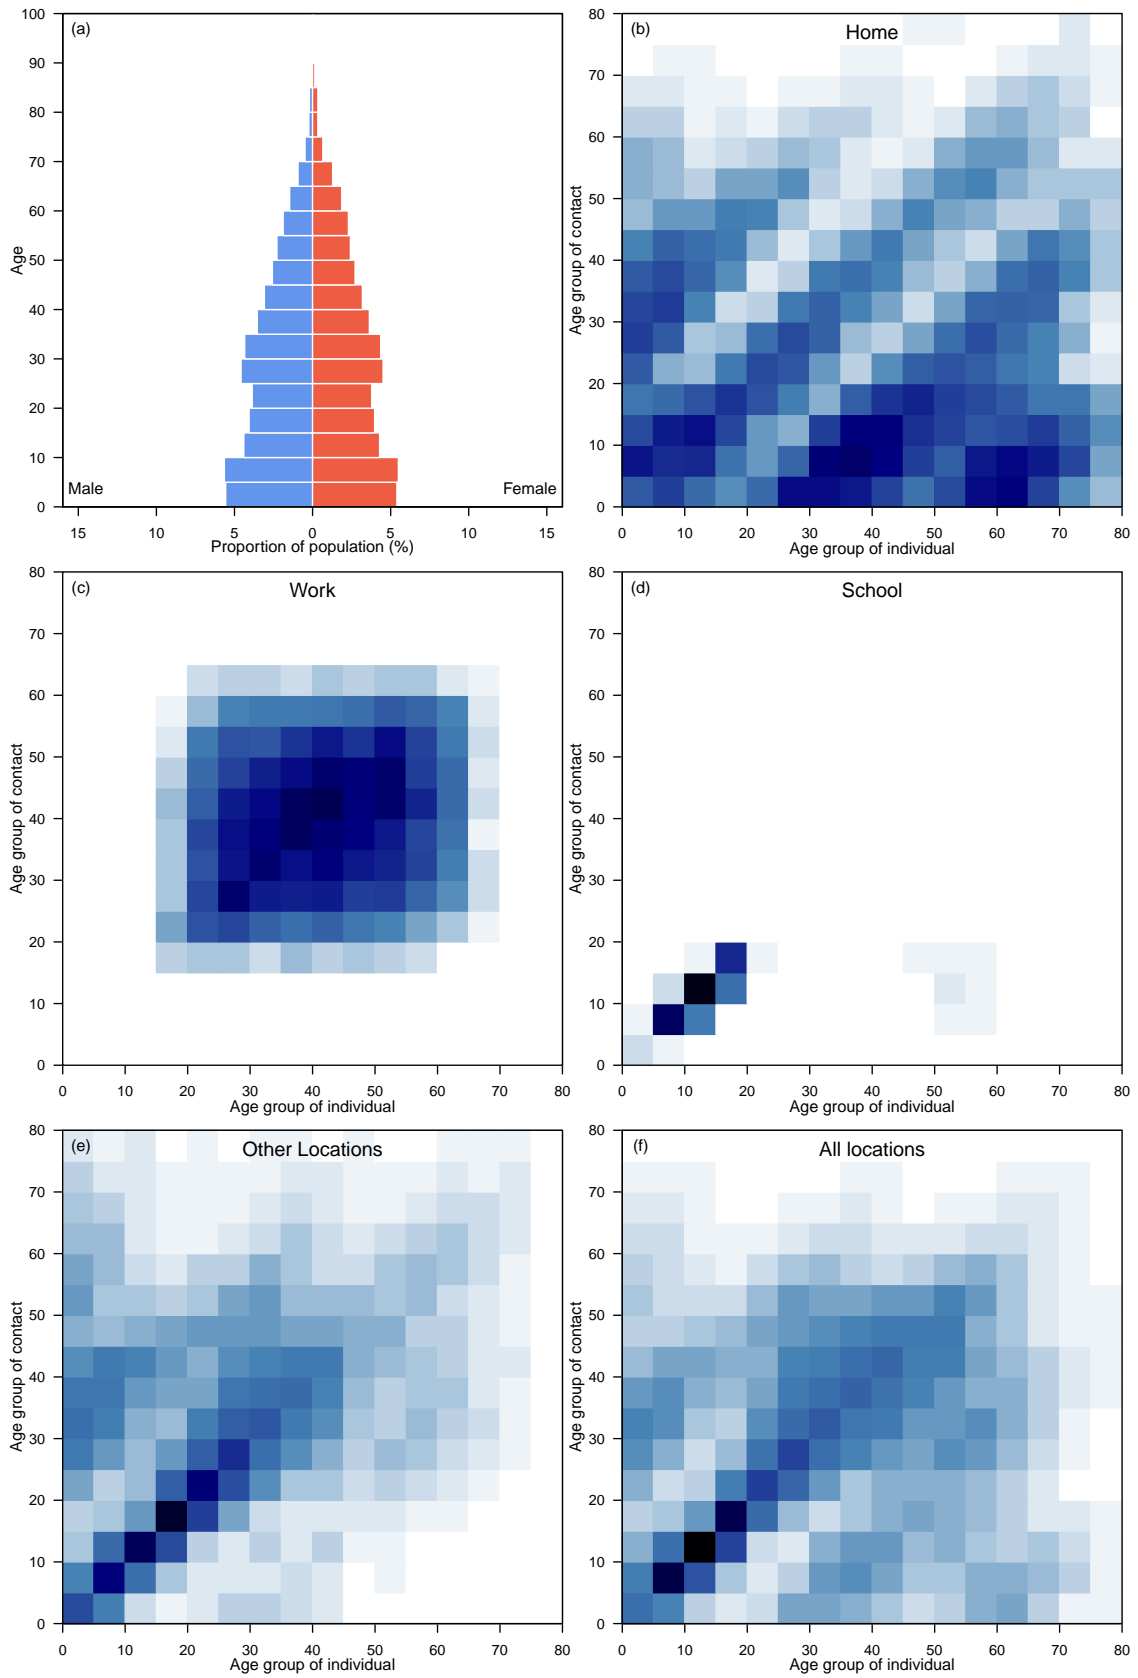

# Uganda

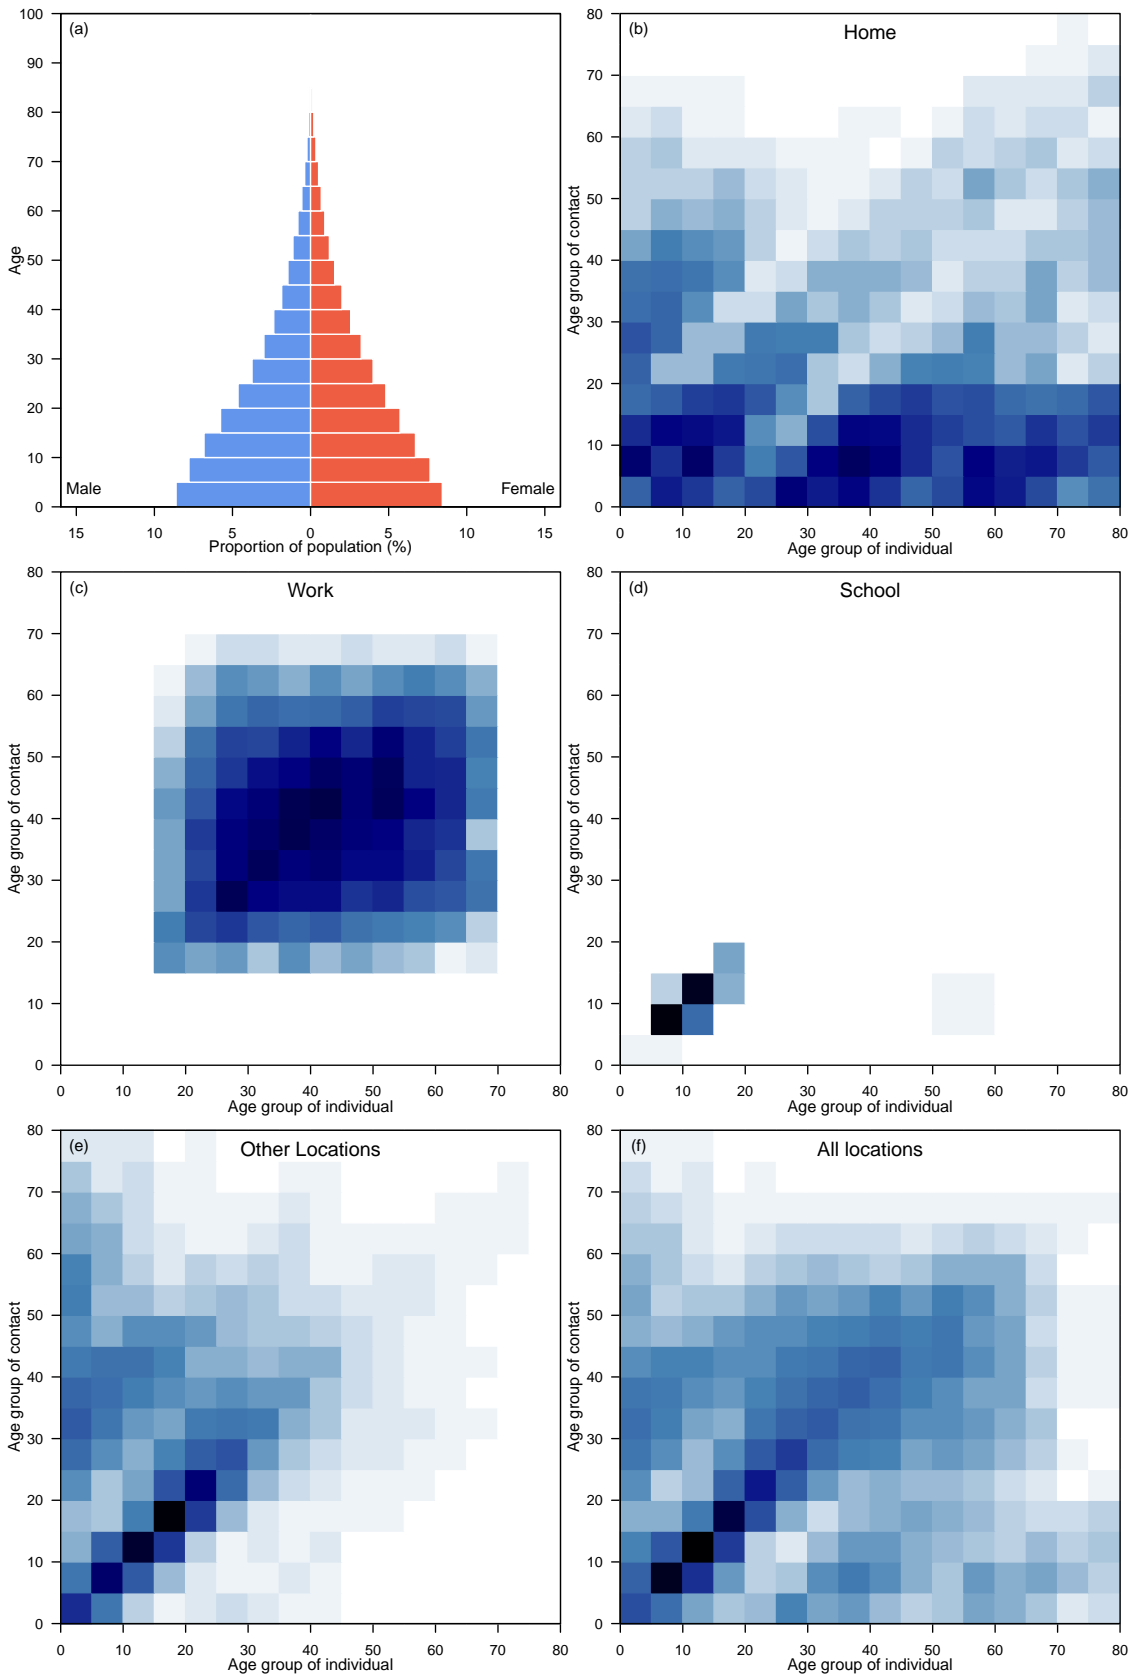

# Ukraine

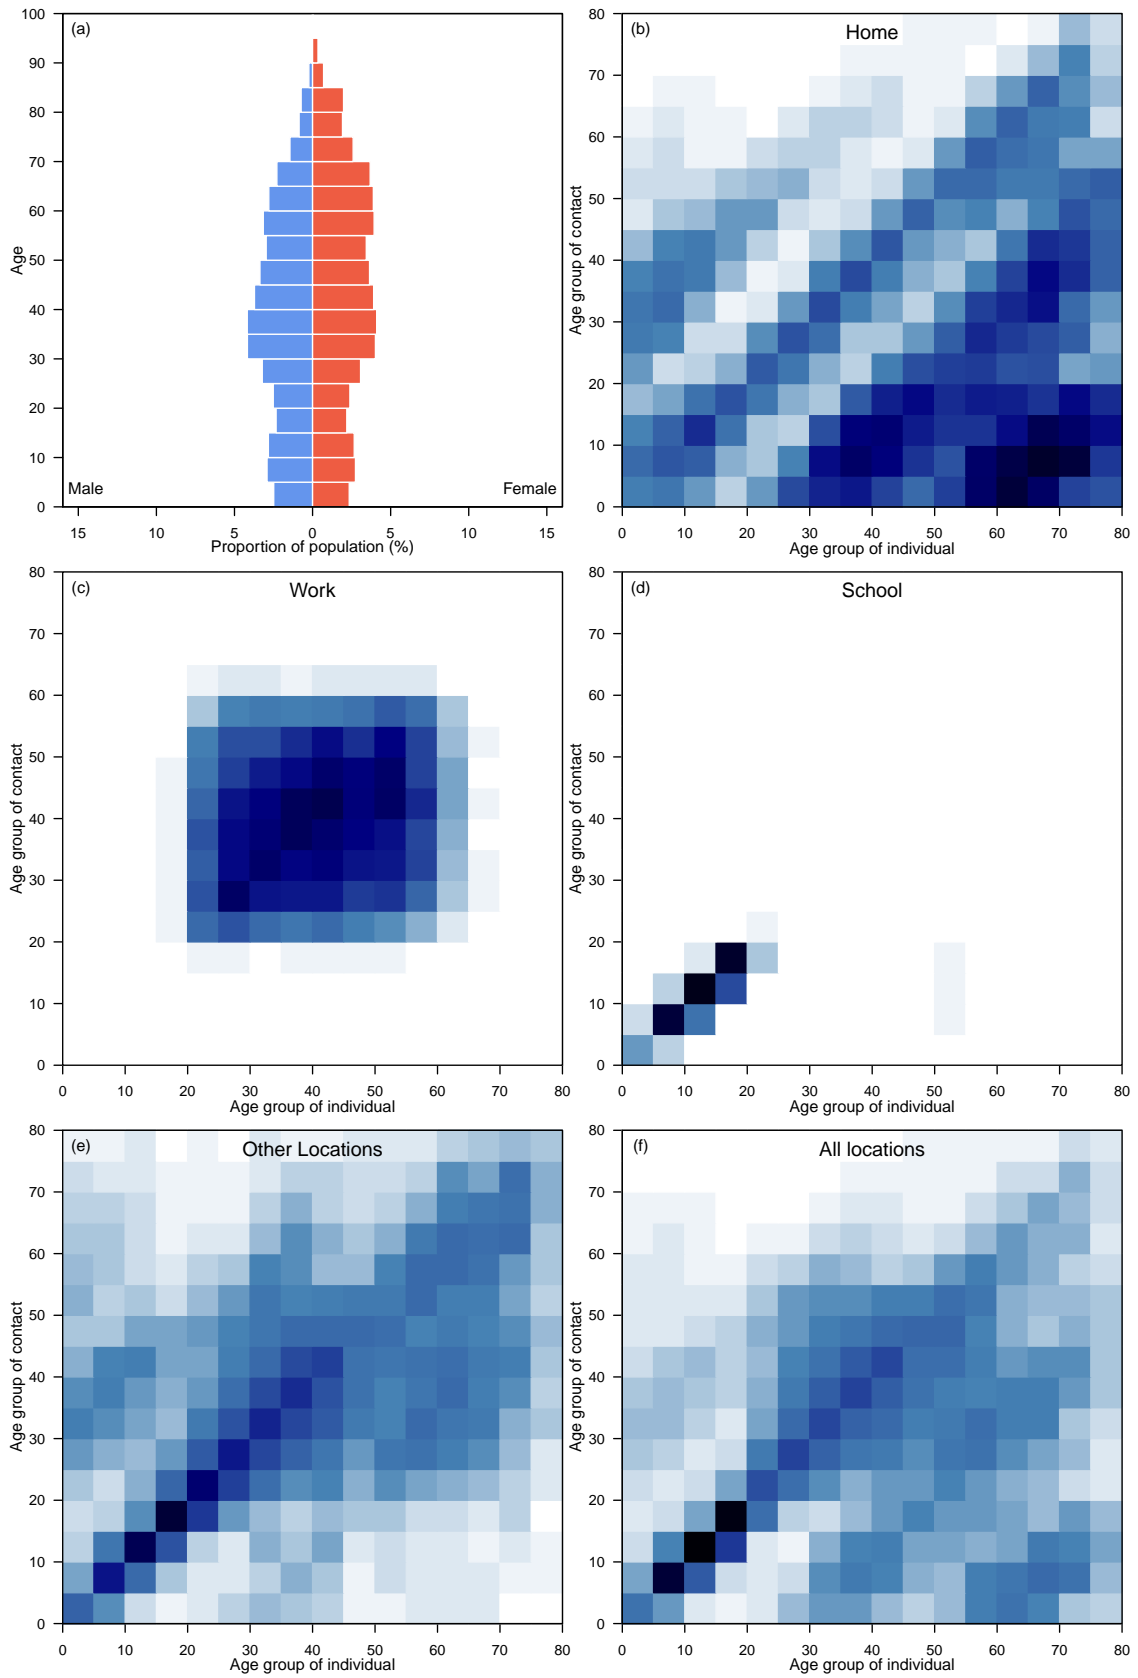

# United Arab Emirates

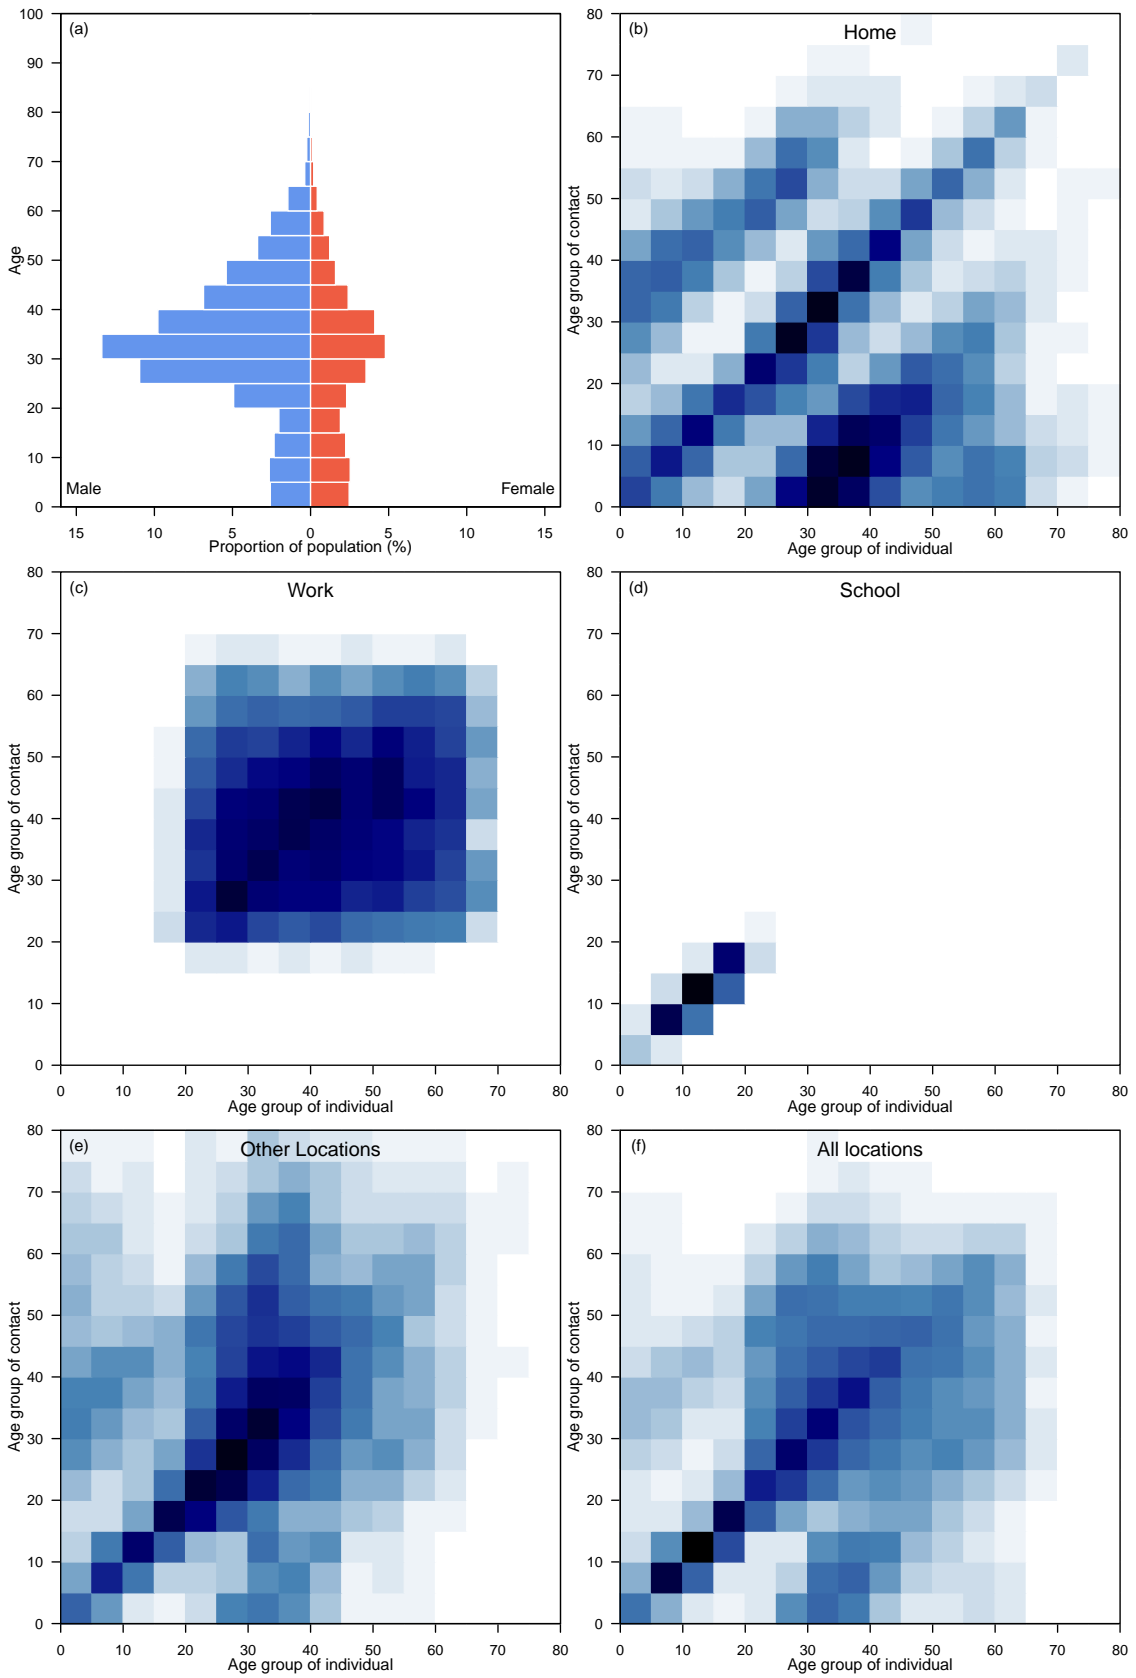

# United Kingdom

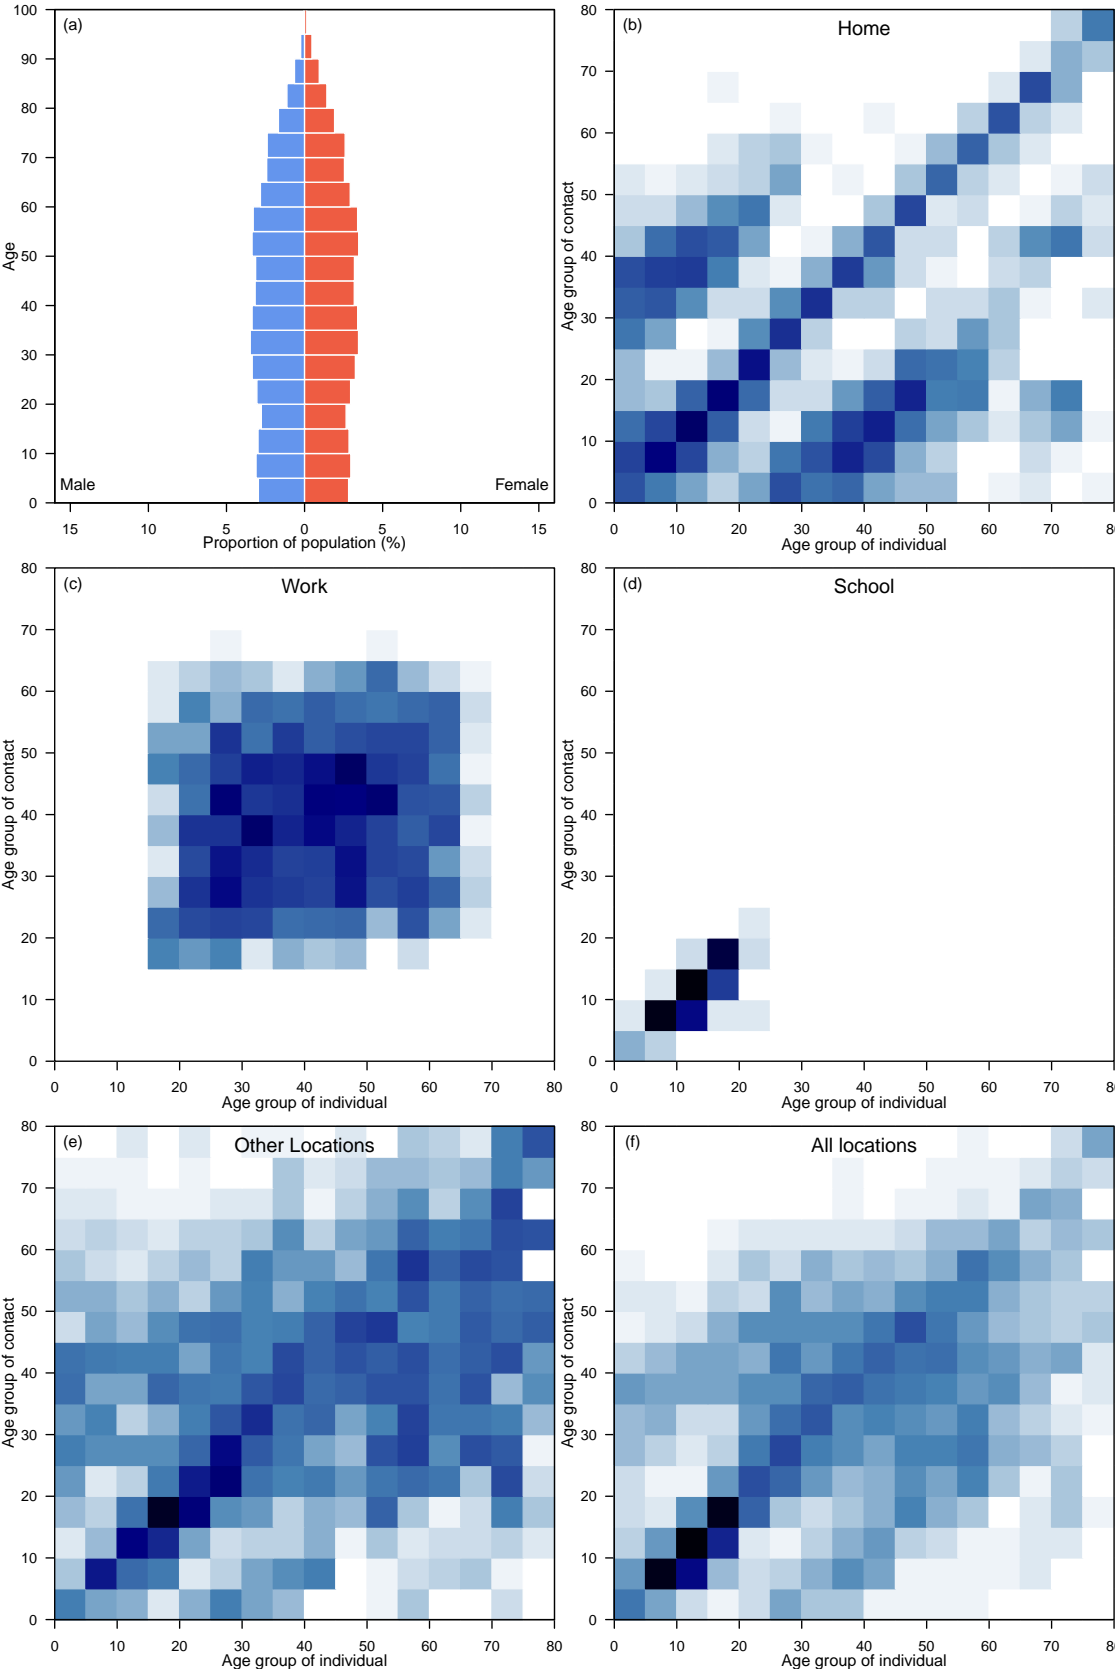

# United Republic of Tanzania

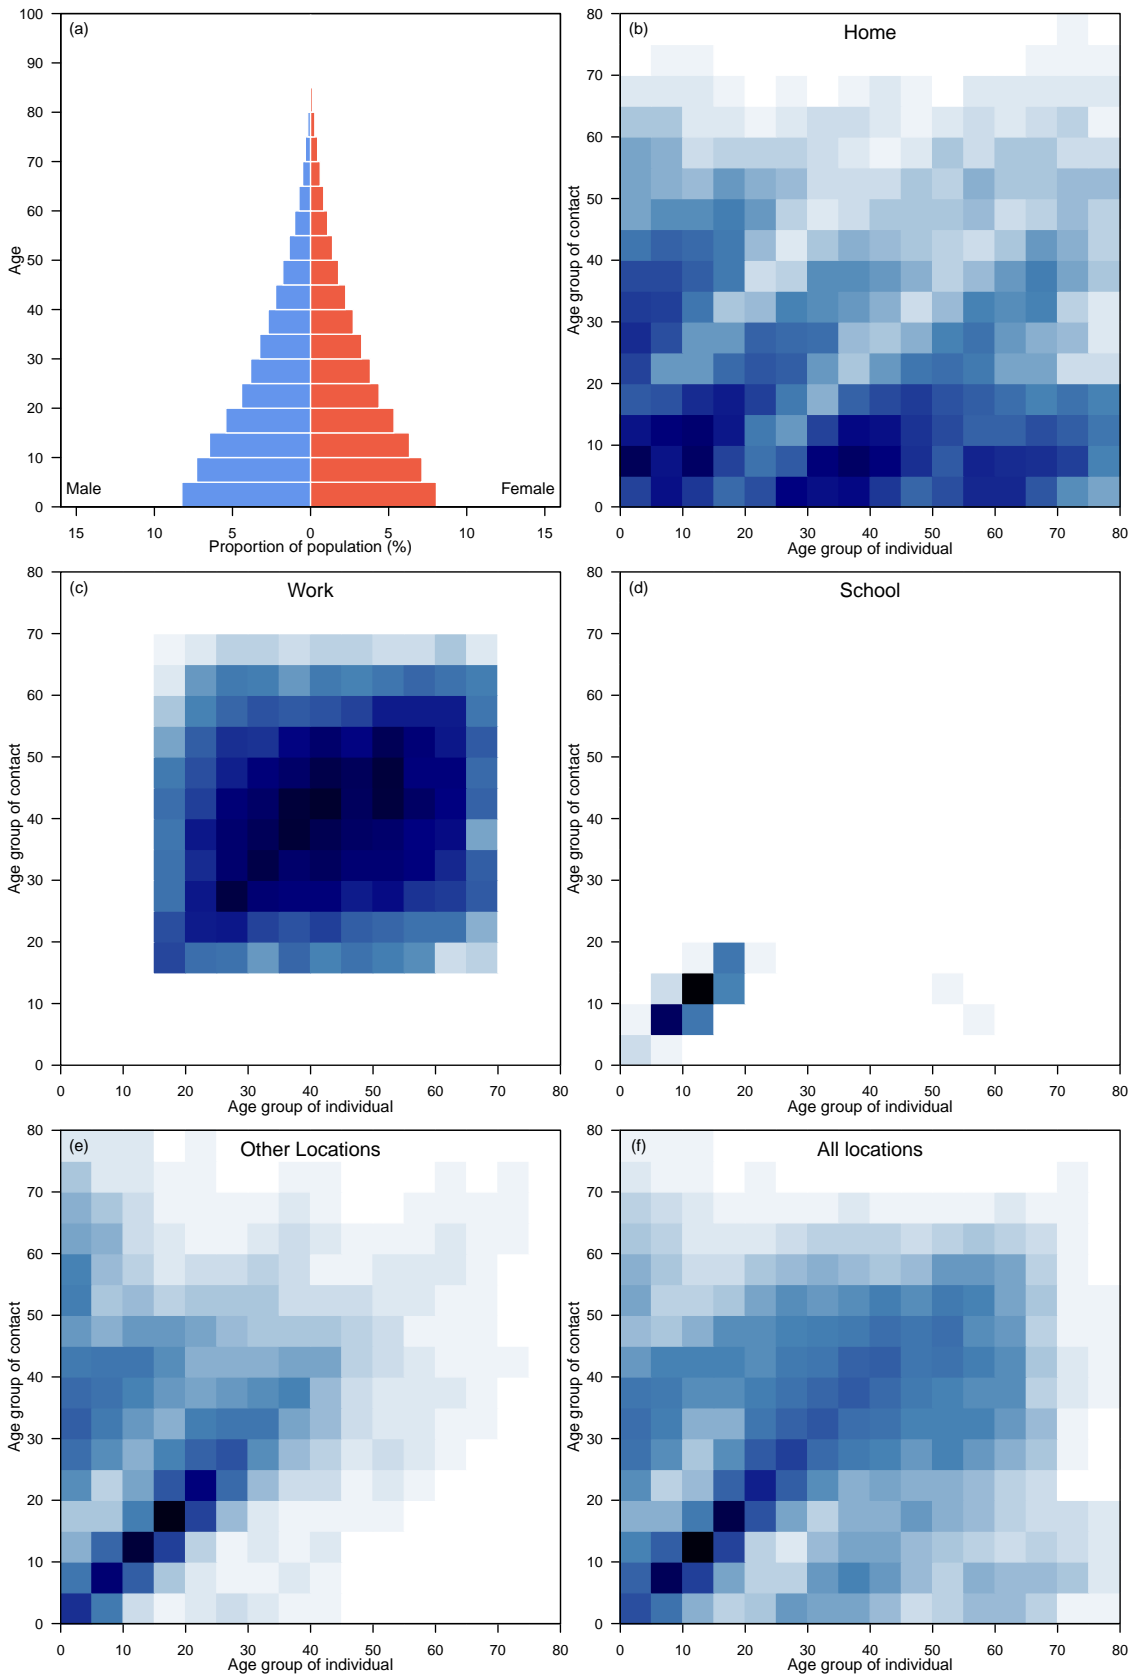

# United States of America

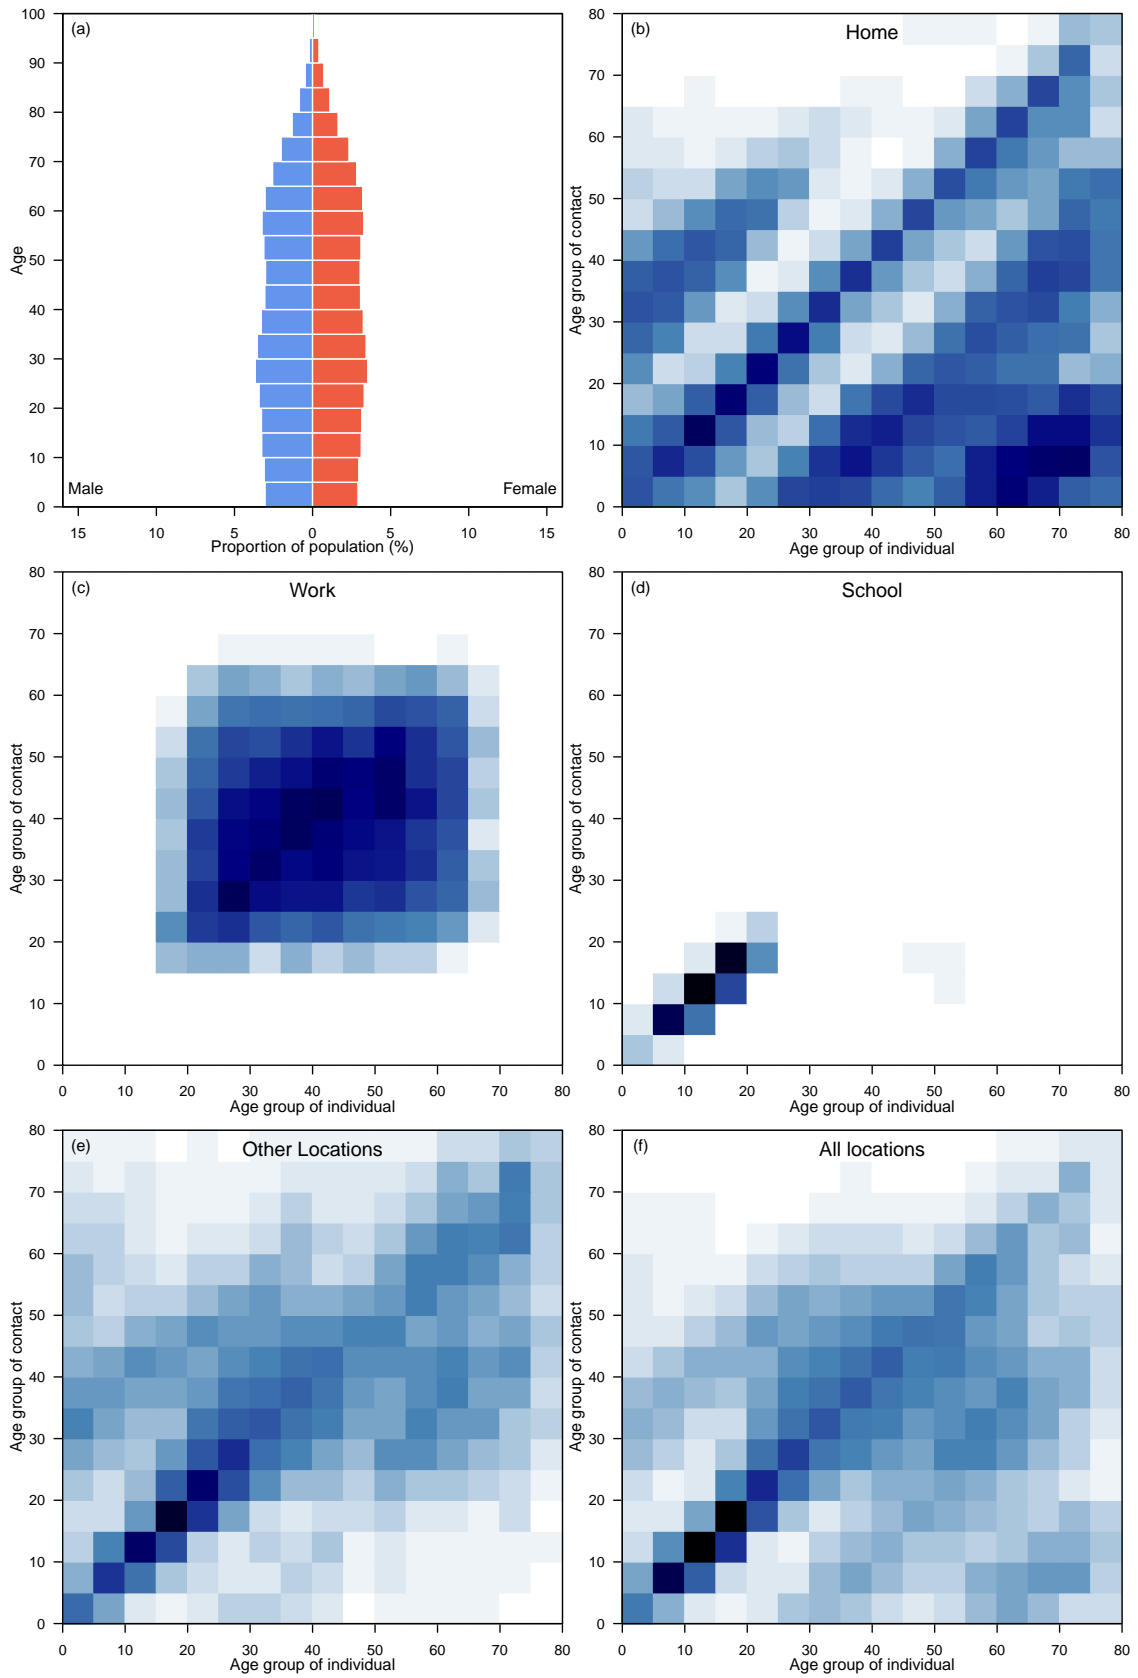



# Uruguay

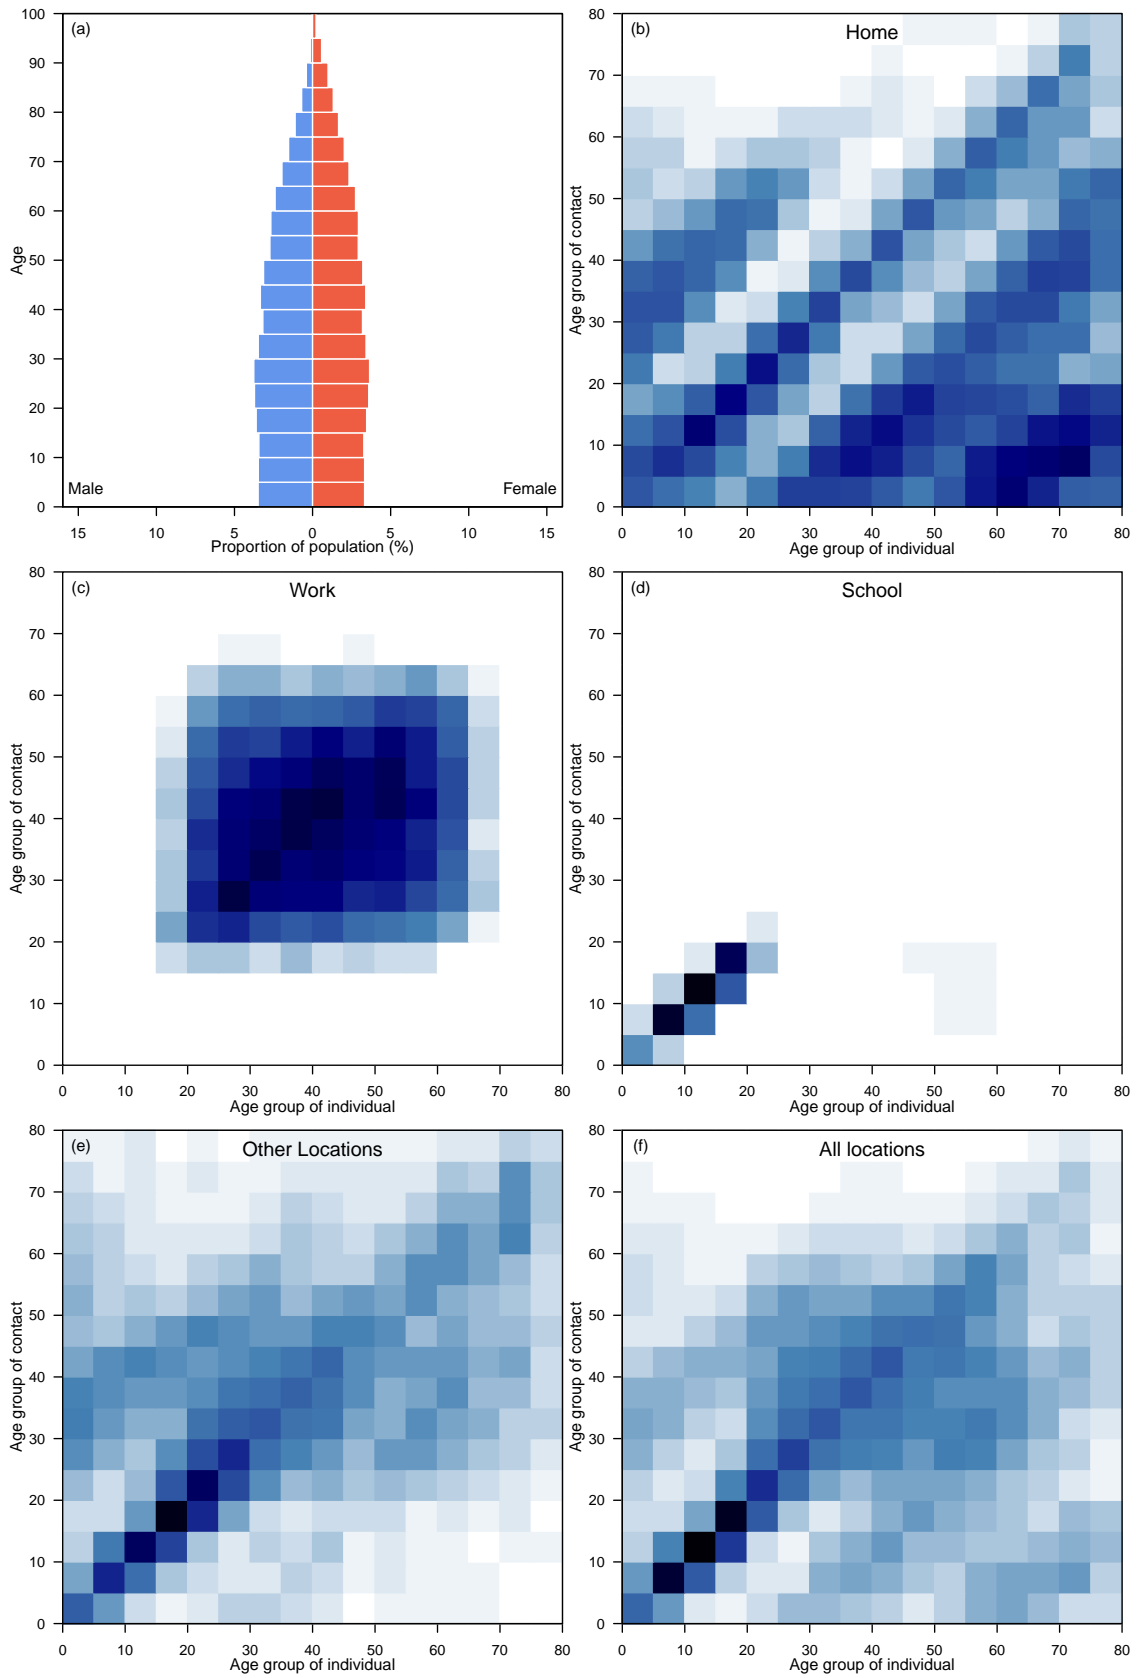

# Uzbekistan

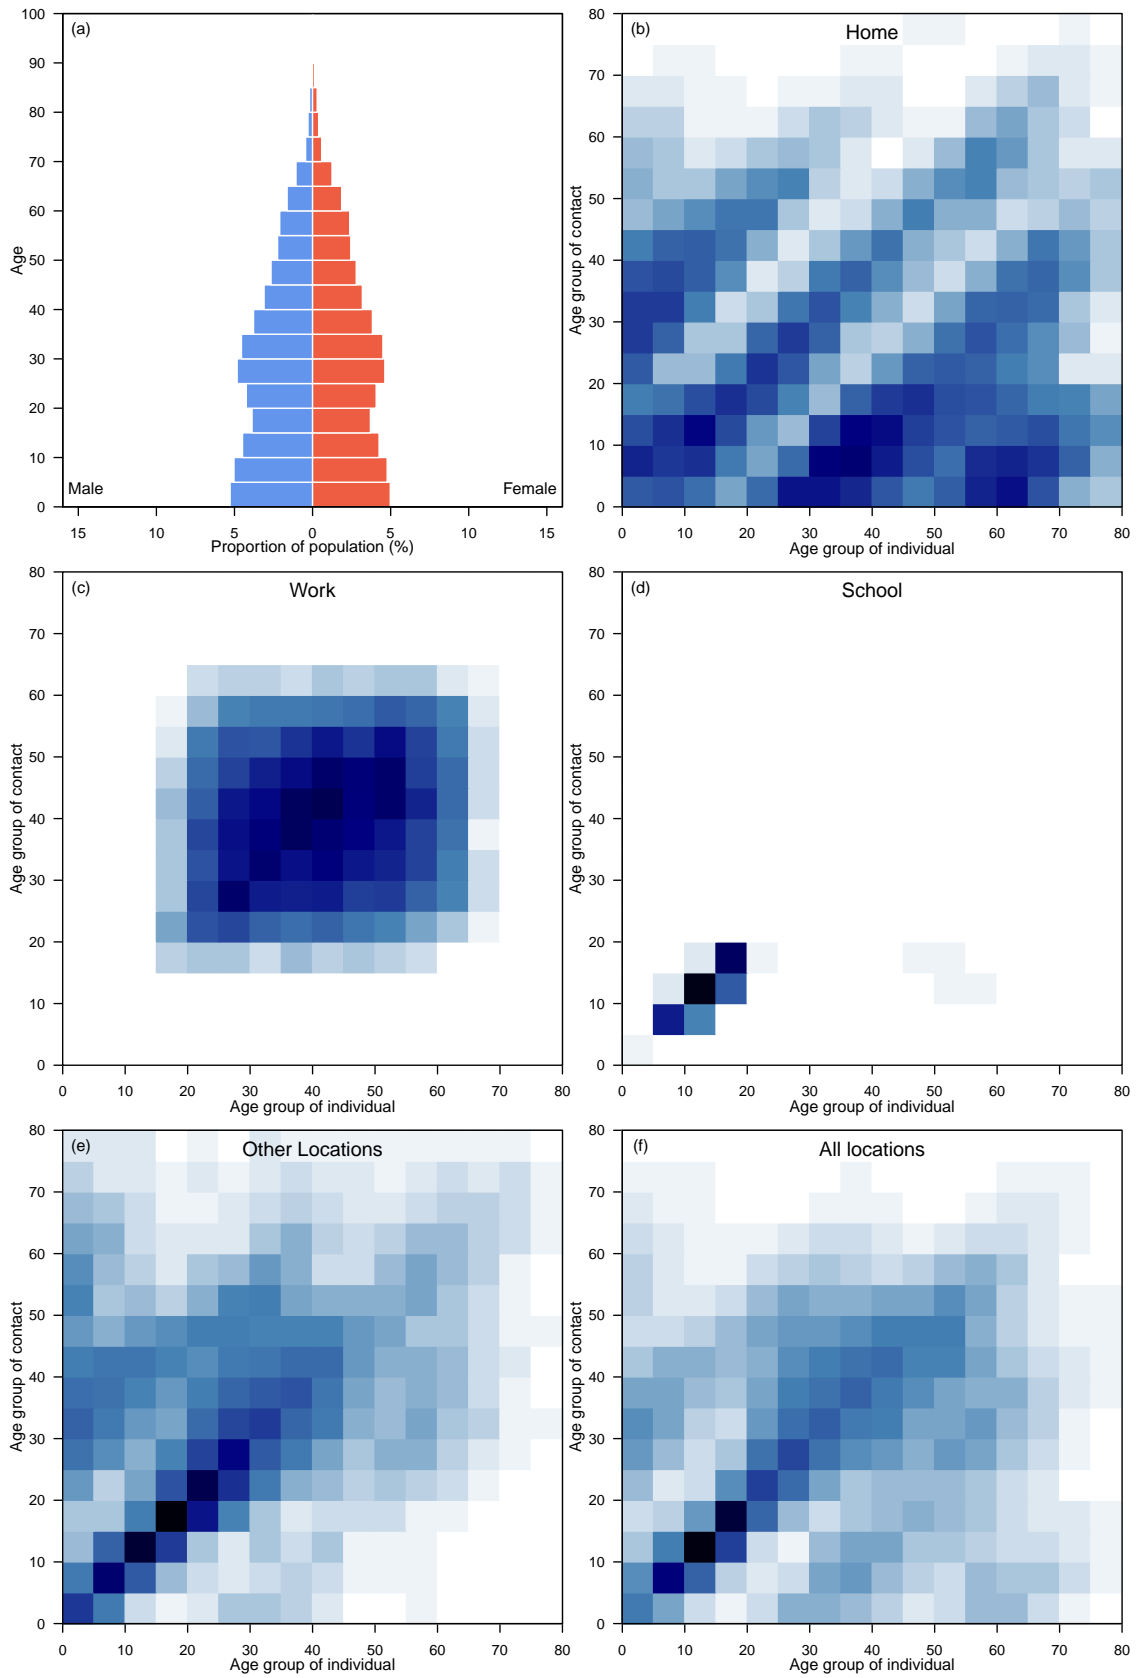

# Vanuatu

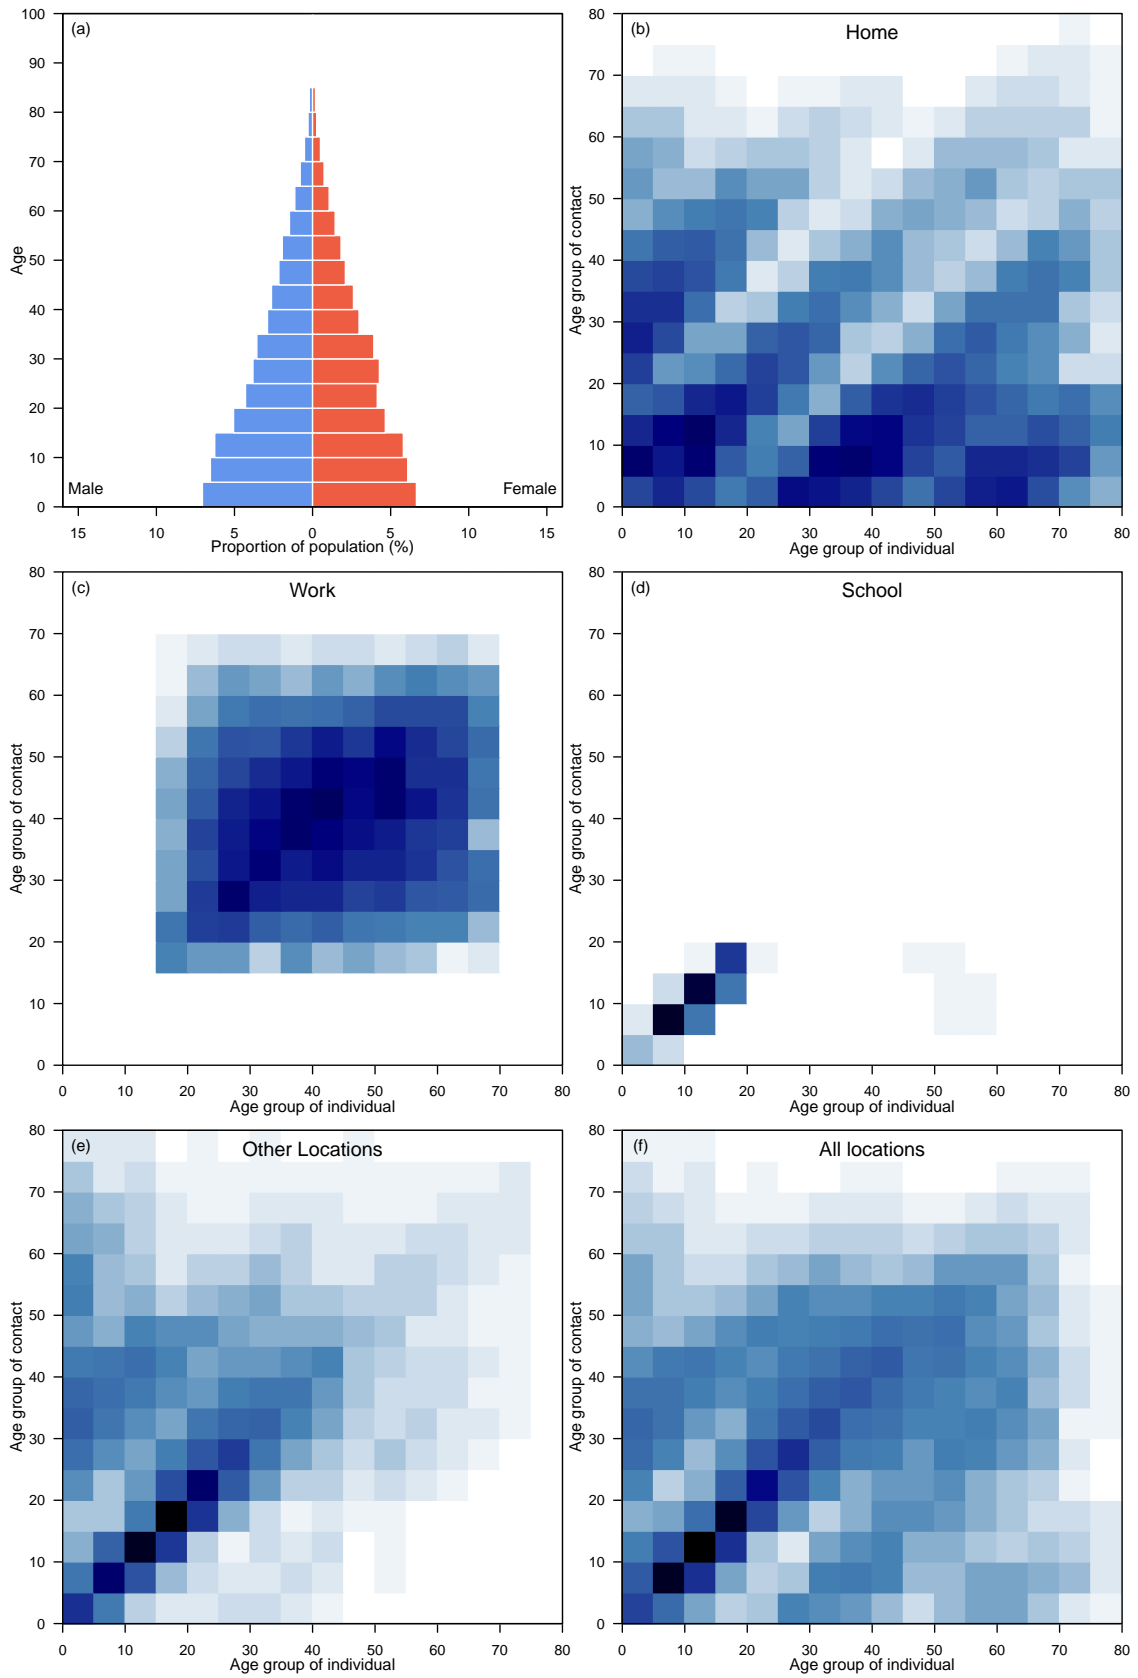

# Venezuela (Bolivarian Republic of)

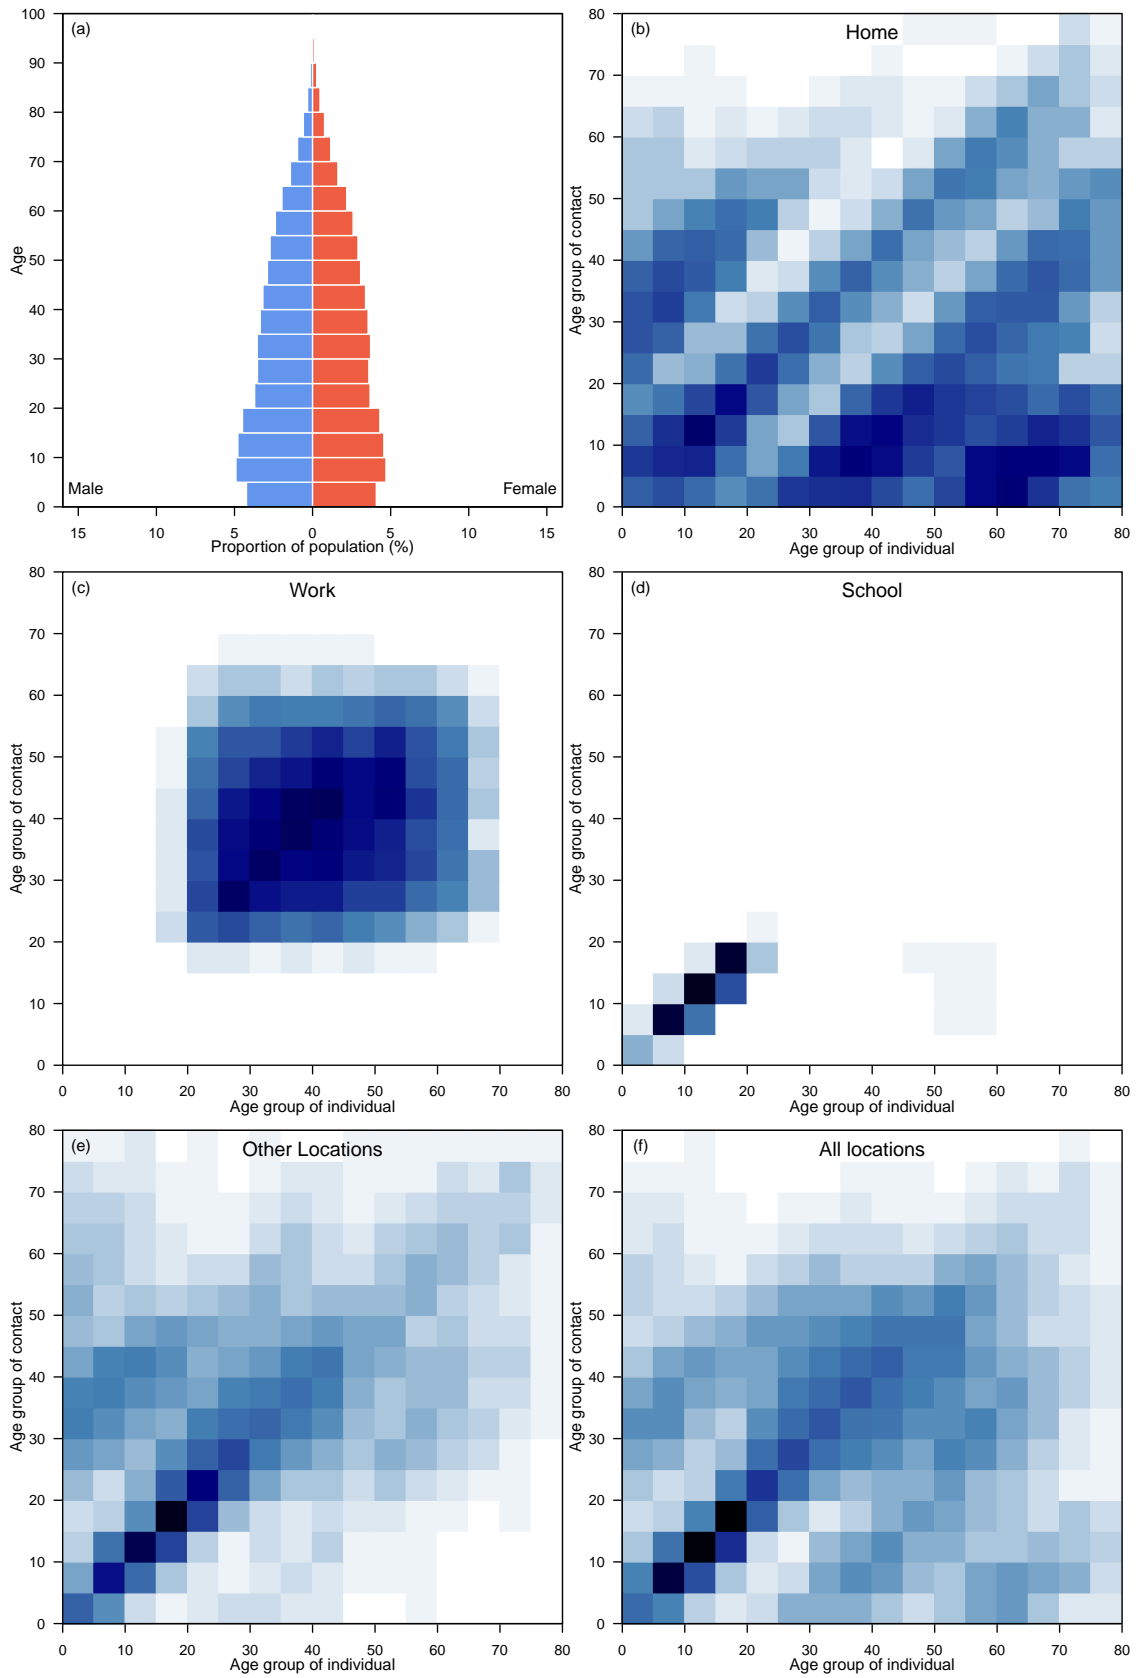

# Viet Nam

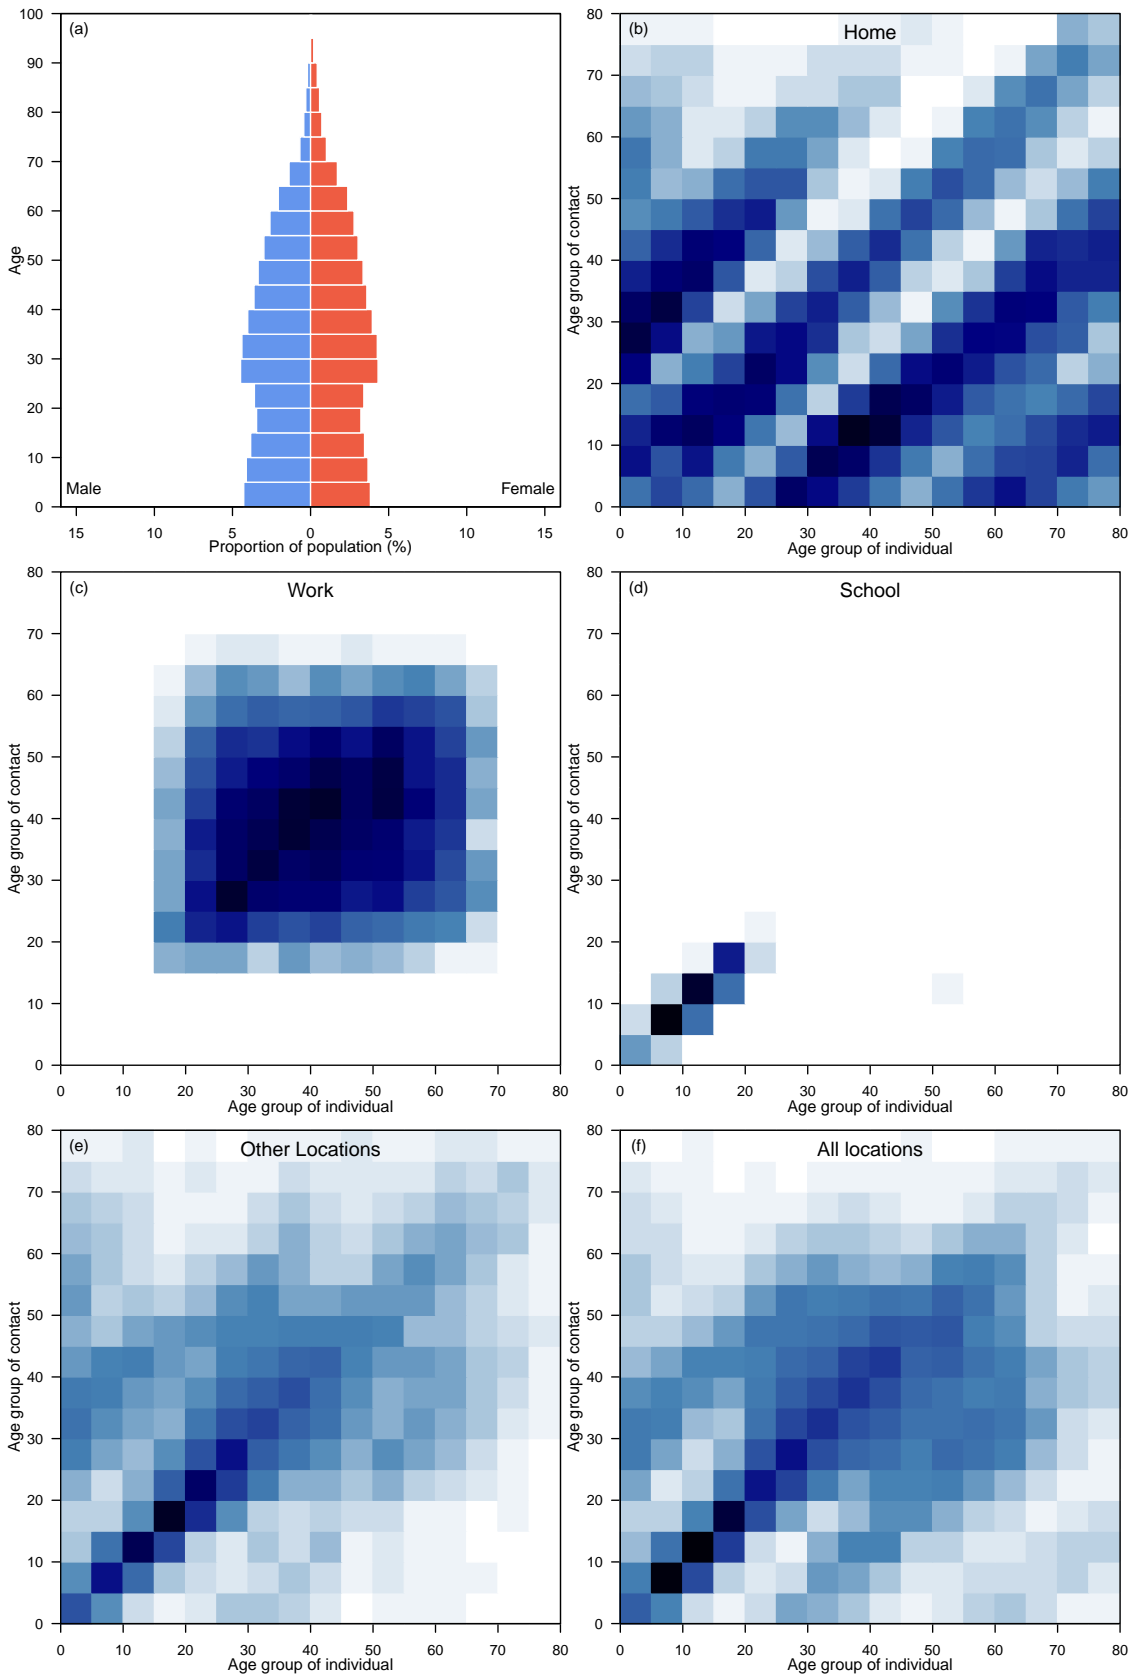

# Yemen

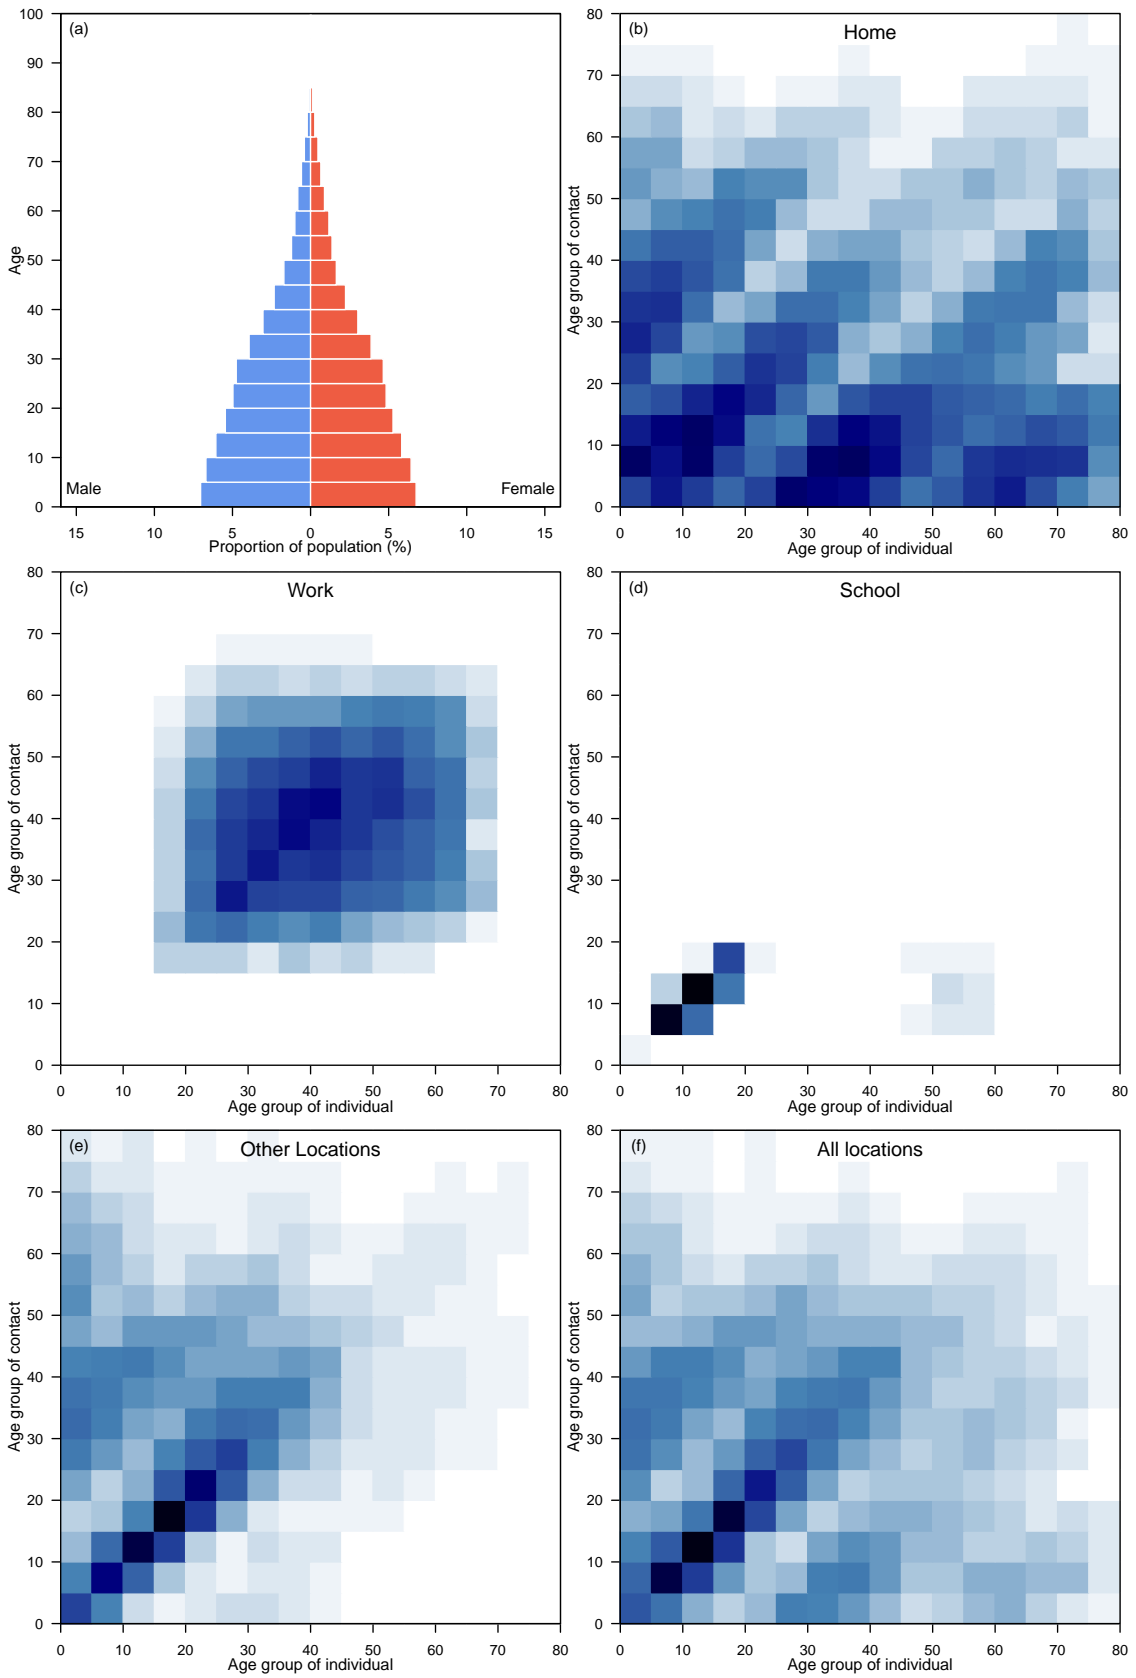

# Zambia

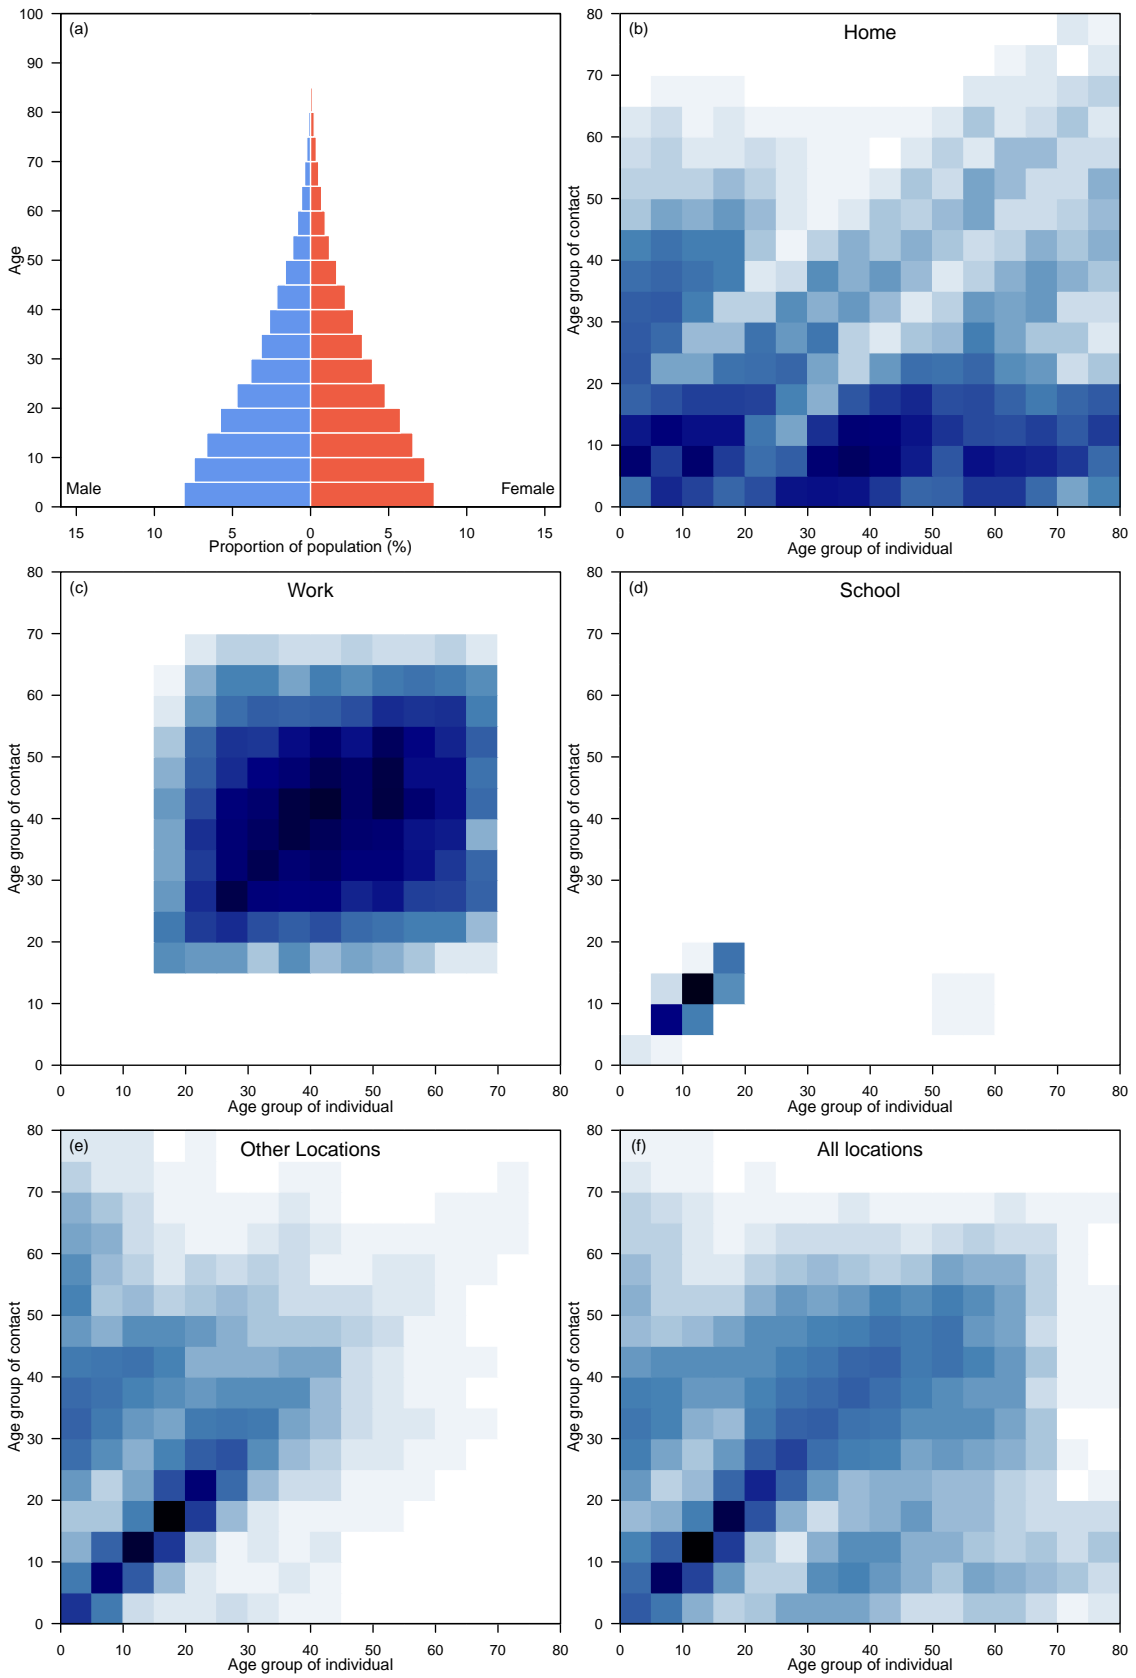

# Zimbabwe

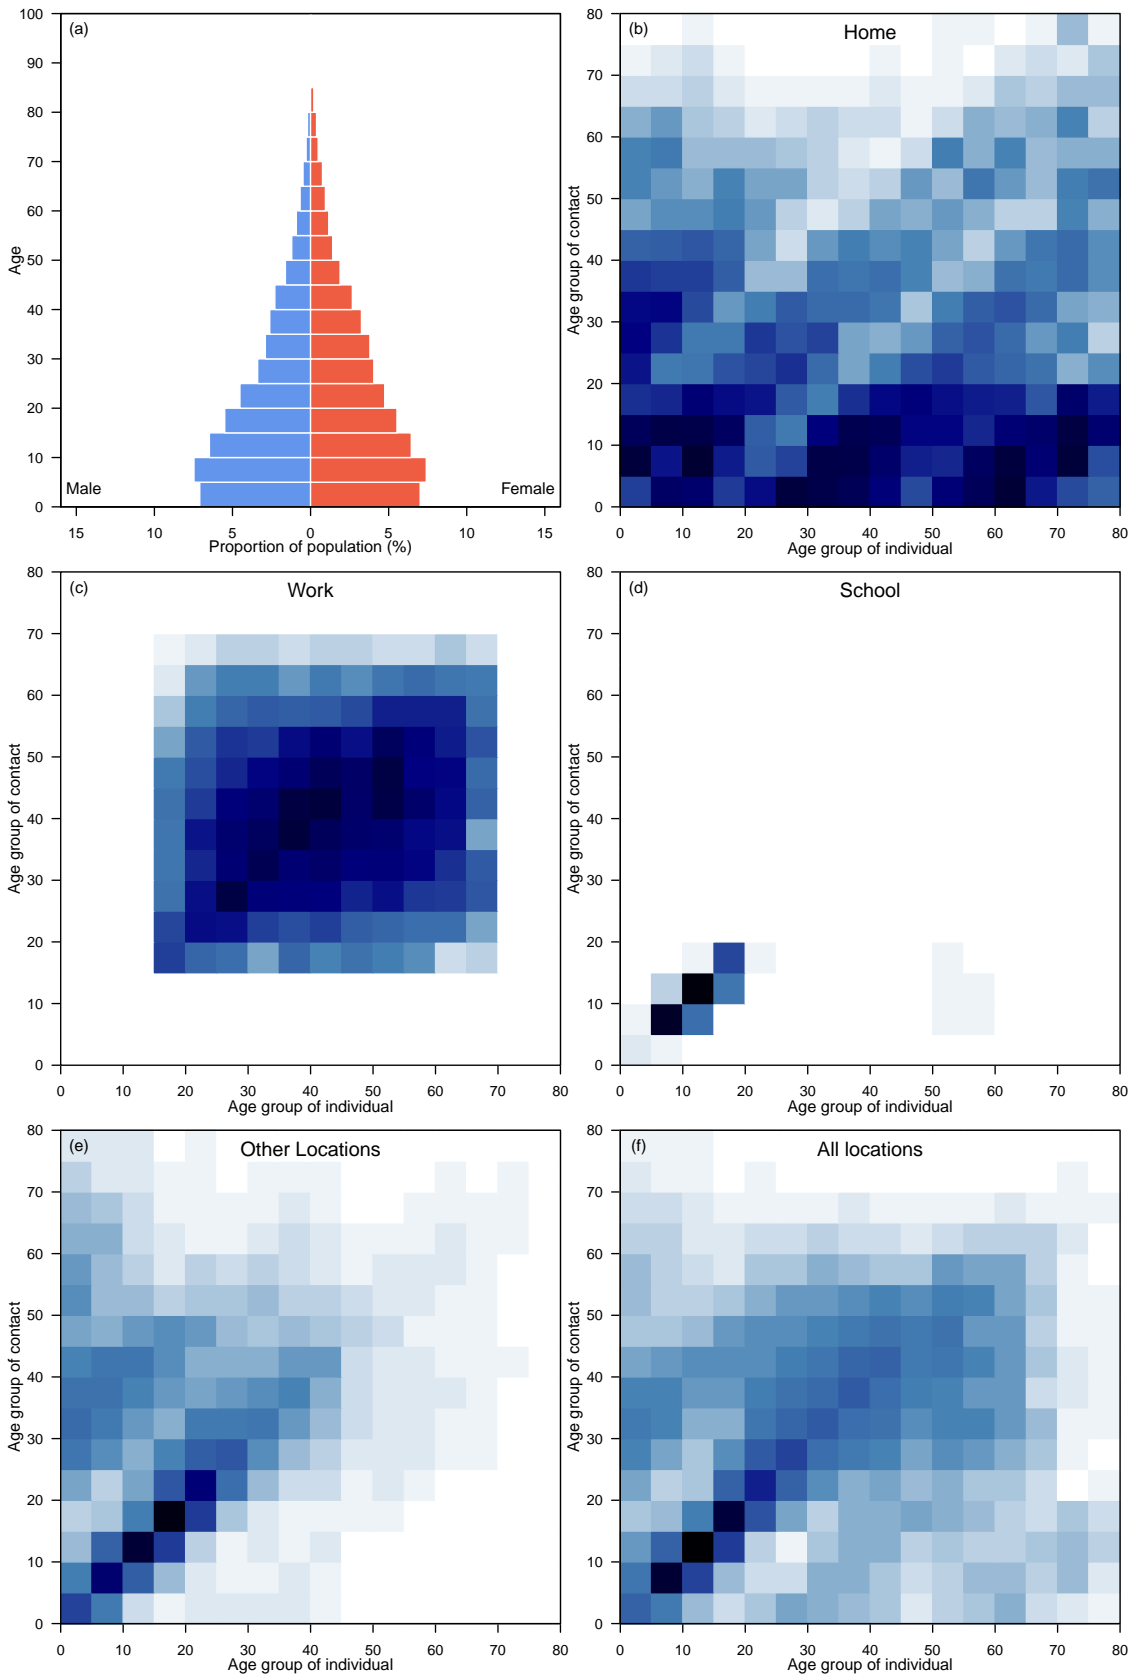



## **2.4 Comparison of the empirical and 2017 synthetic age-specific contact matrices in ten geographical regions**

The 2017 synthetic matrices provide validated approximations to age-and-location-specific contact matrices for 152 geographical regions. We compare the normalised empirical matrices with to the normalised 2017 synthetic matrices.

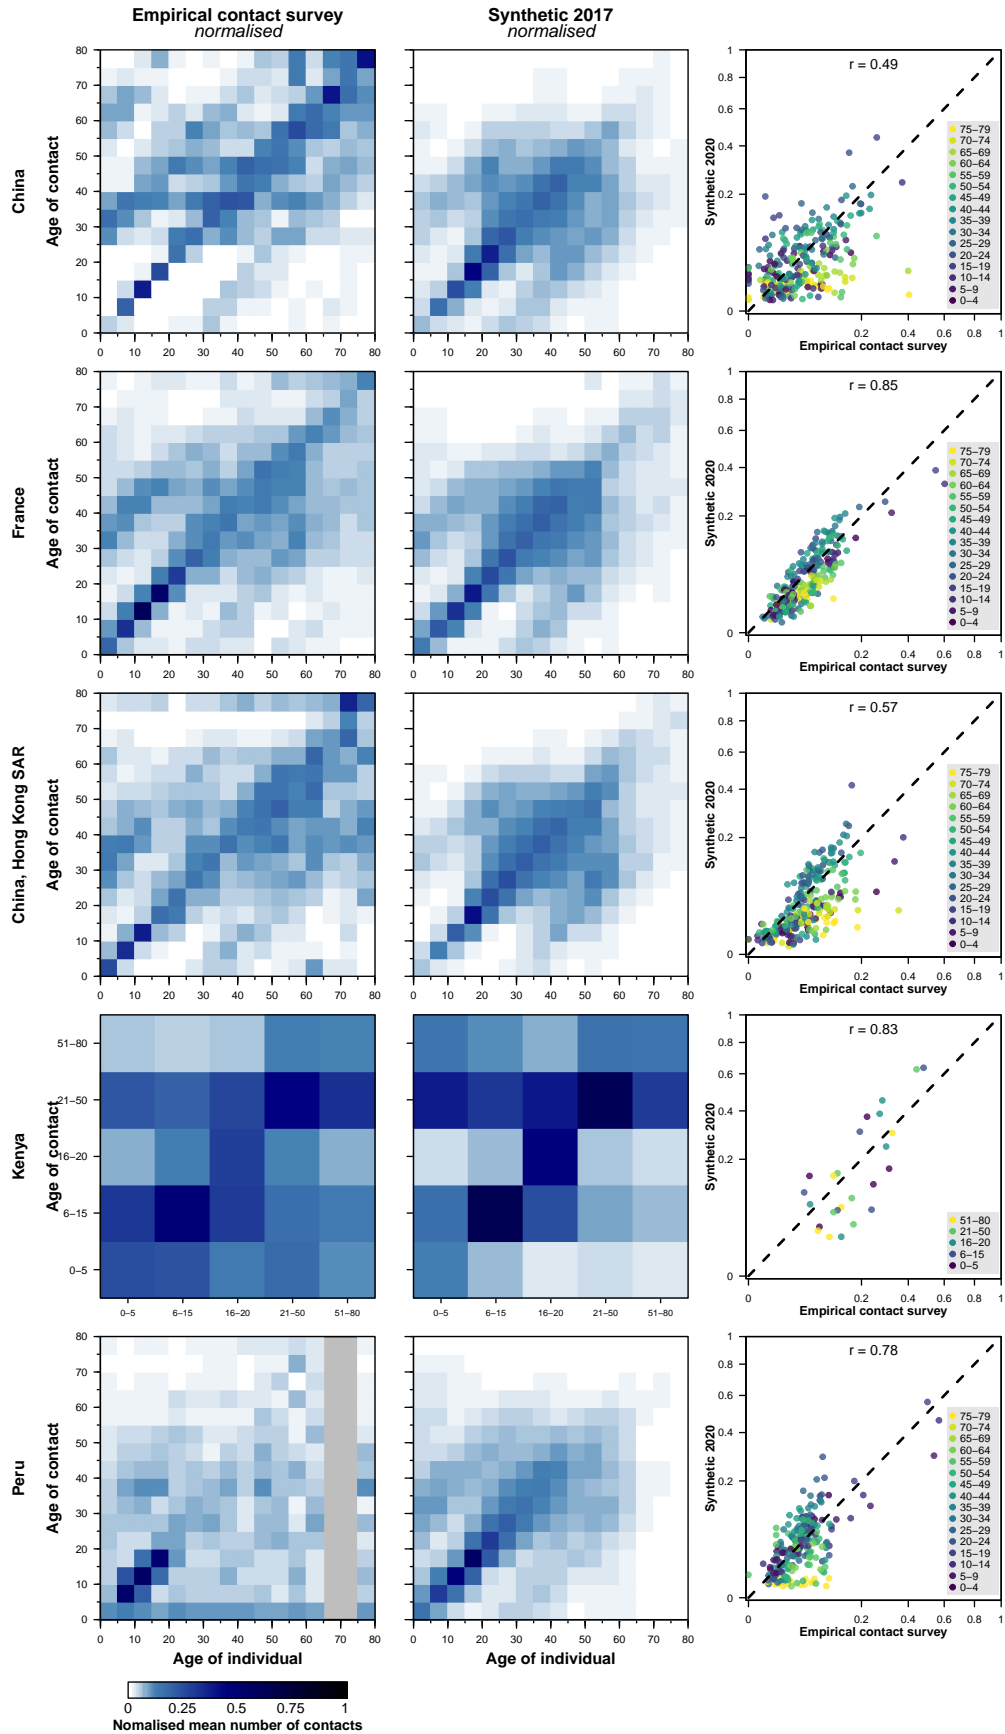

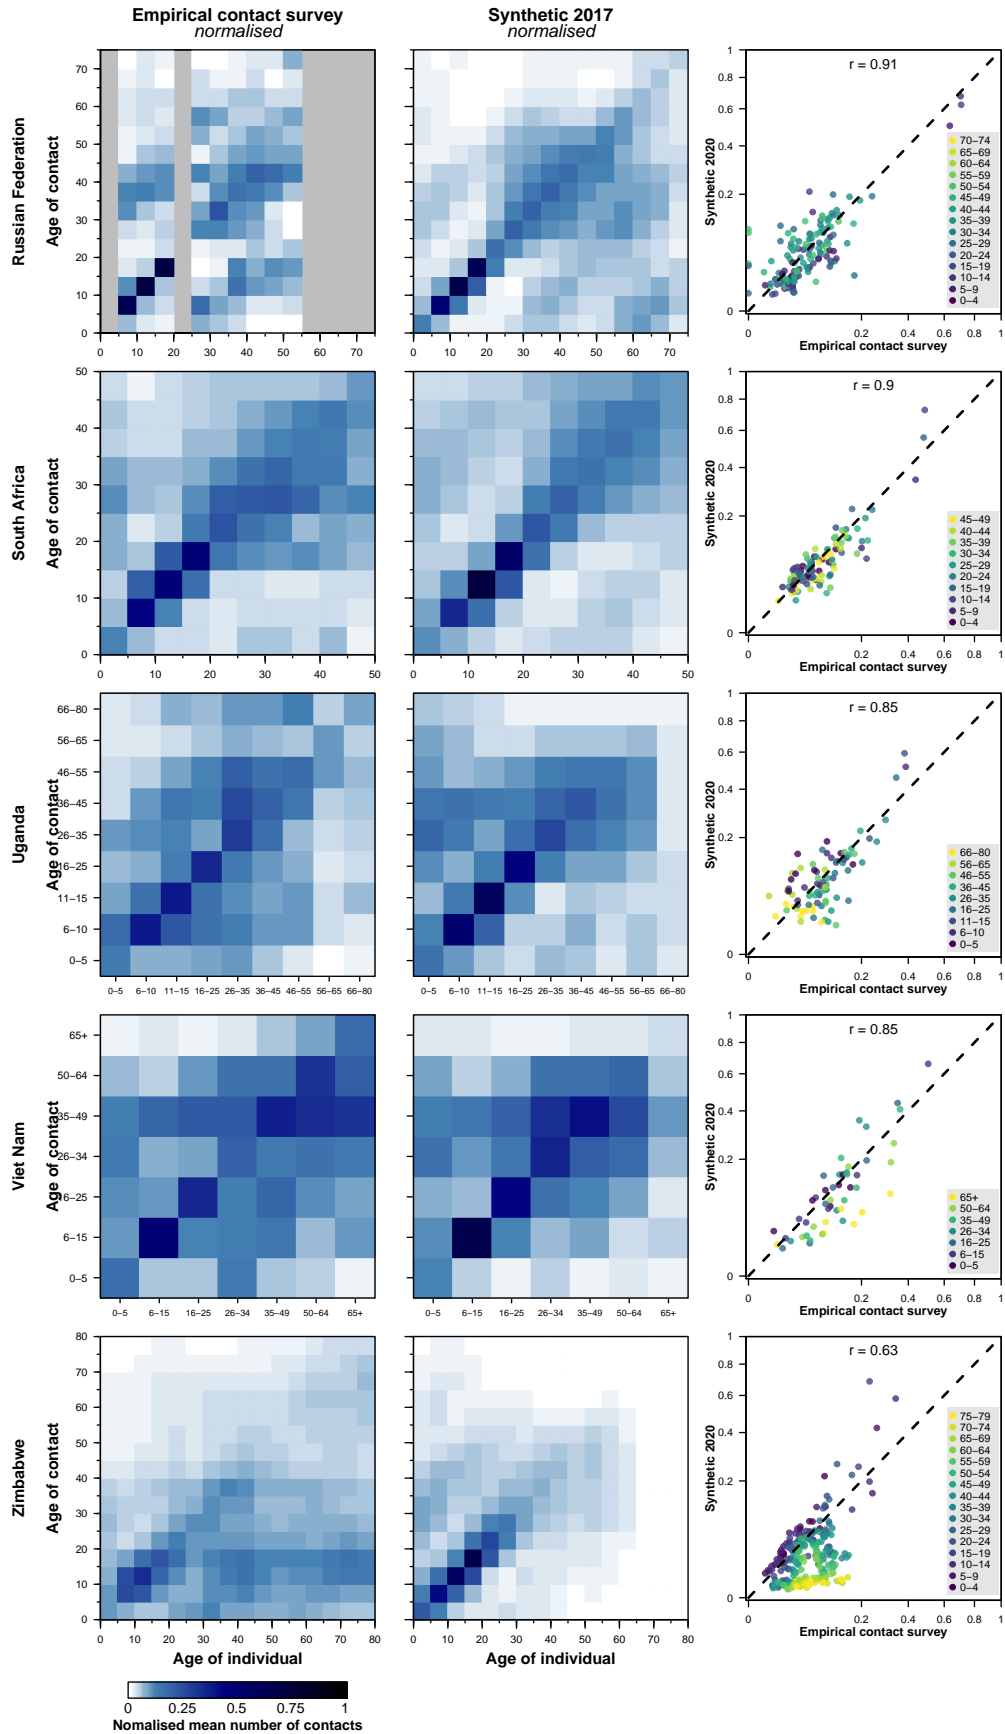

## 2.5 Age-specific infection attack rate of COVID-19

The age-specific infection attack rate for the unmitigated epidemic under different contact matrices is shown in the boxplots with boxes bounded by the interquartile range (25<sup>th</sup> and 75<sup>th</sup> percentiles), the median in white and, whiskers spanning the 2.5 – 97.5<sup>th</sup> percentiles (Figure 2). Six contact matrices were considered in the COVID-19 modelling: the empirically-constructed contact matrices at the study-year and adjusted for the 2020 population, the 2017 synthetic matrices, and the updated synthetic matrices at the national, rural, or urban settings. Models parameterised with the empirical and synthetic matrices generated similar findings with few differences observed in the age-specific infection attack rate (Figure 2) in age groups where the empirical matrices have missing or aggregated age groups (Table 4). This finding means that synthetic contact matrices may be used in modelling outbreaks in settings for which empirical studies have yet to be conducted.

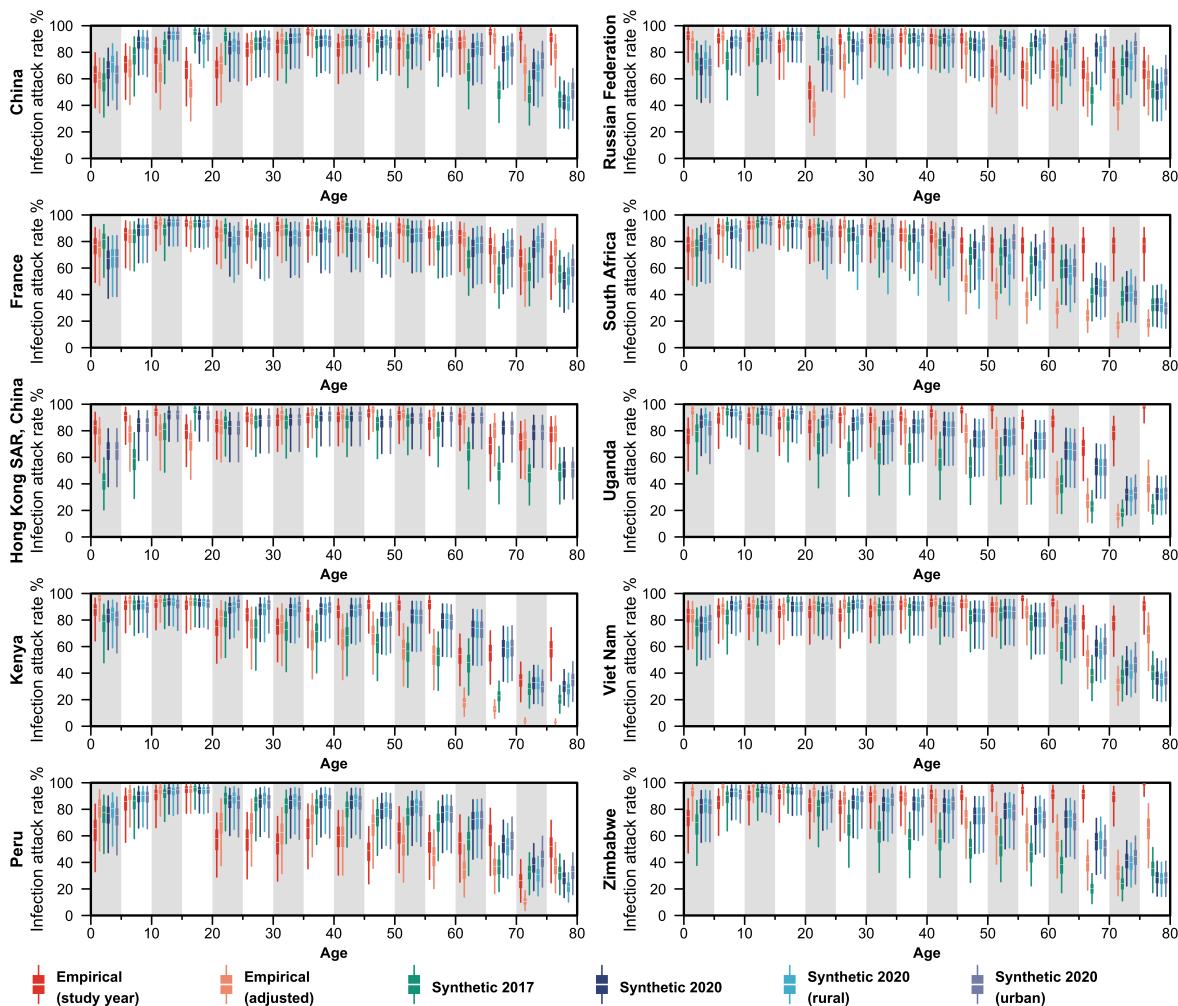

Figure 2: Age-specific infection attack rate of COVID-19.

Table 4: Possible reason for discrepancies in age-specific infection attack rates

| <b>Discrepancies in age-specific infection attack rates</b>                                                               | <b>Survey-specific details</b>                                                                                                                                         | <b>Possible reason for discrepancies</b>                                                                                                                                                                                                                                                                                                                                                                                                                                                  |
|---------------------------------------------------------------------------------------------------------------------------|------------------------------------------------------------------------------------------------------------------------------------------------------------------------|-------------------------------------------------------------------------------------------------------------------------------------------------------------------------------------------------------------------------------------------------------------------------------------------------------------------------------------------------------------------------------------------------------------------------------------------------------------------------------------------|
| Underestimation of infection attack rate in the oldest age group (i.e., 75+ year-olds) in China, and Hong Kong SAR, China | Synthetic matrices report a lower proportion of contacts in other locations for individuals 75+ year-olds compared to empirical matrices in Shanghai and Hong Kong SAR | Individuals 75+ year old in two highly densely populated cities in China appear to report more contacts outside home and work than their counterparts in the POLYMOD surveyed countries in Europe. In the HK SAR survey, this may be due to a much larger proportion of older individuals choosing to use paper rather than online questionnaires; the survey found that individuals using paper surveys reported much higher numbers of contacts than those using online questionnaires. |
| Overestimation of infection attack rate in the 10–20-year-olds in China                                                   | Synthetic matrices report a higher proportion of contacts in other locations for individuals 10–20-year-olds compared to empirical matrices in Shanghai, China         | Individuals 10–20-year-olds in Shanghai, China appear to report fewer contacts at other locations than their counterparts in the POLYMOD surveyed countries in Europe.                                                                                                                                                                                                                                                                                                                    |
| Differences in infection attack rate in individuals 50+ year-olds in Kenya                                                | In the study in Kilifi, Kenya, individuals aged 21–50 were aggregated and the oldest age group in the survey is 51+ year-olds.                                         | These differences are observed in age groups where the empirical matrices have aggregated age groups, which may obscure large differences within ages in that aggregated age group.                                                                                                                                                                                                                                                                                                       |
| Differences in infection attack rate in individuals aged 70–74-year-olds in Peru                                          | The study in San Marcos, Cajamarca-Peru did not survey any individuals aged 70–74-year-old.                                                                            | These differences are observed in age groups where the empirical matrices have missing age groups. Contacts in 70-74 year olds in the empirical matrices are based on assuming reciprocity of contacts for younger people reporting contacts with this age group, which we know from other surveys may lead to incorrect estimations.                                                                                                                                                     |

| <b>Discrepancies in age-specific infection attack rates</b>                        | <b>Survey-specific details</b>                                                                                                                                                                                                                                                                                                                                                                                                                                                                                                                                                                                                                              | <b>Possible reason for discrepancies</b>                                                                                                                                                                                                                                                                                                                                                                                                                                                                                                                                                                                                 |
|------------------------------------------------------------------------------------|-------------------------------------------------------------------------------------------------------------------------------------------------------------------------------------------------------------------------------------------------------------------------------------------------------------------------------------------------------------------------------------------------------------------------------------------------------------------------------------------------------------------------------------------------------------------------------------------------------------------------------------------------------------|------------------------------------------------------------------------------------------------------------------------------------------------------------------------------------------------------------------------------------------------------------------------------------------------------------------------------------------------------------------------------------------------------------------------------------------------------------------------------------------------------------------------------------------------------------------------------------------------------------------------------------------|
| Differences in infection attack rate in individuals aged 20–24-year-olds in Russia | The study in Tomsk, Russia did not survey any individuals aged 20–24-year-old.                                                                                                                                                                                                                                                                                                                                                                                                                                                                                                                                                                              | These differences are observed in age groups where the empirical matrices have missing age groups. Contacts in 20-24 year olds in the empirical matrices are based on assuming reciprocity of contacts for other people reporting contacts with this age group, which we know from other surveys may lead to incorrect estimations.                                                                                                                                                                                                                                                                                                      |
| Differences in infection attack rate in individuals 50+ year-olds in South Africa  | The oldest age group in the survey conducted in a South African township is 45+ year-olds. After adjusting for the South African 2020 population age composition, the differences narrow.                                                                                                                                                                                                                                                                                                                                                                                                                                                                   | These differences are observed in age groups where the empirical matrices have aggregated age groups, which may obscure large differences within ages in that aggregated age group.                                                                                                                                                                                                                                                                                                                                                                                                                                                      |
| Differences in infection attack rate in individuals 65+ year-olds in Uganda        | The oldest age group in the survey conducted in a Sheema North Sub-District, Uganda is 65+ year-olds. These differences narrow after adjusting for Uganda’s 2020 population age composition.                                                                                                                                                                                                                                                                                                                                                                                                                                                                | These differences are observed in age groups where the empirical matrices have aggregated age groups, which may obscure large differences within ages in that aggregated age group.                                                                                                                                                                                                                                                                                                                                                                                                                                                      |
| Differences in infection attack rate in individuals 65+ year-olds in Vietnam       | In the study in Red River Delta, North Vietnam, individuals aged 50–64 were aggregated and the oldest age group in the survey is 65+ year-olds. After adjusting for the Vietnamese 2020 population age composition, the differences narrow.                                                                                                                                                                                                                                                                                                                                                                                                                 | These differences are observed in age groups where the empirical matrices have aggregated age groups, which may obscure large differences within ages in that aggregated age group.                                                                                                                                                                                                                                                                                                                                                                                                                                                      |
| Differences in infection attack rate in individuals 65+ year-olds in Zimbabwe      | Compared to the empirical matrices in Manicaland, Zimbabwe, the synthetic matrices underestimate the number of contacts for individuals 65+ year-olds at other locations. The differences narrow after adjusting for the 2020 population age composition in Zimbabwe. The survey was administered during the school holiday in one of the two sites; they found a lower number of contact was reported in schools. As school-going children are not in school, they could be spending more time at home and possibly with their grandparents; and this could be one possible reason for the high contacts in older individuals with the younger population. | Synthetic matrices report fewer contacts in other locations for individuals aged 65+ years compared to the empirical matrices in Manicaland, Zimbabwe. The differences narrow after adjusting for the 2020 population age composition in Zimbabwe. The survey was administered during the school holiday in one of the two sites; they found a lower number of contact was reported in schools. As school-going children are not in school, they could be spending more time at home and possibly with their grandparents; and this could be one possible reason for the high contacts in older individuals with the younger population. |

## References

1. United Nations Department of Economic and Social Affairs Population Division. World Population Prospects. 2019. Available: <https://population.un.org/wpp/>
2. United Nations Department of Economic and Social Affairs Population Division. Urban and Rural Population by Age and Sex, 1980-2015. Available: <https://www.un.org/en/development/desa/population/publications/dataset/urban/urbanAndRuralPopulationByAgeAndSex.asp>
3. Mossong J, Hens N, Jit M, Beutels P, Auranen K, Mikolajczyk R, et al. Social Contacts and Mixing Patterns Relevant to the Spread of Infectious Diseases. Riley S, editor. *PLoS Medicine*. 2008;5: e74. doi:10.1371/journal.pmed.0050074
4. Demographic and Health Surveys. The DHS Program - Demographic and Health Survey (DHS). Available: <https://dhsprogram.com/What-We-Do/Survey-Types/DHS.cfm>
5. Prem K, Cook AR, Jit M. Projecting social contact matrices in 152 countries using contact surveys and demographic data. *PLoS Computational Biology*. 2017;13: e1005697. doi:10.1371/journal.pcbi.1005697
6. UNESCO Institute for Statistics. UIS Statistics. Available: <http://data.uis.unesco.org/>
7. International Labour Organization. Labour force by sex and age.
8. OECD. Teachers by age (indicator). 2020. doi:10.1787/93af1f9d-en
9. International Labour Organization. Labour force participation rate by sex, age and rural / urban areas.
10. OECD. Differences in rural and urban schools'; student-teacher ratio and class size, 2015. OECD Publishing; 2018.
11. Davies NG, Kucharski AJ, Eggo RM, Gimma A, Edmunds WJ, Jombart T, et al. Effects of non-pharmaceutical interventions on COVID-19 cases, deaths, and demand for hospital services in the UK: a modelling study. *The Lancet Public Health*. 2020;0. doi:10.1016/s2468-2667(20)30133-x
12. van Zandvoort K, Jarvis CI, Pearson C, Davies NG, CMMID COVID-19 working Group, Russell TW, et al. Response strategies for COVID-19 epidemics in African settings: a mathematical modelling study. medRxiv. 2020; 2020.04.27.20081711. doi:10.1101/2020.04.27.20081711
13. Jarvis CI, Van Zandvoort K, Gimma A, Prem K, Klepac P, Rubin GJ, et al. Quantifying the impact of physical distance measures on the transmission of COVID-19 in the UK. *BMC Medicine*. 2020;18: 124. doi:10.1186/s12916-020-01597-8
14. Li Q, Guan X, Wu P, Wang X, Zhou L, Tong Y, et al. Early Transmission Dynamics in Wuhan, China, of Novel Coronavirus-Infected Pneumonia. *New England Journal of Medicine*. 2020. doi:10.1056/nejmoa2001316
15. Bi Q, Wu Y, Mei S, Ye C, Zou X, Zhang Z, et al. Epidemiology and Transmission of COVID-19 in Shenzhen China: Analysis of 391 cases and 1,286 of their close contacts. medRxiv. 2020; 2020.03.03.20028423. doi:10.1101/2020.03.03.20028423
16. Nishiura H, Linton NM, Akhmetzhanov AR. Serial interval of novel coronavirus (COVID-19) infections. *International Journal of Infectious Diseases*. 2020;93: 284–286. doi:10.1016/j.ijid.2020.02.060
17. Liu Y, Funk S, Flasche S. The contribution of pre-symptomatic infection to the transmission dynamics of COVID-2019. *Wellcome Open Research*. 2020;5: 58. doi:10.12688/wellcomeopenres.15788.1
18. Davies NG, Klepac P, Liu Y, Prem K, Jit M, Eggo RM. Age-dependent effects in the transmission and control of COVID-19 epidemics. *Nature Medicine*. 2020; 1–7. doi:10.1038/s41591-020-0962-9
19. Linton NM, Kobayashi T, Yang Y, Hayashi K, Akhmetzhanov AR, Jung S-m, et al. Incubation Period and Other Epidemiological Characteristics of 2019 Novel Coronavirus Infections with Right Truncation: A Statistical Analysis of Publicly Available Case Data. *Journal of Clinical Medicine*. 2020;9: 538. doi:10.3390/jcm9020538

20. Cao B, Wang Y, Wen D, Liu W, Wang J, Fan G, et al. A Trial of Lopinavir–Ritonavir in Adults Hospitalized with Severe Covid-19. *New England Journal of Medicine*. 2020;382: 1787–1799. doi:10.1056/NEJMoa2001282
21. The Novel Coronavirus Pneumonia Emergency Response Epidemiology Team. The epidemiological characteristics of an outbreak of 2019 novel coronavirus disease (COVID-19)—China. 2020. *China CDC Wkly*. 2020;2: 113–122.
